# Supplementary material
Source: PubMed Central journal article supplement (PMC4622922)
Supplement: kepi-10-09-1073879-s001.pdf [file kepi-10-09-1073879-s001.pdf]

# Supplementary Data

## **Altering TET dioxygenase levels within physiological range affects DNA methylation dynamics of HEK293 cells**

Christian Grosser, Nicholas Wagner, Katrin Grothaus, Bernhard Horsthemke

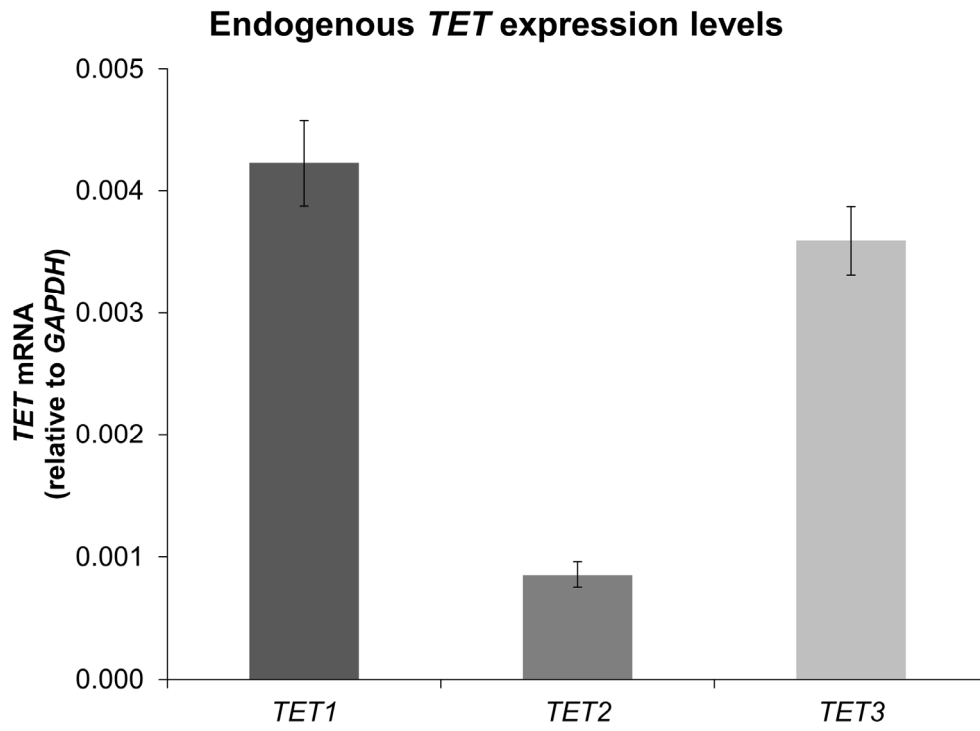

**Figure S1.** HEK293 cells show low endogenous *TET* expression levels. Quantitative real-time RT-PCR demonstrates low basal *TET* transcript levels in T-REx-293-GFP cell lines treated with scrambled control siRNAs. Measurements were performed in triplicates for the T-REx-293-GFP cell lines #1-3 and presented as mean  $\pm$  SD.

**A**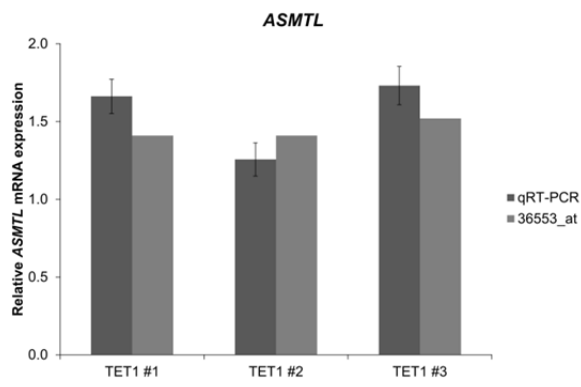**B**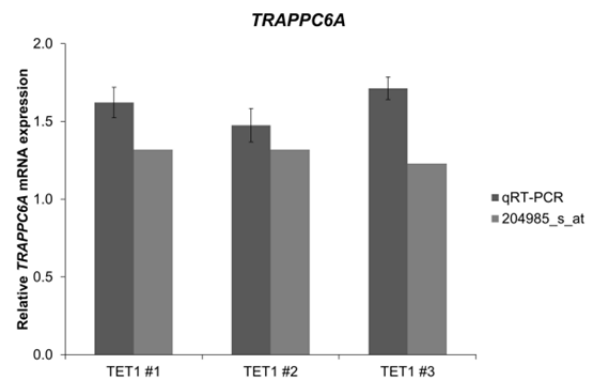**C**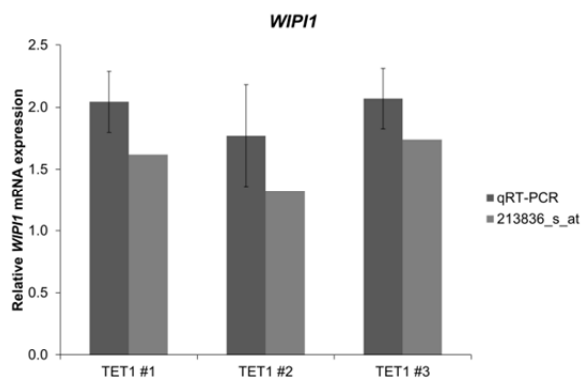**D**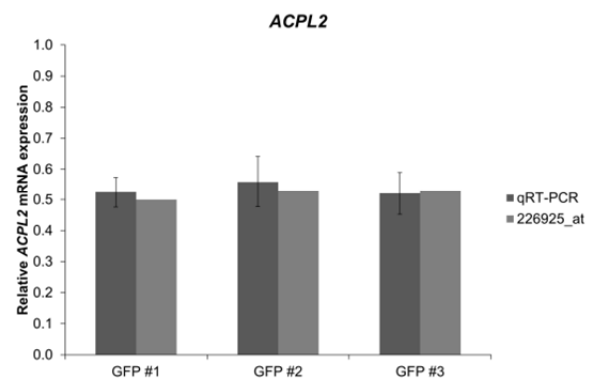**E**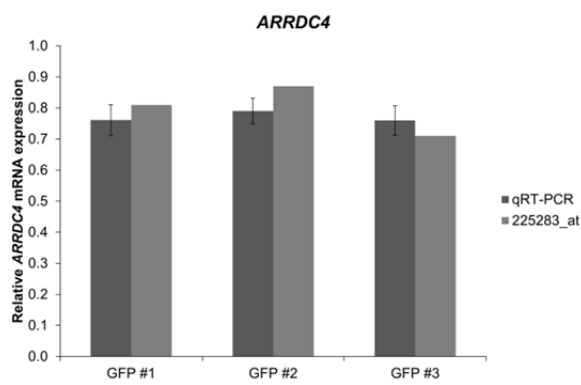**F**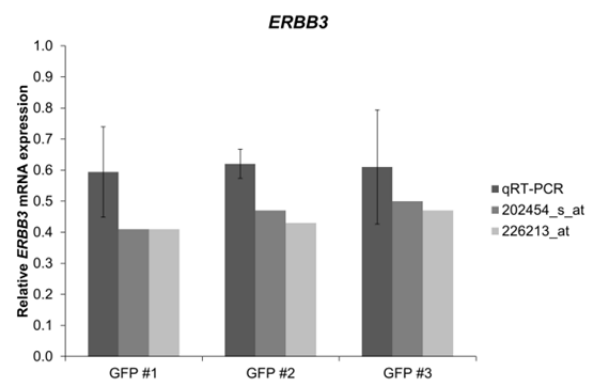**G**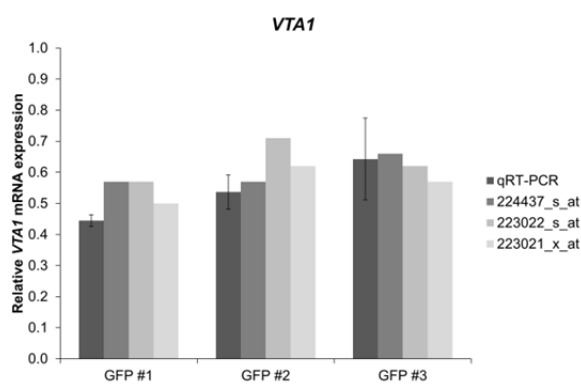**H**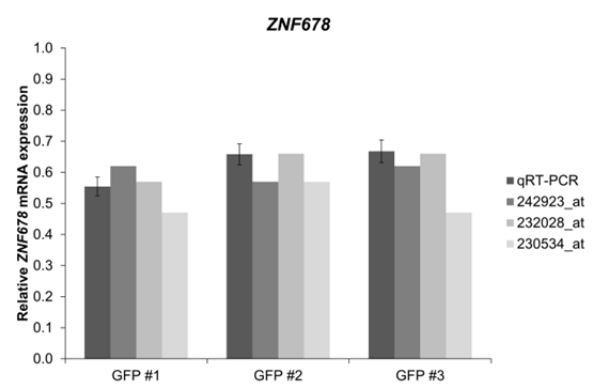

**Figure S2.** Exemplary verification of microarray gene expression data by quantitative real-time RT-PCR. Expression of upregulated genes upon *TET1* overexpression (**A-C**) and downregulated genes upon *TET* triple knockdown (**D-H**) normalized to *GAPDH* expression and relative to uninduced or scrambled controls, respectively. Microarray expression data is shown by Affymetrix probe set IDs. Quantitative real-time RT-PCR measurements (qRT-PCR) were performed in quadruplicates and presented as mean  $\pm$  SD.

**A****Promoters (TET1 -dox)**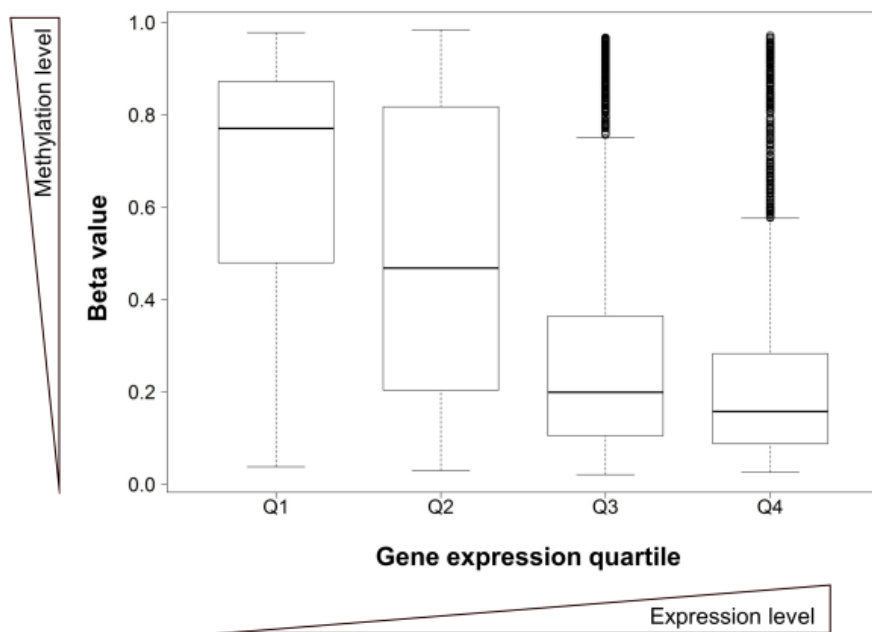**B****Promoters (scr)**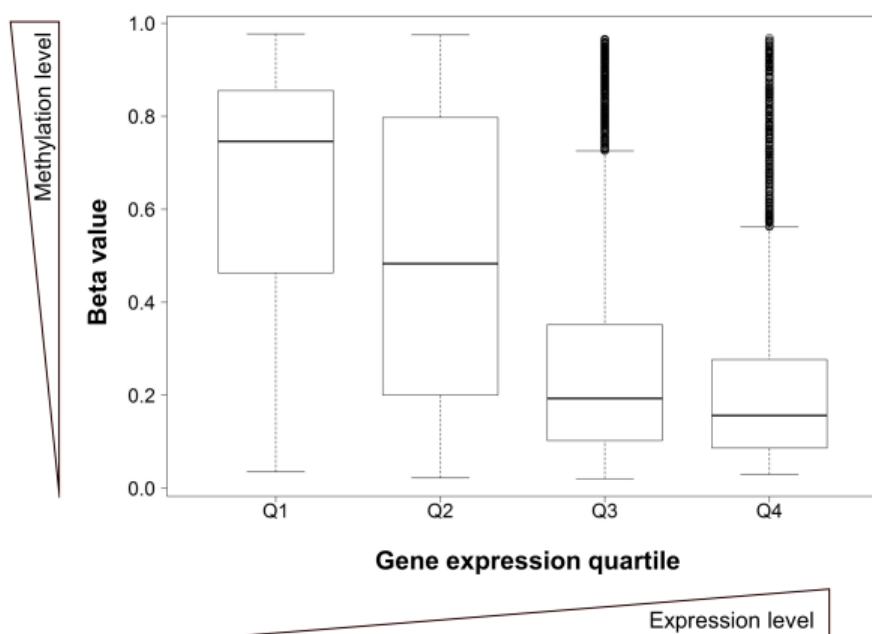

**Figure S3.** Promoter methylation levels and gene expression intensities are negatively correlated. Microarray gene expression data of the control cell lines from the *TET1* overexpression (**A**) and *TET* triple knockdown studies (**B**) were stratified into quartiles of expression and compared to respective promoter methylation levels determined by Infinium HumanMethylation450 BeadChips. Boxes mark the interquartile range with whiskers indicating the 1.5x interquartile range. Outliers beyond the whiskers are plotted. Q1 – Q4: gene expression quartiles ranging from lowest to highest expression levels.

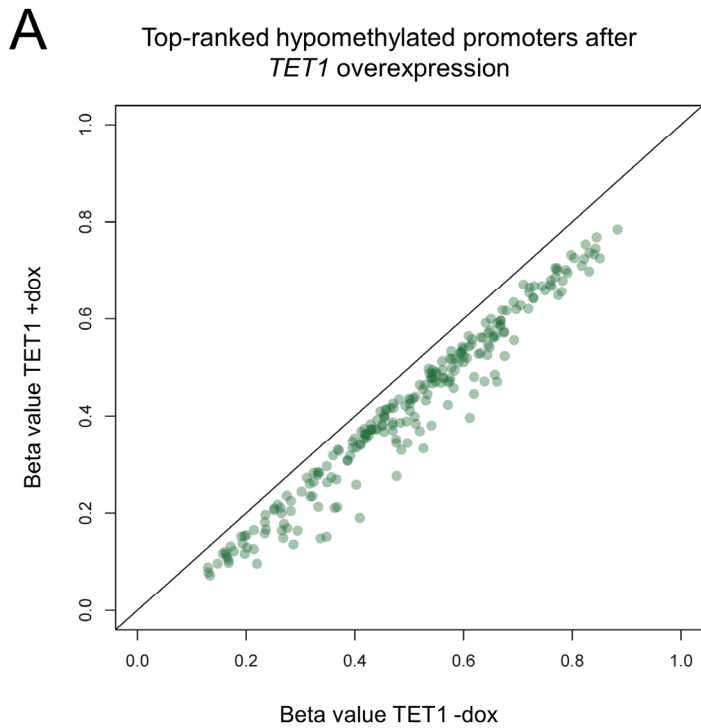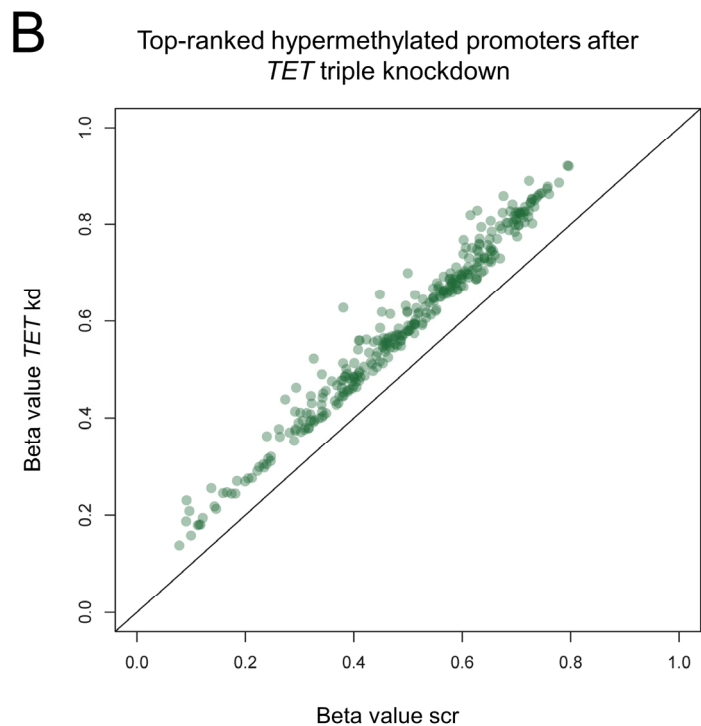

**Figure S4.** Preservation of methylation patterns among top-ranked differentially methylated promoters. After filtering for identical gene symbols between the methylation and gene expression data sets, the top-ranked differentially methylated gene promoters that showed a methylation decrease after *TET1* overexpression (**A**) or a methylation increase upon *TET* knockdown (**B**) had preserved their distribution patterns. Shown are comparisons of mean methylation beta values after induced overexpression of *TET1* (*TET1* +dox) and triple knockdown of the TET enzymes (*TET* kd) compared to the respective uninduced (*TET1* -dox) or scrambled controls (scr). The black line illustrates a perfect positive correlation. *TET1* overexpression:  $n = 234$ , *TET* triple knockdown:  $n = 322$

**A**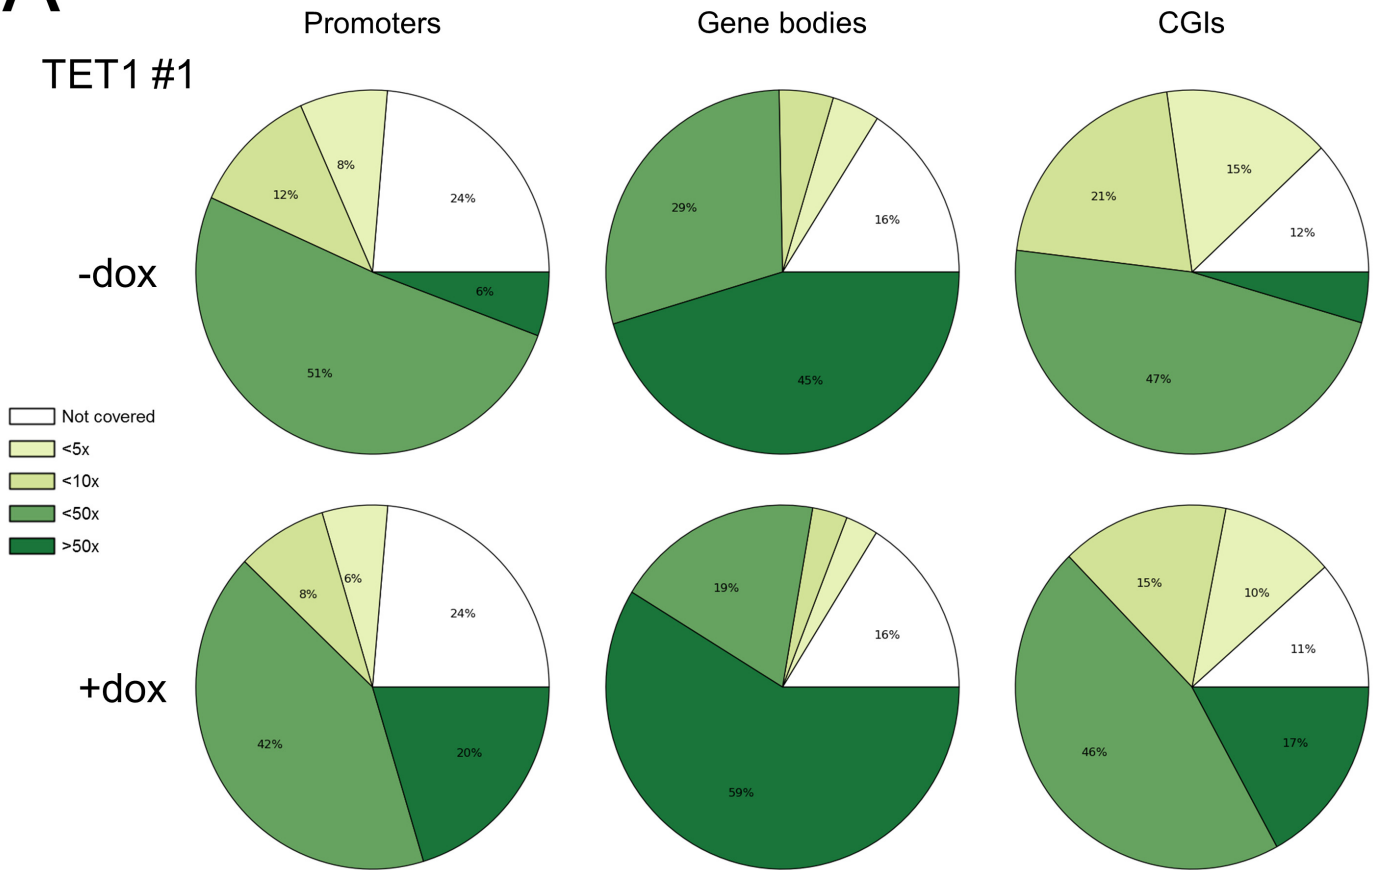**B**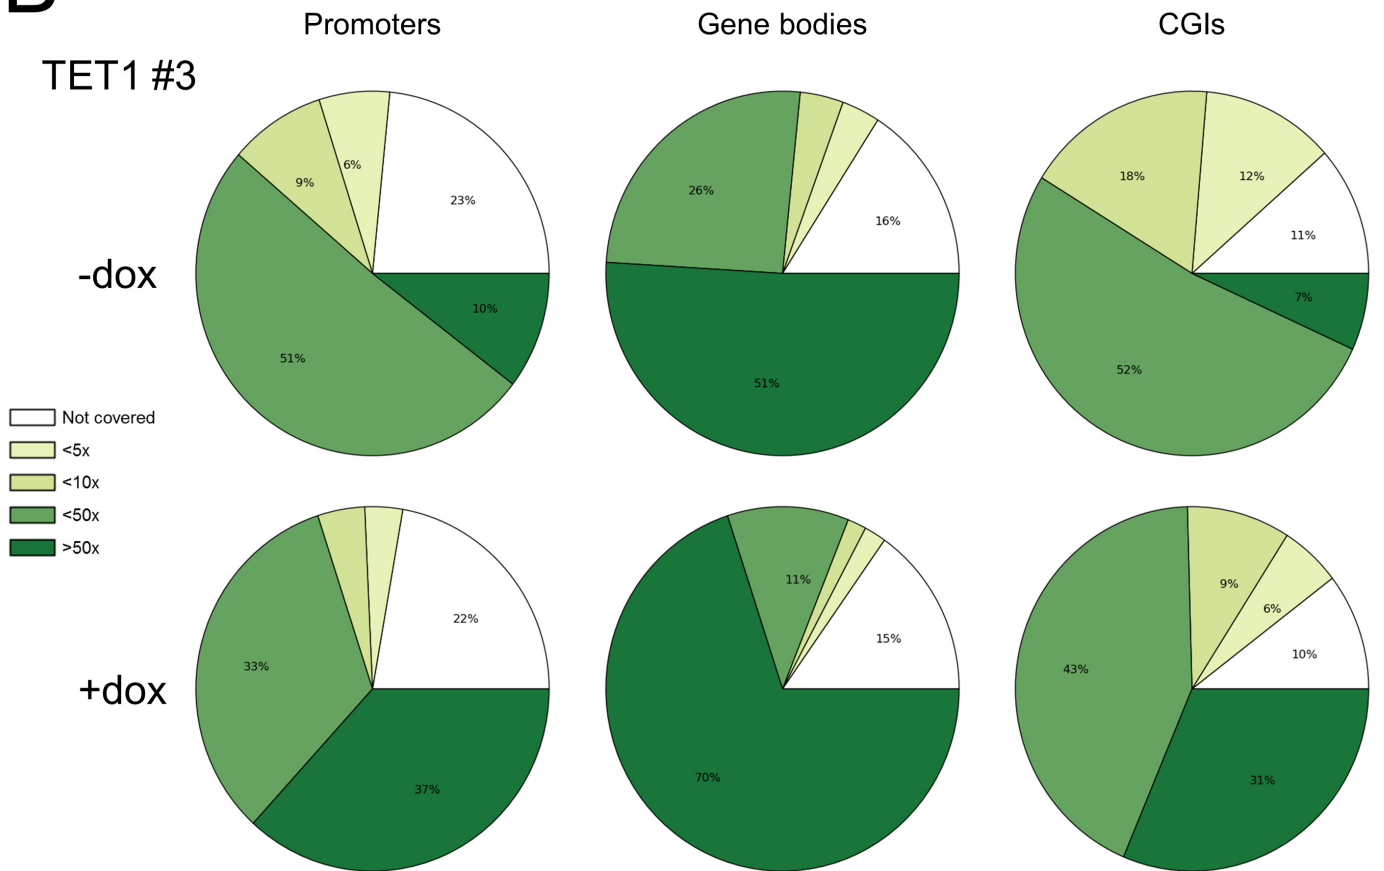

**Figure S5.** *TET1* overexpression leads to a strong increase of 5hmC-dense promoters, gene bodies and CGIs. Shown are coverage pie charts of the 5hmC DNA modification as determined by RRHP for the TET1 #1 (**A**) and TET1 #3 (**B**) T-REx-293-TET1 cell lines in uninduced (-dox) and induced state (+dox). Annotations were obtained from RefSeq and CpG island lists downloaded from the UCSC website. Promoters are defined as the regions spanning from 1 kb upstream to 1 kb downstream of transcription start sites.



Promoter sites ( $n = 78,636$ )

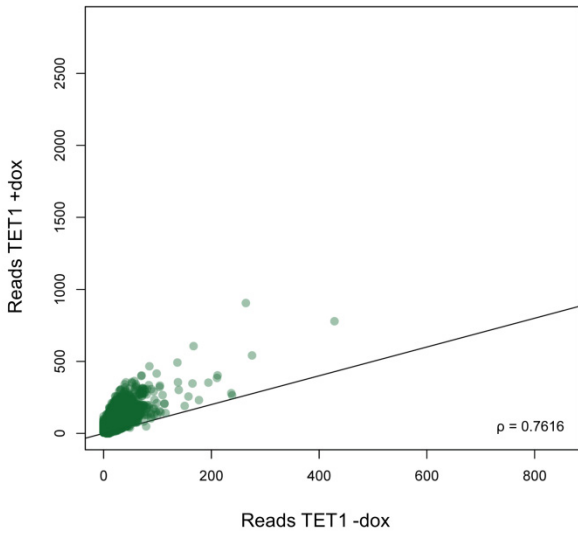

Gene body sites ( $n = 517,536$ )

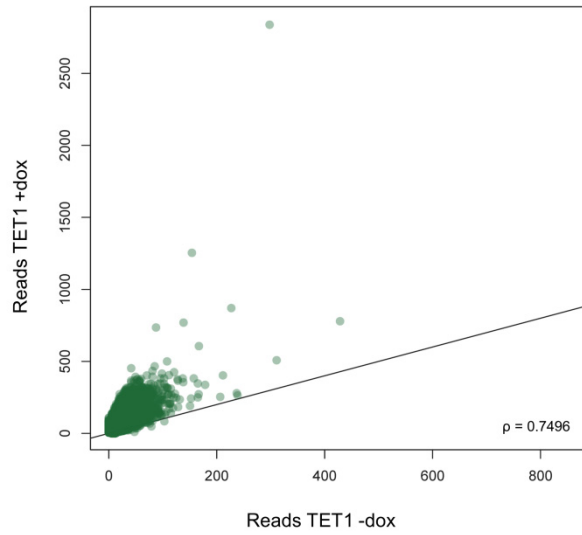

CGI sites ( $n = 64,373$ )

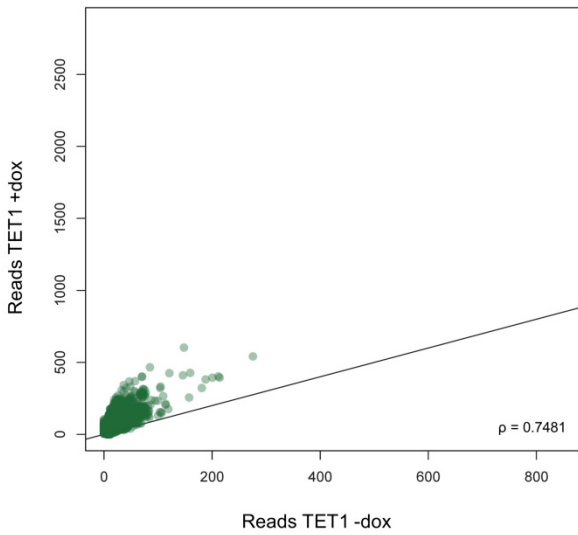

Non-CGI sites ( $n = 713,959$ )

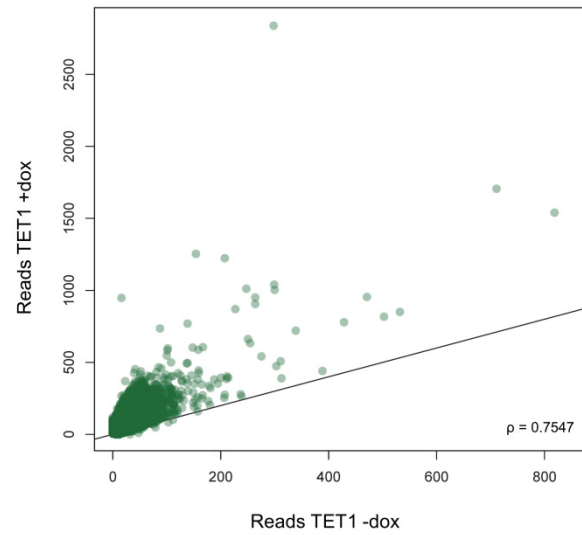

Intergenic sites ( $n = 230,055$ )

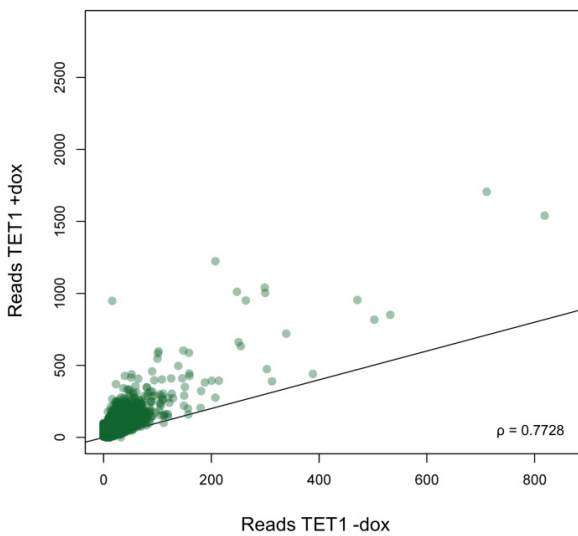

**Figure S6.** *TET1* overexpression leads to increased 5hmC levels in all genomic regions analyzed. Two T-REx-293-TET1 cell lines in uninduced and induced state were subjected to RRHP. Shown are averaged read counts reflecting 5hmC abundance in *TET1*-overexpressing (TET1 +dox) and control cells (TET1 -dox). CpG sites with less than five reads were considered zero. The black line illustrates a perfect positive correlation.  $\rho$ = Pearson correlation coefficient

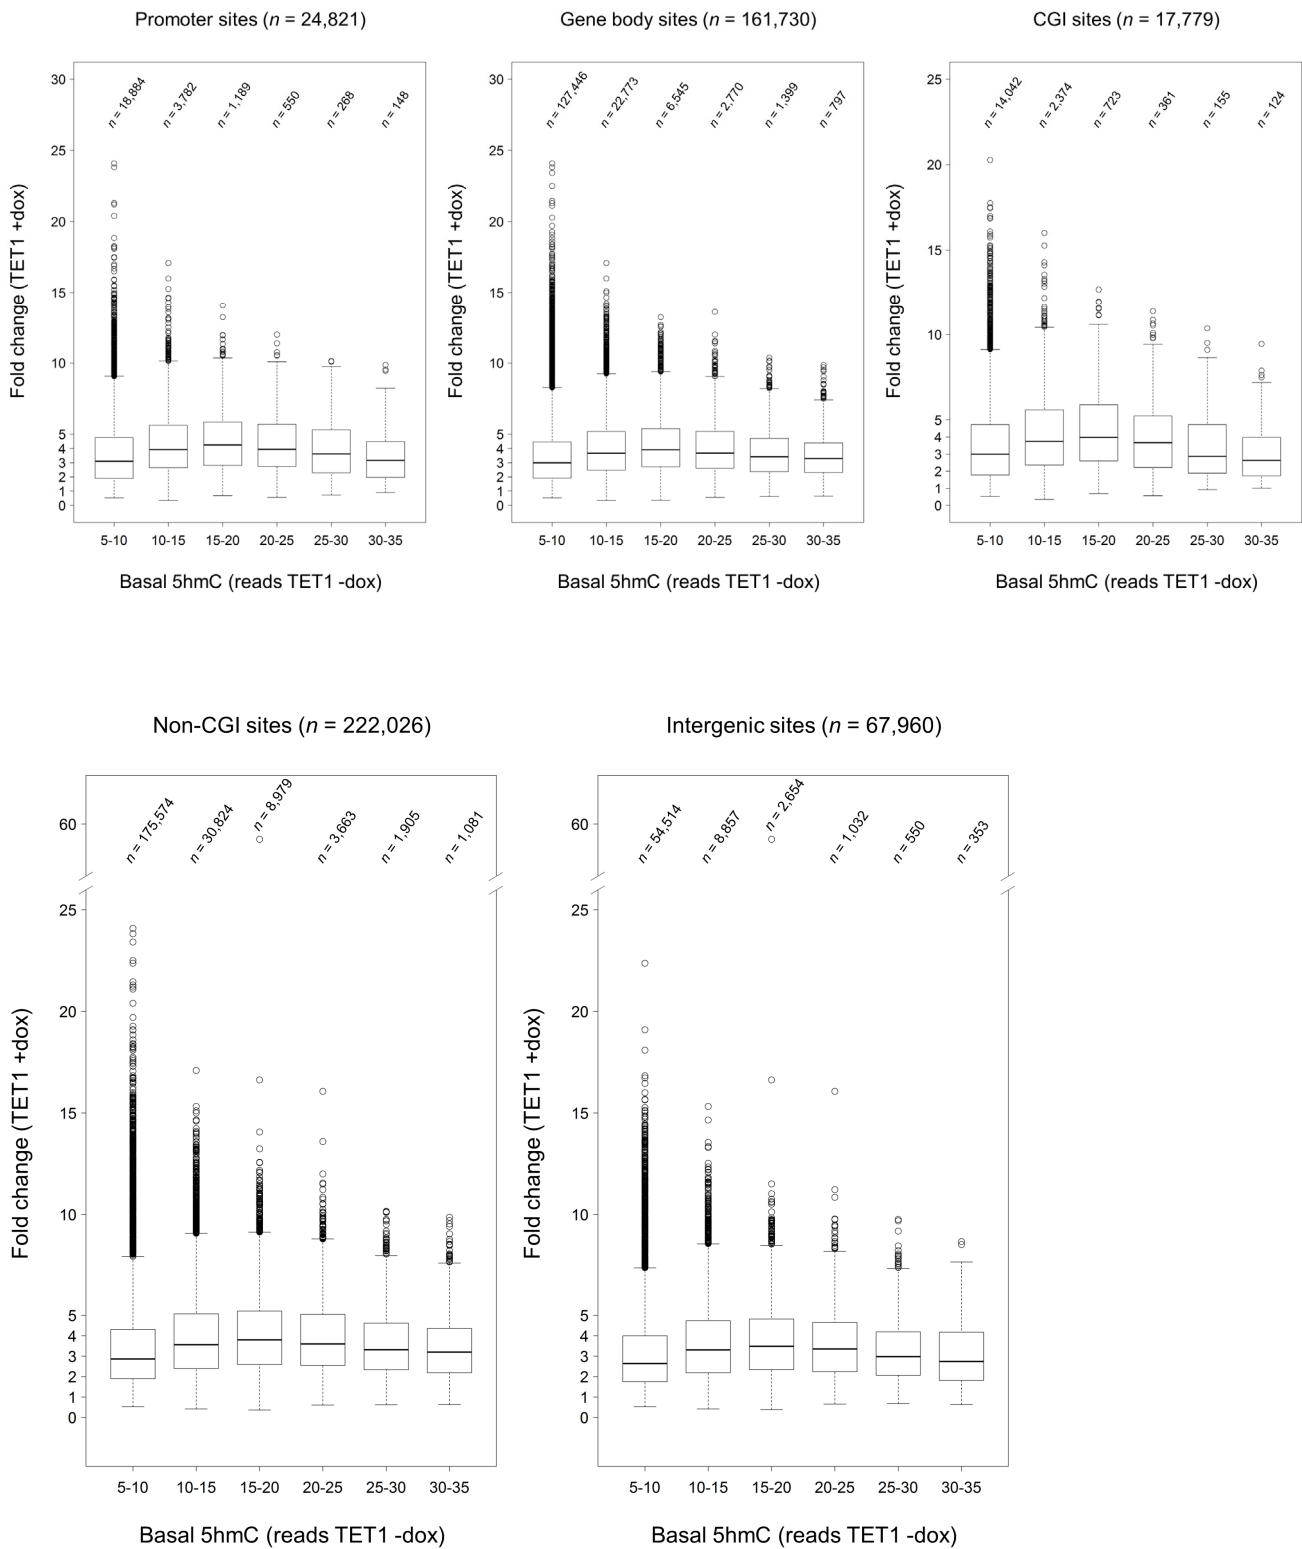

**Figure S7.** TET1-mediated 5mC oxidation is associated with endogenous 5hmC levels in various genomic regions. Endogenous 5hmC read levels in control cells (reads TET1 -dox) are compared to the fold changes of 5hmC that occurred after *TET1* overexpression (TET1 +dox). Sites with basal 5hmC levels corresponding to 15-20 reads showed the highest increase. Only CpG sites with five or more reads in *TET1*-overexpressing and control cells were considered. Boxes mark the interquartile range with whiskers indicating the 1.5x interquartile range. Outliers beyond the whiskers are plotted.

**Supplementary Table S1. List of the 1,000 top-ranked, differentially methylated promoters after induced overexpression of *TET1*.**This table is related to **Fig. 2A**. "NA" : No gene symbol provided.

| gene_symbol | chromosome | start     | end       | beta.TET1+Dox | beta.TET1-Dox | difference   | num.sites | rank |
|-------------|------------|-----------|-----------|---------------|---------------|--------------|-----------|------|
| IFI44       | chr1       | 79113981  | 79115980  | 0.190210932   | 0.409157366   | -0.218946433 | 1         | 1    |
| TRGV3       | chr7       | 38398264  | 38400263  | 0.155041443   | 0.367268093   | -0.21222665  | 2         | 2    |
| NA          | chr1       | 78693783  | 78695782  | 0.295133638   | 0.544241361   | -0.249107723 | 2         | 3    |
| NA          | chr16      | 21636563  | 21638562  | 0.386915096   | 0.641065122   | -0.254150026 | 1         | 4    |
| PRC1        | chr15      | 91538360  | 91540359  | 0.212478088   | 0.36766959    | -0.155191503 | 1         | 5    |
| ZNF726      | chr19      | 24096178  | 24098177  | 0.141953305   | 0.327020175   | -0.18506687  | 1         | 6    |
| CLEC5A      | chr7       | 141646308 | 141648307 | 0.332514009   | 0.526198143   | -0.193684134 | 1         | 7    |
| PRKRIRP7    | chr8       | 79674167  | 79676166  | 0.339430918   | 0.145788105   | 0.193642813  | 1         | 8    |
| GLIS2       | chr16      | 4363262   | 4365261   | 0.136088356   | 0.28710581    | -0.151017454 | 4         | 9    |
| KRTAP19-6   | chr21      | 31913684  | 31915683  | 0.335823175   | 0.488154289   | -0.152331113 | 2         | 10   |
| RNA5SP42    | chr1       | 34577050  | 34579049  | 0.391115907   | 0.588939481   | -0.197823575 | 1         | 11   |
| SPRR2G      | chr1       | 153122846 | 153124845 | 0.148150654   | 0.336810049   | -0.188659395 | 2         | 12   |
| NA          | chr3       | 110611824 | 110613823 | 0.361018596   | 0.539879881   | -0.178861285 | 1         | 13   |
| TRGV10      | chr7       | 38339424  | 38341423  | 0.331477967   | 0.487728367   | -0.1562504   | 1         | 14   |
| TRBVB       | chr7       | 142417712 | 142419711 | 0.502936609   | 0.329692569   | 0.17324404   | 1         | 15   |
| NA          | chr2       | 64870246  | 64872245  | 0.182429882   | 0.313444564   | -0.131014682 | 1         | 16   |
| LINC00504   | chr4       | 14889294  | 14891293  | 0.320456569   | 0.467990765   | -0.147534196 | 1         | 17   |
| NA          | chr5       | 2183324   | 2185323   | 0.239658326   | 0.36770856    | -0.128050234 | 1         | 18   |
| MIR550A1    | chr7       | 30327910  | 30329909  | 0.287333918   | 0.424083114   | -0.136749196 | 1         | 19   |
| NA          | chr5       | 22141078  | 22143077  | 0.471654419   | 0.638563701   | -0.166909282 | 2         | 20   |
| PMCHL1      | chr5       | 22140961  | 22142960  | 0.471654419   | 0.638563701   | -0.166909282 | 2         | 21   |
| ZNF510      | chr9       | 99539912  | 99541911  | 0.096527523   | 0.220102259   | -0.123574736 | 4         | 22   |
| MIR320D2    | chrX       | 140007885 | 140009884 | 0.217399129   | 0.348950725   | -0.131551596 | 3         | 23   |
| NA          | chr16      | 24681884  | 24683883  | 0.159635977   | 0.282687984   | -0.123052006 | 2         | 24   |
| MIR509-2    | chrX       | 146339869 | 146341868 | 0.128498339   | 0.25125834    | -0.122760001 | 1         | 25   |
| C1orf68     | chr1       | 152690498 | 152692497 | 0.329523184   | 0.48564099    | -0.156117807 | 2         | 26   |
| NA          | chr2       | 4703306   | 4705305   | 0.278170485   | 0.405671808   | -0.127501324 | 4         | 27   |
| GFRAL       | chr6       | 55190767  | 55192766  | 0.515688989   | 0.680968349   | -0.165279361 | 2         | 28   |
| NA          | chr5       | 157600904 | 157602903 | 0.45661821    | 0.645226633   | -0.188608423 | 1         | 29   |
| CASP5       | chr11      | 104893396 | 104895395 | 0.344211792   | 0.496909229   | -0.152697437 | 2         | 30   |
| NA          | chr1       | 147760558 | 147762557 | 0.627048846   | 0.447501728   | 0.179547118  | 1         | 31   |
| NA          | chr15      | 96589660  | 96591659  | 0.392306614   | 0.568765589   | -0.176458975 | 1         | 32   |
| TSPY13P     | chrY       | 9745249   | 9747248   | 0.396539801   | 0.281606303   | 0.114933498  | 1         | 33   |
| BBS2        | chr16      | 56553696  | 56555695  | 0.213021516   | 0.332673888   | -0.119652371 | 7         | 34   |
| NA          | chr5       | 18745783  | 18747782  | 0.588806554   | 0.470120524   | 0.11868603   | 2         | 35   |
| NA          | chr10      | 10099185  | 10101184  | 0.514088933   | 0.664274589   | -0.150185656 | 2         | 36   |
| NA          | chr4       | 17187183  | 17189182  | 0.251582015   | 0.523275334   | -0.271693319 | 2         | 37   |
| OR7G1       | chr19      | 9225940   | 9227939   | 0.536857222   | 0.741637839   | -0.204780617 | 1         | 38   |
| NA          | chr1       | 234699544 | 234701543 | 0.404213163   | 0.5587646     | -0.154551437 | 1         | 39   |
| NA          | chr11      | 66032638  | 66034637  | 0.595370637   | 0.816795348   | -0.221424711 | 1         | 40   |
| NA          | chr17      | 27076598  | 27078597  | 0.418464333   | 0.295876691   | 0.122587642  | 1         | 41   |
| NA          | chr17      | 40424202  | 40426201  | 0.79823675    | 0.582505651   | 0.215731099  | 1         | 42   |
| RPA3        | chr7       | 7757739   | 7759738   | 0.532911849   | 0.388233086   | 0.144678762  | 1         | 43   |
| NUDT21      | chr16      | 56485612  | 56487611  | 0.169161709   | 0.275703275   | -0.106541566 | 3         | 44   |
| NA          | chr17      | 18226036  | 18228035  | 0.523888046   | 0.714679455   | -0.190791409 | 1         | 45   |
| SLC9A7P1    | chr12      | 98850424  | 98852423  | 0.131880689   | 0.245959396   | -0.114078707 | 5         | 46   |
| UBQLN4P2    | chr2       | 153731834 | 153733833 | 0.305332155   | 0.533824311   | -0.228492156 | 1         | 47   |
| SUB1        | chr5       | 32530239  | 32532238  | 0.485288944   | 0.657497376   | -0.172208432 | 1         | 48   |
| TMEM114     | chr16      | 8621805   | 8623804   | 0.457937341   | 0.581749361   | -0.12381202  | 4         | 49   |
| NA          | chr1       | 71471686  | 71473685  | 0.469832767   | 0.324119644   | 0.145713123  | 1         | 50   |
| SNCAIP      | chr5       | 121645549 | 121647548 | 0.469767788   | 0.571696277   | -0.101928489 | 5         | 51   |
| NPNT        | chr4       | 106814432 | 106816431 | 0.163756406   | 0.294740012   | -0.130983605 | 3         | 52   |
| NA          | chr16      | 47998083  | 48000082  | 0.402225074   | 0.19581744    | 0.206407634  | 1         | 53   |
| TTLL11-IT1  | chr9       | 124725499 | 124727498 | 0.274095062   | 0.475529329   | -0.201434266 | 1         | 54   |
| RNU6-173P   | chr4       | 189042289 | 189044288 | 0.297431615   | 0.412957275   | -0.11552566  | 1         | 55   |
| KLHL3       | chr5       | 137071280 | 137073279 | 0.573589662   | 0.674707154   | -0.101117492 | 6         | 56   |
| NA          | chr6       | 112555460 | 112557459 | 0.531875805   | 0.710190202   | -0.178314397 | 1         | 57   |
| LZTR1       | chr22      | 21332251  | 21334250  | 0.63685967    | 0.524073375   | 0.112786296  | 2         | 58   |
| TXNDC9      | chr2       | 99956666  | 99958665  | 0.151712672   | 0.347951342   | -0.19623867  | 1         | 59   |
| B3GALT1     | chr2       | 168673682 | 168675681 | 0.471104625   | 0.661815844   | -0.190711219 | 5         | 60   |
| UGT2B10     | chr4       | 69680211  | 69682210  | 0.216353361   | 0.373730151   | -0.15737679  | 1         | 61   |
| HNRNPDP2    | chr6       | 65341076  | 65343075  | 0.56156639    | 0.756302233   | -0.194735843 | 1         | 62   |
| FHL5        | chr6       | 97008924  | 97010923  | 0.432453672   | 0.53066199    | -0.098208318 | 4         | 63   |
| CAMK1G      | chr1       | 209755562 | 209757561 | 0.480512586   | 0.619588523   | -0.139075937 | 3         | 64   |
| CDH18       | chr5       | 20575483  | 20577482  | 0.269086826   | 0.36588223    | -0.096795403 | 1         | 65   |

|             |       |           |           |             |             |              |    |     |
|-------------|-------|-----------|-----------|-------------|-------------|--------------|----|-----|
| MIR100      | chr11 | 122022517 | 122024516 | 0.359345118 | 0.562352862 | -0.203007743 | 2  | 66  |
| RNU6-502P   | chr6  | 26519187  | 26521186  | 0.366474216 | 0.246830172 | 0.119644045  | 3  | 67  |
| IGHV1OR15-1 | chr15 | 22448320  | 22450319  | 0.474835213 | 0.626281196 | -0.151445983 | 1  | 68  |
| NA          | chr19 | 53638076  | 53640075  | 0.241277551 | 0.443468976 | -0.202191425 | 1  | 69  |
| NA          | chr7  | 155753826 | 155755825 | 0.3950931   | 0.520857662 | -0.125764563 | 1  | 70  |
| RNU6-698P   | chr19 | 54155439  | 54157438  | 0.480655679 | 0.303703464 | 0.176952215  | 1  | 71  |
| SNORD58C    | chr18 | 47015179  | 47017178  | 0.407991238 | 0.537533859 | -0.12954262  | 4  | 72  |
| NA          | chr14 | 74100145  | 74102144  | 0.232718561 | 0.325841814 | -0.093123252 | 4  | 73  |
| OR6C6       | chr12 | 55688517  | 55690516  | 0.279596516 | 0.459161158 | -0.179564642 | 1  | 74  |
| NA          | chrX  | 3761399   | 3763398   | 0.362531616 | 0.215805495 | 0.146726121  | 1  | 75  |
| KRTAP6-2    | chr21 | 31970720  | 31972719  | 0.336285428 | 0.442847064 | -0.106561636 | 5  | 76  |
| NA          | chr2  | 238342966 | 238344965 | 0.4018355   | 0.507239347 | -0.105403847 | 2  | 77  |
| TNFSF11     | chr13 | 43135372  | 43137371  | 0.368692218 | 0.519482974 | -0.150790756 | 3  | 78  |
| NA          | chr18 | 77904307  | 77906306  | 0.465082461 | 0.587303642 | -0.122221181 | 12 | 79  |
| NA          | chr1  | 229576268 | 229578267 | 0.375915941 | 0.490159375 | -0.114243434 | 1  | 80  |
| SNORD115-25 | chr15 | 25459188  | 25461187  | 0.275049149 | 0.384284904 | -0.109235755 | 4  | 81  |
| NA          | chr3  | 55395358  | 55397357  | 0.702949948 | 0.497428555 | 0.205521393  | 1  | 82  |
| ALDOC       | chr17 | 26903783  | 26905782  | 0.38594715  | 0.483622594 | -0.097675444 | 11 | 83  |
| NA          | chr8  | 102218876 | 102220875 | 0.184429134 | 0.302868804 | -0.11843967  | 1  | 84  |
| GIMAP4      | chr7  | 150262865 | 150264864 | 0.384214325 | 0.512232689 | -0.128018364 | 6  | 85  |
| CYP4F22     | chr19 | 15617804  | 15619803  | 0.511350166 | 0.600366895 | -0.089016729 | 7  | 86  |
| NA          | chr2  | 740988    | 742987    | 0.513415027 | 0.602221754 | -0.088806727 | 2  | 87  |
| NA          | chr5  | 33969468  | 33971467  | 0.553880299 | 0.716126542 | -0.162246243 | 1  | 88  |
| NA          | chr19 | 22806274  | 22808273  | 0.36983669  | 0.475921573 | -0.106084882 | 3  | 89  |
| NA          | chr14 | 21341252  | 21343251  | 0.325291702 | 0.444915447 | -0.119623745 | 2  | 90  |
| NA          | chr11 | 11590131  | 11592130  | 0.576985588 | 0.769863262 | -0.192877674 | 1  | 91  |
| NA          | chr14 | 59259872  | 59261871  | 0.624617672 | 0.804906948 | -0.180289276 | 1  | 92  |
| RNU6-275P   | chr12 | 8635842   | 8637841   | 0.555654188 | 0.715863427 | -0.16020924  | 1  | 93  |
| CARD6       | chr5  | 40839786  | 40841785  | 0.178236875 | 0.269541553 | -0.091304678 | 5  | 94  |
| NA          | chr12 | 90339970  | 90341969  | 0.291570682 | 0.378136954 | -0.086566271 | 1  | 95  |
| NRBP1       | chr2  | 27649157  | 27651156  | 0.362882049 | 0.222314341 | 0.140567708  | 2  | 96  |
| NA          | chr6  | 142958527 | 142960526 | 0.54289428  | 0.456985179 | 0.085909101  | 2  | 97  |
| NA          | chr12 | 68736944  | 68738943  | 0.502478432 | 0.370437893 | 0.132040539  | 1  | 98  |
| GUCY2C      | chr12 | 14849020  | 14851019  | 0.527747665 | 0.627481811 | -0.099734147 | 4  | 99  |
| LINC00968   | chr8  | 57471883  | 57473882  | 0.226120527 | 0.310657409 | -0.084536882 | 2  | 100 |
| SMARCD3     | chr7  | 150974483 | 150976482 | 0.411091042 | 0.31552861  | 0.095562432  | 1  | 101 |
| OR1E2       | chr17 | 3336636   | 3338635   | 0.328927903 | 0.41279812  | -0.083870217 | 6  | 102 |
| NBPF22P     | chr5  | 85576778  | 85578777  | 0.591395224 | 0.746016801 | -0.154621576 | 2  | 103 |
| NA          | chr3  | 108895713 | 108897712 | 0.595310732 | 0.757763635 | -0.162452904 | 3  | 104 |
| LINC00488   | chr3  | 108895512 | 108897511 | 0.595310732 | 0.757763635 | -0.162452904 | 3  | 105 |
| NA          | chr20 | 37852892  | 37854891  | 0.684248552 | 0.565064368 | 0.119184184  | 3  | 106 |
| NA          | chr1  | 34333054  | 34335053  | 0.556035338 | 0.69192777  | -0.135892433 | 2  | 107 |
| NA          | chr5  | 166720779 | 166722778 | 0.452100154 | 0.25704739  | 0.195052764  | 1  | 108 |
| NA          | chr4  | 92033442  | 92035441  | 0.808893952 | 0.638613114 | 0.170280838  | 1  | 109 |
| NA          | chr7  | 53879125  | 53881124  | 0.513448487 | 0.631145314 | -0.117696828 | 4  | 110 |
| BCMO1       | chr16 | 81270553  | 81272552  | 0.23445121  | 0.322102145 | -0.087650935 | 5  | 111 |
| OR52E6      | chr11 | 5862683   | 5864682   | 0.484743546 | 0.787624802 | -0.302881256 | 1  | 112 |
| NA          | chr10 | 92212427  | 92214426  | 0.590807767 | 0.691873977 | -0.10106621  | 2  | 113 |
| NA          | chr6  | 134757354 | 134759353 | 0.451960203 | 0.589824288 | -0.137864085 | 2  | 114 |
| ST6GALNAC2  | chr17 | 74582539  | 74584538  | 0.399030109 | 0.509828026 | -0.110797917 | 2  | 115 |
| NA          | chr18 | 73966670  | 73968669  | 0.395404218 | 0.498963689 | -0.103559471 | 1  | 116 |
| LHFPL3-AS1  | chr7  | 104444055 | 104446054 | 0.534945616 | 0.6784219   | -0.143476284 | 4  | 117 |
| NA          | chr11 | 119579130 | 119581129 | 0.29977871  | 0.380302678 | -0.080523968 | 1  | 118 |
| NAV2-IT1    | chr11 | 19400531  | 19402530  | 0.647664357 | 0.814213954 | -0.166549597 | 1  | 119 |
| NA          | chr2  | 47571714  | 47573713  | 0.12534668  | 0.292926715 | -0.167580035 | 1  | 120 |
| NA          | chr3  | 193963937 | 193965936 | 0.573846687 | 0.792766527 | -0.21891984  | 1  | 121 |
| PF4V1       | chr4  | 74717406  | 74719405  | 0.423134404 | 0.571165595 | -0.148031191 | 6  | 122 |
| NA          | chr12 | 124996268 | 124998267 | 0.296256908 | 0.375466386 | -0.079209478 | 1  | 123 |
| NA          | chr3  | 61724404  | 61726403  | 0.437069778 | 0.5491264   | -0.112056621 | 1  | 124 |
| NA          | chr12 | 124490273 | 124492272 | 0.565520557 | 0.447614916 | 0.11790564   | 1  | 125 |
| LY6H        | chr8  | 144241629 | 144243628 | 0.470070525 | 0.382065371 | 0.088005154  | 7  | 126 |
| RNU6-1309P  | chr1  | 150784675 | 150786674 | 0.272085197 | 0.364069083 | -0.091983886 | 1  | 127 |
| MAPK15      | chr8  | 144796929 | 144798928 | 0.522963163 | 0.600589664 | -0.077626502 | 14 | 128 |
| NA          | chr17 | 32581807  | 32583806  | 0.365834258 | 0.445321932 | -0.079487674 | 6  | 129 |
| NA          | chr1  | 68507513  | 68509512  | 0.574180225 | 0.710126159 | -0.135945934 | 2  | 130 |
| NA          | chr16 | 68679572  | 68681571  | 0.62531044  | 0.721635912 | -0.096325472 | 3  | 131 |
| LCE4A       | chr1  | 152679136 | 152681135 | 0.397084391 | 0.494880264 | -0.097795873 | 2  | 132 |
| OR52K2      | chr11 | 4469025   | 4471024   | 0.295143496 | 0.411961143 | -0.116817647 | 3  | 133 |

|             |       |           |           |             |             |              |    |     |
|-------------|-------|-----------|-----------|-------------|-------------|--------------|----|-----|
| NA          | chr3  | 150620682 | 150622681 | 0.335654734 | 0.476261103 | -0.140606369 | 1  | 134 |
| OR4N5       | chr14 | 20610395  | 20612394  | 0.431979611 | 0.609457279 | -0.177477667 | 3  | 135 |
| RNA5SP107   | chr2  | 155445419 | 155447418 | 0.301175913 | 0.553285895 | -0.252109982 | 1  | 136 |
| SPANXA1     | chrX  | 140672634 | 140674633 | 0.377170654 | 0.604684169 | -0.227513514 | 1  | 137 |
| NA          | chr15 | 92715167  | 92717166  | 0.793757859 | 0.639101865 | 0.154655994  | 1  | 138 |
| MIR526A1    | chr19 | 54208006  | 54210005  | 0.164730672 | 0.265655612 | -0.10092494  | 4  | 139 |
| NA          | chr3  | 196261903 | 196263902 | 0.366378213 | 0.454533684 | -0.088155471 | 1  | 140 |
| RAB39B      | chrX  | 154493375 | 154495374 | 0.478239724 | 0.563470944 | -0.08523122  | 5  | 141 |
| KIAA0947    | chr5  | 5419277   | 5421276   | 0.642408992 | 0.728985494 | -0.086576503 | 2  | 142 |
| RPSAP52     | chr12 | 66220255  | 66222254  | 0.397475453 | 0.494113445 | -0.096637992 | 3  | 143 |
| NA          | chr8  | 39770248  | 39772247  | 0.51776983  | 0.606930985 | -0.089161154 | 2  | 144 |
| HSD11B2     | chr16 | 67463055  | 67465054  | 0.233430853 | 0.160971697 | 0.072459156  | 8  | 145 |
| NA          | chr9  | 15053555  | 15055554  | 0.407961836 | 0.504051365 | -0.096089528 | 1  | 146 |
| KRTAP10-8   | chr21 | 46030496  | 46032495  | 0.526353136 | 0.610052923 | -0.083699786 | 4  | 147 |
| NA          | chr14 | 91162177  | 91164176  | 0.117602702 | 0.231472622 | -0.113869921 | 1  | 148 |
| NA          | chr16 | 33298061  | 33300060  | 0.541401916 | 0.66738507  | -0.125983154 | 1  | 149 |
| TNFAIP8L2   | chr1  | 151127605 | 151129604 | 0.596380946 | 0.668133561 | -0.071752616 | 6  | 150 |
| SCNM1       | chr1  | 151127640 | 151129639 | 0.596380946 | 0.668133561 | -0.071752616 | 6  | 151 |
| TRIML1      | chr4  | 189059073 | 189061072 | 0.38867281  | 0.494914802 | -0.106241992 | 6  | 152 |
| CNN3P1      | chr6  | 6533430   | 6535429   | 0.54740114  | 0.621201095 | -0.073799954 | 2  | 153 |
| NA          | chr13 | 61489676  | 61491675  | 0.463872997 | 0.563193854 | -0.099320857 | 3  | 154 |
| NA          | chr8  | 74268197  | 74270196  | 0.451013456 | 0.57271908  | -0.121705624 | 1  | 155 |
| FAM27E2     | chr9  | 45732059  | 45734058  | 0.586671306 | 0.47688265  | 0.109788656  | 1  | 156 |
| HBG2        | chr11 | 5666520   | 5668519   | 0.534077221 | 0.330402253 | 0.203674969  | 2  | 157 |
| MAGEB3      | chrX  | 30247053  | 30249052  | 0.344510353 | 0.476251332 | -0.131740979 | 5  | 158 |
| OR2L3       | chr1  | 248222484 | 248224483 | 0.30883153  | 0.47607148  | -0.16723995  | 1  | 159 |
| NA          | chr6  | 73971231  | 73973230  | 0.127003522 | 0.224609323 | -0.0976058   | 10 | 160 |
| NA          | chr6  | 73971438  | 73973437  | 0.127003522 | 0.224609323 | -0.0976058   | 10 | 161 |
| RNU6-835P   | chr14 | 88462293  | 88464292  | 0.434682969 | 0.636897619 | -0.20221465  | 1  | 162 |
| PRAMEF11    | chr1  | 12890765  | 12892764  | 0.317562739 | 0.391446633 | -0.073883894 | 2  | 163 |
| NA          | chr12 | 97669488  | 97671487  | 0.381783129 | 0.186852783 | 0.194930346  | 1  | 164 |
| SNORD87     | chr8  | 67834287  | 67836286  | 0.561956039 | 0.662640791 | -0.100684752 | 5  | 165 |
| CRYAB       | chr11 | 111793947 | 111795946 | 0.525569409 | 0.643700683 | -0.118131274 | 1  | 166 |
| NA          | chr2  | 91923252  | 91925251  | 0.524326125 | 0.651842633 | -0.127516508 | 1  | 167 |
| TJAP1       | chr6  | 43443761  | 43445760  | 0.098272765 | 0.16791979  | -0.069647025 | 4  | 168 |
| LAYN        | chr11 | 111409505 | 111411504 | 0.561955928 | 0.631484298 | -0.06952837  | 10 | 169 |
| NA          | chr14 | 99727785  | 99729784  | 0.120390299 | 0.189737891 | -0.069347592 | 3  | 170 |
| MTND1P28    | chr2  | 117779994 | 117781993 | 0.449262381 | 0.560858029 | -0.111595648 | 1  | 171 |
| MIR550A3    | chr7  | 29719945  | 29721944  | 0.424072643 | 0.539143825 | -0.115071182 | 1  | 172 |
| OLFML2A     | chr9  | 127537937 | 127539936 | 0.574841387 | 0.493986622 | 0.080854765  | 3  | 173 |
| S100A7L2    | chr1  | 153411926 | 153413925 | 0.351121089 | 0.419650669 | -0.06852958  | 2  | 174 |
| KRT38       | chr17 | 39596674  | 39598673  | 0.529833647 | 0.631351503 | -0.101517856 | 5  | 175 |
| OR1J4       | chr9  | 125279920 | 125281919 | 0.116809372 | 0.197422216 | -0.080612844 | 1  | 176 |
| BZW1        | chr2  | 201673817 | 201675816 | 0.411285719 | 0.501285554 | -0.089999834 | 1  | 177 |
| NA          | chr6  | 73972420  | 73974419  | 0.200775067 | 0.292923026 | -0.092147959 | 10 | 178 |
| OR2W1       | chr6  | 29012518  | 29014517  | 0.51956738  | 0.606199244 | -0.086631863 | 4  | 179 |
| SNX2P2      | chr7  | 31979374  | 31981373  | 0.19160047  | 0.37951284  | -0.18791237  | 1  | 180 |
| TRIML2      | chr4  | 189030258 | 189032257 | 0.21059265  | 0.362910086 | -0.152317436 | 1  | 181 |
| STAC2       | chr17 | 37381626  | 37383625  | 0.372307758 | 0.439943887 | -0.06763613  | 10 | 182 |
| GLIS1       | chr1  | 54199378  | 54201377  | 0.560007379 | 0.654659916 | -0.094652537 | 6  | 183 |
| DLGAP2      | chr8  | 1448032   | 1450031   | 0.57100093  | 0.674274685 | -0.103273755 | 11 | 184 |
| CCL2        | chr17 | 32580804  | 32582803  | 0.517518218 | 0.584865139 | -0.067346921 | 9  | 185 |
| SNORD115-41 | chr15 | 25489125  | 25491124  | 0.497072971 | 0.584169963 | -0.087096992 | 6  | 186 |
| MIR514A1    | chrX  | 146360363 | 146362362 | 0.739708236 | 0.896984396 | -0.15727616  | 1  | 187 |
| TRIM77      | chr11 | 89441967  | 89443966  | 0.582454464 | 0.694532002 | -0.112077538 | 2  | 188 |
| NTF6A       | chr19 | 49528778  | 49530777  | 0.633939102 | 0.52279486  | 0.111144241  | 1  | 189 |
| NA          | chr6  | 30482543  | 30484542  | 0.749004622 | 0.653440992 | 0.09556363   | 12 | 190 |
| RGS6        | chr14 | 72397656  | 72399655  | 0.201144765 | 0.123447644 | 0.077697121  | 5  | 191 |
| MID2        | chrX  | 107067485 | 107069484 | 0.425783003 | 0.501172508 | -0.075389505 | 7  | 192 |
| KRTAP19-3   | chr21 | 31863776  | 31865775  | 0.472173592 | 0.574395157 | -0.102221565 | 4  | 193 |
| NA          | chr5  | 138610369 | 138612368 | 0.254901348 | 0.320940363 | -0.066039015 | 1  | 194 |
| PSMA2P2     | chr8  | 94954606  | 94956605  | 0.669153193 | 0.809669149 | -0.140515957 | 1  | 195 |
| NA          | chr2  | 216409750 | 216411749 | 0.895167921 | 0.740566051 | 0.15460187   | 1  | 196 |
| RXRG        | chr1  | 165413934 | 165415933 | 0.38700662  | 0.469583711 | -0.082577091 | 13 | 197 |
| NA          | chr4  | 49550373  | 49552372  | 0.671856203 | 0.555620547 | 0.116235656  | 1  | 198 |
| NA          | chr4  | 49550953  | 49552952  | 0.671856203 | 0.555620547 | 0.116235656  | 1  | 199 |
| NA          | chr4  | 49550549  | 49552548  | 0.671856203 | 0.555620547 | 0.116235656  | 1  | 200 |
| NA          | chr19 | 52021485  | 52023484  | 0.186372343 | 0.283805902 | -0.097433559 | 1  | 201 |

|             |       |           |           |             |             |              |    |     |
|-------------|-------|-----------|-----------|-------------|-------------|--------------|----|-----|
| NA          | chr5  | 75372991  | 75374990  | 0.673719178 | 0.501292151 | 0.172427027  | 1  | 202 |
| IL7R        | chr5  | 35851297  | 35853296  | 0.396545246 | 0.611473914 | -0.214928669 | 1  | 203 |
| NA          | chr1  | 209539507 | 209541506 | 0.648006348 | 0.781803948 | -0.1337976   | 1  | 204 |
| COX6B2      | chr19 | 55865683  | 55867682  | 0.381588895 | 0.450391158 | -0.068802263 | 13 | 205 |
| POU6F2-AS2  | chr7  | 39052652  | 39054651  | 0.771956951 | 0.594183307 | 0.177773644  | 1  | 206 |
| NA          | chr12 | 76422774  | 76424773  | 0.340432535 | 0.439844637 | -0.099412102 | 2  | 207 |
| NA          | chr2  | 155314869 | 155316868 | 0.651488072 | 0.785467989 | -0.133979917 | 1  | 208 |
| NA          | chr2  | 75749694  | 75751693  | 0.729920964 | 0.879153479 | -0.149232516 | 1  | 209 |
| NA          | chr1  | 9262179   | 9264178   | 0.215133823 | 0.14830183  | 0.066831993  | 1  | 210 |
| NA          | chr16 | 34258122  | 34260121  | 0.220976969 | 0.285325425 | -0.064348456 | 1  | 211 |
| ENOSF1      | chr18 | 712177    | 714176    | 0.37310646  | 0.437333395 | -0.064226936 | 7  | 212 |
| IGHV3-21    | chr14 | 106691704 | 106693703 | 0.321339923 | 0.488395218 | -0.167055295 | 1  | 213 |
| NA          | chr5  | 944930    | 946929    | 0.253019273 | 0.188874776 | 0.064144497  | 1  | 214 |
| PRSS58      | chr7  | 141957379 | 141959378 | 0.658132872 | 0.791294098 | -0.133161226 | 1  | 215 |
| ACTL6B      | chr7  | 100253585 | 100255584 | 0.532172313 | 0.595977399 | -0.063805086 | 8  | 216 |
| SDR16C6P    | chr8  | 57307425  | 57309424  | 0.32265367  | 0.462957688 | -0.140304018 | 4  | 217 |
| ARHGAP40    | chr20 | 37229077  | 37231076  | 0.388537505 | 0.461640204 | -0.073102699 | 9  | 218 |
| ALDH1L1-AS2 | chr3  | 125897408 | 125899407 | 0.114298562 | 0.177956109 | -0.063657547 | 7  | 219 |
| LPCAT2      | chr16 | 55541410  | 55543409  | 0.43626969  | 0.499875416 | -0.063605726 | 9  | 220 |
| RN7SL805P   | chr17 | 61915843  | 61917842  | 0.39323438  | 0.476962616 | -0.083728237 | 1  | 221 |
| KRTAP23-1   | chr21 | 31720425  | 31722424  | 0.318169033 | 0.385543908 | -0.067374874 | 3  | 222 |
| C1orf172    | chr1  | 27286398  | 27288397  | 0.530252016 | 0.593764694 | -0.063512678 | 10 | 223 |
| GIMAP2      | chr7  | 150381285 | 150383284 | 0.494302348 | 0.583772445 | -0.089470098 | 2  | 224 |
| MROH9       | chr1  | 170903112 | 170905111 | 0.606929122 | 0.729308445 | -0.122379323 | 1  | 225 |
| C4orf26     | chr4  | 76479758  | 76481757  | 0.695820291 | 0.791414858 | -0.095594566 | 6  | 226 |
| OR1A1       | chr17 | 3117415   | 3119414   | 0.369884524 | 0.469793677 | -0.099909154 | 5  | 227 |
| FAM120C     | chrX  | 54209215  | 54211214  | 0.444878669 | 0.533663667 | -0.088784998 | 8  | 228 |
| NA          | chr12 | 130905065 | 130907064 | 0.538013708 | 0.630860031 | -0.092846323 | 4  | 229 |
| ESM1        | chr5  | 54318000  | 54319999  | 0.696307032 | 0.596487744 | 0.099819288  | 2  | 230 |
| GZMK        | chr5  | 54318581  | 54320580  | 0.696307032 | 0.596487744 | 0.099819288  | 2  | 231 |
| OR11H12     | chr14 | 19376022  | 19378021  | 0.236788232 | 0.299572596 | -0.062784364 | 1  | 232 |
| OR4K5       | chr14 | 20387241  | 20389240  | 0.365631083 | 0.444603992 | -0.07897291  | 2  | 233 |
| NA          | chr1  | 13838215  | 13840214  | 0.405768223 | 0.46803731  | -0.062269087 | 4  | 234 |
| NA          | chr11 | 131532978 | 131534977 | 0.760888747 | 0.910511657 | -0.14962291  | 1  | 235 |
| LINC00442   | chr13 | 19580899  | 19582898  | 0.561441974 | 0.647638732 | -0.086196758 | 2  | 236 |
| NA          | chr16 | 10671541  | 10673540  | 0.628418114 | 0.70507028  | -0.076652166 | 2  | 237 |
| CACNA1A     | chr19 | 13734305  | 13736304  | 0.686744069 | 0.768971884 | -0.082227814 | 3  | 238 |
| NA          | chr16 | 75549679  | 75551678  | 0.219326276 | 0.281240177 | -0.0619139   | 6  | 239 |
| NA          | chr2  | 105029967 | 105031966 | 0.183824633 | 0.24539149  | -0.061566857 | 1  | 240 |
| NA          | chr1  | 170252850 | 170254849 | 0.686607306 | 0.770279105 | -0.0836718   | 5  | 241 |
| SYCP2       | chr20 | 58508211  | 58510210  | 0.51725544  | 0.578784299 | -0.061528859 | 7  | 242 |
| NA          | chr10 | 91598592  | 91600591  | 0.653627222 | 0.780599912 | -0.12697269  | 1  | 243 |
| LRAT        | chr4  | 155546597 | 155548596 | 0.538414712 | 0.599761928 | -0.061347216 | 8  | 244 |
| KIR2DL3     | chr19 | 55248480  | 55250479  | 0.439492439 | 0.511319747 | -0.071827307 | 5  | 245 |
| NA          | chrX  | 45710421  | 45712420  | 0.268681836 | 0.356985477 | -0.088303641 | 3  | 246 |
| SNTN        | chr3  | 63636844  | 63638843  | 0.710474923 | 0.817284063 | -0.10680914  | 4  | 247 |
| HEMGN       | chr9  | 100706639 | 100708638 | 0.648951115 | 0.773909001 | -0.124957885 | 1  | 248 |
| PGM5P2      | chr9  | 69147355  | 69149354  | 0.527603808 | 0.625501695 | -0.097897887 | 2  | 249 |
| NA          | chr5  | 139535404 | 139537403 | 0.58467599  | 0.49020418  | 0.094471811  | 2  | 250 |
| NA          | chr12 | 62995032  | 62997031  | 0.494048499 | 0.389068601 | 0.104979898  | 2  | 251 |
| SNORD115-19 | chr15 | 25448004  | 25450003  | 0.374580346 | 0.470931523 | -0.096351176 | 9  | 252 |
| CLK4        | chr5  | 178057117 | 178059116 | 0.299650968 | 0.224587279 | 0.075063689  | 1  | 253 |
| ACPL2       | chr3  | 140946068 | 140948067 | 0.698353668 | 0.831102413 | -0.132748744 | 1  | 254 |
| FAM131B     | chr7  | 143059364 | 143061363 | 0.479457892 | 0.539345983 | -0.059888091 | 6  | 255 |
| NA          | chr19 | 46266543  | 46268542  | 0.718217405 | 0.603301164 | 0.114916242  | 1  | 256 |
| GGCT        | chr7  | 30590596  | 30592595  | 0.468707162 | 0.558132768 | -0.089425606 | 1  | 257 |
| NA          | chr7  | 30589898  | 30591897  | 0.468707162 | 0.558132768 | -0.089425606 | 1  | 258 |
| NA          | chr7  | 67554710  | 67556709  | 0.526028419 | 0.634705261 | -0.108676842 | 1  | 259 |
| NA          | chrX  | 27763513  | 27765512  | 0.357621881 | 0.422180904 | -0.064559023 | 5  | 260 |
| CCIN        | chr9  | 36167889  | 36169888  | 0.73420641  | 0.84019418  | -0.10598777  | 2  | 261 |
| LINC00152   | chr2  | 87753387  | 87755386  | 0.090986619 | 0.149973451 | -0.058986831 | 1  | 262 |
| SIN3B       | chr19 | 16938711  | 16940710  | 0.104315301 | 0.167682949 | -0.063367648 | 4  | 263 |
| NA          | chr16 | 58314093  | 58316092  | 0.749038203 | 0.610472609 | 0.138565594  | 1  | 264 |
| OR6B1       | chr7  | 143699522 | 143701521 | 0.478277757 | 0.541852251 | -0.063574493 | 6  | 265 |
| RPS26P49    | chr14 | 105297009 | 105299008 | 0.300035372 | 0.192829986 | 0.107205386  | 1  | 266 |
| NA          | chr4  | 189026212 | 189028211 | 0.673309039 | 0.784854978 | -0.111545939 | 6  | 267 |
| SCG2        | chr2  | 224466722 | 224468721 | 0.158936307 | 0.234421385 | -0.075485077 | 4  | 268 |
| CC2D2A      | chr4  | 15469989  | 15471988  | 0.307482056 | 0.386375768 | -0.078893712 | 6  | 269 |

|             |       |           |           |             |             |              |    |     |
|-------------|-------|-----------|-----------|-------------|-------------|--------------|----|-----|
| NA          | chr17 | 21363028  | 21365027  | 0.384901372 | 0.456811877 | -0.071910506 | 1  | 270 |
| MYD88       | chr3  | 38178469  | 38180468  | 0.367254643 | 0.453860153 | -0.086605511 | 14 | 271 |
| RN7SKP54    | chr7  | 100700080 | 100702079 | 0.193211559 | 0.312862128 | -0.119650569 | 1  | 272 |
| NA          | chr5  | 70739943  | 70741942  | 0.102323942 | 0.160289687 | -0.057965745 | 1  | 273 |
| ARMCX2      | chrX  | 100914377 | 100916376 | 0.557731594 | 0.615563041 | -0.057831447 | 10 | 274 |
| SNORD115-36 | chr15 | 25479732  | 25481731  | 0.217189478 | 0.336824622 | -0.119635144 | 6  | 275 |
| RETNLB      | chr3  | 108475732 | 108477731 | 0.498784852 | 0.577811597 | -0.079026746 | 6  | 276 |
| OXCT1-AS1   | chr5  | 41868632  | 41870631  | 0.348685933 | 0.429851088 | -0.081165155 | 4  | 277 |
| NA          | chr20 | 61989840  | 61991839  | 0.805772744 | 0.68118748  | 0.124585264  | 1  | 278 |
| MAPK3       | chr16 | 30134328  | 30136327  | 0.224722753 | 0.282391534 | -0.057668781 | 6  | 279 |
| TMEM31      | chrX  | 102964337 | 102966336 | 0.584487021 | 0.667176434 | -0.082689412 | 2  | 280 |
| SNORD93     | chr7  | 22894732  | 22896731  | 0.518907631 | 0.576423    | -0.057515369 | 5  | 281 |
| RASSF10     | chr11 | 13029196  | 13031195  | 0.541423792 | 0.647643909 | -0.106220117 | 11 | 282 |
| NA          | chr16 | 63762681  | 63764680  | 0.315174906 | 0.373263635 | -0.058088729 | 1  | 283 |
| MPZL2       | chr11 | 118134752 | 118136751 | 0.259888659 | 0.317055753 | -0.057167094 | 11 | 284 |
| SNORD115-44 | chr15 | 25494506  | 25496505  | 0.239841659 | 0.317842466 | -0.078000807 | 3  | 285 |
| NA          | chr3  | 158498836 | 158500835 | 0.307859169 | 0.412842982 | -0.104983813 | 1  | 286 |
| ALDH1L2     | chr12 | 105477856 | 105479855 | 0.64340531  | 0.728004041 | -0.084598731 | 11 | 287 |
| NA          | chr2  | 217214626 | 217216625 | 0.576822621 | 0.681022936 | -0.104200315 | 1  | 288 |
| SERPINA6    | chr14 | 94789232  | 94791231  | 0.620981829 | 0.719315361 | -0.098333532 | 5  | 289 |
| IDO2        | chr8  | 39790633  | 39792632  | 0.361175552 | 0.426137822 | -0.06496227  | 4  | 290 |
| PATE3       | chr11 | 125656506 | 125658505 | 0.332331022 | 0.426877376 | -0.094546355 | 5  | 291 |
| NA          | chr10 | 91716631  | 91718630  | 0.347718068 | 0.471689283 | -0.123971215 | 1  | 292 |
| CIRH1A      | chr16 | 69163694  | 69165693  | 0.546355042 | 0.644709125 | -0.098354082 | 1  | 293 |
| LDB2        | chr4  | 16899933  | 16901932  | 0.382025856 | 0.469240415 | -0.087214559 | 5  | 294 |
| LCE6A       | chr1  | 152813844 | 152815843 | 0.345066455 | 0.424753912 | -0.079687457 | 7  | 295 |
| NA          | chr14 | 23024034  | 23026033  | 0.092776749 | 0.149016142 | -0.056239393 | 1  | 296 |
| MTND1P4     | chr7  | 57251995  | 57253994  | 0.155132398 | 0.230511268 | -0.07537887  | 1  | 297 |
| SNORD109A   | chr15 | 25285565  | 25287564  | 0.451932416 | 0.377178802 | 0.074753614  | 3  | 298 |
| CYB5AP5     | chr14 | 26675742  | 26677741  | 0.297339023 | 0.428474543 | -0.131135521 | 1  | 299 |
| BCKDHA      | chr19 | 41855258  | 41857257  | 0.398388059 | 0.454334366 | -0.055946307 | 2  | 300 |
| TMEM91      | chr19 | 41855316  | 41857315  | 0.398388059 | 0.454334366 | -0.055946307 | 2  | 301 |
| HERC3       | chr4  | 89440699  | 89442698  | 0.848015819 | 0.732757    | 0.115258819  | 2  | 302 |
| KRTAP19-1   | chr21 | 31852164  | 31854163  | 0.234555907 | 0.31766796  | -0.083112054 | 2  | 303 |
| ADH7        | chr4  | 100356395 | 100358394 | 0.275630772 | 0.476977231 | -0.201346459 | 2  | 304 |
| NA          | chr1  | 204098690 | 204100689 | 0.439462819 | 0.517885296 | -0.078422477 | 1  | 305 |
| CREB3L3     | chr19 | 4152098   | 4154097   | 0.380620681 | 0.450885244 | -0.070264563 | 7  | 306 |
| ELP3        | chr8  | 27945690  | 27947689  | 0.862795063 | 0.733560987 | 0.129234076  | 1  | 307 |
| SMIM20      | chr4  | 25861952  | 25863951  | 0.121255356 | 0.176853773 | -0.055598417 | 1  | 308 |
| CREB5       | chr7  | 28337440  | 28339439  | 0.487486998 | 0.550131926 | -0.062644928 | 6  | 309 |
| TRPV6       | chr7  | 142583008 | 142585007 | 0.563999375 | 0.654997344 | -0.090997969 | 6  | 310 |
| LINC00922   | chr16 | 65609704  | 65611703  | 0.278601913 | 0.391365621 | -0.112763708 | 3  | 311 |
| EEF1G       | chr11 | 62341902  | 62343901  | 0.455468399 | 0.525494553 | -0.070026154 | 5  | 312 |
| NA          | chr14 | 58095059  | 58097058  | 0.69671555  | 0.818784611 | -0.12206906  | 1  | 313 |
| CDA         | chr1  | 20913941  | 20915940  | 0.565380711 | 0.659538893 | -0.094158182 | 4  | 314 |
| RN7SKP78    | chr10 | 6190086   | 6192085   | 0.538118805 | 0.632576045 | -0.09445724  | 1  | 315 |
| OR1E1       | chr17 | 3301205   | 3303204   | 0.109574644 | 0.164699192 | -0.055124548 | 2  | 316 |
| SPTBN1      | chr2  | 54681922  | 54683921  | 0.122203665 | 0.177279257 | -0.055075593 | 10 | 317 |
| DOK7        | chr4  | 3463533   | 3465532   | 0.471055401 | 0.548305757 | -0.077250356 | 11 | 318 |
| NA          | chr22 | 40354901  | 40356900  | 0.70609774  | 0.828935736 | -0.122837996 | 1  | 319 |
| NA          | chr7  | 57895458  | 57897457  | 0.321915644 | 0.426776967 | -0.104861323 | 1  | 320 |
| MX1         | chr21 | 42790731  | 42792730  | 0.421464493 | 0.493044114 | -0.071579621 | 8  | 321 |
| SNORD115-40 | chr15 | 25487261  | 25489260  | 0.256848449 | 0.358167395 | -0.101318946 | 6  | 322 |
| MYADM       | chr19 | 54367977  | 54369976  | 0.542498667 | 0.59733302  | -0.054834354 | 11 | 323 |
| TMEM151A    | chr11 | 66057841  | 66059840  | 0.363077204 | 0.417892711 | -0.054815506 | 7  | 324 |
| REGG        | chr12 | 15501110  | 15503109  | 0.725548271 | 0.850688987 | -0.125140716 | 1  | 325 |
| MIR301A     | chr17 | 57228083  | 57230082  | 0.453667949 | 0.514855719 | -0.06118777  | 4  | 326 |
| NA          | chr19 | 51842449  | 51844448  | 0.335617341 | 0.229142858 | 0.106474483  | 2  | 327 |
| CCK         | chr3  | 42307200  | 42309199  | 0.70524136  | 0.768785288 | -0.063543928 | 4  | 328 |
| NA          | chr5  | 38782182  | 38784181  | 0.280479647 | 0.368830628 | -0.088350981 | 1  | 329 |
| INPP1       | chr2  | 191206696 | 191208695 | 0.620170888 | 0.696936298 | -0.076765409 | 8  | 330 |
| NA          | chr1  | 3999173   | 4001172   | 0.286685454 | 0.3787972   | -0.092111746 | 3  | 331 |
| NA          | chr19 | 46733146  | 46735145  | 0.660803758 | 0.574130607 | 0.086673151  | 2  | 332 |
| GNAO1       | chr16 | 56223802  | 56225801  | 0.129344631 | 0.201925312 | -0.072580681 | 9  | 333 |
| NA          | chr1  | 115640793 | 115642792 | 0.31045916  | 0.395473583 | -0.085014423 | 1  | 334 |
| FAM84A      | chr2  | 14771310  | 14773309  | 0.458735639 | 0.390440343 | 0.068295295  | 9  | 335 |
| RAB3IP      | chr12 | 70130961  | 70132960  | 0.277869549 | 0.331965929 | -0.05409638  | 5  | 336 |
| ZFH3        | chr16 | 73093098  | 73095097  | 0.263440585 | 0.324009146 | -0.060568561 | 2  | 337 |



|             |       |           |           |             |             |              |    |     |
|-------------|-------|-----------|-----------|-------------|-------------|--------------|----|-----|
| NA          | chr16 | 73092869  | 73094868  | 0.263440585 | 0.324009146 | -0.060568561 | 2  | 338 |
| NA          | chr7  | 3125556   | 3127555   | 0.796625879 | 0.932022829 | -0.13539695  | 1  | 339 |
| ACTBL2      | chr5  | 56778137  | 56780136  | 0.754172834 | 0.659901514 | 0.09427132   | 3  | 340 |
| MIR720      | chr3  | 164057629 | 164059628 | 0.654922097 | 0.741405866 | -0.086483769 | 3  | 341 |
| MORF4L2     | chrX  | 102942587 | 102944586 | 0.433627443 | 0.502277229 | -0.068649786 | 3  | 342 |
| KRT18P42    | chr5  | 108922539 | 108924538 | 0.661753511 | 0.774130354 | -0.112376843 | 1  | 343 |
| GPR22       | chr7  | 107108963 | 107110962 | 0.656727872 | 0.780296505 | -0.123568633 | 1  | 344 |
| NA          | chr2  | 170645103 | 170647102 | 0.053027699 | 0.168807713 | -0.115780014 | 1  | 345 |
| SERPINA12   | chr14 | 94983682  | 94985681  | 0.670929013 | 0.759312621 | -0.088383608 | 5  | 346 |
| NA          | chr3  | 47291617  | 47293616  | 0.507231353 | 0.338504711 | 0.168726641  | 1  | 347 |
| RNU6-871P   | chr12 | 59844054  | 59846053  | 0.291973039 | 0.345505494 | -0.053532455 | 1  | 348 |
| ASAP1       | chr8  | 131455407 | 131457406 | 0.181190958 | 0.234711813 | -0.053520854 | 3  | 349 |
| NA          | chr4  | 147925144 | 147927143 | 0.769763106 | 0.899185024 | -0.129421918 | 1  | 350 |
| MIR147A     | chr9  | 123006829 | 123008828 | 0.314952359 | 0.465040388 | -0.150088029 | 2  | 351 |
| OR1S2       | chr11 | 57971154  | 57973153  | 0.417016468 | 0.533060398 | -0.11604393  | 3  | 352 |
| NA          | chr1  | 48152635  | 48154634  | 0.520623692 | 0.608466096 | -0.087842404 | 1  | 353 |
| NA          | chr11 | 67140556  | 67142555  | 0.344514652 | 0.397781875 | -0.053267222 | 14 | 354 |
| GPX1P2      | chr21 | 28515769  | 28517768  | 0.424179201 | 0.506073885 | -0.081894684 | 3  | 355 |
| NA          | chr9  | 68725129  | 68727128  | 0.289773257 | 0.354112594 | -0.064339337 | 1  | 356 |
| NA          | chrX  | 153746456 | 153748455 | 0.94150185  | 0.806857407 | 0.134644443  | 1  | 357 |
| NA          | chr3  | 158288356 | 158290355 | 0.221468722 | 0.168453094 | 0.053015627  | 12 | 358 |
| MLF1        | chr3  | 158287452 | 158289451 | 0.221468722 | 0.168453094 | 0.053015627  | 12 | 359 |
| SEPT10P1    | chr8  | 57390047  | 57392046  | 0.483497753 | 0.634491479 | -0.150993726 | 1  | 360 |
| KNG1        | chr3  | 186433565 | 186435564 | 0.713800356 | 0.652376227 | 0.061424129  | 3  | 361 |
| NA          | chr2  | 239627465 | 239629464 | 0.316757052 | 0.239427537 | 0.077329514  | 2  | 362 |
| KCNK3       | chr2  | 26914119  | 26916118  | 0.353196969 | 0.42100341  | -0.067806441 | 5  | 363 |
| HIATL1      | chr9  | 97135333  | 97137332  | 0.126050476 | 0.214182462 | -0.088131986 | 3  | 364 |
| SNORD115-18 | chr15 | 25446874  | 25448873  | 0.297636202 | 0.402758196 | -0.105121994 | 6  | 365 |
| NA          | chr2  | 105048225 | 105050224 | 0.73237729  | 0.853940704 | -0.121563415 | 1  | 366 |
| TINAG       | chr6  | 54171157  | 54173156  | 0.71859986  | 0.618917294 | 0.099682567  | 3  | 367 |
| SNORD115-43 | chr15 | 25492845  | 25494844  | 0.349936315 | 0.426304896 | -0.076368581 | 5  | 368 |
| GPX8        | chr5  | 54454446  | 54456445  | 0.295801104 | 0.348349919 | -0.052548815 | 5  | 369 |
| SYTL1       | chr1  | 27667013  | 27669012  | 0.401682955 | 0.454068452 | -0.052385497 | 8  | 370 |
| NA          | chr7  | 113089627 | 113091626 | 0.544891649 | 0.597235032 | -0.052343383 | 2  | 371 |
| COX20P2     | chr2  | 231820808 | 231822807 | 0.142533866 | 0.218190525 | -0.075656658 | 2  | 372 |
| OR5P3       | chr11 | 7847020   | 7849019   | 0.627863584 | 0.704830651 | -0.076967067 | 4  | 373 |
| ZNF208      | chr19 | 22193252  | 22195251  | 0.341895693 | 0.41019319  | -0.068297498 | 7  | 374 |
| NA          | chr3  | 142677714 | 142679713 | 0.808787115 | 0.940767772 | -0.131980657 | 1  | 375 |
| PRAMEF12    | chr1  | 12833484  | 12835483  | 0.58766173  | 0.667948341 | -0.08028661  | 3  | 376 |
| NA          | chr4  | 189658006 | 189660005 | 0.701247271 | 0.810284089 | -0.109036818 | 2  | 377 |
| FAM225B     | chr9  | 115873281 | 115875280 | 0.276173231 | 0.396963082 | -0.120789851 | 2  | 378 |
| FAM225A     | chr9  | 115873853 | 115875852 | 0.276173231 | 0.396963082 | -0.120789851 | 2  | 379 |
| DUXAP3      | chr10 | 43243636  | 43245635  | 0.177435547 | 0.229472795 | -0.052037248 | 1  | 380 |
| OR52I2      | chr11 | 4606521   | 4608520   | 0.565269403 | 0.618890237 | -0.053620835 | 3  | 381 |
| NA          | chr22 | 32599602  | 32601601  | 0.526461474 | 0.608432253 | -0.081970779 | 6  | 382 |
| SLAMF6      | chr1  | 160492553 | 160494552 | 0.339901823 | 0.410275279 | -0.070373456 | 2  | 383 |
| POU5F1P6    | chr3  | 128395349 | 128397348 | 0.63566149  | 0.739191406 | -0.103529916 | 1  | 384 |
| PSMD2       | chr3  | 184014997 | 184016996 | 0.078716033 | 0.130606806 | -0.051890773 | 5  | 385 |
| CLK2        | chr1  | 155247783 | 155249782 | 0.364268005 | 0.421237979 | -0.056969973 | 2  | 386 |
| SNORD16     | chr15 | 66794749  | 66796748  | 0.478243712 | 0.55105549  | -0.072811778 | 6  | 387 |
| NA          | chr4  | 158125508 | 158127507 | 0.321638915 | 0.373187351 | -0.051548437 | 3  | 388 |
| NA          | chr1  | 157893355 | 157895354 | 0.631370094 | 0.732989705 | -0.101619611 | 1  | 389 |
| LPAL2       | chr6  | 160931657 | 160933656 | 0.149021982 | 0.268396538 | -0.119374557 | 2  | 390 |
| NA          | chr6  | 19752845  | 19754844  | 0.394018468 | 0.475150125 | -0.081131657 | 1  | 391 |
| NA          | chr1  | 11839177  | 11841176  | 0.740311514 | 0.858815449 | -0.118503935 | 1  | 392 |
| NA          | chr6  | 159585441 | 159587440 | 0.825257525 | 0.711396925 | 0.1138606    | 1  | 393 |
| NA          | chr2  | 20355319  | 20357318  | 0.268560714 | 0.369063605 | -0.100502892 | 1  | 394 |
| MS4A6A      | chr11 | 59951640  | 59953639  | 0.351054254 | 0.475774906 | -0.124720652 | 4  | 395 |
| DEFB133     | chr6  | 49916658  | 49918657  | 0.356318778 | 0.430890827 | -0.074572048 | 6  | 396 |
| NA          | chr8  | 143328728 | 143330727 | 0.785501876 | 0.910159974 | -0.124658098 | 1  | 397 |
| DISC1FP1    | chr11 | 89982900  | 89984899  | 0.765695246 | 0.660623534 | 0.105071713  | 1  | 398 |
| NA          | chr1  | 3584837   | 3586836   | 0.545332301 | 0.611382634 | -0.066050333 | 2  | 399 |
| BTLA        | chr3  | 112217909 | 112219908 | 0.805509707 | 0.706624081 | 0.098885626  | 3  | 400 |
| C4orf50     | chr4  | 5991046   | 5993045   | 0.811258733 | 0.700638669 | 0.110620065  | 1  | 401 |
| MMP24       | chr20 | 33812957  | 33814956  | 0.641425436 | 0.528285375 | 0.113140062  | 2  | 402 |
| ERI1        | chr8  | 8858157   | 8860156   | 0.827534763 | 0.73636696  | 0.091167803  | 4  | 403 |
| UGT3A1      | chr5  | 36000631  | 36002630  | 0.510870244 | 0.590731031 | -0.079860787 | 3  | 404 |
| NA          | chr2  | 220223206 | 220225205 | 0.22182366  | 0.311963666 | -0.090140006 | 3  | 405 |

|                     |       |           |           |             |             |              |    |     |
|---------------------|-------|-----------|-----------|-------------|-------------|--------------|----|-----|
| HNRNPCL1            | chr1  | 12908079  | 12910078  | 0.569883056 | 0.627057451 | -0.057174395 | 5  | 406 |
| OXCT1               | chr5  | 41870122  | 41872121  | 0.437022727 | 0.50771127  | -0.070688543 | 11 | 407 |
| TMEM202             | chr15 | 72689114  | 72691113  | 0.624312997 | 0.677328549 | -0.053015553 | 2  | 408 |
| NA                  | chr1  | 149604140 | 149606139 | 0.239121685 | 0.350729923 | -0.111608239 | 1  | 409 |
| DUSP26              | chr8  | 33457125  | 33459124  | 0.528877195 | 0.595269906 | -0.066392711 | 9  | 410 |
| RN7SL718P           | chr19 | 41696635  | 41698634  | 0.614410101 | 0.710849891 | -0.09643979  | 1  | 411 |
| GPR62               | chr3  | 51987830  | 51989829  | 0.724576193 | 0.822070389 | -0.097494196 | 4  | 412 |
| TRAV16              | chr14 | 22457235  | 22459234  | 0.547292508 | 0.597150971 | -0.049858464 | 2  | 413 |
| NA                  | chr12 | 81155433  | 81157432  | 0.673574943 | 0.778897148 | -0.105322205 | 1  | 414 |
| TGFBR3L             | chr19 | 7979530   | 7981529   | 0.45352614  | 0.503323177 | -0.049797037 | 4  | 415 |
| NA                  | chr11 | 13030207  | 13032206  | 0.531703886 | 0.63101263  | -0.099308745 | 11 | 416 |
| NA                  | chr16 | 48525913  | 48527912  | 0.744378681 | 0.594219433 | 0.150159248  | 1  | 417 |
| NA                  | chr6  | 155701818 | 155703817 | 0.593404909 | 0.710898626 | -0.117493717 | 1  | 418 |
| SCARF2              | chr22 | 20791647  | 20793646  | 0.273210582 | 0.357018311 | -0.083807729 | 10 | 419 |
| CHIA                | chr1  | 111831984 | 111833983 | 0.634567783 | 0.692137932 | -0.057570148 | 5  | 420 |
| OR4N4               | chr15 | 22380882  | 22382881  | 0.440058134 | 0.508546208 | -0.068488073 | 1  | 421 |
| FTLP17              | chr1  | 104695953 | 104697952 | 0.51814528  | 0.598423032 | -0.080277752 | 1  | 422 |
| HIST1H2APS6         | chr13 | 37064079  | 37066078  | 0.51977818  | 0.449910136 | 0.069868045  | 1  | 423 |
| LCE1E               | chr1  | 152757190 | 152759189 | 0.464425375 | 0.519649852 | -0.055224477 | 4  | 424 |
| RASGEF1A            | chr10 | 43761868  | 43763867  | 0.557951656 | 0.508652318 | 0.049299337  | 3  | 425 |
| RPL4P5              | chr9  | 7477821   | 7479820   | 0.615307968 | 0.69565618  | -0.080348212 | 2  | 426 |
| NA                  | chr1  | 89724765  | 89726764  | 0.615381426 | 0.709933518 | -0.094552092 | 1  | 427 |
| RNF166              | chr16 | 88772330  | 88774329  | 0.165043301 | 0.214183279 | -0.049139978 | 8  | 428 |
| SUMO2P6             | chr5  | 173987279 | 173989278 | 0.644989824 | 0.743875575 | -0.098885751 | 1  | 429 |
| LPAR3               | chr1  | 85358397  | 85360396  | 0.346739699 | 0.395798313 | -0.049058614 | 7  | 430 |
| NA                  | chr3  | 106044641 | 106046640 | 0.780526659 | 0.662362743 | 0.118163916  | 1  | 431 |
| LG11                | chr10 | 95516066  | 95518065  | 0.488506103 | 0.537507268 | -0.049001166 | 10 | 432 |
| NA                  | chrX  | 51138815  | 51140814  | 0.245371921 | 0.327919409 | -0.082547487 | 5  | 433 |
| IGHV3-37            | chr14 | 106852527 | 106854526 | 0.268202852 | 0.317092728 | -0.048889876 | 3  | 434 |
| NA                  | chr7  | 126853681 | 126855680 | 0.651775174 | 0.751013843 | -0.09923867  | 1  | 435 |
| TNR-IT1             | chr1  | 175525455 | 175527454 | 0.414300235 | 0.541687169 | -0.127386935 | 1  | 436 |
| OR2S2               | chr9  | 35957652  | 35959651  | 0.67908555  | 0.782355926 | -0.103270377 | 1  | 437 |
| NA                  | chr5  | 1966769   | 1968768   | 0.468492212 | 0.633709359 | -0.165217148 | 1  | 438 |
| NA                  | chr5  | 1966708   | 1968707   | 0.468492212 | 0.633709359 | -0.165217148 | 1  | 439 |
| FAM57B              | chr16 | 30063800  | 30065799  | 0.309577052 | 0.255467686 | 0.054109366  | 4  | 440 |
| KRTAP19-2           | chr21 | 31859256  | 31861255  | 0.291578749 | 0.379785487 | -0.088206737 | 1  | 441 |
| CTBP2P4             | chr5  | 97910545  | 97912544  | 0.576320432 | 0.672338971 | -0.096018539 | 2  | 442 |
| OR10H5              | chr19 | 15903261  | 15905260  | 0.521190183 | 0.569403902 | -0.048213719 | 3  | 443 |
| NA                  | chr4  | 189320390 | 189322389 | 0.382802667 | 0.455859119 | -0.073056452 | 3  | 444 |
| MIR5701-1;MIR5701-2 | chr15 | 21144081  | 21146080  | 0.716715331 | 0.798541049 | -0.081825718 | 6  | 445 |
| CT60                | chr15 | 21144267  | 21146266  | 0.716715331 | 0.798541049 | -0.081825718 | 6  | 446 |
| ATP1A1OS            | chr1  | 116960698 | 116962697 | 0.283737133 | 0.331714572 | -0.047977439 | 11 | 447 |
| NA                  | chr7  | 47088777  | 47090776  | 0.552805934 | 0.646933099 | -0.094127165 | 2  | 448 |
| NA                  | chr9  | 99486672  | 99488671  | 0.574672114 | 0.674405884 | -0.09973377  | 1  | 449 |
| OR52A5              | chr11 | 5153373   | 5155372   | 0.793693803 | 0.690734105 | 0.102959698  | 1  | 450 |
| PTP4A2P1            | chr17 | 40684050  | 40686049  | 0.084815991 | 0.132685376 | -0.047869385 | 2  | 451 |
| CLCF1               | chr11 | 67141149  | 67143148  | 0.49492381  | 0.54273789  | -0.04781408  | 13 | 452 |
| OR13C4              | chr9  | 107288991 | 107290990 | 0.445526586 | 0.619164069 | -0.173637483 | 1  | 453 |
| ITLN1               | chr1  | 160854461 | 160856460 | 0.664699915 | 0.565880466 | 0.098819448  | 5  | 454 |
| MARCH10             | chr17 | 60885206  | 60887205  | 0.701235651 | 0.788278026 | -0.087042375 | 9  | 455 |
| NA                  | chr17 | 60884361  | 60886360  | 0.701235651 | 0.788278026 | -0.087042375 | 9  | 456 |
| LELP1               | chr1  | 153174419 | 153176418 | 0.308074097 | 0.387121549 | -0.079047451 | 6  | 457 |
| MIR148B             | chr12 | 54729500  | 54731499  | 0.586555024 | 0.654931358 | -0.068376334 | 4  | 458 |
| BBS10               | chr12 | 76741723  | 76743722  | 0.241064635 | 0.131405949 | 0.109658686  | 13 | 459 |
| NA                  | chr2  | 25919558  | 25921557  | 0.32403528  | 0.399267803 | -0.075232523 | 1  | 460 |
| CLUU1OS             | chr12 | 92821425  | 92823424  | 0.682151127 | 0.756167513 | -0.074016385 | 2  | 461 |
| NA                  | chr15 | 50790442  | 50792441  | 0.45489783  | 0.522334463 | -0.067436633 | 1  | 462 |
| PLXNB1              | chr3  | 48471095  | 48473094  | 0.312566962 | 0.259929936 | 0.052637026  | 8  | 463 |
| SYT3                | chr19 | 51171152  | 51173151  | 0.464084667 | 0.52910856  | -0.065023893 | 6  | 464 |
| CABS1               | chr4  | 71199198  | 71201197  | 0.483377459 | 0.545131394 | -0.061753934 | 3  | 465 |
| ACTG1P4             | chr1  | 104110675 | 104112674 | 0.751769834 | 0.681804771 | 0.069965063  | 2  | 466 |
| OR2A2               | chr7  | 143805107 | 143807106 | 0.466598734 | 0.562201349 | -0.095602615 | 3  | 467 |
| PCDH15              | chr10 | 57387203  | 57389202  | 0.282742289 | 0.334431375 | -0.051689086 | 9  | 468 |
| MND1                | chr4  | 154264301 | 154266300 | 0.116295594 | 0.060928264 | 0.05536733   | 8  | 469 |
| MUC16               | chr19 | 9091519   | 9093518   | 0.380792325 | 0.540941445 | -0.16014912  | 4  | 470 |
| NA                  | chr11 | 64412371  | 64414370  | 0.81520568  | 0.711541233 | 0.103664447  | 1  | 471 |
| MIR105-2            | chrX  | 151562465 | 151564464 | 0.218162876 | 0.301904841 | -0.083741965 | 2  | 472 |
| CPT1A               | chr11 | 68611379  | 68613378  | 0.556098075 | 0.693028314 | -0.136930239 | 3  | 473 |

|             |       |           |           |             |             |              |    |     |
|-------------|-------|-----------|-----------|-------------|-------------|--------------|----|-----|
| ANKRD20A5P  | chr18 | 14177596  | 14179595  | 0.282132617 | 0.329070596 | -0.046937979 | 3  | 474 |
| NA          | chr12 | 56493615  | 56495614  | 0.883375476 | 0.77162053  | 0.111754946  | 1  | 475 |
| NA          | chr5  | 86041135  | 86043134  | 0.507675915 | 0.56119954  | -0.053523625 | 2  | 476 |
| F2RL2       | chr5  | 75918760  | 75920759  | 0.512491607 | 0.560572309 | -0.048080702 | 5  | 477 |
| WDR86       | chr7  | 151107314 | 151109313 | 0.41709132  | 0.46556177  | -0.048470451 | 5  | 478 |
| SNORD115-42 | chr15 | 25490992  | 25492991  | 0.475671862 | 0.541195125 | -0.065523263 | 10 | 479 |
| TRAV8-5     | chr14 | 22369757  | 22371756  | 0.27917838  | 0.327653481 | -0.048475101 | 2  | 480 |
| SYBU        | chr8  | 110703521 | 110705520 | 0.434826763 | 0.481356049 | -0.046529286 | 9  | 481 |
| ATCAY       | chr19 | 3878362   | 3880361   | 0.745533335 | 0.842734247 | -0.097200912 | 3  | 482 |
| IGFBP7      | chr4  | 57976052  | 57978051  | 0.164716418 | 0.265689493 | -0.100973075 | 9  | 483 |
| PTPN3       | chr9  | 112260091 | 112262090 | 0.495022979 | 0.561012018 | -0.065989039 | 3  | 484 |
| BDH2        | chr4  | 104020541 | 104022540 | 0.392034078 | 0.441296105 | -0.049262027 | 5  | 485 |
| CPZ         | chr4  | 8592887   | 8594886   | 0.530963413 | 0.57741693  | -0.046453517 | 10 | 486 |
| TRGV7       | chr7  | 38374616  | 38376615  | 0.318490996 | 0.389720797 | -0.0712298   | 2  | 487 |
| CYP4A22     | chr1  | 47601607  | 47603606  | 0.467276449 | 0.542546126 | -0.075269677 | 2  | 488 |
| TTI1        | chr20 | 36661371  | 36663370  | 0.343867312 | 0.297428204 | 0.046439108  | 9  | 489 |
| SNORD115-35 | chr15 | 25477894  | 25479893  | 0.403663344 | 0.479761138 | -0.076097794 | 6  | 490 |
| NA          | chr11 | 92669107  | 92671106  | 0.852660772 | 0.745806914 | 0.106853858  | 1  | 491 |
| NA          | chr11 | 89517613  | 89519612  | 0.655579255 | 0.57588275  | 0.079696504  | 2  | 492 |
| GPR82       | chrX  | 41581908  | 41583907  | 0.666904448 | 0.762376992 | -0.095472544 | 1  | 493 |
| RARRES2P7   | chr16 | 34648619  | 34650618  | 0.625781039 | 0.704643756 | -0.078862717 | 3  | 494 |
| NA          | chr1  | 30181895  | 30183894  | 0.905591671 | 0.792577798 | 0.113013873  | 1  | 495 |
| WDR45B      | chr17 | 80605930  | 80607929  | 0.421223983 | 0.375128988 | 0.046094996  | 4  | 496 |
| SEMA4C      | chr2  | 97535995  | 97537994  | 0.366808358 | 0.318532672 | 0.048275686  | 3  | 497 |
| MPZL1       | chr1  | 167688929 | 167690928 | 0.48792985  | 0.5422939   | -0.05436405  | 5  | 498 |
| ACAA1       | chr3  | 38178234  | 38180233  | 0.33402133  | 0.402702498 | -0.068681167 | 13 | 499 |
| NA          | chr16 | 60392246  | 60394245  | 0.597769068 | 0.68251828  | -0.084749212 | 1  | 500 |
| OR6C3       | chr12 | 55723985  | 55725984  | 0.199349334 | 0.322278375 | -0.122929041 | 1  | 501 |
| RIN3        | chr14 | 92978618  | 92980617  | 0.383206393 | 0.428877811 | -0.045671418 | 9  | 502 |
| FAM170A     | chr5  | 118963754 | 118965753 | 0.667929133 | 0.744259852 | -0.076330719 | 8  | 503 |
| FGG         | chr4  | 155533620 | 155535619 | 0.714681034 | 0.625362558 | 0.089318476  | 4  | 504 |
| NA          | chr15 | 100345728 | 100347727 | 0.270339159 | 0.224746932 | 0.045592227  | 1  | 505 |
| MAGEA2      | chrX  | 151921865 | 151923864 | 0.597574235 | 0.523757361 | 0.073816874  | 1  | 506 |
| CSAG2       | chrX  | 151920945 | 151922944 | 0.597574235 | 0.523757361 | 0.073816874  | 1  | 507 |
| TRBV27      | chr7  | 142421673 | 142423672 | 0.353965751 | 0.399426683 | -0.045460931 | 3  | 508 |
| GABRA6      | chr5  | 160972569 | 160974568 | 0.154859929 | 0.200308798 | -0.045448869 | 8  | 509 |
| WNT7B       | chr22 | 46372510  | 46374509  | 0.205962257 | 0.251346089 | -0.045383832 | 5  | 510 |
| IGFBP2      | chr2  | 217496051 | 217498050 | 0.137785002 | 0.193463468 | -0.055678466 | 5  | 511 |
| NA          | chr12 | 131141218 | 131143217 | 0.728534086 | 0.810538416 | -0.08200433  | 5  | 512 |
| NA          | chr5  | 121646869 | 121648868 | 0.091581903 | 0.13679703  | -0.045215127 | 12 | 513 |
| SLC26A4-AS1 | chr7  | 107302097 | 107304096 | 0.194576724 | 0.239754454 | -0.04517773  | 8  | 514 |
| SNX10       | chr7  | 26330041  | 26332040  | 0.072053352 | 0.133642872 | -0.06158952  | 9  | 515 |
| GZMA        | chr5  | 54396976  | 54398975  | 0.811172034 | 0.726738032 | 0.084434002  | 4  | 516 |
| NA          | chr3  | 186193016 | 186195015 | 0.700608631 | 0.7976785   | -0.097069869 | 1  | 517 |
| OR52H1      | chr11 | 5566280   | 5568279   | 0.247810412 | 0.354983158 | -0.107172746 | 3  | 518 |
| NA          | chr11 | 128394537 | 128396536 | 0.42397758  | 0.510735134 | -0.086757554 | 1  | 519 |
| CRK         | chr17 | 1365957   | 1367956   | 0.67395123  | 0.598618494 | 0.075332736  | 4  | 520 |
| NA          | chrX  | 135567951 | 135569950 | 0.796400663 | 0.714442438 | 0.081958225  | 2  | 521 |
| SNORD62A    | chr9  | 134359552 | 134361551 | 0.833029228 | 0.947634725 | -0.114605497 | 1  | 522 |
| PDE6H       | chr12 | 15124456  | 15126455  | 0.768606322 | 0.844718512 | -0.07611219  | 6  | 523 |
| NA          | chr19 | 58174148  | 58176147  | 0.171120725 | 0.22715392  | -0.056033195 | 4  | 524 |
| IGFL1       | chr19 | 46731509  | 46733508  | 0.564634124 | 0.6093643   | -0.044730176 | 5  | 525 |
| NA          | chr12 | 119631155 | 119633154 | 0.678886001 | 0.753292653 | -0.074406652 | 3  | 526 |
| ZDHHC18     | chr1  | 27151701  | 27153700  | 0.46800552  | 0.423293764 | 0.044711756  | 6  | 527 |
| NA          | chr8  | 72744424  | 72746423  | 0.467438874 | 0.40118316  | 0.066255713  | 1  | 528 |
| NA          | chr10 | 91458929  | 91460928  | 0.759688487 | 0.863465657 | -0.10377717  | 1  | 529 |
| RNU6-560P   | chr11 | 85862769  | 85864768  | 0.376182093 | 0.45732797  | -0.081145877 | 1  | 530 |
| NA          | chr1  | 190448009 | 190450008 | 0.427048731 | 0.375127102 | 0.051921629  | 1  | 531 |
| NA          | chr2  | 38742383  | 38744382  | 0.661585982 | 0.739379456 | -0.077793475 | 4  | 532 |
| ARMCX6      | chrX  | 100872492 | 100874491 | 0.204246765 | 0.282291302 | -0.078044537 | 8  | 533 |
| NA          | chr16 | 86468991  | 86470990  | 0.721536511 | 0.820031188 | -0.098494677 | 1  | 534 |
| NA          | chr4  | 120725171 | 120727170 | 0.309586648 | 0.413764847 | -0.1041782   | 1  | 535 |
| PDYN        | chr20 | 1974233   | 1976232   | 0.617032757 | 0.678948042 | -0.061915286 | 7  | 536 |
| NA          | chr3  | 98342389  | 98344388  | 0.754172837 | 0.845783915 | -0.091611078 | 2  | 537 |
| RNU6-813P   | chr6  | 151936515 | 151938514 | 0.772750983 | 0.680347951 | 0.092403032  | 1  | 538 |
| GPR42       | chr19 | 35860331  | 35862330  | 0.638921488 | 0.725448658 | -0.086527169 | 1  | 539 |
| IFNA7       | chr9  | 21201705  | 21203704  | 0.650890332 | 0.568735697 | 0.082154635  | 1  | 540 |
| PKMP3       | chr6  | 86369825  | 86371824  | 0.757422894 | 0.859635635 | -0.102212741 | 1  | 541 |

|           |       |           |           |             |             |              |    |     |
|-----------|-------|-----------|-----------|-------------|-------------|--------------|----|-----|
| KRT34     | chr17 | 39538156  | 39540155  | 0.726279563 | 0.80367993  | -0.077400367 | 4  | 542 |
| TMEM54    | chr1  | 33366540  | 33368539  | 0.564479975 | 0.520285255 | 0.04419472   | 5  | 543 |
| ZCCHC18   | chrX  | 103355322 | 103357321 | 0.373801152 | 0.41769003  | -0.043888878 | 5  | 544 |
| ZNF786    | chr7  | 148787375 | 148789374 | 0.152984666 | 0.196840251 | -0.043855585 | 7  | 545 |
| NA        | chr16 | 58229516  | 58231515  | 0.646458828 | 0.733565152 | -0.087106324 | 1  | 546 |
| TAS2R38   | chr7  | 141673074 | 141675073 | 0.705690724 | 0.771916277 | -0.066225553 | 6  | 547 |
| FAM19A1   | chr3  | 68051859  | 68053858  | 0.368223896 | 0.412008588 | -0.043784693 | 3  | 548 |
| AFG3L2    | chr18 | 12376814  | 12378813  | 0.210553582 | 0.263441626 | -0.052888044 | 10 | 549 |
| NA        | chr15 | 66585196  | 66587195  | 0.118842813 | 0.16587846  | -0.047035647 | 8  | 550 |
| PRELP     | chr1  | 203443456 | 203445455 | 0.700118772 | 0.772741792 | -0.072623021 | 4  | 551 |
| KRTAP20-4 | chr21 | 31991446  | 31993445  | 0.485371413 | 0.586545979 | -0.101174566 | 1  | 552 |
| AKR1C4    | chr10 | 5235925   | 5237924   | 0.659467281 | 0.749883168 | -0.090415887 | 3  | 553 |
| PRSS29P   | chr16 | 1313347   | 1315346   | 0.418842046 | 0.536189649 | -0.117347603 | 1  | 554 |
| NA        | chr2  | 71220073  | 71222072  | 0.20963973  | 0.252965733 | -0.043326003 | 3  | 555 |
| NA        | chr2  | 151476082 | 151478081 | 0.712866468 | 0.807965324 | -0.095098856 | 1  | 556 |
| OR6W1P    | chr7  | 142760236 | 142762235 | 0.478504213 | 0.562258176 | -0.083753964 | 2  | 557 |
| NA        | chr4  | 137316127 | 137318126 | 0.575092838 | 0.656614792 | -0.081521954 | 2  | 558 |
| SPANXC    | chrX  | 140336130 | 140338129 | 0.477245908 | 0.544062292 | -0.066816384 | 2  | 559 |
| NA        | chr22 | 24404205  | 24406204  | 0.741857155 | 0.840531253 | -0.098674098 | 1  | 560 |
| ZNF853    | chr7  | 6653748   | 6655747   | 0.501850553 | 0.448826387 | 0.053024166  | 5  | 561 |
| LINC00696 | chr3  | 52097068  | 52099067  | 0.731171727 | 0.659887476 | 0.071284251  | 2  | 562 |
| NA        | chr10 | 103467659 | 103469658 | 0.305496205 | 0.34851097  | -0.043014765 | 1  | 563 |
| OR9I1     | chr11 | 57886417  | 57888416  | 0.306180419 | 0.426326382 | -0.120145963 | 2  | 564 |
| BHLHE23   | chr20 | 61637888  | 61639887  | 0.561227896 | 0.63558759  | -0.074359695 | 9  | 565 |
| CHRN2     | chr1  | 154538757 | 154540756 | 0.518247484 | 0.574896918 | -0.056649434 | 10 | 566 |
| NA        | chr2  | 106577963 | 106579962 | 0.713465455 | 0.806993203 | -0.093527748 | 1  | 567 |
| FBXO27    | chr19 | 39522926  | 39524925  | 0.533474916 | 0.577362341 | -0.043887425 | 7  | 568 |
| SOX6      | chr11 | 16760639  | 16762638  | 0.414388792 | 0.456861199 | -0.042472406 | 5  | 569 |
| SYNPR     | chr3  | 63212491  | 63214490  | 0.523637609 | 0.675715687 | -0.152078078 | 1  | 570 |
| NA        | chr12 | 79187395  | 79189394  | 0.715884701 | 0.79072138  | -0.074836679 | 3  | 571 |
| NA        | chr11 | 4206870   | 4208869   | 0.105632317 | 0.148008141 | -0.042375824 | 3  | 572 |
| COX4I1    | chr16 | 85830739  | 85832738  | 0.209419242 | 0.251764245 | -0.042345002 | 6  | 573 |
| MIR3663   | chr10 | 118926786 | 118928785 | 0.7116284   | 0.636355755 | 0.075272645  | 5  | 574 |
| ZNF597    | chr16 | 3493043   | 3495042   | 0.543079797 | 0.609847164 | -0.066767366 | 12 | 575 |
| NA        | chr10 | 104884674 | 104886673 | 0.902028279 | 0.806523249 | 0.095505031  | 2  | 576 |
| NA        | chr9  | 29826210  | 29828209  | 0.605175118 | 0.67490027  | -0.069725152 | 2  | 577 |
| SHISA5    | chr3  | 48541760  | 48543759  | 0.734637015 | 0.649913597 | 0.084723418  | 3  | 578 |
| NA        | chr11 | 119193620 | 119195619 | 0.493098355 | 0.436024254 | 0.057074101  | 1  | 579 |
| NA        | chr11 | 131121817 | 131123816 | 0.316317349 | 0.382037188 | -0.065719838 | 1  | 580 |
| GXYLT2    | chr3  | 72935724  | 72937723  | 0.282071756 | 0.324148456 | -0.0420767   | 2  | 581 |
| PCDHA13   | chr5  | 140260293 | 140262292 | 0.686967359 | 0.737144529 | -0.05017717  | 10 | 582 |
| SPATA6L   | chr9  | 4666175   | 4668174   | 0.116446054 | 0.177798413 | -0.061352358 | 4  | 583 |
| TMC4      | chr19 | 54676445  | 54678444  | 0.393436399 | 0.338323451 | 0.055112948  | 6  | 584 |
| TMSB15B   | chrX  | 103171979 | 103173978 | 0.333691731 | 0.396247878 | -0.062556147 | 3  | 585 |
| TP53I11   | chr11 | 44972341  | 44974340  | 0.618144429 | 0.671764527 | -0.053620097 | 11 | 586 |
| TRAC      | chr14 | 23014947  | 23016946  | 0.736527245 | 0.831545822 | -0.095018577 | 1  | 587 |
| CHST4     | chr16 | 71557636  | 71559635  | 0.903250681 | 0.807931397 | 0.095319283  | 3  | 588 |
| PRPH      | chr12 | 49685535  | 49687534  | 0.571061496 | 0.644979254 | -0.073917758 | 1  | 589 |
| ATP6V1G1  | chr9  | 117348526 | 117350525 | 0.318098627 | 0.359974905 | -0.041876278 | 7  | 590 |
| OVCH2     | chr11 | 7727469   | 7729468   | 0.384932659 | 0.444463803 | -0.059531143 | 4  | 591 |
| ZNF619    | chr3  | 40517104  | 40519103  | 0.328104223 | 0.370794843 | -0.042690621 | 8  | 592 |
| NTAN1P3   | chr12 | 67818267  | 67820266  | 0.525931884 | 0.421038107 | 0.104893777  | 1  | 593 |
| PPIAP17   | chr20 | 16204681  | 16206680  | 0.587054757 | 0.730415787 | -0.14336103  | 1  | 594 |
| NA        | chr10 | 23631386  | 23633385  | 0.13376116  | 0.19600375  | -0.06224259  | 4  | 595 |
| OR2AT4    | chr11 | 74800300  | 74802299  | 0.614289018 | 0.557583575 | 0.056705442  | 4  | 596 |
| NA        | chr15 | 78236425  | 78238424  | 0.340623188 | 0.382293672 | -0.041670484 | 4  | 597 |
| NA        | chr1  | 27020123  | 27022122  | 0.317954448 | 0.359620912 | -0.041666464 | 6  | 598 |
| NA        | chr5  | 7306206   | 7308205   | 0.642554341 | 0.724990992 | -0.082436651 | 1  | 599 |
| C20orf166 | chr20 | 61146160  | 61148159  | 0.690536245 | 0.632534949 | 0.058001297  | 9  | 600 |
| NA        | chr15 | 42873187  | 42875186  | 0.08672454  | 0.156017308 | -0.069292767 | 5  | 601 |
| PTGES3P1  | chr1  | 89569951  | 89571950  | 0.798023823 | 0.899894362 | -0.101870539 | 1  | 602 |
| TRPS1     | chr8  | 116821400 | 116823399 | 0.417414709 | 0.471221882 | -0.053807173 | 1  | 603 |
| LINC00507 | chr12 | 128398417 | 128400416 | 0.279807869 | 0.39196523  | -0.112157361 | 1  | 604 |
| SPINT4    | chr20 | 44349490  | 44351489  | 0.318588208 | 0.478298833 | -0.159710625 | 2  | 605 |
| CHIAP2    | chr1  | 111821181 | 111823180 | 0.411260268 | 0.493045485 | -0.081785217 | 4  | 606 |
| PACSIN2   | chr22 | 43410652  | 43412651  | 0.088660465 | 0.129857903 | -0.041197438 | 6  | 607 |
| CA2       | chr8  | 86374581  | 86376580  | 0.096817819 | 0.14767996  | -0.050862141 | 7  | 608 |
| KPRP      | chr1  | 152729006 | 152731005 | 0.515417324 | 0.556534247 | -0.041116923 | 6  | 609 |

|             |       |           |           |             |             |              |    |     |
|-------------|-------|-----------|-----------|-------------|-------------|--------------|----|-----|
| NA          | chr12 | 17140560  | 17142559  | 0.711225592 | 0.801543092 | -0.090317499 | 1  | 610 |
| KRTAP10-9   | chr21 | 46045540  | 46047539  | 0.66157182  | 0.717998919 | -0.056427099 | 4  | 611 |
| NA          | chr5  | 172183729 | 172185728 | 0.727469193 | 0.819764751 | -0.092295558 | 1  | 612 |
| DCTD        | chr4  | 183838590 | 183840589 | 0.360202695 | 0.419592269 | -0.059389574 | 9  | 613 |
| TCHH        | chr1  | 152086057 | 152088056 | 0.665060574 | 0.72121275  | -0.056152176 | 6  | 614 |
| NA          | chr9  | 69064155  | 69066154  | 0.422492824 | 0.476505169 | -0.054012345 | 1  | 615 |
| MIR515-1    | chr19 | 54180757  | 54182756  | 0.28401822  | 0.392156128 | -0.108137908 | 4  | 616 |
| MIR527      | chr19 | 54255772  | 54257771  | 0.736273729 | 0.828472924 | -0.092199195 | 3  | 617 |
| NA          | chr3  | 108854061 | 108856060 | 0.566808991 | 0.620650489 | -0.053841498 | 3  | 618 |
| C22orf26    | chr22 | 46449525  | 46451524  | 0.243838289 | 0.30195202  | -0.058113731 | 11 | 619 |
| MIR520E     | chr19 | 54177465  | 54179464  | 0.546087476 | 0.599366333 | -0.053278857 | 2  | 620 |
| NAB1        | chr2  | 191509972 | 191511971 | 0.784569459 | 0.883251935 | -0.098682476 | 1  | 621 |
| NA          | chr8  | 49501461  | 49503460  | 0.472456157 | 0.513408073 | -0.040951916 | 2  | 622 |
| NA          | chr16 | 33815798  | 33817797  | 0.54283702  | 0.607268233 | -0.064431213 | 3  | 623 |
| NA          | chr15 | 83382279  | 83384278  | 0.843977978 | 0.759838899 | 0.084139079  | 2  | 624 |
| OR52M1      | chr11 | 4564921   | 4566920   | 0.557589776 | 0.63194514  | -0.074355364 | 5  | 625 |
| NA          | chr12 | 11708273  | 11710272  | 0.710880049 | 0.79987815  | -0.088998101 | 1  | 626 |
| FAM217B     | chr20 | 58507319  | 58509318  | 0.657330459 | 0.697719158 | -0.040388699 | 8  | 627 |
| NA          | chr4  | 144619910 | 144621909 | 0.50941624  | 0.560979872 | -0.051563632 | 4  | 628 |
| TFAP2D      | chr6  | 50680041  | 50682040  | 0.131532158 | 0.171829341 | -0.040297183 | 5  | 629 |
| NLRP9       | chr19 | 56249269  | 56251268  | 0.668193371 | 0.730050388 | -0.061857017 | 5  | 630 |
| NA          | chr11 | 44488514  | 44490513  | 0.39465475  | 0.444441753 | -0.049787003 | 1  | 631 |
| NA          | chr16 | 73092644  | 73094643  | 0.232925309 | 0.279311362 | -0.046386053 | 3  | 632 |
| AGGF1P2     | chr10 | 135454090 | 135456089 | 0.597794401 | 0.672546858 | -0.074752457 | 1  | 633 |
| SLC2A3      | chr12 | 8088372   | 8090371   | 0.591014614 | 0.662066054 | -0.07105144  | 7  | 634 |
| NA          | chr8  | 21888361  | 21890360  | 0.27915665  | 0.336835979 | -0.057679329 | 1  | 635 |
| PNPLA4      | chrX  | 7895281   | 7897280   | 0.37528996  | 0.30819025  | 0.067099711  | 15 | 636 |
| IRX6        | chr16 | 55356172  | 55358171  | 0.397537103 | 0.437598235 | -0.040061131 | 4  | 637 |
| NA          | chr12 | 123233634 | 123235633 | 0.832205179 | 0.93558559  | -0.103380411 | 1  | 638 |
| NA          | chr20 | 10152668  | 10154667  | 0.166278861 | 0.126223989 | 0.040054872  | 4  | 639 |
| KRTAP6-3    | chr21 | 31963259  | 31965258  | 0.612991839 | 0.694983736 | -0.081991897 | 5  | 640 |
| NA          | chr21 | 31963286  | 31965285  | 0.612991839 | 0.694983736 | -0.081991897 | 5  | 641 |
| NA          | chr2  | 214148430 | 214150429 | 0.147336127 | 0.188029142 | -0.040693015 | 11 | 642 |
| C10orf131   | chr10 | 97665860  | 97667859  | 0.241258899 | 0.173890368 | 0.067368531  | 11 | 643 |
| RN7SL526P   | chr19 | 58579838  | 58581837  | 0.197099968 | 0.290591158 | -0.093491191 | 1  | 644 |
| NA          | chr3  | 154957234 | 154959233 | 0.784906465 | 0.712617073 | 0.072289392  | 4  | 645 |
| KRTAP19-4   | chr21 | 31868952  | 31870951  | 0.199877309 | 0.290357872 | -0.090480564 | 2  | 646 |
| NA          | chrX  | 111623120 | 111625119 | 0.585006621 | 0.642283731 | -0.05727711  | 4  | 647 |
| PRKRIRP2    | chr3  | 86060211  | 86062210  | 0.450817708 | 0.505277435 | -0.054459726 | 2  | 648 |
| NQO1        | chr16 | 69760355  | 69762354  | 0.117283628 | 0.157101141 | -0.039817513 | 8  | 649 |
| NA          | chr2  | 105373678 | 105375677 | 0.662887502 | 0.744818518 | -0.081931017 | 1  | 650 |
| SNRPD2P1    | chr10 | 91736974  | 91738973  | 0.7848898   | 0.852492221 | -0.067602421 | 5  | 651 |
| NA          | chr3  | 133127299 | 133129298 | 0.687052087 | 0.771532636 | -0.084480549 | 1  | 652 |
| RFPL2       | chr22 | 32600219  | 32602218  | 0.5474095   | 0.614791422 | -0.067381922 | 5  | 653 |
| SCUBE2      | chr11 | 9159162   | 9161161   | 0.351918533 | 0.416013446 | -0.064094912 | 2  | 654 |
| FAM47A      | chrX  | 34149948  | 34151947  | 0.600166948 | 0.650338281 | -0.050171333 | 6  | 655 |
| OLFM4       | chr13 | 53601394  | 53603393  | 0.732474465 | 0.797862143 | -0.065387677 | 6  | 656 |
| CCNYL3      | chr16 | 34261256  | 34263255  | 0.22782681  | 0.296009115 | -0.068182304 | 1  | 657 |
| TCEAL6      | chrX  | 101397443 | 101399442 | 0.513147954 | 0.561464992 | -0.048317038 | 4  | 658 |
| CYP11B1     | chr8  | 143960763 | 143962762 | 0.491275045 | 0.549272259 | -0.057997214 | 6  | 659 |
| LCE2A       | chr1  | 152669340 | 152671339 | 0.162113783 | 0.254806961 | -0.092693178 | 4  | 660 |
| FCRL3       | chr1  | 157670148 | 157672147 | 0.272299636 | 0.311783807 | -0.039484171 | 8  | 661 |
| SPANXD      | chrX  | 140786397 | 140788396 | 0.595866154 | 0.640403813 | -0.044537659 | 2  | 662 |
| SNORD18B    | chr15 | 66793930  | 66795929  | 0.566348703 | 0.625063485 | -0.058714781 | 8  | 663 |
| MIR767      | chrX  | 151561502 | 151563501 | 0.164615486 | 0.229211463 | -0.064595977 | 3  | 664 |
| MIR498      | chr19 | 54175951  | 54177950  | 0.432751229 | 0.500459313 | -0.067708085 | 5  | 665 |
| DNAJB14     | chr4  | 100867384 | 100869383 | 0.120837163 | 0.161560554 | -0.040723391 | 7  | 666 |
| FAM122A     | chr9  | 71393464  | 71395463  | 0.235431315 | 0.274791109 | -0.039359794 | 5  | 667 |
| NA          | chr6  | 154869151 | 154871150 | 0.401318341 | 0.4816488   | -0.080330459 | 1  | 668 |
| FTH1P19     | chrX  | 37349774  | 37351773  | 0.791999344 | 0.860862473 | -0.068863128 | 5  | 669 |
| SNORD115-20 | chr15 | 25449909  | 25451908  | 0.389042346 | 0.45710888  | -0.068066534 | 5  | 670 |
| NA          | chr20 | 39958263  | 39960262  | 0.614386794 | 0.745808959 | -0.131422165 | 1  | 671 |
| ANKRD20A14P | chr1  | 142802032 | 142804031 | 0.418272768 | 0.469375869 | -0.051103102 | 2  | 672 |
| NA          | chr7  | 5598874   | 5600873   | 0.710262959 | 0.816240563 | -0.105977604 | 1  | 673 |
| SPAG16      | chr2  | 214147613 | 214149612 | 0.151978098 | 0.191234251 | -0.039256153 | 11 | 674 |
| NA          | chr14 | 106444734 | 106446733 | 0.696733945 | 0.777634165 | -0.08090022  | 3  | 675 |
| NA          | chr14 | 54080245  | 54082244  | 0.437841805 | 0.540479497 | -0.102637692 | 1  | 676 |
| UBQLNL      | chr11 | 5537436   | 5539435   | 0.257735609 | 0.402688267 | -0.144952658 | 3  | 677 |

|             |       |           |           |             |             |              |    |     |
|-------------|-------|-----------|-----------|-------------|-------------|--------------|----|-----|
| OR6X1       | chr11 | 123624754 | 123626753 | 0.481834453 | 0.530977922 | -0.04914347  | 5  | 678 |
| RARRES2P9   | chr16 | 34578431  | 34580430  | 0.376391238 | 0.29120189  | 0.085189348  | 2  | 679 |
| WFDC8       | chr20 | 44207466  | 44209465  | 0.772132405 | 0.692024425 | 0.080107979  | 2  | 680 |
| BCL9        | chr1  | 147011682 | 147013681 | 0.11522003  | 0.163585988 | -0.048365957 | 6  | 681 |
| CDHR2       | chr5  | 175968012 | 175970011 | 0.612269525 | 0.546250657 | 0.066018867  | 1  | 682 |
| FLG2        | chr1  | 152331983 | 152333982 | 0.680019506 | 0.760756797 | -0.080737292 | 3  | 683 |
| CETN2       | chrX  | 151998822 | 152000821 | 0.413048297 | 0.458144505 | -0.045096208 | 14 | 684 |
| LINC00703   | chr10 | 4424938   | 4426937   | 0.736577625 | 0.824955334 | -0.088377709 | 1  | 685 |
| NA          | chr19 | 1746555   | 1748554   | 0.4317327   | 0.471896724 | -0.040164025 | 2  | 686 |
| NA          | chr8  | 124192266 | 124194265 | 0.912290096 | 0.814687686 | 0.09760241   | 1  | 687 |
| LDHD        | chr16 | 75150170  | 75152169  | 0.579114379 | 0.513392309 | 0.06572207   | 8  | 688 |
| GPR183      | chr13 | 99959160  | 99961159  | 0.671471885 | 0.71026817  | -0.038796285 | 4  | 689 |
| C1QTNF4     | chr11 | 47615712  | 47617711  | 0.654737713 | 0.720644388 | -0.065906675 | 5  | 690 |
| KCTD1       | chr18 | 24236866  | 24238865  | 0.196629657 | 0.235419571 | -0.038789914 | 4  | 691 |
| RFC5        | chr12 | 118449893 | 118451892 | 0.550469317 | 0.420590751 | 0.129878566  | 1  | 692 |
| ITPKB       | chr1  | 226926525 | 226928524 | 0.371086143 | 0.428941797 | -0.057855654 | 9  | 693 |
| NA          | chr12 | 102328494 | 102330493 | 0.764679522 | 0.683028064 | 0.081651457  | 1  | 694 |
| NA          | chr10 | 52827814  | 52829813  | 0.655686533 | 0.585553979 | 0.070132555  | 1  | 695 |
| TRBJ2-1     | chr7  | 142492549 | 142494548 | 0.618552685 | 0.673999622 | -0.055446938 | 8  | 696 |
| ARHGAP32    | chr11 | 129148720 | 129150719 | 0.346457174 | 0.275748508 | 0.070708666  | 6  | 697 |
| RNU6-1061P  | chr16 | 71596932  | 71598931  | 0.051845171 | 0.090412349 | -0.038567178 | 3  | 698 |
| RDH8        | chr19 | 10122425  | 10124424  | 0.576190123 | 0.649119278 | -0.072929155 | 4  | 699 |
| NA          | chr22 | 48025923  | 48027922  | 0.811488534 | 0.892128743 | -0.080640208 | 5  | 700 |
| NA          | chr3  | 170458655 | 170460654 | 0.726156479 | 0.620364739 | 0.105791739  | 1  | 701 |
| HCRTR2      | chr6  | 55037550  | 55039549  | 0.330023002 | 0.36853257  | -0.038509568 | 6  | 702 |
| TAS2R40     | chr7  | 142917630 | 142919629 | 0.591638135 | 0.640873986 | -0.049235851 | 4  | 703 |
| NA          | chr20 | 5094230   | 5096229   | 0.447729133 | 0.36494064  | 0.082788493  | 1  | 704 |
| NAA60       | chr16 | 3492111   | 3494110   | 0.569726458 | 0.628856609 | -0.059130151 | 12 | 705 |
| NA          | chr11 | 126521247 | 126523246 | 0.334894154 | 0.421186719 | -0.086292565 | 2  | 706 |
| MIR4270     | chr3  | 15537316  | 15539315  | 0.845412011 | 0.75580502  | 0.089606991  | 1  | 707 |
| NA          | chr1  | 142714106 | 142716105 | 0.536824544 | 0.600756471 | -0.063931926 | 1  | 708 |
| NA          | chr2  | 108158606 | 108160605 | 0.532831264 | 0.346871491 | 0.185959773  | 1  | 709 |
| DUSP23      | chr1  | 159749222 | 159751221 | 0.49763749  | 0.535914687 | -0.038277197 | 7  | 710 |
| CPQ         | chr8  | 97655955  | 97657954  | 0.321350615 | 0.361370538 | -0.040019923 | 14 | 711 |
| SRSF10      | chr1  | 24306918  | 24308917  | 0.742436514 | 0.687022484 | 0.055414029  | 5  | 712 |
| NA          | chr6  | 106867081 | 106869080 | 0.798890267 | 0.714566201 | 0.084324066  | 1  | 713 |
| ATE1        | chr10 | 123687817 | 123689816 | 0.082943102 | 0.044825903 | 0.038117199  | 3  | 714 |
| NA          | chr10 | 78905910  | 78907909  | 0.793314736 | 0.709709324 | 0.083605412  | 1  | 715 |
| NA          | chr5  | 1003654   | 1005653   | 0.310126539 | 0.353264373 | -0.043137834 | 6  | 716 |
| NA          | chr7  | 62516331  | 62518330  | 0.112176062 | 0.17358215  | -0.061406088 | 1  | 717 |
| OR7E155P    | chr13 | 42014536  | 42016535  | 0.753731675 | 0.824505682 | -0.070774007 | 2  | 718 |
| OR7E37P     | chr13 | 42015406  | 42017405  | 0.753731675 | 0.824505682 | -0.070774007 | 2  | 719 |
| EBP         | chrX  | 48378046  | 48380045  | 0.166562261 | 0.236727638 | -0.070165377 | 3  | 720 |
| NA          | chr12 | 60811264  | 60813263  | 0.473745339 | 0.581219757 | -0.107474418 | 2  | 721 |
| METTL21A    | chr2  | 208490153 | 208492152 | 0.416876715 | 0.363769164 | 0.053107551  | 5  | 722 |
| NA          | chr3  | 121963113 | 121965112 | 0.276574199 | 0.325143754 | -0.048569555 | 1  | 723 |
| PRPS2       | chrX  | 12807974  | 12809973  | 0.26259044  | 0.349054627 | -0.086464187 | 10 | 724 |
| NA          | chr17 | 36755802  | 36757801  | 0.758137582 | 0.679027663 | 0.079109918  | 1  | 725 |
| NA          | chr15 | 20482257  | 20484256  | 0.321238536 | 0.359213926 | -0.03797539  | 1  | 726 |
| KCNJ3       | chr2  | 155553311 | 155555310 | 0.312118968 | 0.265612017 | 0.046506951  | 10 | 727 |
| NA          | chr12 | 130529002 | 130531001 | 0.285196799 | 0.337251554 | -0.052054755 | 9  | 728 |
| MIR500A     | chrX  | 49771539  | 49773538  | 0.745985247 | 0.701766665 | 0.044218582  | 5  | 729 |
| NA          | chr3  | 81041519  | 81043518  | 0.649667785 | 0.581947603 | 0.067720182  | 1  | 730 |
| TBC1D3P7    | chr17 | 39478179  | 39480178  | 0.66414846  | 0.749873068 | -0.085724608 | 2  | 731 |
| NA          | chr20 | 1537800   | 1539799   | 0.654239578 | 0.697146816 | -0.042907238 | 5  | 732 |
| PCDHB1      | chr5  | 140429479 | 140431478 | 0.409644058 | 0.44713151  | -0.037487453 | 9  | 733 |
| HMGN2P6     | chr14 | 25736043  | 25738042  | 0.604136772 | 0.666463186 | -0.062326413 | 2  | 734 |
| NA          | chr11 | 89598219  | 89600218  | 0.364874724 | 0.425850204 | -0.060975481 | 1  | 735 |
| DAP         | chr5  | 10760885  | 10762884  | 0.304525623 | 0.267067209 | 0.037458414  | 5  | 736 |
| TRIM29      | chr11 | 120055738 | 120057737 | 0.911406232 | 0.817150221 | 0.094256012  | 1  | 737 |
| RPRD1B      | chr20 | 36660448  | 36662447  | 0.278761511 | 0.241361536 | 0.037399975  | 8  | 738 |
| MIR520C     | chr19 | 54209207  | 54211206  | 0.201418376 | 0.271487318 | -0.070068943 | 4  | 739 |
| SNORD115-23 | chr15 | 25455443  | 25457442  | 0.276135075 | 0.343208994 | -0.067073919 | 8  | 740 |
| NA          | chr2  | 171551385 | 171553384 | 0.598295686 | 0.645874081 | -0.047578395 | 3  | 741 |
| PDZD11      | chrX  | 69509865  | 69511864  | 0.425801434 | 0.470218293 | -0.044416859 | 5  | 742 |
| PPFIBP1     | chr12 | 27674864  | 27676863  | 0.20861876  | 0.162247083 | 0.046371677  | 3  | 743 |
| MIR518F     | chr19 | 54201769  | 54203768  | 0.372663973 | 0.409916199 | -0.037252226 | 5  | 744 |
| ADH1B       | chr4  | 100242059 | 100244058 | 0.199405308 | 0.265180106 | -0.065774798 | 3  | 745 |

|             |       |           |           |             |             |              |    |     |
|-------------|-------|-----------|-----------|-------------|-------------|--------------|----|-----|
| NA          | chr2  | 3626660   | 3628659   | 0.80992601  | 0.90287432  | -0.09294831  | 1  | 746 |
| PRAMEF21    | chr1  | 13514566  | 13516565  | 0.701093451 | 0.77631784  | -0.075224389 | 2  | 747 |
| PRR5        | chr22 | 45063093  | 45065092  | 0.375819589 | 0.298825267 | 0.076994323  | 6  | 748 |
| NA          | chr14 | 58566203  | 58568202  | 0.787112414 | 0.878569506 | -0.091457093 | 1  | 749 |
| NA          | chr10 | 74035239  | 74037238  | 0.299345174 | 0.355653388 | -0.056308214 | 2  | 750 |
| TRIM34      | chr11 | 5639494   | 5641493   | 0.856666979 | 0.775075918 | 0.081591061  | 3  | 751 |
| PPP1R17     | chr7  | 31724829  | 31726828  | 0.578006383 | 0.661339844 | -0.08333346  | 7  | 752 |
| NA          | chr8  | 1250330   | 1252329   | 0.553083888 | 0.61352598  | -0.060442092 | 3  | 753 |
| ZNF75D      | chrX  | 134477513 | 134479512 | 0.373004067 | 0.430938494 | -0.057934427 | 16 | 754 |
| ZNF449      | chrX  | 134477221 | 134479220 | 0.373004067 | 0.430938494 | -0.057934427 | 16 | 755 |
| MTHFSD      | chr16 | 86588342  | 86590341  | 0.216887957 | 0.2579791   | -0.041091143 | 15 | 756 |
| MAGED1      | chrX  | 51544603  | 51546602  | 0.477973891 | 0.575669497 | -0.097695606 | 5  | 757 |
| RNA5SP359   | chr12 | 38556818  | 38558817  | 0.707466165 | 0.758295881 | -0.050829716 | 5  | 758 |
| LRFN5       | chr14 | 42075273  | 42077272  | 0.301631331 | 0.358646939 | -0.057015609 | 12 | 759 |
| SLCO1B1     | chr12 | 21282636  | 21284635  | 0.291275661 | 0.337783201 | -0.04650754  | 1  | 760 |
| OR1N1       | chr9  | 125289073 | 125291072 | 0.449686991 | 0.532856085 | -0.083169094 | 2  | 761 |
| WFDC12      | chr20 | 43752607  | 43754606  | 0.880173163 | 0.825287379 | 0.054885785  | 6  | 762 |
| NA          | chr7  | 41744434  | 41746433  | 0.617367711 | 0.654186914 | -0.036819203 | 8  | 763 |
| SLCO1B3     | chr12 | 20962136  | 20964135  | 0.681638954 | 0.611825028 | 0.069813927  | 1  | 764 |
| RIMS4       | chr20 | 43438480  | 43440479  | 0.182054419 | 0.242385278 | -0.060330859 | 6  | 765 |
| NA          | chr10 | 38463096  | 38465095  | 0.147533248 | 0.260966522 | -0.113433274 | 1  | 766 |
| NA          | chr2  | 105318716 | 105320715 | 0.195576504 | 0.271265488 | -0.075688984 | 1  | 767 |
| NA          | chr8  | 62822862  | 62824861  | 0.575141185 | 0.681519265 | -0.10637808  | 3  | 768 |
| TAGLN       | chr11 | 117068537 | 117070536 | 0.421326769 | 0.482635172 | -0.061308403 | 9  | 769 |
| NA          | chr9  | 139980622 | 139982621 | 0.259376006 | 0.222770756 | 0.03660525   | 5  | 770 |
| MCCC1       | chr3  | 182833364 | 182835363 | 0.498925267 | 0.448901222 | 0.050024046  | 3  | 771 |
| LINC00967   | chr8  | 67102828  | 67104827  | 0.619446495 | 0.689665994 | -0.070219499 | 1  | 772 |
| C19orf24    | chr19 | 1273526   | 1275525   | 0.145150087 | 0.181708833 | -0.036558746 | 8  | 773 |
| NA          | chr17 | 53628511  | 53630510  | 0.629945339 | 0.70132531  | -0.071379971 | 1  | 774 |
| RNU6-1249P  | chr17 | 53627671  | 53629670  | 0.629945339 | 0.70132531  | -0.071379971 | 1  | 775 |
| MIR519B     | chr19 | 54196967  | 54198966  | 0.273228523 | 0.354741336 | -0.081512814 | 4  | 776 |
| TRBV28      | chr7  | 142426984 | 142428983 | 0.56786015  | 0.624291577 | -0.056431427 | 4  | 777 |
| MIR4269     | chr2  | 240225657 | 240227656 | 0.455653269 | 0.405113021 | 0.050540248  | 1  | 778 |
| KRTAP10-5   | chr21 | 45999982  | 46001981  | 0.520330962 | 0.483876438 | 0.036454523  | 2  | 779 |
| NA          | chr2  | 64368873  | 64370872  | 0.114157492 | 0.150537413 | -0.036379921 | 1  | 780 |
| OR56A3      | chr11 | 5967070   | 5969069   | 0.281720466 | 0.360275787 | -0.078555321 | 2  | 781 |
| COL24A1     | chr1  | 86622127  | 86624126  | 0.218213815 | 0.254580919 | -0.036367104 | 7  | 782 |
| RBP7        | chr1  | 10055764  | 10057763  | 0.597746496 | 0.658390683 | -0.060644187 | 11 | 783 |
| NA          | chr14 | 79219722  | 79221721  | 0.307279228 | 0.426118257 | -0.11883903  | 1  | 784 |
| TENC1       | chr12 | 53439253  | 53441252  | 0.415024621 | 0.451332471 | -0.03630785  | 4  | 785 |
| HTR3B       | chr11 | 113773899 | 113775898 | 0.864350974 | 0.781617717 | 0.082733258  | 3  | 786 |
| OR4C3       | chr11 | 48344972  | 48346971  | 0.15501351  | 0.220869689 | -0.065856179 | 2  | 787 |
| C14orf164   | chr14 | 23653025  | 23655024  | 0.556025099 | 0.592282794 | -0.036257695 | 2  | 788 |
| ATG4C       | chr1  | 63248306  | 63250305  | 0.249505277 | 0.316496762 | -0.066991485 | 10 | 789 |
| TMPRSS11D   | chr4  | 68749251  | 68751250  | 0.776434387 | 0.863125989 | -0.086691602 | 1  | 790 |
| FAM19A4     | chr3  | 68981262  | 68983261  | 0.199433847 | 0.235560312 | -0.036126465 | 10 | 791 |
| SNORD115-24 | chr15 | 25457295  | 25459294  | 0.237211557 | 0.310868181 | -0.073656624 | 3  | 792 |
| SNORD115-34 | chr15 | 25476034  | 25478033  | 0.381016687 | 0.465564772 | -0.084548085 | 4  | 793 |
| SNORD115-39 | chr15 | 25485393  | 25487392  | 0.250232064 | 0.286335405 | -0.036103341 | 5  | 794 |
| HNMT        | chr2  | 138720090 | 138722089 | 0.798715851 | 0.731218501 | 0.06749735   | 4  | 795 |
| OR2T3       | chr1  | 248635127 | 248637126 | 0.352766274 | 0.481542879 | -0.128776605 | 2  | 796 |
| SIRPG       | chr20 | 1637926   | 1639925   | 0.400002733 | 0.329841789 | 0.070160944  | 4  | 797 |
| NA          | chr1  | 181204024 | 181206023 | 0.804786277 | 0.893289967 | -0.088503689 | 2  | 798 |
| NA          | chr9  | 68297299  | 68299298  | 0.555595499 | 0.605112996 | -0.049517497 | 4  | 799 |
| OR5A1       | chr11 | 59209117  | 59211116  | 0.52824638  | 0.572311816 | -0.044065436 | 4  | 800 |
| OR9A4       | chr7  | 141617117 | 141619116 | 0.460144352 | 0.507033413 | -0.046889062 | 3  | 801 |
| ZER1        | chr9  | 131534194 | 131536193 | 0.277306668 | 0.313252333 | -0.035945665 | 4  | 802 |
| NA          | chr3  | 67703621  | 67705620  | 0.177839121 | 0.223990714 | -0.046151593 | 9  | 803 |
| NA          | chr15 | 93965306  | 93967305  | 0.775948452 | 0.851880405 | -0.075931953 | 2  | 804 |
| GNAT1       | chr3  | 50227545  | 50229544  | 0.873937991 | 0.818293728 | 0.055644263  | 5  | 805 |
| TRAPPC9     | chr8  | 141468179 | 141470178 | 0.756076697 | 0.810026545 | -0.053949848 | 8  | 806 |
| SLC9A9      | chr3  | 143566874 | 143568873 | 0.578738111 | 0.483799732 | 0.094938378  | 2  | 807 |
| NA          | chr22 | 37621536  | 37623535  | 0.701047313 | 0.778497222 | -0.07744991  | 1  | 808 |
| NA          | chr1  | 181142120 | 181144119 | 0.695096598 | 0.639451205 | 0.055645393  | 2  | 809 |
| RNA5SP354   | chr12 | 26526167  | 26528166  | 0.663228134 | 0.597104959 | 0.066123175  | 1  | 810 |
| STK19       | chr6  | 31937368  | 31939367  | 0.606450907 | 0.654726863 | -0.048275956 | 39 | 811 |
| RNU6-951P   | chr2  | 38373057  | 38375056  | 0.384348234 | 0.488598427 | -0.104250194 | 1  | 812 |
| LMO1        | chr11 | 8289764   | 8291763   | 0.533863584 | 0.585844855 | -0.051981271 | 9  | 813 |

|             |       |           |           |             |             |              |    |     |
|-------------|-------|-----------|-----------|-------------|-------------|--------------|----|-----|
| B3GALT2     | chr1  | 193155285 | 193157284 | 0.427478419 | 0.485134147 | -0.057655728 | 3  | 814 |
| NA          | chr7  | 45000009  | 45002008  | 0.94145772  | 0.848386077 | 0.093071643  | 1  | 815 |
| MAGEE2      | chrX  | 75004580  | 75006579  | 0.397211375 | 0.36034909  | 0.036862285  | 10 | 816 |
| NA          | chr17 | 48238138  | 48240137  | 0.307082202 | 0.271419519 | 0.035662683  | 5  | 817 |
| SPATS2      | chr12 | 49758867  | 49760866  | 0.107363626 | 0.14463213  | -0.037268504 | 5  | 818 |
| NA          | chr19 | 15869685  | 15871684  | 0.285813644 | 0.328884457 | -0.043070813 | 4  | 819 |
| MIR16-1     | chr13 | 50622698  | 50624697  | 0.462498798 | 0.513600962 | -0.051102164 | 1  | 820 |
| NA          | chr7  | 57711081  | 57713080  | 0.562320835 | 0.619705799 | -0.057384964 | 5  | 821 |
| OR2C1       | chr16 | 3404389   | 3406388   | 0.894008103 | 0.835732587 | 0.058275516  | 5  | 822 |
| NA          | chr9  | 132645950 | 132647949 | 0.444537157 | 0.501699626 | -0.057162469 | 3  | 823 |
| NA          | chr17 | 37235818  | 37237817  | 0.505234242 | 0.44647394  | 0.058760302  | 1  | 824 |
| CCDC149     | chr4  | 24981327  | 24983326  | 0.508055008 | 0.461861989 | 0.046193019  | 8  | 825 |
| NA          | chr7  | 62807739  | 62809738  | 0.639080846 | 0.553230797 | 0.085850049  | 3  | 826 |
| NA          | chr2  | 89165154  | 89167153  | 0.355801952 | 0.265054099 | 0.090747853  | 1  | 827 |
| TESPA1      | chr12 | 55378031  | 55380030  | 0.660289812 | 0.706695497 | -0.046405685 | 7  | 828 |
| NA          | chr9  | 137417528 | 137419527 | 0.340663628 | 0.407291189 | -0.066627561 | 1  | 829 |
| NA          | chr8  | 89337565  | 89339564  | 0.130794347 | 0.166269439 | -0.035475092 | 3  | 830 |
| NA          | chr5  | 111962633 | 111964632 | 0.650692039 | 0.721768967 | -0.071076928 | 1  | 831 |
| NA          | chr5  | 132153193 | 132155192 | 0.759325475 | 0.841942482 | -0.082617007 | 1  | 832 |
| NA          | chr6  | 34662594  | 34664593  | 0.332697548 | 0.379463837 | -0.046766289 | 6  | 833 |
| NA          | chr4  | 7939228   | 7941227   | 0.454750834 | 0.531554184 | -0.07680335  | 7  | 834 |
| LINC00698   | chr3  | 62934605  | 62936604  | 0.227450623 | 0.290920245 | -0.063469622 | 3  | 835 |
| ARHGEF6     | chrX  | 135863748 | 135865747 | 0.537203921 | 0.480823609 | 0.056380312  | 2  | 836 |
| GABBR2      | chr9  | 101470980 | 101472979 | 0.537924278 | 0.484594007 | 0.053330271  | 4  | 837 |
| NA          | chr9  | 41953080  | 41955079  | 0.178167342 | 0.21353484  | -0.035367498 | 2  | 838 |
| OR1L3       | chr9  | 125435815 | 125437814 | 0.343015085 | 0.401181109 | -0.058166024 | 3  | 839 |
| LINC00635   | chr3  | 107596441 | 107598440 | 0.814841535 | 0.904075066 | -0.089233531 | 3  | 840 |
| NA          | chr2  | 10856399  | 10858398  | 0.612605441 | 0.718340758 | -0.105735317 | 1  | 841 |
| NA          | chr12 | 53551870  | 53553869  | 0.633727954 | 0.681309585 | -0.047581631 | 2  | 842 |
| SMIM17      | chr19 | 57153013  | 57155012  | 0.711482079 | 0.645457465 | 0.066024613  | 4  | 843 |
| NA          | chr2  | 226262926 | 226264925 | 0.469660337 | 0.526526919 | -0.056866581 | 2  | 844 |
| PCDHGA2     | chr5  | 140717039 | 140719038 | 0.543939818 | 0.588657352 | -0.044717534 | 8  | 845 |
| SNORA10     | chr16 | 2011968   | 2013967   | 0.291872472 | 0.357878113 | -0.066005642 | 7  | 846 |
| AMBN        | chr4  | 71456473  | 71458472  | 0.531619479 | 0.586467979 | -0.0548485   | 3  | 847 |
| DPPA4       | chr3  | 109055920 | 109057919 | 0.658529512 | 0.742447822 | -0.08391831  | 6  | 848 |
| KRTAP20-2   | chr21 | 32006055  | 32008054  | 0.235916202 | 0.289445211 | -0.053529009 | 1  | 849 |
| NA          | chr8  | 21154217  | 21156216  | 0.817265917 | 0.901965094 | -0.084699177 | 2  | 850 |
| SLC36A4     | chr11 | 92930631  | 92932630  | 0.165026014 | 0.210651999 | -0.045625985 | 10 | 851 |
| DEFB112     | chr6  | 50015865  | 50017864  | 0.732234475 | 0.648911736 | 0.083322739  | 1  | 852 |
| NA          | chr17 | 43325704  | 43327703  | 0.461959294 | 0.416558682 | 0.045400612  | 1  | 853 |
| OR7D2       | chr19 | 9294779   | 9296778   | 0.323679301 | 0.23104323  | 0.092636071  | 1  | 854 |
| EPPIN-WFDC6 | chr20 | 44175566  | 44177565  | 0.537027793 | 0.572139823 | -0.03511203  | 5  | 855 |
| EPPIN       | chr20 | 44175892  | 44177891  | 0.537027793 | 0.572139823 | -0.03511203  | 5  | 856 |
| MAPK8IP2    | chr22 | 51037614  | 51039613  | 0.303277695 | 0.338373328 | -0.035095633 | 6  | 857 |
| MPP4        | chr2  | 202562918 | 202564917 | 0.715438535 | 0.792940933 | -0.077502398 | 4  | 858 |
| NA          | chr14 | 80440013  | 80442012  | 0.657262071 | 0.728191588 | -0.070929517 | 1  | 859 |
| IL8         | chr4  | 74604723  | 74606722  | 0.453908562 | 0.386414822 | 0.067493741  | 1  | 860 |
| NA          | chr13 | 88462988  | 88464987  | 0.319669599 | 0.392829746 | -0.073160147 | 1  | 861 |
| ZEB1        | chr10 | 31605924  | 31607923  | 0.090199967 | 0.130861714 | -0.040661746 | 11 | 862 |
| TRBV2       | chr7  | 141999247 | 142001246 | 0.707804835 | 0.785353285 | -0.07754845  | 2  | 863 |
| MMGT1       | chrX  | 135055723 | 135057722 | 0.447408514 | 0.505693214 | -0.0582847   | 5  | 864 |
| ETFA        | chr15 | 76603314  | 76605313  | 0.1994936   | 0.164553499 | 0.034940101  | 9  | 865 |
| TSPO        | chr22 | 43546020  | 43548019  | 0.509096592 | 0.558912725 | -0.049816133 | 10 | 866 |
| ZNF696      | chr8  | 144370346 | 144372345 | 0.429896263 | 0.479463604 | -0.049567341 | 5  | 867 |
| NA          | chr16 | 34714353  | 34716352  | 0.657140043 | 0.593404539 | 0.063735503  | 1  | 868 |
| KRTAP19-5   | chr21 | 31873936  | 31875935  | 0.439648157 | 0.500522311 | -0.060874154 | 5  | 869 |
| TUSC7       | chr3  | 116426753 | 116428752 | 0.520747842 | 0.593381108 | -0.072633266 | 3  | 870 |
| KALRN       | chr3  | 123797370 | 123799369 | 0.603696152 | 0.554735905 | 0.048960246  | 2  | 871 |
| NA          | chr4  | 189064034 | 189066033 | 0.744002337 | 0.823295931 | -0.079293594 | 1  | 872 |
| PALM2-AKAP2 | chr9  | 112541089 | 112543088 | 0.237915982 | 0.203166071 | 0.034749911  | 3  | 873 |
| AKAP2       | chr9  | 112541269 | 112543268 | 0.237915982 | 0.203166071 | 0.034749911  | 3  | 874 |
| OR4K13      | chr14 | 20502420  | 20504419  | 0.789506427 | 0.873544859 | -0.084038432 | 1  | 875 |
| NA          | chr9  | 66342622  | 66344621  | 0.661741033 | 0.597937399 | 0.063803634  | 1  | 876 |
| RNU7-76P    | chr7  | 46014538  | 46016537  | 0.292978969 | 0.400073319 | -0.107094351 | 1  | 877 |
| SCNN1G      | chr16 | 23192536  | 23194535  | 0.107464327 | 0.142033329 | -0.034569002 | 8  | 878 |
| NA          | chr8  | 1712169   | 1714168   | 0.098063601 | 0.134733562 | -0.036669961 | 4  | 879 |
| AKR1C2      | chr10 | 5059724   | 5061723   | 0.428081463 | 0.506035303 | -0.07795384  | 5  | 880 |
| CAPN1       | chr11 | 64946537  | 64948536  | 0.769672362 | 0.695898781 | 0.073773581  | 1  | 881 |



|           |       |           |           |             |             |              |    |     |
|-----------|-------|-----------|-----------|-------------|-------------|--------------|----|-----|
| NA        | chr6  | 41884765  | 41886764  | 0.759778712 | 0.840162848 | -0.080384137 | 1  | 882 |
| ADAL      | chr15 | 43621372  | 43623371  | 0.099572288 | 0.137922639 | -0.038350351 | 16 | 883 |
| LY6K      | chr8  | 143780029 | 143782028 | 0.556088443 | 0.590585225 | -0.034496781 | 9  | 884 |
| SLC9A3P3  | chr10 | 51786624  | 51788623  | 0.785668489 | 0.710551369 | 0.07511712   | 1  | 885 |
| CAPS2     | chr12 | 75784209  | 75786208  | 0.163731114 | 0.201179289 | -0.037448175 | 11 | 886 |
| DBNDD1    | chr16 | 90086037  | 90088036  | 0.155443518 | 0.189932863 | -0.034489344 | 4  | 887 |
| PDE2A     | chr11 | 72385136  | 72387135  | 0.694061545 | 0.638137289 | 0.055924256  | 5  | 888 |
| EGFL7     | chr9  | 139551808 | 139553807 | 0.580496491 | 0.543864732 | 0.036631759  | 3  | 889 |
| MAGI2-AS1 | chr7  | 78567666  | 78569665  | 0.731918469 | 0.661978186 | 0.069940283  | 1  | 890 |
| NA        | chr1  | 222627548 | 222629547 | 0.211422974 | 0.25188821  | -0.040465236 | 3  | 891 |
| ZNHIT3    | chr17 | 34840973  | 34842972  | 0.109793893 | 0.075426141 | 0.034367753  | 14 | 892 |
| KLK13     | chr19 | 51567872  | 51569871  | 0.666913339 | 0.714638094 | -0.047724755 | 9  | 893 |
| NA        | chr8  | 38004759  | 38006758  | 0.874600934 | 0.791313943 | 0.083286991  | 1  | 894 |
| CRNN      | chr1  | 152386240 | 152388239 | 0.834722947 | 0.922127537 | -0.08740459  | 2  | 895 |
| NA        | chr16 | 67465095  | 67467094  | 0.460858532 | 0.518292421 | -0.057433888 | 3  | 896 |
| NA        | chr17 | 38457957  | 38459956  | 0.731143615 | 0.661384071 | 0.069759543  | 1  | 897 |
| STPG1     | chr1  | 24742925  | 24744924  | 0.567187422 | 0.648588791 | -0.081401369 | 3  | 898 |
| SBK1      | chr16 | 28302340  | 28304339  | 0.140046768 | 0.174725229 | -0.034678461 | 6  | 899 |
| KCNC2     | chr12 | 75603149  | 75605148  | 0.3818765   | 0.304137765 | 0.077738735  | 6  | 900 |
| PTMS      | chr12 | 6873182   | 6875181   | 0.336582215 | 0.409234843 | -0.072652629 | 2  | 901 |
| NA        | chr10 | 20016980  | 20018979  | 0.589764978 | 0.651887292 | -0.062122314 | 1  | 902 |
| NA        | chr14 | 60386558  | 60388557  | 0.08312484  | 0.117295621 | -0.034170781 | 2  | 903 |
| MTM1      | chrX  | 149735569 | 149737568 | 0.573672538 | 0.621348035 | -0.047675497 | 9  | 904 |
| LINC00494 | chr20 | 46987193  | 46989192  | 0.673010429 | 0.722916274 | -0.049905845 | 4  | 905 |
| BAALC     | chr8  | 104151438 | 104153437 | 0.561640588 | 0.614496868 | -0.05285628  | 6  | 906 |
| PXT1      | chr6  | 36410167  | 36412166  | 0.098067479 | 0.132112856 | -0.034045377 | 14 | 907 |
| CDH17     | chr8  | 95229032  | 95231031  | 0.823082726 | 0.738693011 | 0.084389715  | 5  | 908 |
| RAB40A    | chrX  | 102773918 | 102775917 | 0.50382673  | 0.537834687 | -0.034007957 | 3  | 909 |
| PXMP4     | chr20 | 32307626  | 32309625  | 0.369808498 | 0.470225838 | -0.10041734  | 11 | 910 |
| ANKRD60   | chr20 | 56803210  | 56805209  | 0.782118167 | 0.71217013  | 0.069948038  | 7  | 911 |
| HOTTIP    | chr7  | 27236694  | 27238693  | 0.097923101 | 0.131870448 | -0.033947347 | 4  | 912 |
| NA        | chr17 | 21934222  | 21936221  | 0.636609353 | 0.693723351 | -0.057113998 | 5  | 913 |
| NA        | chr17 | 21933219  | 21935218  | 0.636609353 | 0.693723351 | -0.057113998 | 5  | 914 |
| NA        | chr17 | 21933458  | 21935457  | 0.636609353 | 0.693723351 | -0.057113998 | 5  | 915 |
| TEX22     | chr14 | 105863416 | 105865415 | 0.426585029 | 0.392689151 | 0.033895878  | 7  | 916 |
| ZNF880    | chr19 | 52871670  | 52873669  | 0.37413992  | 0.315534396 | 0.058605524  | 10 | 917 |
| KCTD20    | chr6  | 36409044  | 36411043  | 0.118089391 | 0.151980643 | -0.033891251 | 14 | 918 |
| PKIG      | chr20 | 43158926  | 43160925  | 0.628069323 | 0.695526473 | -0.06745715  | 8  | 919 |
| EHMT1     | chr9  | 140511944 | 140513943 | 0.125569397 | 0.169254204 | -0.043684807 | 5  | 920 |
| PRDM5     | chr4  | 121843526 | 121845525 | 0.226700904 | 0.192850721 | 0.033850182  | 9  | 921 |
| KRTAP4-9  | chr17 | 39260084  | 39262083  | 0.689020433 | 0.75374386  | -0.064723427 | 2  | 922 |
| OR5AK2    | chr11 | 56754847  | 56756846  | 0.234688985 | 0.320201414 | -0.085512428 | 1  | 923 |
| OR4X2     | chr11 | 48265108  | 48267107  | 0.558089881 | 0.383374686 | 0.174715195  | 1  | 924 |
| RN7SKP122 | chr5  | 107144830 | 107146829 | 0.409123078 | 0.451763919 | -0.04264084  | 1  | 925 |
| NA        | chr12 | 42325895  | 42327894  | 0.474252504 | 0.542160965 | -0.067908461 | 3  | 926 |
| FBXO6     | chr1  | 11722681  | 11724680  | 0.551398517 | 0.598883525 | -0.047485008 | 8  | 927 |
| DCAF10    | chr9  | 37798999  | 37800998  | 0.12352421  | 0.157178957 | -0.033654747 | 3  | 928 |
| MIR518C   | chr19 | 54210489  | 54212488  | 0.457068069 | 0.491912917 | -0.034844848 | 2  | 929 |
| HIST1H2AL | chr6  | 27831534  | 27833533  | 0.481795148 | 0.562391828 | -0.08059668  | 15 | 930 |
| NA        | chrX  | 70885104  | 70887103  | 0.520339349 | 0.581173312 | -0.060833963 | 2  | 931 |
| MIR889    | chr14 | 101512738 | 101514737 | 0.644502273 | 0.701035555 | -0.056533282 | 7  | 932 |
| ZNF200    | chr16 | 3285722   | 3287721   | 0.817419017 | 0.741432834 | 0.075986183  | 1  | 933 |
| SH3D19    | chr4  | 152246285 | 152248284 | 0.098811068 | 0.168266432 | -0.069455364 | 4  | 934 |
| NA        | chr4  | 189079719 | 189081718 | 0.764510879 | 0.820574638 | -0.056063759 | 4  | 935 |
| NA        | chr7  | 73398822  | 73400821  | 0.928395972 | 0.842316626 | 0.086079346  | 1  | 936 |
| EOGT      | chr3  | 69062613  | 69064612  | 0.124786491 | 0.15854756  | -0.033761069 | 8  | 937 |
| KRTAP13-1 | chr21 | 31766892  | 31768891  | 0.293329385 | 0.326718525 | -0.03338914  | 6  | 938 |
| EFR3A     | chr8  | 132914835 | 132916834 | 0.427383862 | 0.514756583 | -0.087372721 | 10 | 939 |
| NA        | chr16 | 1522186   | 1524185   | 0.963297713 | 0.874100513 | 0.0891972    | 1  | 940 |
| EEF1A1P25 | chr3  | 138542405 | 138544404 | 0.587818741 | 0.513295035 | 0.074523706  | 1  | 941 |
| MYCNOS    | chr2  | 16081872  | 16083871  | 0.36623181  | 0.316734754 | 0.049497056  | 7  | 942 |
| GPLD1     | chr6  | 24494934  | 24496933  | 0.202910267 | 0.236274355 | -0.033364088 | 7  | 943 |
| NAP1L6    | chrX  | 72347420  | 72349419  | 0.49786668  | 0.428906303 | 0.068960378  | 3  | 944 |
| KRTAP22-1 | chr21 | 31971914  | 31973913  | 0.314647822 | 0.359942711 | -0.045294889 | 4  | 945 |
| LCMT2     | chr15 | 43622304  | 43624303  | 0.061964282 | 0.115558525 | -0.053594243 | 14 | 946 |
| NA        | chr6  | 161350612 | 161352611 | 0.368712981 | 0.42559454  | -0.05688156  | 3  | 947 |
| LRRCL15   | chr3  | 194089973 | 194091972 | 0.572258247 | 0.538944337 | 0.03331391   | 8  | 948 |
| C12orf54  | chr12 | 48874786  | 48876785  | 0.666916902 | 0.726651857 | -0.059734955 | 4  | 949 |

|           |       |           |           |             |             |              |    |      |
|-----------|-------|-----------|-----------|-------------|-------------|--------------|----|------|
| LINC00682 | chr4  | 41884129  | 41886128  | 0.483615596 | 0.543989656 | -0.06037406  | 5  | 950  |
| MIR323B   | chr14 | 101521056 | 101523055 | 0.711996707 | 0.769717684 | -0.057720977 | 13 | 951  |
| EML6      | chr2  | 54949136  | 54951135  | 0.171665003 | 0.208783223 | -0.037118221 | 8  | 952  |
| ZNF592    | chr15 | 85290366  | 85292365  | 0.210618069 | 0.246813355 | -0.036195286 | 6  | 953  |
| KIR3DX1   | chr19 | 55042409  | 55044408  | 0.413918261 | 0.486307086 | -0.072388825 | 6  | 954  |
| ZNF131    | chr5  | 43063778  | 43065777  | 0.080051606 | 0.113256278 | -0.033204672 | 3  | 955  |
| PTPRT     | chr20 | 41818111  | 41820110  | 0.461247745 | 0.506849712 | -0.045601968 | 8  | 956  |
| TRIM9     | chr14 | 51562280  | 51564279  | 0.172613487 | 0.231297565 | -0.058684078 | 7  | 957  |
| FABP2     | chr4  | 120243046 | 120245045 | 0.457263301 | 0.521749826 | -0.064486525 | 3  | 958  |
| MAGEF1    | chr3  | 184429337 | 184431336 | 0.155514032 | 0.204425199 | -0.048911167 | 9  | 959  |
| NA        | chr2  | 16245464  | 16247463  | 0.932442221 | 0.846865821 | 0.085576401  | 1  | 960  |
| MIR137HG  | chr1  | 98514920  | 98516919  | 0.236110696 | 0.196338059 | 0.039772637  | 4  | 961  |
| TACR3     | chr4  | 104640474 | 104642473 | 0.310786014 | 0.343794033 | -0.033008019 | 12 | 962  |
| TPD52     | chr8  | 81142968  | 81144967  | 0.49108507  | 0.455966839 | 0.035118232  | 3  | 963  |
| SSTR3     | chr22 | 37607863  | 37609862  | 0.777614512 | 0.850897776 | -0.073283265 | 4  | 964  |
| KIAA1211L | chr2  | 99552223  | 99554222  | 0.394722628 | 0.427644168 | -0.03292154  | 11 | 965  |
| NA        | chr8  | 120886229 | 120888228 | 0.070317175 | 0.106004032 | -0.035686857 | 5  | 966  |
| NA        | chr4  | 13548926  | 13550925  | 0.146874565 | 0.179741676 | -0.032867111 | 11 | 967  |
| NA        | chr15 | 101400548 | 101402547 | 0.682965297 | 0.637141933 | 0.045823364  | 2  | 968  |
| ALDH1A3   | chr15 | 101400629 | 101402628 | 0.682965297 | 0.637141933 | 0.045823364  | 2  | 969  |
| SLC27A4   | chr9  | 131101425 | 131103424 | 0.137525804 | 0.177201103 | -0.039675299 | 4  | 970  |
| NA        | chr5  | 169756933 | 169758932 | 0.695833345 | 0.731543344 | -0.03571     | 6  | 971  |
| CYP4A11   | chr1  | 47406657  | 47408656  | 0.324153213 | 0.386336862 | -0.062183649 | 3  | 972  |
| F13A1     | chr6  | 6320747   | 6322746   | 0.473262706 | 0.514059702 | -0.040796996 | 7  | 973  |
| CAMSAP3   | chr19 | 7659288   | 7661287   | 0.081354537 | 0.114129861 | -0.032775324 | 6  | 974  |
| EBNA1BP2  | chr1  | 43736108  | 43738107  | 0.798765198 | 0.711398869 | 0.087366328  | 3  | 975  |
| UNKL      | chr16 | 1464253   | 1466252   | 0.245498865 | 0.278267528 | -0.032768663 | 8  | 976  |
| NA        | chr12 | 7283295   | 7285294   | 0.141910957 | 0.10915937  | 0.032751587  | 1  | 977  |
| CSN2      | chr4  | 70826226  | 70828225  | 0.453134466 | 0.499002171 | -0.045867705 | 1  | 978  |
| SMN2      | chr5  | 69343850  | 69345849  | 0.288851124 | 0.33989268  | -0.051041556 | 1  | 979  |
| NA        | chr20 | 39807596  | 39809595  | 0.784837228 | 0.713235496 | 0.071601732  | 1  | 980  |
| UBE2A     | chrX  | 118707001 | 118709000 | 0.518509376 | 0.565881749 | -0.047372373 | 13 | 981  |
| HMGXB4    | chr22 | 35651945  | 35653944  | 0.220332031 | 0.1836741   | 0.036657931  | 9  | 982  |
| NTRK3-AS1 | chr15 | 88794461  | 88796460  | 0.769293336 | 0.846138229 | -0.076844893 | 1  | 983  |
| DENND3    | chr8  | 142125877 | 142127876 | 0.827466741 | 0.909974878 | -0.082508136 | 1  | 984  |
| NA        | chr6  | 169562520 | 169564519 | 0.831595473 | 0.914463375 | -0.082867902 | 1  | 985  |
| SLC6A1    | chr3  | 11032910  | 11034909  | 0.164281449 | 0.196870604 | -0.032589155 | 11 | 986  |
| BMP2      | chr20 | 6746811   | 6748810   | 0.32392275  | 0.380660589 | -0.056737839 | 6  | 987  |
| NA        | chr12 | 131830515 | 131832514 | 0.776733879 | 0.838814764 | -0.062080884 | 2  | 988  |
| HOXB-AS1  | chr17 | 46619413  | 46621412  | 0.164529827 | 0.198961632 | -0.034431805 | 9  | 989  |
| ALDOA     | chr16 | 30062911  | 30064910  | 0.516307017 | 0.479463067 | 0.03684395   | 6  | 990  |
| SOST      | chr17 | 41835657  | 41837656  | 0.702407202 | 0.756455664 | -0.054048462 | 6  | 991  |
| NA        | chr6  | 135795248 | 135797247 | 0.607619133 | 0.727542524 | -0.119923391 | 1  | 992  |
| PCDHB16   | chr5  | 140559480 | 140561479 | 0.45191135  | 0.495810218 | -0.043898869 | 3  | 993  |
| NA        | chr8  | 123705846 | 123707845 | 0.726079961 | 0.798277387 | -0.072197426 | 1  | 994  |
| ASCL1     | chr12 | 103349964 | 103351963 | 0.281574104 | 0.233768898 | 0.047805206  | 10 | 995  |
| C10orf91  | chr10 | 134256331 | 134258330 | 0.615026922 | 0.674993715 | -0.059966793 | 2  | 996  |
| ZNF329    | chr19 | 58665978  | 58667977  | 0.398093403 | 0.448979693 | -0.050886291 | 5  | 997  |
| SPRR4     | chr1  | 152941642 | 152943641 | 0.459014722 | 0.555266233 | -0.096251511 | 8  | 998  |
| NSDHL     | chrX  | 151998011 | 152000010 | 0.476261098 | 0.508665547 | -0.032404449 | 14 | 999  |
| TRBV23-1  | chr7  | 142351968 | 142353967 | 0.706566593 | 0.738948336 | -0.032381743 | 4  | 1000 |

**Supplementary Table S2. List of the 1,000 top-ranked, differentially methylated gene bodies after induced overexpression of *TET1* .**This table is related to **Fig. 2B**. "NA" : No gene symbol provided.

| gene_symbol | chromosome | start     | end       | beta.TET1+Dox | beta.TET1-Dox | difference   | num.sites | rank |
|-------------|------------|-----------|-----------|---------------|---------------|--------------|-----------|------|
| NA          | chr5       | 121646992 | 121647368 | 0.215583301   | 0.471543758   | -0.255960458 | 2         | 1    |
| LINC00424   | chr13      | 22446909  | 22449705  | 0.336338211   | 0.660893691   | -0.324555479 | 1         | 2    |
| NA          | chr1       | 27995979  | 27996787  | 0.343914965   | 0.59769997    | -0.253785004 | 1         | 3    |
| NA          | chr1       | 13108842  | 13112679  | 0.270814596   | 0.509846635   | -0.239032039 | 1         | 4    |
| MIR100      | chr11      | 122022937 | 122023016 | 0.356190771   | 0.723647342   | -0.36745657  | 1         | 5    |
| NA          | chr16      | 21638063  | 21638723  | 0.386915096   | 0.641065122   | -0.254150026 | 1         | 6    |
| USP12-AS1   | chr13      | 27736992  | 27743272  | 0.39039492    | 0.64608486    | -0.25568994  | 1         | 7    |
| NA          | chr4       | 147162958 | 147164821 | 0.233784628   | 0.480026372   | -0.246241744 | 2         | 8    |
| ZNF726      | chr19      | 24097678  | 24127961  | 0.141953305   | 0.327020175   | -0.18506687  | 1         | 9    |
| PRKRIRP7    | chr8       | 79672377  | 79674666  | 0.339430918   | 0.145788105   | 0.193642813  | 1         | 10   |
| DEFB133     | chr6       | 49913814  | 49917157  | 0.225037558   | 0.39363274    | -0.168595181 | 2         | 11   |
| AKR1C6P     | chr10      | 4914093   | 4934167   | 0.197497691   | 0.396302977   | -0.198805287 | 1         | 12   |
| NA          | chr5       | 164647583 | 164668758 | 0.110214984   | 0.262008239   | -0.151793255 | 1         | 13   |
| RNA5SP42    | chr1       | 34578550  | 34578664  | 0.391115907   | 0.588939481   | -0.197823575 | 1         | 14   |
| NA          | chr2       | 155292365 | 155313950 | 0.161543093   | 0.307589903   | -0.14604681  | 1         | 15   |
| NA          | chr7       | 104944724 | 104947089 | 0.16700273    | 0.312822558   | -0.145819827 | 1         | 16   |
| NA          | chr8       | 134783652 | 134826780 | 0.167340383   | 0.372539408   | -0.205199025 | 1         | 17   |
| MROH9       | chr1       | 170904612 | 171033906 | 0.522698559   | 0.666302755   | -0.143604196 | 2         | 18   |
| SNORD109A   | chr15      | 25287065  | 25287575  | 0.567836579   | 0.36022288    | 0.207613698  | 1         | 19   |
| CABS1       | chr4       | 71200698  | 71202833  | 0.159029591   | 0.387320059   | -0.228290468 | 1         | 20   |
| NA          | chr16      | 33815861  | 33816297  | 0.143021156   | 0.339614572   | -0.196593415 | 1         | 21   |
| MIR647      | chr20      | 62573984  | 62574079  | 0.238631499   | 0.374134489   | -0.13550299  | 1         | 22   |
| SNTN        | chr3       | 63638344  | 63664696  | 0.406437567   | 0.673327653   | -0.266890086 | 1         | 23   |
| NA          | chr9       | 80071211  | 80141613  | 0.461798427   | 0.589837932   | -0.128039506 | 2         | 24   |
| KRTAP4-12   | chr17      | 39279343  | 39280419  | 0.378210321   | 0.56732251    | -0.189112189 | 1         | 25   |
| NA          | chr5       | 157600609 | 157603430 | 0.45661821    | 0.645226633   | -0.188608423 | 1         | 26   |
| NA          | chr5       | 157602404 | 157627024 | 0.45661821    | 0.645226633   | -0.188608423 | 1         | 27   |
| NA          | chr3       | 161144215 | 161166030 | 0.349217038   | 0.51329982    | -0.164082781 | 1         | 28   |
| NA          | chr9       | 132645972 | 132646449 | 0.414503255   | 0.584954954   | -0.170451699 | 1         | 29   |
| NA          | chr14      | 27244701  | 27291313  | 0.415607977   | 0.680297149   | -0.264689173 | 1         | 30   |
| LCE1E       | chr1       | 152758690 | 152760902 | 0.249351773   | 0.375327023   | -0.12597525  | 3         | 31   |
| NA          | chr3       | 158263009 | 158288855 | 0.544423573   | 0.426866084   | 0.11755749   | 5         | 32   |
| NA          | chr5       | 18704542  | 18746282  | 0.588806554   | 0.470120524   | 0.11868603   | 2         | 33   |
| TSPY13P     | chrY       | 9743204   | 9745748   | 0.396539801   | 0.281606303   | 0.114933498  | 1         | 34   |
| OR1E2       | chr17      | 3336164   | 3337135   | 0.269000307   | 0.382761544   | -0.113761237 | 2         | 35   |
| ALDOC       | chr17      | 26900133  | 26904282  | 0.268593441   | 0.386073075   | -0.117479634 | 9         | 36   |
| NA          | chr11      | 66032248  | 66033137  | 0.595370637   | 0.816795348   | -0.221424711 | 1         | 37   |
| NA          | chr17      | 40422535  | 40424701  | 0.79823675    | 0.582505651   | 0.215731099  | 1         | 38   |
| NA          | chr5       | 44753051  | 44765846  | 0.246521466   | 0.502847677   | -0.256326211 | 1         | 39   |
| IFI44       | chr1       | 79115481  | 79129763  | 0.550823843   | 0.749275687   | -0.198451845 | 1         | 40   |
| NA          | chr7       | 46184535  | 46185286  | 0.326214308   | 0.513224345   | -0.187010037 | 1         | 41   |
| OR4K5       | chr14      | 20388741  | 20389818  | 0.383070536   | 0.520239508   | -0.137168972 | 1         | 42   |
| NA          | chr12      | 79187306  | 79187894  | 0.372455367   | 0.563176391   | -0.190721023 | 1         | 43   |
| MIR485      | chr14      | 101521738 | 101521848 | 0.544979723   | 0.734636336   | -0.189656613 | 1         | 44   |
| NA          | chr6       | 19290550  | 19321252  | 0.490711364   | 0.665983263   | -0.175271899 | 2         | 45   |
| NA          | chr6       | 30484043  | 30486994  | 0.68864214    | 0.509350108   | 0.179292032  | 5         | 46   |
| ANKRD18EP   | chr6       | 39078097  | 39080728  | 0.211236362   | 0.315042136   | -0.103805774 | 1         | 47   |
| OR11H6      | chr14      | 20691791  | 20692964  | 0.444258517   | 0.599321031   | -0.155062515 | 1         | 48   |
| NA          | chr2       | 214141276 | 214148929 | 0.296860189   | 0.400373382   | -0.103513193 | 4         | 49   |
| RNU6-173P   | chr4       | 189042685 | 189042788 | 0.297431615   | 0.412957275   | -0.11552566  | 1         | 50   |
| NA          | chr19      | 57828576  | 57828930  | 0.320001486   | 0.193963198   | 0.126038288  | 1         | 51   |
| MIR518E     | chr19      | 54233092  | 54233179  | 0.295502857   | 0.405080921   | -0.109578064 | 1         | 52   |
| ADH7        | chr4       | 100333418 | 100356894 | 0.162191641   | 0.442765495   | -0.280573855 | 1         | 53   |
| NA          | chr6       | 112555366 | 112555959 | 0.531875805   | 0.710190202   | -0.178314397 | 1         | 54   |
| CNTN4-AS1   | chr3       | 3080717   | 3102829   | 0.722850149   | 0.589800326   | 0.133049823  | 3         | 55   |
| TRAT1       | chr3       | 108541545 | 108573852 | 0.197950643   | 0.34080076    | -0.142850118 | 1         | 56   |
| MYO16-AS1   | chr13      | 109816250 | 109853831 | 0.351806686   | 0.470191047   | -0.118384361 | 1         | 57   |
| UGT2B10     | chr4       | 69681711  | 69696914  | 0.216353361   | 0.373730151   | -0.15737679  | 1         | 58   |
| HNRNPDP2    | chr6       | 65341098  | 65341575  | 0.56156639    | 0.756302233   | -0.194735843 | 1         | 59   |
| LCE4A       | chr1       | 152680636 | 152681967 | 0.357710668   | 0.460057716   | -0.102347048 | 4         | 60   |
| OR6V1       | chr7       | 142749417 | 142750444 | 0.282512275   | 0.383046151   | -0.100533877 | 1         | 61   |

|             |       |           |           |             |             |              |   |     |
|-------------|-------|-----------|-----------|-------------|-------------|--------------|---|-----|
| OR1E1       | chr17 | 3300398   | 3301704   | 0.158426608 | 0.258677758 | -0.10025115  | 1 | 62  |
| WFDC12      | chr20 | 43752066  | 43753106  | 0.784002164 | 0.654596938 | 0.129405226  | 2 | 63  |
| NA          | chr11 | 94773575  | 94774735  | 0.907797198 | 0.687238407 | 0.22055879   | 1 | 64  |
| SNORD12B    | chr20 | 47896856  | 47896946  | 0.321547336 | 0.483299672 | -0.161752336 | 1 | 65  |
| NA          | chr17 | 50939481  | 50976948  | 0.478662512 | 0.577236965 | -0.098574453 | 2 | 66  |
| NA          | chr15 | 42873354  | 42873686  | 0.141199497 | 0.314547774 | -0.173348277 | 2 | 67  |
| NA          | chr8  | 65713793  | 65730130  | 0.795250211 | 0.605454622 | 0.189795589  | 1 | 68  |
| TNFAIP8L2   | chr1  | 151129105 | 151132225 | 0.756095827 | 0.852981672 | -0.096885845 | 4 | 69  |
| NA          | chr17 | 48235694  | 48238637  | 0.694013599 | 0.597767423 | 0.096246176  | 2 | 70  |
| NA          | chr11 | 116644105 | 116644921 | 0.172102452 | 0.077498442 | 0.094604011  | 1 | 71  |
| KRTAP6-2    | chr21 | 31970909  | 31971219  | 0.3746847   | 0.490658355 | -0.115973655 | 3 | 72  |
| OR6C72P     | chr12 | 55677534  | 55706860  | 0.279596516 | 0.459161158 | -0.179564642 | 1 | 73  |
| OR6C6       | chr12 | 55688072  | 55689016  | 0.279596516 | 0.459161158 | -0.179564642 | 1 | 74  |
| MBOAT4      | chr8  | 29989340  | 30002202  | 0.681341303 | 0.466859742 | 0.214481562  | 1 | 75  |
| KRTAP23-1   | chr21 | 31720717  | 31720924  | 0.338477903 | 0.441357645 | -0.102879742 | 1 | 76  |
| LCE1B       | chr1  | 152784447 | 152785585 | 0.46301964  | 0.57139399  | -0.10837435  | 2 | 77  |
| NA          | chr1  | 28843988  | 28844087  | 0.440127723 | 0.226502611 | 0.213625112  | 1 | 78  |
| NA          | chr3  | 55394471  | 55395857  | 0.702949948 | 0.497428555 | 0.205521393  | 1 | 79  |
| KRTAP27-1   | chr21 | 31709331  | 31710012  | 0.425307907 | 0.605389265 | -0.180081358 | 1 | 80  |
| NA          | chr7  | 126855181 | 126869975 | 0.188931626 | 0.32123062  | -0.132298994 | 1 | 81  |
| NA          | chr1  | 83439565  | 83451891  | 0.52901897  | 0.283819059 | 0.245199911  | 1 | 82  |
| NA          | chrX  | 70882845  | 70885603  | 0.23354824  | 0.352471232 | -0.118922991 | 1 | 83  |
| NA          | chr2  | 75751194  | 75769832  | 0.559674527 | 0.768224588 | -0.20855006  | 2 | 84  |
| NA          | chr14 | 52577840  | 52596343  | 0.674800529 | 0.869774027 | -0.194973498 | 1 | 85  |
| PPP2R2B-IT1 | chr5  | 146293770 | 146299069 | 0.139926348 | 0.28262042  | -0.142694072 | 1 | 86  |
| NA          | chr6  | 73972731  | 73972807  | 0.069409384 | 0.214850359 | -0.145440974 | 1 | 87  |
| NA          | chr3  | 137490791 | 137499720 | 0.438882174 | 0.535474871 | -0.096592697 | 7 | 88  |
| ZNF32       | chr10 | 44139307  | 44144304  | 0.383227417 | 0.486865848 | -0.103638431 | 4 | 89  |
| NA          | chr15 | 21941147  | 21968151  | 0.530961335 | 0.634632483 | -0.103671148 | 3 | 90  |
| NA          | chr12 | 90341470  | 90343503  | 0.291570682 | 0.378136954 | -0.086566271 | 1 | 91  |
| NA          | chr21 | 46798116  | 46799550  | 0.591202142 | 0.677207556 | -0.086005415 | 2 | 92  |
| HULC        | chr6  | 8652370   | 8654079   | 0.564264647 | 0.742375296 | -0.178110649 | 1 | 93  |
| NA          | chr1  | 209541007 | 209553035 | 0.545289249 | 0.687778386 | -0.142489137 | 2 | 94  |
| NA          | chr17 | 31438876  | 31458761  | 0.279631754 | 0.364718719 | -0.085086966 | 1 | 95  |
| PRKRIRP2    | chr3  | 86061711  | 86064270  | 0.410442286 | 0.521528804 | -0.111086519 | 1 | 96  |
| NA          | chr14 | 76702160  | 76729817  | 0.264886844 | 0.366422633 | -0.101535789 | 1 | 97  |
| NA          | chr8  | 49502961  | 49507181  | 0.342282791 | 0.47816275  | -0.135879959 | 1 | 98  |
| TAS2R38     | chr7  | 141672431 | 141673573 | 0.568370974 | 0.65879565  | -0.090424676 | 2 | 99  |
| NA          | chr12 | 116248164 | 116323942 | 0.847193086 | 0.668270679 | 0.178922407  | 1 | 100 |
| LCE1C       | chr1  | 152777311 | 152779107 | 0.390379191 | 0.537884484 | -0.147505293 | 2 | 101 |
| NA          | chr16 | 64398684  | 64634150  | 0.186877698 | 0.290222735 | -0.103345036 | 2 | 102 |
| NA          | chr3  | 108895285 | 108896212 | 0.623272215 | 0.788322711 | -0.165050497 | 1 | 103 |
| NA          | chr16 | 28873487  | 28874661  | 0.237937145 | 0.338171621 | -0.100234475 | 1 | 104 |
| LARP1BP1    | chr4  | 64215832  | 64217190  | 0.476326614 | 0.588592322 | -0.112265708 | 2 | 105 |
| NA          | chr2  | 234602080 | 234617345 | 0.600722502 | 0.767944882 | -0.16722238  | 2 | 106 |
| MAST4-AS1   | chr5  | 66297211  | 66299781  | 0.15643913  | 0.260674784 | -0.104235654 | 1 | 107 |
| LINC00898   | chr22 | 48016792  | 48027318  | 0.748081029 | 0.909072878 | -0.160991849 | 2 | 108 |
| SNORA69     | chrX  | 118921316 | 118921447 | 0.178096415 | 0.344683956 | -0.166587541 | 1 | 109 |
| NA          | chr10 | 92162278  | 92300562  | 0.590807767 | 0.691873977 | -0.10106621  | 2 | 110 |
| LPAL2       | chr6  | 160874460 | 160932156 | 0.484751706 | 0.572546526 | -0.08779482  | 4 | 111 |
| NA          | chr3  | 71634094  | 71636560  | 0.578330294 | 0.72979373  | -0.151463436 | 1 | 112 |
| PF4V1       | chr4  | 74718906  | 74719872  | 0.433144261 | 0.582972533 | -0.149828272 | 6 | 113 |
| ABCA10      | chr17 | 67143355  | 67240987  | 0.535260991 | 0.671412314 | -0.136151323 | 2 | 114 |
| NA          | chr9  | 107753077 | 107754062 | 0.087906528 | 0.169391382 | -0.081484854 | 1 | 115 |
| OR52E6      | chr11 | 5862158   | 5863182   | 0.484743546 | 0.787624802 | -0.302881256 | 1 | 116 |
| NAV2-IT1    | chr11 | 19402031  | 19406561  | 0.647664357 | 0.814213954 | -0.166549597 | 1 | 117 |
| NA          | chr12 | 50302665  | 50305646  | 0.552945571 | 0.694109867 | -0.141164297 | 1 | 118 |
| NA          | chr7  | 53723202  | 53879624  | 0.488034533 | 0.601545765 | -0.113511232 | 4 | 119 |
| TRAV12-3    | chr14 | 22433680  | 22434290  | 0.557900442 | 0.758800636 | -0.200900194 | 1 | 120 |
| NA          | chr16 | 56126899  | 56225006  | 0.33093208  | 0.425468101 | -0.094536021 | 7 | 121 |
| OSBPL10-AS1 | chr3  | 31745550  | 31763144  | 0.609447448 | 0.760969267 | -0.151521818 | 1 | 122 |
| NA          | chr12 | 114676775 | 114679575 | 0.471950903 | 0.589780375 | -0.117829472 | 1 | 123 |
| NA          | chr10 | 120968043 | 120971272 | 0.277260822 | 0.360549316 | -0.083288495 | 3 | 124 |
| MIR105-2    | chrX  | 151562884 | 151562964 | 0.165779905 | 0.243066791 | -0.077286886 | 1 | 125 |
| NA          | chr15 | 69884468  | 69988089  | 0.395883277 | 0.49313114  | -0.097247863 | 1 | 126 |

|             |       |           |           |             |             |              |   |     |
|-------------|-------|-----------|-----------|-------------|-------------|--------------|---|-----|
| NA          | chr19 | 32516768  | 32547771  | 0.074159729 | 0.151077058 | -0.076917328 | 3 | 127 |
| NA          | chr4  | 66868999  | 66882510  | 0.20210199  | 0.303893692 | -0.101791702 | 1 | 128 |
| NA          | chr17 | 32581900  | 32582306  | 0.145680557 | 0.23780805  | -0.092127492 | 3 | 129 |
| OR1I1       | chr19 | 15197791  | 15199032  | 0.741208022 | 0.919279972 | -0.178071951 | 1 | 130 |
| SPANXA2-OT1 | chrX  | 140590843 | 140738057 | 0.377170654 | 0.604684169 | -0.227513514 | 1 | 131 |
| NA          | chr16 | 9535151   | 9538842   | 0.863746166 | 0.69777231  | 0.165973856  | 1 | 132 |
| TAS2R8      | chr12 | 10958650  | 10959892  | 0.579226431 | 0.467330028 | 0.111896402  | 1 | 133 |
| NA          | chr3  | 196263403 | 196263573 | 0.366378213 | 0.454533684 | -0.088155471 | 1 | 134 |
| KRTAP19-3   | chr21 | 31863782  | 31864275  | 0.40119424  | 0.510765429 | -0.109571189 | 2 | 135 |
| NA          | chr5  | 4866634   | 4874872   | 0.301797877 | 0.377221485 | -0.075423608 | 2 | 136 |
| NA          | chr14 | 90095265  | 90109015  | 0.797077731 | 0.644223477 | 0.152854254  | 1 | 137 |
| NA          | chr4  | 150587209 | 150632301 | 0.34995631  | 0.43403251  | -0.0840762   | 1 | 138 |
| NA          | chr4  | 158125614 | 158126007 | 0.12942643  | 0.204561265 | -0.075134835 | 2 | 139 |
| KRTAP19-6   | chr21 | 31913854  | 31914183  | 0.451327871 | 0.564224864 | -0.112896993 | 1 | 140 |
| KCNH1-IT1   | chr1  | 211305930 | 211306716 | 0.83028015  | 0.672647505 | 0.157632645  | 1 | 141 |
| EIF3CL      | chr16 | 28390900  | 28415200  | 0.315597366 | 0.240940121 | 0.074657245  | 1 | 142 |
| STC1        | chr8  | 23699428  | 23712320  | 0.347515227 | 0.421856996 | -0.074341769 | 3 | 143 |
| LDLRAD1     | chr1  | 54474412  | 54483856  | 0.631102819 | 0.743444966 | -0.112342146 | 3 | 144 |
| NLRP5       | chr19 | 56511092  | 56573179  | 0.215878098 | 0.347588996 | -0.131710898 | 2 | 145 |
| GPX8        | chr5  | 54455946  | 54462899  | 0.362530153 | 0.436037237 | -0.073507084 | 2 | 146 |
| NA          | chr14 | 91163677  | 91165718  | 0.117602702 | 0.231472622 | -0.113869921 | 1 | 147 |
| NA          | chr16 | 24672743  | 24682383  | 0.155622355 | 0.229102428 | -0.073480074 | 1 | 148 |
| OR1N1       | chr9  | 125288637 | 125289572 | 0.120742614 | 0.267759916 | -0.147017302 | 1 | 149 |
| DEFA10P     | chr8  | 6825663   | 6826635   | 0.484154935 | 0.595003224 | -0.110848289 | 1 | 150 |
| SNORD115-23 | chr15 | 25456943  | 25457024  | 0.365640832 | 0.449663449 | -0.084022617 | 1 | 151 |
| CARD6       | chr5  | 40841286  | 40860275  | 0.269699454 | 0.348539727 | -0.078840272 | 6 | 152 |
| NA          | chr19 | 51891543  | 51893828  | 0.728441846 | 0.632167654 | 0.096274192  | 2 | 153 |
| RARRES2P9   | chr16 | 34578462  | 34578930  | 0.575452245 | 0.430186482 | 0.145265763  | 1 | 154 |
| NA          | chr11 | 5265784   | 5266777   | 0.650214535 | 0.46443616  | 0.185778375  | 1 | 155 |
| C4orf6      | chr4  | 5526296   | 5529528   | 0.472210988 | 0.584982334 | -0.112771346 | 5 | 156 |
| NA          | chr12 | 81156933  | 81164496  | 0.875974761 | 0.718108473 | 0.157866289  | 1 | 157 |
| NA          | chr11 | 96461317  | 96584822  | 0.327870754 | 0.444845897 | -0.116975143 | 2 | 158 |
| NA          | chr15 | 93960079  | 93965805  | 0.197925957 | 0.315086813 | -0.117160856 | 1 | 159 |
| OXCT1-AS1   | chr5  | 41870132  | 41871059  | 0.326376411 | 0.412767809 | -0.086391398 | 9 | 160 |
| MROH2B      | chr5  | 40998119  | 41071444  | 0.143516061 | 0.260862324 | -0.117346263 | 2 | 161 |
| CLEC5A      | chr7  | 141627157 | 141646807 | 0.6628762   | 0.749968477 | -0.087092278 | 5 | 162 |
| MIR514A1    | chrX  | 146360765 | 146360862 | 0.739708236 | 0.896984396 | -0.15727616  | 1 | 163 |
| NTF6A       | chr19 | 49528718  | 49529277  | 0.633939102 | 0.52279486  | 0.111144241  | 1 | 164 |
| OR5A1       | chr11 | 59210617  | 59211667  | 0.444983101 | 0.537408523 | -0.092425422 | 3 | 165 |
| NA          | chr12 | 92860227  | 92885867  | 0.343045219 | 0.45629318  | -0.113247961 | 2 | 166 |
| CYP4F22     | chr19 | 15619304  | 15663127  | 0.50461871  | 0.572836352 | -0.068217642 | 9 | 167 |
| NA          | chr4  | 49550935  | 49551452  | 0.671856203 | 0.555620547 | 0.116235656  | 1 | 168 |
| NA          | chr1  | 78695283  | 78835149  | 0.623078044 | 0.72918174  | -0.106103697 | 5 | 169 |
| SNORA48     | chr17 | 7478031   | 7478165   | 0.367344505 | 0.444421802 | -0.077077297 | 1 | 170 |
| NA          | chr3  | 2004065   | 2029154   | 0.348359249 | 0.546953981 | -0.198594731 | 1 | 171 |
| PASD1       | chrX  | 150732094 | 150845211 | 0.428102427 | 0.514869978 | -0.086767551 | 3 | 172 |
| NA          | chr20 | 5451853   | 5455828   | 0.685948395 | 0.54139119  | 0.144557205  | 1 | 173 |
| MYD88       | chr3  | 38179969  | 38184513  | 0.504316129 | 0.619999181 | -0.115683052 | 8 | 174 |
| NA          | chr1  | 147249700 | 147261065 | 0.111769713 | 0.178893041 | -0.067123328 | 1 | 175 |
| NA          | chr19 | 53426635  | 53427328  | 0.35675883  | 0.430453965 | -0.073695135 | 1 | 176 |
| CMA1        | chr14 | 24974559  | 24977471  | 0.513299606 | 0.618339963 | -0.105040357 | 1 | 177 |
| NA          | chr19 | 52022985  | 52023514  | 0.186372343 | 0.283805902 | -0.097433559 | 1 | 178 |
| CTSG        | chr14 | 25042728  | 25045466  | 0.436620273 | 0.505156846 | -0.068536573 | 5 | 179 |
| RDH8        | chr19 | 10123925  | 10132955  | 0.568015727 | 0.681806697 | -0.11379097  | 4 | 180 |
| SMCP        | chr1  | 152850793 | 152857523 | 0.51762225  | 0.626787949 | -0.109165699 | 5 | 181 |
| NA          | chr5  | 23303674  | 23305252  | 0.59261103  | 0.681334725 | -0.088723695 | 4 | 182 |
| ISX         | chr22 | 35462129  | 35483380  | 0.561319509 | 0.664716802 | -0.103397293 | 3 | 183 |
| NA          | chr1  | 2257640   | 2258132   | 0.711831623 | 0.854280962 | -0.142449339 | 1 | 184 |
| NA          | chr9  | 76089294  | 76090989  | 0.577460753 | 0.737273073 | -0.15981232  | 1 | 185 |
| NA          | chr7  | 150725868 | 150726841 | 0.639746127 | 0.767686782 | -0.127940655 | 1 | 186 |
| IFI16       | chr1  | 158969758 | 159024945 | 0.275237999 | 0.346274315 | -0.071036317 | 9 | 187 |
| IGHV3-21    | chr14 | 106691673 | 106692203 | 0.321339923 | 0.488395218 | -0.167055295 | 1 | 188 |
| GATSL2      | chr7  | 74807499  | 74867509  | 0.173141094 | 0.274325096 | -0.101184003 | 1 | 189 |
| NA          | chr14 | 24970800  | 24977894  | 0.302637439 | 0.367116202 | -0.064478762 | 2 | 190 |
| MMP8        | chr11 | 102582526 | 102597781 | 0.811605298 | 0.703131496 | 0.108473802  | 2 | 191 |

|             |       |           |           |             |             |              |    |     |
|-------------|-------|-----------|-----------|-------------|-------------|--------------|----|-----|
| STAU2-AS1   | chr8  | 74332239  | 74353761  | 0.236357758 | 0.333395451 | -0.097037693 | 5  | 192 |
| HIST1H2AL   | chr6  | 27833034  | 27833606  | 0.489764861 | 0.591924222 | -0.102159361 | 7  | 193 |
| RELN        | chr7  | 103112231 | 103629963 | 0.49287631  | 0.556829789 | -0.063953479 | 14 | 194 |
| MIR648      | chr22 | 18463634  | 18463727  | 0.374557592 | 0.50826036  | -0.133702768 | 1  | 195 |
| CD163       | chr12 | 7623409   | 7656489   | 0.649384596 | 0.544308805 | 0.105075791  | 1  | 196 |
| LSMEM1      | chr7  | 112120908 | 112131117 | 0.650865576 | 0.751565647 | -0.100700071 | 5  | 197 |
| NA          | chr11 | 28700730  | 28705016  | 0.673394262 | 0.479415716 | 0.193978547  | 1  | 198 |
| NA          | chr7  | 46930223  | 47089276  | 0.663436772 | 0.740337899 | -0.076901127 | 6  | 199 |
| NA          | chrX  | 36975986  | 36976212  | 0.434431446 | 0.531108517 | -0.096677071 | 3  | 200 |
| NA          | chr1  | 71172136  | 71252151  | 0.671010496 | 0.798269521 | -0.127259025 | 1  | 201 |
| NA          | chr16 | 10670356  | 10672040  | 0.628418114 | 0.70507028  | -0.076652166 | 2  | 202 |
| NA          | chr7  | 30589833  | 30591185  | 0.468707162 | 0.558132768 | -0.089425606 | 1  | 203 |
| TRBV23-1    | chr7  | 142353468 | 142353964 | 0.529455117 | 0.602115284 | -0.072660166 | 2  | 204 |
| SLAMF6      | chr1  | 160454820 | 160493052 | 0.396947995 | 0.459970769 | -0.063022774 | 3  | 205 |
| NA          | chr5  | 7290936   | 7296458   | 0.49903577  | 0.593814159 | -0.094778389 | 1  | 206 |
| OR1A1       | chr17 | 3118915   | 3119844   | 0.277491325 | 0.376928972 | -0.099437646 | 1  | 207 |
| PPP1R17     | chr7  | 31726329  | 31748069  | 0.609734619 | 0.67603798  | -0.066303361 | 9  | 208 |
| MIR376C     | chr14 | 101506017 | 101506102 | 0.544638171 | 0.647309795 | -0.102671624 | 1  | 209 |
| OR9I1       | chr11 | 57885972  | 57886916  | 0.428015041 | 0.593717001 | -0.16570196  | 1  | 210 |
| MIR105-1    | chrX  | 151560691 | 151560771 | 0.287074852 | 0.374566884 | -0.087492031 | 1  | 211 |
| CSTF2       | chrX  | 100075384 | 100095921 | 0.509157264 | 0.579668423 | -0.070511159 | 3  | 212 |
| ZFP42       | chr4  | 188916925 | 188926204 | 0.630739268 | 0.754043413 | -0.123304145 | 10 | 213 |
| NA          | chr2  | 105027659 | 105032070 | 0.183824633 | 0.24539149  | -0.061566857 | 1  | 214 |
| SNORD115-33 | chr15 | 25475985  | 25476066  | 0.318028299 | 0.410073089 | -0.09204479  | 1  | 215 |
| TBC1D26     | chr17 | 15635561  | 15649476  | 0.659150722 | 0.532495124 | 0.126655598  | 2  | 216 |
| KERA        | chr12 | 91444268  | 91451760  | 0.396694858 | 0.53871267  | -0.142017812 | 1  | 217 |
| OR4N5       | chr14 | 20611895  | 20612821  | 0.262734705 | 0.42565986  | -0.162925154 | 1  | 218 |
| XG          | chrX  | 2670091   | 2734539   | 0.371529099 | 0.432378222 | -0.060849123 | 4  | 219 |
| NA          | chr22 | 27299255  | 27316574  | 0.558974134 | 0.498236927 | 0.060737207  | 2  | 220 |
| CCDC129     | chr7  | 31553704  | 31698334  | 0.493418234 | 0.574737893 | -0.081319659 | 10 | 221 |
| NA          | chr17 | 15179879  | 15182794  | 0.789157121 | 0.931805909 | -0.142648788 | 1  | 222 |
| NA          | chr16 | 8947169   | 8948204   | 0.861357437 | 0.729985056 | 0.131372381  | 1  | 223 |
| NA          | chr16 | 27078249  | 27079179  | 0.307385292 | 0.381258041 | -0.073872748 | 1  | 224 |
| NA          | chr4  | 40318502  | 40332436  | 0.236915647 | 0.147298023 | 0.089617624  | 3  | 225 |
| RPS26P49    | chr14 | 105297175 | 105297508 | 0.300035372 | 0.192829986 | 0.107205386  | 1  | 226 |
| PTCHD3P3    | chr6  | 109609774 | 109611706 | 0.619005525 | 0.687315496 | -0.068309971 | 2  | 227 |
| MIR130B     | chr22 | 22007593  | 22007674  | 0.762996969 | 0.899292269 | -0.1362953   | 1  | 228 |
| NA          | chr11 | 111322064 | 111328876 | 0.281931664 | 0.364578767 | -0.082647103 | 1  | 229 |
| NA          | chr12 | 14818589  | 14910897  | 0.618487657 | 0.692094263 | -0.073606607 | 8  | 230 |
| NA          | chr1  | 204100190 | 204101094 | 0.439462819 | 0.517885296 | -0.078422477 | 1  | 231 |
| EPGN        | chr4  | 75174190  | 75181024  | 0.684264433 | 0.804793618 | -0.120529186 | 1  | 232 |
| GIMAP4      | chr7  | 150264365 | 150271041 | 0.486431313 | 0.544998073 | -0.05856676  | 4  | 233 |
| CTAGE14P    | chr2  | 168570173 | 168572575 | 0.609000347 | 0.669721849 | -0.060721503 | 3  | 234 |
| NA          | chrX  | 122867024 | 122868144 | 0.381521124 | 0.482638127 | -0.101117003 | 1  | 235 |
| IGFL1       | chr19 | 46733009  | 46734500  | 0.722117696 | 0.618978303 | 0.103139393  | 3  | 236 |
| NA          | chr3  | 158500336 | 158500913 | 0.307859169 | 0.412842982 | -0.104983813 | 1  | 237 |
| NA          | chr8  | 39761294  | 39852767  | 0.447416215 | 0.513445733 | -0.066029518 | 18 | 238 |
| FAM92A1P2   | chr4  | 183958818 | 183961272 | 0.685211825 | 0.80513095  | -0.119919125 | 1  | 239 |
| MAGEB3      | chrX  | 30248553  | 30255607  | 0.318720413 | 0.426332431 | -0.107612018 | 5  | 240 |
| NA          | chr8  | 42560726  | 42577089  | 0.251830646 | 0.368613976 | -0.11678333  | 1  | 241 |
| MIR518C     | chr19 | 54211989  | 54212089  | 0.108387866 | 0.16645225  | -0.058064384 | 1  | 242 |
| NA          | chr5  | 70741443  | 70742396  | 0.102323942 | 0.160289687 | -0.057965745 | 1  | 243 |
| NA          | chr11 | 117704434 | 117709657 | 0.734023915 | 0.624876364 | 0.109147551  | 1  | 244 |
| GATSL3      | chr22 | 30681106  | 30685616  | 0.267012567 | 0.324901243 | -0.057888676 | 4  | 245 |
| NA          | chr15 | 87482028  | 87531657  | 0.343330619 | 0.460466341 | -0.117135721 | 1  | 246 |
| NA          | chr1  | 69521581  | 69650686  | 0.452244253 | 0.526708144 | -0.074463892 | 4  | 247 |
| KLK13       | chr19 | 51559463  | 51568371  | 0.49768579  | 0.579023488 | -0.081337698 | 5  | 248 |
| NA          | chr16 | 83754724  | 83806541  | 0.720860456 | 0.844577577 | -0.123717122 | 1  | 249 |
| HTN1        | chr4  | 70916119  | 70924562  | 0.380824458 | 0.448671878 | -0.06784742  | 2  | 250 |
| NA          | chr12 | 65996649  | 66006777  | 0.267856882 | 0.395410786 | -0.127553905 | 1  | 251 |
| SIGLEC14    | chr19 | 52145806  | 52150054  | 0.374835061 | 0.508266654 | -0.133431593 | 2  | 252 |
| KRTAP19-1   | chr21 | 31852018  | 31852663  | 0.254471977 | 0.328563691 | -0.074091714 | 1  | 253 |
| DPPA2       | chr3  | 109012635 | 109035364 | 0.764863451 | 0.895260048 | -0.130396597 | 3  | 254 |
| NA          | chrX  | 28589649  | 28604512  | 0.504416203 | 0.628737472 | -0.124321269 | 1  | 255 |
| GCG         | chr2  | 162999392 | 163008914 | 0.619589166 | 0.724282336 | -0.10469317  | 2  | 256 |

|            |       |           |           |             |             |              |    |     |
|------------|-------|-----------|-----------|-------------|-------------|--------------|----|-----|
| KRT18P42   | chr5  | 108924039 | 108925293 | 0.661753511 | 0.774130354 | -0.112376843 | 1  | 257 |
| NA         | chr14 | 104603487 | 104604235 | 0.170608868 | 0.226814562 | -0.056205693 | 2  | 258 |
| SLC2A3     | chr12 | 8071826   | 8088871   | 0.3552381   | 0.438416279 | -0.083178179 | 3  | 259 |
| NA         | chr1  | 24393264  | 24410055  | 0.54018714  | 0.631749026 | -0.091561886 | 1  | 260 |
| NA         | chr11 | 19732480  | 19734165  | 0.277961335 | 0.363663547 | -0.085702212 | 4  | 261 |
| TRIML2     | chr4  | 189012427 | 189030757 | 0.567805835 | 0.677696299 | -0.109890463 | 10 | 262 |
| NA         | chr7  | 49269733  | 49294412  | 0.689121938 | 0.551428213 | 0.137693725  | 1  | 263 |
| GPX1P2     | chr21 | 28515663  | 28516268  | 0.424179201 | 0.506073885 | -0.081894684 | 3  | 264 |
| OGFOD1     | chr16 | 56485402  | 56513012  | 0.120316508 | 0.175529063 | -0.055212554 | 7  | 265 |
| TAF13      | chr1  | 109605108 | 109618624 | 0.275417801 | 0.330484084 | -0.055066283 | 4  | 266 |
| NA         | chr12 | 70107413  | 70132348  | 0.451620841 | 0.506623091 | -0.055002249 | 5  | 267 |
| KIAA0125   | chr14 | 106383838 | 106391825 | 0.185505799 | 0.261840107 | -0.076334308 | 1  | 268 |
| NA         | chr16 | 34711785  | 34714852  | 0.617515058 | 0.719892288 | -0.10237723  | 1  | 269 |
| NA         | chr16 | 60393746  | 60476149  | 0.354324161 | 0.426071962 | -0.0717478   | 3  | 270 |
| MIR2117    | chr17 | 41522075  | 41528568  | 0.575917559 | 0.385876223 | 0.190041336  | 1  | 271 |
| NA         | chr1  | 61125303  | 61291256  | 0.627606978 | 0.731560559 | -0.10395358  | 1  | 272 |
| NA         | chr6  | 19690056  | 19753344  | 0.71861205  | 0.810647506 | -0.092035456 | 9  | 273 |
| NA         | chr1  | 43820355  | 43824329  | 0.257913077 | 0.316773054 | -0.058859978 | 3  | 274 |
| SERPINB2   | chr18 | 61538926  | 61571124  | 0.7499493   | 0.815824618 | -0.065875318 | 5  | 275 |
| NA         | chr16 | 32019759  | 32096106  | 0.502196487 | 0.609182573 | -0.106986086 | 3  | 276 |
| PRAMEF12   | chr1  | 12834984  | 12838049  | 0.45753836  | 0.529516651 | -0.071978291 | 2  | 277 |
| NA         | chr4  | 189659506 | 189660648 | 0.701247271 | 0.810284089 | -0.109036818 | 2  | 278 |
| NA         | chr6  | 114844615 | 114857039 | 0.595188828 | 0.733638833 | -0.138450005 | 1  | 279 |
| POU5F1P6   | chr3  | 128393578 | 128395848 | 0.63566149  | 0.739191406 | -0.103529916 | 1  | 280 |
| KRTAP5-9   | chr11 | 71259466  | 71260653  | 0.735854032 | 0.825600988 | -0.089746955 | 2  | 281 |
| NA         | chr17 | 21760934  | 21792968  | 0.65752792  | 0.763533769 | -0.10600585  | 1  | 282 |
| NA         | chr7  | 57888037  | 57896752  | 0.587144113 | 0.650380538 | -0.063236425 | 2  | 283 |
| SPZ1       | chr5  | 79615444  | 79617661  | 0.768904016 | 0.686929066 | 0.08197495   | 2  | 284 |
| NA         | chr3  | 82035289  | 82512826  | 0.458095815 | 0.522773811 | -0.064677996 | 6  | 285 |
| NA         | chr6  | 75239964  | 75443995  | 0.184842861 | 0.241558    | -0.056715139 | 2  | 286 |
| NA         | chr21 | 46222492  | 46224632  | 0.633761107 | 0.734966049 | -0.101204942 | 1  | 287 |
| NA         | chr8  | 32623643  | 32625477  | 0.338045915 | 0.412539274 | -0.07449336  | 1  | 288 |
| SNORD114-9 | chr14 | 101432366 | 101432437 | 0.604533226 | 0.460715424 | 0.143817802  | 1  | 289 |
| SNORD71    | chr16 | 71792305  | 71792390  | 0.716107333 | 0.829818133 | -0.1137108   | 1  | 290 |
| PGM5P1     | chr9  | 68741234  | 68809906  | 0.455858489 | 0.551602669 | -0.09574418  | 1  | 291 |
| MIR29A     | chr7  | 130561495 | 130561580 | 0.822554057 | 0.710184485 | 0.112369572  | 1  | 292 |
| NA         | chr17 | 8261731   | 8263538   | 0.693619981 | 0.803396768 | -0.109776787 | 1  | 293 |
| PDE6H      | chr12 | 15125956  | 15134799  | 0.770099565 | 0.872614997 | -0.102515432 | 2  | 294 |
| NA         | chr11 | 105028654 | 105402424 | 0.375864108 | 0.429329319 | -0.053465212 | 3  | 295 |
| RXRG       | chr1  | 165370159 | 165414433 | 0.331174487 | 0.398457337 | -0.06728285  | 4  | 296 |
| ZNF510     | chr9  | 99518147  | 99540411  | 0.550938055 | 0.60257112  | -0.051633065 | 5  | 297 |
| GZMB       | chr14 | 25100160  | 25103473  | 0.578885307 | 0.660240842 | -0.081355534 | 2  | 298 |
| NA         | chr15 | 39048755  | 39051614  | 0.523259845 | 0.396470902 | 0.126788943  | 1  | 299 |
| NA         | chr12 | 56032696  | 56053579  | 0.418935182 | 0.490767171 | -0.071831989 | 8  | 300 |
| RAB39B     | chrX  | 154487526 | 154493874 | 0.58950132  | 0.644202938 | -0.054701618 | 7  | 301 |
| NA         | chr9  | 38360424  | 38376427  | 0.526278926 | 0.390022538 | 0.136256387  | 1  | 302 |
| NA         | chr13 | 113663985 | 113664633 | 0.60391255  | 0.697573849 | -0.093661299 | 1  | 303 |
| NA         | chr2  | 177494317 | 177502659 | 0.601153384 | 0.658962639 | -0.057809255 | 3  | 304 |
| MAGEB6     | chrX  | 26210557  | 26213763  | 0.615590665 | 0.70287404  | -0.087283375 | 4  | 305 |
| NA         | chr7  | 141811549 | 141922124 | 0.540923004 | 0.614776424 | -0.07385342  | 4  | 306 |
| RPL4P5     | chr9  | 7477045   | 7478320   | 0.615307968 | 0.69565618  | -0.080348212 | 2  | 307 |
| SSMEM1     | chr7  | 129847700 | 129856683 | 0.735856773 | 0.684907626 | 0.050949147  | 3  | 308 |
| NA         | chr12 | 54148142  | 54155888  | 0.435313885 | 0.50490399  | -0.069590105 | 2  | 309 |
| HAUS6P1    | chr7  | 53255081  | 53256631  | 0.460432783 | 0.544058012 | -0.083625229 | 2  | 310 |
| TTLL11-IT1 | chr9  | 124646915 | 124725998 | 0.739076871 | 0.835673957 | -0.096597086 | 3  | 311 |
| SLC9A7P1   | chr12 | 98847613  | 98850923  | 0.597310009 | 0.657081606 | -0.059771597 | 7  | 312 |
| IDO1       | chr8  | 39759794  | 39785963  | 0.47832874  | 0.55205555  | -0.073726809 | 3  | 313 |
| NA         | chr8  | 40227547  | 40259367  | 0.206712395 | 0.341104268 | -0.134391873 | 3  | 314 |
| CD200R1    | chr3  | 112640056 | 112693969 | 0.57503324  | 0.635405603 | -0.060372363 | 4  | 315 |
| NA         | chr1  | 27852316  | 27857072  | 0.385322269 | 0.334631746 | 0.050690523  | 8  | 316 |
| C20orf203  | chr20 | 31220661  | 31239680  | 0.909440068 | 0.790813619 | 0.118626449  | 1  | 317 |
| NA         | chr4  | 68926312  | 68929015  | 0.765400082 | 0.682972423 | 0.08242766   | 2  | 318 |
| NA         | chr8  | 38401170  | 38410198  | 0.274468222 | 0.33527994  | -0.060811719 | 1  | 319 |
| NA         | chr5  | 1963723   | 1967268   | 0.468492212 | 0.633709359 | -0.165217148 | 1  | 320 |
| NA         | chr8  | 134898739 | 134914650 | 0.693510503 | 0.564173721 | 0.129336782  | 1  | 321 |

|            |       |           |           |             |             |              |    |     |
|------------|-------|-----------|-----------|-------------|-------------|--------------|----|-----|
| RPTN       | chr1  | 152126071 | 152131704 | 0.570188352 | 0.671115534 | -0.100927182 | 3  | 322 |
| NA         | chrX  | 131234662 | 131261900 | 0.557680801 | 0.641153341 | -0.08347254  | 1  | 323 |
| OR52A5     | chr11 | 5152922   | 5153872   | 0.793693803 | 0.690734105 | 0.102959698  | 1  | 324 |
| NA         | chr5  | 17654482  | 17654752  | 0.745585269 | 0.648840192 | 0.096745077  | 1  | 325 |
| HIGD1AP5   | chr11 | 18128130  | 18128388  | 0.895983769 | 0.780060491 | 0.115923277  | 1  | 326 |
| SNORD18A   | chr15 | 66795581  | 66795652  | 0.222696228 | 0.275164907 | -0.052468679 | 1  | 327 |
| PRAMEF11   | chr1  | 12884468  | 12891264  | 0.503418719 | 0.588813548 | -0.08539483  | 3  | 328 |
| CDH9       | chr5  | 26880709  | 27121257  | 0.471668592 | 0.532811554 | -0.061142961 | 14 | 329 |
| MIR425     | chr3  | 49057581  | 49057667  | 0.739501801 | 0.849203519 | -0.109701718 | 1  | 330 |
| LPA        | chr6  | 160952515 | 161087407 | 0.492996339 | 0.424342827 | 0.068653512  | 4  | 331 |
| NA         | chr16 | 32896515  | 32900195  | 0.53318694  | 0.612637559 | -0.079450619 | 1  | 332 |
| FRMPD1     | chr9  | 37650997  | 37746901  | 0.438596034 | 0.488059488 | -0.049463454 | 6  | 333 |
| NA         | chr17 | 21908843  | 21909413  | 0.675578651 | 0.768242523 | -0.092663873 | 2  | 334 |
| MS4A12     | chr11 | 60260251  | 60274903  | 0.179947226 | 0.322585064 | -0.142637838 | 1  | 335 |
| NA         | chr12 | 77718421  | 77966055  | 0.343714924 | 0.398841939 | -0.055127015 | 12 | 336 |
| KRTAP19-2  | chr21 | 31859362  | 31859755  | 0.291578749 | 0.379785487 | -0.088206737 | 1  | 337 |
| NMS        | chr2  | 101086944 | 101099742 | 0.51282128  | 0.600441236 | -0.087619956 | 2  | 338 |
| TSPY11P    | chrY  | 6134634   | 6137316   | 0.208383156 | 0.257553544 | -0.049170388 | 1  | 339 |
| MIR1208    | chr8  | 129162362 | 129162434 | 0.592941651 | 0.680128386 | -0.087186735 | 1  | 340 |
| NA         | chr5  | 58335588  | 58359330  | 0.371640257 | 0.306305902 | 0.065334356  | 4  | 341 |
| VN1R5      | chr1  | 247419374 | 247420445 | 0.354813549 | 0.507161707 | -0.152348158 | 1  | 342 |
| SMCO1      | chr3  | 196233748 | 196242237 | 0.648911821 | 0.705711492 | -0.056799672 | 3  | 343 |
| OR13C4     | chr9  | 107288534 | 107289490 | 0.445526586 | 0.619164069 | -0.173637483 | 1  | 344 |
| NA         | chr7  | 127116937 | 127125858 | 0.442691479 | 0.547582185 | -0.104890706 | 1  | 345 |
| FBXO36-IT1 | chr2  | 230807444 | 230809853 | 0.624493678 | 0.715268054 | -0.090774376 | 1  | 346 |
| NA         | chr5  | 1004302   | 1004392   | 0.170473806 | 0.243655288 | -0.073181482 | 1  | 347 |
| ABCD1P3    | chr16 | 32486372  | 32489571  | 0.51562126  | 0.590629696 | -0.075008436 | 1  | 348 |
| S100A7A    | chr1  | 153389000 | 153395701 | 0.249663709 | 0.329440379 | -0.07977667  | 4  | 349 |
| MIR520F    | chr19 | 54185413  | 54185499  | 0.60236469  | 0.707418883 | -0.105054193 | 1  | 350 |
| SH2D1B     | chr1  | 162365056 | 162381928 | 0.588298656 | 0.662289944 | -0.073991288 | 3  | 351 |
| TMEM158    | chr3  | 45265958  | 45267770  | 0.161701286 | 0.276520805 | -0.114819519 | 2  | 352 |
| NA         | chr11 | 65265481  | 65265876  | 0.129027578 | 0.177001764 | -0.047974186 | 1  | 353 |
| PRAME      | chr22 | 22890123  | 22901768  | 0.533750785 | 0.618100398 | -0.084349614 | 8  | 354 |
| ABCF3      | chr3  | 183903811 | 183911800 | 0.337122297 | 0.385011619 | -0.047889322 | 6  | 355 |
| GP2        | chr16 | 20320894  | 20339130  | 0.3367388   | 0.384556448 | -0.047817648 | 4  | 356 |
| NA         | chr14 | 25064929  | 25126980  | 0.439968388 | 0.496079729 | -0.05611134  | 7  | 357 |
| NA         | chr1  | 30181698  | 30182394  | 0.905591671 | 0.792577798 | 0.113013873  | 1  | 358 |
| CTU2       | chr16 | 88772871  | 88781794  | 0.598135569 | 0.645634802 | -0.047499234 | 8  | 359 |
| NAV3       | chr12 | 78224685  | 78606790  | 0.472483323 | 0.536204313 | -0.06372099  | 14 | 360 |
| NA         | chr3  | 178244293 | 178578193 | 0.472339537 | 0.542008622 | -0.069669084 | 18 | 361 |
| NA         | chr6  | 161352112 | 161390803 | 0.705728113 | 0.753018163 | -0.04729005  | 4  | 362 |
| SNORD35B   | chr19 | 50000977  | 50001063  | 0.65630181  | 0.565033053 | 0.091268756  | 1  | 363 |
| NA         | chr21 | 23582258  | 23793139  | 0.527171129 | 0.461780929 | 0.065390201  | 1  | 364 |
| NA         | chr17 | 73679623  | 73680879  | 0.781160374 | 0.890787484 | -0.10962711  | 1  | 365 |
| NA         | chr1  | 68509013  | 68509916  | 0.66383475  | 0.757055477 | -0.093220727 | 1  | 366 |
| MAGEA2     | chrX  | 151918387 | 151922364 | 0.597574235 | 0.523757361 | 0.073816874  | 1  | 367 |
| DCAF8L2    | chrX  | 27608499  | 27766908  | 0.338095296 | 0.40195021  | -0.063854914 | 6  | 368 |
| OR4A5      | chr11 | 51411378  | 51412448  | 0.123270026 | 0.18379361  | -0.060523584 | 1  | 369 |
| FCRL3      | chr1  | 157644111 | 157670647 | 0.330709255 | 0.377672689 | -0.046963434 | 5  | 370 |
| NA         | chr12 | 130904080 | 130905564 | 0.367559684 | 0.417648858 | -0.050089174 | 2  | 371 |
| OR6Y1      | chr1  | 158516918 | 158517895 | 0.391994676 | 0.304039145 | 0.087955532  | 2  | 372 |
| CLLU1      | chr12 | 92815307  | 92824778  | 0.719025067 | 0.807681829 | -0.088656762 | 6  | 373 |
| C12orf50   | chr12 | 88373816  | 88427814  | 0.476954383 | 0.398335145 | 0.078619238  | 4  | 374 |
| FAM47A     | chrX  | 34147869  | 34150447  | 0.677625955 | 0.742607115 | -0.06498116  | 10 | 375 |
| RERGL      | chr12 | 18233803  | 18473041  | 0.72407417  | 0.815286161 | -0.091211991 | 7  | 376 |
| ACTL6B     | chr7  | 100240720 | 100254084 | 0.529516429 | 0.582866644 | -0.053350216 | 6  | 377 |
| KRTAP13-1  | chr21 | 31768392  | 31769136  | 0.223531846 | 0.285136406 | -0.06160456  | 1  | 378 |
| IDO2       | chr8  | 39792133  | 39873910  | 0.454416057 | 0.51433919  | -0.059923132 | 15 | 379 |
| SNORD37    | chr19 | 3982505   | 3982570   | 0.879981181 | 0.773053516 | 0.106927665  | 1  | 380 |
| NA         | chr2  | 103583866 | 103600887 | 0.307537034 | 0.354005285 | -0.046468251 | 1  | 381 |
| NA         | chr7  | 46009256  | 46019790  | 0.356941303 | 0.432673375 | -0.075732072 | 4  | 382 |
| SERPINB3   | chr18 | 61322431  | 61329197  | 0.57288825  | 0.684606742 | -0.111718492 | 2  | 383 |
| NA         | chr20 | 47657000  | 47662581  | 0.449949765 | 0.509742105 | -0.05979234  | 3  | 384 |
| NA         | chr8  | 38558144  | 38562373  | 0.712153809 | 0.625675354 | 0.086478454  | 1  | 385 |
| NA         | chr3  | 34244736  | 34310303  | 0.791893396 | 0.695868909 | 0.096024486  | 1  | 386 |



|              |       |           |           |             |             |              |    |     |
|--------------|-------|-----------|-----------|-------------|-------------|--------------|----|-----|
| LRR55        | chr11 | 56949221  | 56959191  | 0.577937543 | 0.632171275 | -0.054233732 | 5  | 387 |
| NA           | chr14 | 89816629  | 89831043  | 0.54365548  | 0.693259688 | -0.149604208 | 1  | 388 |
| SCG2         | chr2  | 224461658 | 224467221 | 0.293446724 | 0.350761348 | -0.057314624 | 5  | 389 |
| SSX6         | chrX  | 47967365  | 47980073  | 0.708776545 | 0.805925415 | -0.09714887  | 1  | 390 |
| BCMO1        | chr16 | 81272053  | 81324747  | 0.517319629 | 0.57423541  | -0.056915781 | 7  | 391 |
| NA           | chr1  | 190447681 | 190449865 | 0.427048731 | 0.375127102 | 0.051921629  | 1  | 392 |
| NA           | chr20 | 41818862  | 41830011  | 0.39509768  | 0.441197842 | -0.046100163 | 4  | 393 |
| NA           | chr14 | 29406095  | 29497969  | 0.47984595  | 0.545800165 | -0.065954215 | 1  | 394 |
| NA           | chr14 | 29445042  | 29448130  | 0.47984595  | 0.545800165 | -0.065954215 | 1  | 395 |
| MIR4724      | chr17 | 29861901  | 29861989  | 0.352491041 | 0.519825852 | -0.167334811 | 1  | 396 |
| DNAJB5       | chr9  | 34989638  | 34998897  | 0.84238854  | 0.741433059 | 0.100955481  | 1  | 397 |
| NA           | chr19 | 22715428  | 22716296  | 0.297959049 | 0.233414837 | 0.064544212  | 2  | 398 |
| NA           | chr5  | 21616371  | 21779631  | 0.413830109 | 0.470729218 | -0.056899109 | 1  | 399 |
| NA           | chr16 | 34213746  | 34213986  | 0.45607814  | 0.618650339 | -0.162572199 | 1  | 400 |
| GPR42        | chr19 | 35861831  | 35863855  | 0.638921488 | 0.725448658 | -0.086527169 | 1  | 401 |
| CSN2         | chr4  | 70820974  | 70826725  | 0.38570222  | 0.436323858 | -0.050621638 | 2  | 402 |
| PYDC2        | chr3  | 191178952 | 191179245 | 0.722972528 | 0.820646963 | -0.097674435 | 1  | 403 |
| PKMP3        | chr6  | 86369610  | 86370324  | 0.757422894 | 0.859635635 | -0.102212741 | 1  | 404 |
| NA           | chr18 | 15196998  | 15197774  | 0.188439287 | 0.252261017 | -0.06382173  | 1  | 405 |
| STX18-IT1    | chr4  | 4477848   | 4483427   | 0.738726511 | 0.824704287 | -0.085977777 | 2  | 406 |
| NA           | chr5  | 151329132 | 151650009 | 0.486964721 | 0.540686654 | -0.053721933 | 7  | 407 |
| NA           | chr1  | 83368866  | 83632498  | 0.705311312 | 0.579276558 | 0.126034754  | 2  | 408 |
| NA           | chrX  | 107965300 | 107975917 | 0.634958366 | 0.72023249  | -0.085274124 | 1  | 409 |
| LAYN         | chr11 | 111411005 | 111432264 | 0.586681888 | 0.631906081 | -0.045224193 | 15 | 410 |
| NA           | chr10 | 5237847   | 5237936   | 0.659467281 | 0.749883168 | -0.090415887 | 3  | 411 |
| NBPF22P      | chr5  | 85578278  | 85592281  | 0.437819753 | 0.496727094 | -0.058907341 | 1  | 412 |
| NA           | chr7  | 46300662  | 46334067  | 0.124902662 | 0.169956603 | -0.045053941 | 1  | 413 |
| DEFB126      | chr20 | 123010    | 126392    | 0.454398048 | 0.393148466 | 0.061249582  | 2  | 414 |
| NA           | chr4  | 178650792 | 178829090 | 0.618405226 | 0.69793766  | -0.079532434 | 3  | 415 |
| NA           | chr19 | 46732221  | 46733645  | 0.568946394 | 0.613868453 | -0.044922059 | 4  | 416 |
| OR1L3        | chr9  | 125437315 | 125438432 | 0.298414059 | 0.362415386 | -0.064001327 | 3  | 417 |
| PSG9         | chr19 | 43715943  | 43773682  | 0.400524181 | 0.450716622 | -0.050192441 | 2  | 418 |
| NA           | chr17 | 14198829  | 14200917  | 0.566509765 | 0.611254735 | -0.04474497  | 3  | 419 |
| KIR3DL2      | chr19 | 55361898  | 55378662  | 0.711487796 | 0.767861889 | -0.056374093 | 5  | 420 |
| NA           | chr11 | 13022637  | 13030706  | 0.632345108 | 0.709735499 | -0.077390391 | 10 | 421 |
| GPR112       | chrX  | 135383122 | 135519215 | 0.425510218 | 0.495628046 | -0.070117828 | 2  | 422 |
| GPAA1        | chr8  | 145137493 | 145141119 | 0.344677642 | 0.293242178 | 0.051435464  | 4  | 423 |
| OR7E37P      | chr13 | 42016906  | 42017786  | 0.726365435 | 0.642006245 | 0.084359189  | 1  | 424 |
| NA           | chr2  | 106575540 | 106578462 | 0.713465455 | 0.806993203 | -0.093527748 | 1  | 425 |
| PTGR1        | chr9  | 114312002 | 114362135 | 0.520547184 | 0.606669851 | -0.086122667 | 4  | 426 |
| NA           | chr3  | 112115494 | 112127981 | 0.731048839 | 0.646365947 | 0.084682892  | 1  | 427 |
| ALDH1L1-AS2  | chr3  | 125898908 | 125929012 | 0.517690001 | 0.573749368 | -0.056059367 | 21 | 428 |
| DEFB104A     | chr8  | 7693993   | 7698764   | 0.535418488 | 0.607709825 | -0.072291337 | 1  | 429 |
| NA           | chr9  | 109040673 | 109367076 | 0.816912318 | 0.72299303  | 0.093919288  | 1  | 430 |
| SPRR2E       | chr1  | 153065611 | 153078660 | 0.311703307 | 0.387054496 | -0.075351189 | 3  | 431 |
| SOX11        | chr2  | 5832799   | 5841516   | 0.397813886 | 0.441753559 | -0.043939673 | 21 | 432 |
| NA           | chr3  | 158519046 | 158519724 | 0.460873613 | 0.506727226 | -0.045853613 | 7  | 433 |
| NA           | chr2  | 43902292  | 43903461  | 0.670145335 | 0.563988595 | 0.10615674   | 1  | 434 |
| DIAPH2-AS1   | chrX  | 96686257  | 96897588  | 0.382844294 | 0.441810283 | -0.058965989 | 2  | 435 |
| OR4D5        | chr11 | 123810250 | 123811344 | 0.536221977 | 0.677359359 | -0.141137382 | 1  | 436 |
| CDH12        | chr5  | 21750782  | 22853731  | 0.359369704 | 0.406493792 | -0.047124088 | 15 | 437 |
| MAFB         | chr20 | 39314488  | 39317880  | 0.409298645 | 0.453556431 | -0.044257786 | 9  | 438 |
| MIR519C      | chr19 | 54189723  | 54189809  | 0.548027816 | 0.618466956 | -0.07043914  | 1  | 439 |
| RPL35        | chr9  | 127620159 | 127624260 | 0.295803311 | 0.355771493 | -0.059968181 | 3  | 440 |
| USP30-AS1    | chr12 | 109490155 | 109491757 | 0.067779972 | 0.111108049 | -0.043328076 | 7  | 441 |
| ARHGAP31-AS1 | chr3  | 119033140 | 119041607 | 0.41066884  | 0.453971879 | -0.043303039 | 5  | 442 |
| MPL          | chr1  | 43803478  | 43818443  | 0.574475135 | 0.622617573 | -0.048142438 | 11 | 443 |
| KRTAP5-3     | chr11 | 1628795   | 1629693   | 0.54779983  | 0.611560473 | -0.063760644 | 2  | 444 |
| NA           | chr11 | 49875632  | 49880954  | 0.266791103 | 0.370450251 | -0.103659148 | 1  | 445 |
| PTPRQ        | chr12 | 80799774  | 81074013  | 0.60914392  | 0.675877271 | -0.066733352 | 11 | 446 |
| NA           | chr1  | 55353236  | 55354523  | 0.329007576 | 0.392745666 | -0.063738091 | 2  | 447 |
| NA           | chr8  | 145634876 | 145635360 | 0.205218585 | 0.162057598 | 0.043160988  | 2  | 448 |
| NA           | chr1  | 18493423  | 18505840  | 0.71030774  | 0.788955242 | -0.078647503 | 2  | 449 |
| MC3R         | chr20 | 54823788  | 54824871  | 0.428849802 | 0.482317939 | -0.053468137 | 6  | 450 |
| NA           | chr8  | 144683416 | 144685394 | 0.861144783 | 0.764225653 | 0.09691913   | 1  | 451 |

|            |       |           |           |             |             |              |    |     |
|------------|-------|-----------|-----------|-------------|-------------|--------------|----|-----|
| SRPX2      | chrX  | 99899215  | 99926296  | 0.77024526  | 0.700778975 | 0.069466284  | 4  | 452 |
| NA         | chr5  | 139536904 | 139552636 | 0.70033075  | 0.635062616 | 0.065268134  | 3  | 453 |
| PVRL3-AS1  | chr3  | 110612555 | 110790400 | 0.495047606 | 0.544815936 | -0.04976833  | 8  | 454 |
| NA         | chr1  | 1252961   | 1254069   | 0.200712483 | 0.243491133 | -0.04277865  | 1  | 455 |
| NA         | chr17 | 77910551  | 77910992  | 0.547898496 | 0.486183114 | 0.061715382  | 1  | 456 |
| NA         | chr22 | 46449585  | 46453090  | 0.255671162 | 0.316702537 | -0.061031375 | 10 | 457 |
| POLR2K     | chr8  | 101162812 | 101166230 | 0.253295214 | 0.295977067 | -0.042681853 | 2  | 458 |
| ACSS3      | chr12 | 81331594  | 81650533  | 0.481426277 | 0.524104328 | -0.042678051 | 32 | 459 |
| CCL8       | chr17 | 32646055  | 32648421  | 0.759711522 | 0.835377091 | -0.075665569 | 2  | 460 |
| NA         | chr14 | 104162690 | 104163500 | 0.221609592 | 0.289830902 | -0.06822131  | 1  | 461 |
| NA         | chrX  | 103172005 | 103174131 | 0.333691731 | 0.396247878 | -0.062556147 | 3  | 462 |
| NA         | chr6  | 161293920 | 161339681 | 0.567680622 | 0.638924635 | -0.071244013 | 1  | 463 |
| NA         | chr6  | 161326802 | 161334670 | 0.567680622 | 0.638924635 | -0.071244013 | 1  | 464 |
| MIR516A1   | chr19 | 54259995  | 54260084  | 0.181847454 | 0.249920325 | -0.068072871 | 1  | 465 |
| NA         | chr11 | 7726835   | 7731064   | 0.384932659 | 0.444463803 | -0.059531143 | 4  | 466 |
| NF1P1      | chr15 | 21122015  | 21140987  | 0.370794718 | 0.442770126 | -0.071975408 | 3  | 467 |
| AKR1CL1    | chr10 | 5196335   | 5244449   | 0.59926826  | 0.671249473 | -0.071981213 | 9  | 468 |
| NA         | chr15 | 33595858  | 33602860  | 0.403311712 | 0.473388974 | -0.070077263 | 6  | 469 |
| NA         | chr2  | 234647598 | 234650603 | 0.801887597 | 0.901683636 | -0.099796038 | 1  | 470 |
| FAM120C    | chrX  | 54094757  | 54209714  | 0.510645419 | 0.569633988 | -0.058988569 | 7  | 471 |
| PLA2G2D    | chr1  | 20438432  | 20446050  | 0.692402835 | 0.780581077 | -0.088178242 | 3  | 472 |
| RBM8B      | chr14 | 60864475  | 60864999  | 0.786456049 | 0.649412935 | 0.137043114  | 1  | 473 |
| ZNF658     | chr9  | 40760700  | 40836415  | 0.273522024 | 0.35716955  | -0.083647526 | 3  | 474 |
| NA         | chr19 | 58175648  | 58176407  | 0.300326836 | 0.349726499 | -0.049399664 | 4  | 475 |
| CADM2-AS1  | chr3  | 86041333  | 86077157  | 0.450817708 | 0.505277435 | -0.054459726 | 2  | 476 |
| GPX3       | chr5  | 150400124 | 150408554 | 0.500529629 | 0.542306197 | -0.041776568 | 8  | 477 |
| LINC00899  | chr22 | 46436146  | 46440733  | 0.858042099 | 0.772358343 | 0.085683755  | 4  | 478 |
| NA         | chr4  | 14384747  | 14410702  | 0.672984146 | 0.756197816 | -0.08321367  | 1  | 479 |
| LINC00442  | chr13 | 19582399  | 19586699  | 0.6423449   | 0.705263958 | -0.062919058 | 2  | 480 |
| PPRC1      | chr10 | 103892787 | 103910082 | 0.279856653 | 0.321976813 | -0.04212016  | 7  | 481 |
| SUCLA2-AS1 | chr13 | 48575525  | 48576688  | 0.23194086  | 0.274499604 | -0.042558744 | 8  | 482 |
| SPIN4      | chrX  | 62567107  | 62571223  | 0.389882789 | 0.469304617 | -0.079421828 | 3  | 483 |
| PLA2G2A    | chr1  | 20301925  | 20306932  | 0.795686649 | 0.745911079 | 0.049775571  | 4  | 484 |
| PNPLA4     | chrX  | 7866288   | 7895780   | 0.444095975 | 0.378720719 | 0.065375256  | 13 | 485 |
| C4orf26    | chr4  | 76481258  | 76491095  | 0.780879738 | 0.845589221 | -0.064709483 | 3  | 486 |
| MIR206     | chr6  | 52009147  | 52009232  | 0.383301845 | 0.252851298 | 0.130450548  | 1  | 487 |
| TMCC3      | chr12 | 94960900  | 95044338  | 0.573808221 | 0.61624776  | -0.042439539 | 18 | 488 |
| NPPB       | chr1  | 11917521  | 11918988  | 0.496025856 | 0.537088857 | -0.041063    | 4  | 489 |
| PRSS58     | chr7  | 141951963 | 141957878 | 0.743673689 | 0.82881581  | -0.085142121 | 2  | 490 |
| NA         | chr2  | 5836352   | 5848227   | 0.556121651 | 0.598055398 | -0.041933748 | 15 | 491 |
| CLCA2      | chr1  | 86889769  | 86922241  | 0.759137866 | 0.682834258 | 0.076303608  | 3  | 492 |
| BBC3       | chr19 | 47724081  | 47736023  | 0.338474002 | 0.379360668 | -0.040886666 | 18 | 493 |
| NA         | chr20 | 31802726  | 31804873  | 0.617484998 | 0.545399167 | 0.072085831  | 2  | 494 |
| GOLGA6L1   | chr15 | 22736246  | 22746002  | 0.618642966 | 0.693087781 | -0.074444815 | 1  | 495 |
| ENDOG      | chr9  | 131580753 | 131584956 | 0.597341651 | 0.64928922  | -0.051947568 | 3  | 496 |
| KCNA4      | chr11 | 30031288  | 30038570  | 0.463660098 | 0.504455634 | -0.040795536 | 11 | 497 |
| NA         | chr17 | 42015731  | 42016327  | 0.657316074 | 0.59906907  | 0.058247005  | 2  | 498 |
| NA         | chr1  | 74807263  | 74844486  | 0.165818377 | 0.27184111  | -0.106022732 | 1  | 499 |
| NA         | chr1  | 94713464  | 94715048  | 0.247929238 | 0.158175324 | 0.089753913  | 1  | 500 |
| NA         | chr12 | 102329994 | 102330452 | 0.764679522 | 0.683028064 | 0.081651457  | 1  | 501 |
| NA         | chr22 | 48027423  | 48251349  | 0.696213836 | 0.759579919 | -0.063366083 | 7  | 502 |
| TRPV5      | chr7  | 142605267 | 142630905 | 0.728818337 | 0.795173485 | -0.066355147 | 2  | 503 |
| KMO        | chr1  | 241695434 | 241758944 | 0.634481975 | 0.694060136 | -0.059578162 | 4  | 504 |
| NSDHL      | chrX  | 151999511 | 152038273 | 0.566647391 | 0.607303606 | -0.040656215 | 11 | 505 |
| NA         | chr22 | 20194100  | 20194706  | 0.535038101 | 0.599182809 | -0.064144708 | 1  | 506 |
| C10orf67   | chr10 | 23556124  | 23633774  | 0.294876867 | 0.341075747 | -0.04619888  | 9  | 507 |
| NA         | chr10 | 32636325  | 32663416  | 0.299291156 | 0.339918786 | -0.040627629 | 6  | 508 |
| OCRL       | chrX  | 128673826 | 128726538 | 0.521287192 | 0.56420218  | -0.042914988 | 13 | 509 |
| NA         | chr3  | 182501024 | 182511182 | 0.391671012 | 0.336466705 | 0.055204307  | 7  | 510 |
| SLC18A1    | chr8  | 20002366  | 20040717  | 0.601676049 | 0.642285831 | -0.040609782 | 8  | 511 |
| NA         | chr2  | 223182994 | 223217708 | 0.329875969 | 0.370346888 | -0.040470919 | 9  | 512 |
| DNM1P50    | chr15 | 30860025  | 30863292  | 0.398751655 | 0.532782057 | -0.134030402 | 1  | 513 |
| OR4D6      | chr11 | 59224411  | 59225464  | 0.806687314 | 0.902159457 | -0.095472143 | 1  | 514 |
| VAMP8      | chr2  | 85788685  | 85809154  | 0.407185008 | 0.447597337 | -0.040412329 | 16 | 515 |
| RHO        | chr3  | 129247483 | 129254012 | 0.815169911 | 0.85844933  | -0.04327942  | 5  | 516 |

|             |       |           |           |             |             |              |    |     |
|-------------|-------|-----------|-----------|-------------|-------------|--------------|----|-----|
| NA          | chr7  | 62809532  | 62810437  | 0.721648188 | 0.645275145 | 0.076373043  | 1  | 517 |
| KRTAP1-3    | chr17 | 39190142  | 39191107  | 0.783952173 | 0.88561266  | -0.101660487 | 1  | 518 |
| BIRC8       | chr19 | 53792856  | 53794875  | 0.709394549 | 0.662484995 | 0.046909554  | 5  | 519 |
| SLAMF9      | chr1  | 159921282 | 159924044 | 0.733581559 | 0.693243857 | 0.040337702  | 4  | 520 |
| NA          | chr8  | 2350992   | 2369693   | 0.666912139 | 0.554421923 | 0.112490216  | 3  | 521 |
| NA          | chr1  | 6843952   | 6844903   | 0.129157865 | 0.179278603 | -0.050120738 | 4  | 522 |
| ZNF597      | chr16 | 3486104   | 3493542   | 0.611742957 | 0.665626381 | -0.053883424 | 8  | 523 |
| NA          | chr8  | 38409766  | 38416538  | 0.661903026 | 0.716574226 | -0.0546712   | 4  | 524 |
| SSX5        | chrX  | 48045656  | 48056199  | 0.742755509 | 0.680733056 | 0.062022453  | 3  | 525 |
| DSG3        | chr18 | 29027758  | 29058665  | 0.7402548   | 0.66266242  | 0.07759238   | 1  | 526 |
| NA          | chr16 | 73265954  | 73267869  | 0.531481263 | 0.634193148 | -0.102711884 | 5  | 527 |
| ZNF675      | chr19 | 23708433  | 23870022  | 0.185642227 | 0.225760244 | -0.040118017 | 2  | 528 |
| NA          | chr9  | 69146939  | 69149621  | 0.627795827 | 0.687608076 | -0.05981225  | 3  | 529 |
| NA          | chr6  | 149882288 | 149885085 | 0.689687999 | 0.617521752 | 0.072166247  | 1  | 530 |
| MIR3678     | chr17 | 73402150  | 73402243  | 0.181013651 | 0.303421423 | -0.122407772 | 1  | 531 |
| ENOPH1      | chr4  | 83351715  | 83382244  | 0.353222873 | 0.406310955 | -0.053088082 | 8  | 532 |
| ANKRD20A12P | chr1  | 142697653 | 142729971 | 0.536824544 | 0.600756471 | -0.063931926 | 1  | 533 |
| GPR183      | chr13 | 99946784  | 99959659  | 0.659712158 | 0.699612663 | -0.039900504 | 3  | 534 |
| OR56A4      | chr11 | 6023216   | 6024424   | 0.15052527  | 0.190424455 | -0.039899185 | 1  | 535 |
| NA          | chr14 | 54066550  | 54080744  | 0.437841805 | 0.540479497 | -0.102637692 | 1  | 536 |
| NA          | chr15 | 38276967  | 38354541  | 0.936589373 | 0.839421651 | 0.097167722  | 1  | 537 |
| NA          | chr5  | 17379015  | 17387419  | 0.529544679 | 0.591244675 | -0.061699996 | 1  | 538 |
| STRADBP1    | chr7  | 150209647 | 150210927 | 0.618522646 | 0.699097284 | -0.080574638 | 2  | 539 |
| NA          | chr10 | 120001076 | 120027222 | 0.518782838 | 0.55864586  | -0.039863023 | 6  | 540 |
| HCRTR2      | chr6  | 55039050  | 55147418  | 0.466560341 | 0.508260183 | -0.041699842 | 10 | 541 |
| CEACAM3     | chr19 | 42300369  | 42315591  | 0.673046791 | 0.76523615  | -0.092189359 | 2  | 542 |
| OR4F5       | chr1  | 69091     | 70008     | 0.631094079 | 0.704142746 | -0.073048667 | 1  | 543 |
| UQCR10      | chr22 | 30163358  | 30166402  | 0.364165107 | 0.403891087 | -0.03972598  | 3  | 544 |
| NA          | chr12 | 92815307  | 92877456  | 0.704278977 | 0.77664975  | -0.072370773 | 8  | 545 |
| KIF4A       | chrX  | 69509879  | 69640682  | 0.425801434 | 0.470218293 | -0.044416859 | 5  | 546 |
| PLSCR5      | chr3  | 146294342 | 146324003 | 0.420171082 | 0.470258695 | -0.050087613 | 2  | 547 |
| PRR21       | chr2  | 240981230 | 240982399 | 0.734227229 | 0.818692471 | -0.084465242 | 1  | 548 |
| ZNF619      | chr3  | 40518604  | 40531727  | 0.467897022 | 0.508572727 | -0.040675705 | 8  | 549 |
| TMEM202     | chr15 | 72690614  | 72700370  | 0.709623323 | 0.755521608 | -0.045898284 | 3  | 550 |
| TMEM248     | chr7  | 66386212  | 66423538  | 0.380856669 | 0.445444953 | -0.064588284 | 8  | 551 |
| NA          | chr19 | 55236001  | 55309738  | 0.51419251  | 0.554149608 | -0.039957099 | 18 | 552 |
| CD99L2      | chrX  | 149934810 | 150067289 | 0.37674444  | 0.416229122 | -0.039484683 | 9  | 553 |
| PSG7        | chr19 | 43428286  | 43441330  | 0.40934747  | 0.456809424 | -0.047461953 | 1  | 554 |
| OR2AJ1      | chr1  | 248097071 | 248098057 | 0.68689128  | 0.638453711 | 0.048437569  | 2  | 555 |
| NA          | chr3  | 170458140 | 170459154 | 0.726156479 | 0.620364739 | 0.105791739  | 1  | 556 |
| PTH2        | chr19 | 49925671  | 49926698  | 0.366912842 | 0.406296446 | -0.039383604 | 6  | 557 |
| F2RL2       | chr5  | 75911307  | 75919259  | 0.616232726 | 0.662707233 | -0.046474507 | 4  | 558 |
| MIR519B     | chr19 | 54198467  | 54198547  | 0.537895771 | 0.599437828 | -0.061542057 | 1  | 559 |
| RNASE6      | chr14 | 21249210  | 21250626  | 0.645825714 | 0.710266452 | -0.064440738 | 3  | 560 |
| OR2W5       | chr1  | 247654370 | 247655710 | 0.781080476 | 0.929005385 | -0.147924909 | 1  | 561 |
| MIR522      | chr19 | 54254465  | 54254551  | 0.483317937 | 0.629341688 | -0.146023751 | 1  | 562 |
| NA          | chr3  | 186435038 | 186477057 | 0.757162612 | 0.70790065  | 0.049261962  | 5  | 563 |
| AKR1C2      | chr10 | 5029967   | 5060223   | 0.609334265 | 0.67391628  | -0.064582015 | 5  | 564 |
| MAGEC1      | chrX  | 140991680 | 140997174 | 0.424878869 | 0.464467691 | -0.039588822 | 4  | 565 |
| HOTAIRM1    | chr7  | 27135266  | 27139884  | 0.202848528 | 0.249941923 | -0.047093395 | 18 | 566 |
| NA          | chr17 | 53628292  | 53629010  | 0.629945339 | 0.70132531  | -0.071379971 | 1  | 567 |
| IGHEP2      | chr9  | 5113549   | 5114804   | 0.892567681 | 0.80202891  | 0.090538772  | 1  | 568 |
| ECM2        | chr9  | 95256365  | 95298937  | 0.568164078 | 0.626150277 | -0.057986199 | 4  | 569 |
| OR10G7      | chr11 | 123908773 | 123909717 | 0.39512658  | 0.513105142 | -0.117978562 | 1  | 570 |
| DCAF16      | chr4  | 17802278  | 17812381  | 0.258789028 | 0.297627886 | -0.038838857 | 7  | 571 |
| NA          | chr4  | 119990479 | 119991452 | 0.301202239 | 0.387175583 | -0.085973344 | 1  | 572 |
| ALOX12P2    | chr17 | 6756895   | 6857426   | 0.870896154 | 0.802031483 | 0.068864671  | 15 | 573 |
| SEPHS1      | chr10 | 13359424  | 13390297  | 0.587632768 | 0.635129699 | -0.047496931 | 12 | 574 |
| NA          | chr7  | 62517831  | 62520462  | 0.112176062 | 0.17358215  | -0.061406088 | 1  | 575 |
| ACKR4       | chr3  | 132316081 | 132337811 | 0.67026073  | 0.779432789 | -0.109172059 | 2  | 576 |
| NA          | chr17 | 4469047   | 4475055   | 0.741734391 | 0.852450493 | -0.110716102 | 2  | 577 |
| NA          | chr2  | 231773567 | 231774817 | 0.934625237 | 0.840696919 | 0.093928318  | 1  | 578 |
| ERP27       | chr12 | 15066969  | 15092016  | 0.720815417 | 0.770940125 | -0.050124708 | 6  | 579 |
| RGS18       | chr1  | 192127587 | 192154945 | 0.404857111 | 0.453350911 | -0.0484938   | 2  | 580 |
| SDR16C5     | chr8  | 57212569  | 57233335  | 0.670701232 | 0.718599869 | -0.047898637 | 10 | 581 |

|            |       |           |           |             |             |              |    |     |
|------------|-------|-----------|-----------|-------------|-------------|--------------|----|-----|
| LETM1P2    | chr19 | 58555960  | 58558137  | 0.822288864 | 0.751171136 | 0.071117728  | 4  | 582 |
| NA         | chr5  | 180211782 | 180214869 | 0.85103517  | 0.76594208  | 0.08509309   | 1  | 583 |
| ADNP2      | chr18 | 77866915  | 77905406  | 0.623936026 | 0.688201946 | -0.06426592  | 9  | 584 |
| NA         | chr7  | 19958604  | 20180076  | 0.689518263 | 0.740316835 | -0.050798572 | 10 | 585 |
| NA         | chr12 | 126675924 | 126709860 | 0.517048048 | 0.566377322 | -0.049329274 | 7  | 586 |
| ACSL4      | chrX  | 108872579 | 108976632 | 0.417871514 | 0.478377003 | -0.060505489 | 5  | 587 |
| NA         | chr8  | 37278859  | 37411701  | 0.53882824  | 0.585176433 | -0.046348194 | 15 | 588 |
| NA         | chr2  | 168671284 | 168797654 | 0.684336916 | 0.777165343 | -0.092828427 | 10 | 589 |
| NA         | chr22 | 37621304  | 37622035  | 0.701047313 | 0.778497222 | -0.07744991  | 1  | 590 |
| NA         | chr20 | 44521333  | 44522058  | 0.899015196 | 0.809728713 | 0.089286483  | 1  | 591 |
| LINC00841  | chr10 | 44434451  | 44439914  | 0.830760509 | 0.748204251 | 0.082556258  | 1  | 592 |
| PFKFB1     | chrX  | 54959394  | 55024967  | 0.595044008 | 0.652532445 | -0.057488436 | 11 | 593 |
| NA         | chr22 | 37099963  | 37117517  | 0.626231967 | 0.696817762 | -0.070585795 | 1  | 594 |
| NA         | chr3  | 72553957  | 72599703  | 0.488874256 | 0.536320715 | -0.047446459 | 2  | 595 |
| NA         | chr7  | 56943078  | 56949839  | 0.456844896 | 0.507382697 | -0.050537801 | 1  | 596 |
| HIST1H2AI  | chr6  | 27775899  | 27776429  | 0.290981254 | 0.329098503 | -0.03811725  | 4  | 597 |
| KRTAP12-2  | chr21 | 46086106  | 46086844  | 0.576696874 | 0.519428825 | 0.057268049  | 1  | 598 |
| MT1JP      | chr16 | 56669651  | 56670998  | 0.850590861 | 0.768394763 | 0.082196098  | 3  | 599 |
| MIR196A2   | chr12 | 54385522  | 54385631  | 0.392542562 | 0.469538254 | -0.076995692 | 2  | 600 |
| CLUU1OS    | chr12 | 92813870  | 92821924  | 0.745108206 | 0.821366553 | -0.076258347 | 7  | 601 |
| CCL2       | chr17 | 32582304  | 32584222  | 0.585987959 | 0.652835814 | -0.066847855 | 3  | 602 |
| NA         | chr10 | 38453576  | 38466958  | 0.147533248 | 0.260966522 | -0.113433274 | 1  | 603 |
| GABRG3     | chr15 | 27216429  | 27778373  | 0.581660986 | 0.645493315 | -0.063832329 | 31 | 604 |
| DUSP9      | chrX  | 152907946 | 152916781 | 0.567547444 | 0.613905518 | -0.046358074 | 19 | 605 |
| SIRPD      | chr20 | 1514897   | 1539489   | 0.572121888 | 0.609997209 | -0.037875321 | 5  | 606 |
| PRAMEF6    | chr1  | 12998181  | 13117751  | 0.520209575 | 0.579466221 | -0.059256645 | 4  | 607 |
| NA         | chr5  | 132152940 | 132153692 | 0.759325475 | 0.841942482 | -0.082617007 | 1  | 608 |
| INSL4      | chr9  | 5231419   | 5235304   | 0.812336778 | 0.738333437 | 0.074003341  | 2  | 609 |
| OR2W3      | chr1  | 248031277 | 248060449 | 0.751414371 | 0.684527795 | 0.066886576  | 4  | 610 |
| NOVA1-AS1  | chr14 | 27067618  | 27275673  | 0.337835345 | 0.405816181 | -0.067980836 | 9  | 611 |
| DUSP26     | chr8  | 33448856  | 33457624  | 0.627180164 | 0.674729867 | -0.047549703 | 11 | 612 |
| NA         | chr22 | 29909878  | 29931379  | 0.743918959 | 0.824539685 | -0.080620725 | 1  | 613 |
| OR4S2      | chr11 | 55418380  | 55419315  | 0.295539077 | 0.392350061 | -0.096810984 | 1  | 614 |
| NA         | chr10 | 54210634  | 54230293  | 0.511281267 | 0.580363555 | -0.069082288 | 4  | 615 |
| MPP1       | chrX  | 154006959 | 154049282 | 0.488847896 | 0.534372433 | -0.045524537 | 15 | 616 |
| FATE1      | chrX  | 150884507 | 150891666 | 0.325457529 | 0.36283683  | -0.037379301 | 3  | 617 |
| NA         | chr6  | 47444979  | 47445308  | 0.359409928 | 0.432140887 | -0.072730959 | 2  | 618 |
| POTEA      | chr8  | 43147626  | 43218661  | 0.637624206 | 0.696431379 | -0.058807173 | 3  | 619 |
| SUB1P2     | chr14 | 74772128  | 74772766  | 0.620222406 | 0.686863421 | -0.066641016 | 1  | 620 |
| OR5H2      | chr3  | 98001732  | 98002676  | 0.266859535 | 0.384096761 | -0.117237226 | 1  | 621 |
| RPS6KA6    | chrX  | 83318984  | 83442933  | 0.449149306 | 0.488735114 | -0.039585808 | 3  | 622 |
| OR4K13     | chr14 | 20502003  | 20502919  | 0.789506427 | 0.873544859 | -0.084038432 | 1  | 623 |
| OR52I2     | chr11 | 4608021   | 4609135   | 0.592624723 | 0.655808255 | -0.063183533 | 1  | 624 |
| GRM1       | chr6  | 146348782 | 146758734 | 0.498048822 | 0.554274663 | -0.056225841 | 27 | 625 |
| OR52K2     | chr11 | 4470525   | 4471591   | 0.671289002 | 0.742681764 | -0.071392762 | 1  | 626 |
| NA         | chr3  | 32634464  | 32634804  | 0.610524498 | 0.675473378 | -0.06494888  | 1  | 627 |
| CYP7A1     | chr8  | 59402737  | 59412795  | 0.619134352 | 0.52864613  | 0.090488222  | 1  | 628 |
| NA         | chr12 | 128884523 | 128889359 | 0.091461375 | 0.144653655 | -0.053192281 | 1  | 629 |
| NA         | chr7  | 62787052  | 62814704  | 0.639080846 | 0.553230797 | 0.085850049  | 3  | 630 |
| NA         | chr7  | 62809239  | 62812151  | 0.639080846 | 0.553230797 | 0.085850049  | 3  | 631 |
| BBS10      | chr12 | 76738254  | 76742222  | 0.27946302  | 0.189214732 | 0.090248288  | 6  | 632 |
| TIPARP-AS1 | chr3  | 156389651 | 156392167 | 0.280377561 | 0.349495248 | -0.069117687 | 3  | 633 |
| SOWAHC     | chr2  | 110371911 | 110376563 | 0.517416082 | 0.557751073 | -0.040334991 | 6  | 634 |
| MAGI2-AS1  | chr7  | 78569166  | 78570211  | 0.731918469 | 0.661978186 | 0.069940283  | 1  | 635 |
| AKR1C4     | chr10 | 5237425   | 5260912   | 0.474413919 | 0.544872443 | -0.070458523 | 6  | 636 |
| NLRP8      | chr19 | 56459198  | 56499995  | 0.359678319 | 0.408072477 | -0.048394157 | 3  | 637 |
| NA         | chr7  | 130121332 | 130124233 | 0.828852712 | 0.749830837 | 0.079021875  | 1  | 638 |
| SNORA10    | chr16 | 2012335   | 2012467   | 0.460292972 | 0.562231006 | -0.101938034 | 2  | 639 |
| TUBB8P9    | chr1  | 227693883 | 227695993 | 0.477809657 | 0.542452902 | -0.064643246 | 1  | 640 |
| PSG10P     | chr19 | 43343520  | 43359870  | 0.32351412  | 0.361838744 | -0.038324624 | 1  | 641 |
| THAP11     | chr16 | 67876213  | 67878097  | 0.124357531 | 0.087971783 | 0.036385748  | 7  | 642 |
| NA         | chr21 | 43290742  | 43292163  | 0.662557644 | 0.587898398 | 0.074659247  | 1  | 643 |
| OR5P3      | chr11 | 7846584   | 7847519   | 0.779777421 | 0.861366626 | -0.081589204 | 1  | 644 |
| NA         | chr14 | 56981049  | 57018027  | 0.930585466 | 0.842534014 | 0.088051452  | 1  | 645 |
| MIR1468    | chrX  | 63005882  | 63005967  | 0.492812135 | 0.545379462 | -0.052567327 | 1  | 646 |

|            |       |           |           |             |             |              |     |     |
|------------|-------|-----------|-----------|-------------|-------------|--------------|-----|-----|
| ACOT2      | chr14 | 74034324  | 74042357  | 0.363183038 | 0.410779018 | -0.04759598  | 10  | 647 |
| NA         | chr7  | 47009300  | 47067079  | 0.824381717 | 0.910475769 | -0.086094051 | 1   | 648 |
| UGT3A1     | chr5  | 35951112  | 36001130  | 0.521180781 | 0.55735816  | -0.036177378 | 9   | 649 |
| RHOT1P2    | chr21 | 15309314  | 15309646  | 0.651137259 | 0.589422372 | 0.061714887  | 1   | 650 |
| SEMG1      | chr20 | 43835638  | 43838413  | 0.403546055 | 0.439680378 | -0.036134323 | 3   | 651 |
| NA         | chr12 | 15933002  | 15935054  | 0.29994718  | 0.375966334 | -0.076019154 | 1   | 652 |
| KRTAP20-2  | chr21 | 32007555  | 32007938  | 0.235916202 | 0.289445211 | -0.053529009 | 1   | 653 |
| NA         | chr4  | 16402053  | 16513810  | 0.640992092 | 0.714845611 | -0.07385352  | 4   | 654 |
| CRABP2     | chr1  | 156669398 | 156675608 | 0.356154978 | 0.392227979 | -0.036073    | 11  | 655 |
| NA         | chr6  | 14394557  | 14404520  | 0.533134577 | 0.729441045 | -0.196306468 | 1   | 656 |
| NA         | chr16 | 20451588  | 20458322  | 0.255166623 | 0.358987321 | -0.103820699 | 1   | 657 |
| NA         | chr1  | 9732484   | 9747613   | 0.395238008 | 0.479487922 | -0.084249915 | 1   | 658 |
| CYP2C8     | chr10 | 96796530  | 96829254  | 0.940078332 | 0.851944284 | 0.088134048  | 1   | 659 |
| OR2Z1      | chr19 | 8841316   | 8842371   | 0.422322881 | 0.288112126 | 0.134210754  | 1   | 660 |
| C6orf223   | chr6  | 43968317  | 43973695  | 0.395805289 | 0.446678675 | -0.050873386 | 7   | 661 |
| NA         | chr10 | 59866184  | 59866640  | 0.669200578 | 0.726686178 | -0.0574856   | 2   | 662 |
| LINC00158  | chr21 | 26758133  | 26804013  | 0.210668283 | 0.28351808  | -0.072849797 | 1   | 663 |
| BATF2      | chr11 | 64755415  | 64764517  | 0.67223457  | 0.586563532 | 0.085671038  | 4   | 664 |
| NA         | chr4  | 55702327  | 55711568  | 0.924203203 | 0.837725976 | 0.086477226  | 1   | 665 |
| NA         | chr8  | 48100928  | 48101183  | 0.433236344 | 0.333617177 | 0.099619167  | 1   | 666 |
| NA         | chr5  | 54317127  | 54330098  | 0.80044213  | 0.744308788 | 0.056133342  | 4   | 667 |
| IGJ        | chr4  | 71521258  | 71547534  | 0.782495126 | 0.710025093 | 0.072470034  | 2   | 668 |
| NA         | chr3  | 26660821  | 26664181  | 0.556971871 | 0.497271858 | 0.059700012  | 8   | 669 |
| MAOA       | chrX  | 43515467  | 43606068  | 0.487754368 | 0.412964744 | 0.074789623  | 4   | 670 |
| LINC00968  | chr8  | 57408805  | 57472382  | 0.517289513 | 0.570783773 | -0.05349426  | 1   | 671 |
| SNORD3D    | chr17 | 19015313  | 19015949  | 0.161783585 | 0.202076184 | -0.040292599 | 2   | 672 |
| NA         | chr1  | 248902716 | 248903150 | 0.841789942 | 0.923107442 | -0.081317501 | 2   | 673 |
| BEST3      | chr12 | 70037140  | 70093256  | 0.644380387 | 0.680011099 | -0.035630712 | 9   | 674 |
| LCE6A      | chr1  | 152815344 | 152816459 | 0.411053951 | 0.474081686 | -0.063027735 | 3   | 675 |
| PLXDC2     | chr10 | 20105168  | 20569286  | 0.363397148 | 0.434721673 | -0.071324525 | 28  | 676 |
| OR8K1      | chr11 | 56113421  | 56114507  | 0.312537547 | 0.397539368 | -0.085001822 | 2   | 677 |
| HSD17B4    | chr5  | 118788138 | 118972894 | 0.515158623 | 0.558464076 | -0.043305454 | 24  | 678 |
| NA         | chr7  | 73400322  | 73403097  | 0.928395972 | 0.842316626 | 0.086079346  | 1   | 679 |
| RLBP1      | chr15 | 89753100  | 89764982  | 0.832608221 | 0.875006318 | -0.042398097 | 5   | 680 |
| NA         | chr11 | 12052422  | 12083332  | 0.579381433 | 0.531487083 | 0.04789435   | 2   | 681 |
| NA         | chr14 | 106444607 | 106445233 | 0.700604187 | 0.770935907 | -0.07033172  | 5   | 682 |
| SERPINB11  | chr18 | 61314813  | 61391127  | 0.401960608 | 0.497303294 | -0.095342686 | 8   | 683 |
| NA         | chr5  | 179720245 | 179722253 | 0.481588038 | 0.569046295 | -0.087458257 | 1   | 684 |
| NA         | chr19 | 8646044   | 8647599   | 0.713923649 | 0.786773272 | -0.072849624 | 1   | 685 |
| SCARNA13   | chr14 | 95999692  | 95999966  | 0.172146583 | 0.20755082  | -0.035404237 | 1   | 686 |
| TBC1D21    | chr15 | 74165949  | 74181555  | 0.598676359 | 0.540536805 | 0.058139554  | 3   | 687 |
| NA         | chr10 | 65424424  | 65750328  | 0.601090293 | 0.650232495 | -0.049142202 | 24  | 688 |
| NA         | chr6  | 157097494 | 157098211 | 0.086790716 | 0.122063106 | -0.03527239  | 2   | 689 |
| TTPA       | chr8  | 63961112  | 63998612  | 0.203192707 | 0.284111348 | -0.08091864  | 5   | 690 |
| IL10RB-AS1 | chr21 | 34636178  | 34638565  | 0.73149031  | 0.696301369 | 0.03518894   | 5   | 691 |
| NA         | chr1  | 161110998 | 161111126 | 0.306371606 | 0.3414797   | -0.035108094 | 1   | 692 |
| RIMBP2     | chr12 | 130880682 | 131200826 | 0.599934036 | 0.641089782 | -0.041155746 | 206 | 693 |
| NA         | chrX  | 82766304  | 82767135  | 0.603978983 | 0.665228242 | -0.061249259 | 1   | 694 |
| MSC        | chr8  | 72753784  | 72756703  | 0.588412823 | 0.623487568 | -0.035074745 | 13  | 695 |
| HHLA1      | chr8  | 133073733 | 133123406 | 0.470902974 | 0.538711364 | -0.06780839  | 6   | 696 |
| SPATA12    | chr3  | 57094469  | 57109460  | 0.817378784 | 0.88234273  | -0.064963946 | 5   | 697 |
| FLNA       | chrX  | 153576892 | 153603006 | 0.553027053 | 0.593551512 | -0.040524459 | 21  | 698 |
| OR10A7     | chr12 | 55614809  | 55615759  | 0.453344732 | 0.617006849 | -0.163662117 | 1   | 699 |
| CPA3       | chr3  | 148583043 | 148614983 | 0.660021129 | 0.70766515  | -0.047644021 | 3   | 700 |
| NA         | chr16 | 67572460  | 67574009  | 0.674988722 | 0.758296051 | -0.083307329 | 2   | 701 |
| LINC00615  | chr12 | 91311800  | 91342446  | 0.781193465 | 0.85975942  | -0.078565955 | 1   | 702 |
| ALDH1L1    | chr3  | 125822412 | 125916837 | 0.604106758 | 0.646161451 | -0.042054692 | 32  | 703 |
| KRTAP1-5   | chr17 | 39182278  | 39183454  | 0.50685421  | 0.558149943 | -0.051295733 | 1   | 704 |
| LINC00941  | chr12 | 30947977  | 30955645  | 0.267873592 | 0.302725622 | -0.034852031 | 13  | 705 |
| USP27X     | chrX  | 49644470  | 49647166  | 0.377423528 | 0.415201876 | -0.037778348 | 4   | 706 |
| NA         | chr5  | 153281019 | 153282783 | 0.829256671 | 0.753931185 | 0.075325487  | 1   | 707 |
| NA         | chr7  | 69060944  | 69062434  | 0.385624799 | 0.461101327 | -0.075476528 | 1   | 708 |
| NA         | chr11 | 48366900  | 48373999  | 0.331944482 | 0.375917976 | -0.043973494 | 1   | 709 |
| MID1       | chrX  | 10413350  | 10851773  | 0.428918375 | 0.469594112 | -0.040675738 | 21  | 710 |
| OR5AK2     | chr11 | 56756347  | 56757342  | 0.234688985 | 0.320201414 | -0.085512428 | 1   | 711 |

|             |       |           |           |             |             |              |    |     |
|-------------|-------|-----------|-----------|-------------|-------------|--------------|----|-----|
| NA          | chr7  | 142573589 | 142590199 | 0.654174364 | 0.712041177 | -0.057866813 | 14 | 712 |
| OR4X2       | chr11 | 48266608  | 48267622  | 0.558089881 | 0.383374686 | 0.174715195  | 1  | 713 |
| MIR1306     | chr22 | 20073581  | 20073665  | 0.758924661 | 0.834618663 | -0.075694001 | 1  | 714 |
| NA          | chr2  | 10223908  | 10226228  | 0.536382709 | 0.44918363  | 0.087199079  | 1  | 715 |
| NA          | chr20 | 3868886   | 3869515   | 0.4615902   | 0.512115739 | -0.05052554  | 3  | 716 |
| NA          | chr18 | 29265618  | 29266786  | 0.55245982  | 0.649765993 | -0.097306174 | 2  | 717 |
| NA          | chr19 | 9904297   | 9912977   | 0.184990429 | 0.219508852 | -0.034518423 | 1  | 718 |
| NA          | chr1  | 185527511 | 185534763 | 0.817423665 | 0.898526921 | -0.081103256 | 1  | 719 |
| NA          | chr2  | 105979495 | 105995296 | 0.691635433 | 0.657125696 | 0.034509737  | 5  | 720 |
| NA          | chr2  | 146358475 | 146360991 | 0.385931029 | 0.455491436 | -0.069560407 | 1  | 721 |
| NA          | chr10 | 127407340 | 127407934 | 0.218964445 | 0.253465626 | -0.034501181 | 4  | 722 |
| C12orf68    | chr12 | 48577366  | 48579709  | 0.691910113 | 0.65741391  | 0.034496203  | 7  | 723 |
| NA          | chr5  | 26669820  | 26670098  | 0.512651829 | 0.563769018 | -0.05111719  | 1  | 724 |
| MIR517A     | chr19 | 54215522  | 54215608  | 0.36859812  | 0.419971917 | -0.051373796 | 1  | 725 |
| MORF4L2-AS1 | chrX  | 102942212 | 102946700 | 0.545449252 | 0.587135589 | -0.041686337 | 5  | 726 |
| ARRB2       | chr17 | 4613784   | 4624794   | 0.608569227 | 0.553584159 | 0.054985068  | 11 | 727 |
| C6orf164    | chr6  | 88106840  | 88109467  | 0.618121124 | 0.679469908 | -0.061348784 | 1  | 728 |
| NUP62CL     | chrX  | 106366657 | 106449670 | 0.599127082 | 0.633576508 | -0.034449426 | 7  | 729 |
| DEFB119     | chr20 | 29964967  | 29978406  | 0.274009297 | 0.35667852  | -0.082669223 | 3  | 730 |
| GRIA1       | chr5  | 152869175 | 153193429 | 0.221384687 | 0.278000031 | -0.056615344 | 12 | 731 |
| MS4A6A      | chr11 | 59939081  | 59952139  | 0.325667159 | 0.403920213 | -0.078253054 | 9  | 732 |
| FUNDC1      | chrX  | 44382885  | 44402247  | 0.070508551 | 0.104892225 | -0.034383675 | 2  | 733 |
| ARMCX6      | chrX  | 100870110 | 100872991 | 0.338133827 | 0.378697555 | -0.040563728 | 5  | 734 |
| OR2T33      | chr1  | 248436073 | 248437138 | 0.387786961 | 0.426518361 | -0.0387314   | 1  | 735 |
| NA          | chr2  | 129999746 | 130031421 | 0.579290588 | 0.658068276 | -0.078777688 | 2  | 736 |
| NANOS2      | chr19 | 46416475  | 46418036  | 0.855633341 | 0.8120662   | 0.043567141  | 6  | 737 |
| ATP6V1G1P2  | chr8  | 48105625  | 48105970  | 0.678198175 | 0.744982839 | -0.066784664 | 1  | 738 |
| NA          | chr6  | 134142285 | 134172938 | 0.482502025 | 0.535783352 | -0.053281327 | 9  | 739 |
| LGALS9B     | chr17 | 20352708  | 20370852  | 0.520307606 | 0.473404187 | 0.046903419  | 1  | 740 |
| NA          | chr4  | 62937470  | 63031272  | 0.509097992 | 0.559435201 | -0.050337209 | 1  | 741 |
| CRBN        | chr3  | 3190676   | 3221394   | 0.247502337 | 0.281669246 | -0.03416691  | 6  | 742 |
| NA          | chr16 | 18027046  | 18245452  | 0.178110035 | 0.246593164 | -0.068483129 | 5  | 743 |
| MPZL2       | chr11 | 118124118 | 118135251 | 0.239310163 | 0.273462693 | -0.03415253  | 10 | 744 |
| HYAL4       | chr7  | 123469037 | 123517532 | 0.677594363 | 0.711709204 | -0.034114841 | 8  | 745 |
| OR3A2       | chr17 | 3181193   | 3182268   | 0.305426255 | 0.375045042 | -0.069618787 | 2  | 746 |
| SEPW1       | chr19 | 48281829  | 48287943  | 0.431375889 | 0.46541712  | -0.034041231 | 8  | 747 |
| LDOC1       | chrX  | 140269934 | 140271310 | 0.505161461 | 0.541619608 | -0.036458147 | 4  | 748 |
| PEX6        | chr6  | 42931608  | 42946958  | 0.299675621 | 0.342481491 | -0.04280587  | 7  | 749 |
| NA          | chr14 | 45552248  | 45553180  | 0.448378302 | 0.493729625 | -0.045351323 | 4  | 750 |
| NA          | chr8  | 130691381 | 130695925 | 0.711506352 | 0.780918967 | -0.069412615 | 1  | 751 |
| NA          | chr11 | 1784239   | 1784979   | 0.705154931 | 0.773915995 | -0.068761064 | 1  | 752 |
| PSG8        | chr19 | 43256838  | 43359843  | 0.528874302 | 0.573758218 | -0.044883916 | 8  | 753 |
| MLLT11      | chr1  | 151030234 | 151040970 | 0.275362483 | 0.30929243  | -0.033929947 | 21 | 754 |
| NA          | chr1  | 205060291 | 205061074 | 0.785973622 | 0.862367877 | -0.076394255 | 1  | 755 |
| LINC00525   | chr7  | 47801074  | 47806370  | 0.427171501 | 0.296143754 | 0.131027747  | 1  | 756 |
| NA          | chr12 | 312808    | 314189    | 0.107689024 | 0.141540195 | -0.033851171 | 1  | 757 |
| SLC10A2     | chr13 | 103696350 | 103719196 | 0.198201215 | 0.291809454 | -0.093608239 | 3  | 758 |
| NA          | chr4  | 19457059  | 19911315  | 0.632905126 | 0.700735313 | -0.067830187 | 5  | 759 |
| ZBP1        | chr20 | 56178902  | 56195632  | 0.853588133 | 0.789845692 | 0.063742442  | 3  | 760 |
| FAM83C-AS1  | chr20 | 33873054  | 33873559  | 0.706983934 | 0.757903427 | -0.050919494 | 2  | 761 |
| NA          | chr12 | 48276432  | 48295308  | 0.800646299 | 0.870574793 | -0.069928494 | 3  | 762 |
| CCR2        | chr3  | 46395225  | 46402419  | 0.588662252 | 0.55184708  | 0.036815172  | 4  | 763 |
| AGAP2-AS1   | chr12 | 58120054  | 58122139  | 0.630028371 | 0.663726958 | -0.033698587 | 4  | 764 |
| NA          | chr6  | 73919469  | 73972919  | 0.632138561 | 0.665828451 | -0.03368989  | 15 | 765 |
| SNHG6       | chr8  | 67833919  | 67838633  | 0.435589795 | 0.492897944 | -0.057308148 | 10 | 766 |
| HTATSF1     | chrX  | 135579238 | 135594505 | 0.480153142 | 0.526423748 | -0.046270606 | 12 | 767 |
| NA          | chr9  | 119266562 | 119324572 | 0.2174557   | 0.285142776 | -0.067687075 | 1  | 768 |
| ZNF66       | chr19 | 20959110  | 20991922  | 0.268521463 | 0.23486394  | 0.033657524  | 1  | 769 |
| NA          | chr11 | 76511408  | 76515599  | 0.913765047 | 0.833513407 | 0.08025164   | 1  | 770 |
| KIR2DS4     | chr19 | 55344131  | 55360024  | 0.28266861  | 0.325790443 | -0.043121833 | 2  | 771 |
| DMD-AS2     | chrX  | 31279225  | 31341747  | 0.491897559 | 0.525323573 | -0.033426014 | 16 | 772 |
| NA          | chr19 | 22605315  | 22608847  | 0.418870473 | 0.49454372  | -0.075673248 | 2  | 773 |
| CYP4F24P    | chr19 | 15870144  | 15890797  | 0.298212506 | 0.331627604 | -0.033415097 | 6  | 774 |
| KRTAP12-4   | chr21 | 46074130  | 46074576  | 0.529963233 | 0.581149239 | -0.051186006 | 1  | 775 |
| LINC00395   | chr13 | 64241814  | 64312151  | 0.706135139 | 0.755673569 | -0.04953843  | 2  | 776 |

|             |       |           |           |             |             |              |    |     |
|-------------|-------|-----------|-----------|-------------|-------------|--------------|----|-----|
| NA          | chr5  | 43874469  | 43886730  | 0.855091666 | 0.780227504 | 0.074864162  | 1  | 777 |
| NBPF4       | chr1  | 108765087 | 108786689 | 0.637462883 | 0.581435774 | 0.056027109  | 1  | 778 |
| NA          | chr7  | 84161792  | 84213638  | 0.649760637 | 0.573834121 | 0.075926517  | 1  | 779 |
| CLEC7A      | chr12 | 10269376  | 10282857  | 0.745550291 | 0.819952469 | -0.074402177 | 3  | 780 |
| PCDHB11     | chr5  | 140579183 | 140582618 | 0.480882037 | 0.546745738 | -0.065863701 | 7  | 781 |
| NA          | chr19 | 33790840  | 33792074  | 0.563376935 | 0.617549601 | -0.054172666 | 1  | 782 |
| OR4F15      | chr15 | 102358366 | 102359350 | 0.828926124 | 0.908138132 | -0.079212007 | 1  | 783 |
| NA          | chr16 | 80099733  | 80201474  | 0.649851678 | 0.567068417 | 0.082783262  | 2  | 784 |
| AMELX       | chrX  | 11311533  | 11318881  | 0.533401013 | 0.390676011 | 0.142725002  | 1  | 785 |
| NA          | chr14 | 19562689  | 19566731  | 0.256632792 | 0.223500983 | 0.033131809  | 1  | 786 |
| NA          | chr11 | 69831982  | 69861921  | 0.802905025 | 0.726830481 | 0.076074544  | 5  | 787 |
| NA          | chr5  | 3417266   | 3536208   | 0.506744977 | 0.543244763 | -0.036499786 | 19 | 788 |
| NA          | chr19 | 49545431  | 49545988  | 0.504488324 | 0.564203788 | -0.059715464 | 2  | 789 |
| ADAL        | chr15 | 43622872  | 43646096  | 0.37566881  | 0.447868147 | -0.072199336 | 11 | 790 |
| SCML2P1     | chr18 | 6926943   | 6928209   | 0.830772298 | 0.909653654 | -0.078881356 | 1  | 791 |
| MYH4        | chr17 | 10346607  | 10372876  | 0.573235468 | 0.622921285 | -0.049685816 | 3  | 792 |
| FAM9A       | chrX  | 8758836   | 8769424   | 0.896829427 | 0.828038395 | 0.068791031  | 7  | 793 |
| TPTEP1      | chr22 | 17082777  | 17179521  | 0.59907224  | 0.64378102  | -0.044708779 | 19 | 794 |
| EFCAB6-AS1  | chr22 | 43912134  | 43932747  | 0.672118499 | 0.735683243 | -0.063564744 | 1  | 795 |
| LINC00928   | chr15 | 90048508  | 90067265  | 0.795394285 | 0.870400673 | -0.075006387 | 1  | 796 |
| OPN1MW      | chrX  | 153448107 | 153461633 | 0.640821123 | 0.701414415 | -0.060593292 | 1  | 797 |
| G6PD        | chrX  | 153759606 | 153775787 | 0.558072819 | 0.604789157 | -0.046716338 | 19 | 798 |
| NA          | chr2  | 124774435 | 124782750 | 0.653366733 | 0.695210561 | -0.041843828 | 6  | 799 |
| NA          | chr15 | 22278010  | 22413497  | 0.392681414 | 0.439235386 | -0.046553972 | 5  | 800 |
| NA          | chr1  | 67131547  | 67142710  | 0.863452388 | 0.789344729 | 0.074107659  | 1  | 801 |
| OR2T27      | chr1  | 248813232 | 248814185 | 0.459985374 | 0.515989605 | -0.056004231 | 2  | 802 |
| NA          | chr14 | 71165415  | 71178870  | 0.689850842 | 0.751542184 | -0.061691343 | 2  | 803 |
| NA          | chr22 | 39128914  | 39129588  | 0.591288982 | 0.647411674 | -0.056122692 | 1  | 804 |
| NA          | chr9  | 126772809 | 126773393 | 0.735923186 | 0.804978507 | -0.069055321 | 1  | 805 |
| TLL13       | chr15 | 90792762  | 90808199  | 0.402617232 | 0.369987512 | 0.03262972   | 4  | 806 |
| NA          | chr19 | 23386812  | 23387358  | 0.891520865 | 0.818099289 | 0.073421575  | 3  | 807 |
| FLG2        | chr1  | 152321211 | 152332482 | 0.761316735 | 0.831080578 | -0.069763843 | 3  | 808 |
| NA          | chr3  | 109128837 | 109214014 | 0.545364647 | 0.634626657 | -0.089262011 | 5  | 809 |
| AK3         | chr9  | 4711155   | 4742043   | 0.291155177 | 0.323629195 | -0.032474018 | 5  | 810 |
| NA          | chr5  | 44388834  | 44414091  | 0.185932063 | 0.153482433 | 0.032449631  | 10 | 811 |
| NA          | chr18 | 34853669  | 34856535  | 0.773276394 | 0.712698447 | 0.060577948  | 7  | 812 |
| F2RL1       | chr5  | 76114758  | 76131140  | 0.262953612 | 0.295292474 | -0.032338861 | 13 | 813 |
| APCDD1L-AS1 | chr20 | 57090435  | 57194944  | 0.827233137 | 0.756819102 | 0.070414035  | 2  | 814 |
| NA          | chr14 | 97925153  | 98047938  | 0.650624923 | 0.682919698 | -0.032294775 | 7  | 815 |
| NA          | chr15 | 59693420  | 59694203  | 0.613224809 | 0.670504381 | -0.057279572 | 1  | 816 |
| NA          | chr19 | 53771123  | 53774185  | 0.279227516 | 0.360741112 | -0.081513596 | 2  | 817 |
| SDC4P       | chr22 | 30877298  | 30877898  | 0.725687942 | 0.663786077 | 0.061901865  | 1  | 818 |
| NA          | chr19 | 22798359  | 22806773  | 0.565775562 | 0.598044717 | -0.032269155 | 10 | 819 |
| NA          | chr1  | 193273875 | 193335083 | 0.689621918 | 0.797023482 | -0.107401563 | 1  | 820 |
| NA          | chr19 | 14141667  | 14142369  | 0.772485953 | 0.831414374 | -0.058928421 | 4  | 821 |
| CXorf64     | chrX  | 125953747 | 125955769 | 0.181194454 | 0.244998839 | -0.063804384 | 2  | 822 |
| NA          | chr16 | 2506253   | 2509980   | 0.486573449 | 0.454407554 | 0.032165895  | 4  | 823 |
| NA          | chr9  | 33503653  | 33510709  | 0.364094962 | 0.400645066 | -0.036550104 | 1  | 824 |
| CT47B1      | chrX  | 120006457 | 120009779 | 0.634549951 | 0.685137809 | -0.050587858 | 5  | 825 |
| CALR4P      | chr1  | 52027538  | 52060569  | 0.775283746 | 0.829236572 | -0.053952826 | 5  | 826 |
| PTPRT       | chr20 | 40701392  | 41818610  | 0.354176518 | 0.38630149  | -0.032124972 | 9  | 827 |
| NA          | chr1  | 167789644 | 167790462 | 0.125850955 | 0.198171182 | -0.072320227 | 1  | 828 |
| ATP6AP1     | chrX  | 153656978 | 153664862 | 0.594936203 | 0.634344442 | -0.039408239 | 9  | 829 |
| CADM3       | chr1  | 159141399 | 159173103 | 0.307116372 | 0.341087709 | -0.033971338 | 15 | 830 |
| YIPF6       | chrX  | 67718165  | 67757127  | 0.527458633 | 0.571440759 | -0.043982126 | 13 | 831 |
| NA          | chr11 | 131532025 | 131533477 | 0.849571994 | 0.923287041 | -0.073715047 | 2  | 832 |
| MIR4710     | chr14 | 105144031 | 105144086 | 0.351035927 | 0.399263277 | -0.048227349 | 1  | 833 |
| MIR135A1    | chr3  | 52328235  | 52328324  | 0.892741924 | 0.817220807 | 0.075521118  | 1  | 834 |
| OLFM4       | chr13 | 53602894  | 53626192  | 0.846081958 | 0.92330961  | -0.077227652 | 4  | 835 |
| NA          | chr12 | 130554870 | 130557230 | 0.366420446 | 0.410934798 | -0.044514353 | 3  | 836 |
| CYSLTR2     | chr13 | 49280951  | 49283498  | 0.645010818 | 0.697153444 | -0.052142626 | 2  | 837 |
| ZNF208      | chr19 | 22115760  | 22193751  | 0.350199806 | 0.394017807 | -0.043818001 | 12 | 838 |
| LINC00659   | chr20 | 61405480  | 61406764  | 0.736536115 | 0.659456222 | 0.077079893  | 1  | 839 |
| KCNMB2      | chr3  | 177990720 | 178562217 | 0.481026652 | 0.535151031 | -0.054124379 | 21 | 840 |
| NA          | chr19 | 54357835  | 54372361  | 0.346981165 | 0.378917358 | -0.031936194 | 23 | 841 |

|           |       |           |           |             |             |              |    |     |
|-----------|-------|-----------|-----------|-------------|-------------|--------------|----|-----|
| CENPVP3   | chrX  | 51360961  | 51361446  | 0.672642071 | 0.615895896 | 0.056746175  | 1  | 842 |
| PATE4     | chr11 | 125703211 | 125709964 | 0.257767742 | 0.318746226 | -0.060978484 | 2  | 843 |
| SENP7     | chr3  | 101043049 | 101232085 | 0.364030979 | 0.415962083 | -0.051931105 | 8  | 844 |
| GLRA4     | chrX  | 102962152 | 102983583 | 0.689435834 | 0.736930829 | -0.047494995 | 6  | 845 |
| PGR       | chr11 | 100900355 | 101001255 | 0.401552712 | 0.433388527 | -0.031835815 | 17 | 846 |
| SGCG      | chr13 | 23755091  | 23899304  | 0.791826438 | 0.836779624 | -0.044953187 | 4  | 847 |
| SNORA70   | chrX  | 153628622 | 153628756 | 0.70797132  | 0.772860372 | -0.064889052 | 1  | 848 |
| NA        | chr12 | 54350318  | 54352745  | 0.613417619 | 0.545159223 | 0.068258395  | 1  | 849 |
| DGAT2L6   | chrX  | 69397333  | 69425395  | 0.613386783 | 0.672090117 | -0.058703334 | 3  | 850 |
| NA        | chr18 | 68696006  | 68700292  | 0.303904934 | 0.441228339 | -0.137323405 | 1  | 851 |
| NA        | chr18 | 73966247  | 73967169  | 0.499810634 | 0.535143385 | -0.035332751 | 2  | 852 |
| DNAJC5B   | chr8  | 66933795  | 67012751  | 0.585283823 | 0.646436801 | -0.061152978 | 4  | 853 |
| GAL       | chr11 | 68451247  | 68458643  | 0.798627162 | 0.741649328 | 0.056977834  | 13 | 854 |
| NA        | chr12 | 65277174  | 65371302  | 0.823878143 | 0.893786677 | -0.069908534 | 3  | 855 |
| NA        | chr7  | 44998598  | 45000508  | 0.890442863 | 0.815739606 | 0.074703257  | 1  | 856 |
| KRTAP3-3  | chr17 | 39149686  | 39150385  | 0.620842932 | 0.573471158 | 0.047371775  | 2  | 857 |
| NA        | chr7  | 95225994  | 95243031  | 0.340308899 | 0.308765427 | 0.031543472  | 7  | 858 |
| NA        | chr12 | 65860600  | 66036152  | 0.682248917 | 0.719307279 | -0.037058362 | 16 | 859 |
| NA        | chr2  | 130750175 | 130750678 | 0.39595998  | 0.432358398 | -0.036398418 | 1  | 860 |
| GJA10     | chr6  | 90604188  | 90605839  | 0.684797897 | 0.796037485 | -0.111239588 | 1  | 861 |
| NA        | chr4  | 66864564  | 67015730  | 0.478092181 | 0.524625584 | -0.046533403 | 3  | 862 |
| CST9L     | chr20 | 23545369  | 23549386  | 0.654980552 | 0.599977077 | 0.055003475  | 3  | 863 |
| NA        | chr8  | 62697606  | 62856739  | 0.769109325 | 0.832273547 | -0.063164223 | 10 | 864 |
| WBP1L     | chr10 | 104503727 | 104576021 | 0.592572363 | 0.631064079 | -0.038491717 | 24 | 865 |
| MGAM      | chr7  | 141607613 | 141806547 | 0.658847645 | 0.699165724 | -0.040318078 | 26 | 866 |
| NA        | chr1  | 192216635 | 192217077 | 0.316531738 | 0.409628825 | -0.093097087 | 1  | 867 |
| NA        | chr7  | 150130742 | 150145228 | 0.863466901 | 0.931431737 | -0.067964836 | 3  | 868 |
| IMPDH1P11 | chr16 | 10205239  | 10206742  | 0.599325969 | 0.676596885 | -0.077270916 | 2  | 869 |
| HNRNPABP1 | chr12 | 10264337  | 10265070  | 0.737015156 | 0.78639969  | -0.049384534 | 2  | 870 |
| PVRL3     | chr3  | 110788918 | 110994410 | 0.301971979 | 0.342156948 | -0.040184969 | 20 | 871 |
| MIR374A   | chrX  | 73507121  | 73507192  | 0.853485856 | 0.783092518 | 0.070393338  | 1  | 872 |
| NA        | chr12 | 15154767  | 15159617  | 0.411218931 | 0.485341347 | -0.074122416 | 1  | 873 |
| OR2B11    | chr1  | 247614255 | 247615308 | 0.801238697 | 0.838495575 | -0.037256878 | 5  | 874 |
| TAGLN     | chr11 | 117070037 | 117075498 | 0.786778177 | 0.817957326 | -0.031179148 | 4  | 875 |
| HEPHL1    | chr11 | 93754527  | 93846917  | 0.804587047 | 0.849026303 | -0.044439256 | 9  | 876 |
| NA        | chrX  | 40691097  | 40691815  | 0.825094151 | 0.757212713 | 0.067881439  | 1  | 877 |
| MIR449A   | chr5  | 54466360  | 54466450  | 0.844333539 | 0.774935909 | 0.06939763   | 1  | 878 |
| NA        | chr12 | 27699983  | 27705706  | 0.276011591 | 0.363142589 | -0.087130998 | 2  | 879 |
| NA        | chrX  | 71352000  | 71354556  | 0.33930993  | 0.381964807 | -0.042654877 | 3  | 880 |
| DCC       | chr18 | 49866542  | 51057784  | 0.391834273 | 0.42286835  | -0.031034077 | 17 | 881 |
| NA        | chr19 | 36279778  | 36288787  | 0.808033332 | 0.741735162 | 0.06629817   | 1  | 882 |
| HMG2P41   | chr16 | 35037240  | 35037651  | 0.495873152 | 0.578294224 | -0.082421072 | 1  | 883 |
| NA        | chr9  | 67017400  | 67032072  | 0.734872126 | 0.80039681  | -0.065524684 | 1  | 884 |
| OR56A3    | chr11 | 5968570   | 5969591   | 0.318154925 | 0.381346792 | -0.063191867 | 1  | 885 |
| NA        | chr19 | 55863669  | 55870884  | 0.506258996 | 0.537167405 | -0.030908409 | 25 | 886 |
| PZP       | chr12 | 9301436   | 9360966   | 0.836378868 | 0.892551455 | -0.056172587 | 4  | 887 |
| TRA2B     | chr3  | 185633694 | 185655924 | 0.220341884 | 0.255886358 | -0.035544474 | 10 | 888 |
| TRIM77    | chr11 | 89443467  | 89451040  | 0.478998606 | 0.551409396 | -0.07241079  | 2  | 889 |
| C12orf36  | chr12 | 13524023  | 13540101  | 0.535796885 | 0.571800159 | -0.036003274 | 4  | 890 |
| OR8Q1P    | chr11 | 124471480 | 124472134 | 0.664016111 | 0.570516377 | 0.093499734  | 1  | 891 |
| CRNN      | chr1  | 152381719 | 152386739 | 0.736882214 | 0.8056401   | -0.068757886 | 2  | 892 |
| PRKY      | chrY  | 7142013   | 7249589   | 0.408849176 | 0.371051347 | 0.037797829  | 2  | 893 |
| NA        | chr7  | 65584590  | 65629998  | 0.837317325 | 0.906042326 | -0.068725001 | 3  | 894 |
| MTERFD1   | chr8  | 97251626  | 97273838  | 0.378286354 | 0.421124048 | -0.042837694 | 5  | 895 |
| NA        | chr2  | 131588551 | 131594567 | 0.689455074 | 0.760296891 | -0.070841818 | 3  | 896 |
| ASF1A     | chr6  | 119215384 | 119230332 | 0.654439455 | 0.702589694 | -0.048150239 | 5  | 897 |
| NA        | chr17 | 21934958  | 21935393  | 0.640966594 | 0.734905683 | -0.093939089 | 1  | 898 |
| MUC17     | chr7  | 100663353 | 100702020 | 0.545655795 | 0.609913608 | -0.064257813 | 2  | 899 |
| NA        | chr16 | 17228361  | 17232593  | 0.710415585 | 0.773181113 | -0.062765528 | 2  | 900 |
| NA        | chr2  | 168149681 | 168414843 | 0.556435533 | 0.597085236 | -0.040649704 | 16 | 901 |
| NA        | chr16 | 732416    | 732870    | 0.266203933 | 0.348017489 | -0.081813556 | 1  | 902 |
| P2RX3     | chr11 | 57105848  | 57138073  | 0.673812519 | 0.711493139 | -0.03768062  | 10 | 903 |
| NA        | chr17 | 61044178  | 61045910  | 0.183583212 | 0.153071929 | 0.030511283  | 1  | 904 |
| LINC00608 | chr2  | 219840321 | 219844382 | 0.900690146 | 0.839916342 | 0.060773804  | 5  | 905 |
| AHSG      | chr3  | 186330712 | 186339107 | 0.567708695 | 0.614531535 | -0.04682284  | 9  | 906 |



|             |       |           |           |             |             |              |    |     |
|-------------|-------|-----------|-----------|-------------|-------------|--------------|----|-----|
| PNMA6A      | chrX  | 152240839 | 152340864 | 0.715603383 | 0.778393221 | -0.062789838 | 1  | 907 |
| NA          | chr4  | 137039830 | 137316626 | 0.614074068 | 0.664079951 | -0.050005884 | 7  | 908 |
| OR51G1      | chr11 | 4944531   | 4945637   | 0.368125424 | 0.28962993  | 0.078495493  | 1  | 909 |
| NA          | chr5  | 7363092   | 7364644   | 0.626420804 | 0.54523358  | 0.081187224  | 1  | 910 |
| NA          | chr17 | 1923246   | 1926958   | 0.81816115  | 0.752062207 | 0.066098943  | 2  | 911 |
| XPOT        | chr12 | 64798130  | 64844907  | 0.266419754 | 0.296842293 | -0.03042254  | 6  | 912 |
| NA          | chr5  | 58037408  | 58112926  | 0.826453471 | 0.879492974 | -0.053039502 | 3  | 913 |
| TAZ         | chrX  | 153639854 | 153650065 | 0.532669102 | 0.579063687 | -0.046394585 | 12 | 914 |
| NA          | chr11 | 5959981   | 5966214   | 0.804618175 | 0.863353468 | -0.058735293 | 3  | 915 |
| NA          | chr17 | 70017992  | 70030233  | 0.113587294 | 0.143962495 | -0.0303752   | 1  | 916 |
| NA          | chr17 | 70026432  | 70034889  | 0.113587294 | 0.143962495 | -0.0303752   | 1  | 917 |
| IGFBP2      | chr2  | 217497551 | 217529159 | 0.503741241 | 0.538954962 | -0.035213721 | 21 | 918 |
| STX16       | chr20 | 57226328  | 57254582  | 0.233253086 | 0.263623388 | -0.030370302 | 5  | 919 |
| IQCF3       | chr3  | 51851620  | 51864876  | 0.695553107 | 0.728063072 | -0.032509964 | 7  | 920 |
| TUSC7       | chr3  | 116428253 | 116442428 | 0.502006442 | 0.564660589 | -0.062654146 | 4  | 921 |
| NA          | chr17 | 43985036  | 43988145  | 0.630737605 | 0.579915169 | 0.050822436  | 1  | 922 |
| PHLDA2      | chr11 | 2949503   | 2950685   | 0.229255316 | 0.259588147 | -0.030332831 | 8  | 923 |
| NLRP3       | chr1  | 247579458 | 247612410 | 0.650119955 | 0.680428932 | -0.030308977 | 16 | 924 |
| NA          | chr1  | 202968866 | 202969480 | 0.794584553 | 0.864700352 | -0.070115799 | 1  | 925 |
| IFI27L1     | chr14 | 94547628  | 94570192  | 0.360658546 | 0.406943813 | -0.046285266 | 9  | 926 |
| NA          | chr4  | 105828514 | 106041157 | 0.221603605 | 0.175865212 | 0.045738392  | 2  | 927 |
| NA          | chr10 | 123687827 | 123711480 | 0.418353242 | 0.388182081 | 0.030171161  | 5  | 928 |
| SNORD115-40 | chr15 | 25488761  | 25488842  | 0.191574873 | 0.265642979 | -0.074068106 | 1  | 929 |
| NA          | chrX  | 119866948 | 119867250 | 0.787113324 | 0.855492627 | -0.068379303 | 1  | 930 |
| LRRRC10     | chr12 | 70002351  | 70004942  | 0.741899887 | 0.812693247 | -0.070793361 | 3  | 931 |
| SBF1P1      | chr8  | 56362069  | 56367699  | 0.65902642  | 0.704579995 | -0.045553575 | 8  | 932 |
| RAC2        | chr22 | 37621301  | 37640488  | 0.572683664 | 0.541860536 | 0.030823128  | 6  | 933 |
| MIR301B     | chr22 | 22007270  | 22007347  | 0.345627995 | 0.307811633 | 0.037816363  | 1  | 934 |
| NA          | chr1  | 177320722 | 177335408 | 0.196332365 | 0.1433986   | 0.052933765  | 1  | 935 |
| LINC00639   | chr14 | 39218545  | 39417477  | 0.812430395 | 0.865454896 | -0.053024501 | 3  | 936 |
| NA          | chr2  | 945320    | 945960    | 0.37175681  | 0.30514901  | 0.0666078    | 2  | 937 |
| NA          | chr8  | 86354080  | 86377144  | 0.191931483 | 0.22790399  | -0.035972508 | 9  | 938 |
| NA          | chr1  | 152346430 | 152417932 | 0.777781657 | 0.847150148 | -0.069368491 | 3  | 939 |
| DDX60L      | chr4  | 169277886 | 169458937 | 0.434602086 | 0.468862253 | -0.034260167 | 18 | 940 |
| NA          | chr8  | 109907258 | 110075646 | 0.354235311 | 0.429041733 | -0.074806422 | 2  | 941 |
| NA          | chrX  | 145701115 | 145702102 | 0.569088104 | 0.600876416 | -0.031788313 | 4  | 942 |
| NA          | chr12 | 131112861 | 131200826 | 0.663435839 | 0.707069159 | -0.043633321 | 69 | 943 |
| FEM1B       | chr15 | 68570141  | 68588203  | 0.157695404 | 0.195473967 | -0.037778563 | 7  | 944 |
| NA          | chr11 | 57154838  | 57191532  | 0.622945761 | 0.652924408 | -0.029978647 | 11 | 945 |
| SLC26A4     | chr7  | 107301080 | 107358254 | 0.479634587 | 0.509602311 | -0.029967724 | 16 | 946 |
| APOC2       | chr19 | 45450460  | 45452822  | 0.839825636 | 0.780171518 | 0.059654118  | 2  | 947 |
| SCGN        | chr6  | 25652464  | 25702011  | 0.361994366 | 0.396200599 | -0.034206233 | 7  | 948 |
| NA          | chr16 | 34740963  | 34741541  | 0.776591388 | 0.827505523 | -0.050914135 | 3  | 949 |
| PID1        | chr2  | 229715242 | 230136001 | 0.391274791 | 0.447649554 | -0.056374764 | 14 | 950 |
| DDX58       | chr9  | 32455300  | 32526322  | 0.829406862 | 0.883705087 | -0.054298226 | 4  | 951 |
| SLC13A1     | chr7  | 122753585 | 122840040 | 0.545084049 | 0.515218815 | 0.029865234  | 2  | 952 |
| AKAP5       | chr14 | 64932217  | 64936425  | 0.204461402 | 0.234316668 | -0.029855266 | 6  | 953 |
| BCAS1       | chr20 | 52553316  | 52687304  | 0.761164353 | 0.805954356 | -0.044790003 | 3  | 954 |
| NA          | chr4  | 56686169  | 56703548  | 0.743282393 | 0.806978707 | -0.063696313 | 1  | 955 |
| EXOC8       | chr1  | 231468480 | 231473598 | 0.198546592 | 0.228367009 | -0.029820417 | 16 | 956 |
| LRRRC38     | chr1  | 13801445  | 13840543  | 0.676067382 | 0.70588341  | -0.029816028 | 13 | 957 |
| TRIM34      | chr11 | 5640994   | 5665628   | 0.731400498 | 0.777255623 | -0.045855125 | 15 | 958 |
| NA          | chr2  | 63849309  | 63849965  | 0.71065854  | 0.77381973  | -0.06316119  | 2  | 959 |
| KIR3DL1     | chr19 | 55235969  | 55378448  | 0.55711052  | 0.587053331 | -0.029942811 | 51 | 960 |
| NA          | chr6  | 19535175  | 19839311  | 0.457471143 | 0.493642243 | -0.036171101 | 39 | 961 |
| NA          | chr5  | 179286013 | 179288283 | 0.251189286 | 0.291991435 | -0.04080215  | 4  | 962 |
| NA          | chr9  | 125372194 | 125401964 | 0.345495299 | 0.439311068 | -0.093815769 | 6  | 963 |
| WNK3        | chrX  | 54219256  | 54385075  | 0.499318865 | 0.539944518 | -0.040625653 | 6  | 964 |
| NA          | chr2  | 199747297 | 199936514 | 0.381172118 | 0.414110456 | -0.032938338 | 1  | 965 |
| S100A7      | chr1  | 153430220 | 153433177 | 0.254384604 | 0.299061012 | -0.044676408 | 3  | 966 |
| NA          | chr8  | 42409933  | 42410336  | 0.591897232 | 0.536022362 | 0.05587487   | 1  | 967 |
| GK2         | chr4  | 80327508  | 80329372  | 0.74863732  | 0.791741237 | -0.043103917 | 3  | 968 |
| SUN3        | chr7  | 48026745  | 48068716  | 0.712679527 | 0.661288071 | 0.051391456  | 9  | 969 |
| NA          | chr15 | 63967345  | 64005957  | 0.812503115 | 0.881461864 | -0.068958748 | 1  | 970 |
| NA          | chr14 | 51555675  | 51558006  | 0.860142431 | 0.792911442 | 0.067230988  | 1  | 971 |

|           |       |           |           |             |             |              |    |      |
|-----------|-------|-----------|-----------|-------------|-------------|--------------|----|------|
| NA        | chr12 | 119210837 | 119212942 | 0.528025357 | 0.47972353  | 0.048301827  | 5  | 972  |
| NA        | chr5  | 97745939  | 97747496  | 0.625262348 | 0.675907713 | -0.050645366 | 2  | 973  |
| ENDOD1    | chr11 | 94822974  | 94865809  | 0.502729097 | 0.539091202 | -0.036362105 | 9  | 974  |
| CXCL9     | chr4  | 76922428  | 76928641  | 0.894847595 | 0.830103652 | 0.064743944  | 2  | 975  |
| NA        | chr8  | 128098508 | 128099755 | 0.501275323 | 0.555600148 | -0.054324825 | 1  | 976  |
| NA        | chr4  | 11742572  | 11771092  | 0.713017175 | 0.55506793  | 0.157949245  | 1  | 977  |
| NA        | chr5  | 149987990 | 149994916 | 0.908235829 | 0.837520873 | 0.070714957  | 1  | 978  |
| LINC00923 | chr15 | 98285448  | 98417780  | 0.817090083 | 0.882745052 | -0.065654969 | 2  | 979  |
| NA        | chrX  | 51099796  | 51139314  | 0.396008263 | 0.447714515 | -0.051706252 | 8  | 980  |
| NA        | chr16 | 18096663  | 18266920  | 0.187450006 | 0.244968927 | -0.057518921 | 3  | 981  |
| ZBED2     | chr3  | 111311747 | 111314290 | 0.625090641 | 0.663300432 | -0.038209791 | 4  | 982  |
| NA        | chr7  | 22893875  | 22901021  | 0.373194181 | 0.402728395 | -0.029534215 | 10 | 983  |
| DLST      | chr14 | 75348594  | 75370448  | 0.281623129 | 0.328102413 | -0.046479284 | 5  | 984  |
| OR5AN1    | chr11 | 59131885  | 59132921  | 0.132873193 | 0.233296946 | -0.100423754 | 1  | 985  |
| C14orf64  | chr14 | 98391947  | 98444461  | 0.422982708 | 0.452497984 | -0.029515276 | 3  | 986  |
| PIK3CA    | chr3  | 178865902 | 178957881 | 0.291960861 | 0.321470082 | -0.02950922  | 11 | 987  |
| NA        | chr4  | 157555646 | 157563606 | 0.840887627 | 0.775679217 | 0.06520841   | 1  | 988  |
| FABP2     | chr4  | 120238405 | 120243545 | 0.636380496 | 0.693846595 | -0.057466099 | 3  | 989  |
| KRT33B    | chr17 | 39519746  | 39526052  | 0.781811231 | 0.819795372 | -0.037984141 | 4  | 990  |
| AIF1L     | chr9  | 133971863 | 133998539 | 0.54250323  | 0.580889676 | -0.038386446 | 5  | 991  |
| RPLP0P2   | chr11 | 61382508  | 61406921  | 0.737428346 | 0.769192471 | -0.031764126 | 3  | 992  |
| TAS2R40   | chr7  | 142919130 | 142920162 | 0.662003374 | 0.702057007 | -0.040053633 | 2  | 993  |
| NA        | chr1  | 61005921  | 61106163  | 0.387242786 | 0.416579698 | -0.029336913 | 3  | 994  |
| NA        | chr6  | 134749378 | 134841723 | 0.734163391 | 0.784947006 | -0.050783615 | 5  | 995  |
| CDC42SE1  | chr1  | 151023447 | 151042801 | 0.316907774 | 0.346227268 | -0.029319494 | 24 | 996  |
| WDR5B     | chr3  | 122130715 | 122134882 | 0.085517738 | 0.114821063 | -0.029303326 | 3  | 997  |
| IMPA1P    | chr8  | 82517804  | 82543369  | 0.811709639 | 0.761215989 | 0.05049365   | 7  | 998  |
| NA        | chr2  | 6636135   | 6643938   | 0.615313461 | 0.677529165 | -0.062215704 | 7  | 999  |
| ENO2      | chr12 | 7022909   | 7032861   | 0.538329714 | 0.49797063  | 0.040359084  | 15 | 1000 |

**Supplementary Table S3. List of the 1,000 top-ranked, differentially methylated CGIs after induced overexpression of *TET1*.**

This table is related to Fig. 2C.

| CGI                       | chromosome | start     | end       | beta.TET1+Dox | beta.TET1-Dox | difference   | num.sites | rank |
|---------------------------|------------|-----------|-----------|---------------|---------------|--------------|-----------|------|
| chr1:158119489-158119704  | chr1       | 158119489 | 158119704 | 0.083231257   | 0.266035827   | -0.18280457  | 4         | 1    |
| chr19:15619224-15619613   | chr19      | 15619224  | 15619613  | 0.165546679   | 0.352916775   | -0.187370096 | 3         | 2    |
| chr9:99540026-99540472    | chr9       | 99540026  | 99540472  | 0.057398485   | 0.196285722   | -0.138887237 | 3         | 3    |
| chr2:88650248-88650686    | chr2       | 88650248  | 88650686  | 0.258580389   | 0.426194027   | -0.167613638 | 4         | 4    |
| chr3:72788073-72788416    | chr3       | 72788073  | 72788416  | 0.239107279   | 0.444377539   | -0.205270261 | 3         | 5    |
| chr20:4152867-4153398     | chr20      | 4152867   | 4153398   | 0.106261466   | 0.241809836   | -0.135548371 | 3         | 6    |
| chr9:112262011-112262317  | chr9       | 112262011 | 112262317 | 0.263175696   | 0.474672877   | -0.211497181 | 1         | 7    |
| chr16:67208068-67208678   | chr16      | 67208068  | 67208678  | 0.31323473    | 0.435778555   | -0.122543825 | 3         | 8    |
| chr3:125898663-125899568  | chr3       | 125898663 | 125899568 | 0.087088685   | 0.246835842   | -0.159747157 | 9         | 9    |
| chr12:186864-187610       | chr12      | 186864    | 187610    | 0.400301438   | 0.539151779   | -0.138850341 | 3         | 10   |
| chr8:37557928-37558887    | chr8       | 37557928  | 37558887  | 0.195238965   | 0.344873549   | -0.149634583 | 2         | 11   |
| chr12:132990778-132990987 | chr12      | 132990778 | 132990987 | 0.208831816   | 0.363535841   | -0.154704025 | 3         | 12   |
| chr1:45082740-45083285    | chr1       | 45082740  | 45083285  | 0.321843876   | 0.502992355   | -0.181148479 | 6         | 13   |
| chr16:4363936-4364151     | chr16      | 4363936   | 4364151   | 0.14092594    | 0.251360407   | -0.110434468 | 3         | 14   |
| chr11:47615711-47616055   | chr11      | 47615711  | 47616055  | 0.173370704   | 0.377760502   | -0.204389798 | 1         | 15   |
| chr7:19145873-19146256    | chr7       | 19145873  | 19146256  | 0.150071951   | 0.372057135   | -0.221985185 | 2         | 16   |
| chr12:98850691-98851002   | chr12      | 98850691  | 98851002  | 0.116047161   | 0.241776758   | -0.125729597 | 4         | 17   |
| chr4:8594413-8594777      | chr4       | 8594413   | 8594777   | 0.258169775   | 0.398254677   | -0.140084903 | 4         | 18   |
| chr19:18319146-18319363   | chr19      | 18319146  | 18319363  | 0.138805497   | 0.244914913   | -0.106109417 | 2         | 19   |
| chr5:72746990-72747587    | chr5       | 72746990  | 72747587  | 0.314632117   | 0.429370621   | -0.114738504 | 3         | 20   |
| chr19:15662114-15662358   | chr19      | 15662114  | 15662358  | 0.227209994   | 0.328967577   | -0.101757583 | 2         | 21   |
| chr17:60885409-60885857   | chr17      | 60885409  | 60885857  | 0.413090469   | 0.604865998   | -0.191775528 | 4         | 22   |
| chrX:129118346-129118690  | chrX       | 129118346 | 129118690 | 0.177589113   | 0.363192929   | -0.185603816 | 1         | 23   |
| chr7:100253783-100254150  | chr7       | 100253783 | 100254150 | 0.360889263   | 0.489823234   | -0.128933971 | 5         | 24   |
| chr9:77111779-77112042    | chr9       | 77111779  | 77112042  | 0.171967229   | 0.266203405   | -0.094236176 | 1         | 25   |
| chr9:16828936-16829169    | chr9       | 16828936  | 16829169  | 0.183215258   | 0.381984702   | -0.198769444 | 1         | 26   |
| chr5:139076543-139077179  | chr5       | 139076543 | 139077179 | 0.202190646   | 0.297694396   | -0.09550375  | 5         | 27   |
| chr6:73972820-73973027    | chr6       | 73972820  | 73973027  | 0.058056631   | 0.176190202   | -0.118133571 | 3         | 28   |
| chr19:3687787-3688262     | chr19      | 3687787   | 3688262   | 0.287700849   | 0.164730195   | 0.122970654  | 4         | 29   |
| chr18:77905298-77905566   | chr18      | 77905298  | 77905566  | 0.385183209   | 0.528703148   | -0.143519939 | 5         | 30   |
| chr4:74719088-74719339    | chr4       | 74719088  | 74719339  | 0.329761906   | 0.50218856    | -0.172426654 | 3         | 31   |
| chr9:71650647-71651176    | chr9       | 71650647  | 71651176  | 0.072242007   | 0.16402858    | -0.091786573 | 2         | 32   |
| chr10:112431836-112432426 | chr10      | 112431836 | 112432426 | 0.183934701   | 0.272102573   | -0.088167872 | 7         | 33   |
| chr7:1265112-1265379      | chr7       | 1265112   | 1265379   | 0.122597066   | 0.232472743   | -0.109875677 | 3         | 34   |
| chr12:109729573-109729826 | chr12      | 109729573 | 109729826 | 0.303954679   | 0.42912124    | -0.125166561 | 3         | 35   |
| chr7:150652808-150653080  | chr7       | 150652808 | 150653080 | 0.433954052   | 0.518967285   | -0.085013233 | 5         | 36   |
| chr19:41732007-41732556   | chr19      | 41732007  | 41732556  | 0.13308835    | 0.227159268   | -0.094070918 | 3         | 37   |
| chr10:133058339-133058609 | chr10      | 133058339 | 133058609 | 0.29893558    | 0.405565443   | -0.106629863 | 2         | 38   |
| chr13:113656117-113656379 | chr13      | 113656117 | 113656379 | 0.283157134   | 0.392325158   | -0.109168023 | 2         | 39   |
| chr1:27286066-27287101    | chr1       | 27286066  | 27287101  | 0.189491181   | 0.312946393   | -0.123455212 | 6         | 40   |
| chr7:157690560-157690770  | chr7       | 157690560 | 157690770 | 0.431724584   | 0.537017146   | -0.105292561 | 4         | 41   |
| chr19:31210518-31210884   | chr19      | 31210518  | 31210884  | 0.20950321    | 0.291776521   | -0.082273311 | 3         | 42   |
| chr12:131303094-131303836 | chr12      | 131303094 | 131303836 | 0.173767293   | 0.284457887   | -0.110690594 | 7         | 43   |
| chr17:34997844-34998760   | chr17      | 34997844  | 34998760  | 0.076449118   | 0.15784926    | -0.081400142 | 2         | 44   |
| chr14:74100344-74101230   | chr14      | 74100344  | 74101230  | 0.232718561   | 0.325841814   | -0.093123252 | 4         | 45   |
| chr14:42075859-42076329   | chr14      | 42075859  | 42076329  | 0.14457537    | 0.271883055   | -0.127307685 | 2         | 46   |
| chr2:242549374-242549995  | chr2       | 242549374 | 242549995 | 0.176253851   | 0.25556502    | -0.079311169 | 4         | 47   |
| chrX:101397306-101397514  | chrX       | 101397306 | 101397514 | 0.249608118   | 0.336427747   | -0.086819629 | 1         | 48   |
| chr12:56039989-56040337   | chr12      | 56039989  | 56040337  | 0.208683548   | 0.313736692   | -0.105053144 | 5         | 49   |
| chr21:42792294-42792704   | chr21      | 42792294  | 42792704  | 0.208701646   | 0.32051079    | -0.111809145 | 5         | 50   |
| chr1:116961183-116961542  | chr1       | 116961183 | 116961542 | 0.070156835   | 0.146581995   | -0.076425161 | 7         | 51   |
| chr8:72755784-72756667    | chr8       | 72755784  | 72756667  | 0.221311369   | 0.313174216   | -0.091862847 | 6         | 52   |
| chr9:127212625-127213064  | chr9       | 127212625 | 127213064 | 0.06625163    | 0.145397006   | -0.079145377 | 1         | 53   |
| chr9:32572997-32573227    | chr9       | 32572997  | 32573227  | 0.07266985    | 0.147935283   | -0.075265433 | 1         | 54   |
| chr10:20106644-20106946   | chr10      | 20106644  | 20106946  | 0.128640472   | 0.238486063   | -0.109845591 | 3         | 55   |
| chr1:43814306-43815277    | chr1       | 43814306  | 43815277  | 0.274371037   | 0.367128258   | -0.092757221 | 5         | 56   |
| chr4:155547985-155548322  | chr4       | 155547985 | 155548322 | 0.289842796   | 0.39142277    | -0.101579974 | 5         | 57   |
| chr10:49348138-49348676   | chr10      | 49348138  | 49348676  | 0.32913971    | 0.535995281   | -0.206855571 | 1         | 58   |
| chr19:55450823-55451128   | chr19      | 55450823  | 55451128  | 0.827913353   | 0.627832545   | 0.200080807  | 1         | 59   |
| chr19:47733885-47734806   | chr19      | 47733885  | 47734806  | 0.087577334   | 0.194006492   | -0.106429158 | 5         | 60   |
| chr18:712233-713086       | chr18      | 712233    | 713086    | 0.275123726   | 0.349005622   | -0.073881896 | 6         | 61   |
| chr19:2613933-2614133     | chr19      | 2613933   | 2614133   | 0.151279051   | 0.260485356   | -0.109206305 | 3         | 62   |
| chr2:220222903-220223854  | chr2       | 220222903 | 220223854 | 0.302858409   | 0.375662287   | -0.072803878 | 5         | 63   |
| chr16:32252570-32252823   | chr16      | 32252570  | 32252823  | 0.530213596   | 0.692413168   | -0.162199572 | 1         | 64   |
| chr11:30040073-30040294   | chr11      | 30040073  | 30040294  | 0.75994458    | 0.582077891   | 0.177866688  | 2         | 65   |
| chr22:17090456-17091224   | chr22      | 17090456  | 17091224  | 0.429053164   | 0.541608716   | -0.112555552 | 4         | 66   |
| chr16:29093366-29093833   | chr16      | 29093366  | 29093833  | 0.076665797   | 0.156252687   | -0.07958689  | 1         | 67   |
| chr7:149469543-149469748  | chr7       | 149469543 | 149469748 | 0.179814275   | 0.250298784   | -0.070484509 | 1         | 68   |
| chr12:105478090-105478517 | chr12      | 105478090 | 105478517 | 0.511814154   | 0.643220169   | -0.131406015 | 7         | 69   |
| chrX:154493304-154493907  | chrX       | 154493304 | 154493907 | 0.390252183   | 0.489136649   | -0.098884465 | 4         | 70   |

|                           |       |           |           |             |             |              |    |     |
|---------------------------|-------|-----------|-----------|-------------|-------------|--------------|----|-----|
| chr10:31422710-31423316   | chr10 | 31422710  | 31423316  | 0.417412862 | 0.541521967 | -0.124109105 | 3  | 71  |
| chr16:24267041-24267527   | chr16 | 24267041  | 24267527  | 0.12329438  | 0.198536397 | -0.075242017 | 3  | 72  |
| chr20:62947649-62948464   | chr20 | 62947649  | 62948464  | 0.087877352 | 0.179149916 | -0.091272564 | 3  | 73  |
| chr9:129677707-129678009  | chr9  | 129677707 | 129678009 | 0.171626484 | 0.240156164 | -0.06852968  | 2  | 74  |
| chr11:132952539-132953307 | chr11 | 132952539 | 132953307 | 0.124149424 | 0.223827107 | -0.099677684 | 2  | 75  |
| chr17:14200580-14200996   | chr17 | 14200580  | 14200996  | 0.416190735 | 0.484131252 | -0.067940517 | 2  | 76  |
| chr14:24020003-24020251   | chr14 | 24020003  | 24020251  | 0.307096299 | 0.411948781 | -0.104852482 | 3  | 77  |
| chr19:54369388-54369809   | chr19 | 54369388  | 54369809  | 0.455204585 | 0.522592706 | -0.06738812  | 8  | 78  |
| chr15:85291080-85291697   | chr15 | 85291080  | 85291697  | 0.115069278 | 0.193685146 | -0.078615868 | 3  | 79  |
| chr9:35111268-35111504    | chr9  | 35111268  | 35111504  | 0.149083957 | 0.216414274 | -0.067330317 | 1  | 80  |
| chr13:111719705-111720014 | chr13 | 111719705 | 111720014 | 0.368831937 | 0.467609887 | -0.09877795  | 3  | 81  |
| chr14:71288404-71288957   | chr14 | 71288404  | 71288957  | 0.080048791 | 0.147358548 | -0.067309756 | 2  | 82  |
| chr6:55039171-55039392    | chr6  | 55039171  | 55039392  | 0.079446285 | 0.147668657 | -0.068222372 | 4  | 83  |
| chrX:34148741-34148957    | chrX  | 34148741  | 34148957  | 0.506156856 | 0.622894643 | -0.116737787 | 2  | 84  |
| chr2:102758807-102759577  | chr2  | 102758807 | 102759577 | 0.626507029 | 0.515093975 | 0.111413054  | 3  | 85  |
| chr11:58873890-58874486   | chr11 | 58873890  | 58874486  | 0.106141516 | 0.174567816 | -0.068426299 | 3  | 86  |
| chr17:35014273-35014596   | chr17 | 35014273  | 35014596  | 0.046234956 | 0.120812754 | -0.074577798 | 3  | 87  |
| chr12:54811982-54812202   | chr12 | 54811982  | 54812202  | 0.474306653 | 0.604253639 | -0.129946986 | 2  | 88  |
| chr16:55542921-55543274   | chr16 | 55542921  | 55543274  | 0.060905817 | 0.149465381 | -0.088559564 | 5  | 89  |
| chr1:50798668-50799536    | chr1  | 50798668  | 50799536  | 0.056353316 | 0.121282125 | -0.064928809 | 5  | 90  |
| chr19:46119455-46119815   | chr19 | 46119455  | 46119815  | 0.1880379   | 0.313143817 | -0.125105917 | 2  | 91  |
| chr13:88326601-88326919   | chr13 | 88326601  | 88326919  | 0.568242325 | 0.441558888 | 0.126683437  | 3  | 92  |
| chr13:108518335-108518633 | chr13 | 108518335 | 108518633 | 0.176461309 | 0.112604507 | 0.063856803  | 3  | 93  |
| chr8:121137100-121137778  | chr8  | 121137100 | 121137778 | 0.181024047 | 0.244850785 | -0.063826739 | 4  | 94  |
| chr14:72398665-72399554   | chr14 | 72398665  | 72399554  | 0.217317601 | 0.12578557  | 0.091532031  | 4  | 95  |
| chr6:167275721-167276626  | chr6  | 167275721 | 167276626 | 0.219647082 | 0.295924366 | -0.076277284 | 12 | 96  |
| chr10:74079337-74079861   | chr10 | 74079337  | 74079861  | 0.145554531 | 0.208051535 | -0.062497004 | 4  | 97  |
| chr14:85996495-85996958   | chr14 | 85996495  | 85996958  | 0.339643353 | 0.24768681  | 0.091956543  | 4  | 98  |
| chrX:103809795-103810167  | chrX  | 103809795 | 103810167 | 0.69960913  | 0.623073764 | 0.076535366  | 3  | 99  |
| chr20:25058289-25058726   | chr20 | 25058289  | 25058726  | 0.370442323 | 0.538676119 | -0.168233796 | 2  | 100 |
| chr16:75550614-75551426   | chr16 | 75550614  | 75551426  | 0.095186043 | 0.164179305 | -0.068993263 | 3  | 101 |
| chr1:85358360-85359187    | chr1  | 85358360  | 85359187  | 0.12968887  | 0.189982852 | -0.060293982 | 6  | 102 |
| chr5:41869664-41870876    | chr5  | 41869664  | 41870876  | 0.269529422 | 0.368284204 | -0.098754782 | 10 | 103 |
| chr8:33456916-33457515    | chr8  | 33456916  | 33457515  | 0.460878488 | 0.559418338 | -0.098539849 | 6  | 104 |
| chr17:46697414-46697701   | chr17 | 46697414  | 46697701  | 0.427710936 | 0.542249734 | -0.114538798 | 3  | 105 |
| chr4:3464800-3465440      | chr4  | 3464800   | 3465440   | 0.397006168 | 0.483601637 | -0.086595468 | 8  | 106 |
| chr17:46619088-46619314   | chr17 | 46619088  | 46619314  | 0.085464266 | 0.219132203 | -0.133667936 | 2  | 107 |
| chr20:39316040-39316322   | chr20 | 39316040  | 39316322  | 0.550858118 | 0.661624522 | -0.110766404 | 3  | 108 |
| chrX:153569548-153571439  | chrX  | 153569548 | 153571439 | 0.345497136 | 0.429611817 | -0.084114681 | 1  | 109 |
| chr1:15929824-15930289    | chr1  | 15929824  | 15930289  | 0.044262682 | 0.113141225 | -0.068878543 | 4  | 110 |
| chrX:51138954-51139255    | chrX  | 51138954  | 51139255  | 0.269306525 | 0.371006494 | -0.101699969 | 4  | 111 |
| chr19:53757820-53758148   | chr19 | 53757820  | 53758148  | 0.364580976 | 0.306093401 | 0.058487576  | 3  | 112 |
| chr7:150942305-150943033  | chr7  | 150942305 | 150943033 | 0.205210092 | 0.303651044 | -0.098440953 | 3  | 113 |
| chr19:58175624-58176104   | chr19 | 58175624  | 58176104  | 0.101819118 | 0.168739869 | -0.066920752 | 3  | 114 |
| chr3:11195902-11196552    | chr3  | 11195902  | 11196552  | 0.388221251 | 0.447926907 | -0.059705656 | 2  | 115 |
| chr19:51568155-51568412   | chr19 | 51568155  | 51568412  | 0.286711711 | 0.377705585 | -0.090993874 | 3  | 116 |
| chr11:8289533-8290322     | chr11 | 8289533   | 8290322   | 0.313681724 | 0.379591799 | -0.065910076 | 5  | 117 |
| chr11:111410933-111412199 | chr11 | 111410933 | 111412199 | 0.480506034 | 0.537771278 | -0.057265244 | 11 | 118 |
| chr1:244213398-244213619  | chr1  | 244213398 | 244213619 | 0.219847228 | 0.293176581 | -0.073329352 | 4  | 119 |
| chr10:103535637-103536505 | chr10 | 103535637 | 103536505 | 0.609857389 | 0.677484234 | -0.067626845 | 5  | 120 |
| chr1:110185962-110186164  | chr1  | 110185962 | 110186164 | 0.133203766 | 0.189054217 | -0.055850451 | 4  | 121 |
| chr4:134071663-134073628  | chr4  | 134071663 | 134073628 | 0.363454447 | 0.419117733 | -0.055663286 | 5  | 122 |
| chr9:120507228-120507642  | chr9  | 120507228 | 120507642 | 0.568190501 | 0.419185181 | 0.14900532   | 2  | 123 |
| chr15:78236689-78237084   | chr15 | 78236689  | 78237084  | 0.136575074 | 0.192236062 | -0.055660988 | 3  | 124 |
| chr9:137217063-137218078  | chr9  | 137217063 | 137218078 | 0.105942014 | 0.181737523 | -0.075795509 | 2  | 125 |
| chr8:1949246-1951390      | chr8  | 1949246   | 1951390   | 0.532473478 | 0.477702523 | 0.054770955  | 7  | 126 |
| chrX:149736721-149737756  | chrX  | 149736721 | 149737756 | 0.415758429 | 0.493323351 | -0.077564922 | 8  | 127 |
| chr12:118499104-118499473 | chr12 | 118499104 | 118499473 | 0.425691407 | 0.348740892 | 0.076950515  | 1  | 128 |
| chr9:707022-707420        | chr9  | 707022    | 707420    | 0.07858401  | 0.132325974 | -0.053741963 | 3  | 129 |
| chr16:34295487-34296109   | chr16 | 34295487  | 34296109  | 0.377113517 | 0.43046597  | -0.053352453 | 3  | 130 |
| chr9:138156711-138156983  | chr9  | 138156711 | 138156983 | 0.882406975 | 0.726715518 | 0.155691457  | 1  | 131 |
| chr5:139492724-139492966  | chr5  | 139492724 | 139492966 | 0.153685746 | 0.214948631 | -0.061262885 | 2  | 132 |
| chr12:113772634-113772934 | chr12 | 113772634 | 113772934 | 0.123285202 | 0.195587893 | -0.07230269  | 3  | 133 |
| chr1:201708788-201709429  | chr1  | 201708788 | 201709429 | 0.316267154 | 0.368267212 | -0.052000058 | 7  | 134 |
| chr19:9517469-9517986     | chr19 | 9517469   | 9517986   | 0.449457664 | 0.371329923 | 0.078127741  | 3  | 135 |
| chr9:117160140-117161064  | chr9  | 117160140 | 117161064 | 0.1563382   | 0.209797333 | -0.053459133 | 2  | 136 |
| chr14:105332409-105332651 | chr14 | 105332409 | 105332651 | 0.215615814 | 0.287445154 | -0.07182934  | 3  | 137 |
| chr12:125534061-125534527 | chr12 | 125534061 | 125534527 | 0.155473599 | 0.20688085  | -0.05140725  | 2  | 138 |
| chr18:47087076-47087446   | chr18 | 47087076  | 47087446  | 0.225299632 | 0.280736084 | -0.055436452 | 3  | 139 |
| chr8:104152727-104153390  | chr8  | 104152727 | 104153390 | 0.387864269 | 0.46948864  | -0.081624371 | 4  | 140 |
| chr9:127539240-127540081  | chr9  | 127539240 | 127540081 | 0.598971774 | 0.51417577  | 0.084796004  | 4  | 141 |
| chr11:131560938-131561613 | chr11 | 131560938 | 131561613 | 0.704443369 | 0.770086829 | -0.06564346  | 3  | 142 |
| chr19:42416993-42417513   | chr19 | 42416993  | 42417513  | 0.286974724 | 0.370337302 | -0.083362578 | 3  | 143 |

|                           |       |           |           |             |             |              |    |     |
|---------------------------|-------|-----------|-----------|-------------|-------------|--------------|----|-----|
| chr5:52777789-52777996    | chr5  | 52777789  | 52777996  | 0.121728969 | 0.201831578 | -0.080102609 | 2  | 144 |
| chr16:88803803-88804112   | chr16 | 88803803  | 88804112  | 0.088260215 | 0.138733849 | -0.050473634 | 4  | 145 |
| chr3:187455331-187455843  | chr3  | 187455331 | 187455843 | 0.257818672 | 0.308256605 | -0.050437933 | 4  | 146 |
| chr8:1495106-1495333      | chr8  | 1495106   | 1495333   | 0.629841384 | 0.725667827 | -0.095826443 | 4  | 147 |
| chr10:135450884-135451867 | chr10 | 135450884 | 135451867 | 0.295120557 | 0.35462059  | -0.059500033 | 1  | 148 |
| chr13:112063570-112064022 | chr13 | 112063570 | 112064022 | 0.188871874 | 0.273336648 | -0.084464774 | 2  | 149 |
| chr3:38179858-38180689    | chr3  | 38179858  | 38180689  | 0.454485186 | 0.573673809 | -0.119188623 | 10 | 150 |
| chr8:1327332-1327547      | chr8  | 1327332   | 1327547   | 0.661256918 | 0.750202045 | -0.088945127 | 4  | 151 |
| chr19:49522774-49523093   | chr19 | 49522774  | 49523093  | 0.392482724 | 0.330977296 | 0.061505428  | 3  | 152 |
| chr17:20811749-20812158   | chr17 | 20811749  | 20812158  | 0.247857231 | 0.368263231 | -0.120406    | 4  | 153 |
| chr4:2305515-2305793      | chr4  | 2305515   | 2305793   | 0.167582553 | 0.258512759 | -0.090930205 | 1  | 154 |
| chr3:6904134-6904641      | chr3  | 6904134   | 6904641   | 0.319429036 | 0.384647783 | -0.065218747 | 4  | 155 |
| chr6:161352085-161352386  | chr6  | 161352085 | 161352386 | 0.504251571 | 0.591513152 | -0.087261582 | 2  | 156 |
| chr21:46897842-46898158   | chr21 | 46897842  | 46898158  | 0.124456512 | 0.174123823 | -0.049667311 | 2  | 157 |
| chr2:223183014-223185468  | chr2  | 223183014 | 223185468 | 0.157697134 | 0.208085771 | -0.050388637 | 7  | 158 |
| chr21:40032244-40033665   | chr21 | 40032244  | 40033665  | 0.43434343  | 0.495268673 | -0.060925243 | 4  | 159 |
| chr12:119212111-119212393 | chr12 | 119212111 | 119212393 | 0.636369136 | 0.567001526 | 0.06936761   | 4  | 160 |
| chr9:41954479-41954842    | chr9  | 41954479  | 41954842  | 0.283315727 | 0.33901296  | -0.055697233 | 1  | 161 |
| chr20:10152769-10153193   | chr20 | 10152769  | 10153193  | 0.194696315 | 0.14549643  | 0.049199885  | 3  | 162 |
| chr6:27833121-27833406    | chr6  | 27833121  | 27833406  | 0.491216466 | 0.587251818 | -0.096035352 | 4  | 163 |
| chr5:2643106-2643309      | chr5  | 2643106   | 2643309   | 0.343063372 | 0.410374179 | -0.067310807 | 3  | 164 |
| chr17:37380954-37382363   | chr17 | 37380954  | 37382363  | 0.410644986 | 0.458860169 | -0.048215183 | 10 | 165 |
| chr12:49735720-49736875   | chr12 | 49735720  | 49736875  | 0.570901161 | 0.654514839 | -0.083613678 | 4  | 166 |
| chr8:65491084-65491319    | chr8  | 65491084  | 65491319  | 0.71824629  | 0.612574091 | 0.1056722    | 3  | 167 |
| chr19:42501262-42501486   | chr19 | 42501262  | 42501486  | 0.135328605 | 0.193110878 | -0.057782272 | 2  | 168 |
| chr19:11353961-11354362   | chr19 | 11353961  | 11354362  | 0.206753693 | 0.254500095 | -0.047746402 | 4  | 169 |
| chr1:32713919-32714186    | chr1  | 32713919  | 32714186  | 0.371190997 | 0.424385942 | -0.053194945 | 4  | 170 |
| chr19:40376868-40377136   | chr19 | 40376868  | 40377136  | 0.601118589 | 0.735430021 | -0.134311432 | 1  | 171 |
| chrX:39021663-39022131    | chrX  | 39021663  | 39022131  | 0.654402341 | 0.553889346 | 0.100512996  | 1  | 172 |
| chrX:54208940-54209723    | chrX  | 54208940  | 54209723  | 0.461319259 | 0.543734728 | -0.082415469 | 6  | 173 |
| chr1:17746201-17746547    | chr1  | 17746201  | 17746547  | 0.510784577 | 0.557802569 | -0.047017992 | 5  | 174 |
| chr6:170921394-170921775  | chr6  | 170921394 | 170921775 | 0.26867543  | 0.221696093 | 0.046979337  | 1  | 175 |
| chr6:154360587-154361008  | chr6  | 154360587 | 154361008 | 0.351871161 | 0.41161459  | -0.059743429 | 4  | 176 |
| chr19:51843076-51843926   | chr19 | 51843076  | 51843926  | 0.335617341 | 0.229142858 | 0.106474483  | 2  | 177 |
| chr11:47376652-47377236   | chr11 | 47376652  | 47377236  | 0.308954286 | 0.381986122 | -0.073031835 | 3  | 178 |
| chr9:131965038-131965636  | chr9  | 131965038 | 131965636 | 0.281991537 | 0.2132102   | 0.068781336  | 4  | 179 |
| chr9:114361411-114361760  | chr9  | 114361411 | 114361760 | 0.251395894 | 0.387879648 | -0.136483755 | 1  | 180 |
| chr1:27854417-27854963    | chr1  | 27854417  | 27854963  | 0.183229353 | 0.136674052 | 0.0465553    | 4  | 181 |
| chr11:49071438-49071764   | chr11 | 49071438  | 49071764  | 0.834502146 | 0.719256812 | 0.115245334  | 2  | 182 |
| chr16:7568196-7568413     | chr16 | 7568196   | 7568413   | 0.666834599 | 0.756834128 | -0.089999529 | 2  | 183 |
| chr19:42497820-42498560   | chr19 | 42497820  | 42498560  | 0.162161247 | 0.208412916 | -0.046251669 | 3  | 184 |
| chrY:6134499-6134748      | chrY  | 6134499   | 6134748   | 0.208383156 | 0.257553544 | -0.049170388 | 1  | 185 |
| chr9:98273679-98273908    | chr9  | 98273679  | 98273908  | 0.080915911 | 0.126786233 | -0.045870321 | 1  | 186 |
| chr2:11924984-11925253    | chr2  | 11924984  | 11925253  | 0.453858439 | 0.505836991 | -0.051978552 | 3  | 187 |
| chr9:68726057-68726939    | chr9  | 68726057  | 68726939  | 0.289773257 | 0.354112594 | -0.064339337 | 1  | 188 |
| chr11:64611715-64612634   | chr11 | 64611715  | 64612634  | 0.129478667 | 0.184396605 | -0.054917938 | 5  | 189 |
| chr2:231902027-231903122  | chr2  | 231902027 | 231903122 | 0.510585742 | 0.426393678 | 0.084192064  | 3  | 190 |
| chrX:136629545-136630303  | chrX  | 136629545 | 136630303 | 0.480330514 | 0.527126912 | -0.046796398 | 5  | 191 |
| chr7:138666359-138666972  | chr7  | 138666359 | 138666972 | 0.302695218 | 0.397387429 | -0.094692211 | 2  | 192 |
| chr4:113445023-113445350  | chr4  | 113445023 | 113445350 | 0.093293643 | 0.224326747 | -0.131033105 | 2  | 193 |
| chr16:3493099-3493569     | chr16 | 3493099   | 3493569   | 0.504377529 | 0.58435585  | -0.079978321 | 6  | 194 |
| chr7:6676455-6676785      | chr7  | 6676455   | 6676785   | 0.081343113 | 0.138080344 | -0.056737231 | 2  | 195 |
| chr21:28515803-28516306   | chr21 | 28515803  | 28516306  | 0.424179201 | 0.506073885 | -0.081894684 | 3  | 196 |
| chr11:44971049-44972685   | chr11 | 44971049  | 44972685  | 0.25007386  | 0.307241665 | -0.057167804 | 11 | 197 |
| chr3:87101768-87102008    | chr3  | 87101768  | 87102008  | 0.348477253 | 0.408817766 | -0.060340513 | 2  | 198 |
| chr2:229045958-229046553  | chr2  | 229045958 | 229046553 | 0.262292619 | 0.320445349 | -0.05815273  | 5  | 199 |
| chr7:157612037-157612316  | chr7  | 157612037 | 157612316 | 0.740968077 | 0.849095357 | -0.10812728  | 2  | 200 |
| chr14:107221093-107221298 | chr14 | 107221093 | 107221298 | 0.727423318 | 0.849295885 | -0.121872567 | 2  | 201 |
| chr1:37783612-37784258    | chr1  | 37783612  | 37784258  | 0.601655216 | 0.649386359 | -0.047731143 | 4  | 202 |
| chr4:57975861-57976916    | chr4  | 57975861  | 57976916  | 0.201570666 | 0.283743635 | -0.082172969 | 9  | 203 |
| chr19:49298406-49298745   | chr19 | 49298406  | 49298745  | 0.163922505 | 0.0953555   | 0.068567005  | 4  | 204 |
| chr16:1393574-1393878     | chr16 | 1393574   | 1393878   | 0.684970994 | 0.788328978 | -0.103357985 | 3  | 205 |
| chr22:45064160-45065092   | chr22 | 45064160  | 45065092  | 0.313691527 | 0.222285982 | 0.091405545  | 5  | 206 |
| chr7:5322681-5323193      | chr7  | 5322681   | 5323193   | 0.659192763 | 0.568201444 | 0.090991319  | 2  | 207 |
| chr4:169401351-169401725  | chr4  | 169401351 | 169401725 | 0.087335801 | 0.142109302 | -0.054773501 | 6  | 208 |
| chr20:10198136-10198984   | chr20 | 10198136  | 10198984  | 0.290967874 | 0.357805853 | -0.066837978 | 3  | 209 |
| chr19:48896891-48897199   | chr19 | 48896891  | 48897199  | 0.049576153 | 0.09334316  | -0.043767007 | 5  | 210 |
| chr3:39851026-39851820    | chr3  | 39851026  | 39851820  | 0.130767778 | 0.206370395 | -0.075602617 | 4  | 211 |
| chr16:31580560-31581023   | chr16 | 31580560  | 31581023  | 0.637491758 | 0.580281373 | 0.057210384  | 5  | 212 |
| chr11:2154034-2154387     | chr11 | 2154034   | 2154387   | 0.693468067 | 0.634679474 | 0.058788593  | 5  | 213 |
| chr1:149605515-149605903  | chr1  | 149605515 | 149605903 | 0.239121685 | 0.350729923 | -0.111608239 | 1  | 214 |
| chr18:76693918-76694195   | chr18 | 76693918  | 76694195  | 0.757706316 | 0.844440047 | -0.086733731 | 3  | 215 |
| chr20:53091734-53092993   | chr20 | 53091734  | 53092993  | 0.309919479 | 0.250505346 | 0.059414133  | 10 | 216 |

|                           |       |           |           |             |             |              |    |     |
|---------------------------|-------|-----------|-----------|-------------|-------------|--------------|----|-----|
| chr7:63498113-63498314    | chr7  | 63498113  | 63498314  | 0.403830631 | 0.447074435 | -0.043243804 | 4  | 217 |
| chr10:133318029-133318324 | chr10 | 133318029 | 133318324 | 0.53429014  | 0.606439666 | -0.072149527 | 3  | 218 |
| chr2:79220193-79220592    | chr2  | 79220193  | 79220592  | 0.472360002 | 0.534480277 | -0.062120275 | 4  | 219 |
| chr2:162270889-162271413  | chr2  | 162270889 | 162271413 | 0.228046188 | 0.287358349 | -0.059312161 | 3  | 220 |
| chr14:92979727-92981228   | chr14 | 92979727  | 92981228  | 0.404452546 | 0.447575737 | -0.043123191 | 8  | 221 |
| chr12:128899814-128900065 | chr12 | 128899814 | 128900065 | 0.560954392 | 0.486651561 | 0.074302831  | 3  | 222 |
| chr20:61937483-61937738   | chr20 | 61937483  | 61937738  | 0.766719232 | 0.888534941 | -0.121815709 | 2  | 223 |
| chr2:45161428-45163058    | chr2  | 45161428  | 45163058  | 0.699201659 | 0.628515741 | 0.070685918  | 5  | 224 |
| chr3:26664105-26664796    | chr3  | 26664105  | 26664796  | 0.308625745 | 0.364232434 | -0.055606689 | 7  | 225 |
| chr12:13154089-13154866   | chr12 | 13154089  | 13154866  | 0.341074019 | 0.423120696 | -0.082046677 | 6  | 226 |
| chr19:58666024-58666833   | chr19 | 58666024  | 58666833  | 0.276134241 | 0.33436387  | -0.058229629 | 4  | 227 |
| chr2:85554135-85555414    | chr2  | 85554135  | 85555414  | 0.059777768 | 0.111688422 | -0.051910654 | 6  | 228 |
| chr4:170948487-170948908  | chr4  | 170948487 | 170948908 | 0.224952419 | 0.15228856  | 0.072663859  | 4  | 229 |
| chr19:55865825-55866324   | chr19 | 55865825  | 55866324  | 0.461052414 | 0.547565652 | -0.086513238 | 7  | 230 |
| chr1:7740144-7741117      | chr1  | 7740144   | 7741117   | 0.368587243 | 0.31578629  | 0.052800952  | 7  | 231 |
| chr9:71394794-71395492    | chr9  | 71394794  | 71395492  | 0.107691327 | 0.150027325 | -0.042335998 | 5  | 232 |
| chr12:76741910-76742286   | chr12 | 76741910  | 76742286  | 0.209914991 | 0.089946095 | 0.119968897  | 5  | 233 |
| chrX:152909014-152909214  | chrX  | 152909014 | 152909214 | 0.432842341 | 0.485460431 | -0.052618091 | 3  | 234 |
| chr19:54057415-54058254   | chr19 | 54057415  | 54058254  | 0.699213352 | 0.778246109 | -0.079032757 | 3  | 235 |
| chr11:3224525-3225077     | chr11 | 3224525   | 3225077   | 0.268583633 | 0.319686504 | -0.051102871 | 5  | 236 |
| chr3:123751655-123753199  | chr3  | 123751655 | 123753199 | 0.163514367 | 0.206969613 | -0.043455245 | 7  | 237 |
| chr10:13933483-13934184   | chr10 | 13933483  | 13934184  | 0.446689684 | 0.488664444 | -0.04197476  | 3  | 238 |
| chr3:184016578-184017416  | chr3  | 184016578 | 184017416 | 0.079612822 | 0.121579164 | -0.041966342 | 6  | 239 |
| chr18:67069934-67070171   | chr18 | 67069934  | 67070171  | 0.691347222 | 0.640499855 | 0.050847367  | 4  | 240 |
| chr11:13030331-13032584   | chr11 | 13030331  | 13032584  | 0.531694021 | 0.631349462 | -0.09965544  | 11 | 241 |
| chr1:5793558-5793784      | chr1  | 5793558   | 5793784   | 0.70178485  | 0.807298645 | -0.105513795 | 1  | 242 |
| chr17:72667196-72667710   | chr17 | 72667196  | 72667710  | 0.554975709 | 0.483960601 | 0.071015108  | 4  | 243 |
| chr11:8009048-8009251     | chr11 | 8009048   | 8009251   | 0.27724872  | 0.318904734 | -0.041656014 | 2  | 244 |
| chr16:84214836-84215036   | chr16 | 84214836  | 84215036  | 0.908902674 | 0.804726373 | 0.104176301  | 2  | 245 |
| chr20:59598844-59599305   | chr20 | 59598844  | 59599305  | 0.507830981 | 0.549604156 | -0.041773174 | 3  | 246 |
| chr19:46367372-46367808   | chr19 | 46367372  | 46367808  | 0.231541692 | 0.31501333  | -0.083471638 | 3  | 247 |
| chrY:14107138-14107480    | chrY  | 14107138  | 14107480  | 0.765878592 | 0.596333359 | 0.169545233  | 1  | 248 |
| chr13:102106166-102106488 | chr13 | 102106166 | 102106488 | 0.280285047 | 0.190449392 | 0.089835655  | 2  | 249 |
| chr16:34777875-34778144   | chr16 | 34777875  | 34778144  | 0.640769184 | 0.59691563  | 0.043853553  | 3  | 250 |
| chr22:22901387-22901698   | chr22 | 22901387  | 22901698  | 0.324846644 | 0.454627229 | -0.129780585 | 5  | 251 |
| chr18:59000684-59001692   | chr18 | 59000684  | 59001692  | 0.359592533 | 0.417527347 | -0.057934814 | 6  | 252 |
| chr12:131200510-131200726 | chr12 | 131200510 | 131200726 | 0.205733707 | 0.15093952  | 0.054794186  | 3  | 253 |
| chr20:61147458-61147787   | chr20 | 61147458  | 61147787  | 0.678448343 | 0.612454917 | 0.065993426  | 6  | 254 |
| chr13:28540357-28541279   | chr13 | 28540357  | 28541279  | 0.587370081 | 0.690818858 | -0.103448777 | 2  | 255 |
| chr16:5289583-5290386     | chr16 | 5289583   | 5290386   | 0.474432793 | 0.544013002 | -0.069580209 | 1  | 256 |
| chr19:12476050-12476372   | chr19 | 12476050  | 12476372  | 0.29020586  | 0.374740499 | -0.084534639 | 3  | 257 |
| chr19:22805801-22806721   | chr19 | 22805801  | 22806721  | 0.627463339 | 0.671301779 | -0.04383844  | 5  | 258 |
| chr19:50762343-50762552   | chr19 | 50762343  | 50762552  | 0.845577782 | 0.755312858 | 0.090264924  | 2  | 259 |
| chr8:97657175-97657943    | chr8  | 97657175  | 97657943  | 0.242506419 | 0.295110542 | -0.052604123 | 12 | 260 |
| chr20:58507756-58509517   | chr20 | 58507756  | 58509517  | 0.657330459 | 0.697719158 | -0.040388699 | 8  | 261 |
| chr8:56013657-56015761    | chr8  | 56013657  | 56015761  | 0.249499232 | 0.209255389 | 0.040243843  | 7  | 262 |
| chr2:70485232-70485679    | chr2  | 70485232  | 70485679  | 0.091531309 | 0.131762803 | -0.040231494 | 3  | 263 |
| chr20:33814546-33815131   | chr20 | 33814546  | 33815131  | 0.296722003 | 0.339843758 | -0.043121755 | 1  | 264 |
| chr22:30116082-30117160   | chr22 | 30116082  | 30117160  | 0.407350699 | 0.366626822 | 0.040723877  | 8  | 265 |
| chr6:36410434-36411139    | chr6  | 36410434  | 36411139  | 0.045180325 | 0.085279927 | -0.040099602 | 12 | 266 |
| chr18:76150399-76151531   | chr18 | 76150399  | 76151531  | 0.67940361  | 0.78097817  | -0.10157456  | 2  | 267 |
| chr14:36977519-36977996   | chr14 | 36977519  | 36977996  | 0.420785667 | 0.475185753 | -0.054400087 | 4  | 268 |
| chr16:1480845-1481045     | chr16 | 1480845   | 1481045   | 0.608877759 | 0.529772649 | 0.079105111  | 3  | 269 |
| chr2:139537693-139538650  | chr2  | 139537693 | 139538650 | 0.386416764 | 0.426324776 | -0.039908013 | 7  | 270 |
| chr20:54824313-54824584   | chr20 | 54824313  | 54824584  | 0.639341173 | 0.693815901 | -0.054474728 | 3  | 271 |
| chr7:143058918-143060156  | chr7  | 143058918 | 143060156 | 0.225354644 | 0.2651155   | -0.039760856 | 12 | 272 |
| chr6:13873766-13874262    | chr6  | 13873766  | 13874262  | 0.599314334 | 0.528079072 | 0.071235262  | 4  | 273 |
| chr18:56934834-56936827   | chr18 | 56934834  | 56936827  | 0.64395331  | 0.705018592 | -0.061065282 | 7  | 274 |
| chr16:67464389-67465462   | chr16 | 67464389  | 67465462  | 0.173199412 | 0.133564783 | 0.039634629  | 9  | 275 |
| chr1:23945942-23946295    | chr1  | 23945942  | 23946295  | 0.047672015 | 0.087256505 | -0.03958449  | 3  | 276 |
| chr4:190959045-190960011  | chr4  | 190959045 | 190960011 | 0.386922691 | 0.438802315 | -0.051879624 | 3  | 277 |
| chr16:21294981-21295414   | chr16 | 21294981  | 21295414  | 0.139921906 | 0.240434659 | -0.100512752 | 2  | 278 |
| chr16:85269193-85269464   | chr16 | 85269193  | 85269464  | 0.677643048 | 0.594205065 | 0.083437983  | 1  | 279 |
| chrX:144902966-144903167  | chrX  | 144902966 | 144903167 | 0.345155761 | 0.384583379 | -0.039427618 | 3  | 280 |
| chr4:21950086-21950346    | chr4  | 21950086  | 21950346  | 0.12937284  | 0.204001164 | -0.074628324 | 3  | 281 |
| chr22:48605158-48605507   | chr22 | 48605158  | 48605507  | 0.738394082 | 0.655159009 | 0.083235074  | 3  | 282 |
| chr3:156008992-156009320  | chr3  | 156008992 | 156009320 | 0.536770326 | 0.594634848 | -0.057864521 | 3  | 283 |
| chr19:49559223-49560497   | chr19 | 49559223  | 49560497  | 0.307967155 | 0.353320708 | -0.045353553 | 4  | 284 |
| chrX:31284505-31285019    | chrX  | 31284505  | 31285019  | 0.478002823 | 0.563228841 | -0.085226018 | 4  | 285 |
| chr17:77715571-77716061   | chr17 | 77715571  | 77716061  | 0.264834696 | 0.328276385 | -0.063441689 | 3  | 286 |
| chrX:152912492-152913719  | chrX  | 152912492 | 152913719 | 0.554486869 | 0.605449782 | -0.050962913 | 5  | 287 |
| chr15:20148694-20150115   | chr15 | 20148694  | 20150115  | 0.702455396 | 0.618704525 | 0.083750871  | 3  | 288 |
| chrX:2825439-2825646      | chrX  | 2825439   | 2825646   | 0.744878394 | 0.842696182 | -0.097817788 | 2  | 289 |

|                           |       |           |           |             |             |              |    |     |
|---------------------------|-------|-----------|-----------|-------------|-------------|--------------|----|-----|
| chr20:57414596-57414896   | chr20 | 57414596  | 57414896  | 0.406402683 | 0.516694468 | -0.110291786 | 2  | 290 |
| chr5:127871959-127872263  | chr5  | 127871959 | 127872263 | 0.806711289 | 0.916096213 | -0.109384924 | 3  | 291 |
| chr13:113540351-113540558 | chr13 | 113540351 | 113540558 | 0.496485109 | 0.576535828 | -0.080050719 | 4  | 292 |
| chr13:53424942-53425995   | chr13 | 53424942  | 53425995  | 0.762207658 | 0.69522472  | 0.066982938  | 5  | 293 |
| chr5:55776605-55777233    | chr5  | 55776605  | 55777233  | 0.040575017 | 0.0792171   | -0.038642083 | 3  | 294 |
| chr10:57388069-57388528   | chr10 | 57388069  | 57388528  | 0.33118679  | 0.377625254 | -0.046438464 | 4  | 295 |
| chr19:6822268-6822604     | chr19 | 6822268   | 6822604   | 0.828653316 | 0.935888463 | -0.107235147 | 2  | 296 |
| chr4:185089688-185089989  | chr4  | 185089688 | 185089989 | 0.17788305  | 0.121185629 | 0.056697421  | 3  | 297 |
| chrX:39949373-39949976    | chrX  | 39949373  | 39949976  | 0.515588965 | 0.409894202 | 0.105694763  | 2  | 298 |
| chr1:17287291-17287684    | chr1  | 17287291  | 17287684  | 0.213709516 | 0.252053002 | -0.038343487 | 3  | 299 |
| chrX:3760664-3762210      | chrX  | 3760664   | 3762210   | 0.450414676 | 0.397995845 | 0.052418831  | 2  | 300 |
| chr8:132052204-132054749  | chr8  | 132052204 | 132054749 | 0.481743239 | 0.425159239 | 0.056584     | 13 | 301 |
| chr19:4607080-4607350     | chr19 | 4607080   | 4607350   | 0.664322799 | 0.600097212 | 0.064225587  | 4  | 302 |
| chr16:1047495-1048070     | chr16 | 1047495   | 1048070   | 0.527567577 | 0.479700508 | 0.047867069  | 3  | 303 |
| chr18:75611919-75612142   | chr18 | 75611919  | 75612142  | 0.145294544 | 0.078013498 | 0.067281046  | 2  | 304 |
| chr8:131455249-131456285  | chr8  | 131455249 | 131456285 | 0.163854556 | 0.201762635 | -0.037908079 | 6  | 305 |
| chr2:219773547-219774103  | chr2  | 219773547 | 219774103 | 0.346754248 | 0.292426694 | 0.054327555  | 5  | 306 |
| chr5:101632050-101632373  | chr5  | 101632050 | 101632373 | 0.158952302 | 0.109300728 | 0.049651574  | 9  | 307 |
| chrX:36975506-36976349    | chrX  | 36975506  | 36976349  | 0.527266645 | 0.603387952 | -0.076121307 | 4  | 308 |
| chr1:54965024-54965391    | chr1  | 54965024  | 54965391  | 0.314038123 | 0.351845178 | -0.037807055 | 3  | 309 |
| chr22:20790639-20792665   | chr22 | 20790639  | 20792665  | 0.195112866 | 0.261607206 | -0.06649434  | 16 | 310 |
| chr17:27949430-27950277   | chr17 | 27949430  | 27950277  | 0.12820826  | 0.165991813 | -0.037783554 | 3  | 311 |
| chr5:2007316-2007879      | chr5  | 2007316   | 2007879   | 0.620537102 | 0.69338499  | -0.072847888 | 3  | 312 |
| chr9:114937021-114937824  | chr9  | 114937021 | 114937824 | 0.146737695 | 0.199229416 | -0.052491721 | 4  | 313 |
| chr10:118927022-118928132 | chr10 | 118927022 | 118928132 | 0.7116284   | 0.636355755 | 0.075272645  | 5  | 314 |
| chr3:98376317-98376542    | chr3  | 98376317  | 98376542  | 0.072469006 | 0.110076445 | -0.037607439 | 3  | 315 |
| chr12:103350090-103350422 | chr12 | 103350090 | 103350422 | 0.441059442 | 0.370676364 | 0.070383078  | 2  | 316 |
| chr20:34652455-34653500   | chr20 | 34652455  | 34653500  | 0.377248889 | 0.414603303 | -0.037354415 | 4  | 317 |
| chr9:130374109-130374885  | chr9  | 130374109 | 130374885 | 0.300879496 | 0.379118857 | -0.078239361 | 2  | 318 |
| chr8:49427075-49427416    | chr8  | 49427075  | 49427416  | 0.052446851 | 0.089608404 | -0.037161553 | 2  | 319 |
| chr7:121943868-121944538  | chr7  | 121943868 | 121944538 | 0.275117708 | 0.330646688 | -0.05552898  | 5  | 320 |
| chr22:50982571-50982994   | chr22 | 50982571  | 50982994  | 0.618115587 | 0.698364619 | -0.080249032 | 2  | 321 |
| chrX:7895078-7895608      | chrX  | 7895078   | 7895608   | 0.405110929 | 0.307046025 | 0.098064904  | 9  | 322 |
| chr10:102778605-102778922 | chr10 | 102778605 | 102778922 | 0.324372011 | 0.361482578 | -0.037110566 | 4  | 323 |
| chr9:29826527-29826736    | chr9  | 29826527  | 29826736  | 0.605175118 | 0.67490027  | -0.069725152 | 2  | 324 |
| chr1:181287301-181287873  | chr1  | 181287301 | 181287873 | 0.282488398 | 0.24546074  | 0.037027658  | 6  | 325 |
| chrX:117629131-117629377  | chrX  | 117629131 | 117629377 | 0.620700286 | 0.681412301 | -0.060712015 | 4  | 326 |
| chrX:106959379-106959914  | chrX  | 106959379 | 106959914 | 0.393985086 | 0.445994985 | -0.052009899 | 4  | 327 |
| chrX:103173143-103173967  | chrX  | 103173143 | 103173967 | 0.333691731 | 0.396247878 | -0.062556147 | 3  | 328 |
| chr12:34488611-34489037   | chr12 | 34488611  | 34489037  | 0.484202581 | 0.553548277 | -0.069345696 | 3  | 329 |
| chr9:69065082-69065964    | chr9  | 69065082  | 69065964  | 0.422492824 | 0.476505169 | -0.054012345 | 1  | 330 |
| chr19:35633848-35634629   | chr19 | 35633848  | 35634629  | 0.269575173 | 0.318742444 | -0.049167271 | 5  | 331 |
| chr19:10627981-10628417   | chr19 | 10627981  | 10628417  | 0.061442559 | 0.105423224 | -0.043980665 | 2  | 332 |
| chr3:26665951-26666164    | chr3  | 26665951  | 26666164  | 0.479974518 | 0.535635815 | -0.055661297 | 2  | 333 |
| chr16:633868-634143       | chr16 | 633868    | 634143    | 0.732591188 | 0.825746498 | -0.09315531  | 2  | 334 |
| chr7:65878464-65878977    | chr7  | 65878464  | 65878977  | 0.538845262 | 0.467584493 | 0.071260769  | 4  | 335 |
| chr10:37940423-37940674   | chr10 | 37940423  | 37940674  | 0.810937671 | 0.755854748 | 0.055082923  | 3  | 336 |
| chr2:176952696-176953297  | chr2  | 176952696 | 176953297 | 0.706433852 | 0.770575928 | -0.064142076 | 5  | 337 |
| chrX:134655875-134656127  | chrX  | 134655875 | 134656127 | 0.385273532 | 0.424866095 | -0.039592563 | 3  | 338 |
| chr8:81805956-81806327    | chr8  | 81805956  | 81806327  | 0.295116877 | 0.331711191 | -0.036595032 | 4  | 339 |
| chr5:172665307-172666072  | chr5  | 172665307 | 172666072 | 0.189129816 | 0.238817887 | -0.049688071 | 4  | 340 |
| chr8:40755165-40755404    | chr8  | 40755165  | 40755404  | 0.262868886 | 0.214462132 | 0.048406754  | 4  | 341 |
| chr22:17083385-17083628   | chr22 | 17083385  | 17083628  | 0.432843433 | 0.497798066 | -0.064954633 | 3  | 342 |
| chr11:120039602-120040210 | chr11 | 120039602 | 120040210 | 0.289684206 | 0.326164396 | -0.036480189 | 5  | 343 |
| chr8:15094238-15095168    | chr8  | 15094238  | 15095168  | 0.210535904 | 0.247001524 | -0.036465621 | 3  | 344 |
| chr3:40518518-40518848    | chr3  | 40518518  | 40518848  | 0.118666293 | 0.186597408 | -0.067931115 | 5  | 345 |
| chrX:67718428-67719071    | chrX  | 67718428  | 67719071  | 0.475756747 | 0.527622607 | -0.05186586  | 10 | 346 |
| chr17:38255275-38255896   | chr17 | 38255275  | 38255896  | 0.374701292 | 0.307531126 | 0.067170166  | 4  | 347 |
| chr8:57232371-57232795    | chr8  | 57232371  | 57232795  | 0.656856242 | 0.724444052 | -0.06758781  | 4  | 348 |
| chr16:34407637-34407919   | chr16 | 34407637  | 34407919  | 0.609801639 | 0.550155768 | 0.059645871  | 4  | 349 |
| chr4:55094322-55094593    | chr4  | 55094322  | 55094593  | 0.237562454 | 0.276934178 | -0.039371725 | 3  | 350 |
| chr2:210073774-210074294  | chr2  | 210073774 | 210074294 | 0.782276748 | 0.869121629 | -0.08684488  | 2  | 351 |
| chr19:1324970-1325349     | chr19 | 1324970   | 1325349   | 0.138565788 | 0.216467109 | -0.077901321 | 3  | 352 |
| chr21:15052411-15052644   | chr21 | 15052411  | 15052644  | 0.709981317 | 0.632640891 | 0.077340426  | 1  | 353 |
| chrX:132547568-132550284  | chrX  | 132547568 | 132550284 | 0.389810953 | 0.435323052 | -0.045512098 | 10 | 354 |
| chr8:85096760-85097247    | chr8  | 85096760  | 85097247  | 0.302741871 | 0.338620468 | -0.035878597 | 8  | 355 |
| chr19:22700397-22701261   | chr19 | 22700397  | 22701261  | 0.575605804 | 0.637817127 | -0.062211323 | 3  | 356 |
| chr9:38392510-38393187    | chr9  | 38392510  | 38393187  | 0.169778694 | 0.110961506 | 0.058817188  | 4  | 357 |
| chr14:65438413-65439363   | chr14 | 65438413  | 65439363  | 0.182944472 | 0.21873376  | -0.035789287 | 8  | 358 |
| chr10:711897-712395       | chr10 | 711897    | 712395    | 0.486728054 | 0.547172551 | -0.060444497 | 6  | 359 |
| chr12:48577362-48578574   | chr12 | 48577362  | 48578574  | 0.517246969 | 0.478163231 | 0.039083738  | 6  | 360 |
| chrX:125714891-125715321  | chrX  | 125714891 | 125715321 | 0.673654236 | 0.630647215 | 0.043007022  | 2  | 361 |
| chr5:43000344-43000791    | chr5  | 43000344  | 43000791  | 0.714763345 | 0.799220772 | -0.084457428 | 4  | 362 |

|                           |       |           |           |             |             |              |    |     |
|---------------------------|-------|-----------|-----------|-------------|-------------|--------------|----|-----|
| chrX:105855029-105855297  | chrX  | 105855029 | 105855297 | 0.452462945 | 0.504623383 | -0.052160438 | 8  | 363 |
| chr12:121022420-121022704 | chr12 | 121022420 | 121022704 | 0.14246925  | 0.196084156 | -0.053614906 | 3  | 364 |
| chr2:80529678-80530846    | chr2  | 80529678  | 80530846  | 0.285017868 | 0.201576286 | 0.083441582  | 5  | 365 |
| chr17:29814615-29815662   | chr17 | 29814615  | 29815662  | 0.15430298  | 0.189820941 | -0.035517961 | 2  | 366 |
| chr19:54040813-54041857   | chr19 | 54040813  | 54041857  | 0.461173608 | 0.508548916 | -0.047375307 | 9  | 367 |
| chr17:39705046-39705332   | chr17 | 39705046  | 39705332  | 0.249393659 | 0.284840956 | -0.035447297 | 4  | 368 |
| chr17:42015844-42016069   | chr17 | 42015844  | 42016069  | 0.657316074 | 0.59906907  | 0.058247005  | 2  | 369 |
| chr17:40558006-40558274   | chr17 | 40558006  | 40558274  | 0.593341311 | 0.628731749 | -0.035390438 | 3  | 370 |
| chr10:3598476-3598930     | chr10 | 3598476   | 3598930   | 0.582598139 | 0.656113742 | -0.073515604 | 2  | 371 |
| chr2:155554006-155556069  | chr2  | 155554006 | 155556069 | 0.406160576 | 0.369613115 | 0.036547461  | 12 | 372 |
| chr3:172167527-172167866  | chr3  | 172167527 | 172167866 | 0.690271563 | 0.761933475 | -0.071661912 | 4  | 373 |
| chr17:9018997-9019207     | chr17 | 9018997   | 9019207   | 0.096333001 | 0.13154026  | -0.035207259 | 3  | 374 |
| chr9:95896008-95897016    | chr9  | 95896008  | 95897016  | 0.290154205 | 0.25424707  | 0.035907134  | 5  | 375 |
| chr2:112895793-112897841  | chr2  | 112895793 | 112897841 | 0.331309617 | 0.411409525 | -0.080099908 | 4  | 376 |
| chr7:62809610-62809812    | chr7  | 62809610  | 62809812  | 0.721648188 | 0.645275145 | 0.076373043  | 1  | 377 |
| chr7:157937615-157937841  | chr7  | 157937615 | 157937841 | 0.462883861 | 0.517959937 | -0.055076076 | 1  | 378 |
| chr2:24300061-24300294    | chr2  | 24300061  | 24300294  | 0.150433382 | 0.102888795 | 0.047544587  | 3  | 379 |
| chr12:102036254-102036461 | chr12 | 102036254 | 102036461 | 0.570340607 | 0.638957471 | -0.068616864 | 3  | 380 |
| chr9:127240132-127240456  | chr9  | 127240132 | 127240456 | 0.333754982 | 0.375833615 | -0.042078634 | 2  | 381 |
| chr8:117950473-117950717  | chr8  | 117950473 | 117950717 | 0.373144361 | 0.483931839 | -0.110787477 | 2  | 382 |
| chr17:19483306-19483687   | chr17 | 19483306  | 19483687  | 0.852472102 | 0.764787702 | 0.087684399  | 4  | 383 |
| chr10:42971196-42971834   | chr10 | 42971196  | 42971834  | 0.38587795  | 0.350922052 | 0.034955898  | 4  | 384 |
| chr11:68451360-68452846   | chr11 | 68451360  | 68452846  | 0.790290924 | 0.699856839 | 0.090434085  | 10 | 385 |
| chr16:28303974-28304770   | chr16 | 28303974  | 28304770  | 0.159541958 | 0.194461327 | -0.034919369 | 3  | 386 |
| chr1:149514272-149514592  | chr1  | 149514272 | 149514592 | 0.288461704 | 0.253546444 | 0.03491526   | 2  | 387 |
| chr3:68980784-68982035    | chr3  | 68980784  | 68982035  | 0.24883274  | 0.283719028 | -0.034886289 | 10 | 388 |
| chr19:54494609-54494816   | chr19 | 54494609  | 54494816  | 0.160926778 | 0.195800489 | -0.03487371  | 2  | 389 |
| chr3:11034447-11035384    | chr3  | 11034447  | 11035384  | 0.390848869 | 0.435645186 | -0.044796317 | 6  | 390 |
| chr9:139734846-139735085  | chr9  | 139734846 | 139735085 | 0.822851427 | 0.737144328 | 0.085707099  | 1  | 391 |
| chr22:18957996-18958721   | chr22 | 18957996  | 18958721  | 0.082261777 | 0.11700959  | -0.034747813 | 3  | 392 |
| chrX:82765443-82765776    | chrX  | 82765443  | 82765776  | 0.712171423 | 0.648077518 | 0.064093905  | 3  | 393 |
| chr20:32307818-32308120   | chr20 | 32307818  | 32308120  | 0.393257871 | 0.536231452 | -0.142973581 | 4  | 394 |
| chr14:103557607-103558235 | chr14 | 103557607 | 103558235 | 0.430755547 | 0.396145234 | 0.034610314  | 4  | 395 |
| chr22:43547320-43548169   | chr22 | 43547320  | 43548169  | 0.407360363 | 0.463276602 | -0.055916239 | 7  | 396 |
| chr15:23157795-23158624   | chr15 | 23157795  | 23158624  | 0.506340437 | 0.559787061 | -0.053446624 | 3  | 397 |
| chr12:54412991-54413346   | chr12 | 54412991  | 54413346  | 0.077073131 | 0.127796318 | -0.050723187 | 3  | 398 |
| chrX:54834762-54835010    | chrX  | 54834762  | 54835010  | 0.460905366 | 0.495945892 | -0.035040526 | 2  | 399 |
| chr1:236304759-236305025  | chr1  | 236304759 | 236305025 | 0.519052019 | 0.464816437 | 0.054235582  | 4  | 400 |
| chr19:52873085-52873572   | chr19 | 52873085  | 52873572  | 0.277221626 | 0.185499113 | 0.091722513  | 7  | 401 |
| chr15:69591247-69591754   | chr15 | 69591247  | 69591754  | 0.03848336  | 0.072842008 | -0.034358649 | 4  | 402 |
| chr2:74881360-74882019    | chr2  | 74881360  | 74882019  | 0.238276985 | 0.186329486 | 0.051947499  | 4  | 403 |
| chr17:78079569-78079833   | chr17 | 78079569  | 78079833  | 0.754300478 | 0.682851172 | 0.071449305  | 5  | 404 |
| chrX:136651179-136651656  | chrX  | 136651179 | 136651656 | 0.38239284  | 0.41662567  | -0.03423283  | 5  | 405 |
| chr3:42922220-42922872    | chr3  | 42922220  | 42922872  | 0.178393282 | 0.120302738 | 0.058090544  | 4  | 406 |
| chr16:86528272-86529013   | chr16 | 86528272  | 86529013  | 0.827843713 | 0.751644145 | 0.076199568  | 5  | 407 |
| chr19:58070554-58071273   | chr19 | 58070554  | 58071273  | 0.067244261 | 0.104531253 | -0.037286991 | 4  | 408 |
| chr22:26565200-26565986   | chr22 | 26565200  | 26565986  | 0.156399467 | 0.190547763 | -0.034148296 | 2  | 409 |
| chr16:1429051-1430104     | chr16 | 1429051   | 1430104   | 0.176582471 | 0.219715695 | -0.043133224 | 8  | 410 |
| chr19:58555799-58556614   | chr19 | 58555799  | 58556614  | 0.822288864 | 0.751171136 | 0.071117728  | 4  | 411 |
| chr4:3748225-3748581      | chr4  | 3748225   | 3748581   | 0.117889363 | 0.179487771 | -0.061598408 | 3  | 412 |
| chr7:27162088-27162426    | chr7  | 27162088  | 27162426  | 0.797755751 | 0.887339922 | -0.089584171 | 3  | 413 |
| chr12:63025589-63026213   | chr12 | 63025589  | 63026213  | 0.1137908   | 0.151098129 | -0.037307329 | 5  | 414 |
| chr15:74218697-74220373   | chr15 | 74218697  | 74220373  | 0.30610877  | 0.345950784 | -0.039842014 | 16 | 415 |
| chr22:46545481-46547412   | chr22 | 46545481  | 46547412  | 0.153117113 | 0.186957705 | -0.033840592 | 4  | 416 |
| chrX:113816090-113816409  | chrX  | 113816090 | 113816409 | 0.510244634 | 0.46298582  | 0.047258814  | 4  | 417 |
| chr10:134843466-134843776 | chr10 | 134843466 | 134843776 | 0.837834916 | 0.7597561   | 0.078078816  | 2  | 418 |
| chr5:2180252-2180467      | chr5  | 2180252   | 2180467   | 0.755815748 | 0.840607406 | -0.084791658 | 2  | 419 |
| chr2:191399090-191399742  | chr2  | 191399090 | 191399742 | 0.192250623 | 0.282623755 | -0.090373132 | 3  | 420 |
| chr19:12163327-12163560   | chr19 | 12163327  | 12163560  | 0.200602023 | 0.1669401   | 0.033661924  | 1  | 421 |
| chr10:63212496-63213009   | chr10 | 63212496  | 63213009  | 0.538151432 | 0.489600415 | 0.048551016  | 3  | 422 |
| chr2:128165849-128166198  | chr2  | 128165849 | 128166198 | 0.138468539 | 0.189591651 | -0.051123113 | 4  | 423 |
| chr1:33005424-33005739    | chr1  | 33005424  | 33005739  | 0.086887505 | 0.053330453 | 0.033557053  | 2  | 424 |
| chr17:7893331-7893702     | chr17 | 7893331   | 7893702   | 0.103081481 | 0.136632113 | -0.033550631 | 4  | 425 |
| chr19:41857248-41857586   | chr19 | 41857248  | 41857586  | 0.093504179 | 0.135497588 | -0.04199341  | 3  | 426 |
| chr11:98891544-98891821   | chr11 | 98891544  | 98891821  | 0.157213496 | 0.190706399 | -0.033492903 | 8  | 427 |
| chr7:148787422-148788601  | chr7  | 148787422 | 148788601 | 0.095259088 | 0.12868436  | -0.033425272 | 6  | 428 |
| chr18:14178944-14179710   | chr18 | 14178944  | 14179710  | 0.325235239 | 0.358640666 | -0.033405427 | 3  | 429 |
| chrX:118708294-118709240  | chrX  | 118708294 | 118709240 | 0.51504432  | 0.569303896 | -0.054259576 | 11 | 430 |
| chr16:55357522-55359040   | chr16 | 55357522  | 55359040  | 0.138413631 | 0.174831673 | -0.036418042 | 7  | 431 |
| chr20:33865334-33865563   | chr20 | 33865334  | 33865563  | 0.08979777  | 0.123164648 | -0.033366879 | 2  | 432 |
| chr19:2428350-2428731     | chr19 | 2428350   | 2428731   | 0.697547142 | 0.776276524 | -0.078729382 | 4  | 433 |
| chr3:196755678-196757374  | chr3  | 196755678 | 196757374 | 0.389403194 | 0.441540528 | -0.052137334 | 6  | 434 |
| chr16:25702956-25704631   | chr16 | 25702956  | 25704631  | 0.364273291 | 0.328755962 | 0.03551733   | 9  | 435 |



|                           |       |           |           |             |             |              |    |     |
|---------------------------|-------|-----------|-----------|-------------|-------------|--------------|----|-----|
| chr10:133449493-133449716 | chr10 | 133449493 | 133449716 | 0.669627721 | 0.728151256 | -0.058523535 | 4  | 436 |
| chr2:51254523-51255498    | chr2  | 51254523  | 51255498  | 0.78315637  | 0.863343692 | -0.080187322 | 4  | 437 |
| chr10:130339527-130339777 | chr10 | 130339527 | 130339777 | 0.6926802   | 0.768367089 | -0.075686889 | 5  | 438 |
| chr1:88928284-88928760    | chr1  | 88928284  | 88928760  | 0.349833923 | 0.394803562 | -0.044969639 | 4  | 439 |
| chr11:113906921-113907332 | chr11 | 113906921 | 113907332 | 0.07857456  | 0.11296653  | -0.03439197  | 3  | 440 |
| chr18:77309696-77312226   | chr18 | 77309696  | 77312226  | 0.72114492  | 0.799212598 | -0.078067678 | 1  | 441 |
| chr3:184243086-184243328  | chr3  | 184243086 | 184243328 | 0.626773982 | 0.567881441 | 0.05889254   | 3  | 442 |
| chr7:157455790-157456044  | chr7  | 157455790 | 157456044 | 0.874463948 | 0.792945301 | 0.081518647  | 3  | 443 |
| chr20:690576-691099       | chr20 | 690576    | 691099    | 0.459973653 | 0.512446895 | -0.052473243 | 3  | 444 |
| chr1:10057122-10058108    | chr1  | 10057122  | 10058108  | 0.5325367   | 0.580391926 | -0.047855227 | 8  | 445 |
| chr2:16689509-16689822    | chr2  | 16689509  | 16689822  | 0.238360851 | 0.32748139  | -0.089120539 | 2  | 446 |
| chr1:196577709-196578011  | chr1  | 196577709 | 196578011 | 0.29846011  | 0.228430504 | 0.070029606  | 3  | 447 |
| chr5:76115511-76116089    | chr5  | 76115511  | 76116089  | 0.097410383 | 0.130463238 | -0.033052854 | 5  | 448 |
| chr12:48153330-48153551   | chr12 | 48153330  | 48153551  | 0.136542192 | 0.10351642  | 0.033025772  | 2  | 449 |
| chr5:140736822-140737058  | chr5  | 140736822 | 140737058 | 0.702399057 | 0.642113458 | 0.060285599  | 3  | 450 |
| chr19:6590341-6591072     | chr19 | 6590341   | 6591072   | 0.516485415 | 0.598266971 | -0.081781556 | 3  | 451 |
| chr18:6920592-6920874     | chr18 | 6920592   | 6920874   | 0.844594197 | 0.917801238 | -0.073207041 | 3  | 452 |
| chr2:99552186-99553831    | chr2  | 99552186  | 99553831  | 0.394722628 | 0.427644168 | -0.03292154  | 11 | 453 |
| chr4:11430236-11431256    | chr4  | 11430236  | 11431256  | 0.321453508 | 0.280230662 | 0.041222846  | 10 | 454 |
| chr9:66343504-66343760    | chr9  | 66343504  | 66343760  | 0.661741033 | 0.597937399 | 0.063803634  | 1  | 455 |
| chr19:3982825-3983190     | chr19 | 3982825   | 3983190   | 0.778733353 | 0.850324465 | -0.071591112 | 4  | 456 |
| chr19:29218002-29218733   | chr19 | 29218002  | 29218733  | 0.333747764 | 0.376000343 | -0.042252579 | 5  | 457 |
| chr3:158519510-158520329  | chr3  | 158519510 | 158520329 | 0.182128182 | 0.215574734 | -0.033446552 | 9  | 458 |
| chr17:47979466-47979740   | chr17 | 47979466  | 47979740  | 0.24853076  | 0.198309502 | 0.050221259  | 3  | 459 |
| chr22:25816913-25817539   | chr22 | 25816913  | 25817539  | 0.595279874 | 0.659506423 | -0.064226549 | 3  | 460 |
| chr11:132813563-132814395 | chr11 | 132813563 | 132814395 | 0.282785923 | 0.315385568 | -0.032599645 | 4  | 461 |
| chr4:113626740-113627507  | chr4  | 113626740 | 113627507 | 0.320370576 | 0.355812546 | -0.03544197  | 4  | 462 |
| chr6:30523287-30523519    | chr6  | 30523287  | 30523519  | 0.254962342 | 0.217186124 | 0.037776217  | 9  | 463 |
| chr21:38362016-38362868   | chr21 | 38362016  | 38362868  | 0.296910804 | 0.262008516 | 0.034902288  | 7  | 464 |
| chr22:29866327-29866652   | chr22 | 29866327  | 29866652  | 0.130229963 | 0.162712274 | -0.032482311 | 2  | 465 |
| chr18:76765748-76766833   | chr18 | 76765748  | 76766833  | 0.810110306 | 0.844170565 | -0.034060258 | 5  | 466 |
| chr9:131533780-131534695  | chr9  | 131533780 | 131534695 | 0.053936333 | 0.086390065 | -0.032453732 | 5  | 467 |
| chr11:64409878-64411253   | chr11 | 64409878  | 64411253  | 0.424493692 | 0.490599692 | -0.066105999 | 3  | 468 |
| chr9:115708029-115708238  | chr9  | 115708029 | 115708238 | 0.673851354 | 0.595880727 | 0.077970627  | 1  | 469 |
| chr19:1734222-1734627     | chr19 | 1734222   | 1734627   | 0.866452323 | 0.79731261  | 0.069139713  | 2  | 470 |
| chr1:2876546-2876808      | chr1  | 2876546   | 2876808   | 0.552836945 | 0.635936099 | -0.083099154 | 2  | 471 |
| chr5:134870741-134872051  | chr5  | 134870741 | 134872051 | 0.367887422 | 0.409530039 | -0.041642617 | 17 | 472 |
| chr9:112542132-112542667  | chr9  | 112542132 | 112542667 | 0.060752711 | 0.093003519 | -0.032250808 | 1  | 473 |
| chr8:1311388-1311626      | chr8  | 1311388   | 1311626   | 0.663042516 | 0.731038619 | -0.067996104 | 3  | 474 |
| chr5:2111837-2112484      | chr5  | 2111837   | 2112484   | 0.758921616 | 0.829930857 | -0.071009241 | 7  | 475 |
| chr12:30948549-30949757   | chr12 | 30948549  | 30949757  | 0.149414704 | 0.181565586 | -0.032150882 | 10 | 476 |
| chr16:31453944-31454561   | chr16 | 31453944  | 31454561  | 0.279924842 | 0.335812316 | -0.055887474 | 3  | 477 |
| chr7:948295-949168        | chr7  | 948295    | 949168    | 0.389289407 | 0.353540693 | 0.035748715  | 2  | 478 |
| chr1:13839506-13840613    | chr1  | 13839506  | 13840613  | 0.529282757 | 0.561190358 | -0.031907602 | 7  | 479 |
| chrX:134655103-134655750  | chrX  | 134655103 | 134655750 | 0.158892917 | 0.244385777 | -0.08549286  | 1  | 480 |
| chrX:148586553-148586984  | chrX  | 148586553 | 148586984 | 0.391809044 | 0.430126168 | -0.038317124 | 8  | 481 |
| chr9:108418404-108418934  | chr9  | 108418404 | 108418934 | 0.81691469  | 0.739350197 | 0.077564493  | 4  | 482 |
| chr11:59382688-59382929   | chr11 | 59382688  | 59382929  | 0.071380511 | 0.103141757 | -0.031761247 | 3  | 483 |
| chr16:71264361-71264659   | chr16 | 71264361  | 71264659  | 0.065891017 | 0.128125655 | -0.062234639 | 4  | 484 |
| chrX:153094110-153094620  | chrX  | 153094110 | 153094620 | 0.49608011  | 0.539983208 | -0.043903097 | 3  | 485 |
| chr7:140339998-140341136  | chr7  | 140339998 | 140341136 | 0.470343871 | 0.502359409 | -0.032015538 | 3  | 486 |
| chr2:158453800-158454111  | chr2  | 158453800 | 158454111 | 0.487468439 | 0.528826192 | -0.041357753 | 4  | 487 |
| chr16:30905550-30905783   | chr16 | 30905550  | 30905783  | 0.116507415 | 0.151247979 | -0.034740564 | 3  | 488 |
| chr2:242156852-242157835  | chr2  | 242156852 | 242157835 | 0.737184099 | 0.666727436 | 0.070456663  | 2  | 489 |
| chrX:63614958-63615423    | chrX  | 63614958  | 63615423  | 0.465982893 | 0.503907046 | -0.037924153 | 5  | 490 |
| chr1:39044060-39044561    | chr1  | 39044060  | 39044561  | 0.180064087 | 0.239891    | -0.059826914 | 5  | 491 |
| chr9:91605765-91606141    | chr9  | 91605765  | 91606141  | 0.84724516  | 0.773011003 | 0.074234156  | 2  | 492 |
| chr9:137997371-137997588  | chr9  | 137997371 | 137997588 | 0.864009622 | 0.786369698 | 0.077639924  | 2  | 493 |
| chr2:74781495-74782685    | chr2  | 74781495  | 74782685  | 0.652039929 | 0.570105603 | 0.081934326  | 4  | 494 |
| chrX:133507135-133507666  | chrX  | 133507135 | 133507666 | 0.382192897 | 0.419579833 | -0.037386937 | 6  | 495 |
| chr16:22959427-22959876   | chr16 | 22959427  | 22959876  | 0.843348117 | 0.773394815 | 0.069953302  | 5  | 496 |
| chr19:1725416-1726154     | chr19 | 1725416   | 1726154   | 0.199327628 | 0.230754179 | -0.031426552 | 5  | 497 |
| chr6:62995856-62996228    | chr6  | 62995856  | 62996228  | 0.320317567 | 0.280999468 | 0.0393181    | 8  | 498 |
| chr9:69147117-69148171    | chr9  | 69147117  | 69148171  | 0.629207718 | 0.672257816 | -0.043050097 | 2  | 499 |
| chr11:71952113-71952528   | chr11 | 71952113  | 71952528  | 0.800272334 | 0.709738966 | 0.090533369  | 3  | 500 |
| chr8:1105615-1106066      | chr8  | 1105615   | 1106066   | 0.808677279 | 0.881710498 | -0.073033219 | 3  | 501 |
| chr8:22457124-22457753    | chr8  | 22457124  | 22457753  | 0.225016594 | 0.278311323 | -0.053294729 | 3  | 502 |
| chrX:133371070-133371718  | chrX  | 133371070 | 133371718 | 0.336815643 | 0.3725965   | -0.035780857 | 5  | 503 |
| chr1:20692583-20693534    | chr1  | 20692583  | 20693534  | 0.564353915 | 0.624585212 | -0.060231297 | 5  | 504 |
| chr20:42875765-42876184   | chr20 | 42875765  | 42876184  | 0.233721478 | 0.272813833 | -0.039092355 | 6  | 505 |
| chr1:2144200-2144497      | chr1  | 2144200   | 2144497   | 0.16048266  | 0.12933367  | 0.03114899   | 1  | 506 |
| chr16:31830661-31831188   | chr16 | 31830661  | 31831188  | 0.780007047 | 0.815511124 | -0.035504076 | 4  | 507 |
| chr22:40060602-40061031   | chr22 | 40060602  | 40061031  | 0.53227024  | 0.484484733 | 0.047785506  | 3  | 508 |

|                           |       |           |           |             |             |              |    |     |
|---------------------------|-------|-----------|-----------|-------------|-------------|--------------|----|-----|
| chrX:10094051-10094406    | chrX  | 10094051  | 10094406  | 0.771345935 | 0.838643875 | -0.067297941 | 3  | 509 |
| chr10:118925272-118925529 | chr10 | 118925272 | 118925529 | 0.235263505 | 0.289538303 | -0.054274798 | 3  | 510 |
| chr2:73495921-73496910    | chr2  | 73495921  | 73496910  | 0.531529406 | 0.581905792 | -0.050376386 | 3  | 511 |
| chr19:10542663-10543120   | chr19 | 10542663  | 10543120  | 0.811757306 | 0.739935006 | 0.071822299  | 2  | 512 |
| chr5:160974693-160975384  | chr5  | 160974693 | 160975384 | 0.086124008 | 0.129417778 | -0.04329377  | 3  | 513 |
| chr18:34854248-34855163   | chr18 | 34854248  | 34855163  | 0.891224825 | 0.814738835 | 0.07648599   | 4  | 514 |
| chr1:202678882-202679769  | chr1  | 202678882 | 202679769 | 0.124084572 | 0.155152882 | -0.03106831  | 9  | 515 |
| chrX:66763685-66764077    | chrX  | 66763685  | 66764077  | 0.412234382 | 0.451543357 | -0.039308975 | 4  | 516 |
| chr11:66049751-66050229   | chr11 | 66049751  | 66050229  | 0.402752967 | 0.362111991 | 0.040640976  | 4  | 517 |
| chr13:92051154-92051716   | chr13 | 92051154  | 92051716  | 0.398359263 | 0.429309911 | -0.030950648 | 4  | 518 |
| chr10:42862954-42863216   | chr10 | 42862954  | 42863216  | 0.467442615 | 0.425319021 | 0.042123595  | 3  | 519 |
| chr2:207506775-207507422  | chr2  | 207506775 | 207507422 | 0.62392066  | 0.670078612 | -0.046157952 | 6  | 520 |
| chr10:44185040-44186132   | chr10 | 44185040  | 44186132  | 0.461084457 | 0.410880007 | 0.05020445   | 6  | 521 |
| chr15:44580805-44581543   | chr15 | 44580805  | 44581543  | 0.11767089  | 0.14844158  | -0.03077069  | 6  | 522 |
| chr2:71295161-71296002    | chr2  | 71295161  | 71296002  | 0.082144289 | 0.116126175 | -0.033981886 | 12 | 523 |
| chr11:129148498-129149917 | chr11 | 129148498 | 129149917 | 0.145852628 | 0.094448946 | 0.051403682  | 4  | 524 |
| chr16:56669038-56669727   | chr16 | 56669038  | 56669727  | 0.872659958 | 0.798633773 | 0.074026184  | 3  | 525 |
| chr22:16466478-16467159   | chr22 | 16466478  | 16467159  | 0.787889499 | 0.864095532 | -0.076206033 | 1  | 526 |
| chr14:75894309-75895469   | chr14 | 75894309  | 75895469  | 0.207494628 | 0.247017889 | -0.039523262 | 7  | 527 |
| chr16:1098523-1098875     | chr16 | 1098523   | 1098875   | 0.587760531 | 0.669725161 | -0.08196463  | 2  | 528 |
| chr15:55879793-55881228   | chr15 | 55879793  | 55881228  | 0.281621707 | 0.324970692 | -0.043348985 | 11 | 529 |
| chr12:132619198-132620960 | chr12 | 132619198 | 132620960 | 0.840914439 | 0.921960484 | -0.081046045 | 1  | 530 |
| chr3:119041383-119042255  | chr3  | 119041383 | 119042255 | 0.097760119 | 0.128359373 | -0.030599254 | 4  | 531 |
| chr18:76160174-76160444   | chr18 | 76160174  | 76160444  | 0.401023756 | 0.436158169 | -0.035134412 | 4  | 532 |
| chr12:131199825-131200157 | chr12 | 131199825 | 131200157 | 0.4931699   | 0.541025866 | -0.047855966 | 3  | 533 |
| chr16:32264532-32265444   | chr16 | 32264532  | 32265444  | 0.642954437 | 0.704916563 | -0.061962126 | 1  | 534 |
| chr1:156890244-156890806  | chr1  | 156890244 | 156890806 | 0.520928608 | 0.551388332 | -0.030459724 | 4  | 535 |
| chr1:99729983-99730335    | chr1  | 99729983  | 99730335  | 0.485184912 | 0.392356849 | 0.092828063  | 2  | 536 |
| chr21:44592720-44593643   | chr21 | 44592720  | 44593643  | 0.87052382  | 0.793588449 | 0.076935371  | 2  | 537 |
| chr17:42072139-42072444   | chr17 | 42072139  | 42072444  | 0.323847649 | 0.366565444 | -0.042717795 | 3  | 538 |
| chr4:46391904-46392572    | chr4  | 46391904  | 46392572  | 0.193647581 | 0.248330895 | -0.054683314 | 6  | 539 |
| chr7:73021487-73021720    | chr7  | 73021487  | 73021720  | 0.250348242 | 0.219926774 | 0.030421468  | 4  | 540 |
| chr19:7980971-7982983     | chr19 | 7980971   | 7982983   | 0.402009125 | 0.446965013 | -0.044955888 | 5  | 541 |
| chr15:66274584-66274838   | chr15 | 66274584  | 66274838  | 0.157537294 | 0.12387654  | 0.033660754  | 4  | 542 |
| chrX:70338281-70338866    | chrX  | 70338281  | 70338866  | 0.465273892 | 0.515319517 | -0.050045625 | 5  | 543 |
| chr12:56101213-56101600   | chr12 | 56101213  | 56101600  | 0.123755434 | 0.156244354 | -0.03248892  | 4  | 544 |
| chr4:37978703-37979595    | chr4  | 37978703  | 37979595  | 0.104036043 | 0.141546223 | -0.03751018  | 4  | 545 |
| chr12:103696091-103696418 | chr12 | 103696091 | 103696418 | 0.51175945  | 0.566173137 | -0.054413687 | 3  | 546 |
| chr3:128145258-128145656  | chr3  | 128145258 | 128145656 | 0.071970366 | 0.116267635 | -0.044297269 | 2  | 547 |
| chr10:81966990-81967517   | chr10 | 81966990  | 81967517  | 0.555757079 | 0.608332528 | -0.05257545  | 3  | 548 |
| chr8:82542799-82543475    | chr8  | 82542799  | 82543475  | 0.698334414 | 0.64161621  | 0.056718204  | 6  | 549 |
| chr12:81471570-81472119   | chr12 | 81471570  | 81472119  | 0.424832282 | 0.455114001 | -0.030281719 | 9  | 550 |
| chr7:124404175-124404432  | chr7  | 124404175 | 124404432 | 0.568294609 | 0.691306386 | -0.123011777 | 3  | 551 |
| chr8:1245672-1246464      | chr8  | 1245672   | 1246464   | 0.547915078 | 0.599935798 | -0.05202072  | 5  | 552 |
| chr17:40714088-40715282   | chr17 | 40714088  | 40715282  | 0.320767025 | 0.393223552 | -0.072456527 | 11 | 553 |
| chrX:117861215-117862177  | chrX  | 117861215 | 117862177 | 0.44107733  | 0.483811967 | -0.042734637 | 7  | 554 |
| chr21:10989914-10991413   | chr21 | 10989914  | 10991413  | 0.626109192 | 0.677325369 | -0.051216177 | 6  | 555 |
| chr8:21966486-21967329    | chr8  | 21966486  | 21967329  | 0.156606075 | 0.122383438 | 0.034222637  | 4  | 556 |
| chr9:4740695-4741868      | chr9  | 4740695   | 4741868   | 0.193384665 | 0.223616518 | -0.030231853 | 4  | 557 |
| chr9:86237967-86238536    | chr9  | 86237967  | 86238536  | 0.24807839  | 0.306377122 | -0.058298732 | 2  | 558 |
| chr2:217497812-217498847  | chr2  | 217497812 | 217498847 | 0.068812145 | 0.09886323  | -0.030051085 | 6  | 559 |
| chr9:134699142-134699523  | chr9  | 134699142 | 134699523 | 0.85439956  | 0.791657595 | 0.062741966  | 2  | 560 |
| chr17:38935800-38936093   | chr17 | 38935800  | 38936093  | 0.583543079 | 0.630136067 | -0.046592989 | 4  | 561 |
| chr22:43505952-43506167   | chr22 | 43505952  | 43506167  | 0.74386045  | 0.678686741 | 0.065173709  | 3  | 562 |
| chr15:79574831-79575211   | chr15 | 79574831  | 79575211  | 0.119065752 | 0.156737525 | -0.037671773 | 4  | 563 |
| chr16:10972783-10973305   | chr16 | 10972783  | 10973305  | 0.214845264 | 0.184845699 | 0.029999566  | 3  | 564 |
| chr16:58497034-58498595   | chr16 | 58497034  | 58498595  | 0.104486277 | 0.07449384  | 0.029992436  | 14 | 565 |
| chr22:30642438-30642671   | chr22 | 30642438  | 30642671  | 0.119460256 | 0.08950522  | 0.029955036  | 1  | 566 |
| chr22:44257943-44258612   | chr22 | 44257943  | 44258612  | 0.190641049 | 0.247963657 | -0.057322608 | 6  | 567 |
| chr7:157503470-157504144  | chr7  | 157503470 | 157504144 | 0.755400572 | 0.826271946 | -0.070871374 | 4  | 568 |
| chr16:71917739-71918542   | chr16 | 71917739  | 71918542  | 0.142049109 | 0.171934596 | -0.029885487 | 3  | 569 |
| chr9:132437925-132438156  | chr9  | 132437925 | 132438156 | 0.793960364 | 0.875002636 | -0.081042271 | 1  | 570 |
| chr19:52954462-52954845   | chr19 | 52954462  | 52954845  | 0.692478212 | 0.577009268 | 0.115468945  | 3  | 571 |
| chr19:9608805-9609343     | chr19 | 9608805   | 9609343   | 0.344359633 | 0.481168533 | -0.136808901 | 5  | 572 |
| chr11:554714-556560       | chr11 | 554714    | 556560    | 0.565025788 | 0.517367609 | 0.047658179  | 5  | 573 |
| chrX:107334421-107335139  | chrX  | 107334421 | 107335139 | 0.257771497 | 0.287563353 | -0.029791856 | 9  | 574 |
| chr8:142401534-142402494  | chr8  | 142401534 | 142402494 | 0.555819254 | 0.513650743 | 0.042168511  | 4  | 575 |
| chr9:37800566-37801563    | chr9  | 37800566  | 37801563  | 0.100229983 | 0.129987902 | -0.029757919 | 4  | 576 |
| chr18:76486314-76486864   | chr18 | 76486314  | 76486864  | 0.701024068 | 0.656128139 | 0.044895929  | 3  | 577 |
| chr19:1591428-1591628     | chr19 | 1591428   | 1591628   | 0.118565441 | 0.088869962 | 0.029695479  | 3  | 578 |
| chr20:58179809-58180787   | chr20 | 58179809  | 58180787  | 0.625165465 | 0.707348286 | -0.082182821 | 5  | 579 |
| chr4:3873093-3874011      | chr4  | 3873093   | 3874011   | 0.469448481 | 0.43852569  | 0.030922791  | 5  | 580 |
| chr1:156674859-156676654  | chr1  | 156674859 | 156676654 | 0.175933109 | 0.205585822 | -0.029652713 | 12 | 581 |

|                           |       |           |           |             |             |              |    |     |
|---------------------------|-------|-----------|-----------|-------------|-------------|--------------|----|-----|
| chr16:86588436-86589513   | chr16 | 86588436  | 86589513  | 0.163194106 | 0.198960857 | -0.035766751 | 13 | 582 |
| chr7:77044841-77045719    | chr7  | 77044841  | 77045719  | 0.597453201 | 0.710984853 | -0.113531652 | 4  | 583 |
| chr1:201437520-201438648  | chr1  | 201437520 | 201438648 | 0.126825721 | 0.156431092 | -0.029605371 | 7  | 584 |
| chr1:21948675-21949263    | chr1  | 21948675  | 21949263  | 0.451466273 | 0.516891377 | -0.065425104 | 3  | 585 |
| chrX:152066197-152066811  | chrX  | 152066197 | 152066811 | 0.586133646 | 0.643091587 | -0.056957942 | 7  | 586 |
| chr19:59010485-59011011   | chr19 | 59010485  | 59011011  | 0.519884371 | 0.486699584 | 0.033184786  | 4  | 587 |
| chrX:57021592-57022044    | chrX  | 57021592  | 57022044  | 0.585322131 | 0.632142742 | -0.046820611 | 2  | 588 |
| chr4:183727550-183728353  | chr4  | 183727550 | 183728353 | 0.500155413 | 0.56700712  | -0.066851707 | 4  | 589 |
| chr7:151106245-151107808  | chr7  | 151106245 | 151107808 | 0.311749078 | 0.345456692 | -0.033707614 | 7  | 590 |
| chr19:18061196-18061473   | chr19 | 18061196  | 18061473  | 0.081653682 | 0.111184848 | -0.029531166 | 3  | 591 |
| chr5:140762402-140762768  | chr5  | 140762402 | 140762768 | 0.930487231 | 0.852300636 | 0.078186595  | 1  | 592 |
| chr7:6543796-6544108      | chr7  | 6543796   | 6544108   | 0.107050312 | 0.136576021 | -0.029525709 | 2  | 593 |
| chr21:34638516-34639075   | chr21 | 34638516  | 34639075  | 0.091298668 | 0.061809167 | 0.029489501  | 6  | 594 |
| chr4:144620823-144622218  | chr4  | 144620823 | 144622218 | 0.478542569 | 0.544275983 | -0.065733414 | 7  | 595 |
| chr22:43165948-43166287   | chr22 | 43165948  | 43166287  | 0.560964248 | 0.626330895 | -0.065366647 | 2  | 596 |
| chr3:36805950-36806214    | chr3  | 36805950  | 36806214  | 0.710699038 | 0.65460257  | 0.056096467  | 2  | 597 |
| chr11:64692061-64692496   | chr11 | 64692061  | 64692496  | 0.098805058 | 0.069138471 | 0.029666586  | 7  | 598 |
| chr19:1875633-1877921     | chr19 | 1875633   | 1877921   | 0.307491656 | 0.278091046 | 0.029400611  | 5  | 599 |
| chr10:134016044-134016344 | chr10 | 134016044 | 134016344 | 0.918925908 | 0.849951021 | 0.068974887  | 2  | 600 |
| chr5:178367621-178368725  | chr5  | 178367621 | 178368725 | 0.717859042 | 0.666507361 | 0.051351681  | 11 | 601 |
| chr9:119976798-119977010  | chr9  | 119976798 | 119977010 | 0.797666918 | 0.727827854 | 0.069839064  | 1  | 602 |
| chr2:68870352-68871055    | chr2  | 68870352  | 68871055  | 0.129272501 | 0.212257461 | -0.08298496  | 5  | 603 |
| chr16:86539119-86539486   | chr16 | 86539119  | 86539486  | 0.161717902 | 0.200274349 | -0.038556447 | 1  | 604 |
| chr7:50861391-50861638    | chr7  | 50861391  | 50861638  | 0.109475562 | 0.13880753  | -0.029331968 | 9  | 605 |
| chr1:151300523-151300724  | chr1  | 151300523 | 151300724 | 0.489868466 | 0.545753127 | -0.055884661 | 3  | 606 |
| chr14:75447512-75447779   | chr14 | 75447512  | 75447779  | 0.569730472 | 0.629469884 | -0.059739412 | 3  | 607 |
| chr2:31360322-31361821    | chr2  | 31360322  | 31361821  | 0.345307324 | 0.386499463 | -0.041192139 | 12 | 608 |
| chrX:153193514-153194074  | chrX  | 153193514 | 153194074 | 0.224648481 | 0.253966959 | -0.029318478 | 2  | 609 |
| chr13:109147799-109149019 | chr13 | 109147799 | 109149019 | 0.503828662 | 0.440008915 | 0.063819748  | 3  | 610 |
| chrX:153745524-153745735  | chrX  | 153745524 | 153745735 | 0.748048228 | 0.814475087 | -0.066426859 | 3  | 611 |
| chr19:1274470-1276358     | chr19 | 1274470   | 1276358   | 0.166837856 | 0.19601012  | -0.029172264 | 10 | 612 |
| chr19:53794412-53794732   | chr19 | 53794412  | 53794732  | 0.704683235 | 0.667544717 | 0.037138518  | 3  | 613 |
| chr11:3181575-3182120     | chr11 | 3181575   | 3182120   | 0.163333931 | 0.192489996 | -0.029156065 | 5  | 614 |
| chr11:50227032-50227326   | chr11 | 50227032  | 50227326  | 0.651067876 | 0.589124611 | 0.061943265  | 4  | 615 |
| chr17:42906811-42908061   | chr17 | 42906811  | 42908061  | 0.10030953  | 0.129388367 | -0.029078837 | 4  | 616 |
| chr19:50833814-50834128   | chr19 | 50833814  | 50834128  | 0.516373184 | 0.483815424 | 0.032557759  | 2  | 617 |
| chr4:183838037-183839286  | chr4  | 183838037 | 183839286 | 0.245080754 | 0.294284765 | -0.049204011 | 10 | 618 |
| chr13:102568426-102569495 | chr13 | 102568426 | 102569495 | 0.287886798 | 0.316941787 | -0.029054989 | 3  | 619 |
| chr19:19256552-19256824   | chr19 | 19256552  | 19256824  | 0.550088901 | 0.579141573 | -0.029052672 | 2  | 620 |
| chr9:139726218-139726440  | chr9  | 139726218 | 139726440 | 0.831869066 | 0.906485232 | -0.074616166 | 1  | 621 |
| chr1:167789397-167789647  | chr1  | 167789397 | 167789647 | 0.110305153 | 0.146747764 | -0.036442611 | 3  | 622 |
| chr12:7046238-7047257     | chr12 | 7046238   | 7047257   | 0.39157043  | 0.420539653 | -0.028969223 | 4  | 623 |
| chr17:42091713-42091948   | chr17 | 42091713  | 42091948  | 0.327551436 | 0.298601376 | 0.02895006   | 4  | 624 |
| chr1:24742672-24743039    | chr1  | 24742672  | 24743039  | 0.076759221 | 0.132119001 | -0.05535978  | 3  | 625 |
| chr12:49760222-49761127   | chr12 | 49760222  | 49761127  | 0.067248761 | 0.101083636 | -0.033834875 | 5  | 626 |
| chr16:1069295-1070214     | chr16 | 1069295   | 1070214   | 0.617127309 | 0.676316771 | -0.059189463 | 5  | 627 |
| chr12:127940452-127940907 | chr12 | 127940452 | 127940907 | 0.657941391 | 0.615872498 | 0.042068893  | 3  | 628 |
| chrX:102942108-102942486  | chrX  | 102942108 | 102942486 | 0.496750284 | 0.536557869 | -0.039807584 | 2  | 629 |
| chr2:24307027-24307678    | chr2  | 24307027  | 24307678  | 0.144668397 | 0.107849874 | 0.036818522  | 4  | 630 |
| chr19:15918424-15918704   | chr19 | 15918424  | 15918704  | 0.57703835  | 0.525113899 | 0.051924451  | 1  | 631 |
| chrY:17567580-17568617    | chrY  | 17567580  | 17568617  | 0.392297295 | 0.427525915 | -0.03522862  | 1  | 632 |
| chr20:60941620-60942684   | chr20 | 60941620  | 60942684  | 0.147934827 | 0.176751995 | -0.028817168 | 4  | 633 |
| chr1:45308544-45309159    | chr1  | 45308544  | 45309159  | 0.110886948 | 0.139695479 | -0.028808531 | 4  | 634 |
| chr14:48143434-48145589   | chr14 | 48143434  | 48145589  | 0.249130505 | 0.196691425 | 0.05243908   | 8  | 635 |
| chr8:122651666-122652389  | chr8  | 122651666 | 122652389 | 0.168238954 | 0.205045143 | -0.03680619  | 5  | 636 |
| chrX:139846647-139846955  | chrX  | 139846647 | 139846955 | 0.623305392 | 0.67485736  | -0.051551968 | 3  | 637 |
| chr9:77113710-77113927    | chr9  | 77113710  | 77113927  | 0.368986423 | 0.225426878 | 0.143559545  | 1  | 638 |
| chr11:73371801-73372632   | chr11 | 73371801  | 73372632  | 0.514733298 | 0.480713786 | 0.034019512  | 3  | 639 |
| chr10:118934735-118935180 | chr10 | 118934735 | 118935180 | 0.567818757 | 0.613982865 | -0.046164109 | 3  | 640 |
| chr20:43921950-43922642   | chr20 | 43921950  | 43922642  | 0.605566251 | 0.648042224 | -0.042475973 | 3  | 641 |
| chr2:177502241-177502910  | chr2  | 177502241 | 177502910 | 0.223576884 | 0.257915362 | -0.034338478 | 5  | 642 |
| chr7:100815485-100816995  | chr7  | 100815485 | 100816995 | 0.185984516 | 0.224062589 | -0.038078074 | 7  | 643 |
| chr18:77532391-77532593   | chr18 | 77532391  | 77532593  | 0.851078561 | 0.784441416 | 0.066637145  | 2  | 644 |
| chr12:130526916-130527117 | chr12 | 130526916 | 130527117 | 0.251236229 | 0.203952546 | 0.047283683  | 7  | 645 |
| chr13:113622738-113623660 | chr13 | 113622738 | 113623660 | 0.29351256  | 0.322110994 | -0.028598434 | 7  | 646 |
| chr3:133646095-133646650  | chr3  | 133646095 | 133646650 | 0.457783893 | 0.492330328 | -0.034546435 | 2  | 647 |
| chr20:44642095-44642406   | chr20 | 44642095  | 44642406  | 0.654273862 | 0.71876453  | -0.064490668 | 2  | 648 |
| chr11:130297402-130298517 | chr11 | 130297402 | 130298517 | 0.118475759 | 0.150209413 | -0.031733654 | 7  | 649 |
| chrX:53713069-53713794    | chrX  | 53713069  | 53713794  | 0.394690963 | 0.433702732 | -0.039011769 | 7  | 650 |
| chr1:24229116-24229537    | chr1  | 24229116  | 24229537  | 0.715327875 | 0.666188007 | 0.049139868  | 2  | 651 |
| chr19:3831364-3831807     | chr19 | 3831364   | 3831807   | 0.852403452 | 0.916914721 | -0.064511269 | 3  | 652 |
| chrX:146993092-146994200  | chrX  | 146993092 | 146994200 | 0.470519583 | 0.520849295 | -0.050329712 | 10 | 653 |
| chr19:2578957-2579746     | chr19 | 2578957   | 2579746   | 0.227034527 | 0.255555238 | -0.028520711 | 5  | 654 |

|                           |       |           |           |             |             |              |    |     |
|---------------------------|-------|-----------|-----------|-------------|-------------|--------------|----|-----|
| chr17:42061047-42061643   | chr17 | 42061047  | 42061643  | 0.151635123 | 0.180150848 | -0.028515725 | 4  | 655 |
| chr12:4273820-4274491     | chr12 | 4273820   | 4274491   | 0.691829382 | 0.609699625 | 0.082129757  | 3  | 656 |
| chr18:35065040-35065548   | chr18 | 35065040  | 35065548  | 0.130777884 | 0.159243399 | -0.028465515 | 3  | 657 |
| chr4:185746558-185747827  | chr4  | 185746558 | 185747827 | 0.079242339 | 0.107695723 | -0.028453384 | 11 | 658 |
| chr10:23982383-23982589   | chr10 | 23982383  | 23982589  | 0.293197944 | 0.232282803 | 0.060915141  | 3  | 659 |
| chr7:6654746-6655860      | chr7  | 6654746   | 6655860   | 0.436048055 | 0.390073724 | 0.04597433   | 5  | 660 |
| chr6:134159127-134159349  | chr6  | 134159127 | 134159349 | 0.132443271 | 0.192549329 | -0.060106058 | 3  | 661 |
| chr16:88459516-88459739   | chr16 | 88459516  | 88459739  | 0.760391358 | 0.702052987 | 0.058338371  | 4  | 662 |
| chr19:1766145-1766364     | chr19 | 1766145   | 1766364   | 0.635039068 | 0.584119329 | 0.050919739  | 2  | 663 |
| chr1:209920954-209921345  | chr1  | 209920954 | 209921345 | 0.256301105 | 0.285844181 | -0.029543076 | 4  | 664 |
| chr10:23384534-23385078   | chr10 | 23384534  | 23385078  | 0.092013895 | 0.120374186 | -0.028360291 | 5  | 665 |
| chr10:44143857-44144698   | chr10 | 44143857  | 44144698  | 0.173560058 | 0.217104119 | -0.04354406  | 10 | 666 |
| chrX:145700794-145702281  | chrX  | 145700794 | 145702281 | 0.569088104 | 0.600876416 | -0.031788313 | 4  | 667 |
| chr7:158037709-158038048  | chr7  | 158037709 | 158038048 | 0.433331256 | 0.470088283 | -0.036757026 | 3  | 668 |
| chr18:21269270-21270349   | chr18 | 21269270  | 21270349  | 0.304938024 | 0.333263806 | -0.028325782 | 5  | 669 |
| chr18:51883948-51884994   | chr18 | 51883948  | 51884994  | 0.13216327  | 0.162836742 | -0.030673472 | 8  | 670 |
| chr9:68298597-68299115    | chr9  | 68298597  | 68299115  | 0.650229052 | 0.698801853 | -0.048572801 | 3  | 671 |
| chr16:1458144-1458435     | chr16 | 1458144   | 1458435   | 0.159032423 | 0.187271095 | -0.028238672 | 1  | 672 |
| chr17:36575500-36575782   | chr17 | 36575500  | 36575782  | 0.057527178 | 0.085734645 | -0.028207467 | 2  | 673 |
| chr6:44094709-44096134    | chr6  | 44094709  | 44096134  | 0.132436326 | 0.16059494  | -0.028158615 | 5  | 674 |
| chrX:152735785-152736193  | chrX  | 152735785 | 152736193 | 0.438713136 | 0.470586804 | -0.031873668 | 4  | 675 |
| chr5:3326329-3326645      | chr5  | 3326329   | 3326645   | 0.71911767  | 0.801638804 | -0.082521134 | 3  | 676 |
| chrX:119385465-119385835  | chrX  | 119385465 | 119385835 | 0.439684092 | 0.471057458 | -0.031373366 | 4  | 677 |
| chr4:5889204-5890645      | chr4  | 5889204   | 5890645   | 0.067883982 | 0.104500429 | -0.036616447 | 13 | 678 |
| chr16:5037530-5037797     | chr16 | 5037530   | 5037797   | 0.840144764 | 0.911920061 | -0.071775297 | 1  | 679 |
| chrX:49643907-49644501    | chrX  | 49643907  | 49644501  | 0.27793731  | 0.306032686 | -0.028095376 | 4  | 680 |
| chr17:57287356-57287792   | chr17 | 57287356  | 57287792  | 0.071937936 | 0.100020046 | -0.02808211  | 5  | 681 |
| chr8:1137208-1138672      | chr8  | 1137208   | 1138672   | 0.710060786 | 0.765703632 | -0.055642846 | 3  | 682 |
| chr19:9204247-9204490     | chr19 | 9204247   | 9204490   | 0.412701702 | 0.473914713 | -0.061213012 | 2  | 683 |
| chr3:56716493-56717658    | chr3  | 56716493  | 56717658  | 0.170460244 | 0.128122613 | 0.042337631  | 6  | 684 |
| chr20:44642606-44643111   | chr20 | 44642606  | 44643111  | 0.059851586 | 0.091191643 | -0.031340058 | 3  | 685 |
| chr20:35491002-35492805   | chr20 | 35491002  | 35492805  | 0.294975515 | 0.32928304  | -0.034307525 | 9  | 686 |
| chr1:20126030-20126780    | chr1  | 20126030  | 20126780  | 0.18781848  | 0.155007249 | 0.032811231  | 8  | 687 |
| chr7:37960317-37961046    | chr7  | 37960317  | 37961046  | 0.07691895  | 0.104908476 | -0.027989526 | 5  | 688 |
| chr19:3028593-3029299     | chr19 | 3028593   | 3029299   | 0.191284264 | 0.16284933  | 0.028434934  | 3  | 689 |
| chr8:54569668-54570010    | chr8  | 54569668  | 54570010  | 0.914859572 | 0.844902965 | 0.069956607  | 3  | 690 |
| chr16:67034471-67035340   | chr16 | 67034471  | 67035340  | 0.858006134 | 0.791915621 | 0.066090513  | 4  | 691 |
| chrX:139589971-139590480  | chrX  | 139589971 | 139590480 | 0.540919005 | 0.508088189 | 0.032830816  | 4  | 692 |
| chr16:56715993-56716425   | chr16 | 56715993  | 56716425  | 0.23276061  | 0.110869923 | 0.121890686  | 9  | 693 |
| chr1:161008378-161008830  | chr1  | 161008378 | 161008830 | 0.747424451 | 0.688287922 | 0.059136529  | 8  | 694 |
| chr14:24520990-24521844   | chr14 | 24520990  | 24521844  | 0.082123479 | 0.054284032 | 0.027839448  | 3  | 695 |
| chr15:91414312-91415427   | chr15 | 91414312  | 91415427  | 0.170261582 | 0.142424622 | 0.02783696   | 4  | 696 |
| chr2:26396103-26397204    | chr2  | 26396103  | 26397204  | 0.54492486  | 0.596589223 | -0.051664363 | 4  | 697 |
| chr19:36336276-36337138   | chr19 | 36336276  | 36337138  | 0.167182696 | 0.194986866 | -0.02780417  | 5  | 698 |
| chr20:49548195-49548525   | chr20 | 49548195  | 49548525  | 0.751019999 | 0.692909007 | 0.058110992  | 3  | 699 |
| chr22:45898295-45899357   | chr22 | 45898295  | 45899357  | 0.495695529 | 0.45786376  | 0.037831769  | 7  | 700 |
| chr17:51834651-51834900   | chr17 | 51834651  | 51834900  | 0.741013114 | 0.687840345 | 0.053172769  | 2  | 701 |
| chr10:123922851-123923542 | chr10 | 123922851 | 123923542 | 0.187464601 | 0.215135298 | -0.027670697 | 9  | 702 |
| chr2:220361463-220363254  | chr2  | 220361463 | 220363254 | 0.785942122 | 0.743577813 | 0.04236431   | 11 | 703 |
| chr9:132244402-132245732  | chr9  | 132244402 | 132245732 | 0.133789334 | 0.16145264  | -0.027663306 | 5  | 704 |
| chr16:28833905-28835873   | chr16 | 28833905  | 28835873  | 0.139045167 | 0.166689171 | -0.027644004 | 9  | 705 |
| chr3:183145428-183146790  | chr3  | 183145428 | 183146790 | 0.219863582 | 0.256508802 | -0.03664522  | 12 | 706 |
| chr5:119800972-119801194  | chr5  | 119800972 | 119801194 | 0.178550965 | 0.233726025 | -0.05517506  | 3  | 707 |
| chr19:15871065-15871318   | chr19 | 15871065  | 15871318  | 0.327141867 | 0.373675207 | -0.046533339 | 3  | 708 |
| chr7:89950259-89950778    | chr7  | 89950259  | 89950778  | 0.084696812 | 0.112292961 | -0.027596149 | 4  | 709 |
| chr11:132812663-132813075 | chr11 | 132812663 | 132813075 | 0.689641014 | 0.591360246 | 0.098280769  | 2  | 710 |
| chr2:96314996-96315230    | chr2  | 96314996  | 96315230  | 0.816171019 | 0.755767479 | 0.060403541  | 2  | 711 |
| chr17:33775295-33775794   | chr17 | 33775295  | 33775794  | 0.51130778  | 0.538850795 | -0.027543016 | 5  | 712 |
| chr22:50608208-50608660   | chr22 | 50608208  | 50608660  | 0.306988781 | 0.271495865 | 0.035492916  | 5  | 713 |
| chr16:20084708-20085305   | chr16 | 20084708  | 20085305  | 0.413339104 | 0.354497338 | 0.058841766  | 4  | 714 |
| chr5:50683286-50683615    | chr5  | 50683286  | 50683615  | 0.691201936 | 0.738319947 | -0.047118011 | 4  | 715 |
| chr19:47960106-47960890   | chr19 | 47960106  | 47960890  | 0.876983856 | 0.817919377 | 0.05906448   | 3  | 716 |
| chr3:137489595-137491004  | chr3  | 137489595 | 137491004 | 0.272052164 | 0.299383388 | -0.027331224 | 7  | 717 |
| chr2:209271338-209271987  | chr2  | 209271338 | 209271987 | 0.71317828  | 0.657934646 | 0.055243634  | 7  | 718 |
| chr12:72233324-72233635   | chr12 | 72233324  | 72233635  | 0.077318153 | 0.104644533 | -0.02732638  | 8  | 719 |
| chr11:78127966-78129400   | chr11 | 78127966  | 78129400  | 0.114841586 | 0.082448584 | 0.032393002  | 5  | 720 |
| chr11:57232314-57232573   | chr11 | 57232314  | 57232573  | 0.830647555 | 0.785747229 | 0.044900326  | 4  | 721 |
| chr19:16582114-16583299   | chr19 | 16582114  | 16583299  | 0.184352129 | 0.157089823 | 0.027262306  | 5  | 722 |
| chr12:114029319-114029752 | chr12 | 114029319 | 114029752 | 0.151111517 | 0.178318733 | -0.027207216 | 4  | 723 |
| chr3:68056900-68057167    | chr3  | 68056900  | 68057167  | 0.496362034 | 0.57596447  | -0.079602435 | 2  | 724 |
| chr6:43237261-43237643    | chr6  | 43237261  | 43237643  | 0.562227886 | 0.535030277 | 0.027197608  | 3  | 725 |
| chr1:33721449-33721703    | chr1  | 33721449  | 33721703  | 0.380822465 | 0.341388763 | 0.039433702  | 2  | 726 |
| chr16:67449937-67450472   | chr16 | 67449937  | 67450472  | 0.421269313 | 0.331233297 | 0.090036015  | 3  | 727 |

|                           |       |           |           |             |             |              |    |     |
|---------------------------|-------|-----------|-----------|-------------|-------------|--------------|----|-----|
| chr9:130689379-130690215  | chr9  | 130689379 | 130690215 | 0.915558045 | 0.849848792 | 0.065709253  | 4  | 728 |
| chrX:153151017-153152219  | chrX  | 153151017 | 153152219 | 0.561235489 | 0.594507338 | -0.033271849 | 5  | 729 |
| chr7:92219061-92219873    | chr7  | 92219061  | 92219873  | 0.261160939 | 0.288225665 | -0.027064726 | 8  | 730 |
| chr16:609773-611178       | chr16 | 609773    | 611178    | 0.634788608 | 0.587894259 | 0.04689435   | 5  | 731 |
| chr17:77903888-77904397   | chr17 | 77903888  | 77904397  | 0.489001425 | 0.528598382 | -0.039596958 | 5  | 732 |
| chr5:140248790-140249140  | chr5  | 140248790 | 140249140 | 0.435140122 | 0.465263291 | -0.030123169 | 2  | 733 |
| chr9:44858800-44859106    | chr9  | 44858800  | 44859106  | 0.568557144 | 0.614935758 | -0.046378614 | 1  | 734 |
| chr20:62733464-62734322   | chr20 | 62733464  | 62734322  | 0.186112894 | 0.228099825 | -0.041986931 | 5  | 735 |
| chr12:114881650-114881937 | chr12 | 114881650 | 114881937 | 0.757569013 | 0.70231335  | 0.055255663  | 3  | 736 |
| chr1:91182510-91182857    | chr1  | 91182510  | 91182857  | 0.44445375  | 0.481772403 | -0.037318652 | 5  | 737 |
| chr7:30028519-30029822    | chr7  | 30028519  | 30029822  | 0.319000077 | 0.279109504 | 0.039890573  | 11 | 738 |
| chr20:21501962-21503931   | chr20 | 21501962  | 21503931  | 0.103400512 | 0.130263216 | -0.026862704 | 7  | 739 |
| chrX:150066793-150068172  | chrX  | 150066793 | 150068172 | 0.303327451 | 0.330189689 | -0.026862238 | 10 | 740 |
| chr16:67188614-67189652   | chr16 | 67188614  | 67189652  | 0.620714762 | 0.670878385 | -0.050163623 | 3  | 741 |
| chr9:126803262-126803672  | chr9  | 126803262 | 126803672 | 0.16970672  | 0.142880985 | 0.026825736  | 1  | 742 |
| chr20:16555519-16555779   | chr20 | 16555519  | 16555779  | 0.105642763 | 0.078838371 | 0.026804392  | 4  | 743 |
| chr12:57853716-57853973   | chr12 | 57853716  | 57853973  | 0.084982745 | 0.111757829 | -0.026775084 | 4  | 744 |
| chr22:49063539-49063900   | chr22 | 49063539  | 49063900  | 0.855329199 | 0.924002221 | -0.068673022 | 1  | 745 |
| chr1:201475886-201476516  | chr1  | 201475886 | 201476516 | 0.744235317 | 0.684502287 | 0.05973303   | 7  | 746 |
| chr22:44419825-44420790   | chr22 | 44419825  | 44420790  | 0.659896595 | 0.718321905 | -0.05842531  | 7  | 747 |
| chr14:38677155-38677787   | chr14 | 38677155  | 38677787  | 0.209591573 | 0.176350247 | 0.033241326  | 4  | 748 |
| chr20:4129483-4130412     | chr20 | 4129483   | 4130412   | 0.065450417 | 0.092181414 | -0.026730997 | 2  | 749 |
| chr17:7197432-7198417     | chr17 | 7197432   | 7198417   | 0.701992057 | 0.73047493  | -0.028482873 | 12 | 750 |
| chr22:19748651-19749189   | chr22 | 19748651  | 19749189  | 0.51951382  | 0.56521449  | -0.045700671 | 4  | 751 |
| chr7:139762256-139763245  | chr7  | 139762256 | 139763245 | 0.167203529 | 0.122119126 | 0.045084403  | 3  | 752 |
| chr5:180700378-180700687  | chr5  | 180700378 | 180700687 | 0.584686458 | 0.635333854 | -0.050647396 | 2  | 753 |
| chr14:19685064-19687329   | chr14 | 19685064  | 19687329  | 0.80092643  | 0.863029117 | -0.062102687 | 3  | 754 |
| chr4:7194538-7195467      | chr4  | 7194538   | 7195467   | 0.233210543 | 0.259829494 | -0.026618951 | 6  | 755 |
| chr1:154540234-154540573  | chr1  | 154540234 | 154540573 | 0.290067455 | 0.316682244 | -0.026614789 | 4  | 756 |
| chr9:132020630-132021038  | chr9  | 132020630 | 132021038 | 0.070939165 | 0.114903656 | -0.04396449  | 2  | 757 |
| chr17:40573741-40575526   | chr17 | 40573741  | 40575526  | 0.123570556 | 0.156376455 | -0.032805899 | 10 | 758 |
| chr18:76541148-76541888   | chr18 | 76541148  | 76541888  | 0.702733992 | 0.76076914  | -0.058035148 | 3  | 759 |
| chr10:2563740-2565222     | chr10 | 2563740   | 2565222   | 0.56734237  | 0.622372035 | -0.055029665 | 3  | 760 |
| chr10:9449139-9450209     | chr10 | 9449139   | 9450209   | 0.741022953 | 0.785512277 | -0.044489324 | 5  | 761 |
| chr5:180229376-180230147  | chr5  | 180229376 | 180230147 | 0.358656769 | 0.408466331 | -0.049809562 | 7  | 762 |
| chr9:138593528-138594253  | chr9  | 138593528 | 138594253 | 0.110702003 | 0.147882633 | -0.03718063  | 3  | 763 |
| chr19:53360202-53360460   | chr19 | 53360202  | 53360460  | 0.523230185 | 0.47658937  | 0.046640814  | 1  | 764 |
| chr1:15573621-15573953    | chr1  | 15573621  | 15573953  | 0.307977127 | 0.334449325 | -0.026472197 | 4  | 765 |
| chr19:22193331-22193583   | chr19 | 22193331  | 22193583  | 0.291391411 | 0.317851606 | -0.026460195 | 3  | 766 |
| chr2:181844792-181845514  | chr2  | 181844792 | 181845514 | 0.21544512  | 0.254987094 | -0.039541975 | 5  | 767 |
| chr5:77943869-77945220    | chr5  | 77943869  | 77945220  | 0.103628789 | 0.130068536 | -0.026439747 | 5  | 768 |
| chr11:57249947-57250848   | chr11 | 57249947  | 57250848  | 0.479239792 | 0.433513852 | 0.04572594   | 4  | 769 |
| chr11:92702790-92703434   | chr11 | 92702790  | 92703434  | 0.733344159 | 0.662038684 | 0.071305475  | 3  | 770 |
| chr12:65514879-65515863   | chr12 | 65514879  | 65515863  | 0.706956552 | 0.659163504 | 0.047793049  | 7  | 771 |
| chr12:103359249-103359629 | chr12 | 103359249 | 103359629 | 0.681031254 | 0.630313291 | 0.050717962  | 4  | 772 |
| chrX:30326440-30327668    | chrX  | 30326440  | 30327668  | 0.504443018 | 0.44883233  | 0.055610688  | 12 | 773 |
| chr9:130533454-130533882  | chr9  | 130533454 | 130533882 | 0.080651712 | 0.107027307 | -0.026375594 | 1  | 774 |
| chr7:152591061-152591360  | chr7  | 152591061 | 152591360 | 0.772180544 | 0.827796435 | -0.055615891 | 3  | 775 |
| chrX:73834000-73834597    | chrX  | 73834000  | 73834597  | 0.602472915 | 0.648738329 | -0.046265414 | 7  | 776 |
| chr21:11106719-11107132   | chr21 | 11106719  | 11107132  | 0.68324739  | 0.736843218 | -0.053595828 | 2  | 777 |
| chr5:148033473-148034080  | chr5  | 148033473 | 148034080 | 0.528050043 | 0.493048498 | 0.035001545  | 6  | 778 |
| chr4:38869402-38869780    | chr4  | 38869402  | 38869780  | 0.504114326 | 0.54060011  | -0.036485784 | 7  | 779 |
| chr16:28634441-28635031   | chr16 | 28634441  | 28635031  | 0.875547092 | 0.812951793 | 0.062595299  | 3  | 780 |
| chr6:167587355-167587559  | chr6  | 167587355 | 167587559 | 0.682691675 | 0.735939952 | -0.053248277 | 1  | 781 |
| chr8:12219512-12219916    | chr8  | 12219512  | 12219916  | 0.16883185  | 0.142620584 | 0.026211266  | 1  | 782 |
| chr16:28752083-28752332   | chr16 | 28752083  | 28752332  | 0.869671192 | 0.807033051 | 0.062638141  | 1  | 783 |
| chr20:41817476-41819212   | chr20 | 41817476  | 41819212  | 0.438486718 | 0.464654385 | -0.026167667 | 11 | 784 |
| chr10:118922352-118923520 | chr10 | 118922352 | 118923520 | 0.348529688 | 0.374688782 | -0.026159095 | 6  | 785 |
| chr13:112848576-112849221 | chr13 | 112848576 | 112849221 | 0.918768943 | 0.863527844 | 0.055241099  | 4  | 786 |
| chr17:19410596-19411377   | chr17 | 19410596  | 19411377  | 0.145371294 | 0.171446308 | -0.026075013 | 3  | 787 |
| chrX:153585698-153585944  | chrX  | 153585698 | 153585944 | 0.826936845 | 0.888960794 | -0.062023949 | 2  | 788 |
| chr20:62031418-62032423   | chr20 | 62031418  | 62032423  | 0.891203042 | 0.834603876 | 0.056599166  | 3  | 789 |
| chrX:128674134-128674727  | chrX  | 128674134 | 128674727 | 0.44722244  | 0.49124603  | -0.04402359  | 8  | 790 |
| chr10:102792043-102792266 | chr10 | 102792043 | 102792266 | 0.081531742 | 0.144438651 | -0.062906909 | 2  | 791 |
| chr9:98278129-98279754    | chr9  | 98278129  | 98279754  | 0.373152824 | 0.344292804 | 0.028860021  | 5  | 792 |
| chr18:43355319-43355698   | chr18 | 43355319  | 43355698  | 0.602871905 | 0.650145067 | -0.047273162 | 3  | 793 |
| chr6:29521111-29521833    | chr6  | 29521111  | 29521833  | 0.585623894 | 0.502570171 | 0.083053723  | 32 | 794 |
| chr19:55728346-55728629   | chr19 | 55728346  | 55728629  | 0.081725206 | 0.17903631  | -0.097311104 | 1  | 795 |
| chr2:170220773-170221114  | chr2  | 170220773 | 170221114 | 0.249240379 | 0.29168201  | -0.042441631 | 4  | 796 |
| chr5:140558932-140559789  | chr5  | 140558932 | 140559789 | 0.693546874 | 0.643716422 | 0.049830453  | 1  | 797 |
| chr16:88871851-88872056   | chr16 | 88871851  | 88872056  | 0.754266558 | 0.814054435 | -0.059787877 | 3  | 798 |
| chr19:1856726-1857443     | chr19 | 1856726   | 1857443   | 0.835744107 | 0.774491461 | 0.061252647  | 4  | 799 |
| chr19:55880578-55880922   | chr19 | 55880578  | 55880922  | 0.141408092 | 0.099606193 | 0.0418019    | 2  | 800 |

|                           |       |           |           |             |             |              |    |     |
|---------------------------|-------|-----------|-----------|-------------|-------------|--------------|----|-----|
| chr6:143247810-143248438  | chr6  | 143247810 | 143248438 | 0.308856959 | 0.269047165 | 0.039809794  | 3  | 801 |
| chr7:151000580-151001042  | chr7  | 151000580 | 151001042 | 0.124898341 | 0.098953859 | 0.025944482  | 3  | 802 |
| chr6:25652381-25652709    | chr6  | 25652381  | 25652709  | 0.398087398 | 0.432626519 | -0.034539121 | 9  | 803 |
| chr5:134374386-134376751  | chr5  | 134374386 | 134376751 | 0.844936694 | 0.792724209 | 0.052212485  | 8  | 804 |
| chr5:10760837-10761925    | chr5  | 10760837  | 10761925  | 0.166473864 | 0.140582926 | 0.025890938  | 5  | 805 |
| chr7:76145397-76145781    | chr7  | 76145397  | 76145781  | 0.433365948 | 0.492345898 | -0.05897995  | 3  | 806 |
| chr14:32672537-32672915   | chr14 | 32672537  | 32672915  | 0.078725343 | 0.104585274 | -0.02585993  | 3  | 807 |
| chr16:19421817-19422498   | chr16 | 19421817  | 19422498  | 0.143968941 | 0.169900872 | -0.025931931 | 7  | 808 |
| chr1:159141203-159141718  | chr1  | 159141203 | 159141718 | 0.188133848 | 0.229298752 | -0.041164905 | 3  | 809 |
| chr9:139640641-139640885  | chr9  | 139640641 | 139640885 | 0.842165948 | 0.903855747 | -0.061689799 | 2  | 810 |
| chr12:132880704-132882253 | chr12 | 132880704 | 132882253 | 0.848022033 | 0.909633203 | -0.061611117 | 2  | 811 |
| chr11:100998031-100999774 | chr11 | 100998031 | 100999774 | 0.337846652 | 0.401427677 | -0.063581025 | 4  | 812 |
| chr2:50574046-50574817    | chr2  | 50574046  | 50574817  | 0.384152025 | 0.33545198  | 0.048700046  | 4  | 813 |
| chr15:100466481-100466691 | chr15 | 100466481 | 100466691 | 0.276808674 | 0.302505243 | -0.025696569 | 3  | 814 |
| chr2:5832042-5834208      | chr2  | 5832042   | 5834208   | 0.269089788 | 0.294784508 | -0.02569472  | 7  | 815 |
| chr2:132439834-132440422  | chr2  | 132439834 | 132440422 | 0.297611462 | 0.323742748 | -0.026131285 | 7  | 816 |
| chr15:27083993-27084222   | chr15 | 27083993  | 27084222  | 0.285659838 | 0.347158456 | -0.061498617 | 2  | 817 |
| chr3:113603864-113604246  | chr3  | 113603864 | 113604246 | 0.578370665 | 0.623609168 | -0.045238503 | 3  | 818 |
| chr10:48389020-48389375   | chr10 | 48389020  | 48389375  | 0.821714749 | 0.765296876 | 0.056417872  | 2  | 819 |
| chr22:29075101-29076219   | chr22 | 29075101  | 29076219  | 0.456487994 | 0.492430464 | -0.035942469 | 4  | 820 |
| chrX:73639899-73640778    | chrX  | 73639899  | 73640778  | 0.532535555 | 0.570699172 | -0.038163618 | 3  | 821 |
| chr6:6058356-6058664      | chr6  | 6058356   | 6058664   | 0.674671527 | 0.700296033 | -0.025624506 | 3  | 822 |
| chr21:36258953-36259472   | chr21 | 36258953  | 36259472  | 0.124609658 | 0.174053529 | -0.049443871 | 4  | 823 |
| chr8:81785426-81786038    | chr8  | 81785426  | 81786038  | 0.098252136 | 0.123811085 | -0.025558949 | 2  | 824 |
| chr11:6281077-6281307     | chr11 | 6281077   | 6281307   | 0.103348238 | 0.128893797 | -0.025545559 | 4  | 825 |
| chr12:130822361-130822696 | chr12 | 130822361 | 130822696 | 0.840790808 | 0.801215488 | 0.039575319  | 3  | 826 |
| chr14:105293561-105293879 | chr14 | 105293561 | 105293879 | 0.323133737 | 0.29760452  | 0.025529216  | 4  | 827 |
| chr8:977626-978351        | chr8  | 977626    | 978351    | 0.402732025 | 0.438160081 | -0.035428056 | 2  | 828 |
| chr19:3970537-3970746     | chr19 | 3970537   | 3970746   | 0.123183972 | 0.148706784 | -0.025522812 | 1  | 829 |
| chr22:49764996-49765272   | chr22 | 49764996  | 49765272  | 0.199218847 | 0.273953307 | -0.07473446  | 3  | 830 |
| chr9:139024317-139025832  | chr9  | 139024317 | 139025832 | 0.684828783 | 0.638254956 | 0.046573827  | 4  | 831 |
| chr4:122685861-122686565  | chr4  | 122685861 | 122686565 | 0.079930705 | 0.141942853 | -0.062012149 | 8  | 832 |
| chr2:11605744-11606385    | chr2  | 11605744  | 11606385  | 0.489365296 | 0.463929868 | 0.025435428  | 3  | 833 |
| chr9:139255524-139256012  | chr9  | 139255524 | 139256012 | 0.822307514 | 0.878126048 | -0.055818534 | 2  | 834 |
| chr1:110210582-110210956  | chr1  | 110210582 | 110210956 | 0.787711729 | 0.737896344 | 0.049815385  | 6  | 835 |
| chr5:175200316-175200555  | chr5  | 175200316 | 175200555 | 0.182529378 | 0.227353176 | -0.044823798 | 3  | 836 |
| chr19:1155021-1155305     | chr19 | 1155021   | 1155305   | 0.80825727  | 0.753191134 | 0.055066136  | 4  | 837 |
| chr8:1302768-1303403      | chr8  | 1302768   | 1303403   | 0.565946806 | 0.605809476 | -0.039862669 | 2  | 838 |
| chr10:21805880-21806630   | chr10 | 21805880  | 21806630  | 0.165911316 | 0.191274378 | -0.025363062 | 2  | 839 |
| chr9:86152354-86153777    | chr9  | 86152354  | 86153777  | 0.466132397 | 0.491492281 | -0.025359884 | 5  | 840 |
| chr19:1428804-1429303     | chr19 | 1428804   | 1429303   | 0.911268286 | 0.856933397 | 0.054334889  | 3  | 841 |
| chr1:110051955-110052505  | chr1  | 110051955 | 110052505 | 0.295743975 | 0.267296534 | 0.028447441  | 7  | 842 |
| chr6:50813315-50813699    | chr6  | 50813315  | 50813699  | 0.795409947 | 0.74487755  | 0.050532397  | 3  | 843 |
| chr19:11450017-11450414   | chr19 | 11450017  | 11450414  | 0.178942235 | 0.153609223 | 0.025333012  | 3  | 844 |
| chr10:61468611-61469999   | chr10 | 61468611  | 61469999  | 0.24221813  | 0.287904501 | -0.045686372 | 13 | 845 |
| chr19:53868811-53869485   | chr19 | 53868811  | 53869485  | 0.284411145 | 0.309728654 | -0.025317508 | 4  | 846 |
| chr19:22123653-22123886   | chr19 | 22123653  | 22123886  | 0.368774438 | 0.407501539 | -0.038727101 | 3  | 847 |
| chr3:80819488-80819788    | chr3  | 80819488  | 80819788  | 0.827839365 | 0.770538035 | 0.05730133   | 1  | 848 |
| chr16:1401335-1402348     | chr16 | 1401335   | 1402348   | 0.138463392 | 0.18237923  | -0.043915838 | 9  | 849 |
| chrX:150345616-150346577  | chrX  | 150345616 | 150346577 | 0.718933572 | 0.764358054 | -0.045424482 | 3  | 850 |
| chr19:45504866-45505299   | chr19 | 45504866  | 45505299  | 0.060500902 | 0.085716603 | -0.025215702 | 2  | 851 |
| chr4:46995129-46995872    | chr4  | 46995129  | 46995872  | 0.23412041  | 0.259319253 | -0.025198843 | 8  | 852 |
| chr2:80531368-80531719    | chr2  | 80531368  | 80531719  | 0.384723856 | 0.332038355 | 0.052685501  | 7  | 853 |
| chr10:105344174-105345039 | chr10 | 105344174 | 105345039 | 0.877429157 | 0.816490034 | 0.060939122  | 5  | 854 |
| chr7:50343758-50344519    | chr7  | 50343758  | 50344519  | 0.160036611 | 0.087212912 | 0.072823699  | 6  | 855 |
| chr20:43729516-43729791   | chr20 | 43729516  | 43729791  | 0.858985739 | 0.799731536 | 0.059254203  | 1  | 856 |
| chr19:15838997-15839277   | chr19 | 15838997  | 15839277  | 0.616144432 | 0.57348885  | 0.042655582  | 1  | 857 |
| chr9:133308594-133309448  | chr9  | 133308594 | 133309448 | 0.521624557 | 0.457615711 | 0.064008846  | 4  | 858 |
| chr19:46932069-46932349   | chr19 | 46932069  | 46932349  | 0.864189197 | 0.804008684 | 0.060180512  | 4  | 859 |
| chr9:132199362-132199984  | chr9  | 132199362 | 132199984 | 0.211662458 | 0.241046642 | -0.029384184 | 3  | 860 |
| chr6:37673309-37673774    | chr6  | 37673309  | 37673774  | 0.68801437  | 0.739060065 | -0.051045695 | 5  | 861 |
| chr21:22369424-22370582   | chr21 | 22369424  | 22370582  | 0.657475045 | 0.688026174 | -0.030551129 | 7  | 862 |
| chr1:186649311-186650081  | chr1  | 186649311 | 186650081 | 0.29903626  | 0.23942279  | 0.05961347   | 11 | 863 |
| chr21:38935855-38936546   | chr21 | 38935855  | 38936546  | 0.111152824 | 0.086103461 | 0.025049363  | 5  | 864 |
| chr8:143879595-143879806  | chr8  | 143879595 | 143879806 | 0.808077927 | 0.8675782   | -0.059500272 | 1  | 865 |
| chr16:89786838-89789089   | chr16 | 89786838  | 89789089  | 0.148354486 | 0.176974953 | -0.028620467 | 12 | 866 |
| chr7:155601176-155603235  | chr7  | 155601176 | 155603235 | 0.798003885 | 0.753416655 | 0.04458723   | 7  | 867 |
| chr19:51189825-51190109   | chr19 | 51189825  | 51190109  | 0.740463085 | 0.777305243 | -0.036842157 | 2  | 868 |
| chr14:93389246-93389899   | chr14 | 93389246  | 93389899  | 0.130325707 | 0.155238214 | -0.024912507 | 6  | 869 |
| chr7:63505978-63506298    | chr7  | 63505978  | 63506298  | 0.20020736  | 0.137902245 | 0.062305116  | 2  | 870 |
| chr8:80523976-80525765    | chr8  | 80523976  | 80525765  | 0.117906223 | 0.093014957 | 0.024891267  | 7  | 871 |
| chr17:80918219-80919258   | chr17 | 80918219  | 80919258  | 0.842873199 | 0.893448207 | -0.050575008 | 3  | 872 |
| chrX:107018607-107019611  | chrX  | 107018607 | 107019611 | 0.480747655 | 0.527024752 | -0.046277097 | 10 | 873 |

|                           |       |           |           |             |             |              |    |     |
|---------------------------|-------|-----------|-----------|-------------|-------------|--------------|----|-----|
| chr7:100875556-100876212  | chr7  | 100875556 | 100876212 | 0.799882229 | 0.761023065 | 0.038859165  | 3  | 874 |
| chr19:6024735-6024988     | chr19 | 6024735   | 6024988   | 0.894813958 | 0.960114921 | -0.065300963 | 1  | 875 |
| chr3:74663507-74664121    | chr3  | 74663507  | 74664121  | 0.418850524 | 0.356092897 | 0.062757627  | 6  | 876 |
| chrX:68384914-68385404    | chrX  | 68384914  | 68385404  | 0.501112349 | 0.525885065 | -0.024772716 | 4  | 877 |
| chr5:10307521-10307913    | chr5  | 10307521  | 10307913  | 0.14823386  | 0.051853568 | 0.096380292  | 4  | 878 |
| chr16:15489527-15490075   | chr16 | 15489527  | 15490075  | 0.854383736 | 0.797075573 | 0.057308163  | 6  | 879 |
| chr11:92930761-92931391   | chr11 | 92930761  | 92931391  | 0.107041989 | 0.131769719 | -0.024727729 | 8  | 880 |
| chr13:99228320-99229576   | chr13 | 99228320  | 99229576  | 0.067124263 | 0.091850379 | -0.024726116 | 5  | 881 |
| chr22:43506501-43507610   | chr22 | 43506501  | 43507610  | 0.181913636 | 0.206634943 | -0.024721307 | 12 | 882 |
| chrX:112083565-112084815  | chrX  | 112083565 | 112084815 | 0.367367753 | 0.398017492 | -0.030649739 | 8  | 883 |
| chr1:2435042-2435257      | chr1  | 2435042   | 2435257   | 0.914080323 | 0.858256149 | 0.055824173  | 2  | 884 |
| chr3:55522561-55522836    | chr3  | 55522561  | 55522836  | 0.190117947 | 0.124052168 | 0.066065779  | 5  | 885 |
| chr16:3989007-3989348     | chr16 | 3989007   | 3989348   | 0.165103015 | 0.195884889 | -0.030781874 | 3  | 886 |
| chr1:3527620-3528078      | chr1  | 3527620   | 3528078   | 0.143559179 | 0.111440397 | 0.032118783  | 5  | 887 |
| chrX:152909503-152910069  | chrX  | 152909503 | 152910069 | 0.56591654  | 0.610036397 | -0.044119858 | 4  | 888 |
| chr15:57598539-57599313   | chr15 | 57598539  | 57599313  | 0.326839102 | 0.356093649 | -0.029254547 | 7  | 889 |
| chr2:182521222-182521927  | chr2  | 182521222 | 182521927 | 0.171979345 | 0.222613447 | -0.050634102 | 9  | 890 |
| chr6:7051497-7052932      | chr6  | 7051497   | 7052932   | 0.526734125 | 0.551248577 | -0.024514452 | 4  | 891 |
| chrX:49687028-49687993    | chrX  | 49687028  | 49687993  | 0.331719969 | 0.363969028 | -0.032249059 | 13 | 892 |
| chr14:20106919-20107278   | chr14 | 20106919  | 20107278  | 0.654608862 | 0.701997037 | -0.047388176 | 1  | 893 |
| chr5:149865065-149866038  | chr5  | 149865065 | 149866038 | 0.106378083 | 0.130850139 | -0.024472056 | 4  | 894 |
| chrX:11682334-11684544    | chrX  | 11682334  | 11684544  | 0.29792516  | 0.357800224 | -0.059875064 | 11 | 895 |
| chr4:13548571-13549956    | chr4  | 13548571  | 13549956  | 0.307090618 | 0.331524318 | -0.024433699 | 10 | 896 |
| chr12:113917395-113918107 | chr12 | 113917395 | 113918107 | 0.568312061 | 0.646078697 | -0.077766636 | 6  | 897 |
| chrX:108976163-108976894  | chrX  | 108976163 | 108976894 | 0.489373752 | 0.526731446 | -0.037357694 | 9  | 898 |
| chr2:219156978-219157380  | chr2  | 219156978 | 219157380 | 0.093562554 | 0.118621976 | -0.025059421 | 7  | 899 |
| chr2:26915604-26916551    | chr2  | 26915604  | 26916551  | 0.252795936 | 0.221545229 | 0.031250706  | 4  | 900 |
| chr3:32021970-32023364    | chr3  | 32021970  | 32023364  | 0.178357318 | 0.202741334 | -0.024384016 | 9  | 901 |
| chr1:14924611-14925993    | chr1  | 14924611  | 14925993  | 0.094347223 | 0.118718079 | -0.024370855 | 10 | 902 |
| chr1:47082017-47082526    | chr1  | 47082017  | 47082526  | 0.617257242 | 0.546266236 | 0.070991006  | 5  | 903 |
| chr7:154861798-154862074  | chr7  | 154861798 | 154862074 | 0.063197989 | 0.087555252 | -0.024357262 | 2  | 904 |
| chr20:47934840-47935684   | chr20 | 47934840  | 47935684  | 0.377318312 | 0.491711196 | -0.114393648 | 3  | 905 |
| chr17:46673533-46674181   | chr17 | 46673533  | 46674181  | 0.522946597 | 0.561205619 | -0.038259021 | 3  | 906 |
| chr1:151881764-151882407  | chr1  | 151881764 | 151882407 | 0.135733617 | 0.086086156 | 0.049647461  | 7  | 907 |
| chr14:71108009-71109332   | chr14 | 71108009  | 71109332  | 0.118762741 | 0.14306633  | -0.024303589 | 5  | 908 |
| chrX:53710496-53711457    | chrX  | 53710496  | 53711457  | 0.41417144  | 0.460416353 | -0.046244913 | 4  | 909 |
| chr2:132767364-132767937  | chr2  | 132767364 | 132767937 | 0.605192141 | 0.629487388 | -0.024295247 | 3  | 910 |
| chr8:637394-638251        | chr8  | 637394    | 638251    | 0.11765116  | 0.143077166 | -0.025426005 | 3  | 911 |
| chr4:107147-107898        | chr4  | 107147    | 107898    | 0.772738804 | 0.707786472 | 0.064952332  | 3  | 912 |
| chr2:87088817-87089037    | chr2  | 87088817  | 87089037  | 0.835224403 | 0.764005844 | 0.071218559  | 3  | 913 |
| chr7:157695026-157695358  | chr7  | 157695026 | 157695358 | 0.704950179 | 0.750403367 | -0.045453188 | 3  | 914 |
| chr18:72123607-72124717   | chr18 | 72123607  | 72124717  | 0.316385674 | 0.340652146 | -0.024266472 | 6  | 915 |
| chr10:45496276-45496550   | chr10 | 45496276  | 45496550  | 0.749412071 | 0.682633183 | 0.066778888  | 4  | 916 |
| chr4:74734919-74735544    | chr4  | 74734919  | 74735544  | 0.140498832 | 0.164720517 | -0.024221686 | 7  | 917 |
| chr2:131113091-131114277  | chr2  | 131113091 | 131114277 | 0.148680353 | 0.173842493 | -0.02516214  | 6  | 918 |
| chr12:115130009-115130242 | chr12 | 115130009 | 115130242 | 0.834878389 | 0.779424047 | 0.055454342  | 1  | 919 |
| chr1:147993811-147994130  | chr1  | 147993811 | 147994130 | 0.307264355 | 0.283069164 | 0.024195192  | 2  | 920 |
| chr19:20149856-20150175   | chr19 | 20149856  | 20150175  | 0.206891304 | 0.139661966 | 0.067229339  | 2  | 921 |
| chr18:54788960-54789194   | chr18 | 54788960  | 54789194  | 0.884286282 | 0.832424552 | 0.051861731  | 3  | 922 |
| chr9:130674547-130674958  | chr9  | 130674547 | 130674958 | 0.86904926  | 0.930568241 | -0.061518981 | 1  | 923 |
| chr20:30160787-30161107   | chr20 | 30160787  | 30161107  | 0.154486506 | 0.130363902 | 0.024122604  | 2  | 924 |
| chr4:4119801-4120035      | chr4  | 4119801   | 4120035   | 0.756073779 | 0.809653222 | -0.053579443 | 1  | 925 |
| chrX:103401401-103401778  | chrX  | 103401401 | 103401778 | 0.275450407 | 0.306940323 | -0.031489917 | 4  | 926 |
| chr20:3758207-3759184     | chr20 | 3758207   | 3759184   | 0.733955727 | 0.688087376 | 0.045868351  | 4  | 927 |
| chr2:5836069-5837643      | chr2  | 5836069   | 5837643   | 0.395813263 | 0.419861052 | -0.02404779  | 10 | 928 |
| chr7:852961-853230        | chr7  | 852961    | 853230    | 0.367513668 | 0.406035296 | -0.038521628 | 3  | 929 |
| chr10:71211117-71211780   | chr10 | 71211117  | 71211780  | 0.108359546 | 0.133956767 | -0.025597221 | 7  | 930 |
| chr22:42353660-42353900   | chr22 | 42353660  | 42353900  | 0.531400954 | 0.569746317 | -0.038345363 | 2  | 931 |
| chr7:157369121-157369394  | chr7  | 157369121 | 157369394 | 0.860237129 | 0.806373793 | 0.053863335  | 3  | 932 |
| chr17:7754919-7755584     | chr17 | 7754919   | 7755584   | 0.779264337 | 0.741270518 | 0.03799382   | 3  | 933 |
| chr2:232545348-232546143  | chr2  | 232545348 | 232546143 | 0.459831829 | 0.491805348 | -0.031973519 | 3  | 934 |
| chr20:3451292-3452231     | chr20 | 3451292   | 3452231   | 0.089707302 | 0.065797759 | 0.023909543  | 9  | 935 |
| chrX:42637009-42637383    | chrX  | 42637009  | 42637383  | 0.795928925 | 0.855802905 | -0.05987398  | 2  | 936 |
| chrY:9303623-9303934      | chrY  | 9303623   | 9303934   | 0.372317342 | 0.40381458  | -0.031497238 | 1  | 937 |
| chr9:107526173-107526779  | chr9  | 107526173 | 107526779 | 0.211768571 | 0.235667307 | -0.023898736 | 5  | 938 |
| chr1:149871080-149871946  | chr1  | 149871080 | 149871946 | 0.561948586 | 0.603954576 | -0.04200599  | 7  | 939 |
| chr1:28286020-28286838    | chr1  | 28286020  | 28286838  | 0.133271275 | 0.157141162 | -0.023869887 | 8  | 940 |
| chr6:66804631-66804831    | chr6  | 66804631  | 66804831  | 0.247482977 | 0.223615581 | 0.023867395  | 3  | 941 |
| chrX:13707056-13707555    | chrX  | 13707056  | 13707555  | 0.085056915 | 0.108914992 | -0.023858077 | 4  | 942 |
| chr5:130330772-130331092  | chr5  | 130330772 | 130331092 | 0.596181227 | 0.652755401 | -0.056574174 | 4  | 943 |
| chr15:83620951-83621727   | chr15 | 83620951  | 83621727  | 0.106181153 | 0.13002449  | -0.023843337 | 6  | 944 |
| chr7:1452418-1452794      | chr7  | 1452418   | 1452794   | 0.143322169 | 0.119486288 | 0.023835882  | 2  | 945 |
| chrX:118012978-118013279  | chrX  | 118012978 | 118013279 | 0.805982354 | 0.753155866 | 0.052826489  | 1  | 946 |

|                           |       |           |           |             |             |              |    |      |
|---------------------------|-------|-----------|-----------|-------------|-------------|--------------|----|------|
| chr6:3156960-3157167      | chr6  | 3156960   | 3157167   | 0.17111912  | 0.124752763 | 0.046366357  | 3  | 947  |
| chr11:66079093-66080920   | chr11 | 66079093  | 66080920  | 0.264503012 | 0.28977177  | -0.025268758 | 8  | 948  |
| chr11:45921388-45922167   | chr11 | 45921388  | 45922167  | 0.304843474 | 0.354330118 | -0.049486644 | 4  | 949  |
| chr16:6068915-6070401     | chr16 | 6068915   | 6070401   | 0.425727807 | 0.385418362 | 0.040309445  | 9  | 950  |
| chr5:140620865-140621698  | chr5  | 140620865 | 140621698 | 0.721449173 | 0.690226802 | 0.031222371  | 4  | 951  |
| chr8:144240762-144242113  | chr8  | 144240762 | 144242113 | 0.576960169 | 0.553175375 | 0.023784793  | 8  | 952  |
| chr5:1277468-1277713      | chr5  | 1277468   | 1277713   | 0.790262051 | 0.74228258  | 0.047979471  | 2  | 953  |
| chrX:153978839-153979650  | chrX  | 153978839 | 153979650 | 0.593776562 | 0.628833247 | -0.035056685 | 11 | 954  |
| chrY:28555536-28555932    | chrY  | 28555536  | 28555932  | 0.44183887  | 0.411956282 | 0.029882588  | 1  | 955  |
| chr16:1543099-1544426     | chr16 | 1543099   | 1544426   | 0.097244725 | 0.073568796 | 0.023675929  | 8  | 956  |
| chr1:76081379-76082365    | chr1  | 76081379  | 76082365  | 0.096274388 | 0.121265476 | -0.024991088 | 5  | 957  |
| chr3:71114335-71114821    | chr3  | 71114335  | 71114821  | 0.126970338 | 0.150625825 | -0.023655488 | 2  | 958  |
| chr19:46105260-46105467   | chr19 | 46105260  | 46105467  | 0.086155086 | 0.159425255 | -0.073270169 | 2  | 959  |
| chr13:88329395-88329885   | chr13 | 88329395  | 88329885  | 0.567743701 | 0.644718123 | -0.076974423 | 3  | 960  |
| chr20:62669305-62670730   | chr20 | 62669305  | 62670730  | 0.476962454 | 0.556529371 | -0.079566917 | 4  | 961  |
| chr14:105864481-105865465 | chr14 | 105864481 | 105865465 | 0.367915771 | 0.344287731 | 0.02362804   | 6  | 962  |
| chr5:5303264-5303489      | chr5  | 5303264   | 5303489   | 0.701433378 | 0.743783718 | -0.042350341 | 4  | 963  |
| chr6:42419511-42419743    | chr6  | 42419511  | 42419743  | 0.08671889  | 0.110330276 | -0.023611386 | 1  | 964  |
| chr19:7985665-7985975     | chr19 | 7985665   | 7985975   | 0.124334345 | 0.14791814  | -0.023583795 | 1  | 965  |
| chr16:419861-420256       | chr16 | 419861    | 420256    | 0.4281237   | 0.459846374 | -0.031722674 | 4  | 966  |
| chr20:36034986-36035203   | chr20 | 36034986  | 36035203  | 0.088978853 | 0.065396214 | 0.02358264   | 1  | 967  |
| chr5:157002175-157003182  | chr5  | 157002175 | 157003182 | 0.112127344 | 0.135696161 | -0.023568818 | 8  | 968  |
| chrX:107069309-107070201  | chrX  | 107069309 | 107070201 | 0.498524172 | 0.531939583 | -0.033415411 | 5  | 969  |
| chr1:24739858-24740262    | chr1  | 24739858  | 24740262  | 0.107375738 | 0.131672371 | -0.024296633 | 4  | 970  |
| chr10:116163392-116164599 | chr10 | 116163392 | 116164599 | 0.383065336 | 0.351908818 | 0.031156519  | 4  | 971  |
| chr9:131580591-131581583  | chr9  | 131580591 | 131581583 | 0.210754364 | 0.245805719 | -0.035051355 | 2  | 972  |
| chr11:50238009-50238222   | chr11 | 50238009  | 50238222  | 0.4037563   | 0.461622262 | -0.057865962 | 3  | 973  |
| chr12:1771935-1772513     | chr12 | 1771935   | 1772513   | 0.713791936 | 0.760792696 | -0.04700076  | 3  | 974  |
| chr8:144371447-144372076  | chr8  | 144371447 | 144372076 | 0.308329419 | 0.364036295 | -0.055706875 | 4  | 975  |
| chr3:129345668-129346521  | chr3  | 129345668 | 129346521 | 0.737329265 | 0.762850176 | -0.025520911 | 4  | 976  |
| chr9:91995952-91996230    | chr9  | 91995952  | 91996230  | 0.937344467 | 0.866301441 | 0.071043026  | 1  | 977  |
| chrX:119077090-119077664  | chrX  | 119077090 | 119077664 | 0.397652967 | 0.437060703 | -0.039407736 | 5  | 978  |
| chr12:50297581-50297988   | chr12 | 50297581  | 50297988  | 0.748728706 | 0.797070818 | -0.048342112 | 6  | 979  |
| chr8:49890387-49890874    | chr8  | 49890387  | 49890874  | 0.914920339 | 0.864074027 | 0.050846312  | 4  | 980  |
| chr20:34204988-34205269   | chr20 | 34204988  | 34205269  | 0.59833263  | 0.551828275 | 0.046504355  | 4  | 981  |
| chr20:30135077-30135292   | chr20 | 30135077  | 30135292  | 0.720601879 | 0.647425904 | 0.073175975  | 7  | 982  |
| chr19:21657570-21658035   | chr19 | 21657570  | 21658035  | 0.751735794 | 0.680148872 | 0.071586922  | 5  | 983  |
| chr16:89988831-89989746   | chr16 | 89988831  | 89989746  | 0.079508123 | 0.119695091 | -0.040186967 | 4  | 984  |
| chr16:67204209-67204637   | chr16 | 67204209  | 67204637  | 0.220694243 | 0.091764528 | 0.128929715  | 3  | 985  |
| chr5:50678633-50679375    | chr5  | 50678633  | 50679375  | 0.409035978 | 0.37208261  | 0.036953367  | 13 | 986  |
| chr4:172733735-172735118  | chr4  | 172733735 | 172735118 | 0.275110226 | 0.251852859 | 0.023257367  | 11 | 987  |
| chr6:33288734-33289008    | chr6  | 33288734  | 33289008  | 0.676855568 | 0.733999456 | -0.057143888 | 16 | 988  |
| chr20:61660250-61660881   | chr20 | 61660250  | 61660881  | 0.926952283 | 0.87108887  | 0.055863413  | 2  | 989  |
| chr20:62406464-62407179   | chr20 | 62406464  | 62407179  | 0.689773012 | 0.649756934 | 0.040016078  | 4  | 990  |
| chrX:151649043-151649487  | chrX  | 151649043 | 151649487 | 0.710687167 | 0.66250805  | 0.048179117  | 2  | 991  |
| chr3:129062831-129063133  | chr3  | 129062831 | 129063133 | 0.872732138 | 0.818450318 | 0.05428182   | 3  | 992  |
| chr19:17982671-17983821   | chr19 | 17982671  | 17983821  | 0.409669902 | 0.385672469 | 0.023997434  | 10 | 993  |
| chr8:1308108-1308499      | chr8  | 1308108   | 1308499   | 0.841711329 | 0.894435144 | -0.052723815 | 2  | 994  |
| chr22:20286319-20287630   | chr22 | 20286319  | 20287630  | 0.354279025 | 0.305359241 | 0.048919784  | 3  | 995  |
| chr22:37252476-37252709   | chr22 | 37252476  | 37252709  | 0.099133098 | 0.075979504 | 0.023153594  | 3  | 996  |
| chr19:45975849-45976262   | chr19 | 45975849  | 45976262  | 0.749592685 | 0.7170016   | 0.032591085  | 4  | 997  |
| chr7:43945584-43946456    | chr7  | 43945584  | 43946456  | 0.150279812 | 0.174582826 | -0.024303014 | 5  | 998  |
| chr17:48350423-48350832   | chr17 | 48350423  | 48350832  | 0.18074006  | 0.15760709  | 0.023132971  | 5  | 999  |
| chr1:86621279-86622871    | chr1  | 86621279  | 86622871  | 0.399346366 | 0.422473837 | -0.02312747  | 10 | 1000 |



**Supplementary Table S4. List of the 1,000 top-ranked, differentially methylated promoters after TET triple knockdown.**

This table is related to Fig. 2D. "NA" : No gene symbol provided.

| gene_symbol | chromosome | start     | end       | beta.GFP_siRNA | beta.GFP_scramble | difference   | num.sites | rank |
|-------------|------------|-----------|-----------|----------------|-------------------|--------------|-----------|------|
| NA          | chr7       | 22700912  | 22702911  | 0.328906648    | 0.649237408       | -0.32033076  | 1         | 1    |
| NA          | chr1       | 149604140 | 149606139 | 0.361994384    | 0.160476523       | 0.201517861  | 1         | 2    |
| HAS3        | chr16      | 69137967  | 69139966  | 0.627405663    | 0.380628042       | 0.246777621  | 6         | 3    |
| NA          | chr16      | 13425941  | 13427940  | 0.105375209    | 0.314635919       | -0.20926071  | 1         | 4    |
| RARRES2P5   | chr16      | 34455920  | 34457919  | 0.451430795    | 0.730780484       | -0.279349689 | 2         | 5    |
| NA          | chr16      | 34426206  | 34428205  | 0.149149323    | 0.417859054       | -0.268709732 | 1         | 6    |
| NA          | chr7       | 10514708  | 10516707  | 0.323535343    | 0.535049195       | -0.211513852 | 1         | 7    |
| P4HA2       | chr5       | 131630509 | 131632508 | 0.522194038    | 0.326062153       | 0.196131886  | 2         | 8    |
| SMARCD3     | chr7       | 150974483 | 150976482 | 0.438274867    | 0.273492898       | 0.164781969  | 1         | 9    |
| NA          | chr12      | 58378045  | 58380044  | 0.281797659    | 0.458952958       | -0.177155299 | 1         | 10   |
| NA          | chr14      | 21341252  | 21343251  | 0.507626129    | 0.319862284       | 0.187763845  | 2         | 11   |
| NA          | chr2       | 56412406  | 56414405  | 0.562791463    | 0.380405634       | 0.182385828  | 5         | 12   |
| IRF5        | chr7       | 128576166 | 128578165 | 0.513060596    | 0.38025509        | 0.132805506  | 11        | 13   |
| WDR59       | chr16      | 75033572  | 75035571  | 0.490447068    | 0.341102533       | 0.149344534  | 4         | 14   |
| OXCT1       | chr5       | 41870122  | 41872121  | 0.55939244     | 0.409200929       | 0.150191511  | 11        | 15   |
| RNU6-835P   | chr14      | 88462293  | 88464292  | 0.670996225    | 0.452934671       | 0.218061554  | 1         | 16   |
| NA          | chr14      | 99727785  | 99729784  | 0.285944169    | 0.121990269       | 0.163953901  | 3         | 17   |
| NA          | chr10      | 124514710 | 124516709 | 0.257893313    | 0.428482085       | -0.170588772 | 3         | 18   |
| SPANXA1     | chrX       | 140672634 | 140674633 | 0.575277151    | 0.393644772       | 0.181632379  | 1         | 19   |
| NA          | chr11      | 114452475 | 114454474 | 0.389512687    | 0.559053912       | -0.169541225 | 1         | 20   |
| DOK7        | chr4       | 3463533   | 3465532   | 0.585459882    | 0.448477239       | 0.136982643  | 11        | 21   |
| NA          | chr10      | 73636614  | 73638613  | 0.423942645    | 0.296772894       | 0.127169751  | 1         | 22   |
| RARRES2P9   | chr16      | 34578431  | 34580430  | 0.265107525    | 0.398350781       | -0.133243257 | 2         | 23   |
| CMTM3       | chr16      | 66636277  | 66638276  | 0.255229166    | 0.137111242       | 0.118117924  | 3         | 24   |
| VCX3B       | chrX       | 8431371   | 8433370   | 0.491770209    | 0.69717796        | -0.205407751 | 2         | 25   |
| NA          | chr2       | 108158606 | 108160605 | 0.382850364    | 0.65764253        | -0.274792167 | 1         | 26   |
| CPT1A       | chr11      | 68611379  | 68613378  | 0.699526938    | 0.499549048       | 0.19997789   | 3         | 27   |
| NA          | chr5       | 55777274  | 55779273  | 0.217182552    | 0.101525449       | 0.115657103  | 2         | 28   |
| NA          | chr2       | 64870246  | 64872245  | 0.410731599    | 0.172339945       | 0.238391654  | 1         | 29   |
| SLC25A1P4   | chr16      | 34406187  | 34408186  | 0.522522481    | 0.659570616       | -0.137048135 | 5         | 30   |
| GXYLT2      | chr3       | 72935724  | 72937723  | 0.377215558    | 0.261845935       | 0.115369622  | 2         | 31   |
| KIAA1549    | chr7       | 138665565 | 138667564 | 0.50113987     | 0.386111498       | 0.115028372  | 4         | 32   |
| UBQLN1      | chr9       | 86322619  | 86324618  | 0.462660017    | 0.293654856       | 0.169005161  | 4         | 33   |
| ACSM1       | chr16      | 20709713  | 20711712  | 0.522226397    | 0.727018781       | -0.204792384 | 1         | 34   |
| NA          | chr3       | 55395358  | 55397357  | 0.389922839    | 0.712993671       | -0.323070832 | 1         | 35   |
| NA          | chr2       | 9281795   | 9283794   | 0.570223169    | 0.421532699       | 0.14869047   | 3         | 36   |
| HNRNPDP2    | chr6       | 65341076  | 65343075  | 0.826573871    | 0.584769795       | 0.241804076  | 1         | 37   |
| NA          | chr3       | 158519225 | 158521224 | 0.381127364    | 0.246022391       | 0.135104972  | 11        | 38   |
| WIBG        | chr12      | 56325903  | 56327902  | 0.818920765    | 0.61517116        | 0.203749605  | 4         | 39   |
| GGCT        | chr7       | 30590596  | 30592595  | 0.618579549    | 0.451710697       | 0.166868851  | 1         | 40   |
| NA          | chr7       | 30589898  | 30591897  | 0.618579549    | 0.451710697       | 0.166868851  | 1         | 41   |
| MIR4435-1HG | chr2       | 112252178 | 112254177 | 0.244189238    | 0.135228647       | 0.108960591  | 1         | 42   |
| NA          | chr2       | 112251889 | 112253888 | 0.244189238    | 0.135228647       | 0.108960591  | 1         | 43   |
| NA          | chr14      | 95651692  | 95653691  | 0.75745549     | 0.555590954       | 0.201864536  | 1         | 44   |
| OR2L3       | chr1       | 248222484 | 248224483 | 0.344214061    | 0.574729546       | -0.230515485 | 1         | 45   |
| NA          | chr5       | 163893909 | 163895908 | 0.284292505    | 0.457933817       | -0.173641312 | 2         | 46   |
| TYR         | chr11      | 88909120  | 88911119  | 0.49269879     | 0.668337144       | -0.175638354 | 1         | 47   |
| NA          | chr2       | 67312645  | 67314644  | 0.542273135    | 0.735225209       | -0.192952073 | 1         | 48   |
| NA          | chr4       | 92033442  | 92035441  | 0.50848416     | 0.785780897       | -0.277296737 | 1         | 49   |
| CCDC159     | chr19      | 11453860  | 11455859  | 0.387744276    | 0.495276936       | -0.10753266  | 2         | 50   |
| NA          | chr3       | 186648837 | 186650836 | 0.383216961    | 0.267149018       | 0.116067944  | 7         | 51   |
| NA          | chr19      | 46733146  | 46735145  | 0.541109742    | 0.725258697       | -0.184148954 | 2         | 52   |
| NA          | chr3       | 44040142  | 44042141  | 0.646426816    | 0.506015043       | 0.140411773  | 7         | 53   |
| MRPL36      | chr5       | 1800981   | 1802980   | 0.208262359    | 0.096767782       | 0.111494578  | 9         | 54   |
| OR4X2       | chr11      | 48265108  | 48267107  | 0.312089001    | 0.596018714       | -0.283929713 | 1         | 55   |
| NA          | chr5       | 50262343  | 50264342  | 0.559838123    | 0.438213561       | 0.121624562  | 6         | 56   |
| DECR1       | chr8       | 91012133  | 91014132  | 0.828245792    | 0.627839657       | 0.200406135  | 10        | 57   |
| KRTAP5-AS1  | chr11      | 1591083   | 1593082   | 0.670096951    | 0.516449576       | 0.153647375  | 3         | 58   |
| NA          | chr4       | 124924    | 126923    | 0.39504642     | 0.538414435       | -0.143368015 | 3         | 59   |
| C15orf62    | chr15      | 41060659  | 41062658  | 0.556317218    | 0.436813042       | 0.119504175  | 9         | 60   |
| USP4        | chr3       | 49377646  | 49379645  | 0.485335725    | 0.383528628       | 0.101807097  | 6         | 61   |
| NA          | chr14      | 105121625 | 105123624 | 0.615437941    | 0.40707029        | 0.208367651  | 1         | 62   |
| RN7SL444P   | chr1       | 151272940 | 151274939 | 0.430046993    | 0.263306587       | 0.166740405  | 1         | 63   |
| PLK5        | chr19      | 1522573   | 1524572   | 0.648136359    | 0.546834481       | 0.101301877  | 6         | 64   |
| TNRC6C-AS1  | chr17      | 76107381  | 76109380  | 0.415549476    | 0.547538734       | -0.131989257 | 1         | 65   |

|            |       |           |           |             |             |              |    |     |
|------------|-------|-----------|-----------|-------------|-------------|--------------|----|-----|
| HBE1       | chr11 | 5526348   | 5528347   | 0.582506524 | 0.764790266 | -0.182283742 | 2  | 66  |
| NA         | chr11 | 5526383   | 5528382   | 0.582506524 | 0.764790266 | -0.182283742 | 2  | 67  |
| GP2        | chr16 | 20338631  | 20340630  | 0.276190957 | 0.502201253 | -0.226010296 | 2  | 68  |
| NA         | chr8  | 65493946  | 65495945  | 0.45745742  | 0.303910015 | 0.153547405  | 3  | 69  |
| NA         | chr13 | 34250406  | 34252405  | 0.588035825 | 0.487373849 | 0.100661976  | 4  | 70  |
| NA         | chr16 | 67465095  | 67467094  | 0.546281606 | 0.445660618 | 0.100620988  | 3  | 71  |
| SERPINE2   | chr2  | 224903537 | 224905536 | 0.362477049 | 0.23963647  | 0.122840579  | 7  | 72  |
| CMPK2      | chr2  | 7006267   | 7008266   | 0.555783862 | 0.455510221 | 0.100273641  | 3  | 73  |
| NA         | chr1  | 209960539 | 209962538 | 0.528937423 | 0.692951118 | -0.164013694 | 1  | 74  |
| LRAT       | chr4  | 155546597 | 155548596 | 0.619540329 | 0.49856906  | 0.120971269  | 8  | 75  |
| NA         | chr7  | 138309425 | 138311424 | 0.78819028  | 0.603575529 | 0.184614751  | 1  | 76  |
| HIST1H3D   | chr6  | 26199022  | 26201021  | 0.49578106  | 0.394785591 | 0.100995469  | 12 | 77  |
| HIST1H2AD  | chr6  | 26198972  | 26200971  | 0.49578106  | 0.394785591 | 0.100995469  | 12 | 78  |
| OR9G1      | chr11 | 56466364  | 56468363  | 0.210253643 | 0.400065424 | -0.189811782 | 3  | 79  |
| NA         | chr18 | 20839819  | 20841818  | 0.623476336 | 0.471798961 | 0.151677375  | 1  | 80  |
| NA         | chr9  | 29826210  | 29828209  | 0.590302493 | 0.721791151 | -0.131488658 | 2  | 81  |
| NA         | chr2  | 28617040  | 28619039  | 0.669431971 | 0.5178609   | 0.151571072  | 3  | 82  |
| NA         | chr2  | 158296562 | 158298561 | 0.794614619 | 0.60979575  | 0.184818869  | 1  | 83  |
| CD274      | chr9  | 5449003   | 5451002   | 0.477537195 | 0.379600909 | 0.097936286  | 5  | 84  |
| NA         | chr2  | 162928266 | 162930265 | 0.7140489   | 0.58241457  | 0.13163433   | 3  | 85  |
| NA         | chr8  | 102218876 | 102220875 | 0.329487561 | 0.185543993 | 0.143943568  | 1  | 86  |
| NA         | chr8  | 22931502  | 22933501  | 0.679065214 | 0.527019642 | 0.152045572  | 1  | 87  |
| NA         | chr16 | 34442108  | 34444107  | 0.651659966 | 0.767310255 | -0.115650289 | 5  | 88  |
| NA         | chr2  | 149645852 | 149647851 | 0.543576137 | 0.422503831 | 0.121072306  | 2  | 89  |
| ADAMTSL1   | chr9  | 18472392  | 18474391  | 0.767833671 | 0.602492428 | 0.165341243  | 2  | 90  |
| SLC2A11    | chr22 | 24197390  | 24199389  | 0.631453903 | 0.495871    | 0.135582903  | 4  | 91  |
| OR2M4      | chr1  | 248400731 | 248402730 | 0.377800089 | 0.545018802 | -0.167218713 | 2  | 92  |
| SPINK2     | chr4  | 57687409  | 57689408  | 0.534520264 | 0.428129654 | 0.10639061   | 6  | 93  |
| NA         | chr17 | 43248452  | 43250451  | 0.647296617 | 0.505211514 | 0.142085103  | 1  | 94  |
| NA         | chr7  | 8300363   | 8302362   | 0.444705729 | 0.344518817 | 0.100186912  | 12 | 95  |
| NA         | chr7  | 8300394   | 8302393   | 0.444705729 | 0.344518817 | 0.100186912  | 12 | 96  |
| NA         | chr1  | 203121529 | 203123528 | 0.242840812 | 0.337112251 | -0.094271439 | 1  | 97  |
| KCNA4      | chr11 | 30038071  | 30040070  | 0.540792098 | 0.40787047  | 0.132921629  | 14 | 98  |
| CIRH1A     | chr16 | 69163694  | 69165693  | 0.654101875 | 0.5129905   | 0.141111375  | 1  | 99  |
| IRF6       | chr1  | 209978966 | 209980965 | 0.55948142  | 0.410976011 | 0.148505409  | 14 | 100 |
| AACSP1     | chr5  | 178244937 | 178246936 | 0.858017562 | 0.676037834 | 0.181979728  | 1  | 101 |
| NA         | chr5  | 141330484 | 141332483 | 0.175803089 | 0.268798683 | -0.092995594 | 1  | 102 |
| FBXO24     | chr7  | 100180105 | 100182104 | 0.555998273 | 0.460059451 | 0.095938822  | 3  | 103 |
| NA         | chr14 | 23024034  | 23026033  | 0.179717484 | 0.08747288  | 0.092244604  | 1  | 104 |
| HIST1H2BF  | chr6  | 26198248  | 26200247  | 0.482940758 | 0.383552185 | 0.099388573  | 11 | 105 |
| CLCF1      | chr11 | 67141149  | 67143148  | 0.568530164 | 0.476549692 | 0.091980471  | 13 | 106 |
| NA         | chr11 | 89786405  | 89788404  | 0.554663441 | 0.701336243 | -0.146672802 | 1  | 107 |
| ZFAND2A    | chr7  | 1199896   | 1201895   | 0.187060629 | 0.090665342 | 0.096395287  | 7  | 108 |
| CLIC3      | chr9  | 139890756 | 139892755 | 0.535314804 | 0.443565043 | 0.091749761  | 4  | 109 |
| COX20P2    | chr2  | 231820808 | 231822807 | 0.253266074 | 0.149507768 | 0.103758306  | 2  | 110 |
| HSPB8      | chr12 | 119614947 | 119616946 | 0.670403414 | 0.578887264 | 0.09151615   | 10 | 111 |
| OR2I1P     | chr6  | 29519496  | 29521495  | 0.624654396 | 0.507861937 | 0.116792459  | 21 | 112 |
| SSBP4      | chr19 | 18528174  | 18530173  | 0.739263057 | 0.601950141 | 0.137312916  | 3  | 113 |
| TRIM48     | chr11 | 55028158  | 55030157  | 0.667996041 | 0.834000183 | -0.166004142 | 2  | 114 |
| SULT1C4    | chr2  | 108992867 | 108994866 | 0.785331933 | 0.654312667 | 0.131019266  | 9  | 115 |
| HIST1H1PS1 | chr6  | 26194294  | 26196293  | 0.87834412  | 0.721146084 | 0.157198036  | 5  | 116 |
| NA         | chr5  | 50263994  | 50265993  | 0.613236477 | 0.500798135 | 0.112438343  | 10 | 117 |
| NA         | chr19 | 21769625  | 21771624  | 0.576546726 | 0.45923049  | 0.117316236  | 1  | 118 |
| NA         | chr9  | 100461016 | 100463015 | 0.685974907 | 0.859897409 | -0.173922502 | 1  | 119 |
| TRAV8-5    | chr14 | 22369757  | 22371756  | 0.296269163 | 0.445392079 | -0.149122916 | 2  | 120 |
| SOX30      | chr5  | 157097989 | 157099988 | 0.475740685 | 0.359511346 | 0.116229339  | 10 | 121 |
| NA         | chr1  | 247456637 | 247458636 | 0.655797384 | 0.821432422 | -0.165635038 | 1  | 122 |
| CDH8       | chr16 | 62070440  | 62072439  | 0.194005718 | 0.357636381 | -0.163630664 | 1  | 123 |
| BRWD1-IT2  | chr21 | 40686387  | 40688386  | 0.794562136 | 0.635134861 | 0.159427275  | 1  | 124 |
| ITGB5-AS1  | chr3  | 124498502 | 124500501 | 0.847591346 | 0.678011867 | 0.169579479  | 1  | 125 |
| C1QTNF4    | chr11 | 47615712  | 47617711  | 0.746164884 | 0.657096254 | 0.08906863   | 5  | 126 |
| RBP7       | chr1  | 10055764  | 10057763  | 0.678872194 | 0.553371812 | 0.125500382  | 11 | 127 |
| RIPPLY2    | chr6  | 84561485  | 84563484  | 0.467526817 | 0.36905679  | 0.098470027  | 12 | 128 |
| MEOX2      | chr7  | 15725938  | 15727937  | 0.655179402 | 0.448053774 | 0.207125628  | 13 | 129 |
| NA         | chr2  | 64368873  | 64370872  | 0.197389034 | 0.108283984 | 0.08910505   | 1  | 130 |
| GBP4       | chr1  | 89664116  | 89666115  | 0.561335539 | 0.423300005 | 0.138035534  | 7  | 131 |
| UBE2C      | chr20 | 44439715  | 44441714  | 0.565287326 | 0.464654285 | 0.100633041  | 18 | 132 |
| NA         | chr11 | 65557840  | 65559839  | 0.647691643 | 0.805824046 | -0.158132403 | 1  | 133 |

|              |       |           |           |             |             |              |    |     |
|--------------|-------|-----------|-----------|-------------|-------------|--------------|----|-----|
| ANO1         | chr11 | 69922908  | 69924907  | 0.491597839 | 0.387855037 | 0.103742801  | 11 | 134 |
| PDE1B        | chr12 | 54941634  | 54943633  | 0.601551733 | 0.513676434 | 0.087875299  | 7  | 135 |
| ATP2C2       | chr16 | 84400633  | 84402632  | 0.629911206 | 0.532787202 | 0.097124004  | 7  | 136 |
| ROBO1        | chr3  | 79816466  | 79818465  | 0.477161117 | 0.376733417 | 0.1004277    | 7  | 137 |
| WDR86        | chr7  | 151107314 | 151109313 | 0.481977442 | 0.39214589  | 0.089831553  | 5  | 138 |
| USB1         | chr16 | 58031950  | 58033949  | 0.827080679 | 0.682414038 | 0.144666641  | 4  | 139 |
| NA           | chr11 | 119241916 | 119243915 | 0.827439    | 0.668511883 | 0.158927117  | 1  | 140 |
| MYCT1        | chr6  | 153017530 | 153019529 | 0.80726857  | 0.652502804 | 0.154765766  | 1  | 141 |
| NA           | chr19 | 53638076  | 53640075  | 0.27780122  | 0.499971587 | -0.222170367 | 1  | 142 |
| FEZF1-AS1    | chr7  | 121942212 | 121944211 | 0.734542581 | 0.622731313 | 0.111811268  | 5  | 143 |
| PABPC4L      | chr4  | 135122404 | 135124403 | 0.486533711 | 0.384221196 | 0.102312515  | 5  | 144 |
| NA           | chr11 | 67140556  | 67142555  | 0.418740932 | 0.331928239 | 0.086812693  | 14 | 145 |
| ATP6V0CP3    | chr6  | 42693472  | 42695471  | 0.63368396  | 0.547014812 | 0.086669148  | 4  | 146 |
| NA           | chr2  | 206812315 | 206814314 | 0.541937444 | 0.438780436 | 0.103157009  | 1  | 147 |
| NA           | chr12 | 63753318  | 63755317  | 0.706695314 | 0.870975912 | -0.164280598 | 1  | 148 |
| NA           | chr1  | 156661290 | 156663289 | 0.525599535 | 0.419787144 | 0.105812391  | 1  | 149 |
| NA           | chr2  | 71291374  | 71293373  | 0.88969995  | 0.723263378 | 0.166436572  | 1  | 150 |
| NAGK         | chr2  | 71289974  | 71291973  | 0.88969995  | 0.723263378 | 0.166436572  | 1  | 151 |
| MTATP8P2     | chr2  | 88122961  | 88124960  | 0.408429503 | 0.322680122 | 0.085749381  | 1  | 152 |
| EEF1A1P25    | chr3  | 138542405 | 138544404 | 0.495042489 | 0.609339608 | -0.114297119 | 1  | 153 |
| MIR5684      | chr19 | 12896442  | 12898441  | 0.831038862 | 0.67625437  | 0.154784493  | 1  | 154 |
| ZNF597       | chr16 | 3493043   | 3495042   | 0.626807016 | 0.515406588 | 0.111400428  | 12 | 155 |
| CPAMD8       | chr19 | 17137126  | 17139125  | 0.648133945 | 0.547478028 | 0.100655917  | 9  | 156 |
| CPQ          | chr8  | 97655955  | 97657954  | 0.413416776 | 0.291645524 | 0.121771252  | 14 | 157 |
| NA           | chr12 | 52772744  | 52774743  | 0.526249235 | 0.646701517 | -0.120452282 | 1  | 158 |
| MIR4801      | chr4  | 37243114  | 37245113  | 0.24655939  | 0.415511659 | -0.168952269 | 3  | 159 |
| SPANXN5      | chrX  | 52826642  | 52828641  | 0.674702873 | 0.783832274 | -0.109129401 | 3  | 160 |
| NA           | chr7  | 15726503  | 15728502  | 0.718922114 | 0.535835821 | 0.183086294  | 6  | 161 |
| C5orf52      | chr5  | 157097061 | 157099060 | 0.385648699 | 0.273316279 | 0.11233242   | 10 | 162 |
| C1QTNF2      | chr5  | 159797149 | 159799148 | 0.656241271 | 0.571788004 | 0.084453267  | 12 | 163 |
| TTC39B       | chr9  | 15306859  | 15308858  | 0.545483773 | 0.453634655 | 0.091849118  | 2  | 164 |
| LINC00966    | chr8  | 65284385  | 65286384  | 0.620160283 | 0.4903983   | 0.129761982  | 10 | 165 |
| NA           | chr1  | 112530892 | 112532891 | 0.521711686 | 0.437476657 | 0.084235029  | 12 | 166 |
| NA           | chr5  | 74348169  | 74350168  | 0.551780996 | 0.456260243 | 0.095520753  | 7  | 167 |
| FBXO6        | chr1  | 11722681  | 11724680  | 0.617484229 | 0.520164505 | 0.097319724  | 8  | 168 |
| HNRNPH1      | chr5  | 179061286 | 179063285 | 0.823957091 | 0.674670835 | 0.149286256  | 1  | 169 |
| SLC37A3      | chr7  | 140103734 | 140105733 | 0.692199045 | 0.565785794 | 0.126413251  | 5  | 170 |
| NA           | chr9  | 132645950 | 132647949 | 0.515284753 | 0.431787436 | 0.083497317  | 3  | 171 |
| SEMA4C       | chr2  | 97535995  | 97537994  | 0.369894224 | 0.281387118 | 0.088507106  | 3  | 172 |
| B4GALT6      | chr18 | 29265300  | 29267299  | 0.451188089 | 0.343388048 | 0.107800041  | 3  | 173 |
| CAPN1        | chr11 | 64946537  | 64948536  | 0.770527591 | 0.631948906 | 0.138578685  | 1  | 174 |
| NA           | chr11 | 119579130 | 119581129 | 0.401550923 | 0.269107833 | 0.132443089  | 1  | 175 |
| NA           | chr1  | 11839177  | 11841176  | 0.873936065 | 0.717179839 | 0.156756226  | 1  | 176 |
| NA           | chr16 | 3413599   | 3415598   | 0.619771109 | 0.513572478 | 0.106198631  | 5  | 177 |
| CYP4F22      | chr19 | 15617804  | 15619803  | 0.61692204  | 0.533794616 | 0.083127424  | 7  | 178 |
| NA           | chr11 | 66762597  | 66764596  | 0.518378753 | 0.646017885 | -0.127639133 | 1  | 179 |
| MUM1L1       | chrX  | 105410798 | 105412797 | 0.218658938 | 0.314122614 | -0.095463676 | 1  | 180 |
| NA           | chr1  | 30181895  | 30183894  | 0.900668308 | 0.74032203  | 0.160346278  | 1  | 181 |
| ZNF253       | chr19 | 19975195  | 19977194  | 0.361553892 | 0.263629087 | 0.097924804  | 9  | 182 |
| RNA5SP127    | chr3  | 31268707  | 31270706  | 0.790324159 | 0.649536029 | 0.14078813   | 1  | 183 |
| GPSM1        | chr9  | 139220432 | 139222431 | 0.514221829 | 0.431462949 | 0.08275888   | 4  | 184 |
| DPY19L2P2    | chr7  | 102920358 | 102922357 | 0.583976333 | 0.48287203  | 0.101104303  | 13 | 185 |
| C9orf66      | chr9  | 215394    | 217393    | 0.751552611 | 0.618233782 | 0.133318828  | 1  | 186 |
| FBLIM1       | chr1  | 16081602  | 16083601  | 0.840783074 | 0.692675364 | 0.14810771   | 1  | 187 |
| NA           | chr7  | 57832406  | 57834405  | 0.424315658 | 0.562627347 | -0.138311689 | 1  | 188 |
| CYP4A22      | chr1  | 47601607  | 47603606  | 0.48491709  | 0.576056714 | -0.091139624 | 2  | 189 |
| TSPAN18      | chr11 | 44746515  | 44748514  | 0.562819949 | 0.461320167 | 0.101499782  | 2  | 190 |
| ZSCAN1       | chr19 | 58543900  | 58545899  | 0.81743212  | 0.696260055 | 0.121172065  | 11 | 191 |
| ICA1         | chr7  | 8301818   | 8303817   | 0.694179343 | 0.59908066  | 0.095098683  | 11 | 192 |
| LINC00574    | chr6  | 170188917 | 170190916 | 0.484665888 | 0.400651143 | 0.084014745  | 12 | 193 |
| SP9          | chr2  | 175198174 | 175200173 | 0.693262372 | 0.566333935 | 0.126928437  | 16 | 194 |
| TGFBR3L      | chr19 | 7979530   | 7981529   | 0.526641361 | 0.428056909 | 0.098584452  | 4  | 195 |
| SERPINB4     | chr18 | 61311033  | 61313032  | 0.364229852 | 0.445864279 | -0.081634426 | 2  | 196 |
| RNVU1-20     | chr1  | 149604417 | 149606416 | 0.294279084 | 0.21268307  | 0.081596014  | 2  | 197 |
| PPP1R26      | chr9  | 138369425 | 138371424 | 0.710964459 | 0.627063367 | 0.083901093  | 3  | 198 |
| PSMB10       | chr16 | 67970491  | 67972490  | 0.564527445 | 0.454788062 | 0.109739383  | 5  | 199 |
| ARHGAP31-AS1 | chr3  | 119041108 | 119043107 | 0.397865917 | 0.315253573 | 0.082612343  | 6  | 200 |
| TINCR        | chr19 | 5567546   | 5569545   | 0.524257329 | 0.440908699 | 0.08334863   | 7  | 201 |

|           |       |           |           |             |             |              |    |     |
|-----------|-------|-----------|-----------|-------------|-------------|--------------|----|-----|
| NA        | chr15 | 40379533  | 40381532  | 0.474760445 | 0.57433859  | -0.099578146 | 1  | 202 |
| DUSP26    | chr8  | 33457125  | 33459124  | 0.590337147 | 0.500434818 | 0.089902329  | 9  | 203 |
| NA        | chr5  | 27470899  | 27472898  | 0.371754863 | 0.515188382 | -0.14343352  | 3  | 204 |
| TIGD7     | chr16 | 3355230   | 3357229   | 0.71144019  | 0.588832172 | 0.122608018  | 7  | 205 |
| OR6Q1     | chr11 | 57796902  | 57798901  | 0.102419209 | 0.212024585 | -0.109605376 | 1  | 206 |
| NAA60     | chr16 | 3492111   | 3494110   | 0.645648898 | 0.545434584 | 0.100214314  | 12 | 207 |
| CUL1      | chr7  | 148393506 | 148395505 | 0.650269832 | 0.558397975 | 0.091871857  | 6  | 208 |
| TNFRSF11A | chr18 | 59991020  | 59993019  | 0.410409026 | 0.312986882 | 0.097422144  | 8  | 209 |
| NA        | chr17 | 27076598  | 27078597  | 0.258531558 | 0.402778464 | -0.144246906 | 1  | 210 |
| RGS21     | chr1  | 192284622 | 192286621 | 0.385533301 | 0.487657515 | -0.102124214 | 1  | 211 |
| LINC00152 | chr2  | 87753387  | 87755386  | 0.230185838 | 0.091484864 | 0.138700974  | 1  | 212 |
| MIR4277   | chr5  | 1708484   | 1710483   | 0.728100758 | 0.614101739 | 0.113999019  | 2  | 213 |
| NA        | chr10 | 119999576 | 120001575 | 0.076820725 | 0.156300728 | -0.079480002 | 6  | 214 |
| BEAN1     | chr16 | 66459700  | 66461699  | 0.394491538 | 0.305647477 | 0.08884406   | 5  | 215 |
| MIR4740   | chr17 | 79374079  | 79376078  | 0.839906888 | 0.720471437 | 0.119435452  | 7  | 216 |
| SUMO2P6   | chr5  | 173987279 | 173989278 | 0.755019311 | 0.627628364 | 0.127390947  | 1  | 217 |
| ZNF385D   | chr3  | 22414313  | 22416312  | 0.579357984 | 0.498551479 | 0.080806505  | 4  | 218 |
| TCN2      | chr22 | 31001325  | 31003324  | 0.667164665 | 0.555592345 | 0.11157232   | 9  | 219 |
| NA        | chr14 | 88626436  | 88628435  | 0.654204731 | 0.786794974 | -0.132590243 | 1  | 220 |
| DPPA4     | chr3  | 109055920 | 109057919 | 0.769710385 | 0.650663815 | 0.11904657   | 6  | 221 |
| OR13D1    | chr9  | 107455160 | 107457159 | 0.251024733 | 0.469486786 | -0.218462053 | 1  | 222 |
| ZNF846    | chr19 | 9903357   | 9905356   | 0.80330772  | 0.684301902 | 0.119005818  | 4  | 223 |
| NA        | chr19 | 49566016  | 49568015  | 0.865131223 | 0.724730775 | 0.140400448  | 2  | 224 |
| NA        | chr20 | 30618879  | 30620878  | 0.753798124 | 0.645294293 | 0.108503831  | 4  | 225 |
| TRBV6-1   | chr7  | 142026621 | 142028620 | 0.648395316 | 0.536044009 | 0.112351307  | 3  | 226 |
| OR5H14    | chr3  | 97866670  | 97868669  | 0.309457644 | 0.431463715 | -0.12200607  | 2  | 227 |
| CREBZF    | chr11 | 85393452  | 85395451  | 0.758418746 | 0.631887695 | 0.126531051  | 3  | 228 |
| RHOT1P3   | chr13 | 19411739  | 19413738  | 0.364821158 | 0.488487313 | -0.123666155 | 2  | 229 |
| NA        | chr11 | 117687658 | 117689657 | 0.62476198  | 0.510631852 | 0.114130128  | 3  | 230 |
| FHAD1     | chr1  | 15572268  | 15574267  | 0.592971288 | 0.512549938 | 0.08042135   | 10 | 231 |
| TJP1      | chr15 | 30260569  | 30262568  | 0.750386834 | 0.652746057 | 0.097640778  | 4  | 232 |
| PTGER2    | chr14 | 52779523  | 52781522  | 0.475589468 | 0.396739382 | 0.078850086  | 8  | 233 |
| B3GNT9    | chr16 | 67184618  | 67186617  | 0.827141451 | 0.688347305 | 0.138794145  | 7  | 234 |
| ATP2B2    | chr3  | 10749217  | 10751216  | 0.549705165 | 0.458421746 | 0.09128342   | 3  | 235 |
| NA        | chr4  | 34041016  | 34043015  | 0.365820136 | 0.444132575 | -0.078312439 | 1  | 236 |
| NA        | chr6  | 31681350  | 31683349  | 0.377400104 | 0.465441347 | -0.088041242 | 8  | 237 |
| LY6G6E    | chr6  | 31681343  | 31683342  | 0.377400104 | 0.465441347 | -0.088041242 | 8  | 238 |
| NA        | chr16 | 34375280  | 34377279  | 0.821615973 | 0.685294081 | 0.136321892  | 1  | 239 |
| NA        | chr8  | 61571879  | 61573878  | 0.878552875 | 0.732954947 | 0.145597928  | 1  | 240 |
| NA        | chr5  | 114936254 | 114938253 | 0.614438533 | 0.515569125 | 0.098869408  | 8  | 241 |
| NA        | chr7  | 88195097  | 88197096  | 0.320764027 | 0.56365034  | -0.242886313 | 1  | 242 |
| NA        | chr2  | 127782800 | 127784799 | 0.67738562  | 0.576557642 | 0.100827978  | 5  | 243 |
| ZNF619    | chr3  | 40517104  | 40519103  | 0.430482083 | 0.322281102 | 0.108200981  | 8  | 244 |
| MYH11     | chr16 | 15950391  | 15952390  | 0.644309746 | 0.52753219  | 0.116777556  | 7  | 245 |
| SLC19A3   | chr2  | 228582229 | 228584228 | 0.69150497  | 0.587995282 | 0.103509688  | 9  | 246 |
| NA        | chr1  | 41328086  | 41330085  | 0.711939675 | 0.59800183  | 0.113937845  | 8  | 247 |
| RN7SKP190 | chr16 | 82225896  | 82227895  | 0.859393837 | 0.718492561 | 0.140901276  | 1  | 248 |
| NA        | chr11 | 116705333 | 116707332 | 0.737747542 | 0.647585887 | 0.090161655  | 9  | 249 |
| PHLDB3    | chr19 | 44008588  | 44010587  | 0.578543602 | 0.501345342 | 0.077198261  | 10 | 250 |
| NA        | chr2  | 945461    | 947460    | 0.481047206 | 0.395890898 | 0.085156308  | 7  | 251 |
| NA        | chr8  | 23192184  | 23194183  | 0.818601365 | 0.684699443 | 0.133901922  | 1  | 252 |
| OR5AP2    | chr11 | 56409448  | 56411447  | 0.49495496  | 0.628155823 | -0.133200863 | 3  | 253 |
| ZFP42     | chr4  | 188915425 | 188917424 | 0.822915387 | 0.703350475 | 0.119564912  | 13 | 254 |
| NA        | chr17 | 14200418  | 14202417  | 0.709129087 | 0.632157809 | 0.076971278  | 7  | 255 |
| ZNF491    | chr19 | 11906982  | 11908981  | 0.563242467 | 0.472925194 | 0.090317273  | 2  | 256 |
| TAS2R39   | chr7  | 142879012 | 142881011 | 0.392656379 | 0.511757434 | -0.119101055 | 3  | 257 |
| ATL3      | chr11 | 63438894  | 63440893  | 0.803773081 | 0.681183825 | 0.122589257  | 11 | 258 |
| RNU1-1    | chr1  | 16840281  | 16842280  | 0.502400567 | 0.419996393 | 0.082404174  | 1  | 259 |
| NA        | chr1  | 16839640  | 16841639  | 0.502400567 | 0.419996393 | 0.082404174  | 1  | 260 |
| NA        | chr2  | 105318716 | 105320715 | 0.219085519 | 0.408417209 | -0.18933169  | 1  | 261 |
| RN7SL805P | chr17 | 61915843  | 61917842  | 0.511092418 | 0.393292289 | 0.117800129  | 1  | 262 |
| CTNNA1    | chr5  | 137945156 | 137947155 | 0.730714854 | 0.612269784 | 0.118445071  | 1  | 263 |
| EVA1C     | chr21 | 33782814  | 33784813  | 0.313103366 | 0.236787936 | 0.07631543   | 6  | 264 |
| PDE7A     | chr8  | 66754058  | 66756057  | 0.246596737 | 0.16594437  | 0.080652367  | 4  | 265 |
| OR51B2    | chr11 | 5345083   | 5347082   | 0.358724574 | 0.499582715 | -0.140858141 | 4  | 266 |
| NA        | chr22 | 40354901  | 40356900  | 0.832304777 | 0.697950685 | 0.134354092  | 1  | 267 |
| C9orf50   | chr9  | 132382556 | 132384555 | 0.705054506 | 0.618075806 | 0.0869787    | 5  | 268 |
| NA        | chr2  | 25598215  | 25600214  | 0.288087889 | 0.197743556 | 0.090344332  | 3  | 269 |

|            |       |           |           |             |             |              |    |     |
|------------|-------|-----------|-----------|-------------|-------------|--------------|----|-----|
| TUBBP5     | chr9  | 141043065 | 141045064 | 0.570007868 | 0.483770586 | 0.086237282  | 2  | 270 |
| COL15A1    | chr9  | 101703961 | 101705960 | 0.663011668 | 0.565392414 | 0.097619255  | 3  | 271 |
| LRRTM3     | chr10 | 68684264  | 68686263  | 0.336622666 | 0.261024055 | 0.075598611  | 6  | 272 |
| DENND2A    | chr7  | 140373294 | 140375293 | 0.679828043 | 0.580334152 | 0.099493891  | 2  | 273 |
| MYD88      | chr3  | 38178469  | 38180468  | 0.42813918  | 0.340470394 | 0.087668786  | 14 | 274 |
| PTPN5      | chr11 | 18813769  | 18815768  | 0.677148534 | 0.587360152 | 0.089788383  | 3  | 275 |
| ANKDD1B    | chr5  | 74905784  | 74907783  | 0.741809404 | 0.625120547 | 0.116688857  | 5  | 276 |
| NA         | chr3  | 102392258 | 102394257 | 0.826899187 | 0.695475739 | 0.131423448  | 1  | 277 |
| SNTG1      | chr8  | 50820849  | 50822848  | 0.747676465 | 0.627175876 | 0.120500589  | 6  | 278 |
| NA         | chr3  | 142677714 | 142679713 | 0.946134831 | 0.775439402 | 0.17069543   | 1  | 279 |
| NA         | chr10 | 112628001 | 112630000 | 0.734909155 | 0.618007353 | 0.116901802  | 1  | 280 |
| ZNF784     | chr19 | 56135468  | 56137467  | 0.217943996 | 0.14297058  | 0.074973416  | 9  | 281 |
| MNDA       | chr1  | 158799607 | 158801606 | 0.12210603  | 0.261374526 | -0.139268496 | 2  | 282 |
| NA         | chr11 | 89459922  | 89461921  | 0.571338297 | 0.679106241 | -0.107767945 | 1  | 283 |
| TRMT1      | chr19 | 13227882  | 13229881  | 0.244822944 | 0.158703658 | 0.086119287  | 5  | 284 |
| FBXL15     | chr10 | 104177446 | 104179445 | 0.826333787 | 0.70384321  | 0.122490577  | 9  | 285 |
| PAH        | chr12 | 103351689 | 103353688 | 0.677114043 | 0.580613605 | 0.096500437  | 12 | 286 |
| NA         | chr2  | 28618182  | 28620181  | 0.827841119 | 0.710808009 | 0.117033109  | 3  | 287 |
| ROM1       | chr11 | 62377694  | 62379693  | 0.58196778  | 0.504125846 | 0.077841934  | 2  | 288 |
| NFAT5      | chr16 | 69597497  | 69599496  | 0.410720624 | 0.301395554 | 0.10932507   | 5  | 289 |
| NA         | chr2  | 175189255 | 175191254 | 0.740561436 | 0.624910961 | 0.115650476  | 4  | 290 |
| NA         | chr9  | 15053555  | 15055554  | 0.518370401 | 0.431486574 | 0.086883827  | 1  | 291 |
| NA         | chr1  | 110437095 | 110439094 | 0.690114327 | 0.581166858 | 0.108947469  | 1  | 292 |
| STMN1P1    | chr12 | 31900532  | 31902531  | 0.084577645 | 0.215780999 | -0.131203354 | 1  | 293 |
| NA         | chr12 | 31900675  | 31902674  | 0.084577645 | 0.215780999 | -0.131203354 | 1  | 294 |
| TMEM161BP1 | chr10 | 37624843  | 37626842  | 0.203404285 | 0.129126154 | 0.074278131  | 1  | 295 |
| ITGAX      | chr16 | 31364955  | 31366954  | 0.485701264 | 0.398883653 | 0.086817611  | 5  | 296 |
| NA         | chr15 | 91381454  | 91383453  | 0.86937411  | 0.733088702 | 0.136285408  | 1  | 297 |
| ESRRG      | chr1  | 217310598 | 217312597 | 0.712165809 | 0.611109451 | 0.101056358  | 14 | 298 |
| SUZ12      | chr17 | 30262537  | 30264536  | 0.269812557 | 0.184574525 | 0.085238032  | 7  | 299 |
| NA         | chr19 | 49843366  | 49845365  | 0.633142554 | 0.53522244  | 0.097920114  | 3  | 300 |
| BIN2P1     | chr4  | 83194724  | 83196723  | 0.877045425 | 0.740057479 | 0.136987945  | 1  | 301 |
| RIT1       | chr1  | 155880696 | 155882695 | 0.316029316 | 0.242153975 | 0.073875341  | 7  | 302 |
| NA         | chr11 | 11590131  | 11592130  | 0.622545518 | 0.771457775 | -0.148912257 | 1  | 303 |
| ITGB2      | chr21 | 46351405  | 46353404  | 0.687054309 | 0.583286008 | 0.1037683    | 5  | 304 |
| NA         | chr12 | 52701656  | 52703655  | 0.671091041 | 0.573616202 | 0.097474839  | 6  | 305 |
| NA         | chr1  | 9747114   | 9749113   | 0.456522648 | 0.382797843 | 0.073724806  | 4  | 306 |
| NBL1       | chr1  | 19965548  | 19967547  | 0.614656299 | 0.51846753  | 0.096188769  | 1  | 307 |
| DSCAM      | chr21 | 42218566  | 42220565  | 0.662124053 | 0.576795187 | 0.085328866  | 10 | 308 |
| KCNJ12     | chr17 | 21278009  | 21280008  | 0.730580377 | 0.629427375 | 0.101153001  | 8  | 309 |
| RPP25      | chr15 | 75249306  | 75251305  | 0.730002383 | 0.64117055  | 0.088831833  | 11 | 310 |
| AS3MT      | chr10 | 104627773 | 104629772 | 0.559637999 | 0.444059838 | 0.115578161  | 11 | 311 |
| NA         | chr19 | 51296342  | 51298341  | 0.885608018 | 0.748283084 | 0.137324934  | 1  | 312 |
| LINC00693  | chr3  | 28614782  | 28616781  | 0.43981696  | 0.337047269 | 0.10276969   | 2  | 313 |
| ZFP2       | chr5  | 178321395 | 178323394 | 0.74422091  | 0.629997336 | 0.114223574  | 5  | 314 |
| RN7SL718P  | chr19 | 41696635  | 41698634  | 0.705530994 | 0.596119556 | 0.109411438  | 1  | 315 |
| OR13F1     | chr9  | 107264955 | 107266954 | 0.34882378  | 0.595845443 | -0.247021663 | 1  | 316 |
| NA         | chr2  | 12854041  | 12856040  | 0.803388442 | 0.679051809 | 0.124336633  | 1  | 317 |
| NA         | chr2  | 165695759 | 165697758 | 0.257808867 | 0.168412565 | 0.089396302  | 2  | 318 |
| CRK        | chr17 | 1365957   | 1367956   | 0.602656511 | 0.675773953 | -0.073117443 | 4  | 319 |
| ZIC1       | chr3  | 147109709 | 147111708 | 0.790760733 | 0.672525558 | 0.118235175  | 14 | 320 |
| KCNN2      | chr5  | 113695142 | 113697141 | 0.614696236 | 0.467168301 | 0.147527935  | 3  | 321 |
| NA         | chr4  | 185274631 | 185276630 | 0.689572867 | 0.466787289 | 0.222785578  | 1  | 322 |
| NA         | chr9  | 132198995 | 132200994 | 0.412017024 | 0.32956622  | 0.082450804  | 5  | 323 |
| RAB19      | chr7  | 140102343 | 140104342 | 0.752022673 | 0.640436874 | 0.111585798  | 9  | 324 |
| SOWAHB     | chr4  | 77818503  | 77820502  | 0.409968069 | 0.337064497 | 0.072903572  | 8  | 325 |
| SDCBPP2    | chr8  | 70853683  | 70855682  | 0.570522123 | 0.437003679 | 0.133518444  | 3  | 326 |
| PES1       | chr22 | 31002571  | 31004570  | 0.697084173 | 0.596074218 | 0.101009955  | 10 | 327 |
| NA         | chr7  | 38349484  | 38351483  | 0.710943387 | 0.586058769 | 0.124884618  | 7  | 328 |
| NA         | chr2  | 5831121   | 5833120   | 0.575286913 | 0.48362408  | 0.091662834  | 7  | 329 |
| KCTD13     | chr16 | 29937857  | 29939856  | 0.606163243 | 0.533397556 | 0.072765687  | 2  | 330 |
| LRRFIP1P1  | chr3  | 178978562 | 178980561 | 0.606043449 | 0.517194771 | 0.088848678  | 6  | 331 |
| MIR383     | chr8  | 14710520  | 14712519  | 0.436837762 | 0.546469589 | -0.109631827 | 2  | 332 |
| FAIM3      | chr1  | 207096093 | 207098092 | 0.80515206  | 0.694104282 | 0.111047778  | 3  | 333 |
| NA         | chr5  | 108165992 | 108167991 | 0.7180373   | 0.60801989  | 0.11001741   | 1  | 334 |
| AWAT1      | chrX  | 69453005  | 69455004  | 0.245195203 | 0.381472375 | -0.136277172 | 1  | 335 |
| MOB3C      | chr1  | 47082064  | 47084063  | 0.660457014 | 0.565470322 | 0.094986692  | 8  | 336 |
| RAB15      | chr14 | 65438995  | 65440994  | 0.41378104  | 0.341593854 | 0.072187186  | 5  | 337 |

|           |       |           |           |             |             |              |    |     |
|-----------|-------|-----------|-----------|-------------|-------------|--------------|----|-----|
| C19orf59  | chr19 | 7740014   | 7742013   | 0.810896382 | 0.698231153 | 0.112665229  | 6  | 338 |
| STX8      | chr17 | 9479409   | 9481408   | 0.445586743 | 0.373466555 | 0.072120188  | 9  | 339 |
| NA        | chr19 | 12163283  | 12165282  | 0.547226553 | 0.456171427 | 0.091055126  | 5  | 340 |
| NA        | chr11 | 320491    | 322490    | 0.646590765 | 0.574603592 | 0.071987173  | 7  | 341 |
| ELN       | chr7  | 73440619  | 73442618  | 0.770119664 | 0.664385552 | 0.105734112  | 8  | 342 |
| NA        | chr4  | 43898974  | 43900973  | 0.280994473 | 0.186467764 | 0.094526709  | 1  | 343 |
| KIRREL3   | chr11 | 126872856 | 126874855 | 0.452564718 | 0.381119629 | 0.071445089  | 8  | 344 |
| COX6B2    | chr19 | 55865683  | 55867682  | 0.462568207 | 0.377686146 | 0.084882061  | 13 | 345 |
| LINC00665 | chr19 | 36822121  | 36824120  | 0.402344161 | 0.330951752 | 0.071392409  | 6  | 346 |
| VAV3      | chr1  | 108507267 | 108509266 | 0.395960616 | 0.322278078 | 0.073682537  | 8  | 347 |
| DARS      | chr2  | 136743171 | 136745170 | 0.304477124 | 0.233106821 | 0.071370304  | 5  | 348 |
| STXBP6    | chr14 | 25519004  | 25521003  | 0.558074233 | 0.486705003 | 0.071369231  | 4  | 349 |
| NA        | chr12 | 66429515  | 66431514  | 0.179231008 | 0.300917912 | -0.121686904 | 1  | 350 |
| NA        | chr8  | 110984672 | 110986671 | 0.769384312 | 0.635890426 | 0.133493886  | 2  | 351 |
| HEPH      | chrX  | 65380891  | 65382890  | 0.171188065 | 0.286027581 | -0.114839516 | 3  | 352 |
| BCR       | chr22 | 23520391  | 23522390  | 0.66325217  | 0.568028542 | 0.095223628  | 4  | 353 |
| ASIC5     | chr4  | 156786926 | 156788925 | 0.667383714 | 0.546131314 | 0.1212524    | 3  | 354 |
| GOS2      | chr1  | 209847265 | 209849264 | 0.554268103 | 0.462037791 | 0.092230312  | 12 | 355 |
| NA        | chr4  | 124982117 | 124984116 | 0.343763984 | 0.510858084 | -0.167094101 | 1  | 356 |
| BRWD1-AS1 | chr21 | 40686133  | 40688132  | 0.435211757 | 0.350798188 | 0.084413569  | 2  | 357 |
| SMKR1     | chr7  | 129140820 | 129142819 | 0.3966098   | 0.318228246 | 0.078381554  | 3  | 358 |
| TRABD2A   | chr2  | 85133633  | 85135632  | 0.617582934 | 0.499018869 | 0.118564065  | 4  | 359 |
| NA        | chr7  | 3125556   | 3127555   | 0.939330095 | 0.799800009 | 0.139530086  | 1  | 360 |
| NA        | chr5  | 68797794  | 68799793  | 0.879809716 | 0.749067325 | 0.130742391  | 1  | 361 |
| MKNK1     | chr1  | 47082016  | 47084015  | 0.704038686 | 0.604552955 | 0.099485731  | 10 | 362 |
| FOXN2     | chr2  | 48540276  | 48542275  | 0.474699213 | 0.404034506 | 0.070664706  | 4  | 363 |
| NA        | chr3  | 110247930 | 110249929 | 0.241425732 | 0.465177958 | -0.223752226 | 1  | 364 |
| ISM2      | chr14 | 77964711  | 77966710  | 0.544820698 | 0.474368785 | 0.070451913  | 9  | 365 |
| LINC00682 | chr4  | 41884129  | 41886128  | 0.563010092 | 0.445423551 | 0.117586541  | 5  | 366 |
| NA        | chr1  | 144521471 | 144523470 | 0.833345027 | 0.709812117 | 0.12353291   | 1  | 367 |
| VSTM4     | chr10 | 50323055  | 50325054  | 0.435431304 | 0.36506841  | 0.070362894  | 8  | 368 |
| IFIT3     | chr10 | 91086151  | 91088150  | 0.549859902 | 0.453907664 | 0.095952239  | 3  | 369 |
| TSPY26P   | chr20 | 30777831  | 30779830  | 0.757697621 | 0.646978022 | 0.110719599  | 6  | 370 |
| GPR62     | chr3  | 51987830  | 51989829  | 0.824791469 | 0.706994498 | 0.117796971  | 4  | 371 |
| BEND4     | chr4  | 42154396  | 42156395  | 0.845211735 | 0.726569496 | 0.118642239  | 10 | 372 |
| NA        | chr5  | 17117296  | 17119295  | 0.438238362 | 0.319707149 | 0.118531214  | 1  | 373 |
| NA        | chr1  | 27850816  | 27852815  | 0.469009931 | 0.398861358 | 0.070148573  | 2  | 374 |
| PIGQ      | chr16 | 615495    | 617494    | 0.798147705 | 0.704065353 | 0.094082352  | 9  | 375 |
| NHLRC4    | chr16 | 615496    | 617495    | 0.798147705 | 0.704065353 | 0.094082352  | 9  | 376 |
| NA        | chr13 | 91144041  | 91146040  | 0.209306305 | 0.407435783 | -0.198129478 | 1  | 377 |
| NA        | chr18 | 59996545  | 59998544  | 0.732696566 | 0.62486981  | 0.107826756  | 1  | 378 |
| NA        | chr16 | 34378346  | 34380345  | 0.528083922 | 0.608906887 | -0.080822965 | 3  | 379 |
| ADCY1     | chr7  | 45612239  | 45614238  | 0.661388229 | 0.559384796 | 0.102003433  | 6  | 380 |
| DAOA      | chr13 | 106116716 | 106118715 | 0.235893106 | 0.377464012 | -0.141570906 | 3  | 381 |
| NTSR1     | chr20 | 61338689  | 61340688  | 0.573806207 | 0.493982435 | 0.079823773  | 8  | 382 |
| UGT2B10   | chr4  | 69680211  | 69682210  | 0.262270701 | 0.489231258 | -0.226960557 | 1  | 383 |
| LINC00544 | chr13 | 30508542  | 30510541  | 0.787196681 | 0.672042197 | 0.115154484  | 1  | 384 |
| C14orf39  | chr14 | 60981762  | 60983761  | 0.824879479 | 0.69874806  | 0.126131419  | 6  | 385 |
| TG        | chr8  | 133877703 | 133879702 | 0.72884745  | 0.808094335 | -0.079246885 | 5  | 386 |
| SCAMP5    | chr15 | 75248060  | 75250059  | 0.690253938 | 0.61140828  | 0.078845658  | 12 | 387 |
| NA        | chr6  | 100623585 | 100625584 | 0.588844146 | 0.701814378 | -0.112970232 | 1  | 388 |
| SEMA4G    | chr10 | 102727775 | 102729774 | 0.268808553 | 0.19953787  | 0.069270682  | 6  | 389 |
| MIR4783   | chr2  | 128180695 | 128182694 | 0.575003355 | 0.495885758 | 0.079117597  | 4  | 390 |
| MIR5193   | chr3  | 49843179  | 49845178  | 0.866245672 | 0.740076421 | 0.126169251  | 1  | 391 |
| APLNR     | chr11 | 57004210  | 57006209  | 0.736947836 | 0.659936148 | 0.077011688  | 5  | 392 |
| NA        | chr2  | 105759071 | 105761070 | 0.56100514  | 0.473145759 | 0.087859381  | 5  | 393 |
| CASD1     | chr7  | 94137031  | 94139030  | 0.568540587 | 0.47096995  | 0.097570637  | 4  | 394 |
| ABCF1     | chr6  | 30537653  | 30539652  | 0.243619881 | 0.17456394  | 0.069055941  | 31 | 395 |
| HIST1H2AE | chr6  | 26215665  | 26217664  | 0.780889133 | 0.673734819 | 0.107154314  | 11 | 396 |
| NA        | chr6  | 15244732  | 15246731  | 0.270164002 | 0.201144946 | 0.069019056  | 11 | 397 |
| REEP1     | chr2  | 86564707  | 86566706  | 0.559771169 | 0.486611027 | 0.073160142  | 12 | 398 |
| ACAA1     | chr3  | 38178234  | 38180233  | 0.380117371 | 0.31063283  | 0.069484541  | 13 | 399 |
| FZD10-AS1 | chr12 | 130646302 | 130648301 | 0.660758159 | 0.564640138 | 0.096118021  | 9  | 400 |
| NA        | chr19 | 29283279  | 29285278  | 0.607646389 | 0.538743639 | 0.06890275   | 5  | 401 |
| SH2D2A    | chr1  | 156786155 | 156788154 | 0.49369166  | 0.409404685 | 0.084286975  | 3  | 402 |
| ARL17B    | chr17 | 44438631  | 44440630  | 0.38265798  | 0.31386518  | 0.0687928    | 1  | 403 |
| NA        | chr20 | 30133807  | 30135806  | 0.76120756  | 0.65440099  | 0.10680657   | 11 | 404 |
| NA        | chr4  | 39974563  | 39976562  | 0.675503276 | 0.577558812 | 0.097944464  | 1  | 405 |

|            |       |           |           |             |             |              |    |     |
|------------|-------|-----------|-----------|-------------|-------------|--------------|----|-----|
| PABPC1P1   | chr4  | 39973564  | 39975563  | 0.675503276 | 0.577558812 | 0.097944464  | 1  | 406 |
| NA         | chr8  | 42408433  | 42410432  | 0.524017014 | 0.651708017 | -0.127691003 | 1  | 407 |
| ARMCX6     | chrX  | 100872492 | 100874491 | 0.243886855 | 0.312651082 | -0.068764228 | 8  | 408 |
| AGPAT2     | chr9  | 139581376 | 139583375 | 0.664437539 | 0.591623489 | 0.072814049  | 4  | 409 |
| RGS20      | chr8  | 54762868  | 54764867  | 0.403362682 | 0.489084344 | -0.085721661 | 2  | 410 |
| NA         | chr12 | 66275448  | 66277447  | 0.930006711 | 0.796128473 | 0.133878239  | 1  | 411 |
| SLC2A3     | chr12 | 8088372   | 8090371   | 0.672101794 | 0.576715748 | 0.095386046  | 7  | 412 |
| NA         | chr18 | 30348258  | 30350257  | 0.690032993 | 0.590968308 | 0.099064685  | 4  | 413 |
| GAD2       | chr10 | 26503736  | 26505735  | 0.590262485 | 0.50613491  | 0.084127575  | 13 | 414 |
| NCKAP5     | chr2  | 134325535 | 134327534 | 0.613226169 | 0.542312737 | 0.070913432  | 8  | 415 |
| STAB2      | chr12 | 103979551 | 103981550 | 0.729741642 | 0.830940436 | -0.101198795 | 6  | 416 |
| NA         | chr5  | 70739943  | 70741942  | 0.109526124 | 0.196377739 | -0.086851614 | 1  | 417 |
| SH3BP1     | chr22 | 38029161  | 38031160  | 0.851293691 | 0.729049308 | 0.122244383  | 1  | 418 |
| NA         | chr5  | 168438732 | 168440731 | 0.644099596 | 0.712422399 | -0.068322803 | 2  | 419 |
| NA         | chr14 | 29254494  | 29256493  | 0.850620782 | 0.73551055  | 0.115110232  | 7  | 420 |
| RHOA       | chr3  | 49449932  | 49451931  | 0.290448244 | 0.222135602 | 0.068312642  | 2  | 421 |
| NA         | chr11 | 68636632  | 68638631  | 0.876003205 | 0.751434189 | 0.124569016  | 2  | 422 |
| NA         | chr9  | 35644767  | 35646766  | 0.261578428 | 0.177166288 | 0.08441214   | 3  | 423 |
| SLC4A11    | chr20 | 3219388   | 3221387   | 0.649739466 | 0.560624839 | 0.089114628  | 7  | 424 |
| NA         | chr2  | 113932438 | 113934437 | 0.892961539 | 0.765167589 | 0.127793949  | 1  | 425 |
| SPATA12    | chr3  | 57092969  | 57094968  | 0.863053737 | 0.743584847 | 0.11946889   | 3  | 426 |
| FUOM       | chr10 | 135171030 | 135173029 | 0.707590778 | 0.634502828 | 0.07308795   | 12 | 427 |
| KCNS3      | chr2  | 18057614  | 18059613  | 0.760605843 | 0.631392762 | 0.12921308   | 9  | 428 |
| NA         | chr18 | 77904307  | 77906306  | 0.589375855 | 0.434718104 | 0.154657751  | 12 | 429 |
| PTPRN      | chr2  | 220173871 | 220175870 | 0.732883738 | 0.640449712 | 0.092434026  | 7  | 430 |
| TNFAIP8L2  | chr1  | 151127605 | 151129604 | 0.67362423  | 0.59779299  | 0.07583124   | 6  | 431 |
| SCNM1      | chr1  | 151127640 | 151129639 | 0.67362423  | 0.59779299  | 0.07583124   | 6  | 432 |
| NA         | chr9  | 139219141 | 139221140 | 0.887228872 | 0.760771514 | 0.126457358  | 1  | 433 |
| FHDC1      | chr4  | 153856004 | 153858003 | 0.640850951 | 0.547783178 | 0.093067773  | 5  | 434 |
| SGIP1      | chr1  | 66997566  | 66999565  | 0.823300341 | 0.706495554 | 0.116804788  | 7  | 435 |
| NA         | chr1  | 154378541 | 154380540 | 0.848549717 | 0.727856373 | 0.120693344  | 2  | 436 |
| NA         | chr17 | 30953257  | 30955256  | 0.700518945 | 0.5520263   | 0.148492645  | 1  | 437 |
| HOXA7      | chr7  | 27197056  | 27199055  | 0.864427146 | 0.746931751 | 0.117495395  | 12 | 438 |
| GPR19      | chr12 | 12848642  | 12850641  | 0.578890923 | 0.500525995 | 0.078364928  | 12 | 439 |
| NA         | chr2  | 171570578 | 171572577 | 0.397184217 | 0.298935493 | 0.098248724  | 16 | 440 |
| EBNA1BP2   | chr1  | 43736108  | 43738107  | 0.796505166 | 0.669322625 | 0.127182541  | 3  | 441 |
| SLC5A5     | chr19 | 17981282  | 17983281  | 0.487536056 | 0.420144256 | 0.067391801  | 12 | 442 |
| KLHL1      | chr13 | 70682092  | 70684091  | 0.661622568 | 0.565022879 | 0.096599689  | 10 | 443 |
| BOK-AS1    | chr2  | 242497893 | 242499892 | 0.747303206 | 0.668859082 | 0.078444124  | 11 | 444 |
| MEIS3      | chr19 | 47922281  | 47924280  | 0.623674562 | 0.55240642  | 0.071268141  | 6  | 445 |
| NA         | chr2  | 220968877 | 220970876 | 0.666027767 | 0.571636054 | 0.094391713  | 1  | 446 |
| TAC1       | chr7  | 97359720  | 97361719  | 0.751989538 | 0.606588251 | 0.145401287  | 10 | 447 |
| NA         | chr5  | 72508274  | 72510273  | 0.243339307 | 0.314903573 | -0.071564266 | 1  | 448 |
| NA         | chr8  | 91711810  | 91713809  | 0.709807769 | 0.795456165 | -0.085648396 | 2  | 449 |
| ACOT11     | chr1  | 55006430  | 55008429  | 0.179427136 | 0.112286456 | 0.06714068   | 9  | 450 |
| ACOT12     | chr5  | 80689499  | 80691498  | 0.835894941 | 0.71585213  | 0.120042811  | 5  | 451 |
| HIST2H3DP1 | chr1  | 120903175 | 120905174 | 0.593301653 | 0.509303427 | 0.083998226  | 1  | 452 |
| DBX1       | chr11 | 20181660  | 20183659  | 0.829175975 | 0.716952312 | 0.112223663  | 15 | 453 |
| CYP11B1    | chr8  | 143960763 | 143962762 | 0.516954597 | 0.583917842 | -0.066963245 | 6  | 454 |
| FAM150B    | chr2  | 288352    | 290351    | 0.921030362 | 0.79424609  | 0.126784272  | 8  | 455 |
| LINC00426  | chr13 | 30950783  | 30952782  | 0.820586356 | 0.705268467 | 0.115317889  | 1  | 456 |
| VAV3-AS1   | chr1  | 108505565 | 108507564 | 0.585968054 | 0.50551712  | 0.080450934  | 5  | 457 |
| NA         | chr1  | 190448009 | 190450008 | 0.413390033 | 0.343888807 | 0.069501225  | 1  | 458 |
| NA         | chr2  | 127781287 | 127783286 | 0.650625489 | 0.568418518 | 0.082206971  | 6  | 459 |
| MKLN1      | chr7  | 130793355 | 130795354 | 0.37600072  | 0.309140259 | 0.066860461  | 11 | 460 |
| OR51A2     | chr11 | 4976444   | 4978443   | 0.30591452  | 0.481496131 | -0.175581612 | 4  | 461 |
| PCDHGA12   | chr5  | 140808685 | 140810684 | 0.866696772 | 0.78162498  | 0.085071792  | 10 | 462 |
| SPARC      | chr5  | 151066227 | 151068226 | 0.797074967 | 0.695304447 | 0.101770519  | 9  | 463 |
| CD72       | chr9  | 35646308  | 35648307  | 0.21281394  | 0.146092428 | 0.066721512  | 4  | 464 |
| ATP2C1     | chr3  | 130567939 | 130569938 | 0.844065167 | 0.725919348 | 0.118145819  | 1  | 465 |
| TENC1      | chr12 | 53439253  | 53441252  | 0.466712937 | 0.400008477 | 0.06670446   | 4  | 466 |
| FAM184B    | chr4  | 17782636  | 17784635  | 0.68829443  | 0.576842181 | 0.111452249  | 13 | 467 |
| WDR86-AS1  | chr7  | 151104747 | 151106746 | 0.877723959 | 0.757634212 | 0.120089747  | 3  | 468 |
| PRTFDC1    | chr10 | 25241034  | 25243033  | 0.553929846 | 0.468700096 | 0.08522975   | 6  | 469 |
| TNFRSF9    | chr1  | 8000427   | 8002426   | 0.77499681  | 0.701372937 | 0.073623874  | 6  | 470 |
| VWC2       | chr7  | 49811757  | 49813756  | 0.791102615 | 0.642719122 | 0.148383492  | 9  | 471 |
| C2orf70    | chr2  | 26783950  | 26785949  | 0.809154881 | 0.699499893 | 0.109654988  | 14 | 472 |
| MIR1273F   | chr1  | 53392846  | 53394845  | 0.528023434 | 0.451673482 | 0.076349952  | 8  | 473 |

|             |       |           |           |             |             |              |    |     |
|-------------|-------|-----------|-----------|-------------|-------------|--------------|----|-----|
| ECHDC3      | chr10 | 11782865  | 11784864  | 0.827589522 | 0.722649721 | 0.1049398    | 10 | 474 |
| TRAF1       | chr9  | 123690952 | 123692951 | 0.722624749 | 0.653571561 | 0.069053188  | 4  | 475 |
| ACSL6       | chr5  | 131347437 | 131349436 | 0.484285908 | 0.412301578 | 0.07198433   | 8  | 476 |
| PAPOLA      | chr14 | 96966270  | 96968269  | 0.510477875 | 0.433942867 | 0.076535008  | 4  | 477 |
| HLF         | chr17 | 53340873  | 53342872  | 0.455954203 | 0.348352155 | 0.107602049  | 10 | 478 |
| HIST1H2BG   | chr6  | 26216373  | 26218372  | 0.791918998 | 0.688562291 | 0.103356707  | 12 | 479 |
| HSD17B14    | chr19 | 49339436  | 49341435  | 0.65528638  | 0.565398123 | 0.089888257  | 6  | 480 |
| SLC9A3P3    | chr10 | 51786624  | 51788623  | 0.697614121 | 0.810376597 | -0.112762476 | 1  | 481 |
| LINC00276   | chr2  | 14540588  | 14542587  | 0.362447607 | 0.470796469 | -0.108348862 | 2  | 482 |
| GPR114      | chr16 | 57574833  | 57576832  | 0.859534755 | 0.740370151 | 0.119164604  | 3  | 483 |
| NA          | chr16 | 86232020  | 86234019  | 0.864528042 | 0.755280944 | 0.109247098  | 7  | 484 |
| MIRLET7A2   | chr11 | 122016802 | 122018801 | 0.340589569 | 0.475375576 | -0.134786007 | 3  | 485 |
| NA          | chr1  | 145508004 | 145510003 | 0.667599309 | 0.574635522 | 0.092963788  | 1  | 486 |
| NA          | chr11 | 72064060  | 72066059  | 0.893210921 | 0.769380177 | 0.123830743  | 1  | 487 |
| EEF1G       | chr11 | 62341902  | 62343901  | 0.550547373 | 0.450469717 | 0.100077656  | 5  | 488 |
| HMGB3P1     | chr20 | 33421766  | 33423765  | 0.496773857 | 0.41051085  | 0.086263008  | 2  | 489 |
| RORA        | chr15 | 61521019  | 61523018  | 0.393440375 | 0.319684236 | 0.073756139  | 9  | 490 |
| CITED4      | chr1  | 41327519  | 41329518  | 0.684845832 | 0.590759156 | 0.094086676  | 11 | 491 |
| FAM19A1     | chr3  | 68051859  | 68053858  | 0.337819775 | 0.53697208  | -0.199152305 | 3  | 492 |
| DSCAML1     | chr11 | 117687741 | 117689740 | 0.700520113 | 0.604238142 | 0.096281971  | 4  | 493 |
| NA          | chr19 | 9902797   | 9904796   | 0.78444322  | 0.688054916 | 0.096388304  | 5  | 494 |
| KIAA1161    | chr9  | 34376352  | 34378351  | 0.391556577 | 0.32586042  | 0.065696157  | 5  | 495 |
| SLC16A11    | chr17 | 6946743   | 6948742   | 0.593937036 | 0.511532228 | 0.082404808  | 10 | 496 |
| THBD        | chr20 | 23029879  | 23031878  | 0.444307777 | 0.378614302 | 0.065693475  | 10 | 497 |
| OR13C8      | chr9  | 107329949 | 107331948 | 0.34724931  | 0.476119298 | -0.128869988 | 1  | 498 |
| SLFN12      | chr17 | 33759803  | 33761802  | 0.696884062 | 0.599985653 | 0.096898409  | 9  | 499 |
| YBX2        | chr17 | 7197435   | 7199434   | 0.804319646 | 0.715249324 | 0.089070322  | 16 | 500 |
| SLC38A7     | chr16 | 58718509  | 58720508  | 0.620223344 | 0.551035669 | 0.069187674  | 5  | 501 |
| MTFR1L      | chr1  | 26143631  | 26145630  | 0.905941165 | 0.79043577  | 0.115505395  | 3  | 502 |
| FAM122A     | chr9  | 71393464  | 71395463  | 0.298608774 | 0.225558804 | 0.073049971  | 5  | 503 |
| AK3         | chr9  | 4741544   | 4743543   | 0.854949474 | 0.737468485 | 0.117480989  | 1  | 504 |
| VN1R64P     | chr16 | 31556626  | 31558625  | 0.410838689 | 0.535144462 | -0.124305773 | 1  | 505 |
| BSCL2       | chr11 | 62476818  | 62478817  | 0.633728692 | 0.550383894 | 0.083344798  | 10 | 506 |
| VSNL1       | chr2  | 17718893  | 17720892  | 0.513479141 | 0.400904622 | 0.112574519  | 3  | 507 |
| NA          | chr16 | 14394645  | 14396644  | 0.296086148 | 0.216653231 | 0.079432917  | 4  | 508 |
| RIOK3       | chr18 | 21031287  | 21033286  | 0.446689741 | 0.38170748  | 0.064982261  | 7  | 509 |
| UBN1        | chr16 | 4895166   | 4897165   | 0.408232823 | 0.319907479 | 0.088325344  | 4  | 510 |
| RCOR3       | chr1  | 211430219 | 211432218 | 0.303963742 | 0.23903171  | 0.064932032  | 6  | 511 |
| NA          | chr7  | 27196463  | 27198462  | 0.8071175   | 0.694366351 | 0.112751149  | 15 | 512 |
| NA          | chr4  | 119511428 | 119513427 | 0.322766796 | 0.245968941 | 0.076797855  | 1  | 513 |
| BSG         | chr19 | 569797    | 571796    | 0.687604275 | 0.599849339 | 0.087754936  | 7  | 514 |
| NA          | chr1  | 33190339  | 33192338  | 0.871049805 | 0.751894445 | 0.11915536   | 1  | 515 |
| OR11H6      | chr14 | 20690291  | 20692290  | 0.33496463  | 0.460399783 | -0.125435153 | 1  | 516 |
| RN7SL136P   | chr1  | 35729584  | 35731583  | 0.449676355 | 0.323323002 | 0.126353353  | 1  | 517 |
| IL1R1       | chr2  | 102679504 | 102681503 | 0.849214558 | 0.733132023 | 0.116082536  | 1  | 518 |
| NA          | chr7  | 134832417 | 134834416 | 0.558441172 | 0.489066108 | 0.069375064  | 10 | 519 |
| PIK3CD      | chr1  | 9710290   | 9712289   | 0.659489333 | 0.572357303 | 0.087132029  | 9  | 520 |
| LRFN3       | chr19 | 36424760  | 36426759  | 0.539087613 | 0.652606427 | -0.113518814 | 1  | 521 |
| NA          | chr18 | 29264118  | 29266117  | 0.299255061 | 0.232264026 | 0.066991035  | 5  | 522 |
| C4orf50     | chr4  | 5991046   | 5993045   | 0.719515635 | 0.833124271 | -0.113608635 | 1  | 523 |
| SP5         | chr2  | 171570361 | 171572360 | 0.390084452 | 0.297887683 | 0.092196768  | 16 | 524 |
| PLCB2       | chr15 | 40599637  | 40601636  | 0.798628747 | 0.69781006  | 0.100818687  | 9  | 525 |
| SOGA2P1     | chr13 | 71496296  | 71498295  | 0.522453769 | 0.411737125 | 0.110716644  | 1  | 526 |
| P2RX7       | chr12 | 121569122 | 121571121 | 0.722695858 | 0.631884247 | 0.09081161   | 9  | 527 |
| EBF4        | chr20 | 2671980   | 2673979   | 0.704074678 | 0.63955867  | 0.064516008  | 4  | 528 |
| RNU2-37P    | chr3  | 127793593 | 127795592 | 0.835954089 | 0.71373792  | 0.122216168  | 5  | 529 |
| SS18        | chr18 | 23670682  | 23672681  | 0.194226183 | 0.121378905 | 0.072847278  | 8  | 530 |
| GPR26       | chr10 | 125424371 | 125426370 | 0.819624317 | 0.707770236 | 0.111854081  | 7  | 531 |
| TICAM1      | chr19 | 4831217   | 4833216   | 0.568669662 | 0.489600307 | 0.079069355  | 8  | 532 |
| FABP5       | chr8  | 82191098  | 82193097  | 0.686353548 | 0.576706914 | 0.109646634  | 11 | 533 |
| CRIP3       | chr6  | 43276036  | 43278035  | 0.544851152 | 0.467358312 | 0.07749284   | 9  | 534 |
| NA          | chr6  | 43276469  | 43278468  | 0.544851152 | 0.467358312 | 0.07749284   | 9  | 535 |
| GPR146      | chr7  | 1082712   | 1084711   | 0.550761561 | 0.482477452 | 0.068284109  | 8  | 536 |
| NA          | chr1  | 189743095 | 189745094 | 0.662732628 | 0.767004758 | -0.10427213  | 1  | 537 |
| NA          | chr7  | 97497979  | 97499978  | 0.76375418  | 0.883606467 | -0.119852287 | 1  | 538 |
| HIST1H2BPS2 | chr6  | 27831680  | 27833679  | 0.571673726 | 0.467207607 | 0.104466118  | 16 | 539 |
| MIR4736     | chr17 | 56412884  | 56414883  | 0.804280899 | 0.696013629 | 0.10826727   | 3  | 540 |
| ZNF442      | chr19 | 12476220  | 12478219  | 0.276141438 | 0.212020302 | 0.064121137  | 8  | 541 |



|             |       |           |           |             |             |              |    |     |
|-------------|-------|-----------|-----------|-------------|-------------|--------------|----|-----|
| NA          | chr2  | 67441952  | 67443951  | 0.825625427 | 0.723311863 | 0.102313564  | 3  | 542 |
| NA          | chr15 | 38364661  | 38366660  | 0.140678128 | 0.076602556 | 0.064075572  | 5  | 543 |
| SH3BGL3     | chr1  | 26604167  | 26606166  | 0.825647368 | 0.713705817 | 0.111941551  | 5  | 544 |
| DNAH8       | chr6  | 38681617  | 38683616  | 0.873111752 | 0.756698952 | 0.1164128    | 3  | 545 |
| ZNF85       | chr19 | 21104528  | 21106527  | 0.461073672 | 0.397022056 | 0.064051617  | 10 | 546 |
| RNU6-871P   | chr12 | 59844054  | 59846053  | 0.291540538 | 0.382261083 | -0.090720545 | 1  | 547 |
| NA          | chr5  | 9544812   | 9546811   | 0.379369345 | 0.305239557 | 0.074129788  | 9  | 548 |
| FBLL1       | chr5  | 167954621 | 167956620 | 0.310580992 | 0.246685951 | 0.063895041  | 6  | 549 |
| NA          | chr7  | 27232568  | 27234567  | 0.657479173 | 0.574747244 | 0.082731929  | 7  | 550 |
| MIR4710     | chr14 | 105143587 | 105145586 | 0.289720034 | 0.225846314 | 0.06387372   | 3  | 551 |
| UBQLNL      | chr11 | 5537436   | 5539435   | 0.339269032 | 0.499558035 | -0.160289004 | 3  | 552 |
| GRIK1       | chr21 | 31311852  | 31313851  | 0.442251367 | 0.34243244  | 0.099818927  | 6  | 553 |
| NA          | chr9  | 113255    | 115254    | 0.431910705 | 0.333786074 | 0.098124631  | 4  | 554 |
| NA          | chr1  | 21618283  | 21620282  | 0.871094337 | 0.753859558 | 0.117234779  | 1  | 555 |
| SNHG12      | chr1  | 28908996  | 28910995  | 0.86603745  | 0.749526834 | 0.116510615  | 1  | 556 |
| SYNE2       | chr14 | 64318183  | 64320182  | 0.371206964 | 0.302659164 | 0.068547799  | 8  | 557 |
| SEMA5A      | chr5  | 9545688   | 9547687   | 0.552169652 | 0.475939147 | 0.076230505  | 9  | 558 |
| MMD2        | chr7  | 4998345   | 5000344   | 0.51622224  | 0.447996729 | 0.068225512  | 6  | 559 |
| RNU7-20P    | chr7  | 148516604 | 148518603 | 0.665616918 | 0.562242113 | 0.103374805  | 1  | 560 |
| DMRT2       | chr9  | 1048854   | 1050853   | 0.919659811 | 0.796482643 | 0.123177168  | 2  | 561 |
| ZNF69       | chr19 | 11997099  | 11999098  | 0.78277629  | 0.683078214 | 0.099698076  | 13 | 562 |
| RAC2        | chr22 | 37639989  | 37641988  | 0.476900989 | 0.409832331 | 0.067068658  | 7  | 563 |
| FSTL3       | chr19 | 674892    | 676891    | 0.729987244 | 0.641328505 | 0.088658739  | 7  | 564 |
| NA          | chr11 | 126860848 | 126862847 | 0.923957459 | 0.800245151 | 0.123712308  | 1  | 565 |
| NA          | chr11 | 131121817 | 131123816 | 0.346459448 | 0.519141115 | -0.172681667 | 1  | 566 |
| HIST1H3H    | chr6  | 27776342  | 27778341  | 0.671441716 | 0.602204476 | 0.06923724   | 9  | 567 |
| DDAH1       | chr1  | 86043434  | 86045433  | 0.574663984 | 0.659115348 | -0.084451364 | 6  | 568 |
| MIR509-2    | chrX  | 146339869 | 146341868 | 0.343185798 | 0.230476963 | 0.112708836  | 1  | 569 |
| HOXC9       | chr12 | 54387179  | 54389178  | 0.571865768 | 0.479770692 | 0.092095076  | 9  | 570 |
| SHANK2      | chr11 | 70963124  | 70965123  | 0.487618973 | 0.406287686 | 0.081331287  | 5  | 571 |
| MANSC4      | chr12 | 27923710  | 27925709  | 0.735010759 | 0.665056624 | 0.069954135  | 4  | 572 |
| MLYCD       | chr16 | 83931231  | 83933230  | 0.180260281 | 0.117183029 | 0.063077253  | 3  | 573 |
| NA          | chr18 | 77551226  | 77553225  | 0.901222374 | 0.80140277  | 0.099819604  | 3  | 574 |
| NA          | chr14 | 100798627 | 100800626 | 0.916194583 | 0.794212033 | 0.12198255   | 1  | 575 |
| IFI44       | chr1  | 79113981  | 79115980  | 0.445539999 | 0.320774672 | 0.124765328  | 1  | 576 |
| NA          | chr16 | 2906399   | 2908398   | 0.813907346 | 0.709687802 | 0.104219544  | 8  | 577 |
| IGHVII-20-1 | chr14 | 106669452 | 106671451 | 0.824584284 | 0.714859768 | 0.109724516  | 1  | 578 |
| SLC15A4     | chr12 | 129308029 | 129310028 | 0.297607584 | 0.234668291 | 0.062939293  | 12 | 579 |
| TRIM38      | chr6  | 25961530  | 25963529  | 0.459042246 | 0.39189467  | 0.067147576  | 8  | 580 |
| RIC3        | chr11 | 8190103   | 8192102   | 0.570231409 | 0.488255777 | 0.081975632  | 11 | 581 |
| NA          | chr11 | 8189214   | 8191213   | 0.570231409 | 0.488255777 | 0.081975632  | 11 | 582 |
| GRM5        | chr11 | 88798614  | 88800613  | 0.178120336 | 0.301966008 | -0.123845672 | 3  | 583 |
| NA          | chr11 | 124627525 | 124629524 | 0.852279492 | 0.746405838 | 0.105873654  | 3  | 584 |
| NA          | chr17 | 27251793  | 27253792  | 0.866347771 | 0.762905898 | 0.103441874  | 3  | 585 |
| NA          | chr10 | 112402044 | 112404043 | 0.740384785 | 0.661810584 | 0.078574201  | 6  | 586 |
| NA          | chr17 | 31860280  | 31862279  | 0.468167677 | 0.542963605 | -0.074795928 | 3  | 587 |
| NA          | chr17 | 31859629  | 31861628  | 0.468167677 | 0.542963605 | -0.074795928 | 3  | 588 |
| RN7SKP89    | chr5  | 113587710 | 113589709 | 0.104974709 | 0.246773718 | -0.141799009 | 1  | 589 |
| IFI30       | chr19 | 18282472  | 18284471  | 0.595530509 | 0.511727157 | 0.083803352  | 6  | 590 |
| NOD2        | chr16 | 50726014  | 50728013  | 0.542618775 | 0.45822506  | 0.084393714  | 3  | 591 |
| NA          | chr8  | 127567641 | 127569640 | 0.731180753 | 0.614674439 | 0.116506314  | 5  | 592 |
| IMPA1P      | chr8  | 82542870  | 82544869  | 0.622529552 | 0.541018131 | 0.081511421  | 5  | 593 |
| RNU6-8      | chr14 | 32671976  | 32673975  | 0.131318335 | 0.068756447 | 0.062561888  | 4  | 594 |
| CSF1        | chr1  | 110451364 | 110453363 | 0.505059708 | 0.442539976 | 0.062519732  | 6  | 595 |
| FGF8        | chr10 | 103535355 | 103537354 | 0.681230133 | 0.582328672 | 0.098901461  | 7  | 596 |
| C11orf21    | chr11 | 2323780   | 2325779   | 0.826981867 | 0.71616187  | 0.110819997  | 4  | 597 |
| SAA3P       | chr11 | 18137180  | 18139179  | 0.767999947 | 0.863675453 | -0.095675506 | 3  | 598 |
| SEMA7A      | chr15 | 74726309  | 74728308  | 0.378570138 | 0.316157554 | 0.062412584  | 7  | 599 |
| C20orf112   | chr20 | 31172377  | 31174376  | 0.352390016 | 0.289988558 | 0.062401458  | 4  | 600 |
| NA          | chr16 | 28832855  | 28834854  | 0.243863813 | 0.181567839 | 0.062295974  | 6  | 601 |
| ATXN2L      | chr16 | 28832856  | 28834855  | 0.243863813 | 0.181567839 | 0.062295974  | 6  | 602 |
| DUSP9       | chrX  | 152906446 | 152908445 | 0.721788822 | 0.627965244 | 0.093823577  | 8  | 603 |
| MYEOV2      | chr2  | 241075725 | 241077724 | 0.689673042 | 0.627417844 | 0.062255198  | 27 | 604 |
| LRRC37A7P   | chr18 | 29302661  | 29304660  | 0.816792045 | 0.708947291 | 0.107844754  | 3  | 605 |
| NA          | chr12 | 58206777  | 58208776  | 0.827862851 | 0.718758801 | 0.10910405   | 1  | 606 |
| MIR3663     | chr10 | 118926786 | 118928785 | 0.690615198 | 0.604906384 | 0.085708814  | 5  | 607 |
| NA          | chr5  | 43040177  | 43042176  | 0.234043863 | 0.17198303  | 0.062060833  | 14 | 608 |
| MYO16       | chr13 | 109247000 | 109248999 | 0.327176447 | 0.441262441 | -0.114085994 | 5  | 609 |

|              |       |           |           |             |             |              |    |     |
|--------------|-------|-----------|-----------|-------------|-------------|--------------|----|-----|
| NA           | chr19 | 13907248  | 13909247  | 0.824778494 | 0.728529264 | 0.09624923   | 2  | 610 |
| HIST1H2AL    | chr6  | 27831534  | 27833533  | 0.56338411  | 0.461035861 | 0.10234825   | 15 | 611 |
| RPS29P22     | chr17 | 26442933  | 26444932  | 0.73650387  | 0.63954923  | 0.09695464   | 1  | 612 |
| NA           | chr19 | 52672911  | 52674910  | 0.412225463 | 0.350383192 | 0.061842271  | 4  | 613 |
| DUOX2        | chr15 | 45406043  | 45408042  | 0.852109372 | 0.728159668 | 0.123949703  | 14 | 614 |
| NA           | chr17 | 30845869  | 30847868  | 0.580791146 | 0.495901379 | 0.084889767  | 4  | 615 |
| FAM83F       | chr22 | 40389453  | 40391452  | 0.787928422 | 0.686330645 | 0.101597777  | 6  | 616 |
| RASAL1       | chr12 | 113573545 | 113575544 | 0.524882329 | 0.463196795 | 0.061685534  | 13 | 617 |
| TGIF2LY      | chrY  | 3445582   | 3447581   | 0.358422375 | 0.524527194 | -0.166104819 | 2  | 618 |
| PHACTR3      | chr20 | 58151064  | 58153063  | 0.836228784 | 0.73307816  | 0.103150625  | 4  | 619 |
| HSBP1L1      | chr18 | 77723061  | 77725060  | 0.592337516 | 0.512859842 | 0.079477673  | 8  | 620 |
| UCK1         | chr9  | 134406156 | 134408155 | 0.527104502 | 0.441412038 | 0.085692464  | 5  | 621 |
| HERC6        | chr4  | 89298391  | 89300390  | 0.496964916 | 0.435339991 | 0.061624925  | 9  | 622 |
| ANGPTL2      | chr9  | 129884663 | 129886662 | 0.699642865 | 0.578088323 | 0.121554542  | 3  | 623 |
| APCDD1L      | chr20 | 57089688  | 57091687  | 0.679736232 | 0.588993773 | 0.090742459  | 11 | 624 |
| TXNDC5       | chr6  | 7910548   | 7912547   | 0.254287315 | 0.192808387 | 0.061478928  | 5  | 625 |
| FAM213A      | chr10 | 82166085  | 82168084  | 0.505668066 | 0.418681586 | 0.08698648   | 7  | 626 |
| RHBDD1       | chr2  | 227698797 | 227700796 | 0.672721706 | 0.55703782  | 0.115683885  | 7  | 627 |
| NA           | chr12 | 102328494 | 102330493 | 0.774552062 | 0.673310228 | 0.101241834  | 1  | 628 |
| NA           | chr21 | 44034669  | 44036668  | 0.935597481 | 0.813600899 | 0.121996582  | 1  | 629 |
| NA           | chr2  | 5830751   | 5832750   | 0.561782999 | 0.490414606 | 0.071368393  | 5  | 630 |
| NA           | chr5  | 73832302  | 73834301  | 0.906687527 | 0.788575965 | 0.118111561  | 1  | 631 |
| SLC9A9       | chr3  | 143566874 | 143568873 | 0.548330419 | 0.486956358 | 0.061374061  | 2  | 632 |
| KCNA5        | chr12 | 5151585   | 5153584   | 0.745979332 | 0.652350456 | 0.093628876  | 6  | 633 |
| TBC1D14      | chr4  | 6909469   | 6911468   | 0.380121773 | 0.317420036 | 0.062701736  | 10 | 634 |
| ZNF423       | chr16 | 49891331  | 49893330  | 0.549812072 | 0.480076712 | 0.06973536   | 6  | 635 |
| NA           | chr4  | 186507563 | 186509562 | 0.723988646 | 0.65189716  | 0.072091487  | 3  | 636 |
| DPY19L2P4    | chr7  | 89747214  | 89749213  | 0.48141022  | 0.401390772 | 0.080019448  | 16 | 637 |
| IGSF10       | chr3  | 151175998 | 151177997 | 0.772646534 | 0.841206227 | -0.068559693 | 6  | 638 |
| LRRC16B      | chr14 | 24519706  | 24521705  | 0.405644617 | 0.344412819 | 0.061231799  | 5  | 639 |
| SNORA45      | chr11 | 8705486   | 8707485   | 0.445971878 | 0.514411831 | -0.068439952 | 4  | 640 |
| PCDHGB6      | chr5  | 140786270 | 140788269 | 0.815437264 | 0.721952013 | 0.093485251  | 6  | 641 |
| NA           | chr8  | 10585324  | 10587323  | 0.807047712 | 0.70727905  | 0.099768662  | 10 | 642 |
| NQO1         | chr16 | 69760355  | 69762354  | 0.180235294 | 0.114544544 | 0.065690751  | 8  | 643 |
| LIF          | chr22 | 30642341  | 30644340  | 0.410057682 | 0.349128994 | 0.060928688  | 7  | 644 |
| DNAH11       | chr7  | 21581333  | 21583332  | 0.706825857 | 0.621112378 | 0.085713479  | 9  | 645 |
| NA           | chr8  | 123705846 | 123707845 | 0.851007916 | 0.740730419 | 0.110277497  | 1  | 646 |
| NA           | chr3  | 150438124 | 150440123 | 0.468256588 | 0.275088914 | 0.193167675  | 1  | 647 |
| PDGFB        | chr22 | 39640257  | 39642256  | 0.399557896 | 0.335424285 | 0.06413361   | 11 | 648 |
| HIST1H2BO    | chr6  | 27859703  | 27861702  | 0.688471757 | 0.597640401 | 0.090831356  | 14 | 649 |
| C6orf226     | chr6  | 42858055  | 42860054  | 0.401636952 | 0.340965356 | 0.060671595  | 12 | 650 |
| COL4A2       | chr13 | 110956659 | 110958658 | 0.6866036   | 0.625162409 | 0.061441191  | 2  | 651 |
| NA           | chr14 | 88121139  | 88123138  | 0.232565407 | 0.412343106 | -0.179777699 | 2  | 652 |
| NA           | chr16 | 34596283  | 34598282  | 0.421126444 | 0.558302615 | -0.137176172 | 3  | 653 |
| ANKRD37      | chr4  | 186315675 | 186317674 | 0.275221288 | 0.205292364 | 0.069928925  | 4  | 654 |
| GRASP        | chr12 | 52399224  | 52401223  | 0.814340563 | 0.713102923 | 0.10123764   | 8  | 655 |
| SNORA35      | chrX  | 113863759 | 113865758 | 0.21424092  | 0.341499474 | -0.127258554 | 4  | 656 |
| RNF144A-AS1  | chr2  | 7058314   | 7060313   | 0.885930572 | 0.778635098 | 0.107295474  | 5  | 657 |
| BBOX1        | chr11 | 27060772  | 27062771  | 0.497218449 | 0.600940532 | -0.103722083 | 4  | 658 |
| ANKRD34C     | chr15 | 79573646  | 79575645  | 0.373560477 | 0.292030414 | 0.081530063  | 8  | 659 |
| OR5D13       | chr11 | 55539414  | 55541413  | 0.336437279 | 0.493387455 | -0.156950176 | 2  | 660 |
| VCX2         | chrX  | 8138809   | 8140808   | 0.68903071  | 0.796450067 | -0.107419357 | 3  | 661 |
| MDGA1        | chr6  | 37666583  | 37668582  | 0.68656496  | 0.626514995 | 0.060049965  | 4  | 662 |
| NA           | chr11 | 65221228  | 65223227  | 0.853531397 | 0.738313391 | 0.115218006  | 6  | 663 |
| NA           | chr2  | 177040945 | 177042944 | 0.688900241 | 0.607205094 | 0.081695146  | 3  | 664 |
| FAM163A      | chr1  | 179710798 | 179712797 | 0.659395505 | 0.581270662 | 0.078124843  | 13 | 665 |
| EMX1         | chr2  | 73141889  | 73143888  | 0.536091718 | 0.458115619 | 0.077976099  | 8  | 666 |
| DNTTIP2      | chr1  | 94344975  | 94346974  | 0.427816465 | 0.368023    | 0.059793465  | 4  | 667 |
| FAM5C        | chr1  | 190446260 | 190448259 | 0.377217396 | 0.292693179 | 0.084524217  | 8  | 668 |
| NA           | chr1  | 190446181 | 190448180 | 0.377217396 | 0.292693179 | 0.084524217  | 8  | 669 |
| LHX2         | chr9  | 126762449 | 126764448 | 0.457361195 | 0.387279701 | 0.070081494  | 2  | 670 |
| ATP5LP7      | chr17 | 40798352  | 40800351  | 0.816636211 | 0.712221698 | 0.104414514  | 2  | 671 |
| HMGB3P27     | chr17 | 40798696  | 40800695  | 0.816636211 | 0.712221698 | 0.104414514  | 2  | 672 |
| TNFRSF13C    | chr22 | 42322323  | 42324322  | 0.729585032 | 0.669867152 | 0.05971788   | 5  | 673 |
| BARHL2       | chr1  | 91182295  | 91184294  | 0.356592404 | 0.290342504 | 0.066249899  | 12 | 674 |
| C9orf135-AS1 | chr9  | 72435156  | 72437155  | 0.925987789 | 0.808794247 | 0.117193542  | 3  | 675 |
| C1orf194     | chr1  | 109655980 | 109657979 | 0.665744679 | 0.5829498   | 0.082794879  | 10 | 676 |
| C21orf128    | chr21 | 43528145  | 43530144  | 0.728185204 | 0.653210094 | 0.07497511   | 6  | 677 |

|             |       |           |           |             |             |              |    |     |
|-------------|-------|-----------|-----------|-------------|-------------|--------------|----|-----|
| SRP72       | chr4  | 57331581  | 57333580  | 0.137699012 | 0.078181015 | 0.059517997  | 6  | 678 |
| GPRASP1     | chrX  | 101904794 | 101906793 | 0.697014556 | 0.61164841  | 0.085366146  | 10 | 679 |
| NA          | chr9  | 133807738 | 133809737 | 0.858492876 | 0.749257351 | 0.109235525  | 1  | 680 |
| FOXB2       | chr9  | 79633071  | 79635070  | 0.496492999 | 0.417882129 | 0.07861087   | 6  | 681 |
| PLA2G7      | chr6  | 46702931  | 46704930  | 0.395161232 | 0.327823224 | 0.067338008  | 18 | 682 |
| TMEM140     | chr7  | 134831324 | 134833323 | 0.591179045 | 0.526016824 | 0.065162221  | 11 | 683 |
| FERMT2      | chr14 | 53418654  | 53420653  | 0.51307464  | 0.453695629 | 0.059379011  | 6  | 684 |
| MIR4513     | chr15 | 75080599  | 75082598  | 0.893157797 | 0.779721542 | 0.113436255  | 1  | 685 |
| NKX2-5      | chr5  | 172661861 | 172663860 | 0.663973084 | 0.591190446 | 0.072782639  | 12 | 686 |
| SYTL1       | chr1  | 27667013  | 27669012  | 0.454499494 | 0.389241763 | 0.065257732  | 8  | 687 |
| TRPM3       | chr9  | 74061321  | 74063320  | 0.149682228 | 0.210255206 | -0.060572978 | 4  | 688 |
| STRA13      | chr17 | 79981484  | 79983483  | 0.430842288 | 0.371587026 | 0.059255262  | 4  | 689 |
| CHODL-AS1   | chr21 | 19257426  | 19259425  | 0.194811444 | 0.355853066 | -0.161041622 | 2  | 690 |
| CLMP        | chr11 | 123065490 | 123067489 | 0.862352772 | 0.760257566 | 0.102095205  | 10 | 691 |
| PRTN3       | chr19 | 839463    | 841462    | 0.784804071 | 0.697067404 | 0.087736667  | 8  | 692 |
| SLC29A1     | chr6  | 44185742  | 44187741  | 0.698406307 | 0.609842736 | 0.088563571  | 12 | 693 |
| NA          | chr5  | 178509696 | 178511695 | 0.437053549 | 0.634838    | -0.19778445  | 1  | 694 |
| XKR5        | chr8  | 6692667   | 6694666   | 0.692061276 | 0.617442891 | 0.074618385  | 11 | 695 |
| RAP1GAP     | chr1  | 21995302  | 21997301  | 0.574433172 | 0.511544661 | 0.062888512  | 8  | 696 |
| NA          | chr16 | 59788253  | 59790252  | 0.439738772 | 0.553831864 | -0.114093091 | 8  | 697 |
| APOOP5      | chr16 | 59788431  | 59790430  | 0.439738772 | 0.553831864 | -0.114093091 | 8  | 698 |
| PPM1M       | chr3  | 52278341  | 52280340  | 0.743635832 | 0.654564422 | 0.08907141   | 11 | 699 |
| TCTEX1D4    | chr1  | 45272458  | 45274457  | 0.706661004 | 0.631827895 | 0.074833109  | 7  | 700 |
| IGFBPL1     | chr9  | 38423945  | 38425944  | 0.701290995 | 0.635324776 | 0.065966218  | 4  | 701 |
| UAP1L1      | chr9  | 139970453 | 139972452 | 0.595341965 | 0.527014559 | 0.068327406  | 4  | 702 |
| PCDH17      | chr13 | 58204444  | 58206443  | 0.320041519 | 0.247137122 | 0.072904397  | 6  | 703 |
| MIR3146     | chr7  | 19744560  | 19746559  | 0.722407804 | 0.627763387 | 0.094644417  | 1  | 704 |
| PHF19       | chr9  | 123639107 | 123641106 | 0.46393964  | 0.404970964 | 0.058968677  | 6  | 705 |
| OR14C36     | chr1  | 248510577 | 248512576 | 0.294308369 | 0.407864746 | -0.113556377 | 2  | 706 |
| HIST1H3J    | chr6  | 27860385  | 27862384  | 0.636108247 | 0.541434323 | 0.094673924  | 16 | 707 |
| NA          | chr3  | 47291617  | 47293616  | 0.497870502 | 0.316020002 | 0.1818505    | 1  | 708 |
| NA          | chr19 | 50193331  | 50195330  | 0.755188016 | 0.665497514 | 0.089690502  | 10 | 709 |
| NA          | chr16 | 34429533  | 34431532  | 0.494600595 | 0.597398217 | -0.102797622 | 7  | 710 |
| NA          | chr17 | 36862015  | 36864014  | 0.700469476 | 0.641665836 | 0.05880364   | 3  | 711 |
| NA          | chr13 | 76209631  | 76211630  | 0.54841996  | 0.483491483 | 0.064928476  | 4  | 712 |
| NA          | chr1  | 156614180 | 156616179 | 0.761724811 | 0.871514652 | -0.109789841 | 1  | 713 |
| CGA         | chr6  | 87804325  | 87806324  | 0.616854526 | 0.689773913 | -0.072919387 | 3  | 714 |
| NA          | chr3  | 16379315  | 16381314  | 0.867966457 | 0.758762499 | 0.109203958  | 1  | 715 |
| NA          | chr20 | 57463365  | 57465364  | 0.763775205 | 0.670357218 | 0.093417987  | 35 | 716 |
| HRC         | chr19 | 49658182  | 49660181  | 0.722656638 | 0.648153933 | 0.074502705  | 6  | 717 |
| HIST1H2APS4 | chr6  | 26272269  | 26274268  | 0.83915072  | 0.734265272 | 0.104885448  | 16 | 718 |
| RPL23AP78   | chr19 | 8839067   | 8841066   | 0.912923938 | 0.802704088 | 0.11021985   | 2  | 719 |
| CEACAM18    | chr19 | 51978338  | 51980337  | 0.491517358 | 0.608166186 | -0.116648828 | 4  | 720 |
| NA          | chr11 | 35989727  | 35991726  | 0.86504701  | 0.756451378 | 0.108595632  | 1  | 721 |
| TMEM154     | chr4  | 153600818 | 153602817 | 0.63761152  | 0.539353702 | 0.098257818  | 9  | 722 |
| LINC00460   | chr13 | 107027411 | 107029410 | 0.801933354 | 0.729169492 | 0.072763862  | 7  | 723 |
| ATP1A3      | chr19 | 42501150  | 42503149  | 0.158174373 | 0.099734727 | 0.058439646  | 4  | 724 |
| ARHGAP20    | chr11 | 110583413 | 110585412 | 0.448770897 | 0.373070857 | 0.07570004   | 11 | 725 |
| NA          | chr8  | 28196273  | 28198272  | 0.906573685 | 0.793151325 | 0.11342236   | 1  | 726 |
| NA          | chr19 | 21646211  | 21648210  | 0.822779855 | 0.703577279 | 0.119202576  | 5  | 727 |
| ASB2        | chr14 | 94442638  | 94444637  | 0.898273618 | 0.789217943 | 0.109055675  | 4  | 728 |
| C3orf14     | chr3  | 62303148  | 62305147  | 0.610148273 | 0.549805634 | 0.060342638  | 9  | 729 |
| NA          | chr5  | 33969468  | 33971467  | 0.751843909 | 0.588815051 | 0.163028858  | 1  | 730 |
| NA          | chr1  | 161008253 | 161010252 | 0.81938534  | 0.724780077 | 0.094605263  | 14 | 731 |
| TSTD1       | chr1  | 161008281 | 161010280 | 0.81938534  | 0.724780077 | 0.094605263  | 14 | 732 |
| NA          | chr7  | 155173271 | 155175270 | 0.852415962 | 0.750450941 | 0.101965021  | 7  | 733 |
| ZNF525      | chr19 | 53867446  | 53869445  | 0.4885563   | 0.419768115 | 0.068788185  | 5  | 734 |
| OR5T1       | chr11 | 56041529  | 56043528  | 0.31749569  | 0.445008557 | -0.127512867 | 2  | 735 |
| NA          | chr2  | 19673711  | 19675710  | 0.877362954 | 0.767853943 | 0.10950901   | 1  | 736 |
| APCDD1L-AS1 | chr20 | 57088935  | 57090934  | 0.68966349  | 0.60264039  | 0.0870231    | 12 | 737 |
| NMD3        | chr3  | 160820984 | 160822983 | 0.638357033 | 0.545114331 | 0.093242702  | 8  | 738 |
| NA          | chr6  | 43191099  | 43193098  | 0.82326547  | 0.720537451 | 0.102728019  | 1  | 739 |
| NA          | chr8  | 95651196  | 95653195  | 0.865463256 | 0.746235427 | 0.119227829  | 8  | 740 |
| NA          | chr22 | 30640484  | 30642483  | 0.438321501 | 0.51700121  | -0.078679709 | 1  | 741 |
| NA          | chr17 | 33867317  | 33869316  | 0.934614418 | 0.81835724  | 0.116257178  | 1  | 742 |
| INO80E      | chr16 | 30005115  | 30007114  | 0.481173959 | 0.423191084 | 0.057982876  | 5  | 743 |
| NDUFAF3     | chr3  | 49056392  | 49058391  | 0.336543815 | 0.278571663 | 0.057972152  | 13 | 744 |
| HIST1H4L    | chr6  | 27840790  | 27842789  | 0.879130304 | 0.770587392 | 0.108542912  | 16 | 745 |

|             |       |           |           |             |             |              |    |     |
|-------------|-------|-----------|-----------|-------------|-------------|--------------|----|-----|
| ARHGEF40    | chr14 | 21536929  | 21538928  | 0.404678445 | 0.338127973 | 0.066550472  | 7  | 746 |
| HIST1H2BI   | chr6  | 26271644  | 26273643  | 0.852658346 | 0.748939748 | 0.103718598  | 21 | 747 |
| CCNO        | chr5  | 54529009  | 54531008  | 0.411787261 | 0.353893663 | 0.057893599  | 14 | 748 |
| OR4N5       | chr14 | 20610395  | 20612394  | 0.623432894 | 0.521664332 | 0.101768562  | 3  | 749 |
| NDUFS6      | chr5  | 1800014   | 1802013   | 0.132961182 | 0.075080753 | 0.057880428  | 18 | 750 |
| SLCO1B1     | chr12 | 21282636  | 21284635  | 0.323586136 | 0.403832565 | -0.080246429 | 1  | 751 |
| CPT1C       | chr19 | 50192655  | 50194654  | 0.746883735 | 0.659474604 | 0.087409131  | 10 | 752 |
| CFLAR       | chr2  | 201979327 | 201981326 | 0.377265894 | 0.314168913 | 0.063096981  | 10 | 753 |
| C10orf131   | chr10 | 97665860  | 97667859  | 0.227875461 | 0.166227122 | 0.061648339  | 11 | 754 |
| NA          | chr16 | 86468991  | 86470990  | 0.886224644 | 0.776264895 | 0.109959749  | 1  | 755 |
| OXTR        | chr3  | 8810815   | 8812814   | 0.608844142 | 0.55115628  | 0.057687862  | 8  | 756 |
| NA          | chr3  | 50193019  | 50195018  | 0.787927064 | 0.706638734 | 0.081288331  | 3  | 757 |
| NA          | chr15 | 25275520  | 25277519  | 0.345697056 | 0.451701597 | -0.106004541 | 1  | 758 |
| RARRES2P8   | chr16 | 34777517  | 34779516  | 0.656201286 | 0.723182213 | -0.066980927 | 4  | 759 |
| SIGIRR      | chr11 | 416956    | 418955    | 0.731520609 | 0.647822376 | 0.083698234  | 8  | 760 |
| GSN-AS1     | chr9  | 124047309 | 124049308 | 0.90361946  | 0.791881582 | 0.111737878  | 1  | 761 |
| LCE1C       | chr1  | 152778608 | 152780607 | 0.216369138 | 0.323895891 | -0.107526752 | 2  | 762 |
| TENM1       | chrX  | 124097167 | 124099166 | 0.403575134 | 0.492379484 | -0.08880435  | 2  | 763 |
| WWC3        | chrX  | 9982102   | 9984101   | 0.88860573  | 0.780811492 | 0.107794238  | 4  | 764 |
| ARL11       | chr13 | 50200935  | 50202934  | 0.760869342 | 0.678440505 | 0.082428837  | 8  | 765 |
| NA          | chr7  | 57687491  | 57689490  | 0.339752544 | 0.500752088 | -0.160999545 | 1  | 766 |
| LINC00391   | chr13 | 95354617  | 95356616  | 0.888800874 | 0.780518792 | 0.108282082  | 7  | 767 |
| ADAMTS9-AS2 | chr3  | 64669085  | 64671084  | 0.799293164 | 0.718034891 | 0.081258273  | 8  | 768 |
| NA          | chr18 | 43606772  | 43608771  | 0.721439586 | 0.626721446 | 0.094718139  | 4  | 769 |
| CD200R1     | chr3  | 112693470 | 112695469 | 0.843180299 | 0.756584395 | 0.086595903  | 4  | 770 |
| IRX6        | chr16 | 55356172  | 55358171  | 0.439715437 | 0.382383022 | 0.057332415  | 4  | 771 |
| MIR516B1    | chr19 | 54238599  | 54240598  | 0.525668022 | 0.604845877 | -0.079177855 | 4  | 772 |
| NA          | chr6  | 31407944  | 31409943  | 0.340236141 | 0.282942001 | 0.05729414   | 14 | 773 |
| KLHL14      | chr18 | 30352526  | 30354525  | 0.740830882 | 0.646694494 | 0.094136389  | 10 | 774 |
| OR6K6       | chr1  | 158723010 | 158725009 | 0.290003181 | 0.464919232 | -0.174916051 | 4  | 775 |
| NA          | chr7  | 130794436 | 130796435 | 0.329766384 | 0.272474509 | 0.057291875  | 10 | 776 |
| CYP24A1     | chr20 | 52790013  | 52792012  | 0.415116012 | 0.358029457 | 0.057086555  | 9  | 777 |
| NA          | chr11 | 121297626 | 121299625 | 0.643682584 | 0.586598868 | 0.057083716  | 5  | 778 |
| CD27-AS1    | chr12 | 6560234   | 6562233   | 0.833802529 | 0.735114814 | 0.098687715  | 10 | 779 |
| PRRX1       | chr1  | 170630369 | 170632368 | 0.918464679 | 0.806022151 | 0.112442528  | 8  | 780 |
| CHPT1       | chr12 | 102089225 | 102091224 | 0.307812588 | 0.250811796 | 0.057000792  | 4  | 781 |
| NA          | chr12 | 132145641 | 132147640 | 0.848152943 | 0.744339078 | 0.103813865  | 2  | 782 |
| NA          | chr17 | 1991475   | 1993474   | 0.873984301 | 0.766690535 | 0.107293765  | 1  | 783 |
| BAALC       | chr8  | 104151438 | 104153437 | 0.614802471 | 0.535285937 | 0.079516534  | 6  | 784 |
| COL24A1     | chr1  | 86622127  | 86624126  | 0.280860128 | 0.223935361 | 0.056924767  | 7  | 785 |
| NA          | chr4  | 162298605 | 162300604 | 0.273332184 | 0.365140418 | -0.091808234 | 1  | 786 |
| PHBP1       | chr6  | 150362182 | 150364181 | 0.50016056  | 0.570558801 | -0.070398241 | 1  | 787 |
| KANK3       | chr19 | 8407647   | 8409646   | 0.627384879 | 0.554295622 | 0.073089257  | 12 | 788 |
| ABCA5       | chr17 | 67322886  | 67324885  | 0.484148288 | 0.407632989 | 0.0765153    | 8  | 789 |
| PRSS22      | chr16 | 2907672   | 2909671   | 0.738778467 | 0.648075245 | 0.090703222  | 11 | 790 |
| C19orf35    | chr19 | 2281682   | 2283681   | 0.768849617 | 0.683459234 | 0.085390383  | 9  | 791 |
| MEIS1-AS2   | chr2  | 66666945  | 66668944  | 0.857129498 | 0.738216616 | 0.118912882  | 11 | 792 |
| ZFH3        | chr16 | 73093098  | 73095097  | 0.411500412 | 0.277632888 | 0.133867524  | 2  | 793 |
| NA          | chr16 | 73092869  | 73094868  | 0.411500412 | 0.277632888 | 0.133867524  | 2  | 794 |
| ZNF75A      | chr16 | 3353906   | 3355905   | 0.759327096 | 0.670980354 | 0.088346743  | 6  | 795 |
| MPP2        | chr17 | 41986569  | 41988568  | 0.63296893  | 0.550253415 | 0.082715515  | 1  | 796 |
| IL10RB-AS1  | chr21 | 34638066  | 34640065  | 0.390395485 | 0.333190235 | 0.05720525   | 11 | 797 |
| IL10RB      | chr21 | 34637163  | 34639162  | 0.390395485 | 0.333190235 | 0.05720525   | 11 | 798 |
| FLG         | chr1  | 152297180 | 152299179 | 0.595176912 | 0.683108323 | -0.087931411 | 4  | 799 |
| BIN1        | chr2  | 127864432 | 127866431 | 0.344240884 | 0.271898373 | 0.072342511  | 10 | 800 |
| EPPIN-WFDC6 | chr20 | 44175566  | 44177565  | 0.518393411 | 0.652768249 | -0.134374838 | 5  | 801 |
| EPPIN       | chr20 | 44175892  | 44177891  | 0.518393411 | 0.652768249 | -0.134374838 | 5  | 802 |
| HLA-AS1     | chr1  | 221052983 | 221054982 | 0.522319356 | 0.449045659 | 0.073273697  | 11 | 803 |
| NA          | chr4  | 90756059  | 90758058  | 0.580006217 | 0.482387462 | 0.097618755  | 9  | 804 |
| NA          | chr17 | 37235818  | 37237817  | 0.423732825 | 0.510554634 | -0.086821808 | 1  | 805 |
| NA          | chr9  | 137417528 | 137419527 | 0.297481656 | 0.422880713 | -0.125399057 | 1  | 806 |
| GABRA5      | chr15 | 27110010  | 27112009  | 0.843310284 | 0.747816054 | 0.09549423   | 20 | 807 |
| NA          | chr12 | 291066    | 293065    | 0.402495498 | 0.458915858 | -0.05642036  | 1  | 808 |
| NA          | chr5  | 43017031  | 43019030  | 0.293204695 | 0.236876762 | 0.056327933  | 8  | 809 |
| NA          | chr11 | 118285192 | 118287191 | 0.892821896 | 0.784273762 | 0.108548134  | 1  | 810 |
| GJA1        | chr6  | 121755338 | 121757337 | 0.620167037 | 0.705760464 | -0.085593427 | 2  | 811 |
| NA          | chr15 | 29032845  | 29034844  | 0.67595179  | 0.597042235 | 0.078909555  | 7  | 812 |
| ACSS1       | chr20 | 25039117  | 25041116  | 0.747666978 | 0.669892131 | 0.077774847  | 10 | 813 |

|            |       |           |           |             |             |              |    |     |
|------------|-------|-----------|-----------|-------------|-------------|--------------|----|-----|
| MIR10A     | chr17 | 46659122  | 46661121  | 0.75984787  | 0.672129871 | 0.087717999  | 6  | 814 |
| SNTG2      | chr2  | 945054    | 947053    | 0.396130098 | 0.333066595 | 0.063063503  | 7  | 815 |
| BCRP8      | chr22 | 23521966  | 23523965  | 0.37102087  | 0.314767821 | 0.05625305   | 11 | 816 |
| CTNNA3     | chr10 | 69455428  | 69457427  | 0.720198288 | 0.606769024 | 0.113429264  | 4  | 817 |
| GOLM1      | chr9  | 88714589  | 88716588  | 0.888664833 | 0.783582851 | 0.105081981  | 3  | 818 |
| OR10S1     | chr11 | 123847989 | 123849988 | 0.373039724 | 0.55883977  | -0.185800046 | 2  | 819 |
| NA         | chr11 | 58825633  | 58827632  | 0.539486436 | 0.477128383 | 0.062358053  | 6  | 820 |
| ZNF843     | chr16 | 31453847  | 31455846  | 0.220234804 | 0.164111266 | 0.056123537  | 6  | 821 |
| PRR5       | chr22 | 45063093  | 45065092  | 0.374086272 | 0.303497811 | 0.070588461  | 6  | 822 |
| NA         | chrX  | 95592412  | 95594411  | 0.13211549  | 0.271813504 | -0.139698014 | 2  | 823 |
| NA         | chr16 | 1763710   | 1765709   | 0.866550947 | 0.769428409 | 0.097122538  | 3  | 824 |
| NA         | chr3  | 108895713 | 108897712 | 0.75383697  | 0.659154002 | 0.094682968  | 3  | 825 |
| LINC00488  | chr3  | 108895512 | 108897511 | 0.75383697  | 0.659154002 | 0.094682968  | 3  | 826 |
| NA         | chr7  | 132854773 | 132856772 | 0.825445199 | 0.725679204 | 0.099765995  | 1  | 827 |
| ZIC4       | chr3  | 147124148 | 147126147 | 0.861122138 | 0.764917762 | 0.096204376  | 20 | 828 |
| LINC00410  | chr13 | 91578352  | 91580351  | 0.287920057 | 0.450037118 | -0.162117061 | 2  | 829 |
| BCAS4      | chr20 | 49409931  | 49411930  | 0.342368763 | 0.286497749 | 0.055871014  | 10 | 830 |
| HPSE2      | chr10 | 100995120 | 100997119 | 0.671381775 | 0.580923235 | 0.09045854   | 12 | 831 |
| NA         | chr6  | 28600872  | 28602871  | 0.656784815 | 0.590813926 | 0.065970889  | 28 | 832 |
| MIR149     | chr2  | 241393918 | 241395917 | 0.833780131 | 0.734625408 | 0.099154722  | 8  | 833 |
| OR6N2      | chr1  | 158746926 | 158748925 | 0.307714251 | 0.499015759 | -0.191301508 | 2  | 834 |
| RUVBL1-AS1 | chr3  | 127793153 | 127795152 | 0.743932588 | 0.653475896 | 0.090456692  | 2  | 835 |
| TBC1D10C   | chr11 | 67169886  | 67171885  | 0.854193632 | 0.754077711 | 0.100115921  | 6  | 836 |
| T          | chr6  | 166581689 | 166583688 | 0.840457297 | 0.737204819 | 0.103252478  | 12 | 837 |
| H2AFJ      | chr12 | 14925770  | 14927769  | 0.851511808 | 0.754661379 | 0.096850429  | 14 | 838 |
| MAP1LC3B2  | chr12 | 116995686 | 116997685 | 0.895618604 | 0.788852499 | 0.106766105  | 11 | 839 |
| NA         | chr5  | 72745823  | 72747822  | 0.676876382 | 0.605563341 | 0.071313041  | 8  | 840 |
| FSD1L      | chr9  | 108208577 | 108210576 | 0.690664877 | 0.635164499 | 0.055500378  | 3  | 841 |
| LINC00577  | chr6  | 105387903 | 105389902 | 0.730087521 | 0.65562172  | 0.074465801  | 9  | 842 |
| NA         | chr8  | 6691576   | 6693575   | 0.702336269 | 0.627015622 | 0.075320647  | 17 | 843 |
| ARL5C      | chr17 | 37323238  | 37325237  | 0.838348778 | 0.746497531 | 0.091851246  | 4  | 844 |
| NA         | chr16 | 34428650  | 34430649  | 0.51299558  | 0.617540797 | -0.104545218 | 5  | 845 |
| NA         | chr5  | 22141078  | 22143077  | 0.642614314 | 0.523420568 | 0.119193747  | 2  | 846 |
| PMCHL1     | chr5  | 22140961  | 22142960  | 0.642614314 | 0.523420568 | 0.119193747  | 2  | 847 |
| NA         | chr2  | 105373678 | 105375677 | 0.749367844 | 0.644709747 | 0.104658097  | 1  | 848 |
| NA         | chr12 | 124454392 | 124456391 | 0.562613045 | 0.49321588  | 0.069397165  | 1  | 849 |
| NA         | chr19 | 7741887   | 7743886   | 0.918572509 | 0.818928584 | 0.099643925  | 2  | 850 |
| FAM219B    | chr15 | 75198963  | 75200962  | 0.611214382 | 0.535532637 | 0.075681745  | 7  | 851 |
| NA         | chr1  | 563891    | 565890    | 0.394288225 | 0.339051696 | 0.055236529  | 1  | 852 |
| MTND2P28   | chr1  | 563520    | 565519    | 0.394288225 | 0.339051696 | 0.055236529  | 1  | 853 |
| KRTAP13-3  | chr21 | 31797787  | 31799786  | 0.263541201 | 0.394001339 | -0.130460139 | 4  | 854 |
| NOC3L      | chr10 | 96122217  | 96124216  | 0.202895267 | 0.147679045 | 0.055216222  | 5  | 855 |
| NA         | chr16 | 24505999  | 24507998  | 0.646776408 | 0.734908749 | -0.08813234  | 1  | 856 |
| PCP4L1     | chr1  | 161227017 | 161229016 | 0.721353229 | 0.646006711 | 0.075346519  | 7  | 857 |
| NA         | chr5  | 8838344   | 8840343   | 0.360004804 | 0.484894469 | -0.124889664 | 5  | 858 |
| TEX40      | chr11 | 64066363  | 64068362  | 0.849464002 | 0.748447449 | 0.101016553  | 13 | 859 |
| NA         | chrX  | 72222196  | 72224195  | 0.944972756 | 0.635646477 | 0.309326278  | 1  | 860 |
| PABPC1L2B  | chrX  | 72221852  | 72223851  | 0.944972756 | 0.635646477 | 0.309326278  | 1  | 861 |
| SSR4       | chrX  | 153057471 | 153059470 | 0.55291121  | 0.487094396 | 0.065816814  | 2  | 862 |
| FAM169A    | chr5  | 74162277  | 74164276  | 0.520746125 | 0.465896528 | 0.054849597  | 10 | 863 |
| HLA-DPB1   | chr6  | 33042203  | 33044202  | 0.765669093 | 0.690200774 | 0.075468319  | 12 | 864 |
| MID1IP1    | chrX  | 38659185  | 38661184  | 0.743203698 | 0.659286445 | 0.083917253  | 9  | 865 |
| NA         | chr7  | 99724263  | 99726262  | 0.371216648 | 0.316432411 | 0.054784237  | 7  | 866 |
| WNT1       | chr12 | 49370898  | 49372897  | 0.72414299  | 0.642673282 | 0.081469708  | 13 | 867 |
| NA         | chr12 | 127100601 | 127102600 | 0.627063862 | 0.737254182 | -0.110190319 | 1  | 868 |
| NA         | chr17 | 14205671  | 14207670  | 0.644597023 | 0.561366321 | 0.083230703  | 13 | 869 |
| RNU6-40P   | chr1  | 31970026  | 31972025  | 0.862349902 | 0.739328615 | 0.123021287  | 1  | 870 |
| NA         | chr1  | 31970341  | 31972340  | 0.862349902 | 0.739328615 | 0.123021287  | 1  | 871 |
| NA         | chr11 | 68769017  | 68771016  | 0.849343859 | 0.74819055  | 0.101153309  | 1  | 872 |
| CAMK2N2    | chr3  | 183978752 | 183980751 | 0.240812913 | 0.186076034 | 0.054736879  | 8  | 873 |
| NA         | chr16 | 50698622  | 50700621  | 0.647459154 | 0.541478884 | 0.10598027   | 3  | 874 |
| NA         | chr16 | 2030133   | 2032132   | 0.811447384 | 0.715875748 | 0.095571637  | 7  | 875 |
| CLK3       | chr15 | 74889341  | 74891340  | 0.884302343 | 0.779147814 | 0.10515453   | 2  | 876 |
| ZNF213     | chr16 | 3178278   | 3180277   | 0.252358544 | 0.177850583 | 0.074507961  | 2  | 877 |
| SPATA6L    | chr9  | 4666175   | 4668174   | 0.212233401 | 0.12096577  | 0.091267631  | 4  | 878 |
| HR         | chr8  | 21990398  | 21992397  | 0.87769215  | 0.773311852 | 0.104380299  | 1  | 879 |
| ECHDC2     | chr1  | 53392385  | 53394384  | 0.628797086 | 0.560204739 | 0.068592347  | 13 | 880 |
| CD74       | chr5  | 149791993 | 149793992 | 0.880745276 | 0.778847832 | 0.101897444  | 10 | 881 |

|             |       |           |           |             |             |              |    |     |
|-------------|-------|-----------|-----------|-------------|-------------|--------------|----|-----|
| MARCH10     | chr17 | 60885206  | 60887205  | 0.779369837 | 0.706240027 | 0.073129809  | 9  | 882 |
| NA          | chr17 | 60884361  | 60886360  | 0.779369837 | 0.706240027 | 0.073129809  | 9  | 883 |
| MAATS1      | chr3  | 119420369 | 119422368 | 0.928883541 | 0.820178376 | 0.108705165  | 8  | 884 |
| KIAA1324    | chr1  | 109654801 | 109656800 | 0.488446873 | 0.429038621 | 0.059408252  | 11 | 885 |
| GALNT16     | chr14 | 69724494  | 69726493  | 0.584062203 | 0.52961171  | 0.054450493  | 9  | 886 |
| HIST1H2AM   | chr6  | 27860464  | 27862463  | 0.613108397 | 0.519139915 | 0.093968482  | 17 | 887 |
| FAM131B     | chr7  | 143059364 | 143061363 | 0.541109552 | 0.486684732 | 0.05442482   | 6  | 888 |
| DLX6-AS1    | chr7  | 96642878  | 96644877  | 0.857346838 | 0.778334143 | 0.079012695  | 6  | 889 |
| NA          | chr6  | 74405355  | 74407354  | 0.725713269 | 0.642446968 | 0.083266302  | 8  | 890 |
| NA          | chr4  | 106473013 | 106475012 | 0.803111941 | 0.888232475 | -0.085120534 | 3  | 891 |
| MSC         | chr8  | 72756204  | 72758203  | 0.678446436 | 0.605347522 | 0.073098914  | 14 | 892 |
| NA          | chr16 | 47920542  | 47922541  | 0.681490916 | 0.587305729 | 0.094185187  | 2  | 893 |
| SPTBN2      | chr11 | 66496198  | 66498197  | 0.882207193 | 0.777683649 | 0.104523543  | 1  | 894 |
| ZNF320      | chr19 | 53400447  | 53402446  | 0.73899082  | 0.647201698 | 0.091789122  | 5  | 895 |
| NPS         | chr10 | 129346113 | 129348112 | 0.16426181  | 0.248435588 | -0.084173777 | 3  | 896 |
| NA          | chr16 | 67464868  | 67466867  | 0.339983925 | 0.282566527 | 0.057417398  | 5  | 897 |
| PDE9A       | chr21 | 44072246  | 44074245  | 0.441733108 | 0.381779375 | 0.059953733  | 6  | 898 |
| LIN28B      | chr6  | 105403423 | 105405422 | 0.318724158 | 0.257869958 | 0.060854199  | 7  | 899 |
| C3orf55     | chr3  | 157259535 | 157261534 | 0.900564593 | 0.79629034  | 0.104274253  | 12 | 900 |
| C6orf99     | chr6  | 159289454 | 159291453 | 0.171671273 | 0.117518486 | 0.054152786  | 8  | 901 |
| SNX25P1     | chr1  | 211588867 | 211590866 | 0.667177512 | 0.60756778  | 0.059609732  | 4  | 902 |
| SNORD115-48 | chr15 | 25513430  | 25515429  | 0.347424639 | 0.424256082 | -0.076831443 | 4  | 903 |
| OR1L6       | chr9  | 125510519 | 125512518 | 0.496195678 | 0.674075164 | -0.177879486 | 1  | 904 |
| CACNG6      | chr19 | 54494042  | 54496041  | 0.74294275  | 0.680620878 | 0.062321872  | 11 | 905 |
| POLR2F      | chr22 | 38347114  | 38349113  | 0.85822623  | 0.756918593 | 0.101307637  | 2  | 906 |
| FERMT3      | chr11 | 63972650  | 63974649  | 0.847172895 | 0.748892832 | 0.098280062  | 9  | 907 |
| EPHA8       | chr1  | 22888557  | 22890556  | 0.499331851 | 0.436793829 | 0.062538022  | 6  | 908 |
| NA          | chr6  | 47444809  | 47446808  | 0.253306053 | 0.199311196 | 0.053994857  | 8  | 909 |
| NA          | chr15 | 38275467  | 38277466  | 0.581003187 | 0.659986466 | -0.078983279 | 2  | 910 |
| NA          | chr9  | 34665527  | 34667526  | 0.92667833  | 0.818450967 | 0.108227363  | 2  | 911 |
| NA          | chr9  | 34665610  | 34667609  | 0.92667833  | 0.818450967 | 0.108227363  | 2  | 912 |
| NA          | chr1  | 153698330 | 153700329 | 0.184273756 | 0.126340469 | 0.057933287  | 3  | 913 |
| MIR365A     | chr16 | 14401642  | 14403641  | 0.863328015 | 0.762436072 | 0.100891942  | 8  | 914 |
| NA          | chr16 | 71660220  | 71662219  | 0.406342058 | 0.300378149 | 0.105963909  | 3  | 915 |
| ZNF439      | chr19 | 11958041  | 11960040  | 0.722001254 | 0.601140468 | 0.120860786  | 3  | 916 |
| ATP5G2      | chr12 | 54070693  | 54072692  | 0.474094705 | 0.420184745 | 0.05390996   | 8  | 917 |
| ZNF729      | chr19 | 22467710  | 22469709  | 0.425299633 | 0.343970321 | 0.081329312  | 3  | 918 |
| NA          | chr5  | 158736441 | 158738440 | 0.709533138 | 0.622274306 | 0.087258832  | 2  | 919 |
| NA          | chr11 | 13030207  | 13032206  | 0.61963644  | 0.482924608 | 0.136711832  | 11 | 920 |
| TMC8        | chr17 | 76125351  | 76127350  | 0.785849603 | 0.695976329 | 0.089873274  | 6  | 921 |
| NA          | chr4  | 1105927   | 1107926   | 0.824542793 | 0.745086201 | 0.079456593  | 7  | 922 |
| C17orf104   | chr17 | 42732262  | 42734261  | 0.633226897 | 0.563043635 | 0.070183262  | 11 | 923 |
| YES1        | chr18 | 812048    | 814047    | 0.166960229 | 0.113139741 | 0.053820488  | 5  | 924 |
| RAB11FIP4   | chr17 | 29717142  | 29719141  | 0.696976916 | 0.621664468 | 0.075312448  | 6  | 925 |
| NA          | chr8  | 144800562 | 144802561 | 0.799924628 | 0.72069988  | 0.079224748  | 3  | 926 |
| NA          | chr2  | 89065335  | 89067334  | 0.856727079 | 0.759611106 | 0.097115973  | 5  | 927 |
| NA          | chr11 | 285805    | 287804    | 0.530623229 | 0.467889371 | 0.062733858  | 1  | 928 |
| WIF1        | chr12 | 65514847  | 65516846  | 0.733786684 | 0.662444449 | 0.071342235  | 8  | 929 |
| DDHD1       | chr14 | 53619501  | 53621500  | 0.293441653 | 0.239797869 | 0.053643785  | 8  | 930 |
| NA          | chr14 | 53619334  | 53621333  | 0.293441653 | 0.239797869 | 0.053643785  | 8  | 931 |
| WIPF1       | chr2  | 175547145 | 175549144 | 0.470902337 | 0.394920559 | 0.075981778  | 5  | 932 |
| ZNF428      | chr19 | 44123527  | 44125526  | 0.491080588 | 0.437437442 | 0.053643146  | 11 | 933 |
| CCL8        | chr17 | 32644555  | 32646554  | 0.51888308  | 0.576649742 | -0.057766662 | 5  | 934 |
| SNORD64     | chr15 | 25228511  | 25230510  | 0.323688388 | 0.496432468 | -0.172744079 | 6  | 935 |
| ARMC4       | chr10 | 28287478  | 28289477  | 0.459956994 | 0.406342936 | 0.053614058  | 14 | 936 |
| NEK6        | chr9  | 127018385 | 127020384 | 0.619262783 | 0.563567623 | 0.05569516   | 4  | 937 |
| SMIM11P1    | chr6  | 86445140  | 86447139  | 0.617238889 | 0.700862813 | -0.083623924 | 2  | 938 |
| NA          | chr1  | 59484559  | 59486558  | 0.889923644 | 0.785733963 | 0.104189681  | 1  | 939 |
| SNORD114-13 | chr14 | 101434716 | 101436715 | 0.542000473 | 0.472040152 | 0.069960321  | 4  | 940 |
| OR1Q1       | chr9  | 125375448 | 125377447 | 0.553836733 | 0.639890806 | -0.086054073 | 2  | 941 |
| TBC1D15     | chr12 | 72231987  | 72233986  | 0.345711958 | 0.288004978 | 0.057706981  | 13 | 942 |
| IRX1        | chr5  | 3594668   | 3596667   | 0.642738037 | 0.55411824  | 0.088619798  | 6  | 943 |
| NA          | chr17 | 46808953  | 46810952  | 0.894499736 | 0.79184152  | 0.102658216  | 6  | 944 |
| RAET1L      | chr6  | 150346169 | 150348168 | 0.893813886 | 0.791752887 | 0.102060999  | 11 | 945 |
| CEP170B     | chr14 | 105330117 | 105332116 | 0.688409236 | 0.607592108 | 0.080817129  | 4  | 946 |
| CCDC63      | chr12 | 111283073 | 111285072 | 0.618289096 | 0.552576428 | 0.065712668  | 11 | 947 |
| LINC00862   | chr1  | 200342983 | 200344982 | 0.780971552 | 0.884322506 | -0.103350954 | 1  | 948 |
| LRRFIP1     | chr2  | 238534719 | 238536718 | 0.560384631 | 0.498689443 | 0.061695188  | 10 | 949 |

|           |       |           |           |             |             |              |    |      |
|-----------|-------|-----------|-----------|-------------|-------------|--------------|----|------|
| CAMK1D    | chr10 | 12389981  | 12391980  | 0.475852643 | 0.398057187 | 0.077795457  | 7  | 950  |
| RTN4      | chr2  | 55339258  | 55341257  | 0.942183302 | 0.8321815   | 0.110001803  | 1  | 951  |
| NA        | chr11 | 69830482  | 69832481  | 0.724283196 | 0.642846888 | 0.081436307  | 6  | 952  |
| CPNE2     | chr16 | 57124949  | 57126948  | 0.503159505 | 0.426224765 | 0.07693474   | 8  | 953  |
| PLCD3     | chr17 | 43210222  | 43212221  | 0.601516748 | 0.520872303 | 0.080644445  | 1  | 954  |
| NTF4      | chr19 | 49567834  | 49569833  | 0.597539152 | 0.513869381 | 0.083669771  | 5  | 955  |
| NA        | chr2  | 45165839  | 45167838  | 0.736619777 | 0.649689726 | 0.086930051  | 5  | 956  |
| NA        | chr6  | 134212575 | 134214574 | 0.708718087 | 0.636108359 | 0.072609728  | 7  | 957  |
| LINC00320 | chr21 | 22175035  | 22177034  | 0.272829534 | 0.41258166  | -0.139752126 | 1  | 958  |
| NA        | chr8  | 2479954   | 2481953   | 0.624162208 | 0.540824681 | 0.083337528  | 4  | 959  |
| SLFN13    | chr17 | 33775357  | 33777356  | 0.81182275  | 0.729238771 | 0.082583979  | 15 | 960  |
| ZNF502    | chr3  | 44752635  | 44754634  | 0.557637489 | 0.504478479 | 0.05315901   | 14 | 961  |
| NA        | chr8  | 103539468 | 103541467 | 0.403260316 | 0.350155004 | 0.053105312  | 3  | 962  |
| HMX2      | chr10 | 124906138 | 124908137 | 0.725804967 | 0.642748703 | 0.083056264  | 14 | 963  |
| RASIP1    | chr19 | 49243479  | 49245478  | 0.794946928 | 0.741892916 | 0.053054012  | 6  | 964  |
| DSEL      | chr18 | 65183718  | 65185717  | 0.275522596 | 0.17115188  | 0.104370716  | 4  | 965  |
| C17orf72  | chr17 | 62074211  | 62076210  | 0.549236638 | 0.491637314 | 0.057599324  | 8  | 966  |
| SERPINE1  | chr7  | 100768870 | 100770869 | 0.602923065 | 0.503737096 | 0.099185969  | 10 | 967  |
| NA        | chr1  | 8000932   | 8002931   | 0.80615682  | 0.737725702 | 0.068431118  | 9  | 968  |
| ARHGEF4   | chr2  | 131592989 | 131594988 | 0.756484648 | 0.664993982 | 0.091490666  | 3  | 969  |
| NA        | chr12 | 48274932  | 48276931  | 0.913785486 | 0.807652293 | 0.106133192  | 1  | 970  |
| LNX1-AS2  | chr4  | 54457623  | 54459622  | 0.70048611  | 0.532800189 | 0.167685921  | 7  | 971  |
| NA        | chr10 | 28287217  | 28289216  | 0.40442229  | 0.351436032 | 0.052986258  | 14 | 972  |
| RSPH10B   | chr7  | 6009815   | 6011814   | 0.907606059 | 0.802257022 | 0.105349036  | 1  | 973  |
| CNOT6LP1  | chr15 | 56298875  | 56300874  | 0.29673116  | 0.452935624 | -0.156204464 | 1  | 974  |
| PLAC1L    | chr11 | 59806248  | 59808247  | 0.317294654 | 0.453900207 | -0.136605553 | 6  | 975  |
| TMEM215   | chr9  | 32781997  | 32783996  | 0.398334059 | 0.331619344 | 0.066714715  | 4  | 976  |
| NA        | chr2  | 8715132   | 8717131   | 0.860961547 | 0.743782601 | 0.117178946  | 2  | 977  |
| AKAP12    | chr6  | 151559634 | 151561633 | 0.72744405  | 0.64036022  | 0.08708383   | 10 | 978  |
| C1orf61   | chr1  | 156399994 | 156401993 | 0.769362607 | 0.683281012 | 0.086081595  | 4  | 979  |
| NA        | chr4  | 23561046  | 23563045  | 0.247556148 | 0.401501214 | -0.153945066 | 1  | 980  |
| NA        | chr5  | 175625799 | 175627798 | 0.58999386  | 0.518923342 | 0.071070518  | 3  | 981  |
| PJA1      | chrX  | 68385137  | 68387136  | 0.596228687 | 0.530566987 | 0.0656617    | 5  | 982  |
| NA        | chr8  | 38409699  | 38411698  | 0.739988998 | 0.641075121 | 0.098913877  | 3  | 983  |
| FAIM2     | chr12 | 50297501  | 50299500  | 0.832648557 | 0.738737889 | 0.093910668  | 7  | 984  |
| NA        | chr5  | 54528262  | 54530261  | 0.277927142 | 0.219796322 | 0.058130821  | 13 | 985  |
| ACTR3C    | chr7  | 150020315 | 150022314 | 0.614854319 | 0.549042954 | 0.065811365  | 11 | 986  |
| NA        | chr1  | 24882016  | 24884015  | 0.778684536 | 0.69085542  | 0.087829116  | 7  | 987  |
| NCMAP     | chr1  | 24881102  | 24883101  | 0.778684536 | 0.69085542  | 0.087829116  | 7  | 988  |
| NA        | chr17 | 79372040  | 79374039  | 0.589320135 | 0.522950752 | 0.066369383  | 10 | 989  |
| CDH11     | chr16 | 65159516  | 65161515  | 0.424064979 | 0.563727986 | -0.139663007 | 1  | 990  |
| FRZB      | chr2  | 183731391 | 183733390 | 0.694139106 | 0.607272769 | 0.086866337  | 10 | 991  |
| LAMP5     | chr20 | 9493505   | 9495504   | 0.36429467  | 0.308564915 | 0.055729756  | 8  | 992  |
| NA        | chr16 | 30195779  | 30197778  | 0.773101454 | 0.680365907 | 0.092735547  | 2  | 993  |
| ACSL1     | chr4  | 185747473 | 185749472 | 0.345300445 | 0.247620219 | 0.097680226  | 4  | 994  |
| NA        | chr1  | 564954    | 566953    | 0.383198671 | 0.330609204 | 0.052589468  | 4  | 995  |
| NA        | chrX  | 123094692 | 123096691 | 0.65494344  | 0.583906871 | 0.071036569  | 3  | 996  |
| FKBP5     | chr6  | 35695861  | 35697860  | 0.584929191 | 0.510385464 | 0.074543728  | 6  | 997  |
| MS4A3     | chr11 | 59822560  | 59824559  | 0.523709893 | 0.614522951 | -0.090813058 | 9  | 998  |
| NA        | chr22 | 50751560  | 50753559  | 0.802732078 | 0.710013309 | 0.092718769  | 1  | 999  |
| NA        | chr1  | 848051    | 850050    | 0.856913952 | 0.762028879 | 0.094885073  | 5  | 1000 |

**Supplementary Table S5. List of the 1,000 top-ranked, differentially methylated gene bodies after TET triple knockdown.**

This table is related to Fig. 2E. "NA" : No gene symbol provided.

| gene_symbol | chromosome | start     | end       | beta.GFP_siRNA | beta.GFP_scramble | difference   | num.sites | rank |
|-------------|------------|-----------|-----------|----------------|-------------------|--------------|-----------|------|
| NA          | chr10      | 124516210 | 124558696 | 0.191074666    | 0.481504885       | -0.29043022  | 1         | 1    |
| NA          | chr3       | 158519046 | 158519724 | 0.595314117    | 0.378443316       | 0.216870802  | 7         | 2    |
| NA          | chr16      | 34427706  | 34428105  | 0.149149323    | 0.417859054       | -0.268709732 | 1         | 3    |
| RARRES2P5   | chr16      | 34455954  | 34456419  | 0.371296702    | 0.630335355       | -0.259038653 | 1         | 4    |
| MIR3678     | chr17      | 73402150  | 73402243  | 0.422579473    | 0.15118847        | 0.271391002  | 1         | 5    |
| OXCT1-AS1   | chr5       | 41870132  | 41871059  | 0.475758851    | 0.294603602       | 0.181155249  | 9         | 6    |
| NA          | chr3       | 129100141 | 129112992 | 0.459473637    | 0.762034415       | -0.302560778 | 1         | 7    |
| NA          | chr7       | 10516208  | 10516505  | 0.323535343    | 0.535049195       | -0.211513852 | 1         | 8    |
| MIR4710     | chr14      | 105144031 | 105144086 | 0.466140878    | 0.285173084       | 0.180967794  | 1         | 9    |
| NSUN5P2     | chr7       | 72418120  | 72425329  | 0.7388574      | 0.554709766       | 0.184147634  | 5         | 10   |
| KRTAP5-5    | chr11      | 1651033   | 1652160   | 0.272022226    | 0.440597404       | -0.168575177 | 1         | 11   |
| RARRES2P9   | chr16      | 34578462  | 34578930  | 0.376919186    | 0.600236185       | -0.223316999 | 1         | 12   |
| OR51B2      | chr11      | 5344541   | 5345582   | 0.44200018     | 0.686598145       | -0.244597965 | 2         | 13   |
| NA          | chr8       | 138864570 | 138941287 | 0.100284062    | 0.255508706       | -0.155224644 | 1         | 14   |
| NA          | chr16      | 34597783  | 34624955  | 0.275582595    | 0.505049583       | -0.229466988 | 1         | 15   |
| NA          | chr5       | 6933783   | 7190925   | 0.28054295     | 0.454223382       | -0.173680433 | 1         | 16   |
| NA          | chr4       | 149948597 | 149983674 | 0.930558926    | 0.611119507       | 0.319439418  | 1         | 17   |
| NA          | chr7       | 1200010   | 1204903   | 0.303379542    | 0.135936351       | 0.16744319   | 4         | 18   |
| NA          | chr8       | 66754987  | 66755566  | 0.699169472    | 0.467344599       | 0.231824874  | 1         | 19   |
| SNORD114-12 | chr14      | 101435285 | 101435359 | 0.534356252    | 0.359871999       | 0.174484253  | 1         | 20   |
| OR4L1       | chr14      | 20528204  | 20529142  | 0.403942638    | 0.594660705       | -0.190718067 | 1         | 21   |
| SNORD115-48 | chr15      | 25514930  | 25515005  | 0.433408437    | 0.658599551       | -0.225191113 | 1         | 22   |
| NAP1L3      | chrX       | 92925929  | 92928567  | 0.557937014    | 0.382656951       | 0.175280063  | 2         | 23   |
| NA          | chr9       | 107753077 | 107754062 | 0.297440562    | 0.075943347       | 0.221497215  | 1         | 24   |
| SPANXA2-OT1 | chrX       | 140590843 | 140738057 | 0.575277151    | 0.393644772       | 0.181632379  | 1         | 25   |
| NA          | chr17      | 37182968  | 37183363  | 0.396411049    | 0.270020216       | 0.126390833  | 1         | 26   |
| NA          | chr14      | 89816629  | 89831043  | 0.74059024     | 0.478952838       | 0.261637402  | 1         | 27   |
| OR5H14      | chr3       | 97868170  | 97869249  | 0.251469318    | 0.412683863       | -0.161214546 | 1         | 28   |
| NA          | chr9       | 86322509  | 86328293  | 0.462660017    | 0.293654856       | 0.169005161  | 4         | 29   |
| NA          | chr3       | 55394471  | 55395857  | 0.389922839    | 0.712993671       | -0.323070832 | 1         | 30   |
| NA          | chr10      | 73638114  | 73638865  | 0.423942645    | 0.296772894       | 0.127169751  | 1         | 31   |
| SNORD38A    | chr1       | 45243515  | 45243584  | 0.270286469    | 0.389080437       | -0.118793968 | 1         | 32   |
| NA          | chr2       | 945320    | 945960    | 0.408184625    | 0.280987808       | 0.127196817  | 2         | 33   |
| HNRNPDP2    | chr6       | 65341098  | 65341575  | 0.826573871    | 0.584769795       | 0.241804076  | 1         | 34   |
| SLC25A1P4   | chr16      | 34407687  | 34408464  | 0.522522481    | 0.659570616       | -0.137048135 | 5         | 35   |
| NA          | chr1       | 191844625 | 191980390 | 0.335419958    | 0.470573753       | -0.135153794 | 1         | 36   |
| NA          | chr16      | 34442308  | 34518517  | 0.518204692    | 0.686243978       | -0.168039285 | 9         | 37   |
| NA          | chr5       | 163875428 | 163894408 | 0.284292505    | 0.457933817       | -0.173641312 | 2         | 38   |
| NA          | chr5       | 7363092   | 7364644   | 0.523797818    | 0.720641825       | -0.196844006 | 1         | 39   |
| NA          | chr6       | 114844615 | 114857039 | 0.804921892    | 0.559662939       | 0.245258953  | 1         | 40   |
| NA          | chr7       | 30589833  | 30591185  | 0.618579549    | 0.451710697       | 0.166868851  | 1         | 41   |
| SMEK3P      | chrX       | 27478921  | 27481413  | 0.275317216    | 0.530657816       | -0.2553406   | 1         | 42   |
| NA          | chr14      | 95651454  | 95652191  | 0.75745549     | 0.555590954       | 0.201864536  | 1         | 43   |
| MIR374A     | chrX       | 73507121  | 73507192  | 0.632229333    | 0.86030644        | -0.228077107 | 1         | 44   |
| ZNF626      | chr19      | 20802867  | 20844402  | 0.434414043    | 0.305665353       | 0.12874869   | 1         | 45   |
| OR5AP2      | chr11      | 56408942  | 56409947  | 0.410615066    | 0.618832203       | -0.208217137 | 1         | 46   |
| NA          | chr2       | 112248850 | 112268567 | 0.244189238    | 0.135228647       | 0.108960591  | 1         | 47   |
| NA          | chr2       | 112249520 | 112252388 | 0.244189238    | 0.135228647       | 0.108960591  | 1         | 48   |
| OR4X2       | chr11      | 48266608  | 48267622  | 0.312089001    | 0.596018714       | -0.283929713 | 1         | 49   |
| NA          | chr17      | 35969787  | 35973886  | 0.743523263    | 0.615499747       | 0.128023516  | 2         | 50   |
| SNORD114-26 | chr14      | 101453383 | 101453454 | 0.615596636    | 0.455128967       | 0.160467669  | 1         | 51   |
| NA          | chr11      | 96461317  | 96584822  | 0.352202665    | 0.500312631       | -0.148109966 | 2         | 52   |
| MBD3L2      | chr19      | 7049332   | 7051746   | 0.609702782    | 0.816892638       | -0.207189856 | 1         | 53   |
| DNM1P50     | chr15      | 30860025  | 30863292  | 0.410288468    | 0.642215188       | -0.23192672  | 1         | 54   |
| OR4S1       | chr11      | 48327775  | 48328704  | 0.654068097    | 0.488586127       | 0.16548197   | 1         | 55   |
| LINC00664   | chr19      | 21666176  | 21686040  | 0.549853627    | 0.678951077       | -0.12909745  | 3         | 56   |
| NA          | chr15      | 45492523  | 45492830  | 0.343899317    | 0.135097269       | 0.208802048  | 2         | 57   |
| NA          | chr18      | 29265618  | 29266786  | 0.655207064    | 0.494350524       | 0.16085654   | 2         | 58   |
| NA          | chr7       | 8301863   | 8302451   | 0.630040624    | 0.489847689       | 0.140192935  | 8         | 59   |
| NA          | chr3       | 108895285 | 108896212 | 0.794674697    | 0.602354839       | 0.192319858  | 1         | 60   |
| CD274       | chr9       | 5450503   | 5470566   | 0.462231452    | 0.359470174       | 0.102761278  | 3         | 61   |
| NA          | chr18      | 20837128  | 20840318  | 0.623476336    | 0.471798961       | 0.151677375  | 1         | 62   |
| MIR648      | chr22      | 18463634  | 18463727  | 0.52371044     | 0.399042147       | 0.124668293  | 1         | 63   |
| RN7SL832P   | chr2       | 10830470  | 10832225  | 0.469549232    | 0.368525564       | 0.101023668  | 5         | 64   |
| NA          | chr16      | 8947169   | 8948204   | 0.702027539    | 0.90618148        | -0.204153941 | 1         | 65   |
| NA          | chr3       | 112521325 | 112531666 | 0.796409293    | 0.617237531       | 0.179171762  | 1         | 66   |
| RHOT1P3     | chr13      | 19411908  | 19412238  | 0.555447434    | 0.716516607       | -0.161069173 | 1         | 67   |
| CD300E      | chr17      | 72606026  | 72619897  | 0.459117303    | 0.567617718       | -0.108500415 | 3         | 68   |
| NA          | chr19      | 13907388  | 13907747  | 0.736404907    | 0.573665807       | 0.1627391    | 1         | 69   |



|             |       |           |           |             |             |              |    |     |
|-------------|-------|-----------|-----------|-------------|-------------|--------------|----|-----|
| IFI44       | chr1  | 79115481  | 79129763  | 0.692783086 | 0.540085647 | 0.152697438  | 1  | 70  |
| MIR4724     | chr17 | 29861901  | 29861989  | 0.453431012 | 0.624707014 | -0.171276002 | 1  | 71  |
| NA          | chrX  | 122867024 | 122868144 | 0.473406489 | 0.368970161 | 0.104436328  | 1  | 72  |
| IRF5        | chr7  | 128577666 | 128590089 | 0.595697815 | 0.5003366   | 0.095361215  | 21 | 73  |
| NA          | chr16 | 34427061  | 34430032  | 0.425514584 | 0.577822034 | -0.15230745  | 4  | 74  |
| KIAA0125    | chr14 | 106383838 | 106391825 | 0.188952991 | 0.291685577 | -0.102732585 | 1  | 75  |
| NA          | chr9  | 128003942 | 128019297 | 0.235338858 | 0.335316764 | -0.099977906 | 2  | 76  |
| NA          | chr12 | 116248164 | 116323942 | 0.638188282 | 0.811799679 | -0.173611397 | 1  | 77  |
| ISL1        | chr5  | 50678921  | 50690564  | 0.514032258 | 0.394460174 | 0.119572084  | 27 | 78  |
| ARL2        | chr11 | 64781585  | 64789656  | 0.588421737 | 0.4948979   | 0.093523837  | 6  | 79  |
| IGFL1       | chr19 | 46733009  | 46734500  | 0.611509741 | 0.766367049 | -0.154857308 | 3  | 80  |
| RNASE6      | chr14 | 21249210  | 21250626  | 0.734130018 | 0.601184613 | 0.132945405  | 3  | 81  |
| NA          | chr2  | 171568961 | 171571077 | 0.789370461 | 0.665108708 | 0.124261753  | 12 | 82  |
| NA          | chr12 | 126468248 | 126470780 | 0.083864882 | 0.224793119 | -0.140928237 | 1  | 83  |
| OR2I1P      | chr6  | 29520996  | 29521943  | 0.646591995 | 0.51502437  | 0.131567626  | 35 | 84  |
| NA          | chr11 | 126873298 | 126874130 | 0.450310553 | 0.349348084 | 0.100962469  | 5  | 85  |
| NA          | chr16 | 1763528   | 1764209   | 0.800847529 | 0.636744135 | 0.164103394  | 1  | 86  |
| NA          | chr2  | 163018280 | 163029426 | 0.382940843 | 0.224267271 | 0.158673572  | 1  | 87  |
| NA          | chr2  | 65257861  | 65280151  | 0.824126144 | 0.656194774 | 0.16793137   | 1  | 88  |
| KRT18P13    | chr9  | 100461204 | 100463016 | 0.685974907 | 0.859897409 | -0.173922502 | 1  | 89  |
| NA          | chr6  | 38681827  | 38682993  | 0.847911734 | 0.678742236 | 0.169169499  | 1  | 90  |
| HIST1H2AL   | chr6  | 27833034  | 27833606  | 0.60637817  | 0.464564059 | 0.141814112  | 7  | 91  |
| C17orf50    | chr17 | 34087916  | 34092098  | 0.476622351 | 0.387301543 | 0.089320808  | 4  | 92  |
| NA          | chr7  | 134832797 | 134832916 | 0.620359217 | 0.497049666 | 0.123309551  | 2  | 93  |
| KRTAP9-2    | chr17 | 39382900  | 39383904  | 0.174010562 | 0.304226198 | -0.130215636 | 1  | 94  |
| HIST1H3D    | chr6  | 26197068  | 26199521  | 0.550301564 | 0.447648196 | 0.102653367  | 8  | 95  |
| SPANXN5     | chrX  | 52825184  | 52827141  | 0.438957464 | 0.546618754 | -0.10766129  | 4  | 96  |
| NA          | chr19 | 12203078  | 12225491  | 0.687145424 | 0.55028235  | 0.136863074  | 5  | 97  |
| DRAP1       | chr11 | 65686728  | 65689032  | 0.550870664 | 0.462039512 | 0.088831153  | 4  | 98  |
| NA          | chr6  | 19690056  | 19753344  | 0.815023144 | 0.674405142 | 0.140618002  | 9  | 99  |
| NA          | chr16 | 81103459  | 81110203  | 0.663734084 | 0.769907138 | -0.106173054 | 2  | 100 |
| NA          | chr19 | 8646044   | 8647599   | 0.656900832 | 0.812312284 | -0.155411453 | 1  | 101 |
| ASCL4       | chr12 | 108168162 | 108170421 | 0.725003662 | 0.602387798 | 0.122615864  | 8  | 102 |
| NA          | chr1  | 156657489 | 156661789 | 0.525599535 | 0.419787144 | 0.105812391  | 1  | 103 |
| NA          | chr16 | 86229787  | 86233326  | 0.785526582 | 0.63834102  | 0.147185563  | 8  | 104 |
| HIST1H2AE   | chr6  | 26217165  | 26217711  | 0.642732764 | 0.523954527 | 0.118778237  | 5  | 105 |
| UBE2C       | chr20 | 44441215  | 44445596  | 0.568000195 | 0.480324449 | 0.087675746  | 12 | 106 |
| NA          | chr15 | 69884468  | 69988089  | 0.519735072 | 0.392344311 | 0.127390761  | 1  | 107 |
| NA          | chr7  | 36134882  | 36140263  | 0.89373815  | 0.73267614  | 0.161062009  | 1  | 108 |
| MIR125B1    | chr11 | 121970465 | 121970552 | 0.318284026 | 0.406567608 | -0.088283582 | 1  | 109 |
| NA          | chr1  | 83439565  | 83451891  | 0.28859001  | 0.477722679 | -0.189132668 | 1  | 110 |
| NA          | chr15 | 30114834  | 30116284  | 0.268773284 | 0.159572563 | 0.109200721  | 5  | 111 |
| NA          | chr1  | 1822910   | 1824097   | 0.2906583   | 0.207809952 | 0.082848348  | 4  | 112 |
| NA          | chr1  | 30181698  | 30182394  | 0.900668308 | 0.74032203  | 0.160346278  | 1  | 113 |
| NA          | chr14 | 89017941  | 89018837  | 0.737776079 | 0.606342852 | 0.131433227  | 1  | 114 |
| NA          | chr22 | 20194100  | 20194706  | 0.650087555 | 0.534406707 | 0.115680848  | 1  | 115 |
| CCDC54      | chr3  | 107096188 | 107097481 | 0.592851016 | 0.487300401 | 0.105550614  | 1  | 116 |
| EHHADH-AS1  | chr3  | 184880659 | 184909743 | 0.583076704 | 0.451189028 | 0.131887676  | 1  | 117 |
| NA          | chrX  | 70882845  | 70885603  | 0.312511511 | 0.228845232 | 0.083666279  | 1  | 118 |
| NA          | chr17 | 15179879  | 15182794  | 0.947389918 | 0.780585533 | 0.166804385  | 1  | 119 |
| OR51I2      | chr11 | 5474638   | 5475707   | 0.561200172 | 0.661738183 | -0.100538011 | 2  | 120 |
| NA          | chr7  | 57832290  | 57832905  | 0.424315658 | 0.562627347 | -0.138311689 | 1  | 121 |
| NA          | chr7  | 57879525  | 57880333  | 0.277374191 | 0.483887145 | -0.206512954 | 1  | 122 |
| NA          | chr7  | 57879738  | 57880116  | 0.277374191 | 0.483887145 | -0.206512954 | 1  | 123 |
| ANKRD20A14P | chr1  | 142803532 | 142827235 | 0.612554454 | 0.742738929 | -0.130184475 | 1  | 124 |
| SLC2A3      | chr12 | 8071826   | 8088871   | 0.472470291 | 0.345519383 | 0.126950908  | 3  | 125 |
| GOS2        | chr1  | 209848765 | 209849733 | 0.638637902 | 0.532759705 | 0.105878197  | 6  | 126 |
| NA          | chr16 | 32857285  | 32857501  | 0.65643401  | 0.794946966 | -0.138512956 | 1  | 127 |
| IL10RB-AS1  | chr21 | 34636178  | 34638565  | 0.749480497 | 0.644478395 | 0.105002102  | 5  | 128 |
| BARHL2      | chr1  | 91177096  | 91182794  | 0.551900856 | 0.467587233 | 0.084313623  | 10 | 129 |
| NA          | chr8  | 144683416 | 144685394 | 0.875467056 | 0.724181157 | 0.151285899  | 1  | 130 |
| NA          | chr15 | 27667527  | 27673484  | 0.645104319 | 0.769697647 | -0.124593328 | 2  | 131 |
| ZNF702P     | chr19 | 53471504  | 53541151  | 0.607736696 | 0.520156526 | 0.08758017   | 17 | 132 |
| NA          | chr7  | 69060944  | 69062434  | 0.531129045 | 0.354385824 | 0.176743221  | 1  | 133 |
| NA          | chr5  | 50265051  | 50266001  | 0.776503747 | 0.642888088 | 0.133615659  | 5  | 134 |
| NXPE4       | chr11 | 114441313 | 114466484 | 0.48797618  | 0.593840584 | -0.105864404 | 2  | 135 |
| LINC00242   | chr6  | 170188886 | 170198921 | 0.581942761 | 0.502166796 | 0.079775965  | 16 | 136 |
| ABCA10      | chr17 | 67143355  | 67240987  | 0.705940899 | 0.521642589 | 0.18429831   | 2  | 137 |
| GPR112      | chrX  | 135383122 | 135519215 | 0.456647354 | 0.540829135 | -0.084181781 | 2  | 138 |
| NA          | chr16 | 29476288  | 29479154  | 0.72647444  | 0.602242695 | 0.124231745  | 1  | 139 |
| NA          | chr5  | 9001886   | 9046052   | 0.501281753 | 0.656804468 | -0.155522714 | 2  | 140 |
| MIR34B      | chr11 | 111383663 | 111383746 | 0.606859772 | 0.50309214  | 0.103767632  | 1  | 141 |

|              |       |           |           |             |             |              |    |     |
|--------------|-------|-----------|-----------|-------------|-------------|--------------|----|-----|
| NA           | chr3  | 44039573  | 44040641  | 0.796823082 | 0.661101021 | 0.135722062  | 6  | 142 |
| NA           | chr1  | 53832340  | 53833917  | 0.785300256 | 0.651977057 | 0.133323199  | 1  | 143 |
| OR6Q1        | chr11 | 57798402  | 57799403  | 0.102419209 | 0.212024585 | -0.109605376 | 1  | 144 |
| MIR4740      | chr17 | 79374516  | 79374578  | 0.903307374 | 0.75067391  | 0.152633464  | 1  | 145 |
| CLCF1        | chr11 | 67131639  | 67141648  | 0.519493831 | 0.441062755 | 0.078431075  | 13 | 146 |
| NA           | chr3  | 151835962 | 151869513 | 0.527324639 | 0.698678126 | -0.171353487 | 1  | 147 |
| NA           | chr17 | 48290294  | 48292718  | 0.793477261 | 0.659868701 | 0.13360856   | 1  | 148 |
| NA           | chr3  | 2004065   | 2029154   | 0.339957326 | 0.57603042  | -0.236073094 | 1  | 149 |
| SOX1         | chr13 | 112721913 | 112726020 | 0.73604157  | 0.638538816 | 0.097502755  | 16 | 150 |
| NA           | chr20 | 30135307  | 30135852  | 0.777027096 | 0.646810217 | 0.130216879  | 1  | 151 |
| ZNF718       | chr4  | 124386    | 157779    | 0.41810905  | 0.525035982 | -0.106926932 | 5  | 152 |
| SLC31A2      | chr9  | 115913222 | 115926417 | 0.663459203 | 0.52639935  | 0.137059853  | 5  | 153 |
| NA           | chr16 | 34375269  | 34375779  | 0.821615973 | 0.685294081 | 0.136321892  | 1  | 154 |
| CD70         | chr19 | 6583194   | 6604114   | 0.698141548 | 0.599392721 | 0.098748827  | 11 | 155 |
| NA           | chr14 | 52577840  | 52596343  | 0.845560661 | 0.688317148 | 0.157243513  | 1  | 156 |
| MARCKSL1P2   | chr6  | 138723722 | 138724697 | 0.903156347 | 0.754030442 | 0.149125905  | 1  | 157 |
| OR52A1       | chr11 | 5172239   | 5207612   | 0.473205979 | 0.572613572 | -0.099407593 | 3  | 158 |
| HIST1H2AD    | chr6  | 26199079  | 26199471  | 0.632398494 | 0.526381703 | 0.106016791  | 2  | 159 |
| NA           | chr5  | 54529762  | 54591029  | 0.779653075 | 0.672092251 | 0.107560824  | 7  | 160 |
| NA           | chrX  | 36975986  | 36976212  | 0.567865619 | 0.466188853 | 0.101676767  | 3  | 161 |
| HIST1H2BF    | chr6  | 26199748  | 26200942  | 0.534490645 | 0.452054226 | 0.082436419  | 5  | 162 |
| NA           | chr17 | 1923246   | 1926958   | 0.825959787 | 0.690631058 | 0.135328729  | 2  | 163 |
| NA           | chr7  | 38350984  | 38351409  | 0.681692233 | 0.556240188 | 0.125452045  | 3  | 164 |
| C6orf164     | chr6  | 88106840  | 88109467  | 0.713877763 | 0.597036957 | 0.116840807  | 1  | 165 |
| NA           | chr1  | 16841140  | 16842249  | 0.502400567 | 0.419996393 | 0.082404174  | 1  | 166 |
| RARRES2P8    | chr16 | 34777650  | 34778016  | 0.582138403 | 0.672387558 | -0.090249155 | 3  | 167 |
| ZNF253       | chr19 | 19976695  | 20005483  | 0.599794678 | 0.496694673 | 0.103100006  | 5  | 168 |
| NA           | chr18 | 61602042  | 61609601  | 0.551950188 | 0.466790869 | 0.085159319  | 7  | 169 |
| NA           | chr17 | 33164890  | 33186065  | 0.715265598 | 0.599715819 | 0.115549779  | 1  | 170 |
| NA           | chr4  | 152328703 | 152329987 | 0.898674337 | 0.737623791 | 0.161050546  | 2  | 171 |
| PLK5         | chr19 | 1524073   | 1535455   | 0.810420268 | 0.735436397 | 0.074983871  | 9  | 172 |
| HIST1H1PS1   | chr6  | 26195794  | 26195999  | 0.933383801 | 0.78523144  | 0.148152361  | 3  | 173 |
| NA           | chr7  | 22689579  | 22705152  | 0.771495866 | 0.856338854 | -0.084842988 | 4  | 174 |
| MIR1258      | chr2  | 180725563 | 180725635 | 0.127532753 | 0.052663063 | 0.07486969   | 1  | 175 |
| OMD          | chr9  | 95176527  | 95186743  | 0.606209854 | 0.721301208 | -0.115091354 | 1  | 176 |
| VAV3-AS1     | chr1  | 108507065 | 108537229 | 0.481981951 | 0.401228536 | 0.080753415  | 10 | 177 |
| NA           | chr5  | 153281019 | 153282783 | 0.674390221 | 0.80159152  | -0.127201299 | 1  | 178 |
| NA           | chr12 | 49483991  | 49487095  | 0.716065266 | 0.622269634 | 0.093795632  | 9  | 179 |
| LIPG         | chr18 | 47087069  | 47119272  | 0.472283811 | 0.397821212 | 0.074462599  | 17 | 180 |
| NA           | chr11 | 89456650  | 89460421  | 0.571338297 | 0.679106241 | -0.107767945 | 1  | 181 |
| NA           | chr16 | 57125125  | 57126215  | 0.654726797 | 0.551265085 | 0.103461711  | 6  | 182 |
| NA           | chr19 | 23258003  | 23283163  | 0.402832295 | 0.325853196 | 0.076979099  | 4  | 183 |
| NA           | chr10 | 37598113  | 37635959  | 0.203404285 | 0.129126154 | 0.074278131  | 1  | 184 |
| OR8U1        | chr11 | 56143100  | 56144029  | 0.308026452 | 0.464507587 | -0.156481134 | 1  | 185 |
| MIR30A       | chr6  | 72113254  | 72113324  | 0.275784985 | 0.473697456 | -0.19791247  | 1  | 186 |
| NA           | chr11 | 116644105 | 116644921 | 0.076724782 | 0.166705585 | -0.089980803 | 1  | 187 |
| NA           | chr1  | 110438595 | 110440483 | 0.690114327 | 0.581166858 | 0.108947469  | 1  | 188 |
| NA           | chr19 | 58907457  | 58908407  | 0.808297846 | 0.681308517 | 0.126989329  | 1  | 189 |
| NA           | chr15 | 91382954  | 91384608  | 0.86937411  | 0.733088702 | 0.136285408  | 1  | 190 |
| NA           | chr11 | 89677203  | 89682570  | 0.469111096 | 0.584635284 | -0.115524188 | 2  | 191 |
| KRTAP10-12   | chr21 | 46117087  | 46117959  | 0.547729028 | 0.649709688 | -0.10198066  | 1  | 192 |
| PATZ1        | chr22 | 31721790  | 31742218  | 0.66054142  | 0.586930578 | 0.073610842  | 9  | 193 |
| GAD2         | chr10 | 26505236  | 26593487  | 0.710545249 | 0.627789535 | 0.082755714  | 15 | 194 |
| TUBB8P9      | chr1  | 227693883 | 227695993 | 0.484069941 | 0.573834316 | -0.089764375 | 1  | 195 |
| ARHGAP31-AS1 | chr3  | 119033140 | 119041607 | 0.466907648 | 0.393697071 | 0.073210577  | 5  | 196 |
| NA           | chr17 | 27219487  | 27220360  | 0.856243323 | 0.723152921 | 0.133090402  | 1  | 197 |
| CH25H        | chr10 | 90965694  | 90967071  | 0.639566818 | 0.548721863 | 0.090844954  | 5  | 198 |
| RNF224       | chr9  | 140122018 | 140124090 | 0.266392626 | 0.193398704 | 0.072993922  | 2  | 199 |
| NA           | chr17 | 21793031  | 21814739  | 0.758221536 | 0.846153055 | -0.08793152  | 4  | 200 |
| NA           | chr1  | 27995979  | 27996787  | 0.634029189 | 0.380711601 | 0.253317588  | 1  | 201 |
| BSX          | chr11 | 122848278 | 122852428 | 0.732321133 | 0.636706064 | 0.095615069  | 14 | 202 |
| NA           | chr2  | 12855541  | 12856353  | 0.803388442 | 0.679051809 | 0.124336633  | 1  | 203 |
| ANKDD1B      | chr5  | 74907284  | 74967671  | 0.621660409 | 0.544466929 | 0.07719348   | 10 | 204 |
| MAGI1-AS1    | chr3  | 65879491  | 65910972  | 0.581603825 | 0.654141098 | -0.072537272 | 2  | 205 |
| C1orf68      | chr1  | 152691998 | 152692905 | 0.532877214 | 0.637351893 | -0.10447468  | 1  | 206 |
| RIPPLY2      | chr6  | 84562985  | 84567234  | 0.588069722 | 0.499193343 | 0.088876379  | 7  | 207 |
| NA           | chr6  | 68597538  | 68599231  | 0.48864835  | 0.560866405 | -0.072218055 | 8  | 208 |
| SLFN13       | chr17 | 33762115  | 33775856  | 0.697440649 | 0.61859576  | 0.078844889  | 8  | 209 |
| CHODL-AS1    | chr21 | 19207333  | 19257925  | 0.450628008 | 0.575317198 | -0.124689191 | 1  | 210 |
| TGFBR3L      | chr19 | 7981030   | 7983982   | 0.640134379 | 0.568028121 | 0.072106259  | 8  | 211 |
| MIR663B      | chr2  | 133014539 | 133014653 | 0.899294699 | 0.761423895 | 0.137870803  | 1  | 212 |
| NA           | chr8  | 109907258 | 110075646 | 0.485362231 | 0.354098054 | 0.131264177  | 2  | 213 |

|              |       |           |           |             |             |              |    |     |
|--------------|-------|-----------|-----------|-------------|-------------|--------------|----|-----|
| SEPN1        | chr1  | 26126667  | 26144713  | 0.683045113 | 0.611218565 | 0.071826548  | 6  | 214 |
| NA           | chr14 | 53620072  | 53624246  | 0.52712925  | 0.455613082 | 0.071516168  | 6  | 215 |
| PTGR1        | chr9  | 114312002 | 114362135 | 0.588839604 | 0.509616864 | 0.07922274   | 4  | 216 |
| NA           | chr2  | 220362333 | 220362968 | 0.817119111 | 0.643854663 | 0.173264447  | 2  | 217 |
| NA           | chr16 | 9535151   | 9538842   | 0.727175204 | 0.857682779 | -0.130507575 | 1  | 218 |
| DECR1        | chr8  | 91013633  | 91064320  | 0.83809195  | 0.705997599 | 0.132094351  | 6  | 219 |
| ASCL1        | chr12 | 103351464 | 103354294 | 0.677114043 | 0.580613605 | 0.096500437  | 12 | 220 |
| NA           | chr16 | 760746    | 761277    | 0.787743884 | 0.667856368 | 0.119887516  | 1  | 221 |
| NEURL2       | chr20 | 44517264  | 44519926  | 0.675352082 | 0.58965473  | 0.085697352  | 8  | 222 |
| LINC00677    | chr14 | 103587184 | 103589344 | 0.3504436   | 0.276993782 | 0.073449818  | 1  | 223 |
| NA           | chr15 | 80846950  | 80855285  | 0.905439767 | 0.768598382 | 0.136841385  | 1  | 224 |
| SH3BGR3      | chr1  | 26605667  | 26608007  | 0.431348382 | 0.360196055 | 0.071152327  | 9  | 225 |
| NA           | chr17 | 75523080  | 75532674  | 0.729045938 | 0.657907578 | 0.07113836   | 13 | 226 |
| NA           | chr10 | 120001076 | 120027222 | 0.504528422 | 0.577980593 | -0.073452171 | 6  | 227 |
| NA           | chr3  | 186528669 | 186543310 | 0.685158186 | 0.568584543 | 0.116573643  | 1  | 228 |
| TRAT1        | chr3  | 108541545 | 108573852 | 0.260941823 | 0.403044926 | -0.142103103 | 1  | 229 |
| NA           | chr20 | 6194346   | 6196028   | 0.819185232 | 0.610506088 | 0.208679144  | 1  | 230 |
| KRTAP13-3    | chr21 | 31797583  | 31798286  | 0.178955271 | 0.3279866   | -0.149031329 | 2  | 231 |
| C10orf71-AS1 | chr10 | 50504157  | 50507063  | 0.647492953 | 0.734739241 | -0.087246288 | 7  | 232 |
| HMX3         | chr10 | 124895478 | 124897257 | 0.767920905 | 0.661571439 | 0.106349466  | 11 | 233 |
| NA           | chr14 | 62536236  | 62547872  | 0.844142065 | 0.704449343 | 0.139692722  | 1  | 234 |
| TRIM74       | chr7  | 72430016  | 72439997  | 0.949169724 | 0.808664335 | 0.140505389  | 1  | 235 |
| NA           | chr9  | 128506033 | 128508831 | 0.369895331 | 0.235401291 | 0.13449404   | 2  | 236 |
| OR13F1       | chr9  | 107266455 | 107267547 | 0.34882378  | 0.595845443 | -0.247021663 | 1  | 237 |
| NA           | chr16 | 56226526  | 56228430  | 0.726584446 | 0.610674127 | 0.115910319  | 5  | 238 |
| ZDHC20P4     | chr13 | 69559190  | 69560196  | 0.782012358 | 0.684301236 | 0.097711122  | 2  | 239 |
| BNIP3P1      | chr14 | 28733596  | 28735180  | 0.614610691 | 0.499083291 | 0.115527401  | 1  | 240 |
| EGFL6        | chrX  | 13587724  | 13651694  | 0.815725694 | 0.699805666 | 0.115920028  | 6  | 241 |
| SSX6         | chrX  | 47967365  | 47980073  | 0.855967859 | 0.730884876 | 0.125082982  | 1  | 242 |
| MIR4655      | chr7  | 1883816   | 1883889   | 0.842110068 | 0.719087316 | 0.123022752  | 1  | 243 |
| DUSP26       | chr8  | 33448856  | 33457624  | 0.677488494 | 0.595819875 | 0.081668619  | 11 | 244 |
| MAST4-AS1    | chr5  | 66297211  | 66299781  | 0.379657843 | 0.196805441 | 0.182852402  | 1  | 245 |
| NA           | chr6  | 30616443  | 30616536  | 0.811090109 | 0.9475156   | -0.13642549  | 2  | 246 |
| IL17RB       | chr3  | 53880607  | 53899827  | 0.737311722 | 0.646102745 | 0.091208978  | 5  | 247 |
| IGFL4        | chr19 | 46543006  | 46580376  | 0.51050482  | 0.636572551 | -0.126067731 | 8  | 248 |
| SPAG4        | chr20 | 34203814  | 34208971  | 0.431189438 | 0.362766398 | 0.06842304   | 12 | 249 |
| LINC00877    | chr3  | 72084451  | 72291716  | 0.702786402 | 0.624414694 | 0.078371708  | 15 | 250 |
| NA           | chr16 | 30215637  | 30220392  | 0.672482483 | 0.570366932 | 0.102115552  | 1  | 251 |
| CTSE         | chr1  | 206317459 | 206332104 | 0.806552848 | 0.69897062  | 0.107582228  | 3  | 252 |
| PABPC1P1     | chr4  | 39975064  | 39975958  | 0.675503276 | 0.577558812 | 0.097944464  | 1  | 253 |
| LINC00152    | chr2  | 87754887  | 87906324  | 0.698060979 | 0.629775072 | 0.068285907  | 3  | 254 |
| NA           | chr17 | 79336072  | 79348014  | 0.822914557 | 0.708611451 | 0.114303105  | 3  | 255 |
| GBP4         | chr1  | 89646831  | 89664615  | 0.506528942 | 0.413354941 | 0.093174     | 8  | 256 |
| ANKRD18EP    | chr6  | 39078097  | 39080728  | 0.244070825 | 0.386553242 | -0.142482417 | 1  | 257 |
| RASD1        | chr17 | 17397751  | 17399709  | 0.656223856 | 0.588080359 | 0.068143498  | 6  | 258 |
| NA           | chr10 | 119776998 | 119805321 | 0.625539427 | 0.713245695 | -0.087706268 | 3  | 259 |
| NA           | chr14 | 91288709  | 91294472  | 0.250269574 | 0.33370386  | -0.083434286 | 2  | 260 |
| NA           | chr19 | 53426635  | 53427328  | 0.411060931 | 0.323436558 | 0.087624373  | 1  | 261 |
| NA           | chr4  | 19748802  | 19756214  | 0.485722986 | 0.622174741 | -0.136451755 | 1  | 262 |
| OR4C15       | chr11 | 55321783  | 55322895  | 0.278943405 | 0.526750446 | -0.247807042 | 1  | 263 |
| MIR146A      | chr5  | 159895275 | 159914433 | 0.578964304 | 0.646596061 | -0.067631757 | 4  | 264 |
| LINC00113    | chr21 | 29094698  | 29123552  | 0.317898832 | 0.46974829  | -0.151849458 | 1  | 265 |
| PNLIPRP3     | chr10 | 118187379 | 118237469 | 0.339638275 | 0.438763872 | -0.099125597 | 1  | 266 |
| NA           | chr5  | 164647583 | 164668758 | 0.133460315 | 0.275578292 | -0.142117977 | 1  | 267 |
| IFITM1       | chr11 | 313506    | 315272    | 0.78471694  | 0.692671445 | 0.092045495  | 9  | 268 |
| LINC00620    | chr3  | 13692196  | 13788132  | 0.660607707 | 0.59276735  | 0.067840357  | 11 | 269 |
| NA           | chr18 | 18820636  | 18821332  | 0.863691306 | 0.742057374 | 0.121633932  | 1  | 270 |
| GALNT4       | chr12 | 89913185  | 89918583  | 0.807729215 | 0.717774854 | 0.089954361  | 2  | 271 |
| NA           | chr1  | 51660767  | 51700768  | 0.804990122 | 0.700714519 | 0.104275603  | 4  | 272 |
| NA           | chr7  | 89748613  | 89752204  | 0.458592431 | 0.378813389 | 0.079779042  | 9  | 273 |
| NA           | chr16 | 68679283  | 68680071  | 0.769394577 | 0.661648063 | 0.107746514  | 3  | 274 |
| NA           | chr1  | 228483612 | 228490699 | 0.389300863 | 0.457198868 | -0.067898005 | 1  | 275 |
| LCE2A        | chr1  | 152670840 | 152671918 | 0.201914135 | 0.299977353 | -0.098063218 | 3  | 276 |
| NA           | chr9  | 35646267  | 35647096  | 0.21281394  | 0.146092428 | 0.066721512  | 4  | 277 |
| ZNF85        | chr19 | 21106028  | 21133503  | 0.405320059 | 0.318247508 | 0.087072552  | 6  | 278 |
| NA           | chr4  | 166605791 | 166683930 | 0.52658118  | 0.633840922 | -0.107259742 | 2  | 279 |
| TCN2         | chr22 | 31002825  | 31023265  | 0.6756747   | 0.586378747 | 0.089295953  | 10 | 280 |
| HIST1H2BI    | chr6  | 26273144  | 26273622  | 0.838418938 | 0.721658012 | 0.116760926  | 9  | 281 |
| SOX10        | chr22 | 38366693  | 38383429  | 0.908208054 | 0.841857321 | 0.066350734  | 11 | 282 |
| GPR151       | chr5  | 145892666 | 145895753 | 0.249807064 | 0.397434209 | -0.147627145 | 1  | 283 |
| NA           | chr2  | 77213091  | 77236917  | 0.218661385 | 0.422541241 | -0.203879856 | 1  | 284 |
| TMCO5B       | chr15 | 33527753  | 33539822  | 0.846367824 | 0.729329157 | 0.117038667  | 1  | 285 |

|            |       |           |           |             |             |              |    |     |
|------------|-------|-----------|-----------|-------------|-------------|--------------|----|-----|
| NA         | chr11 | 66176629  | 66184608  | 0.851650427 | 0.75420915  | 0.097441277  | 3  | 286 |
| NA         | chr18 | 43608272  | 43609795  | 0.743860934 | 0.660337688 | 0.083523246  | 3  | 287 |
| ZFP36L2    | chr2  | 43449541  | 43453748  | 0.406364664 | 0.34044461  | 0.065920054  | 15 | 288 |
| NA         | chrX  | 135377849 | 135382457 | 0.723208932 | 0.805101194 | -0.081892262 | 2  | 289 |
| NA         | chr5  | 114937754 | 114956356 | 0.634179714 | 0.549149688 | 0.085030027  | 10 | 290 |
| HELT       | chr4  | 185939995 | 185941958 | 0.750413192 | 0.647023203 | 0.103389989  | 14 | 291 |
| NA         | chr11 | 116969703 | 116978886 | 0.933817024 | 0.805593688 | 0.128223336  | 1  | 292 |
| NA         | chr3  | 146627472 | 147088443 | 0.672926257 | 0.569122607 | 0.10380365   | 35 | 293 |
| NA         | chr2  | 177042445 | 177043736 | 0.685149447 | 0.59476023  | 0.090389217  | 7  | 294 |
| DHH        | chr12 | 49483204  | 49488602  | 0.719040191 | 0.621735376 | 0.097304815  | 17 | 295 |
| NA         | chr14 | 29252697  | 29254993  | 0.880170423 | 0.770193668 | 0.109976755  | 6  | 296 |
| NA         | chr12 | 54822087  | 54823187  | 0.874517141 | 0.754918064 | 0.119599077  | 1  | 297 |
| C8orf56    | chr8  | 104145191 | 104153703 | 0.724788279 | 0.636925476 | 0.087862803  | 12 | 298 |
| ZNF75A     | chr16 | 3355406   | 3368852   | 0.787322827 | 0.68940989  | 0.097912937  | 7  | 299 |
| UGT2B10    | chr4  | 69681711  | 69696914  | 0.262270701 | 0.489231258 | -0.226960557 | 1  | 300 |
| SIGLEC17P  | chr19 | 51670585  | 51676780  | 0.774300339 | 0.642356397 | 0.131943942  | 1  | 301 |
| NA         | chr17 | 58203896  | 58213005  | 0.741766558 | 0.643073275 | 0.098693283  | 5  | 302 |
| NA         | chr2  | 127782787 | 127787262 | 0.719500073 | 0.635374065 | 0.084126008  | 6  | 303 |
| NA         | chr2  | 127781828 | 127783299 | 0.650625489 | 0.568418518 | 0.082206971  | 6  | 304 |
| OR4S2      | chr11 | 55418380  | 55419315  | 0.355247561 | 0.550900911 | -0.19565335  | 1  | 305 |
| ANKRD36BP2 | chr2  | 89065324  | 89106126  | 0.790914889 | 0.692875067 | 0.098039822  | 6  | 306 |
| NBN        | chr8  | 90945564  | 91015456  | 0.63933398  | 0.55241431  | 0.086919671  | 24 | 307 |
| SNORD64    | chr15 | 25230011  | 25230320  | 0.467098066 | 0.630989884 | -0.163891818 | 2  | 308 |
| NA         | chr7  | 129781571 | 129782455 | 0.880091638 | 0.761939248 | 0.11815239   | 2  | 309 |
| MBD3L5     | chr19 | 7030589   | 7033022   | 0.780855012 | 0.902938336 | -0.122083324 | 1  | 310 |
| ARL11      | chr13 | 50202435  | 50208008  | 0.760164622 | 0.669028443 | 0.09113618   | 7  | 311 |
| DPY19L2P4  | chr7  | 89748714  | 89754914  | 0.542307109 | 0.456629367 | 0.085677742  | 3  | 312 |
| VPS9D1-AS1 | chr16 | 89778264  | 89784573  | 0.886390495 | 0.776898782 | 0.109491713  | 5  | 313 |
| NA         | chr16 | 34809205  | 34809865  | 0.569729837 | 0.634384856 | -0.06465502  | 3  | 314 |
| NA         | chr2  | 166651361 | 166666520 | 0.534021615 | 0.332430541 | 0.201591074  | 1  | 315 |
| MIR184     | chr15 | 79502130  | 79502213  | 0.877820999 | 0.759683484 | 0.118137515  | 1  | 316 |
| MIR1914    | chr20 | 62572818  | 62572897  | 0.901426725 | 0.780148334 | 0.121278391  | 1  | 317 |
| LINC00575  | chr4  | 83534266  | 83542590  | 0.558573664 | 0.697128579 | -0.138554915 | 1  | 318 |
| EDN1       | chr6  | 12290596  | 12297427  | 0.620129533 | 0.550486574 | 0.069642959  | 3  | 319 |
| SOX14      | chr3  | 137483579 | 137484396 | 0.782000372 | 0.675162453 | 0.106837919  | 5  | 320 |
| NA         | chr7  | 9765870   | 9767915   | 0.642404099 | 0.734602418 | -0.09219832  | 5  | 321 |
| NA         | chr8  | 42409933  | 42410336  | 0.524017014 | 0.651708017 | -0.127691003 | 1  | 322 |
| MIR501     | chrX  | 49774330  | 49774413  | 0.800894794 | 0.685803086 | 0.115091709  | 1  | 323 |
| NA         | chr16 | 34430150  | 34431915  | 0.594239158 | 0.6750932   | -0.080854042 | 4  | 324 |
| LINC00665  | chr19 | 36803969  | 36822620  | 0.528919411 | 0.463929954 | 0.064989457  | 5  | 325 |
| NA         | chr14 | 66424015  | 66471241  | 0.672580678 | 0.745734068 | -0.07315339  | 3  | 326 |
| NA         | chr9  | 110182565 | 110193083 | 0.704171808 | 0.609851687 | 0.094320121  | 1  | 327 |
| NA         | chr1  | 95302304  | 95320982  | 0.504586812 | 0.438462036 | 0.066124776  | 3  | 328 |
| NA         | chr17 | 9550337   | 9550977   | 0.817031414 | 0.708028552 | 0.109002862  | 1  | 329 |
| SNORD3D    | chr17 | 19015313  | 19015949  | 0.225060269 | 0.160985699 | 0.06407457   | 2  | 330 |
| HIST1H3A   | chr6  | 26020718  | 26021186  | 0.759078824 | 0.658316123 | 0.100762701  | 3  | 331 |
| NA         | chr5  | 70741443  | 70742396  | 0.109526124 | 0.196377739 | -0.086851614 | 1  | 332 |
| NA         | chr16 | 4230118   | 4233516   | 0.886852995 | 0.778017889 | 0.108835106  | 3  | 333 |
| NA         | chr19 | 47050313  | 47104118  | 0.275505961 | 0.201275745 | 0.074230216  | 3  | 334 |
| NA         | chr12 | 52700400  | 52702155  | 0.827864398 | 0.720447738 | 0.10741666   | 3  | 335 |
| NA         | chr5  | 3596325   | 3600302   | 0.52077727  | 0.435327861 | 0.085449409  | 12 | 336 |
| KRTAP4-5   | chr17 | 39305178  | 39306054  | 0.622929814 | 0.718212358 | -0.095282544 | 1  | 337 |
| NA         | chr8  | 134585426 | 134586104 | 0.785171504 | 0.697977405 | 0.087194099  | 2  | 338 |
| URAHP      | chr16 | 90106169  | 90114181  | 0.718892991 | 0.632878425 | 0.086014566  | 5  | 339 |
| NA         | chr21 | 43290742  | 43292163  | 0.594745576 | 0.685212299 | -0.090466723 | 1  | 340 |
| TRBJ2-3    | chr7  | 142494531 | 142494579 | 0.560906522 | 0.476448751 | 0.084457771  | 1  | 341 |
| OXTR       | chr3  | 8792094   | 8811314   | 0.753384616 | 0.688020795 | 0.065363821  | 14 | 342 |
| RPS29P22   | chr17 | 26443265  | 26443432  | 0.73650387  | 0.63954923  | 0.09695464   | 1  | 343 |
| NA         | chr7  | 27226192  | 27233067  | 0.555277209 | 0.475378007 | 0.079899203  | 19 | 344 |
| GRAP2      | chr22 | 40297086  | 40369725  | 0.830195905 | 0.721556973 | 0.108638932  | 2  | 345 |
| C2orf50    | chr2  | 11273179  | 11286916  | 0.713532824 | 0.641878496 | 0.071654328  | 5  | 346 |
| NA         | chr19 | 49927006  | 49932075  | 0.617751214 | 0.53432318  | 0.083428034  | 8  | 347 |
| NA         | chr16 | 34659735  | 34660854  | 0.485613902 | 0.585760562 | -0.10014666  | 2  | 348 |
| UCN2       | chr3  | 48599160  | 48601206  | 0.745414016 | 0.83876877  | -0.093354754 | 3  | 349 |
| NA         | chr12 | 102329994 | 102330452 | 0.774552062 | 0.673310228 | 0.101241834  | 1  | 350 |
| NA         | chr21 | 44019390  | 44035168  | 0.935597481 | 0.813600899 | 0.121996582  | 1  | 351 |
| HIST1H2BO  | chr6  | 27861203  | 27861669  | 0.698628449 | 0.610106748 | 0.088521701  | 6  | 352 |
| NA         | chr17 | 8261731   | 8263538   | 0.826943193 | 0.68546381  | 0.141479383  | 1  | 353 |
| MROH6      | chr8  | 144648357 | 144655141 | 0.57619075  | 0.513819803 | 0.062370946  | 21 | 354 |
| FGFBP2     | chr4  | 15961866  | 15970932  | 0.783885657 | 0.70241673  | 0.081468927  | 10 | 355 |
| NA         | chr16 | 28873487  | 28874661  | 0.228110495 | 0.306280707 | -0.078170212 | 1  | 356 |
| CD163      | chr12 | 7623409   | 7656489   | 0.558732453 | 0.642498208 | -0.083765754 | 1  | 357 |

|            |       |           |           |             |             |              |    |     |
|------------|-------|-----------|-----------|-------------|-------------|--------------|----|-----|
| GALNT14    | chr2  | 31133333  | 31378068  | 0.668326034 | 0.606195838 | 0.062130196  | 24 | 358 |
| NA         | chr16 | 66503699  | 66515133  | 0.69786614  | 0.607176642 | 0.090689498  | 1  | 359 |
| NA         | chr9  | 29824740  | 29826709  | 0.554999652 | 0.663545354 | -0.108545702 | 3  | 360 |
| ANKRD20A7P | chr9  | 44076368  | 44118444  | 0.526995581 | 0.457992684 | 0.069002897  | 2  | 361 |
| SLC22A20   | chr11 | 64981311  | 65010228  | 0.749915759 | 0.661378668 | 0.08853709   | 7  | 362 |
| ACCS       | chr11 | 44087475  | 44105772  | 0.636679285 | 0.549050039 | 0.087629246  | 11 | 363 |
| NA         | chr5  | 50265494  | 50266021  | 0.755898756 | 0.658577028 | 0.097321728  | 3  | 364 |
| NA         | chr1  | 190447681 | 190449865 | 0.413390033 | 0.343888807 | 0.069501225  | 1  | 365 |
| MIR548B    | chr6  | 119390212 | 119390308 | 0.661161748 | 0.576092738 | 0.08506901   | 1  | 366 |
| ZNF730     | chr19 | 23258012  | 23330021  | 0.445000197 | 0.349520957 | 0.09547924   | 9  | 367 |
| NA         | chr9  | 13406379  | 13433052  | 0.593407241 | 0.680786343 | -0.087379102 | 1  | 368 |
| CD46P1     | chr1  | 207818579 | 207830755 | 0.654146479 | 0.592769365 | 0.061377114  | 5  | 369 |
| USP4       | chr3  | 49315264  | 49378145  | 0.380960994 | 0.319630653 | 0.06133034   | 12 | 370 |
| NA         | chr5  | 50261521  | 50262842  | 0.814989574 | 0.717442456 | 0.097547119  | 3  | 371 |
| INCA1      | chr17 | 4891425   | 4900905   | 0.530881625 | 0.469672717 | 0.061208908  | 7  | 372 |
| BCRP8      | chr22 | 23522058  | 23522465  | 0.567522563 | 0.490655948 | 0.076866615  | 4  | 373 |
| NA         | chr19 | 49567516  | 49568113  | 0.68763217  | 0.589708298 | 0.097923871  | 3  | 374 |
| NA         | chr2  | 108145943 | 108172782 | 0.281438182 | 0.410065996 | -0.128627814 | 2  | 375 |
| C19orf59   | chr19 | 7741514   | 7744712   | 0.826908875 | 0.732378617 | 0.094530258  | 7  | 376 |
| NA         | chr6  | 31409444  | 31414750  | 0.158259648 | 0.097289722 | 0.060969926  | 10 | 377 |
| SULT1C4    | chr2  | 108994367 | 109004513 | 0.71266476  | 0.617612113 | 0.095052647  | 4  | 378 |
| HCST       | chr19 | 36393382  | 36395279  | 0.731430547 | 0.65351235  | 0.077918197  | 2  | 379 |
| PHOSPHO1   | chr17 | 47300724  | 47308128  | 0.697418332 | 0.613350682 | 0.08406765   | 11 | 380 |
| NA         | chr20 | 31169765  | 31181702  | 0.426121461 | 0.365345889 | 0.060775572  | 10 | 381 |
| DEFB125    | chr20 | 68351     | 77174     | 0.375390026 | 0.464201456 | -0.08881143  | 2  | 382 |
| ADAM28     | chr8  | 24151553  | 24216531  | 0.77625242  | 0.698875968 | 0.077376452  | 4  | 383 |
| NA         | chr16 | 73517216  | 73521643  | 0.803105467 | 0.671681072 | 0.131424395  | 1  | 384 |
| NA         | chr14 | 92719837  | 92730000  | 0.822949922 | 0.730683187 | 0.092266735  | 3  | 385 |
| SP100      | chr2  | 231280657 | 231408805 | 0.886488599 | 0.776503051 | 0.109985549  | 6  | 386 |
| ATP5LP7    | chr17 | 40799852  | 40800161  | 0.755789951 | 0.66103973  | 0.094750221  | 1  | 387 |
| TCF24      | chr8  | 67858736  | 67874825  | 0.432834901 | 0.361853067 | 0.070981834  | 10 | 388 |
| OR13C8     | chr9  | 107331449 | 107332411 | 0.34724931  | 0.476119298 | -0.128869988 | 1  | 389 |
| NA         | chr19 | 567212    | 572215    | 0.656804009 | 0.578068569 | 0.078735441  | 8  | 390 |
| OR6K6      | chr1  | 158724510 | 158725681 | 0.257046351 | 0.401930025 | -0.144883674 | 2  | 391 |
| DUOXA2     | chr15 | 45406519  | 45410619  | 0.865036788 | 0.76083219  | 0.104204598  | 15 | 392 |
| TMEM238    | chr19 | 55890613  | 55895966  | 0.87492858  | 0.766168399 | 0.108760181  | 3  | 393 |
| NA         | chr5  | 1884080   | 1884763   | 0.912817303 | 0.799104391 | 0.113712912  | 2  | 394 |
| NA         | chr17 | 33867058  | 33867816  | 0.934614418 | 0.81835724  | 0.116257178  | 1  | 395 |
| KLF2       | chr19 | 16435628  | 16438685  | 0.620435476 | 0.550155305 | 0.070280171  | 7  | 396 |
| NA         | chr9  | 14993310  | 15019727  | 0.819426093 | 0.695286143 | 0.12413995   | 2  | 397 |
| CCDC78     | chr16 | 772582    | 776954    | 0.660362426 | 0.583832246 | 0.07653018   | 11 | 398 |
| AMOT       | chrX  | 112017731 | 112084043 | 0.540531018 | 0.618600114 | -0.078069096 | 12 | 399 |
| C7orf69    | chr7  | 47834889  | 47859445  | 0.77427217  | 0.850154152 | -0.075881982 | 4  | 400 |
| NA         | chr4  | 66868999  | 66882510  | 0.233967692 | 0.427907307 | -0.193939615 | 1  | 401 |
| RNF126P1   | chr17 | 55122839  | 55124158  | 0.891091178 | 0.781415147 | 0.109676031  | 5  | 402 |
| GPR97      | chr16 | 57702099  | 57723975  | 0.833709886 | 0.749407625 | 0.084302261  | 3  | 403 |
| RUVBL1-AS1 | chr3  | 127794653 | 127797899 | 0.854005528 | 0.749860128 | 0.104145399  | 7  | 404 |
| ZIC4       | chr3  | 147103833 | 147124647 | 0.79749159  | 0.695917213 | 0.101574377  | 65 | 405 |
| NA         | chr8  | 125823860 | 125827924 | 0.267084845 | 0.439142916 | -0.172058072 | 1  | 406 |
| NA         | chr1  | 151102551 | 151104086 | 0.904687757 | 0.793037828 | 0.111649929  | 3  | 407 |
| C20orf201  | chr20 | 62714733  | 62715712  | 0.715893612 | 0.627343777 | 0.088549835  | 1  | 408 |
| NA         | chr10 | 104614029 | 104661656 | 0.544210673 | 0.472717937 | 0.071492736  | 20 | 409 |
| NT5C1A     | chr1  | 40124793  | 40137710  | 0.790719149 | 0.731546031 | 0.059173118  | 5  | 410 |
| NA         | chr5  | 153863477 | 153865710 | 0.874550558 | 0.767168091 | 0.107382467  | 4  | 411 |
| NA         | chr16 | 68595964  | 68601032  | 0.770042745 | 0.878044655 | -0.10800191  | 1  | 412 |
| MBOAT4     | chr8  | 29989340  | 30002202  | 0.68359969  | 0.546443384 | 0.137156306  | 1  | 413 |
| NA         | chr6  | 150361683 | 150363169 | 0.50016056  | 0.570558801 | -0.070398241 | 1  | 414 |
| IL11       | chr19 | 55875757  | 55881831  | 0.538997558 | 0.479991929 | 0.059005628  | 6  | 415 |
| PHLDA1     | chr12 | 76419227  | 76427712  | 0.268937572 | 0.210000863 | 0.058936708  | 8  | 416 |
| FPR3       | chr19 | 52298416  | 52329442  | 0.837707074 | 0.733781271 | 0.103925803  | 3  | 417 |
| NA         | chr5  | 27472399  | 27496508  | 0.262389438 | 0.439791763 | -0.177402325 | 2  | 418 |
| SLFN12     | chr17 | 33738079  | 33760302  | 0.698788799 | 0.614994678 | 0.083794121  | 12 | 419 |
| ZNF597     | chr16 | 3486104   | 3493542   | 0.676892355 | 0.588663434 | 0.088228921  | 8  | 420 |
| CNN2P7     | chr21 | 15199017  | 15199948  | 0.700738847 | 0.798155267 | -0.09741642  | 1  | 421 |
| NA         | chr6  | 73972731  | 73972807  | 0.303888936 | 0.098977383 | 0.204911552  | 1  | 422 |
| SNORA57    | chr11 | 62432894  | 62433042  | 0.850358841 | 0.746836232 | 0.103522609  | 1  | 423 |
| NA         | chr1  | 243242159 | 243265035 | 0.708873271 | 0.644119484 | 0.064753787  | 3  | 424 |
| NA         | chr2  | 10588820  | 10591453  | 0.362327336 | 0.292564164 | 0.069763171  | 3  | 425 |
| NA         | chr4  | 106461347 | 106473512 | 0.795892086 | 0.883869697 | -0.087977611 | 3  | 426 |
| TMBIM1     | chr2  | 219138915 | 219157309 | 0.557397712 | 0.495834549 | 0.061563163  | 13 | 427 |
| NA         | chr3  | 159944270 | 159945841 | 0.873392229 | 0.767113306 | 0.106278922  | 2  | 428 |
| NA         | chr7  | 1499573   | 1503644   | 0.554660813 | 0.492385221 | 0.062275592  | 3  | 429 |

|            |       |           |           |             |             |              |    |     |
|------------|-------|-----------|-----------|-------------|-------------|--------------|----|-----|
| TSTD1      | chr1  | 161007421 | 161008780 | 0.7957507   | 0.706860436 | 0.088890264  | 8  | 430 |
| KRTAP15-1  | chr21 | 31812597  | 31813070  | 0.177728157 | 0.316648835 | -0.138920678 | 1  | 431 |
| NA         | chr11 | 124614530 | 124616233 | 0.880045984 | 0.780199666 | 0.099846318  | 3  | 432 |
| NA         | chrX  | 124337654 | 124338187 | 0.607388082 | 0.524814529 | 0.082573554  | 3  | 433 |
| LRRCS2     | chr1  | 165513244 | 165533198 | 0.801043141 | 0.721345611 | 0.07969753   | 7  | 434 |
| DEFB122    | chr20 | 30009239  | 30016983  | 0.745590747 | 0.848001828 | -0.102411081 | 1  | 435 |
| NA         | chr4  | 175015811 | 175141549 | 0.775280825 | 0.659667008 | 0.115613817  | 25 | 436 |
| TAGLN3     | chr3  | 111717511 | 111732734 | 0.854220513 | 0.744487117 | 0.109733395  | 16 | 437 |
| NA         | chr2  | 162280526 | 162285285 | 0.870983898 | 0.764713255 | 0.106270643  | 16 | 438 |
| NA         | chr16 | 86226399  | 86232519  | 0.819761382 | 0.727995334 | 0.091766048  | 12 | 439 |
| MIR365A    | chr16 | 14403142  | 14403228  | 0.93612387  | 0.82375336  | 0.11237051   | 1  | 440 |
| TMEM233    | chr12 | 120031264 | 120079363 | 0.571630792 | 0.49666714  | 0.074963652  | 12 | 441 |
| BPIFA3     | chr20 | 31805116  | 31815564  | 0.890482549 | 0.78364568  | 0.106836869  | 1  | 442 |
| SNORD116-1 | chr15 | 25296624  | 25296718  | 0.299401909 | 0.477590116 | -0.178188207 | 2  | 443 |
| SIX2       | chr2  | 45232300  | 45236569  | 0.876108178 | 0.774324597 | 0.101783581  | 14 | 444 |
| B3GNT9     | chr16 | 67182008  | 67185117  | 0.899586701 | 0.797590006 | 0.101996695  | 9  | 445 |
| NA         | chr17 | 31861129  | 31868358  | 0.21928242  | 0.337006839 | -0.117724418 | 2  | 446 |
| NA         | chrX  | 83755033  | 83757461  | 0.809335381 | 0.71756261  | 0.091772772  | 4  | 447 |
| ENO2       | chr12 | 7022909   | 7032861   | 0.541404809 | 0.483848097 | 0.057556712  | 15 | 448 |
| KRTAP3-3   | chr17 | 39149686  | 39150385  | 0.566222632 | 0.631205955 | -0.064983323 | 2  | 449 |
| NA         | chr12 | 50302665  | 50305646  | 0.732742509 | 0.644916118 | 0.087826391  | 1  | 450 |
| HOXB5      | chr17 | 46668619  | 46671323  | 0.553893143 | 0.473435724 | 0.080457419  | 24 | 451 |
| OR4F5      | chr1  | 69091     | 70008     | 0.756368899 | 0.665798433 | 0.090570466  | 1  | 452 |
| NA         | chr4  | 188534919 | 188581523 | 0.341540266 | 0.45769371  | -0.116153444 | 4  | 453 |
| SETDB1     | chr1  | 150898739 | 150937213 | 0.515109152 | 0.457686177 | 0.057422975  | 5  | 454 |
| CTSW       | chr11 | 65647280  | 65651212  | 0.887999661 | 0.782373574 | 0.105626087  | 3  | 455 |
| SNORA69    | chrX  | 118921316 | 118921447 | 0.207048927 | 0.387104346 | -0.18005542  | 1  | 456 |
| C6orf183   | chr6  | 109487036 | 109592217 | 0.595620707 | 0.693708169 | -0.098087463 | 2  | 457 |
| MEIS1-AS2  | chr2  | 66666220  | 66667444  | 0.852617341 | 0.723733258 | 0.128884083  | 9  | 458 |
| ZNF66      | chr19 | 20959110  | 20991922  | 0.210000697 | 0.267286504 | -0.057285807 | 1  | 459 |
| PNPLA4     | chrX  | 7866288   | 7895780   | 0.441556025 | 0.3678369   | 0.073719125  | 13 | 460 |
| MIR574     | chr4  | 38869653  | 38869748  | 0.765879019 | 0.649644026 | 0.116234994  | 1  | 461 |
| KRTAP1-3   | chr17 | 39190142  | 39191107  | 0.788951097 | 0.895594835 | -0.106643738 | 1  | 462 |
| MT1E       | chr16 | 56659387  | 56661024  | 0.880418618 | 0.776323018 | 0.1040956    | 6  | 463 |
| NA         | chr8  | 38401170  | 38410198  | 0.383288099 | 0.248566709 | 0.13472139   | 1  | 464 |
| CEBPD      | chr8  | 48649471  | 48651648  | 0.485841708 | 0.424243855 | 0.061597853  | 9  | 465 |
| NA         | chr22 | 42318027  | 42319104  | 0.844883172 | 0.744564508 | 0.100318664  | 1  | 466 |
| NA         | chr4  | 150587209 | 150632301 | 0.378464824 | 0.489182441 | -0.110717616 | 1  | 467 |
| NA         | chr2  | 9897625   | 9910470   | 0.873890123 | 0.770277326 | 0.103612797  | 2  | 468 |
| ZNRF1      | chr16 | 75032928  | 75144892  | 0.679524354 | 0.613101715 | 0.066422639  | 20 | 469 |
| AGFG2      | chr7  | 100136834 | 100165842 | 0.604550767 | 0.539470683 | 0.065080084  | 6  | 470 |
| SPARC      | chr5  | 151040657 | 151066726 | 0.848389026 | 0.761606232 | 0.086782794  | 12 | 471 |
| MIR138-1   | chr3  | 44155704  | 44155802  | 0.892727259 | 0.787352115 | 0.105375144  | 1  | 472 |
| RN7SKP89   | chr5  | 113589210 | 113589451 | 0.104974709 | 0.246773718 | -0.141799009 | 1  | 473 |
| NA         | chr9  | 34665662  | 34681295  | 0.92667833  | 0.818450967 | 0.108227363  | 2  | 474 |
| NA         | chr1  | 21619783  | 21626267  | 0.887874179 | 0.783586432 | 0.104287747  | 2  | 475 |
| TMEM140    | chr7  | 134832824 | 134850650 | 0.79842021  | 0.719686529 | 0.078733681  | 9  | 476 |
| MIR9-3     | chr15 | 89911248  | 89911337  | 0.870200637 | 0.754322127 | 0.11587851   | 2  | 477 |
| NA         | chr17 | 21934958  | 21935393  | 0.807115903 | 0.712194662 | 0.094921241  | 1  | 478 |
| NA         | chr14 | 38503492  | 38663486  | 0.579199316 | 0.488091663 | 0.091107653  | 5  | 479 |
| OTOL1      | chr3  | 161214596 | 161221730 | 0.192073979 | 0.316247165 | -0.124173186 | 2  | 480 |
| NA         | chr1  | 47846600  | 47874149  | 0.166644484 | 0.223167198 | -0.056522714 | 1  | 481 |
| NA         | chr8  | 65486863  | 65494445  | 0.590192445 | 0.479241488 | 0.110950957  | 40 | 482 |
| NA         | chr17 | 46810453  | 46811250  | 0.894499736 | 0.79184152  | 0.102658216  | 6  | 483 |
| KRT84      | chr12 | 52771596  | 52779436  | 0.702165032 | 0.778985797 | -0.076820765 | 3  | 484 |
| NA         | chr22 | 25957084  | 25960429  | 0.554458646 | 0.498122618 | 0.056336029  | 4  | 485 |
| NA         | chr9  | 119266562 | 119324572 | 0.255590396 | 0.382925857 | -0.127335461 | 1  | 486 |
| CD34       | chr1  | 208057594 | 208084747 | 0.667174663 | 0.5971126   | 0.070062063  | 14 | 487 |
| C1QTNF2    | chr5  | 159774758 | 159797648 | 0.631104279 | 0.574813483 | 0.056290796  | 6  | 488 |
| C1orf56    | chr1  | 151020216 | 151024462 | 0.614455871 | 0.558273858 | 0.056182014  | 7  | 489 |
| NA         | chr5  | 169758433 | 169760883 | 0.944828484 | 0.833732209 | 0.111096275  | 1  | 490 |
| NA         | chr14 | 75310727  | 75322378  | 0.768514072 | 0.868972085 | -0.100458013 | 2  | 491 |
| TEX26      | chr13 | 31506840  | 31549639  | 0.842309511 | 0.756899987 | 0.085409524  | 3  | 492 |
| KCNC2      | chr12 | 75433857  | 75603648  | 0.574667027 | 0.477330566 | 0.097336461  | 15 | 493 |
| NA         | chr14 | 82071691  | 82089405  | 0.196953807 | 0.370964222 | -0.174010415 | 1  | 494 |
| NA         | chr4  | 1714548   | 1715349   | 0.572402066 | 0.466504835 | 0.105897232  | 3  | 495 |
| ATL3       | chr11 | 63391559  | 63439393  | 0.761029576 | 0.675985294 | 0.085044282  | 21 | 496 |
| NA         | chr1  | 187412738 | 187446354 | 0.655216778 | 0.741358977 | -0.0861422   | 1  | 497 |
| FOXD4L1    | chr2  | 114256661 | 114258728 | 0.696044806 | 0.609833658 | 0.086211148  | 5  | 498 |
| NA         | chr6  | 34247456  | 34254545  | 0.869616918 | 0.768926229 | 0.100690689  | 1  | 499 |
| KRTAP10-2  | chr21 | 45970240  | 45971388  | 0.728587576 | 0.644181489 | 0.084406087  | 1  | 500 |
| C19orf45   | chr19 | 7557862   | 7573336   | 0.785525817 | 0.716920645 | 0.068605172  | 12 | 501 |

|             |       |           |           |             |             |              |     |     |
|-------------|-------|-----------|-----------|-------------|-------------|--------------|-----|-----|
| OR51F1      | chr11 | 4790209   | 4791168   | 0.193699846 | 0.390898716 | -0.197198871 | 1   | 502 |
| NA          | chr4  | 175898722 | 175900532 | 0.2860183   | 0.434596428 | -0.148578128 | 1   | 503 |
| NA          | chr22 | 50753060  | 50754437  | 0.802732078 | 0.710013309 | 0.092718769  | 1   | 504 |
| SH2D1B      | chr1  | 162365056 | 162381928 | 0.708799263 | 0.641963839 | 0.066835424  | 3   | 505 |
| NA          | chr7  | 56355923  | 56359118  | 0.433633388 | 0.537725405 | -0.104092017 | 3   | 506 |
| NA          | chr1  | 158444244 | 158464676 | 0.736787206 | 0.832561186 | -0.09577398  | 1   | 507 |
| OR10R2      | chr1  | 158449668 | 158450675 | 0.736787206 | 0.832561186 | -0.09577398  | 1   | 508 |
| LINC00568   | chr1  | 150488233 | 150490508 | 0.157464866 | 0.097949715 | 0.059515152  | 2   | 509 |
| LHX5        | chr12 | 113899839 | 113910085 | 0.731845953 | 0.651225443 | 0.08062051   | 37  | 510 |
| NA          | chr18 | 65183783  | 65566856  | 0.47140135  | 0.377922414 | 0.093478937  | 4   | 511 |
| NA          | chr14 | 21989234  | 21990794  | 0.78224988  | 0.692440571 | 0.089809309  | 1   | 512 |
| NA          | chr8  | 138821687 | 139095813 | 0.191829186 | 0.331173262 | -0.139344076 | 3   | 513 |
| NA          | chr6  | 140175987 | 140181288 | 0.289340482 | 0.447631825 | -0.158291343 | 1   | 514 |
| CLPSL2      | chr6  | 35744371  | 35747329  | 0.179644198 | 0.091394491 | 0.088249706  | 1   | 515 |
| NA          | chr20 | 30615556  | 30619378  | 0.8327559   | 0.755599551 | 0.077156349  | 7   | 516 |
| FKBP11      | chr12 | 49315301  | 49320257  | 0.732925257 | 0.650857515 | 0.082067742  | 19  | 517 |
| CYP4A22-AS1 | chr1  | 47562325  | 47644943  | 0.680169161 | 0.747407829 | -0.067238667 | 4   | 518 |
| BTC         | chr4  | 75669969  | 75719896  | 0.729505203 | 0.646278464 | 0.08322674   | 6   | 519 |
| MTND2P28    | chr1  | 565020    | 566063    | 0.394288225 | 0.339051696 | 0.055236529  | 1   | 520 |
| C16orf86    | chr16 | 67700719  | 67702661  | 0.71481248  | 0.658980224 | 0.055832256  | 5   | 521 |
| OR1S1       | chr11 | 57982217  | 57983195  | 0.621446865 | 0.743326071 | -0.121879206 | 1   | 522 |
| CLIC3       | chr9  | 139889087 | 139891255 | 0.692781369 | 0.637579312 | 0.055202058  | 7   | 523 |
| NA          | chr18 | 76736555  | 76739074  | 0.777877055 | 0.676300762 | 0.101576293  | 7   | 524 |
| ZNF878      | chr19 | 12154620  | 12167127  | 0.573714718 | 0.499648285 | 0.074066433  | 8   | 525 |
| ZIC1        | chr3  | 147111209 | 147228080 | 0.812040644 | 0.716344792 | 0.095695852  | 125 | 526 |
| SRRD        | chr22 | 26879843  | 26887899  | 0.775053569 | 0.719877964 | 0.055175604  | 5   | 527 |
| NA          | chr5  | 16617334  | 16621385  | 0.572836207 | 0.517672539 | 0.055163667  | 5   | 528 |
| C1orf194    | chr1  | 109648573 | 109656479 | 0.518990006 | 0.461914312 | 0.057075694  | 10  | 529 |
| C1QA        | chr1  | 22962999  | 22966101  | 0.810666506 | 0.740965061 | 0.069701445  | 5   | 530 |
| SSTR1       | chr14 | 38677204  | 38682272  | 0.540593956 | 0.448156009 | 0.092437947  | 14  | 531 |
| MIXL1       | chr1  | 226411319 | 226414755 | 0.701017921 | 0.625063956 | 0.075953965  | 5   | 532 |
| C3orf80     | chr3  | 159943423 | 159945999 | 0.426153869 | 0.359608798 | 0.066545071  | 5   | 533 |
| NA          | chr5  | 67726254  | 67730308  | 0.826187108 | 0.732386688 | 0.09380042   | 2   | 534 |
| OR6K3       | chr1  | 158686958 | 158687953 | 0.172863936 | 0.366433603 | -0.193569666 | 1   | 535 |
| MBLAC1      | chr7  | 99724317  | 99726118  | 0.371216648 | 0.316432411 | 0.054784237  | 7   | 536 |
| NA          | chr19 | 38307999  | 38317278  | 0.785950465 | 0.696924465 | 0.089026     | 5   | 537 |
| TCF21       | chr6  | 134210276 | 134216691 | 0.812436116 | 0.72416286  | 0.088273257  | 20  | 538 |
| NA          | chr1  | 53793905  | 53802181  | 0.780831975 | 0.726108539 | 0.054723436  | 6   | 539 |
| ARAP1-AS2   | chr11 | 72411519  | 72416652  | 0.655632757 | 0.739497289 | -0.083864532 | 1   | 540 |
| IFITM2      | chr11 | 307631    | 315272    | 0.775661851 | 0.700505902 | 0.075155948  | 22  | 541 |
| PRTN3       | chr19 | 840963    | 848175    | 0.762863697 | 0.698723227 | 0.064140469  | 14  | 542 |
| NA          | chr5  | 72747323  | 72749220  | 0.886319673 | 0.79396929  | 0.092350383  | 3   | 543 |
| RHOT1P2     | chr21 | 15309314  | 15309646  | 0.578292671 | 0.661853422 | -0.083560751 | 1   | 544 |
| NA          | chr16 | 218678    | 219333    | 0.91690764  | 0.813656829 | 0.10325081   | 1   | 545 |
| NA          | chr7  | 39649209  | 39649889  | 0.893332216 | 0.795268681 | 0.098063535  | 5   | 546 |
| OR51G1      | chr11 | 4944531   | 4945637   | 0.281028392 | 0.416956467 | -0.135928075 | 1   | 547 |
| ZNF319      | chr16 | 58028572  | 58034357  | 0.779448969 | 0.716132986 | 0.063315984  | 11  | 548 |
| NA          | chr6  | 157097494 | 157098211 | 0.145535554 | 0.091122568 | 0.054412987  | 2   | 549 |
| NA          | chr8  | 101487903 | 101513376 | 0.926420512 | 0.822313325 | 0.104107187  | 1   | 550 |
| NA          | chr1  | 206214526 | 206223548 | 0.664743447 | 0.586605557 | 0.07813789   | 3   | 551 |
| NA          | chr1  | 205425057 | 205438152 | 0.461850149 | 0.407512655 | 0.054337494  | 10  | 552 |
| PPAP2C      | chr19 | 281040    | 291393    | 0.856064482 | 0.773997435 | 0.082067047  | 13  | 553 |
| NA          | chr18 | 74207477  | 74210045  | 0.548302903 | 0.473848258 | 0.074454645  | 6   | 554 |
| OR5D13      | chr11 | 55540914  | 55541858  | 0.336437279 | 0.493387455 | -0.156950176 | 2   | 555 |
| NA          | chr1  | 101788893 | 101855859 | 0.228878118 | 0.350897194 | -0.122019076 | 1   | 556 |
| NA          | chr1  | 75595659  | 75598261  | 0.880849035 | 0.770054967 | 0.110794069  | 12  | 557 |
| KIRREL3-AS3 | chr11 | 126872805 | 126875953 | 0.479883533 | 0.416214058 | 0.063669476  | 9   | 558 |
| NA          | chr5  | 106150898 | 106346715 | 0.615207312 | 0.671039639 | -0.055832327 | 3   | 559 |
| NKX2-5      | chr5  | 172659112 | 172662360 | 0.583210771 | 0.51554489  | 0.067665881  | 15  | 560 |
| WDR5B       | chr3  | 122130715 | 122134882 | 0.157972807 | 0.093171263 | 0.064801544  | 3   | 561 |
| NA          | chr5  | 74161718  | 74163679  | 0.440534764 | 0.386595641 | 0.053939123  | 10  | 562 |
| NA          | chr1  | 26186104  | 26189911  | 0.428730917 | 0.353078314 | 0.075652604  | 3   | 563 |
| NA          | chr16 | 9760742   | 9770700   | 0.710445434 | 0.799622131 | -0.089176697 | 1   | 564 |
| NA          | chr8  | 29384829  | 29387840  | 0.898001222 | 0.79825051  | 0.099750712  | 4   | 565 |
| GNAT1       | chr3  | 50229045  | 50233949  | 0.724357111 | 0.660802681 | 0.06355443   | 7   | 566 |
| NA          | chr8  | 88986393  | 89031341  | 0.401372088 | 0.543638219 | -0.142266131 | 1   | 567 |
| NA          | chr12 | 121407641 | 121410095 | 0.567548029 | 0.513799591 | 0.053748438  | 2   | 568 |
| CNTN4-AS1   | chr3  | 3080717   | 3102829   | 0.59532262  | 0.717451551 | -0.122128931 | 3   | 569 |
| RLN2        | chr9  | 5299868   | 5304969   | 0.588487338 | 0.518006559 | 0.070480778  | 2   | 570 |
| ULBP1       | chr6  | 150285143 | 150294844 | 0.638072784 | 0.558354977 | 0.079717807  | 12  | 571 |
| ATXN8OS     | chr13 | 70681345  | 70713561  | 0.673903504 | 0.57931575  | 0.094587754  | 12  | 572 |
| NA          | chr21 | 46222492  | 46224632  | 0.729896196 | 0.626105552 | 0.103790644  | 1   | 573 |

|              |       |           |           |             |             |              |    |     |
|--------------|-------|-----------|-----------|-------------|-------------|--------------|----|-----|
| NA           | chr7  | 156799001 | 156799826 | 0.889376204 | 0.790541566 | 0.098834638  | 3  | 574 |
| NA           | chr22 | 31742875  | 31744670  | 0.905503607 | 0.792665426 | 0.112838181  | 4  | 575 |
| MIR518C      | chr19 | 54211989  | 54212089  | 0.141911868 | 0.258660866 | -0.116748998 | 1  | 576 |
| RAC2         | chr22 | 37621301  | 37640488  | 0.585248814 | 0.513338877 | 0.071909937  | 6  | 577 |
| NA           | chr16 | 34739464  | 34740833  | 0.715223255 | 0.636337078 | 0.078886177  | 2  | 578 |
| SIX3-AS1     | chr2  | 45167293  | 45169012  | 0.902726974 | 0.803700959 | 0.099026015  | 7  | 579 |
| LINC00596    | chr14 | 24391456  | 24403777  | 0.086816244 | 0.177746874 | -0.09093063  | 1  | 580 |
| IFI30        | chr19 | 18283972  | 18288927  | 0.407579499 | 0.354109377 | 0.053470122  | 13 | 581 |
| NA           | chr2  | 232253687 | 232259702 | 0.897366027 | 0.79879698  | 0.098569047  | 6  | 582 |
| NA           | chr9  | 70921444  | 70945542  | 0.750511334 | 0.669530916 | 0.080980418  | 3  | 583 |
| MIR330       | chr19 | 46142252  | 46142345  | 0.151762802 | 0.098499971 | 0.053262831  | 1  | 584 |
| MIR106B      | chr7  | 99691616  | 99691697  | 0.87321627  | 0.779855105 | 0.093361165  | 2  | 585 |
| IGF2-AS      | chr11 | 2161731   | 2169894   | 0.597810805 | 0.535315804 | 0.062495001  | 35 | 586 |
| TSPY11P      | chrY  | 6134634   | 6137316   | 0.29754117  | 0.242226944 | 0.055314226  | 1  | 587 |
| NA           | chr8  | 82192106  | 82193681  | 0.532654232 | 0.430503595 | 0.102150636  | 13 | 588 |
| TRAF3IP2     | chr6  | 111877657 | 111927481 | 0.547443045 | 0.494345716 | 0.053097328  | 23 | 589 |
| NA           | chr16 | 20754985  | 20777942  | 0.67188954  | 0.618821554 | 0.053067986  | 6  | 590 |
| NA           | chr14 | 105147483 | 105151269 | 0.827038486 | 0.745764841 | 0.081273645  | 4  | 591 |
| ENDOG        | chr9  | 131580753 | 131584956 | 0.658068344 | 0.605025221 | 0.053043122  | 3  | 592 |
| NA           | chr16 | 75446582  | 75498604  | 0.44923216  | 0.386173726 | 0.063058434  | 26 | 593 |
| C21orf128    | chr21 | 43522244  | 43528644  | 0.841705704 | 0.788688219 | 0.053017485  | 5  | 594 |
| HSPB1        | chr7  | 75931861  | 75933612  | 0.635031731 | 0.557652289 | 0.077379441  | 12 | 595 |
| NA           | chr5  | 92355369  | 92404375  | 0.826480411 | 0.740503624 | 0.085976787  | 2  | 596 |
| TRBJ2-6      | chr7  | 142494923 | 142494975 | 0.920383865 | 0.817130117 | 0.103253748  | 1  | 597 |
| NA           | chrX  | 38080644  | 38082920  | 0.742970551 | 0.834358327 | -0.091387776 | 1  | 598 |
| ILVBL        | chr19 | 15225795  | 15236596  | 0.637408277 | 0.578628675 | 0.058779602  | 9  | 599 |
| HAS3         | chr16 | 69139467  | 69152622  | 0.812603846 | 0.742136722 | 0.070467124  | 24 | 600 |
| NA           | chr17 | 30845971  | 30858510  | 0.655592886 | 0.584491014 | 0.071101872  | 5  | 601 |
| DGAT1        | chr8  | 145539954 | 145550573 | 0.56459272  | 0.497513611 | 0.067079109  | 6  | 602 |
| HAUS3        | chr4  | 2229191   | 2243891   | 0.506127809 | 0.558906219 | -0.052778411 | 4  | 603 |
| BOK          | chr2  | 242498136 | 242513546 | 0.780610094 | 0.727864334 | 0.05274576   | 12 | 604 |
| NA           | chr19 | 54292036  | 54292422  | 0.817692871 | 0.723257271 | 0.094435601  | 1  | 605 |
| FAM72D       | chr1  | 143896452 | 143913143 | 0.136009971 | 0.29192288  | -0.155912909 | 1  | 606 |
| NA           | chr6  | 15244154  | 15245231  | 0.722849816 | 0.656030311 | 0.066819505  | 5  | 607 |
| FGF14-AS2    | chr13 | 103046980 | 103048053 | 0.532427141 | 0.594040525 | -0.061613384 | 5  | 608 |
| NA           | chr2  | 162929766 | 162931679 | 0.539772739 | 0.487091704 | 0.052681035  | 12 | 609 |
| C9orf96      | chr9  | 136243117 | 136271220 | 0.59434705  | 0.538478857 | 0.055868193  | 6  | 610 |
| HIST1H2APS4  | chr6  | 26272421  | 26272768  | 0.743194504 | 0.664638717 | 0.078555788  | 3  | 611 |
| FOXD4L5      | chr9  | 70175707  | 70178815  | 0.716300569 | 0.638042846 | 0.078257723  | 1  | 612 |
| TREH         | chr11 | 118528026 | 118550399 | 0.73545125  | 0.68281665  | 0.0526346    | 5  | 613 |
| GPR62        | chr3  | 51989330  | 51991509  | 0.863190678 | 0.772985145 | 0.090205533  | 6  | 614 |
| C15orf62     | chr15 | 41062159  | 41064643  | 0.799875905 | 0.721432791 | 0.078443115  | 3  | 615 |
| OR6C74       | chr12 | 55640982  | 55642086  | 0.20178514  | 0.386853112 | -0.185067972 | 1  | 616 |
| NA           | chr5  | 131347141 | 131348892 | 0.429764007 | 0.364078977 | 0.06568503   | 10 | 617 |
| C9orf135-AS1 | chr9  | 72433899  | 72435655  | 0.932620149 | 0.833979104 | 0.098641045  | 3  | 618 |
| NA           | chr1  | 13839715  | 13842765  | 0.654096141 | 0.569679435 | 0.084416706  | 7  | 619 |
| NA           | chr19 | 3558013   | 3558484   | 0.648073159 | 0.577390386 | 0.070682773  | 1  | 620 |
| RPSAP58      | chr19 | 23945807  | 24010937  | 0.397848286 | 0.298794814 | 0.099053472  | 3  | 621 |
| CD79B        | chr17 | 62006100  | 62009714  | 0.852730712 | 0.762527354 | 0.090203358  | 7  | 622 |
| SMKR1        | chr7  | 129142320 | 129152773 | 0.776560609 | 0.707878011 | 0.068682598  | 5  | 623 |
| KCNJ9        | chr1  | 160051360 | 160060353 | 0.712400312 | 0.6378261   | 0.074574212  | 10 | 624 |
| HIST1H3F     | chr6  | 26250370  | 26250835  | 0.903297779 | 0.805301293 | 0.097996486  | 4  | 625 |
| OR5T1        | chr11 | 56043029  | 56044146  | 0.31749569  | 0.445008557 | -0.127512867 | 2  | 626 |
| NA           | chr20 | 61052926  | 61053650  | 0.82442641  | 0.735135969 | 0.089290441  | 1  | 627 |
| NA           | chr9  | 101705619 | 101706057 | 0.516624571 | 0.441605204 | 0.075019367  | 4  | 628 |
| NA           | chr14 | 29198289  | 29234483  | 0.866369823 | 0.773788905 | 0.092580918  | 15 | 629 |
| RAB15        | chr14 | 65412532  | 65439494  | 0.48288042  | 0.428651457 | 0.054228962  | 13 | 630 |
| NA           | chr12 | 67834778  | 67836339  | 0.131975382 | 0.063670713 | 0.068304669  | 1  | 631 |
| PYCARD       | chr16 | 31212806  | 31214771  | 0.879700021 | 0.776012159 | 0.103687863  | 15 | 632 |
| NA           | chr2  | 52600256  | 52617150  | 0.370257182 | 0.474955568 | -0.104698386 | 1  | 633 |
| MIR140       | chr16 | 69966984  | 69967083  | 0.935662406 | 0.835269031 | 0.100393375  | 1  | 634 |
| FOXD2-AS1    | chr1  | 47897805  | 47900313  | 0.809381909 | 0.726745531 | 0.082636377  | 11 | 635 |
| IRX1         | chr5  | 3596168   | 3601517   | 0.517234101 | 0.443070746 | 0.074163355  | 16 | 636 |
| NA           | chr4  | 158125614 | 158126007 | 0.16645024  | 0.234942823 | -0.068492583 | 2  | 637 |
| NA           | chr11 | 111284967 | 111288911 | 0.931798021 | 0.8153955   | 0.116402521  | 1  | 638 |
| LRRFIP1P1    | chr3  | 178976816 | 178979061 | 0.750623508 | 0.679710092 | 0.070913415  | 7  | 639 |
| ADRB1        | chr10 | 115803806 | 115806667 | 0.615152335 | 0.549501199 | 0.065651136  | 7  | 640 |
| NA           | chr15 | 25272883  | 25277194  | 0.345697056 | 0.451701597 | -0.106004541 | 1  | 641 |
| NA           | chr10 | 134774844 | 134775741 | 0.842539168 | 0.75305057  | 0.089488598  | 2  | 642 |
| UCP1         | chr4  | 141480588 | 141489959 | 0.799716827 | 0.7042795   | 0.095437327  | 6  | 643 |
| KRTAP10-4    | chr21 | 45993606  | 45994987  | 0.901376807 | 0.805137521 | 0.096239286  | 1  | 644 |
| NA           | chr5  | 9546312   | 9550721   | 0.563983153 | 0.51230286  | 0.051680293  | 11 | 645 |



|            |       |           |           |             |             |              |    |     |
|------------|-------|-----------|-----------|-------------|-------------|--------------|----|-----|
| HM13-AS1   | chr20 | 30155510  | 30161066  | 0.523908725 | 0.472234947 | 0.051673777  | 4  | 646 |
| NA         | chr16 | 31720434  | 31723305  | 0.847178245 | 0.765925569 | 0.081252677  | 2  | 647 |
| SDC4P      | chr22 | 30877298  | 30877898  | 0.752530912 | 0.672164038 | 0.080366874  | 1  | 648 |
| RGS13      | chr1  | 192605275 | 192629390 | 0.62205185  | 0.724602987 | -0.102551137 | 3  | 649 |
| TECTB      | chr10 | 114043493 | 114064793 | 0.784213613 | 0.863033525 | -0.078819913 | 2  | 650 |
| LIME1      | chr20 | 62366815  | 62370456  | 0.841163554 | 0.754532761 | 0.086630793  | 16 | 651 |
| NA         | chr14 | 60981837  | 61021634  | 0.838764977 | 0.731716011 | 0.107048966  | 7  | 652 |
| NA         | chr16 | 2907899   | 2909727   | 0.724499841 | 0.646071756 | 0.078428085  | 8  | 653 |
| NA         | chr9  | 117159004 | 117160783 | 0.622909144 | 0.571506274 | 0.05140287   | 3  | 654 |
| TAC1       | chr7  | 97361220  | 97369784  | 0.66697097  | 0.538571504 | 0.128399466  | 10 | 655 |
| TREX1      | chr3  | 48506445  | 48509044  | 0.837401385 | 0.750988308 | 0.086413078  | 11 | 656 |
| UPK1A-AS1  | chr19 | 36158850  | 36164193  | 0.743652397 | 0.657557856 | 0.08609454   | 2  | 657 |
| ZNF671     | chr19 | 58231119  | 58238992  | 0.78458741  | 0.710644846 | 0.073942563  | 7  | 658 |
| NA         | chr3  | 80810193  | 80838114  | 0.56562087  | 0.656220429 | -0.090599559 | 3  | 659 |
| NA         | chr3  | 80814048  | 80838505  | 0.56562087  | 0.656220429 | -0.090599559 | 3  | 660 |
| NA         | chr2  | 51429219  | 51448902  | 0.274629364 | 0.480931836 | -0.206302472 | 1  | 661 |
| KRTAP5-1   | chr11 | 1605572   | 1606513   | 0.878291497 | 0.785468271 | 0.092823226  | 1  | 662 |
| FAM215A    | chr17 | 41994576  | 41995326  | 0.908982632 | 0.813955911 | 0.095026721  | 2  | 663 |
| NA         | chr16 | 49476821  | 49487989  | 0.905704549 | 0.810143667 | 0.095560881  | 1  | 664 |
| PCDH8P1    | chr13 | 53774116  | 53776547  | 0.838308822 | 0.754942028 | 0.083366795  | 9  | 665 |
| WNT10A     | chr2  | 219745085 | 219764303 | 0.637508212 | 0.586560298 | 0.050947915  | 31 | 666 |
| SUMO3      | chr21 | 46225532  | 46238694  | 0.704100451 | 0.653171275 | 0.050929176  | 9  | 667 |
| LINC00525  | chr7  | 47801074  | 47806370  | 0.488972232 | 0.319095233 | 0.169876999  | 1  | 668 |
| NA         | chr17 | 69093916  | 69198318  | 0.759779032 | 0.858027102 | -0.098248071 | 1  | 669 |
| NPBWR1     | chr8  | 53850991  | 53853677  | 0.696928058 | 0.590980763 | 0.105947295  | 15 | 670 |
| NA         | chr7  | 129423210 | 129425025 | 0.882252622 | 0.79024014  | 0.092012482  | 5  | 671 |
| SLC25A22   | chr11 | 790475    | 798316    | 0.670792538 | 0.620046996 | 0.050745542  | 22 | 672 |
| HIST1H1D   | chr6  | 26234440  | 26235216  | 0.565889724 | 0.466023727 | 0.099865997  | 3  | 673 |
| LBX2-AS1   | chr2  | 74729722  | 74731805  | 0.707384176 | 0.637926561 | 0.069457615  | 15 | 674 |
| NA         | chr20 | 37590568  | 37590754  | 0.253937099 | 0.085569357 | 0.168367742  | 1  | 675 |
| EIF4EBP3   | chr5  | 139927251 | 139929163 | 0.872065596 | 0.775871479 | 0.096194117  | 4  | 676 |
| MED18      | chr1  | 28655513  | 28662476  | 0.457862737 | 0.406828324 | 0.051034413  | 6  | 677 |
| NA         | chr11 | 91527528  | 91545460  | 0.946433604 | 0.847295176 | 0.099138427  | 1  | 678 |
| NA         | chr7  | 76875657  | 76887440  | 0.714196891 | 0.797820261 | -0.08362337  | 1  | 679 |
| NA         | chr1  | 846815    | 850328    | 0.863552819 | 0.77711651  | 0.086436308  | 6  | 680 |
| HOXD1      | chr2  | 177053307 | 177055688 | 0.605843495 | 0.52187135  | 0.083972145  | 8  | 681 |
| OR2T10     | chr1  | 248756052 | 248757100 | 0.399448631 | 0.523498865 | -0.124050234 | 1  | 682 |
| NA         | chr19 | 42636707  | 42641251  | 0.714786877 | 0.660091308 | 0.054695569  | 9  | 683 |
| NA         | chr9  | 100148522 | 100158394 | 0.869985435 | 0.789295872 | 0.080689563  | 2  | 684 |
| NA         | chr4  | 81104434  | 81111323  | 0.69497831  | 0.613737573 | 0.081240737  | 23 | 685 |
| NA         | chr9  | 132192931 | 132213701 | 0.668281137 | 0.607167614 | 0.061113524  | 10 | 686 |
| SNORD116-9 | chr15 | 25318254  | 25318348  | 0.715447506 | 0.798754223 | -0.083306718 | 1  | 687 |
| NA         | chr11 | 28700730  | 28705016  | 0.615849072 | 0.759123958 | -0.143274886 | 1  | 688 |
| SLITRK5    | chr13 | 88324870  | 88331871  | 0.605128756 | 0.54192073  | 0.063208026  | 20 | 689 |
| NA         | chr1  | 173991647 | 173992123 | 0.144050409 | 0.093837285 | 0.050213124  | 2  | 690 |
| LRRC32     | chr11 | 76368568  | 76381791  | 0.796240626 | 0.720905358 | 0.075335268  | 18 | 691 |
| SNAI3      | chr16 | 88744090  | 88752901  | 0.751464174 | 0.701276482 | 0.050187693  | 11 | 692 |
| NA         | chr8  | 125313556 | 125314045 | 0.619167446 | 0.680742139 | -0.061574692 | 3  | 693 |
| NA         | chr5  | 139152113 | 139154991 | 0.500168377 | 0.436508263 | 0.063660113  | 1  | 694 |
| NA         | chr7  | 10980050  | 10980362  | 0.119333073 | 0.065873508 | 0.053459565  | 2  | 695 |
| NA         | chr19 | 14141667  | 14142369  | 0.844314116 | 0.764234884 | 0.080079232  | 4  | 696 |
| LINC00923  | chr15 | 98285448  | 98417780  | 0.904890751 | 0.79145062  | 0.11344013   | 2  | 697 |
| NA         | chr4  | 3760475   | 3765117   | 0.935560206 | 0.838529595 | 0.097030611  | 1  | 698 |
| NA         | chr1  | 75593515  | 75598743  | 0.864871816 | 0.766078154 | 0.098793662  | 23 | 699 |
| NA         | chr2  | 175190755 | 175195371 | 0.839822606 | 0.737140296 | -0.10268231  | 18 | 700 |
| NA         | chr21 | 34619079  | 34656082  | 0.500872361 | 0.450060736 | 0.050811625  | 14 | 701 |
| FBXO6      | chr1  | 11724181  | 11734411  | 0.664264839 | 0.605603362 | 0.058661477  | 10 | 702 |
| NA         | chr11 | 115509281 | 115517680 | 0.92117733  | 0.825795982 | 0.095381347  | 2  | 703 |
| TRIM48     | chr11 | 55029658  | 55038595  | 0.740102925 | 0.82570408  | -0.085601155 | 1  | 704 |
| C11orf68   | chr11 | 65684279  | 65686588  | 0.606586822 | 0.556550601 | 0.05003622   | 12 | 705 |
| ZC3H12A    | chr1  | 37940153  | 37949980  | 0.716023845 | 0.656065808 | 0.059958037  | 12 | 706 |
| NA         | chr13 | 25767245  | 25784433  | 0.932572384 | 0.836169938 | 0.096402446  | 1  | 707 |
| NA         | chr8  | 38409766  | 38416538  | 0.731736783 | 0.618867045 | 0.112869738  | 4  | 708 |
| NA         | chr11 | 1784239   | 1784979   | 0.791688022 | 0.709750475 | 0.081937547  | 1  | 709 |
| LINC00619  | chr10 | 44340754  | 44346070  | 0.904387083 | 0.810945988 | 0.093441094  | 1  | 710 |
| NA         | chr7  | 8301894   | 8384146   | 0.696553207 | 0.640741696 | 0.055811511  | 15 | 711 |
| C21orf90   | chr21 | 45937099  | 45945835  | 0.88617411  | 0.802100177 | 0.084073933  | 2  | 712 |
| NA         | chr11 | 25756317  | 25803305  | 0.262209048 | 0.35854045  | -0.096331403 | 1  | 713 |
| NA         | chr12 | 124456004 | 124456261 | 0.562613045 | 0.49321588  | 0.069397165  | 1  | 714 |
| SPIN3      | chrX  | 57002803  | 57021970  | 0.505241614 | 0.55502979  | -0.049788176 | 5  | 715 |
| DMRTC1     | chrX  | 72091859  | 72163653  | 0.803454904 | 0.720560478 | 0.082894426  | 1  | 716 |
| NA         | chr11 | 65222728  | 65234028  | 0.877928715 | 0.792465895 | 0.08546282   | 3  | 717 |

|           |       |           |           |             |             |              |    |     |
|-----------|-------|-----------|-----------|-------------|-------------|--------------|----|-----|
| PARD3-AS1 | chr10 | 35104695  | 35105314  | 0.404066763 | 0.345858801 | 0.058207962  | 3  | 718 |
| GSTTP2    | chr22 | 24385938  | 24401899  | 0.78373972  | 0.85545354  | -0.07171382  | 2  | 719 |
| NA        | chr15 | 23095170  | 23115256  | 0.841862822 | 0.754848824 | 0.087013998  | 3  | 720 |
| NEUROD2   | chr17 | 37759789  | 37766030  | 0.544077883 | 0.482432267 | 0.061645616  | 29 | 721 |
| NA        | chr16 | 51051669  | 51069688  | 0.91193117  | 0.820701989 | 0.091229181  | 2  | 722 |
| NA        | chr22 | 37621304  | 37622035  | 0.799794883 | 0.717441653 | 0.08235323   | 1  | 723 |
| TMEM141   | chr9  | 139685807 | 139695010 | 0.490766113 | 0.441190215 | 0.049575898  | 10 | 724 |
| NA        | chr17 | 18541332  | 18541683  | 0.633435654 | 0.56804827  | 0.065387384  | 1  | 725 |
| LHX3      | chr9  | 139088096 | 139096955 | 0.795282059 | 0.723911431 | 0.071370628  | 25 | 726 |
| FABP5     | chr8  | 82192598  | 82197012  | 0.485141572 | 0.39876787  | 0.086373702  | 13 | 727 |
| IRX4      | chr5  | 1877541   | 1887350   | 0.731656027 | 0.65784357  | 0.073812457  | 38 | 728 |
| FTMT      | chr5  | 121187650 | 121188519 | 0.648292586 | 0.742618934 | -0.094326347 | 2  | 729 |
| ITGA5     | chr12 | 54789045  | 54813244  | 0.456449233 | 0.403491794 | 0.052957439  | 12 | 730 |
| SLC51B    | chr15 | 65337708  | 65345734  | 0.788954721 | 0.718006798 | 0.070947923  | 11 | 731 |
| LINC00654 | chr20 | 5476713   | 5485259   | 0.826407487 | 0.742159604 | 0.084247883  | 2  | 732 |
| NA        | chr12 | 127094580 | 127174864 | 0.627063862 | 0.737254182 | -0.110190319 | 1  | 733 |
| HIST1H2BE | chr6  | 26183958  | 26184454  | 0.798998789 | 0.717121767 | 0.081877022  | 3  | 734 |
| NA        | chr15 | 41128006  | 41136585  | 0.710244478 | 0.63978354  | 0.070460938  | 12 | 735 |
| NA        | chr16 | 18814405  | 18823503  | 0.55551004  | 0.486350157 | 0.069159883  | 1  | 736 |
| MIR3655   | chr5  | 140027429 | 140027511 | 0.080864982 | 0.130177454 | -0.049312472 | 1  | 737 |
| NA        | chr1  | 1980642   | 1981509   | 0.623196357 | 0.544831393 | 0.078364964  | 3  | 738 |
| HIST1H2AI | chr6  | 27775899  | 27776429  | 0.336602573 | 0.28730451  | 0.049298063  | 4  | 739 |
| SIGLEC8   | chr19 | 51954101  | 51961710  | 0.419533631 | 0.527815909 | -0.108282279 | 3  | 740 |
| SLC16A13  | chr17 | 6939394   | 6943440   | 0.752992577 | 0.686103243 | 0.066889334  | 4  | 741 |
| NA        | chr2  | 103583866 | 103600887 | 0.382020316 | 0.314873339 | 0.067146977  | 1  | 742 |
| ZBTB26    | chr9  | 125677845 | 125693779 | 0.70974088  | 0.66050329  | 0.04923759   | 3  | 743 |
| PLIN4     | chr19 | 4502204   | 4517716   | 0.930197839 | 0.842516677 | 0.087681162  | 3  | 744 |
| KREMEN1   | chr22 | 29469066  | 29564321  | 0.790489862 | 0.723268209 | 0.067221653  | 8  | 745 |
| NA        | chr10 | 135341026 | 135342661 | 0.768513776 | 0.707772378 | 0.060741399  | 8  | 746 |
| NA        | chr2  | 155292365 | 155313950 | 0.349520811 | 0.213789483 | 0.135731328  | 1  | 747 |
| PROM1     | chr4  | 15964699  | 16086001  | 0.77523251  | 0.710946563 | 0.064285947  | 33 | 748 |
| NA        | chr12 | 109022463 | 109035094 | 0.839807843 | 0.757143316 | 0.082664527  | 9  | 749 |
| NA        | chr17 | 55169506  | 55173786  | 0.936280967 | 0.840804769 | 0.095476198  | 1  | 750 |
| NA        | chr1  | 9242263   | 9252148   | 0.830142082 | 0.751810905 | 0.078331177  | 8  | 751 |
| SNAP29    | chr22 | 21213271  | 21245502  | 0.487565882 | 0.43736957  | 0.050196312  | 7  | 752 |
| NA        | chr3  | 179367282 | 179367988 | 0.49887371  | 0.555956598 | -0.057082888 | 1  | 753 |
| RPP25     | chr15 | 75246757  | 75249805  | 0.600809293 | 0.540012287 | 0.060797006  | 7  | 754 |
| NA        | chr11 | 125128522 | 125136694 | 0.700981332 | 0.624372097 | 0.076609235  | 5  | 755 |
| LTB       | chr6  | 31548302  | 31550299  | 0.623069396 | 0.561895381 | 0.061174015  | 30 | 756 |
| BARHL1    | chr9  | 135457572 | 135465653 | 0.882998355 | 0.79303056  | 0.089967795  | 14 | 757 |
| NA        | chr11 | 318640    | 325631    | 0.728213619 | 0.672444021 | 0.055769598  | 17 | 758 |
| NA        | chr5  | 9363387   | 9422593   | 0.364001476 | 0.476946177 | -0.112944701 | 3  | 759 |
| NA        | chr5  | 167364722 | 167380474 | 0.590432979 | 0.682783251 | -0.092350272 | 1  | 760 |
| MIR663A   | chr20 | 26167556  | 26232162  | 0.717735249 | 0.659091092 | 0.058644157  | 16 | 761 |
| SSMEM1    | chr7  | 129847700 | 129856683 | 0.677739834 | 0.75705203  | -0.079312196 | 3  | 762 |
| CYTH4     | chr22 | 37678068  | 37711382  | 0.733362069 | 0.660181869 | 0.0731802    | 9  | 763 |
| NA        | chr7  | 44998598  | 45000508  | 0.804377545 | 0.895437533 | -0.091059988 | 1  | 764 |
| WWC2-AS2  | chr4  | 184018170 | 184020352 | 0.602816181 | 0.544021605 | 0.058794576  | 6  | 765 |
| CLUHP4    | chr4  | 190979057 | 190984160 | 0.479078469 | 0.661712548 | -0.182634079 | 1  | 766 |
| TMC6      | chr17 | 76106539  | 76128488  | 0.7155544   | 0.658502781 | 0.057051619  | 27 | 767 |
| MATK      | chr19 | 3777971   | 3802127   | 0.513110656 | 0.456147633 | 0.056963024  | 21 | 768 |
| NA        | chr1  | 11837134  | 11839676  | 0.872082683 | 0.783618313 | 0.08846437   | 1  | 769 |
| NA        | chr4  | 99580055  | 99585701  | 0.628633047 | 0.579733848 | 0.048899198  | 7  | 770 |
| NA        | chr5  | 126087655 | 126112178 | 0.829905031 | 0.759394204 | 0.070510827  | 2  | 771 |
| CCL8      | chr17 | 32646055  | 32648421  | 0.837127409 | 0.76093496  | 0.07619245   | 2  | 772 |
| TMSB4X    | chrX  | 12993227  | 12995346  | 0.141991768 | 0.250225784 | -0.108234016 | 3  | 773 |
| NA        | chr19 | 33157204  | 33164116  | 0.762653411 | 0.68524362  | 0.077409791  | 1  | 774 |
| NA        | chr7  | 102067265 | 102075227 | 0.511448074 | 0.444614649 | 0.066833426  | 10 | 775 |
| NA        | chr16 | 28986294  | 28990145  | 0.682435274 | 0.614445282 | 0.067989993  | 6  | 776 |
| NA        | chr12 | 49315767  | 49333446  | 0.760237351 | 0.68769133  | 0.072546021  | 22 | 777 |
| SELL      | chr1  | 169659808 | 169680839 | 0.734439438 | 0.645267923 | 0.089171515  | 4  | 778 |
| RNA5SP155 | chr4  | 10117380  | 10117508  | 0.913354374 | 0.821046744 | 0.09230763   | 1  | 779 |
| NA        | chr1  | 41708045  | 41750533  | 0.430681606 | 0.381950671 | 0.048730935  | 5  | 780 |
| TMEM72    | chr10 | 45406648  | 45432450  | 0.581708567 | 0.508192497 | 0.07351607   | 5  | 781 |
| MIR142    | chr17 | 56408245  | 56409869  | 0.868530545 | 0.784030211 | 0.084500334  | 8  | 782 |
| NA        | chr11 | 62304784  | 62309490  | 0.78021005  | 0.730890033 | 0.049320017  | 5  | 783 |
| NA        | chr15 | 78285747  | 78287631  | 0.636211903 | 0.581474793 | 0.054737111  | 5  | 784 |
| MAP7D2    | chrX  | 20024831  | 20135035  | 0.72137886  | 0.659951208 | 0.061427653  | 12 | 785 |
| NA        | chrX  | 28589649  | 28604512  | 0.537304233 | 0.626124294 | -0.08882006  | 1  | 786 |
| MAT1A     | chr10 | 82031576  | 82049440  | 0.686557235 | 0.735100934 | -0.048543698 | 4  | 787 |
| STK24-AS1 | chr13 | 99229498  | 99231084  | 0.526609392 | 0.478105243 | 0.04850415   | 4  | 788 |
| NA        | chr1  | 37920480  | 37940012  | 0.446021338 | 0.397527587 | 0.048493752  | 9  | 789 |

|           |       |           |           |             |             |              |    |     |
|-----------|-------|-----------|-----------|-------------|-------------|--------------|----|-----|
| NA        | chr3  | 128764606 | 128765764 | 0.901837834 | 0.815662801 | 0.086175033  | 4  | 790 |
| MEIS1-AS1 | chr2  | 66666575  | 66668968  | 0.862430269 | 0.74242495  | 0.12000532   | 12 | 791 |
| NA        | chr4  | 13547699  | 13549425  | 0.818709582 | 0.734000698 | 0.084708884  | 5  | 792 |
| NA        | chr20 | 21378456  | 21381029  | 0.830626907 | 0.748398243 | 0.082228664  | 2  | 793 |
| XIAP      | chrX  | 122993574 | 123047829 | 0.522142802 | 0.47337135  | 0.048771452  | 16 | 794 |
| NA        | chr10 | 118918167 | 118928570 | 0.643095866 | 0.576161283 | 0.066934583  | 28 | 795 |
| CNTNAP3B  | chr9  | 43684902  | 43924049  | 0.849353078 | 0.771308517 | 0.078044561  | 3  | 796 |
| OR1Q1     | chr9  | 125376948 | 125378026 | 0.553836733 | 0.639890806 | -0.086054073 | 2  | 797 |
| NA        | chr12 | 65153301  | 65173098  | 0.487671447 | 0.439332287 | 0.04833916   | 8  | 798 |
| RIPK3     | chr14 | 24805227  | 24809251  | 0.875245906 | 0.788908158 | 0.086337748  | 9  | 799 |
| POU3F1    | chr1  | 38509523  | 38512450  | 0.643249208 | 0.584638402 | 0.058610806  | 12 | 800 |
| EN1       | chr2  | 119599747 | 119605254 | 0.741182948 | 0.647779402 | 0.093403547  | 30 | 801 |
| ZNF619    | chr3  | 40518604  | 40531727  | 0.557771623 | 0.471097224 | 0.086674399  | 8  | 802 |
| SPATA41   | chr15 | 100884662 | 100890438 | 0.840848018 | 0.763250883 | 0.077597134  | 8  | 803 |
| NA        | chr1  | 2512999   | 2515972   | 0.730261788 | 0.788284438 | -0.058022649 | 2  | 804 |
| DFNB59    | chr2  | 179316163 | 179326117 | 0.55675962  | 0.461587964 | 0.095171656  | 5  | 805 |
| NTF4      | chr19 | 49559050  | 49568333  | 0.656133089 | 0.597030122 | 0.059102966  | 17 | 806 |
| BHLHE22   | chr8  | 65492814  | 65496181  | 0.375102531 | 0.282629845 | 0.092472686  | 7  | 807 |
| VMO1      | chr17 | 4688580   | 4689728   | 0.879603885 | 0.79247634  | 0.087127545  | 7  | 808 |
| TNFSF12   | chr17 | 7452208   | 7464925   | 0.665920667 | 0.595216667 | 0.070704     | 20 | 809 |
| HIST1H3H  | chr6  | 27777842  | 27778314  | 0.778304841 | 0.701454236 | 0.076850605  | 3  | 810 |
| THBD      | chr20 | 23026270  | 23030378  | 0.680306863 | 0.615545875 | 0.064760988  | 10 | 811 |
| CTSZ      | chr20 | 57570240  | 57582302  | 0.777727591 | 0.71110444  | 0.066623151  | 10 | 812 |
| LINC00939 | chr12 | 126443234 | 126467920 | 0.096799059 | 0.289771453 | -0.192972394 | 1  | 813 |
| NA        | chr1  | 150521897 | 150524367 | 0.845876717 | 0.77885262  | 0.067024097  | 5  | 814 |
| PPM1M     | chr3  | 52279841  | 52284613  | 0.780321632 | 0.714571818 | 0.065749814  | 10 | 815 |
| PRB4      | chr12 | 11460017  | 11463369  | 0.368875312 | 0.467936763 | -0.099061451 | 2  | 816 |
| LBX2      | chr2  | 74724644  | 74730443  | 0.825701387 | 0.745640491 | 0.080060896  | 22 | 817 |
| CD86      | chr3  | 121774213 | 121839983 | 0.860821191 | 0.791264398 | 0.069556792  | 12 | 818 |
| HIST1H2BK | chr6  | 27106073  | 27114619  | 0.764721157 | 0.700596799 | 0.064124358  | 16 | 819 |
| HCG9P5    | chr6  | 29716066  | 29716290  | 0.314802917 | 0.267222436 | 0.047580482  | 5  | 820 |
| DEXI      | chr16 | 11022748  | 11036317  | 0.563333292 | 0.515780304 | 0.047552988  | 7  | 821 |
| ATP6V0CP3 | chr6  | 42694972  | 42695438  | 0.776110908 | 0.704191049 | 0.071919859  | 3  | 822 |
| FBLN1     | chr22 | 45898118  | 45997015  | 0.676877776 | 0.629389296 | 0.04748848   | 12 | 823 |
| NA        | chr2  | 91911049  | 91911631  | 0.835618521 | 0.75298256  | 0.08263596   | 1  | 824 |
| TMPRSS13  | chr11 | 117771358 | 117800174 | 0.729871399 | 0.777329571 | -0.047458172 | 6  | 825 |
| SPATA2P1  | chr13 | 56788507  | 56791076  | 0.31827068  | 0.422796377 | -0.104525697 | 1  | 826 |
| NA        | chr7  | 155192617 | 155194477 | 0.794023745 | 0.721252562 | 0.072771183  | 3  | 827 |
| ZNF415    | chr19 | 53611132  | 53636330  | 0.638795263 | 0.577300469 | 0.061494794  | 10 | 828 |
| NA        | chr11 | 110225855 | 110277124 | 0.76753696  | 0.692370016 | 0.075166944  | 2  | 829 |
| RAMP2-AS1 | chr17 | 40905932  | 40913275  | 0.805274248 | 0.736137762 | 0.069136486  | 6  | 830 |
| KIAA1324  | chr1  | 109656301 | 109749401 | 0.775205627 | 0.705480844 | 0.069724783  | 15 | 831 |
| EMX1      | chr2  | 73143389  | 73162020  | 0.756338389 | 0.681139842 | 0.075198547  | 29 | 832 |
| NKAIN1P1  | chr1  | 148864594 | 148865175 | 0.818857013 | 0.738085605 | 0.080771407  | 2  | 833 |
| APOL1     | chr22 | 36649056  | 36663576  | 0.715500791 | 0.649329902 | 0.066170889  | 5  | 834 |
| RBP7      | chr1  | 10057264  | 10076078  | 0.630382445 | 0.567109569 | 0.063272875  | 8  | 835 |
| RMND1     | chr6  | 151725989 | 151773259 | 0.603263123 | 0.556075101 | 0.047188022  | 7  | 836 |
| NA        | chr17 | 14198829  | 14200917  | 0.639380926 | 0.544043278 | 0.095337647  | 3  | 837 |
| NA        | chr12 | 116019866 | 116077539 | 0.868216062 | 0.789826181 | 0.078389882  | 7  | 838 |
| FAM195B   | chr17 | 79780287  | 79791178  | 0.484104734 | 0.436830343 | 0.047274392  | 6  | 839 |
| NA        | chr15 | 37168580  | 37179236  | 0.783367864 | 0.700194855 | 0.083173009  | 24 | 840 |
| NA        | chr12 | 52214243  | 52216199  | 0.700262853 | 0.635351255 | 0.064911598  | 6  | 841 |
| NA        | chr2  | 131501111 | 131513452 | 0.876493027 | 0.795055014 | 0.081438013  | 14 | 842 |
| LAT       | chr16 | 28996147  | 29002104  | 0.857455813 | 0.775053575 | 0.082402238  | 9  | 843 |
| BPESC1    | chr3  | 138823027 | 138844009 | 0.707125645 | 0.647992988 | 0.059132656  | 3  | 844 |
| NA        | chr1  | 235115394 | 235116551 | 0.797583367 | 0.71946423  | 0.078119137  | 1  | 845 |
| NA        | chr7  | 56243327  | 56244105  | 0.952459833 | 0.859470747 | 0.092989086  | 1  | 846 |
| DEFB118   | chr20 | 29956421  | 29961726  | 0.464512851 | 0.412505863 | 0.052006987  | 2  | 847 |
| TSPY15P   | chrY  | 9385717   | 9388290   | 0.469421164 | 0.520588662 | -0.051167498 | 1  | 848 |
| CHD1L     | chr1  | 146714291 | 146767443 | 0.433125177 | 0.386282179 | 0.046842997  | 13 | 849 |
| FAM71E2   | chr19 | 55866276  | 55874628  | 0.693958142 | 0.647121538 | 0.046836603  | 20 | 850 |
| KRT27     | chr17 | 38933060  | 38938786  | 0.787284657 | 0.731451227 | 0.05583343   | 8  | 851 |
| CSF1      | chr1  | 110452864 | 110473614 | 0.503268515 | 0.456449265 | 0.04681925   | 12 | 852 |
| NA        | chr15 | 89878284  | 89879392  | 0.47697001  | 0.407749239 | 0.069220771  | 3  | 853 |
| HOXD4     | chr2  | 177015950 | 177017954 | 0.912110563 | 0.824143147 | 0.087967416  | 13 | 854 |
| PAPPA-AS2 | chr9  | 119048108 | 119051048 | 0.257504549 | 0.329156147 | -0.071651598 | 1  | 855 |
| ANXA2R    | chr5  | 43039335  | 43043272  | 0.206410829 | 0.159742593 | 0.046668236  | 23 | 856 |
| NA        | chr16 | 74701404  | 74702604  | 0.740138194 | 0.681993638 | 0.058144556  | 3  | 857 |
| OR2M3     | chr1  | 248366332 | 248367392 | 0.272163805 | 0.424095015 | -0.15193121  | 3  | 858 |
| NA        | chr5  | 121464457 | 121490551 | 0.811073903 | 0.747795473 | 0.06327843   | 4  | 859 |
| RAB21     | chr12 | 72148654  | 72184699  | 0.356090576 | 0.309615707 | 0.046474869  | 8  | 860 |
| CLDN3     | chr7  | 73183328  | 73184600  | 0.787974227 | 0.712706908 | 0.07526732   | 4  | 861 |

|            |       |           |           |             |             |              |    |     |
|------------|-------|-----------|-----------|-------------|-------------|--------------|----|-----|
| CD52       | chr1  | 26644448  | 26647014  | 0.870731184 | 0.787498054 | 0.083233129  | 7  | 862 |
| TNFSF13    | chr17 | 7461609   | 7464925   | 0.561670526 | 0.472098024 | 0.089572502  | 6  | 863 |
| NA         | chr5  | 87008952  | 87029086  | 0.854123996 | 0.771429616 | 0.08269438   | 1  | 864 |
| NA         | chr3  | 110246329 | 110248429 | 0.370063783 | 0.451850022 | -0.08178624  | 1  | 865 |
| ZNF727     | chr7  | 63505821  | 63538927  | 0.162167593 | 0.255780779 | -0.093613186 | 4  | 866 |
| NA         | chr7  | 63505821  | 63539697  | 0.162167593 | 0.255780779 | -0.093613186 | 4  | 867 |
| CCNO       | chr5  | 54526980  | 54529508  | 0.503261795 | 0.424650652 | 0.078611144  | 13 | 868 |
| RNASEH1P2  | chr17 | 16586752  | 16587541  | 0.920813517 | 0.834705999 | 0.086107518  | 2  | 869 |
| PRKACG     | chr9  | 71627469  | 71629039  | 0.557333229 | 0.603564953 | -0.046231724 | 2  | 870 |
| SLC22A17   | chr14 | 23815515  | 23822121  | 0.68610379  | 0.63988256  | 0.04622123   | 16 | 871 |
| AGPAT2     | chr9  | 139567595 | 139581875 | 0.723265354 | 0.666486674 | 0.056778681  | 9  | 872 |
| IL2RB      | chr22 | 37521878  | 37571094  | 0.796930192 | 0.727335483 | 0.069594709  | 9  | 873 |
| NA         | chr1  | 103228878 | 103319398 | 0.269825698 | 0.407363522 | -0.137537824 | 1  | 874 |
| CFC1B      | chr2  | 131278770 | 131285579 | 0.866649932 | 0.78304327  | 0.083606662  | 1  | 875 |
| IZUMO1     | chr19 | 49244109  | 49250166  | 0.783170874 | 0.737008147 | 0.046162728  | 7  | 876 |
| DNAJC17    | chr15 | 41060067  | 41099675  | 0.692444517 | 0.644076764 | 0.048367753  | 22 | 877 |
| NA         | chr5  | 87988468  | 87988676  | 0.90732426  | 0.790210489 | 0.117113771  | 2  | 878 |
| APOA1      | chr11 | 116706467 | 116708666 | 0.748785623 | 0.696081791 | 0.052703832  | 9  | 879 |
| PCDHGC5    | chr5  | 140868808 | 140892546 | 0.829638821 | 0.755089907 | 0.074548914  | 14 | 880 |
| SLC7A5P1   | chr16 | 29624425  | 29624961  | 0.455811522 | 0.409747901 | 0.046063621  | 2  | 881 |
| PRLHR      | chr10 | 120352916 | 120355160 | 0.787330389 | 0.710862515 | 0.076467874  | 8  | 882 |
| ANKRD26P3  | chr13 | 19864733  | 19918965  | 0.802559195 | 0.746337174 | 0.056222021  | 4  | 883 |
| NA         | chr10 | 11210885  | 11213339  | 0.895820348 | 0.809664963 | 0.086155385  | 1  | 884 |
| FGF17      | chr8  | 21899909  | 21906320  | 0.839561462 | 0.76234902  | 0.077212441  | 11 | 885 |
| NA         | chr8  | 142363503 | 142365465 | 0.915520695 | 0.82768305  | 0.087837645  | 1  | 886 |
| NA         | chr6  | 74403626  | 74405854  | 0.835017074 | 0.763511937 | 0.071505137  | 7  | 887 |
| GDF7       | chr2  | 20866424  | 20873418  | 0.790069662 | 0.734751204 | 0.055318458  | 13 | 888 |
| TMIGD2     | chr19 | 4292229   | 4302428   | 0.826740354 | 0.754142431 | 0.072597923  | 2  | 889 |
| METTL13    | chr1  | 171750788 | 171783163 | 0.71361149  | 0.667630115 | 0.045981375  | 12 | 890 |
| NA         | chr16 | 89003187  | 89006059  | 0.900453993 | 0.815544464 | 0.084909529  | 8  | 891 |
| OGFRL1     | chr6  | 71998506  | 72018653  | 0.393453185 | 0.318262151 | 0.075191034  | 7  | 892 |
| AKNA       | chr9  | 117096436 | 117156685 | 0.887641513 | 0.812065054 | 0.075576459  | 4  | 893 |
| DPP4       | chr2  | 162848751 | 162931052 | 0.580927042 | 0.530750708 | 0.050176334  | 16 | 894 |
| DLX3       | chr17 | 48067369  | 48072588  | 0.819575729 | 0.733714357 | 0.085861372  | 12 | 895 |
| NA         | chr2  | 1624282   | 1629191   | 0.695924243 | 0.741676252 | -0.045752009 | 5  | 896 |
| CNFN       | chr19 | 42891171  | 42894439  | 0.516538467 | 0.47079465  | 0.045743817  | 7  | 897 |
| WIF1       | chr12 | 65444406  | 65515346  | 0.70070865  | 0.645733932 | 0.054974718  | 9  | 898 |
| ARL9       | chr4  | 57371509  | 57390614  | 0.841152906 | 0.762238769 | 0.078914137  | 10 | 899 |
| PTPRCAP    | chr11 | 67202981  | 67205538  | 0.87541856  | 0.793495778 | 0.081922781  | 10 | 900 |
| ADH7       | chr4  | 100333418 | 100356894 | 0.251075028 | 0.44978909  | -0.198714062 | 1  | 901 |
| WDR16      | chr17 | 9479944   | 9546776   | 0.567975641 | 0.522306271 | 0.04566937   | 6  | 902 |
| FGD2       | chr6  | 36973422  | 36996846  | 0.879797278 | 0.800192849 | 0.079604429  | 4  | 903 |
| VCX        | chrX  | 7810303   | 7812184   | 0.727342282 | 0.796522003 | -0.069179721 | 2  | 904 |
| NA         | chr4  | 178163693 | 178169927 | 0.825054512 | 0.746251243 | 0.078803269  | 1  | 905 |
| HIST1H4PS1 | chr6  | 27774853  | 27775117  | 0.906683445 | 0.821675798 | 0.085007647  | 3  | 906 |
| ZNF836     | chr19 | 52657117  | 52674896  | 0.510270412 | 0.460080964 | 0.050189448  | 5  | 907 |
| NA         | chr2  | 42104214  | 42121179  | 0.922070492 | 0.834233256 | 0.087837236  | 1  | 908 |
| C10orf10   | chr10 | 45466429  | 45474258  | 0.649572551 | 0.603023201 | 0.046549349  | 11 | 909 |
| FRAT1      | chr10 | 99079022  | 99081672  | 0.753064889 | 0.681094291 | 0.071970597  | 9  | 910 |
| SERPINE1   | chr7  | 100770370 | 100782547 | 0.836295866 | 0.7716698   | 0.064626067  | 10 | 911 |
| NA         | chr1  | 861264    | 866445    | 0.737498778 | 0.692136807 | 0.04536197   | 7  | 912 |
| MYF6       | chr12 | 81101277  | 81103253  | 0.81695138  | 0.738620854 | 0.078330526  | 7  | 913 |
| NA         | chr17 | 27966645  | 27967843  | 0.250782152 | 0.327689881 | -0.076907729 | 1  | 914 |
| ZNF844     | chr19 | 12175514  | 12192380  | 0.758688711 | 0.681391992 | 0.077296719  | 9  | 915 |
| NA         | chr5  | 55753622  | 55777773  | 0.555588764 | 0.510300341 | 0.045288424  | 12 | 916 |
| HIST1H2AM  | chr6  | 27860477  | 27860963  | 0.646291592 | 0.571091748 | 0.075199844  | 3  | 917 |
| ADAMTS15   | chr11 | 130318869 | 130346532 | 0.855477632 | 0.805574891 | 0.049902741  | 11 | 918 |
| NA         | chr22 | 46463236  | 46465771  | 0.089065216 | 0.172660077 | -0.083594861 | 4  | 919 |
| NA         | chr16 | 1209548   | 1210176   | 0.218822603 | 0.173597414 | 0.045225189  | 1  | 920 |
| FGF8       | chr10 | 103529899 | 103535854 | 0.76355063  | 0.701335228 | 0.062215403  | 13 | 921 |
| NA         | chrX  | 95592235  | 95592911  | 0.122424819 | 0.226945334 | -0.104520515 | 1  | 922 |
| CORO1A     | chr16 | 30194148  | 30200397  | 0.390733767 | 0.345072762 | 0.045661004  | 16 | 923 |
| EIF3FP3    | chr2  | 58478575  | 58479703  | 0.725807762 | 0.661216304 | 0.064591458  | 4  | 924 |
| NA         | chr2  | 105199610 | 105201812 | 0.545849889 | 0.603220594 | -0.057370706 | 1  | 925 |
| NA         | chr17 | 62073431  | 62077259  | 0.580114393 | 0.51824121  | 0.061873183  | 9  | 926 |
| NA         | chr19 | 23945746  | 24016116  | 0.357643727 | 0.274380651 | 0.083263077  | 4  | 927 |
| HIST1H2BB  | chr6  | 26043455  | 26043885  | 0.846809108 | 0.765327787 | 0.081481321  | 4  | 928 |
| NA         | chr18 | 56422091  | 56425074  | 0.911670867 | 0.825540204 | 0.086130664  | 1  | 929 |
| LRRC61     | chr7  | 150019728 | 150035239 | 0.718515425 | 0.666412437 | 0.052102988  | 31 | 930 |
| HOXD10     | chr2  | 176973518 | 176984670 | 0.784619147 | 0.707626482 | 0.076992665  | 39 | 931 |
| NA         | chr2  | 105760571 | 105761882 | 0.652167938 | 0.578855372 | 0.073312566  | 3  | 932 |
| MTATP6P1   | chr1  | 569076    | 569756    | 0.387813471 | 0.342841795 | 0.044971677  | 3  | 933 |

|                   |       |           |           |             |             |              |    |      |
|-------------------|-------|-----------|-----------|-------------|-------------|--------------|----|------|
| EVX1-AS           | chr7  | 27281048  | 27286848  | 0.891347194 | 0.799980627 | 0.091366566  | 35 | 934  |
| RNY4P10           | chr6  | 33167378  | 33167472  | 0.150811864 | 0.224341866 | -0.073530002 | 1  | 935  |
| ZCCHC16           | chrX  | 111697727 | 111700473 | 0.10096628  | 0.19649572  | -0.09552944  | 1  | 936  |
| NA                | chr5  | 97421964  | 97496897  | 0.156808431 | 0.27604755  | -0.119239118 | 1  | 937  |
| HSPB8             | chr12 | 119616447 | 119658936 | 0.677119165 | 0.632300798 | 0.044818367  | 14 | 938  |
| LGALS8-AS1        | chr1  | 236686369 | 236687808 | 0.719159942 | 0.660082734 | 0.059077208  | 12 | 939  |
| TNNI3             | chr19 | 55663137  | 55669141  | 0.714424927 | 0.653848614 | 0.060576313  | 9  | 940  |
| CD27              | chr12 | 6554033   | 6560884   | 0.880620054 | 0.798478785 | 0.082141269  | 7  | 941  |
| NA                | chr17 | 62745781  | 62778117  | 0.669086606 | 0.604635853 | 0.064450753  | 24 | 942  |
| TMEM249           | chr8  | 145575878 | 145578574 | 0.881305537 | 0.805289111 | 0.076016427  | 7  | 943  |
| NTHL1             | chr16 | 2089816   | 2097867   | 0.481679801 | 0.437065304 | 0.044614497  | 12 | 944  |
| ADRBK1            | chr11 | 67033881  | 67054027  | 0.786796973 | 0.734828058 | 0.051968914  | 21 | 945  |
| NA                | chr22 | 29909878  | 29931379  | 0.827454714 | 0.750008444 | 0.07744627   | 1  | 946  |
| TNFSF12-TNFSF13   | chr17 | 7452416   | 7464918   | 0.742044618 | 0.665544533 | 0.076500085  | 17 | 947  |
| NA                | chr7  | 99235865  | 99236390  | 0.629762197 | 0.570622387 | 0.05913981   | 1  | 948  |
| C11orf40          | chr11 | 4592653   | 4599050   | 0.905516694 | 0.813658267 | 0.091858427  | 1  | 949  |
| NA                | chr5  | 150537667 | 150538023 | 0.048847093 | 0.093367815 | -0.044520722 | 1  | 950  |
| RASSF1            | chr3  | 50367219  | 50378411  | 0.546199116 | 0.492810179 | 0.053388937  | 45 | 951  |
| UBA7              | chr3  | 49842640  | 49851379  | 0.837238154 | 0.759367876 | 0.077870277  | 4  | 952  |
| EREG              | chr4  | 75230860  | 75254468  | 0.134626048 | 0.09012678  | 0.044499269  | 3  | 953  |
| NA                | chr16 | 28986125  | 29002096  | 0.807743098 | 0.733458279 | 0.07428482   | 22 | 954  |
| OSBPL10-AS1       | chr3  | 31745550  | 31763144  | 0.716890785 | 0.588850606 | 0.128040179  | 1  | 955  |
| NA                | chr7  | 62517831  | 62520462  | 0.142648681 | 0.248785377 | -0.106136696 | 1  | 956  |
| NCF1C             | chr7  | 74572445  | 74587848  | 0.485533587 | 0.424154767 | 0.061378821  | 2  | 957  |
| NA                | chr7  | 127284739 | 127292066 | 0.40223704  | 0.350221023 | 0.052016017  | 6  | 958  |
| NA                | chr15 | 96904487  | 96904900  | 0.87797761  | 0.796123445 | 0.081854165  | 1  | 959  |
| NA                | chr14 | 61107448  | 61109307  | 0.930516352 | 0.844852886 | 0.085663466  | 4  | 960  |
| ZNF30             | chr19 | 35417807  | 35436074  | 0.344703065 | 0.300309145 | 0.044393921  | 4  | 961  |
| HOXB-AS5          | chr17 | 46800530  | 46802819  | 0.829724967 | 0.74451364  | 0.085211327  | 11 | 962  |
| CD244             | chr1  | 160799950 | 160832692 | 0.837981578 | 0.737613318 | 0.100368259  | 4  | 963  |
| MGAT1             | chr5  | 180217541 | 180242652 | 0.599967889 | 0.548493621 | 0.051474268  | 42 | 964  |
| SNAI3-AS1         | chr16 | 88729706  | 88753594  | 0.566804625 | 0.522465596 | 0.044339029  | 28 | 965  |
| ABHD14A           | chr3  | 52005442  | 52015212  | 0.605251331 | 0.548514988 | 0.056736343  | 21 | 966  |
| HIST1H2BM         | chr6  | 27782822  | 27783267  | 0.755508932 | 0.681534201 | 0.073974731  | 4  | 967  |
| GIPR              | chr19 | 46171502  | 46186982  | 0.650850345 | 0.600843822 | 0.050006523  | 27 | 968  |
| OR2M4             | chr1  | 248402231 | 248403166 | 0.381823208 | 0.573872447 | -0.192049239 | 1  | 969  |
| NA                | chr16 | 60520723  | 60557154  | 0.521545531 | 0.671684656 | -0.150139125 | 1  | 970  |
| SLC16A12          | chr10 | 91190051  | 91316398  | 0.723194254 | 0.669604143 | 0.053590111  | 26 | 971  |
| NA                | chr3  | 197171932 | 197185194 | 0.599498336 | 0.555277757 | 0.044220579  | 11 | 972  |
| NA                | chr16 | 77469907  | 77469999  | 0.922996561 | 0.837355432 | 0.08564113   | 1  | 973  |
| DEFB121           | chr20 | 29992648  | 30000641  | 0.391287136 | 0.455596533 | -0.064309397 | 6  | 974  |
| FREM3             | chr4  | 144498455 | 144621828 | 0.67807924  | 0.583471233 | 0.094608008  | 5  | 975  |
| C16orf54          | chr16 | 29753784  | 29757327  | 0.89971291  | 0.81193169  | 0.087781219  | 4  | 976  |
| NA                | chr16 | 87526161  | 87549241  | 0.602179744 | 0.538699493 | 0.063480251  | 4  | 977  |
| NA                | chr15 | 33595858  | 33602860  | 0.475439084 | 0.395165572 | 0.080273512  | 6  | 978  |
| NA                | chr10 | 101286838 | 101288018 | 0.779064885 | 0.696676217 | 0.082388667  | 7  | 979  |
| SLC39A4           | chr8  | 145635126 | 145642279 | 0.724227033 | 0.678375278 | 0.045851754  | 19 | 980  |
| MAOA              | chrX  | 43515467  | 43606068  | 0.425610491 | 0.524835275 | -0.099224784 | 4  | 981  |
| NA                | chr16 | 70413360  | 70433405  | 0.537866358 | 0.48747567  | 0.050390688  | 11 | 982  |
| NA                | chr17 | 30836972  | 30850442  | 0.705281921 | 0.645535708 | 0.059746213  | 6  | 983  |
| NA                | chr16 | 75142499  | 75144610  | 0.878366913 | 0.797251386 | 0.081115527  | 2  | 984  |
| GRXCR1            | chr4  | 42895284  | 43032675  | 0.297257341 | 0.409417121 | -0.11215978  | 2  | 985  |
| ZPBP2             | chr17 | 38024417  | 38034149  | 0.767446035 | 0.699290063 | 0.068155972  | 2  | 986  |
| C2orf70           | chr2  | 26785450  | 26802400  | 0.839667341 | 0.76680073  | 0.07286661   | 10 | 987  |
| H1FO              | chr22 | 38201114  | 38203442  | 0.53678477  | 0.468400067 | 0.068384703  | 8  | 988  |
| NA                | chr17 | 35297346  | 35300755  | 0.916742512 | 0.833855099 | 0.082887412  | 11 | 989  |
| SRP14-AS1         | chr15 | 40331512  | 40359491  | 0.462218224 | 0.418172571 | 0.044045653  | 14 | 990  |
| MIR4520A;MIR4520B | chr17 | 6558759   | 6558828   | 0.888805077 | 0.806836735 | 0.081968342  | 1  | 991  |
| CCDC71            | chr3  | 49199968  | 49203754  | 0.524496335 | 0.48048502  | 0.044011315  | 7  | 992  |
| DSG1              | chr18 | 28898052  | 28936992  | 0.78388874  | 0.720071079 | 0.063817661  | 3  | 993  |
| C17orf96          | chr17 | 36827961  | 36831187  | 0.720331319 | 0.649146615 | 0.071184704  | 9  | 994  |
| NA                | chr1  | 55683534  | 55699850  | 0.70584041  | 0.623599285 | 0.082241124  | 1  | 995  |
| NA                | chr6  | 43690523  | 43705571  | 0.874693474 | 0.794123508 | 0.080569967  | 1  | 996  |
| NA                | chr17 | 37913974  | 37920089  | 0.947942845 | 0.860703822 | 0.087239024  | 1  | 997  |
| DISP2             | chr15 | 40650436  | 40663257  | 0.780916388 | 0.734832827 | 0.046083561  | 10 | 998  |
| TRAF1             | chr9  | 123664671 | 123691451 | 0.834585456 | 0.778420888 | 0.056164568  | 8  | 999  |
| POU5F1P6          | chr3  | 128393578 | 128395848 | 0.659709684 | 0.740915049 | -0.081205365 | 1  | 1000 |

**Supplementary Table S6. List of the 1,000 top-ranked, differentially methylated CGIs after TET triple knockdown.**

This table is related to Fig. 2F.

| CGI                       | chromosome | start     | end       | beta.GFP_siRNA | beta.GFP_scramble | difference   | num.sites | rank |
|---------------------------|------------|-----------|-----------|----------------|-------------------|--------------|-----------|------|
| chr7:138666359-138666972  | chr7       | 138666359 | 138666972 | 0.489669095    | 0.265051096       | 0.224618     | 2         | 1    |
| chr1:149605515-149605903  | chr1       | 149605515 | 149605903 | 0.361994384    | 0.160476523       | 0.201517861  | 1         | 2    |
| chr4:3464800-3465440      | chr4       | 3464800   | 3465440   | 0.530252206    | 0.357766806       | 0.172485399  | 8         | 3    |
| chr9:103791945-103792173  | chr9       | 103791945 | 103792173 | 0.592916636    | 0.346410793       | 0.246505843  | 2         | 4    |
| chr3:46933747-46934293    | chr3       | 46933747  | 46934293  | 0.766497096    | 0.511601366       | 0.25489573   | 5         | 5    |
| chr9:34377402-34377610    | chr9       | 34377402  | 34377610  | 0.436128902    | 0.274696406       | 0.161432495  | 2         | 6    |
| chr17:54674874-54675232   | chr17      | 54674874  | 54675232  | 0.400776177    | 0.263999798       | 0.136776378  | 4         | 7    |
| chr14:26674164-26674478   | chr14      | 26674164  | 26674478  | 0.673964325    | 0.541186619       | 0.132777705  | 4         | 8    |
| chr12:47224913-47225664   | chr12      | 47224913  | 47225664  | 0.692618476    | 0.471692535       | 0.220925941  | 4         | 9    |
| chr3:46887629-46887919    | chr3       | 46887629  | 46887919  | 0.710075536    | 0.476483867       | 0.23359167   | 2         | 10   |
| chr12:108168987-108169570 | chr12      | 108168987 | 108169570 | 0.622011859    | 0.44593321        | 0.176078649  | 4         | 11   |
| chr4:155547985-155548322  | chr4       | 155547985 | 155548322 | 0.418931194    | 0.239848867       | 0.179082327  | 5         | 12   |
| chr1:15573621-15573953    | chr1       | 15573621  | 15573953  | 0.389119751    | 0.239083461       | 0.15003629   | 4         | 13   |
| chr8:117950473-117950717  | chr8       | 117950473 | 117950717 | 0.509981124    | 0.321085221       | 0.188895903  | 2         | 14   |
| chr16:66460504-66460850   | chr16      | 66460504  | 66460850  | 0.400427933    | 0.254246521       | 0.146181412  | 2         | 15   |
| chr12:131199825-131200157 | chr12      | 131199825 | 131200157 | 0.578978284    | 0.427105293       | 0.151872991  | 3         | 16   |
| chr11:1592499-1592810     | chr11      | 1592499   | 1592810   | 0.596487917    | 0.415102353       | 0.181385564  | 2         | 17   |
| chr19:42501262-42501486   | chr19      | 42501262  | 42501486  | 0.244210877    | 0.109212808       | 0.134998069  | 2         | 18   |
| chr13:28540357-28541279   | chr13      | 28540357  | 28541279  | 0.717871695    | 0.510745901       | 0.207125793  | 2         | 19   |
| chr19:45947711-45948047   | chr19      | 45947711  | 45948047  | 0.695483123    | 0.538320425       | 0.157162697  | 3         | 20   |
| chr6:19691911-19692305    | chr6       | 19691911  | 19692305  | 0.820811335    | 0.597481627       | 0.223329708  | 4         | 21   |
| chr18:47087880-47088528   | chr18      | 47087880  | 47088528  | 0.289102376    | 0.162691444       | 0.126410932  | 9         | 22   |
| chr2:75787130-75787420    | chr2       | 75787130  | 75787420  | 0.597771015    | 0.407713056       | 0.190057959  | 3         | 23   |
| chr5:50685454-50686148    | chr5       | 50685454  | 50686148  | 0.778374275    | 0.568692374       | 0.209681901  | 4         | 24   |
| chr10:72218131-72218484   | chr10      | 72218131  | 72218484  | 0.332018859    | 0.201900988       | 0.130117871  | 2         | 25   |
| chr12:54811982-54812202   | chr12      | 54811982  | 54812202  | 0.665139504    | 0.472591149       | 0.192548355  | 2         | 26   |
| chr9:72026904-72027428    | chr9       | 72026904  | 72027428  | 0.916460393    | 0.654077341       | 0.262383052  | 1         | 27   |
| chr19:1523706-1524565     | chr19      | 1523706   | 1524565   | 0.496793725    | 0.352935032       | 0.143858693  | 4         | 28   |
| chr3:72788073-72788416    | chr3       | 72788073  | 72788416  | 0.482021201    | 0.242749969       | 0.239271232  | 3         | 29   |
| chr2:220173871-220174283  | chr2       | 220173871 | 220174283 | 0.594928427    | 0.434395655       | 0.160532771  | 4         | 30   |
| chr7:128577819-128578756  | chr7       | 128577819 | 128578756 | 0.397240703    | 0.28041728        | 0.116823423  | 12        | 31   |
| chr5:134824932-134825224  | chr5       | 134824932 | 134825224 | 0.427599045    | 0.305573907       | 0.122025138  | 1         | 32   |
| chr9:46861917-46862270    | chr9       | 46861917  | 46862270  | 0.712962808    | 0.515882238       | 0.19708057   | 1         | 33   |
| chr3:158519510-158520329  | chr3       | 158519510 | 158520329 | 0.280878515    | 0.136227907       | 0.144650608  | 9         | 34   |
| chr7:32110064-32110910    | chr7       | 32110064  | 32110910  | 0.361857837    | 0.243268098       | 0.118589739  | 5         | 35   |
| chr17:33775295-33775794   | chr17      | 33775295  | 33775794  | 0.571281868    | 0.444332884       | 0.126948983  | 5         | 36   |
| chr14:76597649-76597911   | chr14      | 76597649  | 76597911  | 0.621806102    | 0.465522943       | 0.156283158  | 2         | 37   |
| chr9:44419920-44420345    | chr9       | 44419920  | 44420345  | 0.657299331    | 0.481366016       | 0.175933315  | 1         | 38   |
| chr17:34091137-34091919   | chr17      | 34091137  | 34091919  | 0.330429591    | 0.217511091       | 0.1129185    | 3         | 39   |
| chr11:47615711-47616055   | chr11      | 47615711  | 47616055  | 0.426409157    | 0.169088109       | 0.257321048  | 1         | 40   |
| chr11:64781451-64782385   | chr11      | 64781451  | 64782385  | 0.225415587    | 0.113467779       | 0.111947808  | 4         | 41   |
| chr11:18067717-18067928   | chr11      | 18067717  | 18067928  | 0.797203056    | 0.615710838       | 0.181492218  | 2         | 42   |
| chr5:41869664-41870876    | chr5       | 41869664  | 41870876  | 0.401641729    | 0.249222756       | 0.152418972  | 10        | 43   |
| chr20:34652455-34653500   | chr20      | 34652455  | 34653500  | 0.465441932    | 0.350387702       | 0.11505423   | 4         | 44   |
| chr2:170220773-170221114  | chr2       | 170220773 | 170221114 | 0.306156333    | 0.187032545       | 0.119123788  | 4         | 45   |
| chr1:243264941-243265196  | chr1       | 243264941 | 243265196 | 0.530066324    | 0.394819713       | 0.135246611  | 1         | 46   |
| chr8:91013142-91014266    | chr8       | 91013142  | 91014266  | 0.833483767    | 0.62893995        | 0.204543817  | 10        | 47   |
| chr20:56323974-56324254   | chr20      | 56323974  | 56324254  | 0.499555128    | 0.355562791       | 0.143992337  | 3         | 48   |
| chr14:36977519-36977996   | chr14      | 36977519  | 36977996  | 0.505561781    | 0.373965057       | 0.131596724  | 4         | 49   |
| chr12:49485767-49485977   | chr12      | 49485767  | 49485977  | 0.560793552    | 0.451501029       | 0.109292524  | 3         | 50   |
| chr13:92051154-92051716   | chr13      | 92051154  | 92051716  | 0.476273763    | 0.354907247       | 0.121366516  | 4         | 51   |
| chr6:58180155-58180443    | chr6       | 58180155  | 58180443  | 0.681169373    | 0.513933503       | 0.167235871  | 1         | 52   |
| chr12:56325775-56326223   | chr12      | 56325775  | 56326223  | 0.418962423    | 0.288705036       | 0.130257387  | 6         | 53   |
| chr2:79220193-79220592    | chr2       | 79220193  | 79220592  | 0.550802352    | 0.418936717       | 0.131865635  | 4         | 54   |
| chr5:74907287-74907770    | chr5       | 74907287  | 74907770  | 0.840941225    | 0.656041974       | 0.184899251  | 3         | 55   |
| chr19:2540907-2541138     | chr19      | 2540907   | 2541138   | 0.5780065      | 0.75146714        | -0.173460639 | 3         | 56   |
| chr9:88137610-88137985    | chr9       | 88137610  | 88137985  | 0.737524932    | 0.56708562        | 0.170439313  | 2         | 57   |
| chr1:91182510-91182857    | chr1       | 91182510  | 91182857  | 0.506551433    | 0.399163332       | 0.107388101  | 5         | 58   |
| chr9:77112713-77113583    | chr9       | 77112713  | 77113583  | 0.41301017     | 0.276933826       | 0.136076345  | 2         | 59   |
| chr8:144653775-144653976  | chr8       | 144653775 | 144653976 | 0.229902421    | 0.123366068       | 0.106536353  | 4         | 60   |
| chr3:133747921-133748266  | chr3       | 133747921 | 133748266 | 0.750369212    | 0.571494494       | 0.178874718  | 2         | 61   |
| chr11:30038523-30038823   | chr11      | 30038523  | 30038823  | 0.453007891    | 0.28065993        | 0.172347961  | 9         | 62   |
| chr11:68611251-68611807   | chr11      | 68611251  | 68611807  | 0.760582441    | 0.600699271       | 0.15988317   | 5         | 63   |
| chr1:209979317-209979666  | chr1       | 209979317 | 209979666 | 0.518263729    | 0.333455662       | 0.184808067  | 8         | 64   |
| chr6:84562821-84563758    | chr6       | 84562821  | 84563758  | 0.40420047     | 0.292196265       | 0.112004205  | 10        | 65   |
| chr17:46690391-46691055   | chr17      | 46690391  | 46691055  | 0.546559564    | 0.421851856       | 0.124707708  | 2         | 66   |
| chr6:50692150-50692375    | chr6       | 50692150  | 50692375  | 0.441849267    | 0.274005194       | 0.167844073  | 3         | 67   |
| chr15:60690709-60690930   | chr15      | 60690709  | 60690930  | 0.664864397    | 0.517122611       | 0.147741785  | 2         | 68   |
| chr5:50694985-50695352    | chr5       | 50694985  | 50695352  | 0.750439709    | 0.582932993       | 0.167506716  | 3         | 69   |
| chr9:29826527-29826736    | chr9       | 29826527  | 29826736  | 0.590302493    | 0.721791151       | -0.131488658 | 2         | 70   |
| chr5:115912002-115912384  | chr5       | 115912002 | 115912384 | 0.680177506    | 0.562107212       | 0.118070294  | 4         | 71   |
| chr2:31360322-31361821    | chr2       | 31360322  | 31361821  | 0.415570428    | 0.311671655       | 0.103898773  | 12        | 72   |
| chr17:16487651-16487884   | chr17      | 16487651  | 16487884  | 0.77222646     | 0.611450432       | 0.160776029  | 3         | 73   |

|                           |       |           |           |             |             |              |    |     |
|---------------------------|-------|-----------|-----------|-------------|-------------|--------------|----|-----|
| chr9:35111268-35111504    | chr9  | 35111268  | 35111504  | 0.264165589 | 0.146842162 | 0.117323427  | 1  | 74  |
| chr10:104629039-104629479 | chr10 | 104629039 | 104629479 | 0.458523508 | 0.297522996 | 0.161000512  | 7  | 75  |
| chr16:30042308-30042612   | chr16 | 30042308  | 30042612  | 0.720306738 | 0.567982868 | 0.15232387   | 3  | 76  |
| chrX:3630407-3630620      | chrX  | 3630407   | 3630620   | 0.755988997 | 0.571469357 | 0.18451964   | 4  | 77  |
| chr16:67188614-67189652   | chr16 | 67188614  | 67189652  | 0.702827956 | 0.600111036 | 0.10271692   | 3  | 78  |
| chr8:49293202-49293547    | chr8  | 49293202  | 49293547  | 0.605436362 | 0.483534486 | 0.121901876  | 3  | 79  |
| chr6:29521111-29521833    | chr6  | 29521111  | 29521833  | 0.625419509 | 0.491876913 | 0.133542596  | 32 | 80  |
| chr9:115708029-115708238  | chr9  | 115708029 | 115708238 | 0.678785934 | 0.533593633 | 0.1451923    | 1  | 81  |
| chr1:39044060-39044561    | chr1  | 39044060  | 39044561  | 0.294757431 | 0.163667907 | 0.131089524  | 5  | 82  |
| chr1:217311468-217311773  | chr1  | 217311468 | 217311773 | 0.712178438 | 0.564405623 | 0.147772814  | 4  | 83  |
| chr20:44440947-44441655   | chr20 | 44440947  | 44441655  | 0.535132739 | 0.426932684 | 0.108200054  | 16 | 84  |
| chr1:209848444-209849428  | chr1  | 209848444 | 209849428 | 0.498941568 | 0.354511499 | 0.144430069  | 8  | 85  |
| chr12:113592204-113592620 | chr12 | 113592204 | 113592620 | 0.866212447 | 0.687594219 | 0.178618228  | 4  | 86  |
| chr7:948295-949168        | chr7  | 948295    | 949168    | 0.447678732 | 0.321163469 | 0.126515264  | 2  | 87  |
| chr11:8009048-8009251     | chr11 | 8009048   | 8009251   | 0.372745771 | 0.271435333 | 0.101310438  | 2  | 88  |
| chr8:10586614-10586886    | chr8  | 10586614  | 10586886  | 0.815336007 | 0.648103403 | 0.167232604  | 4  | 89  |
| chr20:57797224-57797441   | chr20 | 57797224  | 57797441  | 0.511784085 | 0.410488077 | 0.101296009  | 2  | 90  |
| chr8:33456916-33457515    | chr8  | 33456916  | 33457515  | 0.559122479 | 0.440413866 | 0.118708613  | 6  | 91  |
| chr9:32572997-32573227    | chr9  | 32572997  | 32573227  | 0.208203095 | 0.082953234 | 0.125249861  | 1  | 92  |
| chr16:34407637-34407919   | chr16 | 34407637  | 34407919  | 0.563682063 | 0.67108939  | -0.107407326 | 4  | 93  |
| chr4:991239-991625        | chr4  | 991239    | 991625    | 0.74757208  | 0.600427626 | 0.147144454  | 2  | 94  |
| chr19:23257958-23258518   | chr19 | 23257958  | 23258518  | 0.391885958 | 0.276817162 | 0.115068796  | 3  | 95  |
| chr16:74734153-74734572   | chr16 | 74734153  | 74734572  | 0.643962714 | 0.51662921  | 0.127333505  | 4  | 96  |
| chr3:22413493-22414365    | chr3  | 22413493  | 22414365  | 0.491406272 | 0.377251436 | 0.114154837  | 6  | 97  |
| chr5:33892192-33892403    | chr5  | 33892192  | 33892403  | 0.616054546 | 0.491010439 | 0.125044107  | 1  | 98  |
| chr9:33044246-33044612    | chr9  | 33044246  | 33044612  | 0.67624309  | 0.539364841 | 0.136878248  | 1  | 99  |
| chr18:61603401-61604244   | chr18 | 61603401  | 61604244  | 0.410038574 | 0.29214163  | 0.117896944  | 5  | 100 |
| chr10:133849677-133850826 | chr10 | 133849677 | 133850826 | 0.595048922 | 0.493504506 | 0.101544417  | 7  | 101 |
| chr1:21948675-21949263    | chr1  | 21948675  | 21949263  | 0.535700428 | 0.43190539  | 0.103795038  | 3  | 102 |
| chr10:130339527-130339777 | chr10 | 130339527 | 130339777 | 0.791894202 | 0.64068077  | 0.151213432  | 5  | 103 |
| chr9:129677707-129678009  | chr9  | 129677707 | 129678009 | 0.255044604 | 0.151094746 | 0.103949858  | 2  | 104 |
| chr17:38935800-38936093   | chr17 | 38935800  | 38936093  | 0.669273019 | 0.556766742 | 0.112506277  | 4  | 105 |
| chr19:9903582-9903990     | chr19 | 9903582   | 9903990   | 0.759669543 | 0.612808028 | 0.146861515  | 3  | 106 |
| chr16:31453944-31454561   | chr16 | 31453944  | 31454561  | 0.356568308 | 0.258135393 | 0.098432915  | 3  | 107 |
| chr4:570951-571768        | chr4  | 570951    | 571768    | 0.705690355 | 0.567089174 | 0.138601181  | 7  | 108 |
| chr4:10462833-10463689    | chr4  | 10462833  | 10463689  | 0.722237393 | 0.573611067 | 0.148626326  | 6  | 109 |
| chr1:11724114-11724885    | chr1  | 11724114  | 11724885  | 0.568480374 | 0.462571519 | 0.105908855  | 7  | 110 |
| chr7:123172733-123173231  | chr7  | 123172733 | 123173231 | 0.231416491 | 0.133844979 | 0.097571511  | 1  | 111 |
| chr16:75033042-75034207   | chr16 | 75033042  | 75034207  | 0.313722565 | 0.216235514 | 0.09748705   | 5  | 112 |
| chr6:33181011-33181256    | chr6  | 33181011  | 33181256  | 0.594446013 | 0.478536327 | 0.115909687  | 7  | 113 |
| chr1:91172103-91172771    | chr1  | 91172103  | 91172771  | 0.595957755 | 0.478856486 | 0.117101269  | 5  | 114 |
| chr16:3493099-3493569     | chr16 | 3493099   | 3493569   | 0.596386274 | 0.477308666 | 0.119077608  | 6  | 115 |
| chr6:26689804-26690092    | chr6  | 26689804  | 26690092  | 0.699054913 | 0.563660255 | 0.135394658  | 2  | 116 |
| chr1:98510967-98511710    | chr1  | 98510967  | 98511710  | 0.287977907 | 0.18388667  | 0.104091238  | 6  | 117 |
| chrX:9863528-9863822      | chrX  | 9863528   | 9863822   | 0.786832652 | 0.895718137 | -0.108885485 | 4  | 118 |
| chr19:18220765-18221445   | chr19 | 18220765  | 18221445  | 0.41346649  | 0.304727865 | 0.108738625  | 3  | 119 |
| chr1:10057122-10058108    | chr1  | 10057122  | 10058108  | 0.602307166 | 0.49394722  | 0.108359946  | 8  | 120 |
| chr1:20692583-20693534    | chr1  | 20692583  | 20693534  | 0.647503555 | 0.517964114 | 0.129539441  | 5  | 121 |
| chr16:68678687-68680149   | chr16 | 68678687  | 68680149  | 0.739232515 | 0.600230374 | 0.139002141  | 5  | 122 |
| chr10:94831513-94832312   | chr10 | 94831513  | 94832312  | 0.739326087 | 0.5994298   | 0.139896287  | 3  | 123 |
| chr6:170190112-170190712  | chr6  | 170190112 | 170190712 | 0.327439316 | 0.209118703 | 0.118320613  | 6  | 124 |
| chr9:130980901-130981317  | chr9  | 130980901 | 130981317 | 0.608560306 | 0.48808132  | 0.120478986  | 2  | 125 |
| chr7:1084388-1084595      | chr7  | 1084388   | 1084595   | 0.294098849 | 0.172702686 | 0.121396163  | 2  | 126 |
| chr14:100259161-100259542 | chr14 | 100259161 | 100259542 | 0.88963529  | 0.724201779 | 0.165433512  | 4  | 127 |
| chr16:88449290-88450382   | chr16 | 88449290  | 88450382  | 0.59311526  | 0.482626526 | 0.110488734  | 5  | 128 |
| chr2:5813483-5813710      | chr2  | 5813483   | 5813710   | 0.634094976 | 0.513003776 | 0.121091201  | 2  | 129 |
| chr9:138606404-138606934  | chr9  | 138606404 | 138606934 | 0.535490573 | 0.402762551 | 0.132728022  | 2  | 130 |
| chr13:21900426-21900637   | chr13 | 21900426  | 21900637  | 0.85937044  | 0.700211919 | 0.159158521  | 3  | 131 |
| chr12:113914441-113914657 | chr12 | 113914441 | 113914657 | 0.812385904 | 0.631939178 | 0.180446726  | 3  | 132 |
| chr17:46673533-46674181   | chr17 | 46673533  | 46674181  | 0.615240833 | 0.498395439 | 0.116845394  | 3  | 133 |
| chr7:121943868-121944538  | chr7  | 121943868 | 121944538 | 0.357081876 | 0.25918423  | 0.097897645  | 5  | 134 |
| chr19:59010485-59011011   | chr19 | 59010485  | 59011011  | 0.541704055 | 0.440876437 | 0.100827618  | 4  | 135 |
| chr7:5526390-5526693      | chr7  | 5526390   | 5526693   | 0.770608369 | 0.624668705 | 0.145939664  | 1  | 136 |
| chr5:43000344-43000791    | chr5  | 43000344  | 43000791  | 0.820775416 | 0.667799179 | 0.152976237  | 4  | 137 |
| chr8:97657175-97657943    | chr8  | 97657175  | 97657943  | 0.352082693 | 0.213228514 | 0.138854179  | 12 | 138 |
| chr8:50822271-50822860    | chr8  | 50822271  | 50822860  | 0.870178682 | 0.708070855 | 0.162107827  | 4  | 139 |
| chr15:41952536-41953222   | chr15 | 41952536  | 41953222  | 0.563272821 | 0.458468521 | 0.1048043    | 3  | 140 |
| chr19:53360202-53360460   | chr19 | 53360202  | 53360460  | 0.520075242 | 0.421327604 | 0.098747638  | 1  | 141 |
| chr11:63438302-63439314   | chr11 | 63438302  | 63439314  | 0.724720946 | 0.589658898 | 0.135062048  | 13 | 142 |
| chr14:25518425-25519612   | chr14 | 25518425  | 25519612  | 0.435493018 | 0.332694574 | 0.102798444  | 3  | 143 |
| chr5:157098264-157099041  | chr5  | 157098264 | 157099041 | 0.463018565 | 0.322368132 | 0.140650433  | 8  | 144 |
| chr19:58545116-58545897   | chr19 | 58545116  | 58545897  | 0.808435379 | 0.680400552 | 0.128034827  | 10 | 145 |
| chr1:54965024-54965391    | chr1  | 54965024  | 54965391  | 0.365940134 | 0.271343909 | 0.094596225  | 3  | 146 |
| chr19:16528759-16529029   | chr19 | 16528759  | 16529029  | 0.71841881  | 0.61926961  | 0.0991492    | 3  | 147 |
| chr5:75377899-75378189    | chr5  | 75377899  | 75378189  | 0.603093855 | 0.498943581 | 0.104150274  | 4  | 148 |
| chr6:26197071-26197537    | chr6  | 26197071  | 26197537  | 0.525680597 | 0.422325927 | 0.103354669  | 4  | 149 |

|                           |       |           |           |             |             |              |    |     |
|---------------------------|-------|-----------|-----------|-------------|-------------|--------------|----|-----|
| chr17:33814235-33814947   | chr17 | 33814235  | 33814947  | 0.767358499 | 0.616700369 | 0.150658131  | 6  | 150 |
| chr2:176950596-176950846  | chr2  | 176950596 | 176950846 | 0.720838088 | 0.59743971  | 0.123398378  | 3  | 151 |
| chr16:81437205-81437542   | chr16 | 81437205  | 81437542  | 0.107874852 | 0.226857671 | -0.118982819 | 2  | 152 |
| chr5:50265086-50265737    | chr5  | 50265086  | 50265737  | 0.759965475 | 0.618424929 | 0.141540546  | 4  | 153 |
| chr13:31019861-31020137   | chr13 | 31019861  | 31020137  | 0.42661866  | 0.319447776 | 0.107170884  | 2  | 154 |
| chr7:41745179-41745462    | chr7  | 41745179  | 41745462  | 0.658434618 | 0.537794362 | 0.120640256  | 3  | 155 |
| chr16:1463763-1464716     | chr16 | 1463763   | 1464716   | 0.389296499 | 0.289329284 | 0.099967214  | 3  | 156 |
| chr2:26396103-26397204    | chr2  | 26396103  | 26397204  | 0.631144573 | 0.532084978 | 0.099059595  | 4  | 157 |
| chr16:49309124-49309353   | chr16 | 49309124  | 49309353  | 0.82186964  | 0.674286275 | 0.147583365  | 2  | 158 |
| chr19:54024646-54024923   | chr19 | 54024646  | 54024923  | 0.494821696 | 0.401369479 | 0.093452217  | 4  | 159 |
| chr2:228582486-228582821  | chr2  | 228582486 | 228582821 | 0.671148433 | 0.557058388 | 0.114090045  | 8  | 160 |
| chr21:42218490-42219222   | chr21 | 42218490  | 42219222  | 0.603897287 | 0.496812783 | 0.107084503  | 8  | 161 |
| chr15:45480702-45480922   | chr15 | 45480702  | 45480922  | 0.623432965 | 0.517804165 | 0.1056288    | 2  | 162 |
| chr4:155254131-155254603  | chr4  | 155254131 | 155254603 | 0.896700984 | 0.740879097 | 0.155821887  | 4  | 163 |
| chr20:34204988-34205269   | chr20 | 34204988  | 34205269  | 0.608412736 | 0.50469054  | 0.103722196  | 4  | 164 |
| chr5:139076543-139077179  | chr5  | 139076543 | 139077179 | 0.324271483 | 0.20930927  | 0.114962213  | 5  | 165 |
| chr9:129088647-129088994  | chr9  | 129088647 | 129088994 | 0.740173982 | 0.606853911 | 0.133320071  | 1  | 166 |
| chr19:1795923-1797001     | chr19 | 1795923   | 1797001   | 0.715819516 | 0.622809563 | 0.093009952  | 4  | 167 |
| chr14:103557607-103558235 | chr14 | 103557607 | 103558235 | 0.446431761 | 0.353618747 | 0.092813014  | 4  | 168 |
| chr1:87797369-87797884    | chr1  | 87797369  | 87797884  | 0.394097579 | 0.301304483 | 0.092793096  | 4  | 169 |
| chr18:43355319-43355698   | chr18 | 43355319  | 43355698  | 0.67559331  | 0.553595178 | 0.121998132  | 3  | 170 |
| chr19:3671903-3672121     | chr19 | 3671903   | 3672121   | 0.675925895 | 0.554009791 | 0.121916104  | 2  | 171 |
| chr12:54387826-54388732   | chr12 | 54387826  | 54388732  | 0.697779773 | 0.571604935 | 0.126174838  | 5  | 172 |
| chr12:54408427-54408713   | chr12 | 54408427  | 54408713  | 0.866775081 | 0.713599725 | 0.153175356  | 2  | 173 |
| chr5:50683286-50683615    | chr5  | 50683286  | 50683615  | 0.779110346 | 0.639402842 | 0.139707504  | 4  | 174 |
| chr8:142528186-142529029  | chr8  | 142528186 | 142529029 | 0.638528481 | 0.517394148 | 0.121134333  | 3  | 175 |
| chr18:77724353-77724836   | chr18 | 77724353  | 77724836  | 0.414913268 | 0.3184867   | 0.096426568  | 5  | 176 |
| chrX:102884437-102884677  | chrX  | 102884437 | 102884677 | 0.648342267 | 0.527310356 | 0.121031912  | 2  | 177 |
| chr2:200524002-200524204  | chr2  | 200524002 | 200524204 | 0.578571329 | 0.482530214 | 0.096041115  | 3  | 178 |
| chr7:155325812-155326357  | chr7  | 155325812 | 155326357 | 0.695700311 | 0.57522122  | 0.120479091  | 4  | 179 |
| chr7:102920310-102921514  | chr7  | 102920310 | 102921514 | 0.5546664   | 0.457804239 | 0.096862161  | 13 | 180 |
| chr17:1808573-1808773     | chr17 | 1808573   | 1808773   | 0.830428585 | 0.68904125  | 0.141387335  | 3  | 181 |
| chr6:43276420-43276659    | chr6  | 43276420  | 43276659  | 0.574102563 | 0.472206634 | 0.101895929  | 6  | 182 |
| chr2:230135709-230136004  | chr2  | 230135709 | 230136004 | 0.305769338 | 0.205181721 | 0.100587617  | 4  | 183 |
| chr3:50275394-50275645    | chr3  | 50275394  | 50275645  | 0.659729352 | 0.546299887 | 0.113429465  | 4  | 184 |
| chr5:80689819-80690228    | chr5  | 80689819  | 80690228  | 0.893815866 | 0.739881003 | 0.153934863  | 3  | 185 |
| chr10:100227439-100227832 | chr10 | 100227439 | 100227832 | 0.691509679 | 0.577138324 | 0.114371355  | 3  | 186 |
| chr19:53496733-53497028   | chr19 | 53496733  | 53497028  | 0.450618487 | 0.358048566 | 0.092569922  | 5  | 187 |
| chr22:19701515-19701891   | chr22 | 19701515  | 19701891  | 0.802531276 | 0.673868973 | 0.128662303  | 5  | 188 |
| chr10:94459255-94459591   | chr10 | 94459255  | 94459591  | 0.30132538  | 0.186535068 | 0.114790312  | 4  | 189 |
| chr17:30263762-30264515   | chr17 | 30263762  | 30264515  | 0.159969879 | 0.064280853 | 0.095689027  | 6  | 190 |
| chr3:40518518-40518848    | chr3  | 40518518  | 40518848  | 0.266859094 | 0.119338042 | 0.147521052  | 5  | 191 |
| chr4:16084196-16085735    | chr4  | 16084196  | 16085735  | 0.682786106 | 0.580925575 | 0.101860531  | 11 | 192 |
| chr11:123065427-123066184 | chr11 | 123065427 | 123066184 | 0.743900502 | 0.620883381 | 0.123017121  | 4  | 193 |
| chr8:65492936-65494452    | chr8  | 65492936  | 65494452  | 0.25135984  | 0.12539966  | 0.12596018   | 4  | 194 |
| chr22:43165948-43166287   | chr22 | 43165948  | 43166287  | 0.672628067 | 0.523643649 | 0.148984417  | 2  | 195 |
| chr19:53696030-53696650   | chr19 | 53696030  | 53696650  | 0.831151852 | 0.696882685 | 0.134269167  | 6  | 196 |
| chr1:18436552-18437673    | chr1  | 18436552  | 18437673  | 0.409019999 | 0.312861332 | 0.096158668  | 5  | 197 |
| chr16:29477390-29478502   | chr16 | 29477390  | 29478502  | 0.72647444  | 0.602242695 | 0.124231745  | 1  | 198 |
| chr6:85482570-85484718    | chr6  | 85482570  | 85484718  | 0.599866466 | 0.507395214 | 0.092471252  | 13 | 199 |
| chr17:7197432-7198417     | chr17 | 7197432   | 7198417   | 0.7565119   | 0.648461782 | 0.108050117  | 12 | 200 |
| chr8:145637966-145639182  | chr8  | 145637966 | 145639182 | 0.72266754  | 0.632324581 | 0.090342959  | 6  | 201 |
| chr16:31548738-31549184   | chr16 | 31548738  | 31549184  | 0.851440454 | 0.714257507 | 0.137182947  | 3  | 202 |
| chr7:27227521-27229043    | chr7  | 27227521  | 27229043  | 0.677965603 | 0.564281499 | 0.113684103  | 4  | 203 |
| chr20:58152281-58152847   | chr20 | 58152281  | 58152847  | 0.83297969  | 0.698186991 | 0.134792698  | 3  | 204 |
| chr3:46607347-46607806    | chr3  | 46607347  | 46607806  | 0.810864787 | 0.681186651 | 0.129678136  | 3  | 205 |
| chr1:161008378-161008830  | chr1  | 161008378 | 161008830 | 0.742973605 | 0.618707359 | 0.124266247  | 8  | 206 |
| chr18:73627918-73628658   | chr18 | 73627918  | 73628658  | 0.758353059 | 0.619777202 | 0.138575857  | 3  | 207 |
| chr15:72476677-72476969   | chr15 | 72476677  | 72476969  | 0.757897957 | 0.641050897 | 0.116847061  | 4  | 208 |
| chr12:54071054-54071265   | chr12 | 54071054  | 54071265  | 0.482087843 | 0.39240749  | 0.089680352  | 5  | 209 |
| chr22:19156978-19157413   | chr22 | 19156978  | 19157413  | 0.759057175 | 0.62493411  | 0.134123064  | 3  | 210 |
| chr10:112431836-112432426 | chr10 | 112431836 | 112432426 | 0.361349464 | 0.180618597 | 0.180730867  | 7  | 211 |
| chr14:38678246-38680937   | chr14 | 38678246  | 38680937  | 0.600438833 | 0.489484713 | 0.11095412   | 10 | 212 |
| chr22:43505952-43506167   | chr22 | 43505952  | 43506167  | 0.795747866 | 0.673332702 | 0.122415164  | 3  | 213 |
| chr22:21311337-21312201   | chr22 | 21311337  | 21312201  | 0.789945792 | 0.662834291 | 0.127111501  | 4  | 214 |
| chr18:13801000-13801223   | chr18 | 13801000  | 13801223  | 0.20607336  | 0.116829764 | 0.089243596  | 3  | 215 |
| chr17:37764093-37764304   | chr17 | 37764093  | 37764304  | 0.589902036 | 0.496553091 | 0.093348946  | 7  | 216 |
| chr9:135039674-135039978  | chr9  | 135039674 | 135039978 | 0.856813032 | 0.714853453 | 0.141959579  | 2  | 217 |
| chr6:26199198-26199466    | chr6  | 26199198  | 26199466  | 0.632398494 | 0.526381703 | 0.106016791  | 2  | 218 |
| chr6:13873766-13874262    | chr6  | 13873766  | 13874262  | 0.577867869 | 0.486168552 | 0.091699317  | 4  | 219 |
| chr5:54528096-54528404    | chr5  | 54528096  | 54528404  | 0.73023903  | 0.620202114 | 0.110036916  | 4  | 220 |
| chr10:26504384-26507434   | chr10 | 26504384  | 26507434  | 0.641064887 | 0.549487525 | 0.091577362  | 18 | 221 |
| chr12:133195923-133196556 | chr12 | 133195923 | 133196556 | 0.734979371 | 0.627156013 | 0.107823359  | 3  | 222 |
| chr9:122131087-122132214  | chr9  | 122131087 | 122132214 | 0.730249007 | 0.617173783 | 0.113075223  | 6  | 223 |
| chr2:105760110-105761018  | chr2  | 105760110 | 105761018 | 0.470517848 | 0.367071299 | 0.103446549  | 4  | 224 |
| chr12:115130009-115130242 | chr12 | 115130009 | 115130242 | 0.815762358 | 0.683311299 | 0.132451059  | 1  | 225 |



|                           |       |           |           |             |             |              |    |     |
|---------------------------|-------|-----------|-----------|-------------|-------------|--------------|----|-----|
| chr6:33396051-33396296    | chr6  | 33396051  | 33396296  | 0.713263052 | 0.600226913 | 0.113036139  | 9  | 226 |
| chr20:30135077-30135292   | chr20 | 30135077  | 30135292  | 0.723711675 | 0.607303077 | 0.116408598  | 7  | 227 |
| chr10:13933483-13934184   | chr10 | 13933483  | 13934184  | 0.502073707 | 0.414891198 | 0.087182509  | 3  | 228 |
| chr3:121902743-121903645  | chr3  | 121902743 | 121903645 | 0.868594675 | 0.730333504 | 0.138261171  | 4  | 229 |
| chr17:7108305-7108654     | chr17 | 7108305   | 7108654   | 0.564830416 | 0.472010028 | 0.092820388  | 3  | 230 |
| chr5:141293785-141294049  | chr5  | 141293785 | 141294049 | 0.711986104 | 0.597917218 | 0.114068886  | 4  | 231 |
| chrX:13587649-13588221    | chrX  | 13587649  | 13588221  | 0.850111391 | 0.718591851 | 0.131519539  | 4  | 232 |
| chr9:94903573-94903827    | chr9  | 94903573  | 94903827  | 0.812218186 | 0.682836241 | 0.129381945  | 1  | 233 |
| chr20:1783825-1784552     | chr20 | 1783825   | 1784552   | 0.677506835 | 0.568781457 | 0.108725379  | 4  | 234 |
| chr3:184321784-184322277  | chr3  | 184321784 | 184322277 | 0.831934237 | 0.700421926 | 0.131512312  | 3  | 235 |
| chr10:91294948-91295925   | chr10 | 91294948  | 91295925  | 0.602080103 | 0.515305487 | 0.086774616  | 12 | 236 |
| chr2:26785115-26785687    | chr2  | 26785115  | 26785687  | 0.772731363 | 0.649884828 | 0.122846535  | 10 | 237 |
| chr1:109656096-109656611  | chr1  | 109656096 | 109656611 | 0.598168611 | 0.502215712 | 0.095952899  | 5  | 238 |
| chr11:32008803-32009044   | chr11 | 32008803  | 32009044  | 0.778347067 | 0.657838352 | 0.120508715  | 3  | 239 |
| chr9:123690772-123691675  | chr9  | 123690772 | 123691675 | 0.646856748 | 0.559576445 | 0.087280303  | 3  | 240 |
| chr18:2905951-2907348     | chr18 | 2905951   | 2907348   | 0.808466657 | 0.690691766 | 0.11777489   | 6  | 241 |
| chr1:16543684-16544307    | chr1  | 16543684  | 16544307  | 0.460368833 | 0.374036708 | 0.086332125  | 5  | 242 |
| chr16:2907575-2907836     | chr16 | 2907575   | 2907836   | 0.808822534 | 0.686379331 | 0.122443203  | 2  | 243 |
| chr8:72917306-72917641    | chr8  | 72917306  | 72917641  | 0.859179683 | 0.723777031 | 0.135402652  | 3  | 244 |
| chr9:138156711-138156983  | chr9  | 138156711 | 138156983 | 0.701888519 | 0.856081342 | -0.154192823 | 1  | 245 |
| chr9:141044509-141045113  | chr9  | 141044509 | 141045113 | 0.570007868 | 0.483770586 | 0.086237282  | 2  | 246 |
| chr10:135170646-135171954 | chr10 | 135170646 | 135171954 | 0.68795095  | 0.601823736 | 0.086127214  | 11 | 247 |
| chr22:50468455-50469353   | chr22 | 50468455  | 50469353  | 0.284404513 | 0.198418065 | 0.085986448  | 3  | 248 |
| chr12:57635241-57635572   | chr12 | 57635241  | 57635572  | 0.893732127 | 0.755384687 | 0.138347439  | 2  | 249 |
| chr19:36164078-36164286   | chr19 | 36164078  | 36164286  | 0.901972441 | 0.760498322 | 0.14147412   | 1  | 250 |
| chr10:23487758-23488543   | chr10 | 23487758  | 23488543  | 0.566174402 | 0.480364143 | 0.085810258  | 4  | 251 |
| chr16:1120154-1120441     | chr16 | 1120154   | 1120441   | 0.179889619 | 0.265628765 | -0.085739146 | 1  | 252 |
| chr6:105388191-105389545  | chr6  | 105388191 | 105389545 | 0.785625872 | 0.689926802 | 0.095699069  | 7  | 253 |
| chr13:88329395-88329885   | chr13 | 88329395  | 88329885  | 0.650826727 | 0.534953334 | 0.115873392  | 3  | 254 |
| chr14:21537083-21537355   | chr14 | 21537083  | 21537355  | 0.696494324 | 0.587535691 | 0.108958633  | 1  | 255 |
| chr18:59992070-59993556   | chr18 | 59992070  | 59993556  | 0.368175131 | 0.282547636 | 0.085627495  | 9  | 256 |
| chr16:3355021-3356012     | chr16 | 3355021   | 3356012   | 0.712434003 | 0.604294825 | 0.108139178  | 7  | 257 |
| chr7:8301032-8302252      | chr7  | 8301032   | 8302252   | 0.357181513 | 0.266035559 | 0.091145954  | 10 | 258 |
| chr13:28363744-28364269   | chr13 | 28363744  | 28364269  | 0.878771563 | 0.743014469 | 0.135757094  | 3  | 259 |
| chr2:149645537-149645834  | chr2  | 149645537 | 149645834 | 0.613823281 | 0.516406449 | 0.097416832  | 3  | 260 |
| chr17:16310307-16310914   | chr17 | 16310307  | 16310914  | 0.58550408  | 0.500019018 | 0.085485062  | 3  | 261 |
| chr11:111385338-111385712 | chr11 | 111385338 | 111385712 | 0.663155557 | 0.557890994 | 0.105264562  | 6  | 262 |
| chr16:68563760-68564281   | chr16 | 68563760  | 68564281  | 0.552038523 | 0.466557098 | 0.085481425  | 6  | 263 |
| chr7:103086345-103086840  | chr7  | 103086345 | 103086840 | 0.478467674 | 0.393076885 | 0.085390789  | 5  | 264 |
| chr17:56326686-56327262   | chr17 | 56326686  | 56327262  | 0.694373566 | 0.600232032 | 0.094141534  | 3  | 265 |
| chr21:46351329-46352911   | chr21 | 46351329  | 46352911  | 0.709169364 | 0.602545769 | 0.106623595  | 6  | 266 |
| chr2:219757459-219758001  | chr2  | 219757459 | 219758001 | 0.361278125 | 0.276112024 | 0.085166101  | 4  | 267 |
| chr20:4202149-4202765     | chr20 | 4202149   | 4202765   | 0.60962924  | 0.516537857 | 0.093091383  | 3  | 268 |
| chr5:134914179-134914981  | chr5  | 134914179 | 134914981 | 0.838011577 | 0.711009932 | 0.127001645  | 4  | 269 |
| chr2:119599060-119599299  | chr2  | 119599060 | 119599299 | 0.879647177 | 0.733794304 | 0.145852873  | 1  | 270 |
| chr1:116710838-116711260  | chr1  | 116710838 | 116711260 | 0.739216925 | 0.626933376 | 0.11228355   | 3  | 271 |
| chr19:45954066-45954504   | chr19 | 45954066  | 45954504  | 0.402179384 | 0.297364642 | 0.104814742  | 2  | 272 |
| chr2:97173852-97174485    | chr2  | 97173852  | 97174485  | 0.73733559  | 0.630403236 | 0.106932354  | 10 | 273 |
| chr14:60336952-60337461   | chr14 | 60336952  | 60337461  | 0.593864571 | 0.480930244 | 0.112934327  | 3  | 274 |
| chr3:125075916-125076481  | chr3  | 125075916 | 125076481 | 0.546598514 | 0.439430073 | 0.107168441  | 4  | 275 |
| chr10:31422710-31423316   | chr10 | 31422710  | 31423316  | 0.518271273 | 0.398340639 | 0.119930634  | 3  | 276 |
| chr1:217262999-217263214  | chr1  | 217262999 | 217263214 | 0.792983634 | 0.671683809 | 0.121299825  | 1  | 277 |
| chr9:115652447-115653448  | chr9  | 115652447 | 115653448 | 0.869214062 | 0.739607208 | 0.129606855  | 2  | 278 |
| chr13:113540351-113540558 | chr13 | 113540351 | 113540558 | 0.603915751 | 0.461294119 | 0.142621632  | 4  | 279 |
| chr12:69327022-69327532   | chr12 | 69327022  | 69327532  | 0.711857055 | 0.605493183 | 0.106363872  | 4  | 280 |
| chr15:57025348-57026150   | chr15 | 57025348  | 57026150  | 0.654186475 | 0.570009015 | 0.08417746   | 6  | 281 |
| chr5:114937614-114938149  | chr5  | 114937614 | 114938149 | 0.620454874 | 0.527405578 | 0.093049296  | 6  | 282 |
| chr4:75719102-75719740    | chr4  | 75719102  | 75719740  | 0.655038651 | 0.52329564  | 0.131743012  | 4  | 283 |
| chr15:75248278-75249922   | chr15 | 75248278  | 75249922  | 0.663781269 | 0.577867303 | 0.085913966  | 11 | 284 |
| chr13:29105412-29105676   | chr13 | 29105412  | 29105676  | 0.758551715 | 0.645155309 | 0.113396406  | 3  | 285 |
| chr11:64038965-64039306   | chr11 | 64038965  | 64039306  | 0.476993547 | 0.364817657 | 0.11217589   | 4  | 286 |
| chr11:18742691-18743513   | chr11 | 18742691  | 18743513  | 0.593877007 | 0.50725149  | 0.086625517  | 3  | 287 |
| chr2:242498014-242499274  | chr2  | 242498014 | 242499274 | 0.637534819 | 0.542803678 | 0.094731141  | 7  | 288 |
| chr4:1049653-1049923      | chr4  | 1049653   | 1049923   | 0.838824155 | 0.724313743 | 0.114510412  | 3  | 289 |
| chr19:52674328-52674855   | chr19 | 52674328  | 52674855  | 0.227424804 | 0.144091865 | 0.083332939  | 3  | 290 |
| chr17:46669435-46669811   | chr17 | 46669435  | 46669811  | 0.803691333 | 0.666862917 | 0.136828416  | 8  | 291 |
| chr6:168841439-168841699  | chr6  | 168841439 | 168841699 | 0.813947368 | 0.691416397 | 0.12253097   | 4  | 292 |
| chr16:3639093-3639306     | chr16 | 3639093   | 3639306   | 0.789256998 | 0.670347658 | 0.11890934   | 1  | 293 |
| chr9:123605044-123605585  | chr9  | 123605044 | 123605585 | 0.865542479 | 0.732885531 | 0.132656948  | 4  | 294 |
| chr14:106025534-106026386 | chr14 | 106025534 | 106026386 | 0.700229949 | 0.594820899 | 0.10540905   | 1  | 295 |
| chr12:120031495-120033212 | chr12 | 120031495 | 120033212 | 0.54575779  | 0.44888556  | 0.096872229  | 9  | 296 |
| chr19:46181221-46181455   | chr19 | 46181221  | 46181455  | 0.862714402 | 0.732688471 | 0.130025931  | 4  | 297 |
| chr22:29467292-29467817   | chr22 | 29467292  | 29467817  | 0.724908236 | 0.620091308 | 0.104816928  | 2  | 298 |
| chr5:114514717-114516220  | chr5  | 114514717 | 114516220 | 0.488066498 | 0.402489732 | 0.085576766  | 10 | 299 |
| chr14:24020003-24020251   | chr14 | 24020003  | 24020251  | 0.428334079 | 0.32065738  | 0.107676699  | 3  | 300 |
| chr9:139580970-139582615  | chr9  | 139580970 | 139582615 | 0.59748068  | 0.514678838 | 0.082801842  | 4  | 301 |

|                           |       |           |           |             |             |              |    |     |
|---------------------------|-------|-----------|-----------|-------------|-------------|--------------|----|-----|
| chr19:11959578-11960064   | chr19 | 11959578  | 11960064  | 0.781482306 | 0.63555318  | 0.145929126  | 2  | 302 |
| chr17:42835777-42836242   | chr17 | 42835777  | 42836242  | 0.768516656 | 0.66554722  | 0.102969436  | 3  | 303 |
| chrY:4870745-4871225      | chrY  | 4870745   | 4871225   | 0.543484464 | 0.384185967 | 0.159298497  | 1  | 304 |
| chr3:62354292-62355012    | chr3  | 62354292  | 62355012  | 0.853053721 | 0.733320068 | 0.119733653  | 4  | 305 |
| chr7:77669671-77670057    | chr7  | 77669671  | 77670057  | 0.811595769 | 0.694568445 | 0.117027324  | 3  | 306 |
| chr10:11784408-11784937   | chr10 | 11784408  | 11784937  | 0.818181777 | 0.701961276 | 0.1162205    | 3  | 307 |
| chr11:62476771-62477481   | chr11 | 62476771  | 62477481  | 0.596752439 | 0.507344136 | 0.089408303  | 9  | 308 |
| chr19:58554355-58554587   | chr19 | 58554355  | 58554587  | 0.903272305 | 0.775199322 | 0.128072983  | 3  | 309 |
| chr16:34430776-34431004   | chr16 | 34430776  | 34431004  | 0.580299739 | 0.666839431 | -0.086539692 | 3  | 310 |
| chr13:95359642-95359874   | chr13 | 95359642  | 95359874  | 0.72504249  | 0.618749851 | 0.106292639  | 2  | 311 |
| chr2:127783082-127783311  | chr2  | 127783082 | 127783311 | 0.622450691 | 0.518800981 | 0.103649711  | 3  | 312 |
| chrX:101906002-101907017  | chrX  | 101906002 | 101907017 | 0.658612515 | 0.563297699 | 0.095314817  | 10 | 313 |
| chr6:168079012-168079213  | chr6  | 168079012 | 168079213 | 0.751219737 | 0.639175349 | 0.112044388  | 3  | 314 |
| chr3:156008992-156009320  | chr3  | 156008992 | 156009320 | 0.585607852 | 0.49080211  | 0.094805742  | 3  | 315 |
| chr20:49548195-49548525   | chr20 | 49548195  | 49548525  | 0.75616286  | 0.645114806 | 0.111048054  | 3  | 316 |
| chr3:13696628-13697127    | chr3  | 13696628  | 13697127  | 0.629209755 | 0.535211946 | 0.093997808  | 2  | 317 |
| chr10:81892223-81892640   | chr10 | 81892223  | 81892640  | 0.65099996  | 0.556355773 | 0.094644186  | 3  | 318 |
| chr2:88469692-88470386    | chr2  | 88469692  | 88470386  | 0.651899758 | 0.555954835 | 0.095944923  | 4  | 319 |
| chr12:75601082-75601752   | chr12 | 75601082  | 75601752  | 0.738726622 | 0.585882982 | 0.15284364   | 3  | 320 |
| chr19:47139338-47139547   | chr19 | 47139338  | 47139547  | 0.856573868 | 0.733230722 | 0.123343146  | 3  | 321 |
| chr9:39078690-39079006    | chr9  | 39078690  | 39079006  | 0.813739754 | 0.694586287 | 0.119153468  | 1  | 322 |
| chr12:54089212-54089413   | chr12 | 54089212  | 54089413  | 0.837175048 | 0.714704895 | 0.122470153  | 1  | 323 |
| chr7:38350921-38351331    | chr7  | 38350921  | 38351331  | 0.644570025 | 0.494141896 | 0.150428129  | 5  | 324 |
| chr13:36728963-36729267   | chr13 | 36728963  | 36729267  | 0.806910545 | 0.695009561 | 0.111900984  | 5  | 325 |
| chr8:142425441-142425716  | chr8  | 142425441 | 142425716 | 0.316795821 | 0.235334064 | 0.081461757  | 3  | 326 |
| chr11:64993281-64993484   | chr11 | 64993281  | 64993484  | 0.647206335 | 0.55741035  | 0.089795985  | 2  | 327 |
| chr16:90148484-90148793   | chr16 | 90148484  | 90148793  | 0.36416179  | 0.272028456 | 0.092133334  | 3  | 328 |
| chrY:14107138-14107480    | chrY  | 14107138  | 14107480  | 0.669797091 | 0.838528942 | -0.168731851 | 1  | 329 |
| chr1:159158229-159158498  | chr1  | 159158229 | 159158498 | 0.564270615 | 0.429388811 | 0.134881804  | 2  | 330 |
| chr14:29254366-29255069   | chr14 | 29254366  | 29255069  | 0.874133796 | 0.752445861 | 0.121687935  | 5  | 331 |
| chr16:51189801-51190260   | chr16 | 51189801  | 51190260  | 0.114043645 | 0.233265606 | -0.119221961 | 5  | 332 |
| chr7:21582444-21583313    | chr7  | 21582444  | 21583313  | 0.676406119 | 0.579528427 | 0.096877693  | 8  | 333 |
| chr6:150246753-150247257  | chr6  | 150246753 | 150247257 | 0.753464717 | 0.660217426 | 0.093247291  | 4  | 334 |
| chr4:188916606-188916876  | chr4  | 188916606 | 188916876 | 0.845042466 | 0.725835335 | 0.119207131  | 8  | 335 |
| chr1:181454975-181455261  | chr1  | 181454975 | 181455261 | 0.551744185 | 0.462403687 | 0.089340498  | 4  | 336 |
| chr13:28534433-28535560   | chr13 | 28534433  | 28535560  | 0.669950137 | 0.571660255 | 0.098289882  | 5  | 337 |
| chr2:43037868-43038564    | chr2  | 43037868  | 43038564  | 0.655786708 | 0.559977133 | 0.095809576  | 4  | 338 |
| chr12:122016171-122017693 | chr12 | 122016171 | 122017693 | 0.886376139 | 0.763245481 | 0.123130658  | 5  | 339 |
| chr3:134369465-134370242  | chr3  | 134369465 | 134370242 | 0.744720079 | 0.636383481 | 0.108336598  | 12 | 340 |
| chr7:75909704-75909906    | chr7  | 75909704  | 75909906  | 0.879398859 | 0.752309545 | 0.127089314  | 1  | 341 |
| chr6:30068493-30068794    | chr6  | 30068493  | 30068794  | 0.835473341 | 0.715332732 | 0.120140609  | 6  | 342 |
| chr7:27283409-27283614    | chr7  | 27283409  | 27283614  | 0.862187365 | 0.73890642  | 0.123280946  | 3  | 343 |
| chr19:8407675-8408338     | chr19 | 8407675   | 8408338   | 0.607529645 | 0.521217089 | 0.086312556  | 10 | 344 |
| chr1:32892429-32892835    | chr1  | 32892429  | 32892835  | 0.653500214 | 0.559027301 | 0.094472913  | 1  | 345 |
| chr6:50810643-50810994    | chr6  | 50810643  | 50810994  | 0.821644786 | 0.709734359 | 0.111910427  | 4  | 346 |
| chr2:128180295-128181381  | chr2  | 128180295 | 128181381 | 0.653932062 | 0.5592146   | 0.094717462  | 6  | 347 |
| chr20:30618794-30619138   | chr20 | 30618794  | 30619138  | 0.815941017 | 0.71979872  | 0.096142297  | 4  | 348 |
| chr3:129345668-129346521  | chr3  | 129345668 | 129346521 | 0.797789668 | 0.696194825 | 0.101594842  | 4  | 349 |
| chr7:156409024-156409294  | chr7  | 156409024 | 156409294 | 0.76946695  | 0.662513457 | 0.106953493  | 3  | 350 |
| chr20:26188639-26190348   | chr20 | 26188639  | 26190348  | 0.695478927 | 0.609332821 | 0.086146105  | 12 | 351 |
| chr1:22889596-22890096    | chr1  | 22889596  | 22890096  | 0.441886284 | 0.35284253  | 0.089043754  | 4  | 352 |
| chr12:131783094-131784199 | chr12 | 131783094 | 131784199 | 0.74519859  | 0.57518604  | 0.170012549  | 1  | 353 |
| chr1:221054555-221054888  | chr1  | 221054555 | 221054888 | 0.857142603 | 0.735686309 | 0.121456294  | 3  | 354 |
| chr7:112031476-112032181  | chr7  | 112031476 | 112032181 | 0.403743318 | 0.323617357 | 0.080125961  | 2  | 355 |
| chr3:52279602-52280140    | chr3  | 52279602  | 52280140  | 0.690418174 | 0.5947904   | 0.095627773  | 8  | 356 |
| chr11:32460587-32461004   | chr11 | 32460587  | 32461004  | 0.890303631 | 0.768970859 | 0.121332772  | 4  | 357 |
| chr19:53635626-53636230   | chr19 | 53635626  | 53636230  | 0.612848774 | 0.501561345 | 0.111287428  | 6  | 358 |
| chr3:129323916-129325332  | chr3  | 129323916 | 129325332 | 0.556915197 | 0.477024734 | 0.079890464  | 5  | 359 |
| chr2:207506775-207507422  | chr2  | 207506775 | 207507422 | 0.679513581 | 0.571143159 | 0.108370421  | 6  | 360 |
| chr3:27756213-27756422    | chr3  | 27756213  | 27756422  | 0.846169268 | 0.71639104  | 0.129778228  | 3  | 361 |
| chr17:38599670-38600306   | chr17 | 38599670  | 38600306  | 0.649207026 | 0.550618289 | 0.098588737  | 3  | 362 |
| chr6:43970074-43970922    | chr6  | 43970074  | 43970922  | 0.340434516 | 0.260931171 | 0.079503345  | 4  | 363 |
| chr9:139872238-139873143  | chr9  | 139872238 | 139873143 | 0.839489417 | 0.725613044 | 0.113876373  | 4  | 364 |
| chr6:50787287-50788091    | chr6  | 50787287  | 50788091  | 0.764882223 | 0.65630322  | 0.108579004  | 4  | 365 |
| chr11:17497464-17498626   | chr11 | 17497464  | 17498626  | 0.440577051 | 0.356146651 | 0.0844304    | 12 | 366 |
| chr6:75911580-75912133    | chr6  | 75911580  | 75912133  | 0.72455984  | 0.62214454  | 0.1024153    | 4  | 367 |
| chr1:166916866-166917215  | chr1  | 166916866 | 166917215 | 0.681654527 | 0.572842326 | 0.108812202  | 3  | 368 |
| chr16:30216739-30217851   | chr16 | 30216739  | 30217851  | 0.672482483 | 0.570366932 | 0.102115552  | 1  | 369 |
| chr19:49931204-49931804   | chr19 | 49931204  | 49931804  | 0.585574984 | 0.492404482 | 0.093170502  | 2  | 370 |
| chr3:139396339-139396882  | chr3  | 139396339 | 139396882 | 0.623721096 | 0.53803664  | 0.085684456  | 4  | 371 |
| chr14:38060842-38062119   | chr14 | 38060842  | 38062119  | 0.763993896 | 0.659398592 | 0.104595304  | 4  | 372 |
| chr6:26217212-26217521    | chr6  | 26217212  | 26217521  | 0.636860194 | 0.547186289 | 0.089673905  | 3  | 373 |
| chr7:6566067-6566650      | chr7  | 6566067   | 6566650   | 0.788932416 | 0.682710276 | 0.10622214   | 3  | 374 |
| chr15:51633725-51634318   | chr15 | 51633725  | 51634318  | 0.743359743 | 0.642007107 | 0.101352636  | 4  | 375 |
| chr14:23821088-23822106   | chr14 | 23821088  | 23822106  | 0.463535844 | 0.382448804 | 0.08108704   | 8  | 376 |
| chr9:130616620-130616858  | chr9  | 130616620 | 130616858 | 0.820517546 | 0.705463984 | 0.115053561  | 1  | 377 |

|                           |       |           |           |             |             |              |    |     |
|---------------------------|-------|-----------|-----------|-------------|-------------|--------------|----|-----|
| chr5:140767197-140767695  | chr5  | 140767197 | 140767695 | 0.550233032 | 0.46285852  | 0.087374512  | 7  | 378 |
| chr1:151300523-151300724  | chr1  | 151300523 | 151300724 | 0.55083478  | 0.465223852 | 0.085610928  | 3  | 379 |
| chr16:84029457-84029710   | chr16 | 84029457  | 84029710  | 0.875734526 | 0.757923172 | 0.117811353  | 4  | 380 |
| chr1:149871080-149871946  | chr1  | 149871080 | 149871946 | 0.622078789 | 0.528531768 | 0.093547021  | 7  | 381 |
| chr5:178322714-178323538  | chr5  | 178322714 | 178323538 | 0.774621141 | 0.662995063 | 0.111626079  | 6  | 382 |
| chr6:117591534-117592279  | chr6  | 117591534 | 117592279 | 0.832995226 | 0.715939971 | 0.117055255  | 4  | 383 |
| chr20:62947649-62948464   | chr20 | 62947649  | 62948464  | 0.212269099 | 0.095676352 | 0.116592747  | 3  | 384 |
| chr13:30982288-30982827   | chr13 | 30982288  | 30982827  | 0.205562009 | 0.127083196 | 0.078478813  | 3  | 385 |
| chr6:27858167-27858564    | chr6  | 27858167  | 27858564  | 0.840942221 | 0.720796186 | 0.120146035  | 3  | 386 |
| chr15:45408574-45409528   | chr15 | 45408574  | 45409528  | 0.857192431 | 0.743487014 | 0.113705417  | 4  | 387 |
| chr1:45308544-45309159    | chr1  | 45308544  | 45309159  | 0.175885166 | 0.097483234 | 0.078401932  | 4  | 388 |
| chr3:9595186-9595533      | chr3  | 9595186   | 9595533   | 0.563073117 | 0.481007651 | 0.082065466  | 2  | 389 |
| chr12:106975196-106975714 | chr12 | 106975196 | 106975714 | 0.602048704 | 0.51533251  | 0.086716194  | 3  | 390 |
| chr14:85997469-85998637   | chr14 | 85997469  | 85998637  | 0.482749551 | 0.389664446 | 0.093085106  | 6  | 391 |
| chr14:78432386-78432804   | chr14 | 78432386  | 78432804  | 0.757266187 | 0.646575175 | 0.110691012  | 3  | 392 |
| chr11:789872-790133       | chr11 | 789872    | 790133    | 0.073549491 | 0.151849627 | -0.078300136 | 2  | 393 |
| chr2:110872946-110873587  | chr2  | 110872946 | 110873587 | 0.700983909 | 0.590166714 | 0.110817195  | 4  | 394 |
| chr1:211589678-211590293  | chr1  | 211589678 | 211590293 | 0.612073584 | 0.533816902 | 0.078256681  | 3  | 395 |
| chr9:23822413-23822667    | chr9  | 23822413  | 23822667  | 0.938541054 | 0.808321018 | 0.130220036  | 1  | 396 |
| chr12:7046238-7047257     | chr12 | 7046238   | 7047257   | 0.441987669 | 0.363814595 | 0.078173074  | 4  | 397 |
| chr2:173099483-173100098  | chr2  | 173099483 | 173100098 | 0.604708625 | 0.508617298 | 0.096091326  | 4  | 398 |
| chr19:39894559-39894768   | chr19 | 39894559  | 39894768  | 0.584663861 | 0.501557598 | 0.083106263  | 4  | 399 |
| chr17:21279507-21281574   | chr17 | 21279507  | 21281574  | 0.767328225 | 0.666488852 | 0.100839373  | 16 | 400 |
| chr7:852961-853230        | chr7  | 852961    | 853230    | 0.442475849 | 0.342813482 | 0.099662367  | 3  | 401 |
| chr18:29303961-29304254   | chr18 | 29303961  | 29304254  | 0.784200138 | 0.672413456 | 0.111786682  | 2  | 402 |
| chr8:1094751-1094967      | chr8  | 1094751   | 1094967   | 0.821261277 | 0.709307351 | 0.111953926  | 3  | 403 |
| chr15:51387533-51387755   | chr15 | 51387533  | 51387755  | 0.887243568 | 0.765093306 | 0.122150263  | 4  | 404 |
| chr2:220377744-220377946  | chr2  | 220377744 | 220377946 | 0.753040939 | 0.650153509 | 0.10288743   | 3  | 405 |
| chr19:10542663-10543120   | chr19 | 10542663  | 10543120  | 0.797329665 | 0.688287152 | 0.109042512  | 2  | 406 |
| chr1:205537752-205538443  | chr1  | 205537752 | 205538443 | 0.614111079 | 0.536497451 | 0.077613628  | 7  | 407 |
| chr12:113917395-113918107 | chr12 | 113917395 | 113918107 | 0.645677319 | 0.541867026 | 0.103810293  | 6  | 408 |
| chr9:115913082-115913807  | chr9  | 115913082 | 115913807 | 0.494988491 | 0.306273433 | 0.188715058  | 3  | 409 |
| chr4:3485964-3486381      | chr4  | 3485964   | 3486381   | 0.722346594 | 0.626568646 | 0.095777948  | 4  | 410 |
| chr2:172951290-172952159  | chr2  | 172951290 | 172952159 | 0.883075343 | 0.76258133  | 0.120494013  | 5  | 411 |
| chr4:174448334-174448845  | chr4  | 174448334 | 174448845 | 0.909816654 | 0.78850854  | 0.121308114  | 4  | 412 |
| chr7:993402-994574        | chr7  | 993402    | 994574    | 0.364066801 | 0.283578869 | 0.080487932  | 2  | 413 |
| chr7:131242694-131243006  | chr7  | 131242694 | 131243006 | 0.7178563   | 0.620353573 | 0.097502727  | 3  | 414 |
| chr9:503937-505722        | chr9  | 503937    | 505722    | 0.646648005 | 0.535936646 | 0.110711359  | 5  | 415 |
| chr19:2462065-2462442     | chr19 | 2462065   | 2462442   | 0.882458658 | 0.762206601 | 0.120252057  | 2  | 416 |
| chr2:119602617-119604486  | chr2  | 119602617 | 119604486 | 0.749005197 | 0.647900885 | 0.101104311  | 13 | 417 |
| chr19:49340489-49340774   | chr19 | 49340489  | 49340774  | 0.703103142 | 0.60859633  | 0.094506811  | 4  | 418 |
| chr16:31008833-31009036   | chr16 | 31008833  | 31009036  | 0.786251236 | 0.678530291 | 0.107720945  | 2  | 419 |
| chr3:160822495-160823260  | chr3  | 160822495 | 160823260 | 0.70533334  | 0.605168949 | 0.100164391  | 8  | 420 |
| chr4:185939223-185942747  | chr4  | 185939223 | 185942747 | 0.654833452 | 0.561926001 | 0.092907452  | 28 | 421 |
| chr20:21000766-21001280   | chr20 | 21000766  | 21001280  | 0.902833992 | 0.787097872 | 0.11573612   | 3  | 422 |
| chr11:124628368-124629590 | chr11 | 124628368 | 124629590 | 0.857492023 | 0.747923346 | 0.109568678  | 3  | 423 |
| chr18:76069223-76069699   | chr18 | 76069223  | 76069699  | 0.59255707  | 0.710695565 | -0.118138495 | 4  | 424 |
| chr15:83001661-83002634   | chr15 | 83001661  | 83002634  | 0.302843779 | 0.226212743 | 0.076631035  | 1  | 425 |
| chr15:96904723-96905050   | chr15 | 96904723  | 96905050  | 0.896458556 | 0.77643429  | 0.120024266  | 3  | 426 |
| chr6:27833121-27833406    | chr6  | 27833121  | 27833406  | 0.57725782  | 0.482647606 | 0.094610214  | 4  | 427 |
| chr3:170303533-170303768  | chr3  | 170303533 | 170303768 | 0.608322381 | 0.525773042 | 0.082549338  | 3  | 428 |
| chr6:38682950-38683265    | chr6  | 38682950  | 38683265  | 0.873111752 | 0.756698952 | 0.1164128    | 3  | 429 |
| chr17:77903888-77904397   | chr17 | 77903888  | 77904397  | 0.542293621 | 0.465916528 | 0.076377092  | 5  | 430 |
| chr2:132182328-132183101  | chr2  | 132182328 | 132183101 | 0.772669731 | 0.659035557 | 0.113634174  | 3  | 431 |
| chr3:126108020-126108488  | chr3  | 126108020 | 126108488 | 0.312541669 | 0.236243581 | 0.076298088  | 3  | 432 |
| chr16:49314038-49316543   | chr16 | 49314038  | 49316543  | 0.618186304 | 0.516737512 | 0.101448792  | 10 | 433 |
| chr1:87617693-87617986    | chr1  | 87617693  | 87617986  | 0.830402604 | 0.716772188 | 0.113630416  | 4  | 434 |
| chrX:136134511-136135269  | chrX  | 136134511 | 136135269 | 0.792743252 | 0.686479011 | 0.106264242  | 3  | 435 |
| chr2:176956505-176956707  | chr2  | 176956505 | 176956707 | 0.908973667 | 0.781259848 | 0.127713818  | 2  | 436 |
| chr1:50882434-50882660    | chr1  | 50882434  | 50882660  | 0.919787034 | 0.795873746 | 0.123913288  | 1  | 437 |
| chr11:119612092-119612476 | chr11 | 119612092 | 119612476 | 0.371172314 | 0.273866116 | 0.097306198  | 3  | 438 |
| chr16:67208068-67208678   | chr16 | 67208068  | 67208678  | 0.398275108 | 0.322261287 | 0.076013821  | 3  | 439 |
| chr16:56650982-56651384   | chr16 | 56650982  | 56651384  | 0.78231176  | 0.651850616 | 0.130461145  | 4  | 440 |
| chr20:44685772-44687610   | chr20 | 44685772  | 44687610  | 0.821609114 | 0.711453594 | 0.11015552   | 4  | 441 |
| chr14:89493136-89494382   | chr14 | 89493136  | 89494382  | 0.710711477 | 0.632594569 | 0.078116908  | 5  | 442 |
| chr11:126873092-126873809 | chr11 | 126873092 | 126873809 | 0.300639377 | 0.224868294 | 0.075771083  | 6  | 443 |
| chr10:16561605-16563822   | chr10 | 16561605  | 16563822  | 0.654757659 | 0.578504574 | 0.076253085  | 8  | 444 |
| chr10:135203102-135203316 | chr10 | 135203102 | 135203316 | 0.851155789 | 0.738412247 | 0.112743542  | 2  | 445 |
| chr12:7023262-7024089     | chr12 | 7023262   | 7024089   | 0.478276232 | 0.402653545 | 0.075622687  | 11 | 446 |
| chr2:177042752-177043444  | chr2  | 177042752 | 177043444 | 0.641660539 | 0.553053362 | 0.088607177  | 5  | 447 |
| chr7:976648-976894        | chr7  | 976648    | 976894    | 0.735560329 | 0.849041004 | -0.113480675 | 1  | 448 |
| chr4:42152767-42154984    | chr4  | 42152767  | 42154984  | 0.547984959 | 0.417005617 | 0.130979342  | 12 | 449 |
| chrX:36975506-36976349    | chrX  | 36975506  | 36976349  | 0.630525776 | 0.54710624  | 0.083419536  | 4  | 450 |
| chr10:135039938-135040196 | chr10 | 135039938 | 135040196 | 0.874322165 | 0.758629456 | 0.115692708  | 3  | 451 |
| chr3:50230431-50232344    | chr3  | 50230431  | 50232344  | 0.732842335 | 0.647868615 | 0.08497372   | 5  | 452 |
| chr9:14346266-14348149    | chr9  | 14346266  | 14348149  | 0.874381499 | 0.742629794 | 0.131751705  | 3  | 453 |

|                           |       |           |           |             |             |              |    |     |
|---------------------------|-------|-----------|-----------|-------------|-------------|--------------|----|-----|
| chr2:175204844-175207553  | chr2  | 175204844 | 175207553 | 0.731188812 | 0.627326481 | 0.103862331  | 13 | 454 |
| chr15:98971491-98971876   | chr15 | 98971491  | 98971876  | 0.162551762 | 0.087323407 | 0.075228355  | 3  | 455 |
| chr17:58212843-58213193   | chr17 | 58212843  | 58213193  | 0.649583193 | 0.562646261 | 0.086936932  | 5  | 456 |
| chr5:172068287-172069174  | chr5  | 172068287 | 172069174 | 0.815896258 | 0.714900267 | 0.100995991  | 3  | 457 |
| chr8:124172801-124173541  | chr8  | 124172801 | 124173541 | 0.892191803 | 0.774557789 | 0.117634015  | 5  | 458 |
| chr1:9242168-9243827      | chr1  | 9242168   | 9243827   | 0.781596229 | 0.685546422 | 0.096049807  | 7  | 459 |
| chr6:106958233-106958718  | chr6  | 106958233 | 106958718 | 0.798678302 | 0.694013287 | 0.104665016  | 5  | 460 |
| chr6:28457569-28457926    | chr6  | 28457569  | 28457926  | 0.894088854 | 0.756489076 | 0.137599779  | 2  | 461 |
| chr11:111383169-111383892 | chr11 | 111383169 | 111383892 | 0.650437116 | 0.543408314 | 0.107028802  | 8  | 462 |
| chr12:65514879-65515863   | chr12 | 65514879  | 65515863  | 0.700438927 | 0.619224792 | 0.081214135  | 7  | 463 |
| chr5:95768875-95769080    | chr5  | 95768875  | 95769080  | 0.593141311 | 0.502538914 | 0.090602397  | 7  | 464 |
| chr10:43361553-43362350   | chr10 | 43361553  | 43362350  | 0.696799923 | 0.609811215 | 0.086988707  | 5  | 465 |
| chr16:85203158-85203941   | chr16 | 85203158  | 85203941  | 0.761411793 | 0.660427595 | 0.100984198  | 2  | 466 |
| chr18:77280145-77280414   | chr18 | 77280145  | 77280414  | 0.925305304 | 0.803567685 | 0.121737619  | 3  | 467 |
| chr12:52701963-52702560   | chr12 | 52701963  | 52702560  | 0.615304161 | 0.504341501 | 0.110962659  | 5  | 468 |
| chr12:12849068-12849270   | chr12 | 12849068  | 12849270  | 0.579607005 | 0.504693255 | 0.074913749  | 7  | 469 |
| chr3:147142182-147142391  | chr3  | 147142182 | 147142391 | 0.904820191 | 0.785469508 | 0.119350683  | 3  | 470 |
| chr4:169799087-169799625  | chr4  | 169799087 | 169799625 | 0.873097951 | 0.743466465 | 0.129631486  | 3  | 471 |
| chr1:18971730-18972097    | chr1  | 18971730  | 18972097  | 0.897806561 | 0.780065351 | 0.11774121   | 3  | 472 |
| chr20:61339859-61341220   | chr20 | 61339859  | 61341220  | 0.645822465 | 0.570379098 | 0.075443367  | 9  | 473 |
| chr9:140040092-140040698  | chr9  | 140040092 | 140040698 | 0.805777212 | 0.699393666 | 0.106383546  | 1  | 474 |
| chr8:65281904-65283043    | chr8  | 65281904  | 65283043  | 0.71542011  | 0.591577592 | 0.123842518  | 5  | 475 |
| chr20:57581903-57582595   | chr20 | 57581903  | 57582595  | 0.72173558  | 0.628749246 | 0.092986334  | 9  | 476 |
| chr14:89017661-89017972   | chr14 | 89017661  | 89017972  | 0.666607879 | 0.578794445 | 0.087813435  | 2  | 477 |
| chr17:35289389-35289623   | chr17 | 35289389  | 35289623  | 0.723258974 | 0.6289898   | 0.094269174  | 2  | 478 |
| chr7:129142172-129143038  | chr7  | 129142172 | 129143038 | 0.530313055 | 0.453210692 | 0.077102363  | 4  | 479 |
| chr2:233925092-233925318  | chr2  | 233925092 | 233925318 | 0.835791562 | 0.715852138 | 0.119939424  | 2  | 480 |
| chr2:66652692-66654218    | chr2  | 66652692  | 66654218  | 0.59660553  | 0.489329213 | 0.107276317  | 6  | 481 |
| chr10:118927022-118928132 | chr10 | 118927022 | 118928132 | 0.690615198 | 0.604906384 | 0.085708814  | 5  | 482 |
| chr20:57463653-57467739   | chr20 | 57463653  | 57467739  | 0.613647028 | 0.524434376 | 0.089212653  | 54 | 483 |
| chrX:152909014-152909214  | chrX  | 152909014 | 152909214 | 0.508496088 | 0.434281358 | 0.07421473   | 3  | 484 |
| chr19:1766145-1766364     | chr19 | 1766145   | 1766364   | 0.675019917 | 0.572525102 | 0.102494816  | 2  | 485 |
| chr15:75470912-75471212   | chr15 | 75470912  | 75471212  | 0.72355907  | 0.624988409 | 0.098570661  | 4  | 486 |
| chr11:22454301-22454518   | chr11 | 22454301  | 22454518  | 0.879734971 | 0.767391422 | 0.112343549  | 3  | 487 |
| chr1:75595814-75596162    | chr1  | 75595814  | 75596162  | 0.868569963 | 0.738878972 | 0.129690992  | 3  | 488 |
| chr12:50297581-50297988   | chr12 | 50297581  | 50297988  | 0.814068042 | 0.707348146 | 0.106719896  | 6  | 489 |
| chr2:8723856-8724093      | chr2  | 8723856   | 8724093   | 0.690193114 | 0.589023586 | 0.101169528  | 3  | 490 |
| chr3:196255496-196256013  | chr3  | 196255496 | 196256013 | 0.906197033 | 0.788385903 | 0.11781113   | 4  | 491 |
| chr8:2480426-2480920      | chr8  | 2480426   | 2480920   | 0.604714002 | 0.530778172 | 0.073935829  | 3  | 492 |
| chr5:172386894-172387102  | chr5  | 172386894 | 172387102 | 0.523979503 | 0.450134768 | 0.073844736  | 3  | 493 |
| chr19:8674333-8674764     | chr19 | 8674333   | 8674764   | 0.320282825 | 0.404336011 | -0.084053186 | 2  | 494 |
| chr15:90293222-90294733   | chr15 | 90293222  | 90294733  | 0.605910302 | 0.526627441 | 0.079282861  | 9  | 495 |
| chr7:97361133-97363018    | chr7  | 97361133  | 97363018  | 0.650259168 | 0.487890135 | 0.162369033  | 10 | 496 |
| chrX:53713069-53713794    | chrX  | 53713069  | 53713794  | 0.45369692  | 0.374626156 | 0.079070763  | 7  | 497 |
| chr4:379900-380399        | chr4  | 379900    | 380399    | 0.719830013 | 0.622317142 | 0.097512871  | 4  | 498 |
| chr1:43832815-43833073    | chr1  | 43832815  | 43833073  | 0.846196165 | 0.738682038 | 0.107514126  | 3  | 499 |
| chr7:27231806-27233097    | chr7  | 27231806  | 27233097  | 0.640724984 | 0.557625015 | 0.083099969  | 7  | 500 |
| chr8:1649440-1649759      | chr8  | 1649440   | 1649759   | 0.785159426 | 0.682808493 | 0.102350932  | 2  | 501 |
| chr22:45898295-45899357   | chr22 | 45898295  | 45899357  | 0.500092741 | 0.418775536 | 0.081317205  | 7  | 502 |
| chr19:3228730-3228992     | chr19 | 3228730   | 3228992   | 0.737408204 | 0.654304442 | 0.083103762  | 2  | 503 |
| chr7:150019951-150020752  | chr7  | 150019951 | 150020752 | 0.564745709 | 0.491280696 | 0.073465013  | 11 | 504 |
| chr2:177039552-177039951  | chr2  | 177039552 | 177039951 | 0.908463912 | 0.788355506 | 0.120108406  | 3  | 505 |
| chr3:8808962-8811280      | chr3  | 8808962   | 8811280   | 0.721099105 | 0.647633327 | 0.073465778  | 12 | 506 |
| chr9:37034136-37038341    | chr9  | 37034136  | 37038341  | 0.890420115 | 0.776534299 | 0.113885815  | 13 | 507 |
| chr2:241562470-241562910  | chr2  | 241562470 | 241562910 | 0.81657548  | 0.711146152 | 0.105429327  | 4  | 508 |
| chr20:2672905-2674698     | chr20 | 2672905   | 2674698   | 0.648131144 | 0.574811301 | 0.073319843  | 6  | 509 |
| chr17:3438842-3439046     | chr17 | 3438842   | 3439046   | 0.56173627  | 0.488502471 | 0.073233799  | 4  | 510 |
| chr17:42733487-42734626   | chr17 | 42733487  | 42734626  | 0.633826932 | 0.551766031 | 0.082060901  | 11 | 511 |
| chr8:143879595-143879806  | chr8  | 143879595 | 143879806 | 0.868864816 | 0.756200747 | 0.112664069  | 1  | 512 |
| chr11:116706482-116706910 | chr11 | 116706482 | 116706910 | 0.537813529 | 0.452028869 | 0.085784661  | 4  | 513 |
| chr17:40912817-40913553   | chr17 | 40912817  | 40913553  | 0.768704441 | 0.673704251 | 0.09500019   | 5  | 514 |
| chr18:55862654-55862873   | chr18 | 55862654  | 55862873  | 0.897711672 | 0.782554349 | 0.115157323  | 5  | 515 |
| chr18:76732971-76734765   | chr18 | 76732971  | 76734765  | 0.655602184 | 0.532119283 | 0.1234829    | 4  | 516 |
| chr3:44596536-44597018    | chr3  | 44596536  | 44597018  | 0.78918524  | 0.693719183 | 0.095466057  | 5  | 517 |
| chr7:156801419-156801632  | chr7  | 156801419 | 156801632 | 0.839084266 | 0.732160786 | 0.10692348   | 2  | 518 |
| chr19:3933474-3933816     | chr19 | 3933474   | 3933816   | 0.243145715 | 0.170139814 | 0.073005901  | 3  | 519 |
| chr10:125425496-125426642 | chr10 | 125425496 | 125426642 | 0.831415551 | 0.72556949  | 0.10584606   | 7  | 520 |
| chr12:113900751-113906442 | chr12 | 113900751 | 113906442 | 0.748073203 | 0.656663864 | 0.091409339  | 23 | 521 |
| chr6:132271357-132271658  | chr6  | 132271357 | 132271658 | 0.838652827 | 0.733820919 | 0.104831908  | 3  | 522 |
| chr12:186864-187610       | chr12 | 186864    | 187610    | 0.560425781 | 0.40237784  | 0.158047941  | 3  | 523 |
| chr4:154713538-154714240  | chr4  | 154713538 | 154714240 | 0.938410661 | 0.817551331 | 0.12085933   | 3  | 524 |
| chr16:2892580-2892810     | chr16 | 2892580   | 2892810   | 0.907210246 | 0.790616375 | 0.116593872  | 5  | 525 |
| chr16:82660652-82661813   | chr16 | 82660652  | 82661813  | 0.726085707 | 0.631568937 | 0.09451677   | 7  | 526 |
| chr19:41102846-41103281   | chr19 | 41102846  | 41103281  | 0.646959129 | 0.562330109 | 0.084629021  | 3  | 527 |
| chr5:155107505-155108934  | chr5  | 155107505 | 155108934 | 0.661351455 | 0.557938083 | 0.103413372  | 7  | 528 |
| chr19:29284314-29285010   | chr19 | 29284314  | 29285010  | 0.418878228 | 0.331565986 | 0.087312242  | 3  | 529 |

|                           |       |           |           |             |             |              |    |     |
|---------------------------|-------|-----------|-----------|-------------|-------------|--------------|----|-----|
| chr15:27215952-27216856   | chr15 | 27215952  | 27216856  | 0.641094419 | 0.531484431 | 0.109609989  | 12 | 530 |
| chr17:46658949-46660003   | chr17 | 46658949  | 46660003  | 0.74321073  | 0.650379514 | 0.092831215  | 6  | 531 |
| chr4:8429930-8430441      | chr4  | 8429930   | 8430441   | 0.206151236 | 0.133845495 | 0.072305742  | 6  | 532 |
| chr5:523677-524887        | chr5  | 523677    | 524887    | 0.608046356 | 0.535557948 | 0.072488408  | 8  | 533 |
| chr9:126770664-126772091  | chr9  | 126770664 | 126772091 | 0.107773038 | 0.180046602 | -0.072273564 | 3  | 534 |
| chr16:89990070-89990507   | chr16 | 89990070  | 89990507  | 0.318735209 | 0.39099643  | -0.072261221 | 3  | 535 |
| chr5:145722468-145722925  | chr5  | 145722468 | 145722925 | 0.849437893 | 0.743767391 | 0.105670501  | 5  | 536 |
| chr9:123638821-123639936  | chr9  | 123638821 | 123639936 | 0.19203649  | 0.119843092 | 0.072193399  | 3  | 537 |
| chr5:2738954-2741237      | chr5  | 2738954   | 2741237   | 0.693856877 | 0.606751014 | 0.087105863  | 7  | 538 |
| chr14:92789495-92790712   | chr14 | 92789495  | 92790712  | 0.666100173 | 0.586442341 | 0.079657831  | 7  | 539 |
| chr17:6945390-6947521     | chr17 | 6945390   | 6947521   | 0.693137626 | 0.608256101 | 0.084881525  | 14 | 540 |
| chr8:89339966-89340481    | chr8  | 89339966  | 89340481  | 0.38215584  | 0.31007922  | 0.072076621  | 5  | 541 |
| chr1:181287301-181287873  | chr1  | 181287301 | 181287873 | 0.300695904 | 0.221910732 | 0.078785171  | 6  | 542 |
| chr8:53851702-53854426    | chr8  | 53851702  | 53854426  | 0.600180362 | 0.505101421 | 0.095078941  | 15 | 543 |
| chr1:16163753-16164123    | chr1  | 16163753  | 16164123  | 0.89392383  | 0.779649986 | 0.114273844  | 4  | 544 |
| chr9:44227155-44227529    | chr9  | 44227155  | 44227529  | 0.447447068 | 0.370817029 | 0.076630039  | 2  | 545 |
| chr2:120281662-120282211  | chr2  | 120281662 | 120282211 | 0.779303522 | 0.684680901 | 0.094622621  | 4  | 546 |
| chr7:100075304-100075551  | chr7  | 100075304 | 100075551 | 0.472637876 | 0.400664398 | 0.071973479  | 5  | 547 |
| chr5:122424338-122424539  | chr5  | 122424338 | 122424539 | 0.509515045 | 0.437577261 | 0.071937784  | 3  | 548 |
| chr10:29011054-29011453   | chr10 | 29011054  | 29011453  | 0.776934835 | 0.676990633 | 0.099944202  | 2  | 549 |
| chr11:504190-504659       | chr11 | 504190    | 504659    | 0.909170376 | 0.79020602  | 0.118964356  | 2  | 550 |
| chr6:26020672-26021125    | chr6  | 26020672  | 26021125  | 0.805087764 | 0.702723795 | 0.102363969  | 6  | 551 |
| chr19:53039078-53039920   | chr19 | 53039078  | 53039920  | 0.753184226 | 0.657100582 | 0.096083645  | 4  | 552 |
| chr12:66135121-66136400   | chr12 | 66135121  | 66136400  | 0.61086366  | 0.512506115 | 0.098357545  | 5  | 553 |
| chr6:161100093-161100456  | chr6  | 161100093 | 161100456 | 0.881978688 | 0.777747269 | 0.104231419  | 3  | 554 |
| chr16:80965953-80966478   | chr16 | 80965953  | 80966478  | 0.852224257 | 0.744273469 | 0.107950788  | 5  | 555 |
| chr2:45161428-45163058    | chr2  | 45161428  | 45163058  | 0.668932519 | 0.580500286 | 0.088432233  | 5  | 556 |
| chr9:34623513-34624081    | chr9  | 34623513  | 34624081  | 0.879350558 | 0.767557401 | 0.111793157  | 2  | 557 |
| chr7:127775630-127776442  | chr7  | 127775630 | 127776442 | 0.23427466  | 0.161143601 | 0.073131059  | 4  | 558 |
| chr19:53193140-53193945   | chr19 | 53193140  | 53193945  | 0.385375484 | 0.314058971 | 0.071316513  | 5  | 559 |
| chr19:932599-932845       | chr19 | 932599    | 932845    | 0.882519762 | 0.770945334 | 0.111574428  | 2  | 560 |
| chr7:54612325-54612558    | chr7  | 54612325  | 54612558  | 0.53276191  | 0.41736434  | 0.11539757   | 3  | 561 |
| chr14:100751673-100752339 | chr14 | 100751673 | 100752339 | 0.436032348 | 0.364799393 | 0.071232954  | 4  | 562 |
| chr5:140734721-140735028  | chr5  | 140734721 | 140735028 | 0.537400694 | 0.466174701 | 0.071225993  | 4  | 563 |
| chr1:67600391-67600715    | chr1  | 67600391  | 67600715  | 0.868137499 | 0.760016661 | 0.108120838  | 4  | 564 |
| chr19:54481413-54481955   | chr19 | 54481413  | 54481955  | 0.436888292 | 0.362425837 | 0.074462455  | 3  | 565 |
| chr17:75524590-75525152   | chr17 | 75524590  | 75525152  | 0.386638568 | 0.269436033 | 0.117202535  | 5  | 566 |
| chr18:76486314-76486864   | chr18 | 76486314  | 76486864  | 0.622241591 | 0.7499815   | -0.127739909 | 3  | 567 |
| chr16:82044887-82045306   | chr16 | 82044887  | 82045306  | 0.786577425 | 0.689132586 | 0.09744484   | 7  | 568 |
| chr15:37179517-37179782   | chr15 | 37179517  | 37179782  | 0.68894092  | 0.582003748 | 0.106937172  | 4  | 569 |
| chr19:18335073-18337375   | chr19 | 18335073  | 18337375  | 0.521450408 | 0.450595743 | 0.070854664  | 14 | 570 |
| chr9:112917-114839        | chr9  | 112917    | 114839    | 0.535711094 | 0.446544031 | 0.089167063  | 5  | 571 |
| chr2:176949512-176949795  | chr2  | 176949512 | 176949795 | 0.883637777 | 0.743138064 | 0.140499714  | 3  | 572 |
| chr2:114033360-114033617  | chr2  | 114033360 | 114033617 | 0.914316347 | 0.800331016 | 0.113985331  | 3  | 573 |
| chr9:19127180-19127880    | chr9  | 19127180  | 19127880  | 0.784077241 | 0.686104955 | 0.097972286  | 2  | 574 |
| chr4:2305515-2305793      | chr4  | 2305515   | 2305793   | 0.174557459 | 0.329803832 | -0.155246373 | 1  | 575 |
| chr4:111539907-111540127  | chr4  | 111539907 | 111540127 | 0.889704571 | 0.77825845  | 0.111446121  | 3  | 576 |
| chr8:1113059-1114073      | chr8  | 1113059   | 1114073   | 0.837404965 | 0.736536165 | 0.1008688    | 4  | 577 |
| chr22:38793181-38793451   | chr22 | 38793181  | 38793451  | 0.436709429 | 0.366201627 | 0.070507803  | 1  | 578 |
| chr17:1395120-1395372     | chr17 | 1395120   | 1395372   | 0.856641895 | 0.748976073 | 0.107665822  | 1  | 579 |
| chr3:38179858-38180689    | chr3  | 38179858  | 38180689  | 0.522755522 | 0.412345772 | 0.110409751  | 10 | 580 |
| chr12:25538133-25538344   | chr12 | 25538133  | 25538344  | 0.898674446 | 0.782982366 | 0.11569208   | 3  | 581 |
| chr19:6740670-6741203     | chr19 | 6740670   | 6741203   | 0.71204244  | 0.605426755 | 0.106615685  | 6  | 582 |
| chr1:46859725-46860291    | chr1  | 46859725  | 46860291  | 0.121035549 | 0.206477192 | -0.085441643 | 6  | 583 |
| chr20:56803283-56804112   | chr20 | 56803283  | 56804112  | 0.806342637 | 0.686129713 | 0.120212924  | 3  | 584 |
| chr9:132499969-132500553  | chr9  | 132499969 | 132500553 | 0.706154348 | 0.614655237 | 0.091499111  | 2  | 585 |
| chr14:32672537-32672915   | chr14 | 32672537  | 32672915  | 0.140961275 | 0.070720813 | 0.070240463  | 3  | 586 |
| chr3:133646095-133646650  | chr3  | 133646095 | 133646650 | 0.536192759 | 0.463696267 | 0.072496492  | 2  | 587 |
| chr2:127863643-127865288  | chr2  | 127863643 | 127865288 | 0.382345474 | 0.31039364  | 0.071951833  | 11 | 588 |
| chr9:34589114-34591978    | chr9  | 34589114  | 34591978  | 0.790028755 | 0.681208498 | 0.108820257  | 9  | 589 |
| chr1:41326950-41328285    | chr1  | 41326950  | 41328285  | 0.656964277 | 0.576542358 | 0.080421919  | 11 | 590 |
| chr2:158453800-158454111  | chr2  | 158453800 | 158454111 | 0.564694083 | 0.484712328 | 0.079981755  | 4  | 591 |
| chr19:708531-708742       | chr19 | 708531    | 708742    | 0.463207066 | 0.393081863 | 0.070125203  | 4  | 592 |
| chr9:139024317-139025832  | chr9  | 139024317 | 139025832 | 0.693238546 | 0.607458052 | 0.085780494  | 4  | 593 |
| chr10:28287448-28288057   | chr10 | 28287448  | 28288057  | 0.34909286  | 0.278970156 | 0.070122705  | 9  | 594 |
| chr3:178978949-178979364  | chr3  | 178978949 | 178979364 | 0.482569923 | 0.412480434 | 0.070089489  | 4  | 595 |
| chr7:143582126-143582610  | chr7  | 143582126 | 143582610 | 0.725546258 | 0.649225264 | 0.076320994  | 3  | 596 |
| chr1:11708768-11709277    | chr1  | 11708768  | 11709277  | 0.649745195 | 0.572775444 | 0.076969751  | 4  | 597 |
| chr19:18896516-18896860   | chr19 | 18896516  | 18896860  | 0.832141706 | 0.737180182 | 0.094961524  | 3  | 598 |
| chr5:74349801-74350239    | chr5  | 74349801  | 74350239  | 0.898379048 | 0.792826224 | 0.105552824  | 4  | 599 |
| chr21:19617099-19617874   | chr21 | 19617099  | 19617874  | 0.412838319 | 0.321609172 | 0.091229147  | 4  | 600 |
| chr13:19918586-19919221   | chr13 | 19918586  | 19919221  | 0.799840595 | 0.712497489 | 0.087343106  | 5  | 601 |
| chrX:7895078-7895608      | chrX  | 7895078   | 7895608   | 0.384719439 | 0.277101921 | 0.107617518  | 9  | 602 |
| chr2:172944989-172945384  | chr2  | 172944989 | 172945384 | 0.887184234 | 0.752957949 | 0.134226284  | 5  | 603 |
| chr2:119605201-119605620  | chr2  | 119605201 | 119605620 | 0.556966408 | 0.476376962 | 0.080589446  | 4  | 604 |
| chr17:26578273-26578682   | chr17 | 26578273  | 26578682  | 0.852220124 | 0.754475367 | 0.097744757  | 3  | 605 |

|                           |       |           |           |             |             |              |    |     |
|---------------------------|-------|-----------|-----------|-------------|-------------|--------------|----|-----|
| chr18:67069934-67070171   | chr18 | 67069934  | 67070171  | 0.671559102 | 0.576316768 | 0.095242334  | 4  | 606 |
| chr12:122356316-122356853 | chr12 | 122356316 | 122356853 | 0.911338869 | 0.802458609 | 0.10888026   | 6  | 607 |
| chr16:21294981-21295414   | chr16 | 21294981  | 21295414  | 0.309697812 | 0.154292455 | 0.155405357  | 2  | 608 |
| chr19:10589682-10590041   | chr19 | 10589682  | 10590041  | 0.885574571 | 0.77843399  | 0.107140581  | 4  | 609 |
| chr20:44746823-44747060   | chr20 | 44746823  | 44747060  | 0.814578486 | 0.723617253 | 0.090961233  | 5  | 610 |
| chr11:69924339-69925197   | chr11 | 69924339  | 69925197  | 0.408588715 | 0.299940122 | 0.108648592  | 6  | 611 |
| chr22:17081937-17082595   | chr22 | 17081937  | 17082595  | 0.677735061 | 0.593891426 | 0.083843635  | 2  | 612 |
| chr3:27765197-27765675    | chr3  | 27765197  | 27765675  | 0.918090073 | 0.788186587 | 0.129903486  | 5  | 613 |
| chr20:30777757-30778329   | chr20 | 30777757  | 30778329  | 0.728544705 | 0.639026284 | 0.08951842   | 3  | 614 |
| chr8:80695831-80696458    | chr8  | 80695831  | 80696458  | 0.703314647 | 0.616214625 | 0.087100022  | 4  | 615 |
| chr14:38057139-38057798   | chr14 | 38057139  | 38057798  | 0.738672111 | 0.647366597 | 0.091305514  | 2  | 616 |
| chr19:55667533-55668465   | chr19 | 55667533  | 55668465  | 0.626080558 | 0.550336825 | 0.075743733  | 4  | 617 |
| chr19:44763979-44764312   | chr19 | 44763979  | 44764312  | 0.084161255 | 0.153318359 | -0.069157104 | 4  | 618 |
| chr5:67584214-67584451    | chr5  | 67584214  | 67584451  | 0.742284505 | 0.651120898 | 0.091163607  | 5  | 619 |
| chr20:61447686-61448891   | chr20 | 61447686  | 61448891  | 0.749552326 | 0.657378792 | 0.092173534  | 23 | 620 |
| chr16:863279-863917       | chr16 | 863279    | 863917    | 0.653171885 | 0.573158676 | 0.080013209  | 3  | 621 |
| chr9:127539240-127540081  | chr9  | 127539240 | 127540081 | 0.581382022 | 0.507168184 | 0.074213838  | 4  | 622 |
| chr10:82168065-82168917   | chr10 | 82168065  | 82168917  | 0.365460991 | 0.245892889 | 0.119568102  | 7  | 623 |
| chr9:97021465-97021967    | chr9  | 97021465  | 97021967  | 0.225775967 | 0.134695686 | 0.09108028   | 2  | 624 |
| chr8:40755165-40755404    | chr8  | 40755165  | 40755404  | 0.195926224 | 0.267371371 | -0.071445147 | 4  | 625 |
| chr2:628910-629190        | chr2  | 628910    | 629190    | 0.787780096 | 0.864720023 | -0.076939927 | 4  | 626 |
| chr8:6691834-6693135      | chr8  | 6691834   | 6693135   | 0.583935738 | 0.507085236 | 0.076850502  | 9  | 627 |
| chr9:137393049-137393305  | chr9  | 137393049 | 137393305 | 0.822029484 | 0.722470017 | 0.099559467  | 3  | 628 |
| chr10:22764709-22767050   | chr10 | 22764709  | 22767050  | 0.820096747 | 0.739639819 | 0.080456929  | 7  | 629 |
| chr17:44438566-44439569   | chr17 | 44438566  | 44439569  | 0.38265798  | 0.31386518  | 0.0687928    | 1  | 630 |
| chr5:76249436-76250528    | chr5  | 76249436  | 76250528  | 0.67362828  | 0.549501226 | 0.124127054  | 6  | 631 |
| chr19:41633777-41634047   | chr19 | 41633777  | 41634047  | 0.517674353 | 0.44896564  | 0.068708712  | 3  | 632 |
| chr2:946882-947286        | chr2  | 946882    | 947286    | 0.88419418  | 0.776882592 | 0.107311588  | 3  | 633 |
| chr6:74405601-74406021    | chr6  | 74405601  | 74406021  | 0.611798653 | 0.536274797 | 0.075523856  | 3  | 634 |
| chr10:112402954-112404328 | chr10 | 112402954 | 112404328 | 0.697341545 | 0.607802726 | 0.089538819  | 5  | 635 |
| chr6:45387347-45388164    | chr6  | 45387347  | 45388164  | 0.799763539 | 0.703668355 | 0.096095184  | 5  | 636 |
| chr22:39323204-39323528   | chr22 | 39323204  | 39323528  | 0.932300262 | 0.819338106 | 0.112962156  | 3  | 637 |
| chr2:945687-946774        | chr2  | 945687    | 946774    | 0.178686975 | 0.110147127 | 0.068539848  | 4  | 638 |
| chr16:84538885-84539115   | chr16 | 84538885  | 84539115  | 0.785817332 | 0.693971149 | 0.091846183  | 3  | 639 |
| chr1:26249206-26249613    | chr1  | 26249206  | 26249613  | 0.648457085 | 0.570910413 | 0.077546672  | 4  | 640 |
| chr4:17782643-17783624    | chr4  | 17782643  | 17783624  | 0.666440774 | 0.55277946  | 0.113661315  | 12 | 641 |
| chr2:131673687-131674150  | chr2  | 131673687 | 131674150 | 0.870665564 | 0.765137548 | 0.105528015  | 4  | 642 |
| chr12:52400468-52401696   | chr12 | 52400468  | 52401696  | 0.87755542  | 0.775619255 | 0.101936165  | 8  | 643 |
| chr16:450835-451140       | chr16 | 450835    | 451140    | 0.88396101  | 0.776661381 | 0.107299629  | 4  | 644 |
| chr19:47217162-47217555   | chr19 | 47217162  | 47217555  | 0.902248143 | 0.794280134 | 0.107968009  | 5  | 645 |
| chr2:95401381-95401636    | chr2  | 95401381  | 95401636  | 0.589475103 | 0.517052217 | 0.072422885  | 1  | 646 |
| chr5:28927606-28928637    | chr5  | 28927606  | 28928637  | 0.597110853 | 0.672809709 | -0.075698855 | 3  | 647 |
| chr8:101661672-101662022  | chr8  | 101661672 | 101662022 | 0.659160344 | 0.577770263 | 0.081390081  | 7  | 648 |
| chr11:416420-417650       | chr11 | 416420    | 417650    | 0.747953399 | 0.649139965 | 0.098813434  | 8  | 649 |
| chr5:172661487-172662228  | chr5  | 172661487 | 172662228 | 0.481119965 | 0.412966952 | 0.068153013  | 5  | 650 |
| chr4:94755787-94756310    | chr4  | 94755787  | 94756310  | 0.935065008 | 0.821496094 | 0.113568915  | 2  | 651 |
| chr12:115124730-115125152 | chr12 | 115124730 | 115125152 | 0.89580711  | 0.786419013 | 0.109388097  | 4  | 652 |
| chr1:33358470-33359449    | chr1  | 33358470  | 33359449  | 0.639080601 | 0.560510222 | 0.078570378  | 4  | 653 |
| chr19:49199965-49200184   | chr19 | 49199965  | 49200184  | 0.862796194 | 0.75440294  | 0.108393254  | 3  | 654 |
| chr14:106145949-106146803 | chr14 | 106145949 | 106146803 | 0.844122762 | 0.741266043 | 0.102856719  | 1  | 655 |
| chr19:17404960-17405377   | chr19 | 17404960  | 17405377  | 0.581536407 | 0.649565691 | -0.068029284 | 4  | 656 |
| chr19:675672-675881       | chr19 | 675672    | 675881    | 0.716676309 | 0.641627851 | 0.075048458  | 3  | 657 |
| chr15:45814336-45815344   | chr15 | 45814336  | 45815344  | 0.164735913 | 0.096738521 | 0.067997392  | 8  | 658 |
| chr11:64815041-64815722   | chr11 | 64815041  | 64815722  | 0.912157849 | 0.801938926 | 0.110218923  | 3  | 659 |
| chr5:7849946-7850439      | chr5  | 7849946   | 7850439   | 0.863117499 | 0.758789554 | 0.104327945  | 4  | 660 |
| chr20:3218579-3220930     | chr20 | 3218579   | 3220930   | 0.707531086 | 0.63256572  | 0.074965365  | 9  | 661 |
| chr19:40005649-40005869   | chr19 | 40005649  | 40005869  | 0.558444751 | 0.490045134 | 0.068399617  | 7  | 662 |
| chr17:19648140-19648492   | chr17 | 19648140  | 19648492  | 0.543707555 | 0.476024313 | 0.067683243  | 3  | 663 |
| chr4:25865064-25865376    | chr4  | 25865064  | 25865376  | 0.87766098  | 0.771496003 | 0.106164977  | 3  | 664 |
| chr3:127794370-127796136  | chr3  | 127794370 | 127796136 | 0.84040193  | 0.72490531  | 0.11549662   | 6  | 665 |
| chr1:1289708-1291126      | chr1  | 1289708   | 1291126   | 0.646254461 | 0.571236709 | 0.075017752  | 7  | 666 |
| chr1:109203594-109204378  | chr1  | 109203594 | 109204378 | 0.888225051 | 0.76686917  | 0.12135588   | 7  | 667 |
| chr6:44187187-44187400    | chr6  | 44187187  | 44187400  | 0.75333971  | 0.661937702 | 0.091402008  | 2  | 668 |
| chr3:159756633-159756997  | chr3  | 159756633 | 159756997 | 0.671355132 | 0.587160444 | 0.084194687  | 5  | 669 |
| chr4:85404987-85405252    | chr4  | 85404987  | 85405252  | 0.921873766 | 0.798273552 | 0.123600214  | 2  | 670 |
| chr22:48970858-48972947   | chr22 | 48970858  | 48972947  | 0.693800818 | 0.610699995 | 0.083100823  | 8  | 671 |
| chr2:85664695-85665055    | chr2  | 85664695  | 85665055  | 0.635649384 | 0.558098953 | 0.077550431  | 4  | 672 |
| chr2:241395249-241395802  | chr2  | 241395249 | 241395802 | 0.853642716 | 0.750187595 | 0.103455122  | 4  | 673 |
| chr11:66314208-66314455   | chr11 | 66314208  | 66314455  | 0.843646733 | 0.742053337 | 0.101593397  | 5  | 674 |
| chr19:17982671-17983821   | chr19 | 17982671  | 17983821  | 0.42225839  | 0.354877347 | 0.067381042  | 10 | 675 |
| chr10:12390803-12392589   | chr10 | 12390803  | 12392589  | 0.351445506 | 0.279901949 | 0.071543557  | 7  | 676 |
| chr12:113572978-113573758 | chr12 | 113572978 | 113573758 | 0.586802363 | 0.516919092 | 0.069883271  | 9  | 677 |
| chr1:86621279-86622871    | chr1  | 86621279  | 86622871  | 0.441091239 | 0.370115316 | 0.070975923  | 10 | 678 |
| chr5:131346893-131347776  | chr5  | 131346893 | 131347776 | 0.342861391 | 0.275691427 | 0.067169964  | 9  | 679 |
| chr8:57359900-57360114    | chr8  | 57359900  | 57360114  | 0.63411182  | 0.551463737 | 0.082648083  | 4  | 680 |
| chr1:55007705-55008448    | chr1  | 55007705  | 55008448  | 0.179427136 | 0.112286456 | 0.06714068   | 9  | 681 |

|                           |       |           |           |             |             |              |    |     |
|---------------------------|-------|-----------|-----------|-------------|-------------|--------------|----|-----|
| chr11:124790815-124791354 | chr11 | 124790815 | 124791354 | 0.851001508 | 0.723200308 | 0.1278012    | 3  | 682 |
| chr19:50193021-50194798   | chr19 | 50193021  | 50194798  | 0.74099425  | 0.651913206 | 0.089081044  | 10 | 683 |
| chr16:67183209-67184968   | chr16 | 67183209  | 67184968  | 0.897942736 | 0.794329967 | 0.103612769  | 7  | 684 |
| chr21:15351909-15352658   | chr21 | 15351909  | 15352658  | 0.729391947 | 0.642554989 | 0.086836958  | 4  | 685 |
| chr17:3599053-3599551     | chr17 | 3599053   | 3599551   | 0.700181597 | 0.59224962  | 0.107931977  | 4  | 686 |
| chr12:127210779-127211651 | chr12 | 127210779 | 127211651 | 0.740745484 | 0.654373299 | 0.086372184  | 2  | 687 |
| chr2:121101047-121101432  | chr2  | 121101047 | 121101432 | 0.396661407 | 0.329732525 | 0.066928882  | 3  | 688 |
| chr2:106886119-106886738  | chr2  | 106886119 | 106886738 | 0.256421839 | 0.189493343 | 0.066928497  | 5  | 689 |
| chr9:969530-973276        | chr9  | 969530    | 973276    | 0.898675938 | 0.769270784 | 0.129405154  | 14 | 690 |
| chr10:135436148-135436805 | chr10 | 135436148 | 135436805 | 0.740570725 | 0.656575058 | 0.083995667  | 3  | 691 |
| chr9:46132797-46133096    | chr9  | 46132797  | 46133096  | 0.712089108 | 0.626240464 | 0.085848644  | 1  | 692 |
| chr3:147113609-147114479  | chr3  | 147113609 | 147114479 | 0.812064258 | 0.708152411 | 0.103911846  | 5  | 693 |
| chr6:30523287-30523519    | chr6  | 30523287  | 30523519  | 0.283847093 | 0.217093595 | 0.066753499  | 9  | 694 |
| chr2:9614195-9615235      | chr2  | 9614195   | 9615235   | 0.417715131 | 0.336328144 | 0.081386986  | 9  | 695 |
| chr1:26551518-26552194    | chr1  | 26551518  | 26552194  | 0.876576771 | 0.770817779 | 0.105758991  | 5  | 696 |
| chr17:16520939-16521317   | chr17 | 16520939  | 16521317  | 0.684573936 | 0.606151315 | 0.078422621  | 2  | 697 |
| chr12:49318487-49319476   | chr12 | 49318487  | 49319476  | 0.717301129 | 0.631152764 | 0.086148365  | 14 | 698 |
| chr4:154074384-154075045  | chr4  | 154074384 | 154075045 | 0.212481346 | 0.128024464 | 0.084456882  | 3  | 699 |
| chr2:89064494-89065513    | chr2  | 89064494  | 89065513  | 0.753790203 | 0.669745032 | 0.084045171  | 10 | 700 |
| chr4:38869402-38869780    | chr4  | 38869402  | 38869780  | 0.574965452 | 0.479479121 | 0.095486331  | 7  | 701 |
| chr6:32116591-32117229    | chr6  | 32116591  | 32117229  | 0.91499677  | 0.807739416 | 0.107257354  | 17 | 702 |
| chr16:89268493-89268865   | chr16 | 89268493  | 89268865  | 0.59919529  | 0.482817419 | 0.116377871  | 2  | 703 |
| chr3:147108512-147111703  | chr3  | 147108512 | 147111703 | 0.800816578 | 0.693921868 | 0.10689471   | 20 | 704 |
| chr2:131792238-131793189  | chr2  | 131792238 | 131793189 | 0.660099604 | 0.586930855 | 0.073168749  | 4  | 705 |
| chr18:56934834-56936827   | chr18 | 56934834  | 56936827  | 0.70734599  | 0.588729042 | 0.118616948  | 7  | 706 |
| chr3:119041383-119042255  | chr3  | 119041383 | 119042255 | 0.148567582 | 0.082249173 | 0.06631841   | 4  | 707 |
| chr7:32801485-32801972    | chr7  | 32801485  | 32801972  | 0.598699341 | 0.528161535 | 0.070537807  | 3  | 708 |
| chr1:183774194-183774416  | chr1  | 183774194 | 183774416 | 0.194426765 | 0.128190753 | 0.066236012  | 2  | 709 |
| chr10:119293918-119297675 | chr10 | 119293918 | 119297675 | 0.8357463   | 0.742197523 | 0.093548776  | 20 | 710 |
| chr2:108602825-108603467  | chr2  | 108602825 | 108603467 | 0.624782983 | 0.50500888  | 0.119774103  | 10 | 711 |
| chr14:65016517-65016909   | chr14 | 65016517  | 65016909  | 0.923282458 | 0.807962622 | 0.115319836  | 6  | 712 |
| chr16:67564059-67564332   | chr16 | 67564059  | 67564332  | 0.906805631 | 0.798510906 | 0.108294725  | 1  | 713 |
| chr16:89259556-89260000   | chr16 | 89259556  | 89260000  | 0.308394665 | 0.401351103 | -0.092956438 | 2  | 714 |
| chr17:32484008-32484280   | chr17 | 32484008  | 32484280  | 0.782563512 | 0.685840094 | 0.096723418  | 6  | 715 |
| chr2:5831188-5831413      | chr2  | 5831188   | 5831413   | 0.754983389 | 0.665874108 | 0.08910928   | 2  | 716 |
| chr13:69558905-69559304   | chr13 | 69558905  | 69559304  | 0.69740392  | 0.622349918 | 0.075054003  | 4  | 717 |
| chr5:77805754-77806313    | chr5  | 77805754  | 77806313  | 0.728254338 | 0.639475709 | 0.088778629  | 4  | 718 |
| chr1:217310750-217311178  | chr1  | 217310750 | 217311178 | 0.844727406 | 0.744779637 | 0.099947769  | 6  | 719 |
| chr16:84401958-84402497   | chr16 | 84401958  | 84402497  | 0.701835601 | 0.603218623 | 0.098616978  | 4  | 720 |
| chr3:13520913-13521319    | chr3  | 13520913  | 13521319  | 0.783167544 | 0.682186907 | 0.100980637  | 12 | 721 |
| chr16:750399-751451       | chr16 | 750399    | 751451    | 0.706980975 | 0.630093199 | 0.076887776  | 5  | 722 |
| chr15:89952272-89953061   | chr15 | 89952272  | 89953061  | 0.902709018 | 0.796355959 | 0.106353059  | 7  | 723 |
| chr19:34175345-34175768   | chr19 | 34175345  | 34175768  | 0.339624115 | 0.273869741 | 0.065754374  | 6  | 724 |
| chr15:91208320-91209026   | chr15 | 91208320  | 91209026  | 0.688475529 | 0.606097963 | 0.082377566  | 5  | 725 |
| chr2:98962874-98964187    | chr2  | 98962874  | 98964187  | 0.572407865 | 0.485896232 | 0.086511633  | 9  | 726 |
| chr2:242549374-242549995  | chr2  | 242549374 | 242549995 | 0.250424257 | 0.184745275 | 0.065678981  | 4  | 727 |
| chr3:44754100-44754399    | chr3  | 44754100  | 44754399  | 0.42604836  | 0.356584302 | 0.069464058  | 7  | 728 |
| chr20:22559554-22560001   | chr20 | 22559554  | 22560001  | 0.937774489 | 0.826670676 | 0.111103812  | 3  | 729 |
| chr19:7980971-7982983     | chr19 | 7980971   | 7982983   | 0.463433994 | 0.384601411 | 0.078832582  | 5  | 730 |
| chr3:147138917-147139564  | chr3  | 147138917 | 147139564 | 0.895413043 | 0.788491369 | 0.106921674  | 3  | 731 |
| chr17:53342199-53343061   | chr17 | 53342199  | 53343061  | 0.427708798 | 0.362090376 | 0.065618422  | 5  | 732 |
| chr8:82192379-82193685    | chr8  | 82192379  | 82193685  | 0.532654232 | 0.430503595 | 0.102150636  | 13 | 733 |
| chr10:31073836-31074433   | chr10 | 31073836  | 31074433  | 0.679508991 | 0.601030921 | 0.07847807   | 4  | 734 |
| chr16:52581294-52581610   | chr16 | 52581294  | 52581610  | 0.674835969 | 0.609253384 | 0.065582585  | 3  | 735 |
| chr8:38831593-38832353    | chr8  | 38831593  | 38832353  | 0.896581775 | 0.792615876 | 0.103965898  | 6  | 736 |
| chr17:45771108-45772993   | chr17 | 45771108  | 45772993  | 0.647305709 | 0.535592616 | 0.111713093  | 10 | 737 |
| chr6:36628587-36628997    | chr6  | 36628587  | 36628997  | 0.909564019 | 0.802977206 | 0.106586813  | 2  | 738 |
| chr3:157260667-157261224  | chr3  | 157260667 | 157261224 | 0.890687851 | 0.778753024 | 0.111934828  | 9  | 739 |
| chr16:1208358-1208721     | chr16 | 1208358   | 1208721   | 0.833816554 | 0.734810274 | 0.09900628   | 1  | 740 |
| chr7:50342896-50343456    | chr7  | 50342896  | 50343456  | 0.72604898  | 0.660639475 | 0.065409505  | 3  | 741 |
| chr19:9896564-9896994     | chr19 | 9896564   | 9896994   | 0.224435083 | 0.149958939 | 0.074476144  | 4  | 742 |
| chr15:65203731-65204392   | chr15 | 65203731  | 65204392  | 0.682576642 | 0.603366761 | 0.079209881  | 8  | 743 |
| chr5:43040846-43041161    | chr5  | 43040846  | 43041161  | 0.35350523  | 0.288147593 | 0.065357636  | 4  | 744 |
| chr10:135341256-135342561 | chr10 | 135341256 | 135342561 | 0.772780691 | 0.701326986 | 0.071453705  | 6  | 745 |
| chr20:23028404-23032218   | chr20 | 23028404  | 23032218  | 0.550320925 | 0.484972906 | 0.065348019  | 17 | 746 |
| chr12:57853716-57853973   | chr12 | 57853716  | 57853973  | 0.149121834 | 0.083880672 | 0.065241162  | 4  | 747 |
| chr19:7938333-7939779     | chr19 | 7938333   | 7939779   | 0.519050541 | 0.423075117 | 0.095975425  | 5  | 748 |
| chr14:105992500-105996414 | chr14 | 105992500 | 105996414 | 0.540864011 | 0.475718757 | 0.065145254  | 13 | 749 |
| chr7:45960138-45961347    | chr7  | 45960138  | 45961347  | 0.553217705 | 0.44557218  | 0.107645525  | 10 | 750 |
| chr19:16394451-16394662   | chr19 | 16394451  | 16394662  | 0.875967483 | 0.772861329 | 0.103106154  | 3  | 751 |
| chr1:2232311-2232617      | chr1  | 2232311   | 2232617   | 0.806176354 | 0.712256046 | 0.093920308  | 3  | 752 |
| chr16:89160019-89160706   | chr16 | 89160019  | 89160706  | 0.132155069 | 0.197203755 | -0.065048686 | 7  | 753 |
| chr7:89747893-89749036    | chr7  | 89747893  | 89749036  | 0.456945823 | 0.380155904 | 0.076789919  | 14 | 754 |
| chr15:34786493-34788138   | chr15 | 34786493  | 34788138  | 0.699423386 | 0.608370999 | 0.091052387  | 5  | 755 |
| chr16:70414430-70415865   | chr16 | 70414430  | 70415865  | 0.187054279 | 0.122041719 | 0.065012559  | 5  | 756 |
| chr15:37387387-37387614   | chr15 | 37387387  | 37387614  | 0.843405836 | 0.739745352 | 0.103660484  | 4  | 757 |

|                           |       |           |           |             |             |              |    |     |
|---------------------------|-------|-----------|-----------|-------------|-------------|--------------|----|-----|
| chr20:21683745-21684420   | chr20 | 21683745  | 21684420  | 0.872530032 | 0.774659641 | 0.097870391  | 4  | 758 |
| chr2:102803673-102804556  | chr2  | 102803673 | 102804556 | 0.893386246 | 0.791310212 | 0.102076035  | 3  | 759 |
| chr1:31158010-31158261    | chr1  | 31158010  | 31158261  | 0.587150883 | 0.518647467 | 0.068503416  | 4  | 760 |
| chr7:155174129-155175248  | chr7  | 155174129 | 155175248 | 0.852415962 | 0.750450941 | 0.101965021  | 7  | 761 |
| chr1:160053722-160054738  | chr1  | 160053722 | 160054738 | 0.728956886 | 0.646955987 | 0.0820009    | 5  | 762 |
| chr4:177713244-177714457  | chr4  | 177713244 | 177714457 | 0.441675744 | 0.36746335  | 0.074212394  | 6  | 763 |
| chr6:10415019-10415318    | chr6  | 10415019  | 10415318  | 0.481133811 | 0.416262418 | 0.064871393  | 4  | 764 |
| chr11:30038935-30039148   | chr11 | 30038935  | 30039148  | 0.873594232 | 0.770435034 | 0.103159199  | 3  | 765 |
| chr9:139090421-139095472  | chr9  | 139090421 | 139095472 | 0.781519505 | 0.703272338 | 0.078247166  | 17 | 766 |
| chr22:31741046-31743707   | chr22 | 31741046  | 31743707  | 0.444409745 | 0.373458303 | 0.070951443  | 10 | 767 |
| chr4:154605087-154606052  | chr4  | 154605087 | 154606052 | 0.809875376 | 0.713531788 | 0.096343588  | 5  | 768 |
| chr1:114696887-114697185  | chr1  | 114696887 | 114697185 | 0.461008667 | 0.35797647  | 0.103032197  | 4  | 769 |
| chr3:119421856-119422334  | chr3  | 119421856 | 119422334 | 0.937888689 | 0.827163909 | 0.110724779  | 4  | 770 |
| chr20:48184194-48184833   | chr20 | 48184194  | 48184833  | 0.624384212 | 0.553323011 | 0.071061201  | 5  | 771 |
| chr8:65488537-65489116    | chr8  | 65488537  | 65489116  | 0.825935735 | 0.702145252 | 0.123790483  | 5  | 772 |
| chrX:68369819-68370085    | chrX  | 68369819  | 68370085  | 0.703547388 | 0.620142443 | 0.083404945  | 2  | 773 |
| chr5:180229376-180230147  | chr5  | 180229376 | 180230147 | 0.422105746 | 0.33238474  | 0.089721007  | 7  | 774 |
| chr9:139262002-139262396  | chr9  | 139262002 | 139262396 | 0.879920127 | 0.776388414 | 0.103531713  | 1  | 775 |
| chr4:1107126-1107728      | chr4  | 1107126   | 1107728   | 0.824542793 | 0.745086201 | 0.079456593  | 7  | 776 |
| chr12:52262628-52263215   | chr12 | 52262628  | 52263215  | 0.876667332 | 0.764593583 | 0.112073749  | 2  | 777 |
| chr9:140033236-140034176  | chr9  | 140033236 | 140034176 | 0.77301089  | 0.670963734 | 0.102047156  | 3  | 778 |
| chr20:36226618-36226841   | chr20 | 36226618  | 36226841  | 0.767044165 | 0.679017077 | 0.088027088  | 2  | 779 |
| chr19:15619224-15619613   | chr19 | 15619224  | 15619613  | 0.371937785 | 0.229064962 | 0.142872823  | 3  | 780 |
| chrX:70150676-70151002    | chrX  | 70150676  | 70151002  | 0.676770033 | 0.59479209  | 0.081977944  | 3  | 781 |
| chr8:144800958-144801335  | chr8  | 144800958 | 144801335 | 0.799924628 | 0.72069988  | 0.079224748  | 3  | 782 |
| chr5:76925446-76926875    | chr5  | 76925446  | 76926875  | 0.455671849 | 0.386589509 | 0.06908234   | 7  | 783 |
| chr13:36044845-36045481   | chr13 | 36044845  | 36045481  | 0.867102999 | 0.735151681 | 0.131951318  | 6  | 784 |
| chr19:12889084-12889343   | chr19 | 12889084  | 12889343  | 0.586992024 | 0.517745505 | 0.069246519  | 2  | 785 |
| chr19:56135774-56136007   | chr19 | 56135774  | 56136007  | 0.121190965 | 0.056981263 | 0.064209702  | 2  | 786 |
| chr2:2654109-2654358      | chr2  | 2654109   | 2654358   | 0.383851587 | 0.450652136 | -0.066800549 | 1  | 787 |
| chr18:77905298-77905566   | chr18 | 77905298  | 77905566  | 0.503719147 | 0.359803868 | 0.143915279  | 5  | 788 |
| chr10:102489344-102491011 | chr10 | 102489344 | 102491011 | 0.432699283 | 0.361426262 | 0.071273021  | 5  | 789 |
| chr3:122745184-122746986  | chr3  | 122745184 | 122746986 | 0.48843538  | 0.418699014 | 0.069736366  | 8  | 790 |
| chr9:1045542-1046394      | chr9  | 1045542   | 1046394   | 0.821358139 | 0.689795948 | 0.131562191  | 3  | 791 |
| chrX:118616427-118616886  | chrX  | 118616427 | 118616886 | 0.440942786 | 0.505068287 | -0.064125501 | 3  | 792 |
| chr10:43800154-43800445   | chr10 | 43800154  | 43800445  | 0.788871928 | 0.697761755 | 0.091110173  | 4  | 793 |
| chr12:54424611-54425173   | chr12 | 54424611  | 54425173  | 0.894152885 | 0.79014781  | 0.104005075  | 4  | 794 |
| chr16:58058713-58058928   | chr16 | 58058713  | 58058928  | 0.835284123 | 0.73317767  | 0.102106453  | 2  | 795 |
| chr3:52008944-52009339    | chr3  | 52008944  | 52009339  | 0.612189396 | 0.540148963 | 0.072040433  | 3  | 796 |
| chr8:99438693-99440425    | chr8  | 99438693  | 99440425  | 0.362811829 | 0.293612088 | 0.069199741  | 9  | 797 |
| chr1:204159599-204159833  | chr1  | 204159599 | 204159833 | 0.822054038 | 0.727473233 | 0.094580804  | 3  | 798 |
| chr2:43019666-43020509    | chr2  | 43019666  | 43020509  | 0.589340292 | 0.508483284 | 0.080857008  | 9  | 799 |
| chr1:6301696-6302856      | chr1  | 6301696   | 6302856   | 0.669378319 | 0.588673616 | 0.080704703  | 4  | 800 |
| chr7:130794690-130795032  | chr7  | 130794690 | 130795032 | 0.296645102 | 0.232766943 | 0.063878158  | 7  | 801 |
| chr17:27038085-27038919   | chr17 | 27038085  | 27038919  | 0.602371415 | 0.535762254 | 0.06660916   | 6  | 802 |
| chr11:44330543-44331761   | chr11 | 44330543  | 44331761  | 0.666956181 | 0.588466483 | 0.078489698  | 8  | 803 |
| chr3:37493419-37494538    | chr3  | 37493419  | 37494538  | 0.443786901 | 0.379980019 | 0.063806882  | 6  | 804 |
| chr1:113044411-113044992  | chr1  | 113044411 | 113044992 | 0.589791721 | 0.526007403 | 0.063784318  | 3  | 805 |
| chr1:1072370-1072847      | chr1  | 1072370   | 1072847   | 0.855810346 | 0.757378018 | 0.098432328  | 3  | 806 |
| chr15:30260496-30261394   | chr15 | 30260496  | 30261394  | 0.567546242 | 0.50228043  | 0.065265813  | 4  | 807 |
| chr21:43654847-43655465   | chr21 | 43654847  | 43655465  | 0.685416751 | 0.621717971 | 0.063698781  | 4  | 808 |
| chr9:133884360-133885010  | chr9  | 133884360 | 133885010 | 0.596586639 | 0.532891083 | 0.063695556  | 2  | 809 |
| chr10:130008559-130009620 | chr10 | 130008559 | 130009620 | 0.618929796 | 0.555253396 | 0.063676399  | 6  | 810 |
| chr2:127782614-127782829  | chr2  | 127782614 | 127782829 | 0.708904417 | 0.625936507 | 0.08296791   | 2  | 811 |
| chr7:75931705-75932978    | chr7  | 75931705  | 75932978  | 0.695775335 | 0.608217198 | 0.087558137  | 16 | 812 |
| chr19:2041824-2042593     | chr19 | 2041824   | 2042593   | 0.656469156 | 0.579759642 | 0.076709514  | 7  | 813 |
| chr2:74729400-74731166    | chr2  | 74729400  | 74731166  | 0.731272133 | 0.643119925 | 0.088152208  | 17 | 814 |
| chr7:4764685-4765252      | chr7  | 4764685   | 4765252   | 0.820817882 | 0.726677262 | 0.09414062   | 3  | 815 |
| chr2:96990858-96991283    | chr2  | 96990858  | 96991283  | 0.893255439 | 0.784680851 | 0.108574588  | 6  | 816 |
| chr3:36985541-36987041    | chr3  | 36985541  | 36987041  | 0.877653381 | 0.769410396 | 0.108242986  | 12 | 817 |
| chr14:75447512-75447779   | chr14 | 75447512  | 75447779  | 0.603719456 | 0.672166087 | -0.068446631 | 3  | 818 |
| chr9:71394794-71395492    | chr9  | 71394794  | 71395492  | 0.175504702 | 0.104978906 | 0.070525796  | 5  | 819 |
| chr1:91182098-91182364    | chr1  | 91182098  | 91182364  | 0.552208223 | 0.488776079 | 0.063432144  | 4  | 820 |
| chr18:44337511-44338100   | chr18 | 44337511  | 44338100  | 0.88480835  | 0.767445502 | 0.117362848  | 5  | 821 |
| chr20:31170741-31173640   | chr20 | 31170741  | 31173640  | 0.3157134   | 0.252314535 | 0.063398865  | 8  | 822 |
| chr11:44087519-44088165   | chr11 | 44087519  | 44088165  | 0.604855213 | 0.520736583 | 0.08411863   | 9  | 823 |
| chr6:36807679-36808808    | chr6  | 36807679  | 36808808  | 0.665411804 | 0.586220401 | 0.079191404  | 6  | 824 |
| chr6:42858170-42858960    | chr6  | 42858170  | 42858960  | 0.351922017 | 0.288591138 | 0.063330879  | 11 | 825 |
| chr11:63775347-63775613   | chr11 | 63775347  | 63775613  | 0.82335484  | 0.727771742 | 0.095583099  | 3  | 826 |
| chr17:60729646-60730269   | chr17 | 60729646  | 60730269  | 0.390658188 | 0.327328298 | 0.06332989   | 3  | 827 |
| chr2:237086728-237088463  | chr2  | 237086728 | 237088463 | 0.906512596 | 0.803001257 | 0.103511339  | 8  | 828 |
| chr8:121137100-121137778  | chr8  | 121137100 | 121137778 | 0.258930084 | 0.195066858 | 0.063863226  | 4  | 829 |
| chr7:6010076-6010408      | chr7  | 6010076   | 6010408   | 0.907606059 | 0.802257022 | 0.105349036  | 1  | 830 |
| chr2:96093012-96093247    | chr2  | 96093012  | 96093247  | 0.801978761 | 0.708786017 | 0.093192744  | 1  | 831 |
| chr12:54338762-54339168   | chr12 | 54338762  | 54339168  | 0.882138439 | 0.770693593 | 0.111444846  | 3  | 832 |
| chr15:40728263-40728466   | chr15 | 40728263  | 40728466  | 0.811972315 | 0.711680146 | 0.10029217   | 2  | 833 |



|                           |       |           |           |             |             |              |    |     |
|---------------------------|-------|-----------|-----------|-------------|-------------|--------------|----|-----|
| chr7:6654746-6655860      | chr7  | 6654746   | 6655860   | 0.435451753 | 0.366071082 | 0.069380672  | 5  | 834 |
| chr15:41135720-41137210   | chr15 | 41135720  | 41137210  | 0.665073334 | 0.586568075 | 0.078505259  | 12 | 835 |
| chr2:162930234-162930879  | chr2  | 162930234 | 162930879 | 0.24945952  | 0.186284255 | 0.063175265  | 6  | 836 |
| chr19:11531279-11531590   | chr19 | 11531279  | 11531590  | 0.686245686 | 0.590595224 | 0.095650462  | 5  | 837 |
| chr1:53392881-53393645    | chr1  | 53392881  | 53393645  | 0.495987612 | 0.433005187 | 0.062982425  | 7  | 838 |
| chr4:4387594-4389919      | chr4  | 4387594   | 4389919   | 0.524919634 | 0.418534673 | 0.106384962  | 13 | 839 |
| chr18:47018435-47018948   | chr18 | 47018435  | 47018948  | 0.161912989 | 0.098947049 | 0.06296594   | 5  | 840 |
| chr6:134210640-134211218  | chr6  | 134210640 | 134211218 | 0.911890667 | 0.807194379 | 0.104696288  | 5  | 841 |
| chr7:39649254-39649510    | chr7  | 39649254  | 39649510  | 0.894618087 | 0.794356172 | 0.100261915  | 4  | 842 |
| chr2:232469148-232469379  | chr2  | 232469148 | 232469379 | 0.345036492 | 0.282252321 | 0.062784172  | 2  | 843 |
| chr3:125931736-125932535  | chr3  | 125931736 | 125932535 | 0.705316133 | 0.596906327 | 0.108409806  | 5  | 844 |
| chr1:2222199-2222569      | chr1  | 2222199   | 2222569   | 0.839107937 | 0.74196347  | 0.097144467  | 4  | 845 |
| chr19:38307879-38308526   | chr19 | 38307879  | 38308526  | 0.844313187 | 0.747616086 | 0.096697101  | 4  | 846 |
| chr6:75794881-75795088    | chr6  | 75794881  | 75795088  | 0.870566028 | 0.766863479 | 0.103702549  | 3  | 847 |
| chr15:29033879-29034710   | chr15 | 29033879  | 29034710  | 0.67595179  | 0.597042235 | 0.078909555  | 7  | 848 |
| chr19:19256552-19256824   | chr19 | 19256552  | 19256824  | 0.588314135 | 0.525662427 | 0.062651708  | 2  | 849 |
| chr19:5338789-5339130     | chr19 | 5338789   | 5339130   | 0.81571133  | 0.728247999 | 0.087463331  | 3  | 850 |
| chr21:15052411-15052644   | chr21 | 15052411  | 15052644  | 0.628214295 | 0.710237694 | -0.082023399 | 1  | 851 |
| chr19:13208344-13210525   | chr19 | 13208344  | 13210525  | 0.863665022 | 0.767191436 | 0.096473586  | 8  | 852 |
| chr1:149149251-149149505  | chr1  | 149149251 | 149149505 | 0.793581688 | 0.705741863 | 0.087839825  | 4  | 853 |
| chr20:37230524-37230742   | chr20 | 37230524  | 37230742  | 0.598803741 | 0.508102251 | 0.09070149   | 2  | 854 |
| chrX:122993548-122994335  | chrX  | 122993548 | 122994335 | 0.467974307 | 0.405446188 | 0.062528119  | 12 | 855 |
| chr1:156893520-156894232  | chr1  | 156893520 | 156894232 | 0.899740541 | 0.796178425 | 0.103562116  | 4  | 856 |
| chr9:35689611-35691101    | chr9  | 35689611  | 35691101  | 0.509648161 | 0.4255528   | 0.084095361  | 3  | 857 |
| chr19:3369478-3369913     | chr19 | 3369478   | 3369913   | 0.81960443  | 0.727532195 | 0.092072235  | 5  | 858 |
| chr21:34392163-34392656   | chr21 | 34392163  | 34392656  | 0.831984928 | 0.735120661 | 0.096864267  | 2  | 859 |
| chr6:5999150-5999787      | chr6  | 5999150   | 5999787   | 0.868687104 | 0.768575552 | 0.100111552  | 4  | 860 |
| chr1:146552329-146552577  | chr1  | 146552329 | 146552577 | 0.893746114 | 0.785417613 | 0.108328501  | 3  | 861 |
| chr2:162283582-162284677  | chr2  | 162283582 | 162284677 | 0.867907783 | 0.74628743  | 0.121620354  | 8  | 862 |
| chr1:196847159-196847418  | chr1  | 196847159 | 196847418 | 0.747665017 | 0.661750004 | 0.085915013  | 1  | 863 |
| chr9:136294739-136295236  | chr9  | 136294739 | 136295236 | 0.832156111 | 0.732730185 | 0.099425926  | 1  | 864 |
| chr11:64739011-64739750   | chr11 | 64739011  | 64739750  | 0.876874317 | 0.776308907 | 0.10056541   | 7  | 865 |
| chr2:25354284-25354777    | chr2  | 25354284  | 25354777  | 0.879011308 | 0.775838356 | 0.103172952  | 3  | 866 |
| chr9:98783217-98784364    | chr9  | 98783217  | 98784364  | 0.826007252 | 0.729977619 | 0.096029633  | 6  | 867 |
| chr3:38040290-38040535    | chr3  | 38040290  | 38040535  | 0.747864654 | 0.662878639 | 0.084986014  | 3  | 868 |
| chr7:2774445-2774655      | chr7  | 2774445   | 2774655   | 0.867148078 | 0.767761046 | 0.099387031  | 3  | 869 |
| chr20:61927195-61927482   | chr20 | 61927195  | 61927482  | 0.912017068 | 0.809582864 | 0.102434204  | 3  | 870 |
| chr10:50817096-50817309   | chr10 | 50817096  | 50817309  | 0.839212625 | 0.739312965 | 0.09989966   | 4  | 871 |
| chr2:220082992-220084012  | chr2  | 220082992 | 220084012 | 0.616853694 | 0.546408573 | 0.070445121  | 10 | 872 |
| chr6:35181096-35182547    | chr6  | 35181096  | 35182547  | 0.743280411 | 0.660636943 | 0.082643467  | 7  | 873 |
| chr9:14349308-14349515    | chr9  | 14349308  | 14349515  | 0.916126788 | 0.796399551 | 0.119727237  | 2  | 874 |
| chr16:5037530-5037797     | chr16 | 5037530   | 5037797   | 0.933320444 | 0.826741079 | 0.106579365  | 1  | 875 |
| chr1:110282352-110283306  | chr1  | 110282352 | 110283306 | 0.615282672 | 0.545688865 | 0.069593807  | 5  | 876 |
| chr5:3594468-3603054      | chr5  | 3594468   | 3603054   | 0.564038769 | 0.485891945 | 0.078146824  | 24 | 877 |
| chr19:3585358-3585947     | chr19 | 3585358   | 3585947   | 0.604325525 | 0.486753777 | 0.117571747  | 3  | 878 |
| chr11:68622723-68623252   | chr11 | 68622723  | 68623252  | 0.690979563 | 0.612635786 | 0.078343777  | 3  | 879 |
| chr8:48649767-48651653    | chr8  | 48649767  | 48651653  | 0.485841708 | 0.424243855 | 0.061597853  | 9  | 880 |
| chr19:42431917-42432376   | chr19 | 42431917  | 42432376  | 0.434498974 | 0.368703165 | 0.065795809  | 2  | 881 |
| chr10:133794407-133794637 | chr10 | 133794407 | 133794637 | 0.881752684 | 0.78281272  | 0.098939963  | 3  | 882 |
| chr12:133135294-133135722 | chr12 | 133135294 | 133135722 | 0.864284976 | 0.766291467 | 0.097993509  | 3  | 883 |
| chr11:33890358-33891495   | chr11 | 33890358  | 33891495  | 0.279350965 | 0.217824906 | 0.061526058  | 7  | 884 |
| chr9:99639590-99640054    | chr9  | 99639590  | 99640054  | 0.89418557  | 0.767414136 | 0.126771434  | 2  | 885 |
| chr7:2558372-2559967      | chr7  | 2558372   | 2559967   | 0.347435969 | 0.285925837 | 0.061510133  | 8  | 886 |
| chr2:237145614-237146576  | chr2  | 237145614 | 237146576 | 0.91942584  | 0.815449276 | 0.103976564  | 3  | 887 |
| chr6:151560767-151560993  | chr6  | 151560767 | 151560993 | 0.89191702  | 0.791712756 | 0.100204263  | 5  | 888 |
| chr1:229542944-229543770  | chr1  | 229542944 | 229543770 | 0.829021669 | 0.740834599 | 0.08818707   | 5  | 889 |
| chr8:124169040-124169449  | chr8  | 124169040 | 124169449 | 0.586185561 | 0.501390021 | 0.08479554   | 3  | 890 |
| chr17:42072139-42072444   | chr17 | 42072139  | 42072444  | 0.375380445 | 0.300997005 | 0.07438344   | 3  | 891 |
| chr2:45028956-45029318    | chr2  | 45028956  | 45029318  | 0.910592476 | 0.774822042 | 0.135770434  | 2  | 892 |
| chr12:132690340-132690571 | chr12 | 132690340 | 132690571 | 0.8980287   | 0.796255839 | 0.101772862  | 3  | 893 |
| chr19:55880578-55880922   | chr19 | 55880578  | 55880922  | 0.148297371 | 0.086920467 | 0.061376904  | 2  | 894 |
| chr19:45908141-45908466   | chr19 | 45908141  | 45908466  | 0.556225652 | 0.488839008 | 0.067386644  | 6  | 895 |
| chr19:5827755-5828405     | chr19 | 5827755   | 5828405   | 0.573150047 | 0.508353617 | 0.06479643   | 4  | 896 |
| chr19:17958491-17958808   | chr19 | 17958491  | 17958808  | 0.906195364 | 0.803652958 | 0.102542405  | 4  | 897 |
| chr5:87955639-87955864    | chr5  | 87955639  | 87955864  | 0.929016548 | 0.823765583 | 0.105250965  | 2  | 898 |
| chr19:12076030-12076366   | chr19 | 12076030  | 12076366  | 0.513903624 | 0.445905614 | 0.067998009  | 4  | 899 |
| chr15:27212903-27213396   | chr15 | 27212903  | 27213396  | 0.899215781 | 0.797390757 | 0.101825024  | 3  | 900 |
| chr19:996075-996679       | chr19 | 996075    | 996679    | 0.329330734 | 0.268225203 | 0.06110553   | 3  | 901 |
| chr20:2731064-2731395     | chr20 | 2731064   | 2731395   | 0.854076    | 0.757283919 | 0.096792081  | 3  | 902 |
| chr2:177005365-177005666  | chr2  | 177005365 | 177005666 | 0.733071697 | 0.623263187 | 0.10980851   | 4  | 903 |
| chr19:36822396-36822690   | chr19 | 36822396  | 36822690  | 0.358417709 | 0.297423835 | 0.060993875  | 4  | 904 |
| chr16:86612189-86613821   | chr16 | 86612189  | 86613821  | 0.912254303 | 0.80927189  | 0.102982413  | 7  | 905 |
| chr1:26490523-26491015    | chr1  | 26490523  | 26491015  | 0.494433495 | 0.420863963 | 0.073569532  | 3  | 906 |
| chr11:31825744-31826967   | chr11 | 31825744  | 31826967  | 0.903068678 | 0.77989063  | 0.123178047  | 6  | 907 |
| chr17:79485600-79486913   | chr17 | 79485600  | 79486913  | 0.74973539  | 0.667139049 | 0.082596341  | 5  | 908 |
| chr5:176558853-176561652  | chr5  | 176558853 | 176561652 | 0.754322314 | 0.691757335 | 0.062564979  | 10 | 909 |

|                           |       |           |           |             |             |              |    |     |
|---------------------------|-------|-----------|-----------|-------------|-------------|--------------|----|-----|
| chr20:3758207-3759184     | chr20 | 3758207   | 3759184   | 0.744930056 | 0.659650674 | 0.085279382  | 4  | 910 |
| chr19:53400461-53401205   | chr19 | 53400461  | 53401205  | 0.73899082  | 0.647201698 | 0.091789122  | 5  | 911 |
| chr7:56515586-56515864    | chr7  | 56515586  | 56515864  | 0.5137097   | 0.584885649 | -0.071175949 | 4  | 912 |
| chr1:201708788-201709429  | chr1  | 201708788 | 201709429 | 0.384708729 | 0.309092598 | 0.075616131  | 7  | 913 |
| chr2:218621280-218621498  | chr2  | 218621280 | 218621498 | 0.281475542 | 0.213779123 | 0.067696419  | 4  | 914 |
| chr17:15847758-15849513   | chr17 | 15847758  | 15849513  | 0.53874019  | 0.453817415 | 0.084922775  | 11 | 915 |
| chr1:21996162-21996409    | chr1  | 21996162  | 21996409  | 0.818227862 | 0.708460678 | 0.109767184  | 4  | 916 |
| chr1:32705525-32707141    | chr1  | 32705525  | 32707141  | 0.818585356 | 0.73077606  | 0.087809296  | 7  | 917 |
| chr5:150325905-150326194  | chr5  | 150325905 | 150326194 | 0.697128956 | 0.629735557 | 0.067393399  | 6  | 918 |
| chr11:59382688-59382929   | chr11 | 59382688  | 59382929  | 0.126975512 | 0.066429968 | 0.060545544  | 3  | 919 |
| chr1:244213398-244213619  | chr1  | 244213398 | 244213619 | 0.312015527 | 0.224774034 | 0.087241492  | 4  | 920 |
| chrX:39942757-39943419    | chrX  | 39942757  | 39943419  | 0.805223492 | 0.708652971 | 0.096570521  | 3  | 921 |
| chrX:152735785-152736193  | chrX  | 152735785 | 152736193 | 0.495580129 | 0.435142088 | 0.060438041  | 4  | 922 |
| chr9:131580591-131581583  | chr9  | 131580591 | 131581583 | 0.257209963 | 0.193336589 | 0.063873375  | 2  | 923 |
| chr2:176989338-176989587  | chr2  | 176989338 | 176989587 | 0.829076699 | 0.738695259 | 0.09038144   | 3  | 924 |
| chr17:60885409-60885857   | chr17 | 60885409  | 60885857  | 0.578262512 | 0.437432631 | 0.140829881  | 4  | 925 |
| chr4:111554966-111555504  | chr4  | 111554966 | 111555504 | 0.917343561 | 0.80528352  | 0.112060042  | 5  | 926 |
| chr4:4866439-4866813      | chr4  | 4866439   | 4866813   | 0.904094251 | 0.80243125  | 0.101663001  | 3  | 927 |
| chr14:37116189-37117628   | chr14 | 37116189  | 37117628  | 0.863218141 | 0.753597036 | 0.109621105  | 7  | 928 |
| chr14:92788914-92789204   | chr14 | 92788914  | 92789204  | 0.65635305  | 0.575863538 | 0.080489512  | 4  | 929 |
| chr3:172167527-172167866  | chr3  | 172167527 | 172167866 | 0.740010044 | 0.640881564 | 0.099128479  | 4  | 930 |
| chr1:236304759-236305025  | chr1  | 236304759 | 236305025 | 0.518051126 | 0.457834469 | 0.060216657  | 4  | 931 |
| chr4:3767073-3769789      | chr4  | 3767073   | 3769789   | 0.520841717 | 0.451699059 | 0.069142659  | 12 | 932 |
| chr16:32126915-32128143   | chr16 | 32126915  | 32128143  | 0.550610559 | 0.490463479 | 0.06014708   | 4  | 933 |
| chr15:55879793-55881228   | chr15 | 55879793  | 55881228  | 0.351813702 | 0.258225457 | 0.093588245  | 11 | 934 |
| chr11:49229718-49230040   | chr11 | 49229718  | 49230040  | 0.695176395 | 0.547605829 | 0.147570566  | 2  | 935 |
| chr17:74235759-74237211   | chr17 | 74235759  | 74237211  | 0.415143846 | 0.355020409 | 0.060123436  | 6  | 936 |
| chr9:132312157-132312892  | chr9  | 132312157 | 132312892 | 0.825067415 | 0.73235793  | 0.092709485  | 1  | 937 |
| chr19:15833734-15833983   | chr19 | 15833734  | 15833983  | 0.744510894 | 0.673454307 | 0.071056587  | 3  | 938 |
| chrX:71524833-71527299    | chrX  | 71524833  | 71527299  | 0.53274666  | 0.472632663 | 0.060113997  | 22 | 939 |
| chr10:27547669-27548402   | chr10 | 27547669  | 27548402  | 0.901696079 | 0.800955077 | 0.100741002  | 4  | 940 |
| chr2:241507464-241507669  | chr2  | 241507464 | 241507669 | 0.139821608 | 0.079724299 | 0.060097309  | 2  | 941 |
| chr14:104690040-104690274 | chr14 | 104690040 | 104690274 | 0.887983318 | 0.790258481 | 0.097724837  | 5  | 942 |
| chr12:96252021-96252246   | chr12 | 96252021  | 96252246  | 0.901788708 | 0.798624708 | 0.103164     | 4  | 943 |
| chr19:48945801-48947636   | chr19 | 48945801  | 48947636  | 0.871125264 | 0.779174405 | 0.091950859  | 6  | 944 |
| chr10:44806146-44806729   | chr10 | 44806146  | 44806729  | 0.787209652 | 0.700305928 | 0.086903724  | 3  | 945 |
| chr12:3982247-3982708     | chr12 | 3982247   | 3982708   | 0.243639438 | 0.183579636 | 0.060059803  | 2  | 946 |
| chr19:21769190-21769786   | chr19 | 21769190  | 21769786  | 0.501724251 | 0.419505953 | 0.082218298  | 4  | 947 |
| chr22:19742902-19744729   | chr22 | 19742902  | 19744729  | 0.712285773 | 0.628222613 | 0.08406316   | 11 | 948 |
| chr11:396686-397462       | chr11 | 396686    | 397462    | 0.907974535 | 0.80801087  | 0.099963666  | 3  | 949 |
| chr7:1286023-1287658      | chr7  | 1286023   | 1287658   | 0.846307785 | 0.751968969 | 0.094338817  | 10 | 950 |
| chr7:1283840-1284040      | chr7  | 1283840   | 1284040   | 0.916184223 | 0.81375418  | 0.102430044  | 3  | 951 |
| chr16:711066-711414       | chr16 | 711066    | 711414    | 0.622275739 | 0.562419925 | 0.059855813  | 2  | 952 |
| chr19:3868587-3869217     | chr19 | 3868587   | 3869217   | 0.900230727 | 0.799779612 | 0.100451115  | 6  | 953 |
| chr7:27244531-27245297    | chr7  | 27244531  | 27245297  | 0.916462356 | 0.787962455 | 0.128499902  | 3  | 954 |
| chr14:57278069-57278287   | chr14 | 57278069  | 57278287  | 0.931526488 | 0.827368044 | 0.104158444  | 2  | 955 |
| chr11:120110498-120110719 | chr11 | 120110498 | 120110719 | 0.860747424 | 0.764302405 | 0.09644502   | 4  | 956 |
| chr4:8929991-89300429     | chr4  | 8929991   | 89300429  | 0.18804828  | 0.128422944 | 0.059625336  | 3  | 957 |
| chr5:178421226-178422337  | chr5  | 178421226 | 178422337 | 0.870410886 | 0.773305714 | 0.097105171  | 7  | 958 |
| chr15:31689501-31689707   | chr15 | 31689501  | 31689707  | 0.639646256 | 0.569514156 | 0.0701321    | 3  | 959 |
| chr2:45164562-45166567    | chr2  | 45164562  | 45166567  | 0.8356497   | 0.742055516 | 0.093594184  | 10 | 960 |
| chr12:54343623-54343848   | chr12 | 54343623  | 54343848  | 0.895513442 | 0.795592872 | 0.09992057   | 4  | 961 |
| chr5:79330929-79331488    | chr5  | 79330929  | 79331488  | 0.851682918 | 0.764209317 | 0.087473601  | 6  | 962 |
| chr17:58216794-58217515   | chr17 | 58216794  | 58217515  | 0.899043747 | 0.79886995  | 0.100173797  | 3  | 963 |
| chr4:17513310-17513981    | chr4  | 17513310  | 17513981  | 0.233375476 | 0.173928915 | 0.059446561  | 7  | 964 |
| chr13:76209541-76211213   | chr13 | 76209541  | 76211213  | 0.575541268 | 0.51610216  | 0.059439108  | 4  | 965 |
| chr16:85394177-85394378   | chr16 | 85394177  | 85394378  | 0.769001433 | 0.683454357 | 0.085547076  | 2  | 966 |
| chr19:41115446-41115767   | chr19 | 41115446  | 41115767  | 0.480026902 | 0.420621888 | 0.059405013  | 3  | 967 |
| chr1:18964181-18964401    | chr1  | 18964181  | 18964401  | 0.831796754 | 0.73949875  | 0.092298004  | 2  | 968 |
| chr7:39015544-39015929    | chr7  | 39015544  | 39015929  | 0.90956586  | 0.808455137 | 0.101110723  | 3  | 969 |
| chr7:153445165-153446786  | chr7  | 153445165 | 153446786 | 0.747937725 | 0.666242784 | 0.081694941  | 4  | 970 |
| chr12:14927292-14928023   | chr12 | 14927292  | 14928023  | 0.808862094 | 0.719396583 | 0.089465511  | 6  | 971 |
| chr4:57371583-57372022    | chr4  | 57371583  | 57372022  | 0.883792479 | 0.775710984 | 0.108081495  | 5  | 972 |
| chr3:62304515-62304780    | chr3  | 62304515  | 62304780  | 0.433702421 | 0.374457175 | 0.059245246  | 4  | 973 |
| chr1:29101791-29102069    | chr1  | 29101791  | 29102069  | 0.895982076 | 0.797928905 | 0.098053171  | 4  | 974 |
| chrX:64754317-64754805    | chrX  | 64754317  | 64754805  | 0.578125233 | 0.515996613 | 0.06212862   | 6  | 975 |
| chr17:79894669-79895533   | chr17 | 79894669  | 79895533  | 0.67011177  | 0.595501945 | 0.074609825  | 11 | 976 |
| chr19:18527652-18531118   | chr19 | 18527652  | 18531118  | 0.348304228 | 0.289124154 | 0.059180074  | 8  | 977 |
| chr11:65547500-65549261   | chr11 | 65547500  | 65549261  | 0.643767173 | 0.570691107 | 0.073076066  | 8  | 978 |
| chr17:14200580-14200996   | chr17 | 14200580  | 14200996  | 0.519792026 | 0.387469684 | 0.132322342  | 2  | 979 |
| chr17:1627746-1629897     | chr17 | 1627746   | 1629897   | 0.71118606  | 0.652090211 | 0.059095849  | 10 | 980 |
| chr1:149399899-149400518  | chr1  | 149399899 | 149400518 | 0.549515737 | 0.489559109 | 0.059956629  | 5  | 981 |
| chr2:101033607-101034296  | chr2  | 101033607 | 101034296 | 0.27278451  | 0.213803402 | 0.058981108  | 4  | 982 |
| chr8:143645073-143645673  | chr8  | 143645073 | 143645673 | 0.370994149 | 0.465721503 | -0.094727354 | 4  | 983 |
| chr1:150254366-150254637  | chr1  | 150254366 | 150254637 | 0.482891018 | 0.423961837 | 0.058929181  | 4  | 984 |
| chr1:235805319-235805771  | chr1  | 235805319 | 235805771 | 0.894366159 | 0.798658469 | 0.09570769   | 4  | 985 |

|                         |       |          |          |             |             |             |    |      |
|-------------------------|-------|----------|----------|-------------|-------------|-------------|----|------|
| chr5:88185225-88185589  | chr5  | 88185225 | 88185589 | 0.81064117  | 0.688997899 | 0.121643271 | 1  | 986  |
| chr9:96720587-96723189  | chr9  | 96720587 | 96723189 | 0.894837723 | 0.793669296 | 0.101168427 | 9  | 987  |
| chr14:75517718-75518224 | chr14 | 75517718 | 75518224 | 0.177893091 | 0.118999467 | 0.058893623 | 4  | 988  |
| chr6:5851611-5851841    | chr6  | 5851611  | 5851841  | 0.809438117 | 0.720899752 | 0.088538365 | 3  | 989  |
| chr10:25241111-25241900 | chr10 | 25241111 | 25241900 | 0.570334146 | 0.503325923 | 0.067008223 | 5  | 990  |
| chr11:63974830-63975048 | chr11 | 63974830 | 63975048 | 0.843091992 | 0.745046476 | 0.098045516 | 3  | 991  |
| chr1:40782221-40783145  | chr1  | 40782221 | 40783145 | 0.735749719 | 0.654399644 | 0.081350075 | 8  | 992  |
| chr17:42287693-42288392 | chr17 | 42287693 | 42288392 | 0.805370579 | 0.716846246 | 0.088524333 | 3  | 993  |
| chr22:17090456-17091224 | chr22 | 17090456 | 17091224 | 0.533148167 | 0.443214311 | 0.089933857 | 4  | 994  |
| chrX:9982514-9984583    | chrX  | 9982514  | 9984583  | 0.894679507 | 0.79791709  | 0.096762417 | 5  | 995  |
| chrX:77150838-77151247  | chrX  | 77150838 | 77151247 | 0.488683426 | 0.430075437 | 0.058607989 | 10 | 996  |
| chr12:28127891-28128575 | chr12 | 28127891 | 28128575 | 0.697912807 | 0.616237878 | 0.081674929 | 3  | 997  |
| chr7:49813009-49815752  | chr7  | 49813009 | 49815752 | 0.612359255 | 0.503986122 | 0.108373133 | 17 | 998  |
| chr4:41883493-41884570  | chr4  | 41883493 | 41884570 | 0.826745738 | 0.699623275 | 0.127122463 | 6  | 999  |
| chr17:75447478-75447821 | chr17 | 75447478 | 75447821 | 0.69971052  | 0.623413172 | 0.076297347 | 4  | 1000 |

**Supplementary Table S7. List of the 500 top-ranked, gene symbol-associated differentially methylated promoters after induced overexpression of *TET1* .**

| gene_symbol | beta.TET1+Dox | beta.TET1-Dox | difference   | num.sites | rank |
|-------------|---------------|---------------|--------------|-----------|------|
| IFI44       | 0.190210932   | 0.409157366   | -0.218946433 | 1         | 1    |
| TRGV3       | 0.155041443   | 0.367268093   | -0.21222665  | 2         | 2    |
| PRC1        | 0.212478088   | 0.36766959    | -0.155191503 | 1         | 3    |
| ZNF726      | 0.141953305   | 0.327020175   | -0.18506687  | 1         | 4    |
| CLEC5A      | 0.332514009   | 0.526198143   | -0.193684134 | 1         | 5    |
| GLIS2       | 0.136088356   | 0.28710581    | -0.151017454 | 4         | 6    |
| PRKRIRP7    | 0.339430918   | 0.145788105   | 0.193642813  | 1         | 7    |
| KRTAP19-6   | 0.335823175   | 0.488154289   | -0.152331113 | 2         | 8    |
| RNA5SP42    | 0.391115907   | 0.588939481   | -0.197823575 | 1         | 9    |
| SPRR2G      | 0.148150654   | 0.336810049   | -0.188659395 | 2         | 10   |
| TRGV10      | 0.331477967   | 0.487728367   | -0.1562504   | 1         | 11   |
| TRBVB       | 0.502936609   | 0.329692569   | 0.17324404   | 1         | 12   |
| LINC00504   | 0.320456569   | 0.467990765   | -0.147534196 | 1         | 13   |
| MIR550A1    | 0.287333918   | 0.424083114   | -0.136749196 | 1         | 14   |
| PMCHL1      | 0.471654419   | 0.638563701   | -0.166909282 | 2         | 15   |
| MIR320D2    | 0.217399129   | 0.348950725   | -0.131551596 | 3         | 16   |
| ZNF510      | 0.096527523   | 0.220102259   | -0.123574736 | 4         | 17   |
| MIR509-2    | 0.128498339   | 0.25125834    | -0.122760001 | 1         | 18   |
| C1orf68     | 0.329523184   | 0.48564099    | -0.156117807 | 2         | 19   |
| GFRAL       | 0.515688989   | 0.680968349   | -0.165279361 | 2         | 20   |
| CASP5       | 0.344211792   | 0.496909229   | -0.152697437 | 2         | 21   |
| TSPY13P     | 0.396539801   | 0.281606303   | 0.114933498  | 1         | 22   |
| BBS2        | 0.213021516   | 0.332673888   | -0.119652371 | 7         | 23   |
| OR7G1       | 0.536857222   | 0.741637839   | -0.204780617 | 1         | 24   |
| RPA3        | 0.532911849   | 0.388233086   | 0.144678762  | 1         | 25   |
| NUDT21      | 0.169161709   | 0.275703275   | -0.106541566 | 3         | 26   |
| SLC9A7P1    | 0.131880689   | 0.245959396   | -0.114078707 | 5         | 27   |
| UBQLN4P2    | 0.305332155   | 0.533824311   | -0.228492156 | 1         | 28   |
| SUB1        | 0.485288944   | 0.657497376   | -0.172208432 | 1         | 29   |
| TMEM114     | 0.457937341   | 0.581749361   | -0.12381202  | 4         | 30   |
| SNCAIP      | 0.469767788   | 0.571696277   | -0.101928489 | 5         | 31   |
| NPNT        | 0.163756406   | 0.294740012   | -0.130983605 | 3         | 32   |
| TLL11-IT1   | 0.274095062   | 0.475529329   | -0.201434266 | 1         | 33   |
| RNU6-173P   | 0.297431615   | 0.412957275   | -0.11552566  | 1         | 34   |
| KLHL3       | 0.573589662   | 0.674707154   | -0.101117492 | 6         | 35   |
| LZTR1       | 0.63685967    | 0.524073375   | 0.112786296  | 2         | 36   |
| TXNDC9      | 0.151712672   | 0.347951342   | -0.19623867  | 1         | 37   |
| B3GALT1     | 0.471104625   | 0.661815844   | -0.190711219 | 5         | 38   |
| UGT2B10     | 0.216353361   | 0.373730151   | -0.15737679  | 1         | 39   |
| HNRNPDP2    | 0.56156639    | 0.756302233   | -0.194735843 | 1         | 40   |
| FHL5        | 0.432453672   | 0.53066199    | -0.098208318 | 4         | 41   |
| CAMK1G      | 0.480512586   | 0.619588523   | -0.139075937 | 3         | 42   |
| CDH18       | 0.269086826   | 0.36588223    | -0.096795403 | 1         | 43   |
| MIR100      | 0.359345118   | 0.562352862   | -0.203007743 | 2         | 44   |
| RNU6-502P   | 0.366474216   | 0.246830172   | 0.119644045  | 3         | 45   |
| IGHV1OR15-1 | 0.474835213   | 0.626281196   | -0.151445983 | 1         | 46   |

|             |             |             |              |    |    |
|-------------|-------------|-------------|--------------|----|----|
| RNU6-698P   | 0.480655679 | 0.303703464 | 0.176952215  | 1  | 47 |
| SNORD58C    | 0.407991238 | 0.537533859 | -0.12954262  | 4  | 48 |
| OR6C6       | 0.279596516 | 0.459161158 | -0.179564642 | 1  | 49 |
| KRTAP6-2    | 0.336285428 | 0.442847064 | -0.106561636 | 5  | 50 |
| TNFSF11     | 0.368692218 | 0.519482974 | -0.150790756 | 3  | 51 |
| SNORD115-25 | 0.275049149 | 0.384284904 | -0.109235755 | 4  | 52 |
| ALDOC       | 0.38594715  | 0.483622594 | -0.097675444 | 11 | 53 |
| GIMAP4      | 0.384214325 | 0.512232689 | -0.128018364 | 6  | 54 |
| CYP4F22     | 0.511350166 | 0.600366895 | -0.089016729 | 7  | 55 |
| RNU6-275P   | 0.555654188 | 0.715863427 | -0.16020924  | 1  | 56 |
| CARD6       | 0.178236875 | 0.269541553 | -0.091304678 | 5  | 57 |
| NRBP1       | 0.362882049 | 0.222314341 | 0.140567708  | 2  | 58 |
| GUCY2C      | 0.527747665 | 0.627481811 | -0.099734147 | 4  | 59 |
| LINC00968   | 0.226120527 | 0.310657409 | -0.084536882 | 2  | 60 |
| SMARCD3     | 0.411091042 | 0.31552861  | 0.095562432  | 1  | 61 |
| OR1E2       | 0.328927903 | 0.41279812  | -0.083870217 | 6  | 62 |
| NBPF22P     | 0.591395224 | 0.746016801 | -0.154621576 | 2  | 63 |
| LINC00488   | 0.595310732 | 0.757763635 | -0.162452904 | 3  | 64 |
| BCMO1       | 0.23445121  | 0.322102145 | -0.087650935 | 5  | 65 |
| OR52E6      | 0.484743546 | 0.787624802 | -0.302881256 | 1  | 66 |
| ST6GALNAC2  | 0.399030109 | 0.509828026 | -0.110797917 | 2  | 67 |
| LHFPL3-AS1  | 0.534945616 | 0.6784219   | -0.143476284 | 4  | 68 |
| NAV2-IT1    | 0.647664357 | 0.814213954 | -0.166549597 | 1  | 69 |
| PF4V1       | 0.423134404 | 0.571165595 | -0.148031191 | 6  | 70 |
| LY6H        | 0.470070525 | 0.382065371 | 0.088005154  | 7  | 71 |
| RNU6-1309P  | 0.272085197 | 0.364069083 | -0.091983886 | 1  | 72 |
| MAPK15      | 0.522963163 | 0.600589664 | -0.077626502 | 14 | 73 |
| LCE4A       | 0.397084391 | 0.494880264 | -0.097795873 | 2  | 74 |
| OR52K2      | 0.295143496 | 0.411961143 | -0.116817647 | 3  | 75 |
| OR4N5       | 0.431979611 | 0.609457279 | -0.177477667 | 3  | 76 |
| RNA5SP107   | 0.301175913 | 0.553285895 | -0.252109982 | 1  | 77 |
| SPANXA1     | 0.377170654 | 0.604684169 | -0.227513514 | 1  | 78 |
| MIR526A1    | 0.164730672 | 0.265655612 | -0.10092494  | 4  | 79 |
| RAB39B      | 0.478239724 | 0.563470944 | -0.08523122  | 5  | 80 |
| KIAA0947    | 0.642408992 | 0.728985494 | -0.086576503 | 2  | 81 |
| RPSAP52     | 0.397475453 | 0.494113445 | -0.096637992 | 3  | 82 |
| HSD11B2     | 0.233430853 | 0.160971697 | 0.072459156  | 8  | 83 |
| KRTAP10-8   | 0.526353136 | 0.610052923 | -0.083699786 | 4  | 84 |
| SCNM1       | 0.596380946 | 0.668133561 | -0.071752616 | 6  | 85 |
| TNFAIP8L2   | 0.596380946 | 0.668133561 | -0.071752616 | 6  | 86 |
| TRIML1      | 0.38867281  | 0.494914802 | -0.106241992 | 6  | 87 |
| CNN3P1      | 0.54740114  | 0.621201095 | -0.073799954 | 2  | 88 |
| FAM27E2     | 0.586671306 | 0.47688265  | 0.109788656  | 1  | 89 |
| HBG2        | 0.534077221 | 0.330402253 | 0.203674969  | 2  | 90 |
| MAGEB3      | 0.344510353 | 0.476251332 | -0.131740979 | 5  | 91 |
| OR2L3       | 0.30883153  | 0.47607148  | -0.16723995  | 1  | 92 |
| RNU6-835P   | 0.434682969 | 0.636897619 | -0.20221465  | 1  | 93 |
| PRAMEF11    | 0.317562739 | 0.391446633 | -0.073883894 | 2  | 94 |
| SNORD87     | 0.561956039 | 0.662640791 | -0.100684752 | 5  | 95 |
| CRYAB       | 0.525569409 | 0.643700683 | -0.118131274 | 1  | 96 |

|             |             |             |              |    |     |
|-------------|-------------|-------------|--------------|----|-----|
| TJAP1       | 0.098272765 | 0.16791979  | -0.069647025 | 4  | 97  |
| LAYN        | 0.561955928 | 0.631484298 | -0.06952837  | 10 | 98  |
| MTND1P28    | 0.449262381 | 0.560858029 | -0.111595648 | 1  | 99  |
| MIR550A3    | 0.424072643 | 0.539143825 | -0.115071182 | 1  | 100 |
| OLFML2A     | 0.574841387 | 0.493986622 | 0.080854765  | 3  | 101 |
| S100A7L2    | 0.351121089 | 0.419650669 | -0.06852958  | 2  | 102 |
| KRT38       | 0.529833647 | 0.631351503 | -0.101517856 | 5  | 103 |
| OR1J4       | 0.116809372 | 0.197422216 | -0.080612844 | 1  | 104 |
| BZW1        | 0.411285719 | 0.501285554 | -0.089999834 | 1  | 105 |
| OR2W1       | 0.51956738  | 0.606199244 | -0.086631863 | 4  | 106 |
| SNX2P2      | 0.19160047  | 0.37951284  | -0.18791237  | 1  | 107 |
| TRIML2      | 0.21059265  | 0.362910086 | -0.152317436 | 1  | 108 |
| STAC2       | 0.372307758 | 0.439943887 | -0.06763613  | 10 | 109 |
| DLGAP2      | 0.57100093  | 0.674274685 | -0.103273755 | 11 | 110 |
| GLIS1       | 0.560007379 | 0.654659916 | -0.094652537 | 6  | 111 |
| CCL2        | 0.517518218 | 0.584865139 | -0.067346921 | 9  | 112 |
| SNORD115-41 | 0.497072971 | 0.584169963 | -0.087096992 | 6  | 113 |
| MIR514A1    | 0.739708236 | 0.896984396 | -0.15727616  | 1  | 114 |
| TRIM77      | 0.582454464 | 0.694532002 | -0.112077538 | 2  | 115 |
| NTF6A       | 0.633939102 | 0.52279486  | 0.111144241  | 1  | 116 |
| RGS6        | 0.201144765 | 0.123447644 | 0.077697121  | 5  | 117 |
| MID2        | 0.425783003 | 0.501172508 | -0.075389505 | 7  | 118 |
| KRTAP19-3   | 0.472173592 | 0.574395157 | -0.102221565 | 4  | 119 |
| PSMA2P2     | 0.669153193 | 0.809669149 | -0.140515957 | 1  | 120 |
| RXRG        | 0.38700662  | 0.469583711 | -0.082577091 | 13 | 121 |
| IL7R        | 0.396545246 | 0.611473914 | -0.214928669 | 1  | 122 |
| COX6B2      | 0.381588895 | 0.450391158 | -0.068802263 | 13 | 123 |
| POU6F2-AS2  | 0.771956951 | 0.594183307 | 0.177773644  | 1  | 124 |
| ENOSF1      | 0.37310646  | 0.437333395 | -0.064226936 | 7  | 125 |
| IGHV3-21    | 0.321339923 | 0.488395218 | -0.167055295 | 1  | 126 |
| PRSS58      | 0.658132872 | 0.791294098 | -0.133161226 | 1  | 127 |
| ACTL6B      | 0.532172313 | 0.595977399 | -0.063805086 | 8  | 128 |
| SDR16C6P    | 0.32265367  | 0.462957688 | -0.140304018 | 4  | 129 |
| ARHGAP40    | 0.388537505 | 0.461640204 | -0.073102699 | 9  | 130 |
| ALDH1L1-AS2 | 0.114298562 | 0.177956109 | -0.063657547 | 7  | 131 |
| RN7SL805P   | 0.39323438  | 0.476962616 | -0.083728237 | 1  | 132 |
| LPCAT2      | 0.43626969  | 0.499875416 | -0.063605726 | 9  | 133 |
| KRTAP23-1   | 0.318169033 | 0.385543908 | -0.067374874 | 3  | 134 |
| C1orf172    | 0.530252016 | 0.593764694 | -0.063512678 | 10 | 135 |
| GIMAP2      | 0.494302348 | 0.583772445 | -0.089470098 | 2  | 136 |
| MROH9       | 0.606929122 | 0.729308445 | -0.122379323 | 1  | 137 |
| C4orf26     | 0.695820291 | 0.791414858 | -0.095594566 | 6  | 138 |
| OR1A1       | 0.369884524 | 0.469793677 | -0.099909154 | 5  | 139 |
| FAM120C     | 0.444878669 | 0.533663667 | -0.088784998 | 8  | 140 |
| ESM1        | 0.696307032 | 0.596487744 | 0.099819288  | 2  | 141 |
| GZMK        | 0.696307032 | 0.596487744 | 0.099819288  | 2  | 142 |
| OR11H12     | 0.236788232 | 0.299572596 | -0.062784364 | 1  | 143 |
| OR4K5       | 0.365631083 | 0.444603992 | -0.07897291  | 2  | 144 |
| LINC00442   | 0.561441974 | 0.647638732 | -0.086196758 | 2  | 145 |
| CACNA1A     | 0.686744069 | 0.768971884 | -0.082227814 | 3  | 146 |

|             |             |             |              |    |     |
|-------------|-------------|-------------|--------------|----|-----|
| SYCP2       | 0.51725544  | 0.578784299 | -0.061528859 | 7  | 147 |
| LRAT        | 0.538414712 | 0.599761928 | -0.061347216 | 8  | 148 |
| KIR2DL3     | 0.439492439 | 0.511319747 | -0.071827307 | 5  | 149 |
| SNTN        | 0.710474923 | 0.817284063 | -0.10680914  | 4  | 150 |
| HEMGN       | 0.648951115 | 0.773909001 | -0.124957885 | 1  | 151 |
| PGM5P2      | 0.527603808 | 0.625501695 | -0.097897887 | 2  | 152 |
| SNORD115-19 | 0.374580346 | 0.470931523 | -0.096351176 | 9  | 153 |
| CLK4        | 0.299650968 | 0.224587279 | 0.075063689  | 1  | 154 |
| ACPL2       | 0.698353668 | 0.831102413 | -0.132748744 | 1  | 155 |
| FAM131B     | 0.479457892 | 0.539345983 | -0.059888091 | 6  | 156 |
| GGCT        | 0.468707162 | 0.558132768 | -0.089425606 | 1  | 157 |
| CCIN        | 0.73420641  | 0.84019418  | -0.10598777  | 2  | 158 |
| LINC00152   | 0.090986619 | 0.149973451 | -0.058986831 | 1  | 159 |
| SIN3B       | 0.104315301 | 0.167682949 | -0.063367648 | 4  | 160 |
| OR6B1       | 0.478277757 | 0.541852251 | -0.063574493 | 6  | 161 |
| RPS26P49    | 0.300035372 | 0.192829986 | 0.107205386  | 1  | 162 |
| SCG2        | 0.158936307 | 0.234421385 | -0.075485077 | 4  | 163 |
| CC2D2A      | 0.307482056 | 0.386375768 | -0.078893712 | 6  | 164 |
| MYD88       | 0.367254643 | 0.453860153 | -0.086605511 | 14 | 165 |
| RN7SKP54    | 0.193211559 | 0.312862128 | -0.119650569 | 1  | 166 |
| ARMCX2      | 0.557731594 | 0.615563041 | -0.057831447 | 10 | 167 |
| SNORD115-36 | 0.217189478 | 0.336824622 | -0.119635144 | 6  | 168 |
| RETNLB      | 0.498784852 | 0.577811597 | -0.079026746 | 6  | 169 |
| OXCT1-AS1   | 0.348685933 | 0.429851088 | -0.081165155 | 4  | 170 |
| MAPK3       | 0.224722753 | 0.282391534 | -0.057668781 | 6  | 171 |
| TMEM31      | 0.584487021 | 0.667176434 | -0.082689412 | 2  | 172 |
| SNORD93     | 0.518907631 | 0.576423    | -0.057515369 | 5  | 173 |
| RASSF10     | 0.541423792 | 0.647643909 | -0.106220117 | 11 | 174 |
| MPZL2       | 0.259888659 | 0.317055753 | -0.057167094 | 11 | 175 |
| SNORD115-44 | 0.239841659 | 0.317842466 | -0.078000807 | 3  | 176 |
| ALDH1L2     | 0.64340531  | 0.728004041 | -0.084598731 | 11 | 177 |
| SERPINA6    | 0.620981829 | 0.719315361 | -0.098333532 | 5  | 178 |
| IDO2        | 0.361175552 | 0.426137822 | -0.06496227  | 4  | 179 |
| PATE3       | 0.332331022 | 0.426877376 | -0.094546355 | 5  | 180 |
| CIRH1A      | 0.546355042 | 0.644709125 | -0.098354082 | 1  | 181 |
| LDB2        | 0.382025856 | 0.469240415 | -0.087214559 | 5  | 182 |
| LCE6A       | 0.345066455 | 0.424753912 | -0.079687457 | 7  | 183 |
| MTND1P4     | 0.155132398 | 0.230511268 | -0.07537887  | 1  | 184 |
| SNORD109A   | 0.451932416 | 0.377178802 | 0.074753614  | 3  | 185 |
| CYB5AP5     | 0.297339023 | 0.428474543 | -0.131135521 | 1  | 186 |
| BCKDHA      | 0.398388059 | 0.454334366 | -0.055946307 | 2  | 187 |
| TMEM91      | 0.398388059 | 0.454334366 | -0.055946307 | 2  | 188 |
| KRTAP19-1   | 0.234555907 | 0.31766796  | -0.083112054 | 2  | 189 |
| HERC3       | 0.848015819 | 0.732757    | 0.115258819  | 2  | 190 |
| ADH7        | 0.275630772 | 0.476977231 | -0.201346459 | 2  | 191 |
| CREB3L3     | 0.380620681 | 0.450885244 | -0.070264563 | 7  | 192 |
| ELP3        | 0.862795063 | 0.733560987 | 0.129234076  | 1  | 193 |
| SMIM20      | 0.121255356 | 0.176853773 | -0.055598417 | 1  | 194 |
| CREB5       | 0.487486998 | 0.550131926 | -0.062644928 | 6  | 195 |
| TRPV6       | 0.563999375 | 0.654997344 | -0.090997969 | 6  | 196 |

|             |             |             |              |    |     |
|-------------|-------------|-------------|--------------|----|-----|
| LINC00922   | 0.278601913 | 0.391365621 | -0.112763708 | 3  | 197 |
| EEF1G       | 0.455468399 | 0.525494553 | -0.070026154 | 5  | 198 |
| CDA         | 0.565380711 | 0.659538893 | -0.094158182 | 4  | 199 |
| RN7SKP78    | 0.538118805 | 0.632576045 | -0.09445724  | 1  | 200 |
| OR1E1       | 0.109574644 | 0.164699192 | -0.055124548 | 2  | 201 |
| SPTBN1      | 0.122203665 | 0.177279257 | -0.055075593 | 10 | 202 |
| DOK7        | 0.471055401 | 0.548305757 | -0.077250356 | 11 | 203 |
| MX1         | 0.421464493 | 0.493044114 | -0.071579621 | 8  | 204 |
| SNORD115-40 | 0.256848449 | 0.358167395 | -0.101318946 | 6  | 205 |
| MYADM       | 0.542498667 | 0.59733302  | -0.054834354 | 11 | 206 |
| RERG        | 0.725548271 | 0.850688987 | -0.125140716 | 1  | 207 |
| TMEM151A    | 0.363077204 | 0.417892711 | -0.054815506 | 7  | 208 |
| MIR301A     | 0.453667949 | 0.514855719 | -0.06118777  | 4  | 209 |
| CCK         | 0.70524136  | 0.768785288 | -0.063543928 | 4  | 210 |
| INPP1       | 0.620170888 | 0.696936298 | -0.076765409 | 8  | 211 |
| GNAO1       | 0.129344631 | 0.201925312 | -0.072580681 | 9  | 212 |
| FAM84A      | 0.458735639 | 0.390440343 | 0.068295295  | 9  | 213 |
| RAB3IP      | 0.277869549 | 0.331965929 | -0.05409638  | 5  | 214 |
| ZFH3        | 0.263440585 | 0.324009146 | -0.060568561 | 2  | 215 |
| ACTBL2      | 0.754172834 | 0.659901514 | 0.09427132   | 3  | 216 |
| MIR720      | 0.654922097 | 0.741405866 | -0.086483769 | 3  | 217 |
| MORF4L2     | 0.433627443 | 0.502277229 | -0.068649786 | 3  | 218 |
| KRT18P42    | 0.661753511 | 0.774130354 | -0.112376843 | 1  | 219 |
| GPR22       | 0.656727872 | 0.780296505 | -0.123568633 | 1  | 220 |
| SERPINA12   | 0.670929013 | 0.759312621 | -0.088383608 | 5  | 221 |
| RNU6-871P   | 0.291973039 | 0.345505494 | -0.053532455 | 1  | 222 |
| ASAP1       | 0.181190958 | 0.234711813 | -0.053520854 | 3  | 223 |
| MIR147A     | 0.314952359 | 0.465040388 | -0.150088029 | 2  | 224 |
| OR1S2       | 0.417016468 | 0.533060398 | -0.11604393  | 3  | 225 |
| GPX1P2      | 0.424179201 | 0.506073885 | -0.081894684 | 3  | 226 |
| SEPT10P1    | 0.483497753 | 0.634491479 | -0.150993726 | 1  | 227 |
| MLF1        | 0.221468722 | 0.168453094 | 0.053015627  | 12 | 228 |
| KNG1        | 0.713800356 | 0.652376227 | 0.061424129  | 3  | 229 |
| HIATL1      | 0.126050476 | 0.214182462 | -0.088131986 | 3  | 230 |
| KCNK3       | 0.353196969 | 0.42100341  | -0.067806441 | 5  | 231 |
| SNORD115-18 | 0.297636202 | 0.402758196 | -0.105121994 | 6  | 232 |
| TINAG       | 0.71859986  | 0.618917294 | 0.099682567  | 3  | 233 |
| SNORD115-43 | 0.349936315 | 0.426304896 | -0.076368581 | 5  | 234 |
| GPX8        | 0.295801104 | 0.348349919 | -0.052548815 | 5  | 235 |
| SYTL1       | 0.401682955 | 0.454068452 | -0.052385497 | 8  | 236 |
| COX20P2     | 0.142533866 | 0.218190525 | -0.075656658 | 2  | 237 |
| OR5P3       | 0.627863584 | 0.704830651 | -0.076967067 | 4  | 238 |
| ZNF208      | 0.341895693 | 0.41019319  | -0.068297498 | 7  | 239 |
| PRAMEF12    | 0.58766173  | 0.667948341 | -0.08028661  | 3  | 240 |
| FAM225A     | 0.276173231 | 0.396963082 | -0.120789851 | 2  | 241 |
| FAM225B     | 0.276173231 | 0.396963082 | -0.120789851 | 2  | 242 |
| DUXAP3      | 0.177435547 | 0.229472795 | -0.052037248 | 1  | 243 |
| OR52I2      | 0.565269403 | 0.618890237 | -0.053620835 | 3  | 244 |
| SLAMF6      | 0.339901823 | 0.410275279 | -0.070373456 | 2  | 245 |
| POU5F1P6    | 0.63566149  | 0.739191406 | -0.103529916 | 1  | 246 |



|                     |             |             |              |    |     |
|---------------------|-------------|-------------|--------------|----|-----|
| PSMD2               | 0.078716033 | 0.130606806 | -0.051890773 | 5  | 247 |
| CLK2                | 0.364268005 | 0.421237979 | -0.056969973 | 2  | 248 |
| SNORD16             | 0.478243712 | 0.55105549  | -0.072811778 | 6  | 249 |
| LPAL2               | 0.149021982 | 0.268396538 | -0.119374557 | 2  | 250 |
| MS4A6A              | 0.351054254 | 0.475774906 | -0.124720652 | 4  | 251 |
| DEFB133             | 0.356318778 | 0.430890827 | -0.074572048 | 6  | 252 |
| DISC1FP1            | 0.765695246 | 0.660623534 | 0.105071713  | 1  | 253 |
| BTLA                | 0.805509707 | 0.706624081 | 0.098885626  | 3  | 254 |
| C4orf50             | 0.811258733 | 0.700638669 | 0.110620065  | 1  | 255 |
| MMP24               | 0.641425436 | 0.528285375 | 0.113140062  | 2  | 256 |
| ERI1                | 0.827534763 | 0.73636696  | 0.091167803  | 4  | 257 |
| UGT3A1              | 0.510870244 | 0.590731031 | -0.079860787 | 3  | 258 |
| HNRNPCL1            | 0.569883056 | 0.627057451 | -0.057174395 | 5  | 259 |
| OXCT1               | 0.437022727 | 0.50771127  | -0.070688543 | 11 | 260 |
| TMEM202             | 0.624312997 | 0.677328549 | -0.053015553 | 2  | 261 |
| DUSP26              | 0.528877195 | 0.595269906 | -0.066392711 | 9  | 262 |
| RN7SL718P           | 0.614410101 | 0.710849891 | -0.09643979  | 1  | 263 |
| GPR62               | 0.724576193 | 0.822070389 | -0.097494196 | 4  | 264 |
| TRAV16              | 0.547292508 | 0.597150971 | -0.049858464 | 2  | 265 |
| TGFBR3L             | 0.45352614  | 0.503323177 | -0.049797037 | 4  | 266 |
| SCARF2              | 0.273210582 | 0.357018311 | -0.083807729 | 10 | 267 |
| CHIA                | 0.634567783 | 0.692137932 | -0.057570148 | 5  | 268 |
| OR4N4               | 0.440058134 | 0.508546208 | -0.068488073 | 1  | 269 |
| FTLP17              | 0.51814528  | 0.598423032 | -0.080277752 | 1  | 270 |
| HIST1H2APS6         | 0.51977818  | 0.449910136 | 0.069868045  | 1  | 271 |
| LCE1E               | 0.464425375 | 0.519649852 | -0.055224477 | 4  | 272 |
| RASGEF1A            | 0.557951656 | 0.508652318 | 0.049299337  | 3  | 273 |
| RPL4P5              | 0.615307968 | 0.69565618  | -0.080348212 | 2  | 274 |
| RNF166              | 0.165043301 | 0.214183279 | -0.049139978 | 8  | 275 |
| SUMO2P6             | 0.644989824 | 0.743875575 | -0.098885751 | 1  | 276 |
| LPAR3               | 0.346739699 | 0.395798313 | -0.049058614 | 7  | 277 |
| LGI1                | 0.488506103 | 0.537507268 | -0.049001166 | 10 | 278 |
| IGHV3-37            | 0.268202852 | 0.317092728 | -0.048889876 | 3  | 279 |
| TNR-IT1             | 0.414300235 | 0.541687169 | -0.127386935 | 1  | 280 |
| OR2S2               | 0.67908555  | 0.782355926 | -0.103270377 | 1  | 281 |
| FAM57B              | 0.309577052 | 0.255467686 | 0.054109366  | 4  | 282 |
| KRTAP19-2           | 0.291578749 | 0.379785487 | -0.088206737 | 1  | 283 |
| CTBP2P4             | 0.576320432 | 0.672338971 | -0.096018539 | 2  | 284 |
| OR10H5              | 0.521190183 | 0.569403902 | -0.048213719 | 3  | 285 |
| CT60                | 0.716715331 | 0.798541049 | -0.081825718 | 6  | 286 |
| MIR5701-1;MIR5701-2 | 0.716715331 | 0.798541049 | -0.081825718 | 6  | 287 |
| ATP1A1OS            | 0.283737133 | 0.331714572 | -0.047977439 | 11 | 288 |
| OR52A5              | 0.793693803 | 0.690734105 | 0.102959698  | 1  | 289 |
| PTP4A2P1            | 0.084815991 | 0.132685376 | -0.047869385 | 2  | 290 |
| CLCF1               | 0.49492381  | 0.54273789  | -0.04781408  | 13 | 291 |
| OR13C4              | 0.445526586 | 0.619164069 | -0.173637483 | 1  | 292 |
| ITLN1               | 0.664699915 | 0.565880466 | 0.098819448  | 5  | 293 |
| MARCH10             | 0.701235651 | 0.788278026 | -0.087042375 | 9  | 294 |
| LELP1               | 0.308074097 | 0.387121549 | -0.079047451 | 6  | 295 |
| MIR148B             | 0.586555024 | 0.654931358 | -0.068376334 | 4  | 296 |

|             |             |             |              |    |     |
|-------------|-------------|-------------|--------------|----|-----|
| BBS10       | 0.241064635 | 0.131405949 | 0.109658686  | 13 | 297 |
| CLUU10S     | 0.682151127 | 0.756167513 | -0.074016385 | 2  | 298 |
| SYT3        | 0.464084667 | 0.52910856  | -0.065023893 | 6  | 299 |
| PLXNB1      | 0.312566962 | 0.259929936 | 0.052637026  | 8  | 300 |
| CABS1       | 0.483377459 | 0.545131394 | -0.061753934 | 3  | 301 |
| ACTG1P4     | 0.751769834 | 0.681804771 | 0.069965063  | 2  | 302 |
| OR2A2       | 0.466598734 | 0.562201349 | -0.095602615 | 3  | 303 |
| PCDH15      | 0.282742289 | 0.334431375 | -0.051689086 | 9  | 304 |
| MND1        | 0.116295594 | 0.060928264 | 0.05536733   | 8  | 305 |
| MUC16       | 0.380792325 | 0.540941445 | -0.16014912  | 4  | 306 |
| MIR105-2    | 0.218162876 | 0.301904841 | -0.083741965 | 2  | 307 |
| CPT1A       | 0.556098075 | 0.693028314 | -0.136930239 | 3  | 308 |
| ANKRD20A5P  | 0.282132617 | 0.329070596 | -0.046937979 | 3  | 309 |
| F2RL2       | 0.512491607 | 0.560572309 | -0.048080702 | 5  | 310 |
| WDR86       | 0.41709132  | 0.46556177  | -0.048470451 | 5  | 311 |
| SNORD115-42 | 0.475671862 | 0.541195125 | -0.065523263 | 10 | 312 |
| TRAV8-5     | 0.27917838  | 0.327653481 | -0.048475101 | 2  | 313 |
| ATCAY       | 0.745533335 | 0.842734247 | -0.097200912 | 3  | 314 |
| SYBU        | 0.434826763 | 0.481356049 | -0.046529286 | 9  | 315 |
| IGFBP7      | 0.164716418 | 0.265689493 | -0.100973075 | 9  | 316 |
| PTPN3       | 0.495022979 | 0.561012018 | -0.065989039 | 3  | 317 |
| BDH2        | 0.392034078 | 0.441296105 | -0.049262027 | 5  | 318 |
| CPZ         | 0.530963413 | 0.57741693  | -0.046453517 | 10 | 319 |
| TRGV7       | 0.318490996 | 0.389720797 | -0.0712298   | 2  | 320 |
| CYP4A22     | 0.467276449 | 0.542546126 | -0.075269677 | 2  | 321 |
| TTI1        | 0.343867312 | 0.297428204 | 0.046439108  | 9  | 322 |
| SNORD115-35 | 0.403663344 | 0.479761138 | -0.076097794 | 6  | 323 |
| GPR82       | 0.666904448 | 0.762376992 | -0.095472544 | 1  | 324 |
| RARRES2P7   | 0.625781039 | 0.704643756 | -0.078862717 | 3  | 325 |
| WDR45B      | 0.421223983 | 0.375128988 | 0.046094996  | 4  | 326 |
| SEMA4C      | 0.366808358 | 0.318532672 | 0.048275686  | 3  | 327 |
| MPZL1       | 0.48792985  | 0.5422939   | -0.05436405  | 5  | 328 |
| ACAA1       | 0.33402133  | 0.402702498 | -0.068681167 | 13 | 329 |
| OR6C3       | 0.199349334 | 0.322278375 | -0.122929041 | 1  | 330 |
| RIN3        | 0.383206393 | 0.428877811 | -0.045671418 | 9  | 331 |
| FAM170A     | 0.667929133 | 0.744259852 | -0.076330719 | 8  | 332 |
| FGG         | 0.714681034 | 0.625362558 | 0.089318476  | 4  | 333 |
| CSAG2       | 0.597574235 | 0.523757361 | 0.073816874  | 1  | 334 |
| MAGEA2      | 0.597574235 | 0.523757361 | 0.073816874  | 1  | 335 |
| TRBV27      | 0.353965751 | 0.399426683 | -0.045460931 | 3  | 336 |
| GABRA6      | 0.154859929 | 0.200308798 | -0.045448869 | 8  | 337 |
| WNT7B       | 0.205962257 | 0.251346089 | -0.045383832 | 5  | 338 |
| IGFBP2      | 0.137785002 | 0.193463468 | -0.055678466 | 5  | 339 |
| SLC26A4-AS1 | 0.194576724 | 0.239754454 | -0.04517773  | 8  | 340 |
| SNX10       | 0.072053352 | 0.133642872 | -0.06158952  | 9  | 341 |
| GZMA        | 0.811172034 | 0.726738032 | 0.084434002  | 4  | 342 |
| OR52H1      | 0.247810412 | 0.354983158 | -0.107172746 | 3  | 343 |
| CRK         | 0.67395123  | 0.598618494 | 0.075332736  | 4  | 344 |
| SNORD62A    | 0.833029228 | 0.947634725 | -0.114605497 | 1  | 345 |
| PDE6H       | 0.768606322 | 0.844718512 | -0.07611219  | 6  | 346 |

|           |             |             |              |    |     |
|-----------|-------------|-------------|--------------|----|-----|
| IGFL1     | 0.564634124 | 0.6093643   | -0.044730176 | 5  | 347 |
| ZDHHC18   | 0.46800552  | 0.423293764 | 0.044711756  | 6  | 348 |
| RNU6-560P | 0.376182093 | 0.45732797  | -0.081145877 | 1  | 349 |
| ARMCX6    | 0.204246765 | 0.282291302 | -0.078044537 | 8  | 350 |
| PDYN      | 0.617032757 | 0.678948042 | -0.061915286 | 7  | 351 |
| RNU6-813P | 0.772750983 | 0.680347951 | 0.092403032  | 1  | 352 |
| GPR42     | 0.638921488 | 0.725448658 | -0.086527169 | 1  | 353 |
| IFNA7     | 0.650890332 | 0.568735697 | 0.082154635  | 1  | 354 |
| PKMP3     | 0.757422894 | 0.859635635 | -0.102212741 | 1  | 355 |
| KRT34     | 0.726279563 | 0.80367993  | -0.077400367 | 4  | 356 |
| TMEM54    | 0.564479975 | 0.520285255 | 0.04419472   | 5  | 357 |
| ZCCHC18   | 0.373801152 | 0.41769003  | -0.043888878 | 5  | 358 |
| ZNF786    | 0.152984666 | 0.196840251 | -0.043855585 | 7  | 359 |
| TAS2R38   | 0.705690724 | 0.771916277 | -0.066225553 | 6  | 360 |
| FAM19A1   | 0.368223896 | 0.412008588 | -0.043784693 | 3  | 361 |
| AFG3L2    | 0.210553582 | 0.263441626 | -0.052888044 | 10 | 362 |
| KRTAP20-4 | 0.485371413 | 0.586545979 | -0.101174566 | 1  | 363 |
| PRELP     | 0.700118772 | 0.772741792 | -0.072623021 | 4  | 364 |
| AKR1C4    | 0.659467281 | 0.749883168 | -0.090415887 | 3  | 365 |
| PRSS29P   | 0.418842046 | 0.536189649 | -0.117347603 | 1  | 366 |
| OR6W1P    | 0.478504213 | 0.562258176 | -0.083753964 | 2  | 367 |
| SPANXC    | 0.477245908 | 0.544062292 | -0.066816384 | 2  | 368 |
| ZNF853    | 0.501850553 | 0.448826387 | 0.053024166  | 5  | 369 |
| LINC00696 | 0.731171727 | 0.659887476 | 0.071284251  | 2  | 370 |
| OR9I1     | 0.306180419 | 0.426326382 | -0.120145963 | 2  | 371 |
| BHLHE23   | 0.561227896 | 0.63558759  | -0.074359695 | 9  | 372 |
| CHRN2     | 0.518247484 | 0.574896918 | -0.056649434 | 10 | 373 |
| FBXO27    | 0.533474916 | 0.577362341 | -0.043887425 | 7  | 374 |
| SOX6      | 0.414388792 | 0.456861199 | -0.042472406 | 5  | 375 |
| SYNPR     | 0.523637609 | 0.675715687 | -0.152078078 | 1  | 376 |
| COX4I1    | 0.209419242 | 0.251764245 | -0.042345002 | 6  | 377 |
| MIR3663   | 0.7116284   | 0.636355755 | 0.075272645  | 5  | 378 |
| ZNF597    | 0.543079797 | 0.609847164 | -0.066767366 | 12 | 379 |
| SHISA5    | 0.734637015 | 0.649913597 | 0.084723418  | 3  | 380 |
| SPATA6L   | 0.116446054 | 0.177798413 | -0.061352358 | 4  | 381 |
| PCDHA13   | 0.686967359 | 0.737144529 | -0.05017717  | 10 | 382 |
| GXYLT2    | 0.282071756 | 0.324148456 | -0.0420767   | 2  | 383 |
| TMC4      | 0.393436399 | 0.338323451 | 0.055112948  | 6  | 384 |
| TMSB15B   | 0.333691731 | 0.396247878 | -0.062556147 | 3  | 385 |
| TP53I11   | 0.618144429 | 0.671764527 | -0.053620097 | 11 | 386 |
| TRAC      | 0.736527245 | 0.831545822 | -0.095018577 | 1  | 387 |
| CHST4     | 0.903250681 | 0.807931397 | 0.095319283  | 3  | 388 |
| PRPH      | 0.571061496 | 0.644979254 | -0.073917758 | 1  | 389 |
| OVCH2     | 0.384932659 | 0.444463803 | -0.059531143 | 4  | 390 |
| ATP6V1G1  | 0.318098627 | 0.359974905 | -0.041876278 | 7  | 391 |
| ZNF619    | 0.328104223 | 0.370794843 | -0.042690621 | 8  | 392 |
| NTAN1P3   | 0.525931884 | 0.421038107 | 0.104893777  | 1  | 393 |
| PPIAP17   | 0.587054757 | 0.730415787 | -0.14336103  | 1  | 394 |
| OR2AT4    | 0.614289018 | 0.557583575 | 0.056705442  | 4  | 395 |
| C20orf166 | 0.690536245 | 0.632534949 | 0.058001297  | 9  | 396 |

|             |             |             |              |    |     |
|-------------|-------------|-------------|--------------|----|-----|
| PTGES3P1    | 0.798023823 | 0.899894362 | -0.101870539 | 1  | 397 |
| TRPS1       | 0.417414709 | 0.471221882 | -0.053807173 | 1  | 398 |
| LINC00507   | 0.279807869 | 0.39196523  | -0.112157361 | 1  | 399 |
| SPINT4      | 0.318588208 | 0.478298833 | -0.159710625 | 2  | 400 |
| CHIAP2      | 0.411260268 | 0.493045485 | -0.081785217 | 4  | 401 |
| PACSIN2     | 0.088660465 | 0.129857903 | -0.041197438 | 6  | 402 |
| CA2         | 0.096817819 | 0.14767996  | -0.050862141 | 7  | 403 |
| KRTAP10-9   | 0.66157182  | 0.717998919 | -0.056427099 | 4  | 404 |
| KPRP        | 0.515417324 | 0.556534247 | -0.041116923 | 6  | 405 |
| DCTD        | 0.360202695 | 0.419592269 | -0.059389574 | 9  | 406 |
| TCHH        | 0.665060574 | 0.72121275  | -0.056152176 | 6  | 407 |
| MIR515-1    | 0.28401822  | 0.392156128 | -0.108137908 | 4  | 408 |
| MIR527      | 0.736273729 | 0.828472924 | -0.092199195 | 3  | 409 |
| C22orf26    | 0.243838289 | 0.30195202  | -0.058113731 | 11 | 410 |
| MIR520E     | 0.546087476 | 0.599366333 | -0.053278857 | 2  | 411 |
| NAB1        | 0.784569459 | 0.883251935 | -0.098682476 | 1  | 412 |
| OR52M1      | 0.557589776 | 0.63194514  | -0.074355364 | 5  | 413 |
| FAM217B     | 0.657330459 | 0.697719158 | -0.040388699 | 8  | 414 |
| TFAP2D      | 0.131532158 | 0.171829341 | -0.040297183 | 5  | 415 |
| NLRP9       | 0.668193371 | 0.730050388 | -0.061857017 | 5  | 416 |
| AGGF1P2     | 0.597794401 | 0.672546858 | -0.074752457 | 1  | 417 |
| SLC2A3      | 0.591014614 | 0.662066054 | -0.07105144  | 7  | 418 |
| PNPLA4      | 0.37528996  | 0.30819025  | 0.067099711  | 15 | 419 |
| IRX6        | 0.397537103 | 0.437598235 | -0.040061131 | 4  | 420 |
| KRTAP6-3    | 0.612991839 | 0.694983736 | -0.081991897 | 5  | 421 |
| C10orf131   | 0.241258899 | 0.173890368 | 0.067368531  | 11 | 422 |
| RN7SL526P   | 0.197099968 | 0.290591158 | -0.093491191 | 1  | 423 |
| KRTAP19-4   | 0.199877309 | 0.290357872 | -0.090480564 | 2  | 424 |
| PRKRIRP2    | 0.450817708 | 0.505277435 | -0.054459726 | 2  | 425 |
| NQO1        | 0.117283628 | 0.157101141 | -0.039817513 | 8  | 426 |
| SNRPD2P1    | 0.7848898   | 0.852492221 | -0.067602421 | 5  | 427 |
| RFPL2       | 0.5474095   | 0.614791422 | -0.067381922 | 5  | 428 |
| SCUBE2      | 0.351918533 | 0.416013446 | -0.064094912 | 2  | 429 |
| FAM47A      | 0.600166948 | 0.650338281 | -0.050171333 | 6  | 430 |
| OLFM4       | 0.732474465 | 0.797862143 | -0.065387677 | 6  | 431 |
| CCNYL3      | 0.22782681  | 0.296009115 | -0.068182304 | 1  | 432 |
| TCEAL6      | 0.513147954 | 0.561464992 | -0.048317038 | 4  | 433 |
| CYP11B1     | 0.491275045 | 0.549272259 | -0.057997214 | 6  | 434 |
| LCE2A       | 0.162113783 | 0.254806961 | -0.092693178 | 4  | 435 |
| FCRL3       | 0.272299636 | 0.311783807 | -0.039484171 | 8  | 436 |
| SPANXD      | 0.595866154 | 0.640403813 | -0.044537659 | 2  | 437 |
| SNORD18B    | 0.566348703 | 0.625063485 | -0.058714781 | 8  | 438 |
| MIR767      | 0.164615486 | 0.229211463 | -0.064595977 | 3  | 439 |
| MIR498      | 0.432751229 | 0.500459313 | -0.067708085 | 5  | 440 |
| DNAJB14     | 0.120837163 | 0.161560554 | -0.040723391 | 7  | 441 |
| FAM122A     | 0.235431315 | 0.274791109 | -0.039359794 | 5  | 442 |
| FTH1P19     | 0.791999344 | 0.860862473 | -0.068863128 | 5  | 443 |
| SNORD115-20 | 0.389042346 | 0.45710888  | -0.068066534 | 5  | 444 |
| ANKRD20A14P | 0.418272768 | 0.469375869 | -0.051103102 | 2  | 445 |
| SPAG16      | 0.151978098 | 0.191234251 | -0.039256153 | 11 | 446 |

|             |             |             |              |    |     |
|-------------|-------------|-------------|--------------|----|-----|
| UBQLNL      | 0.257735609 | 0.402688267 | -0.144952658 | 3  | 447 |
| OR6X1       | 0.481834453 | 0.530977922 | -0.04914347  | 5  | 448 |
| RARRES2P9   | 0.376391238 | 0.29120189  | 0.085189348  | 2  | 449 |
| WFDC8       | 0.772132405 | 0.692024425 | 0.080107979  | 2  | 450 |
| BCL9        | 0.11522003  | 0.163585988 | -0.048365957 | 6  | 451 |
| CDHR2       | 0.612269525 | 0.546250657 | 0.066018867  | 1  | 452 |
| FLG2        | 0.680019506 | 0.760756797 | -0.080737292 | 3  | 453 |
| CETN2       | 0.413048297 | 0.458144505 | -0.045096208 | 14 | 454 |
| LINC00703   | 0.736577625 | 0.824955334 | -0.088377709 | 1  | 455 |
| LDHD        | 0.579114379 | 0.513392309 | 0.06572207   | 8  | 456 |
| GPR183      | 0.671471885 | 0.71026817  | -0.038796285 | 4  | 457 |
| C1QTNF4     | 0.654737713 | 0.720644388 | -0.065906675 | 5  | 458 |
| KCTD1       | 0.196629657 | 0.235419571 | -0.038789914 | 4  | 459 |
| RFC5        | 0.550469317 | 0.420590751 | 0.129878566  | 1  | 460 |
| ITPKB       | 0.371086143 | 0.428941797 | -0.057855654 | 9  | 461 |
| TRBJ2-1     | 0.618552685 | 0.673999622 | -0.055446938 | 8  | 462 |
| ARHGAP32    | 0.346457174 | 0.275748508 | 0.070708666  | 6  | 463 |
| RDH8        | 0.576190123 | 0.649119278 | -0.072929155 | 4  | 464 |
| RNU6-1061P  | 0.051845171 | 0.090412349 | -0.038567178 | 3  | 465 |
| HCRT2       | 0.330023002 | 0.36853257  | -0.038509568 | 6  | 466 |
| TAS2R40     | 0.591638135 | 0.640873986 | -0.049235851 | 4  | 467 |
| NAA60       | 0.569726458 | 0.628856609 | -0.059130151 | 12 | 468 |
| MIR4270     | 0.845412011 | 0.75580502  | 0.089606991  | 1  | 469 |
| DUSP23      | 0.49763749  | 0.535914687 | -0.038277197 | 7  | 470 |
| CPQ         | 0.321350615 | 0.361370538 | -0.040019923 | 14 | 471 |
| SRSF10      | 0.742436514 | 0.687022484 | 0.055414029  | 5  | 472 |
| ATE1        | 0.082943102 | 0.044825903 | 0.038117199  | 3  | 473 |
| OR7E155P    | 0.753731675 | 0.824505682 | -0.070774007 | 2  | 474 |
| OR7E37P     | 0.753731675 | 0.824505682 | -0.070774007 | 2  | 475 |
| EBP         | 0.166562261 | 0.236727638 | -0.070165377 | 3  | 476 |
| METTL21A    | 0.416876715 | 0.363769164 | 0.053107551  | 5  | 477 |
| PRPS2       | 0.26259044  | 0.349054627 | -0.086464187 | 10 | 478 |
| KCNJ3       | 0.312118968 | 0.265612017 | 0.046506951  | 10 | 479 |
| MIR500A     | 0.745985247 | 0.701766665 | 0.044218582  | 5  | 480 |
| TBC1D3P7    | 0.66414846  | 0.749873068 | -0.085724608 | 2  | 481 |
| PCDHB1      | 0.409644058 | 0.44713151  | -0.037487453 | 9  | 482 |
| HMG2P6      | 0.604136772 | 0.666463186 | -0.062326413 | 2  | 483 |
| DAP         | 0.304525623 | 0.267067209 | 0.037458414  | 5  | 484 |
| TRIM29      | 0.911406232 | 0.817150221 | 0.094256012  | 1  | 485 |
| RPRD1B      | 0.278761511 | 0.241361536 | 0.037399975  | 8  | 486 |
| MIR520C     | 0.201418376 | 0.271487318 | -0.070068943 | 4  | 487 |
| SNORD115-23 | 0.276135075 | 0.343208994 | -0.067073919 | 8  | 488 |
| PDZD11      | 0.425801434 | 0.470218293 | -0.044416859 | 5  | 489 |
| PPFIBP1     | 0.20861876  | 0.162247083 | 0.046371677  | 3  | 490 |
| MIR518F     | 0.372663973 | 0.409916199 | -0.037252226 | 5  | 491 |
| ADH1B       | 0.199405308 | 0.265180106 | -0.065774798 | 3  | 492 |
| PRAMEF21    | 0.701093451 | 0.77631784  | -0.075224389 | 2  | 493 |
| PRR5        | 0.375819589 | 0.298825267 | 0.076994323  | 6  | 494 |
| TRIM34      | 0.856666979 | 0.775075918 | 0.081591061  | 3  | 495 |
| PPP1R17     | 0.578006383 | 0.661339844 | -0.08333346  | 7  | 496 |

|        |             |             |              |    |     |
|--------|-------------|-------------|--------------|----|-----|
| ZNF449 | 0.373004067 | 0.430938494 | -0.057934427 | 16 | 497 |
| ZNF75D | 0.373004067 | 0.430938494 | -0.057934427 | 16 | 498 |
| MAGED1 | 0.477973891 | 0.575669497 | -0.097695606 | 5  | 499 |
| MTHFSD | 0.216887957 | 0.2579791   | -0.041091143 | 15 | 500 |

**Supplementary Table S8. List of the 500 top-ranked, gene symbol-associated differentially methylated gene bodies after induced overexpression of *TET1* .**

| gene_symbol | beta.TET1+Dox | beta.TET1-Dox | difference   | num.sites | rank |
|-------------|---------------|---------------|--------------|-----------|------|
| LINC00424   | 0.336338211   | 0.660893691   | -0.324555479 | 1         | 1    |
| MIR100      | 0.356190771   | 0.723647342   | -0.36745657  | 1         | 2    |
| USP12-AS1   | 0.39039492    | 0.64608486    | -0.25568994  | 1         | 3    |
| ZNF726      | 0.141953305   | 0.327020175   | -0.18506687  | 1         | 4    |
| PRKRIRP7    | 0.339430918   | 0.145788105   | 0.193642813  | 1         | 5    |
| DEFB133     | 0.225037558   | 0.39363274    | -0.168595181 | 2         | 6    |
| AKR1C6P     | 0.197497691   | 0.396302977   | -0.198805287 | 1         | 7    |
| RNA5SP42    | 0.391115907   | 0.588939481   | -0.197823575 | 1         | 8    |
| MROH9       | 0.522698559   | 0.666302755   | -0.143604196 | 2         | 9    |
| SNORD109A   | 0.567836579   | 0.36022288    | 0.207613698  | 1         | 10   |
| CABS1       | 0.159029591   | 0.387320059   | -0.228290468 | 1         | 11   |
| MIR647      | 0.238631499   | 0.374134489   | -0.13550299  | 1         | 12   |
| SNTN        | 0.406437567   | 0.673327653   | -0.266890086 | 1         | 13   |
| KRTAP4-12   | 0.378210321   | 0.56732251    | -0.189112189 | 1         | 14   |
| LCE1E       | 0.249351773   | 0.375327023   | -0.12597525  | 3         | 15   |
| TSPY13P     | 0.396539801   | 0.281606303   | 0.114933498  | 1         | 16   |
| OR1E2       | 0.269000307   | 0.382761544   | -0.113761237 | 2         | 17   |
| ALDOC       | 0.268593441   | 0.386073075   | -0.117479634 | 9         | 18   |
| IFI44       | 0.550823843   | 0.749275687   | -0.198451845 | 1         | 19   |
| OR4K5       | 0.383070536   | 0.520239508   | -0.137168972 | 1         | 20   |
| MIR485      | 0.544979723   | 0.734636336   | -0.189656613 | 1         | 21   |
| ANKRD18EP   | 0.211236362   | 0.315042136   | -0.103805774 | 1         | 22   |
| OR11H6      | 0.444258517   | 0.599321031   | -0.155062515 | 1         | 23   |
| RNU6-173P   | 0.297431615   | 0.412957275   | -0.11552566  | 1         | 24   |
| MIR518E     | 0.295502857   | 0.405080921   | -0.109578064 | 1         | 25   |
| ADH7        | 0.162191641   | 0.442765495   | -0.280573855 | 1         | 26   |
| CNTN4-AS1   | 0.722850149   | 0.589800326   | 0.133049823  | 3         | 27   |
| TRAT1       | 0.197950643   | 0.34080076    | -0.142850118 | 1         | 28   |
| MYO16-AS1   | 0.351806686   | 0.470191047   | -0.118384361 | 1         | 29   |
| UGT2B10     | 0.216353361   | 0.373730151   | -0.15737679  | 1         | 30   |
| HNRNPDP2    | 0.56156639    | 0.756302233   | -0.194735843 | 1         | 31   |
| LCE4A       | 0.357710668   | 0.460057716   | -0.102347048 | 4         | 32   |
| OR6V1       | 0.282512275   | 0.383046151   | -0.100533877 | 1         | 33   |
| OR1E1       | 0.158426608   | 0.258677758   | -0.10025115  | 1         | 34   |
| WFDC12      | 0.784002164   | 0.654596938   | 0.129405226  | 2         | 35   |
| SNORD12B    | 0.321547336   | 0.483299672   | -0.161752336 | 1         | 36   |
| TNFAIP8L2   | 0.756095827   | 0.852981672   | -0.096885845 | 4         | 37   |
| KRTAP6-2    | 0.3746847     | 0.490658355   | -0.115973655 | 3         | 38   |
| OR6C6       | 0.279596516   | 0.459161158   | -0.179564642 | 1         | 39   |
| OR6C72P     | 0.279596516   | 0.459161158   | -0.179564642 | 1         | 40   |
| KRTAP23-1   | 0.338477903   | 0.441357645   | -0.102879742 | 1         | 41   |
| MBOAT4      | 0.681341303   | 0.466859742   | 0.214481562  | 1         | 42   |
| LCE1B       | 0.46301964    | 0.57139399    | -0.10837435  | 2         | 43   |
| KRTAP27-1   | 0.425307907   | 0.605389265   | -0.180081358 | 1         | 44   |
| PPP2R2B-IT1 | 0.139926348   | 0.28262042    | -0.142694072 | 1         | 45   |
| ZNF32       | 0.383227417   | 0.486865848   | -0.103638431 | 4         | 46   |

|             |             |             |              |   |    |
|-------------|-------------|-------------|--------------|---|----|
| HULC        | 0.564264647 | 0.742375296 | -0.178110649 | 1 | 47 |
| PRKRIRP2    | 0.410442286 | 0.521528804 | -0.111086519 | 1 | 48 |
| TAS2R38     | 0.568370974 | 0.65879565  | -0.090424676 | 2 | 49 |
| LCE1C       | 0.390379191 | 0.537884484 | -0.147505293 | 2 | 50 |
| LARP1BP1    | 0.476326614 | 0.588592322 | -0.112265708 | 2 | 51 |
| MAST4-AS1   | 0.15643913  | 0.260674784 | -0.104235654 | 1 | 52 |
| LINC00898   | 0.748081029 | 0.909072878 | -0.160991849 | 2 | 53 |
| SNORA69     | 0.178096415 | 0.344683956 | -0.166587541 | 1 | 54 |
| LPAL2       | 0.484751706 | 0.572546526 | -0.08779482  | 4 | 55 |
| PF4V1       | 0.433144261 | 0.582972533 | -0.149828272 | 6 | 56 |
| ABCA10      | 0.535260991 | 0.671412314 | -0.136151323 | 2 | 57 |
| OR52E6      | 0.484743546 | 0.787624802 | -0.302881256 | 1 | 58 |
| NAV2-IT1    | 0.647664357 | 0.814213954 | -0.166549597 | 1 | 59 |
| TRAV12-3    | 0.557900442 | 0.758800636 | -0.200900194 | 1 | 60 |
| OSBPL10-AS1 | 0.609447448 | 0.760969267 | -0.151521818 | 1 | 61 |
| MIR105-2    | 0.165779905 | 0.243066791 | -0.077286886 | 1 | 62 |
| OR111       | 0.741208022 | 0.919279972 | -0.178071951 | 1 | 63 |
| SPANXA2-OT1 | 0.377170654 | 0.604684169 | -0.227513514 | 1 | 64 |
| TAS2R8      | 0.579226431 | 0.467330028 | 0.111896402  | 1 | 65 |
| KRTAP19-3   | 0.40119424  | 0.510765429 | -0.109571189 | 2 | 66 |
| KRTAP19-6   | 0.451327871 | 0.564224864 | -0.112896993 | 1 | 67 |
| EIF3CL      | 0.315597366 | 0.240940121 | 0.074657245  | 1 | 68 |
| KCNH1-IT1   | 0.83028015  | 0.672647505 | 0.157632645  | 1 | 69 |
| STC1        | 0.347515227 | 0.421856996 | -0.074341769 | 3 | 70 |
| LDLRAD1     | 0.631102819 | 0.743444966 | -0.112342146 | 3 | 71 |
| NLRP5       | 0.215878098 | 0.347588996 | -0.131710898 | 2 | 72 |
| GPX8        | 0.362530153 | 0.436037237 | -0.073507084 | 2 | 73 |
| OR1N1       | 0.120742614 | 0.267759916 | -0.147017302 | 1 | 74 |
| DEFA10P     | 0.484154935 | 0.595003224 | -0.110848289 | 1 | 75 |
| SNORD115-23 | 0.365640832 | 0.449663449 | -0.084022617 | 1 | 76 |
| CARD6       | 0.269699454 | 0.348539727 | -0.078840272 | 6 | 77 |
| RARRES2P9   | 0.575452245 | 0.430186482 | 0.145265763  | 1 | 78 |
| C4orf6      | 0.472210988 | 0.584982334 | -0.112771346 | 5 | 79 |
| OXCT1-AS1   | 0.326376411 | 0.412767809 | -0.086391398 | 9 | 80 |
| MROH2B      | 0.143516061 | 0.260862324 | -0.117346263 | 2 | 81 |
| CLEC5A      | 0.6628762   | 0.749968477 | -0.087092278 | 5 | 82 |
| MIR514A1    | 0.739708236 | 0.896984396 | -0.15727616  | 1 | 83 |
| NTF6A       | 0.633939102 | 0.52279486  | 0.111144241  | 1 | 84 |
| OR5A1       | 0.444983101 | 0.537408523 | -0.092425422 | 3 | 85 |
| CYP4F22     | 0.50461871  | 0.572836352 | -0.068217642 | 9 | 86 |
| SNORA48     | 0.367344505 | 0.444421802 | -0.077077297 | 1 | 87 |
| PASD1       | 0.428102427 | 0.514869978 | -0.086767551 | 3 | 88 |
| MYD88       | 0.504316129 | 0.619999181 | -0.115683052 | 8 | 89 |
| CMA1        | 0.513299606 | 0.618339963 | -0.105040357 | 1 | 90 |
| CTSG        | 0.436620273 | 0.505156846 | -0.068536573 | 5 | 91 |
| RDH8        | 0.568015727 | 0.681806697 | -0.11379097  | 4 | 92 |
| SMCP        | 0.51762225  | 0.626787949 | -0.109165699 | 5 | 93 |
| ISX         | 0.561319509 | 0.664716802 | -0.103397293 | 3 | 94 |
| IFI16       | 0.275237999 | 0.346274315 | -0.071036317 | 9 | 95 |
| IGHV3-21    | 0.321339923 | 0.488395218 | -0.167055295 | 1 | 96 |



|             |             |             |              |    |     |
|-------------|-------------|-------------|--------------|----|-----|
| GATSL2      | 0.173141094 | 0.274325096 | -0.101184003 | 1  | 97  |
| MMP8        | 0.811605298 | 0.703131496 | 0.108473802  | 2  | 98  |
| STAU2-AS1   | 0.236357758 | 0.333395451 | -0.097037693 | 5  | 99  |
| HIST1H2AL   | 0.489764861 | 0.591924222 | -0.102159361 | 7  | 100 |
| RELN        | 0.49287631  | 0.556829789 | -0.063953479 | 14 | 101 |
| MIR648      | 0.374557592 | 0.50826036  | -0.133702768 | 1  | 102 |
| CD163       | 0.649384596 | 0.544308805 | 0.105075791  | 1  | 103 |
| LSMEM1      | 0.650865576 | 0.751565647 | -0.100700071 | 5  | 104 |
| TRBV23-1    | 0.529455117 | 0.602115284 | -0.072660166 | 2  | 105 |
| OR1A1       | 0.277491325 | 0.376928972 | -0.099437646 | 1  | 106 |
| SLAMF6      | 0.396947995 | 0.459970769 | -0.063022774 | 3  | 107 |
| PPP1R17     | 0.609734619 | 0.67603798  | -0.066303361 | 9  | 108 |
| MIR376C     | 0.544638171 | 0.647309795 | -0.102671624 | 1  | 109 |
| OR9I1       | 0.428015041 | 0.593717001 | -0.16570196  | 1  | 110 |
| MIR105-1    | 0.287074852 | 0.374566884 | -0.087492031 | 1  | 111 |
| CSTF2       | 0.509157264 | 0.579668423 | -0.070511159 | 3  | 112 |
| ZFP42       | 0.630739268 | 0.754043413 | -0.123304145 | 10 | 113 |
| SNORD115-33 | 0.318028299 | 0.410073089 | -0.09204479  | 1  | 114 |
| TBC1D26     | 0.659150722 | 0.532495124 | 0.126655598  | 2  | 115 |
| KERA        | 0.396694858 | 0.53871267  | -0.142017812 | 1  | 116 |
| OR4N5       | 0.262734705 | 0.42565986  | -0.162925154 | 1  | 117 |
| XG          | 0.371529099 | 0.432378222 | -0.060849123 | 4  | 118 |
| CCDC129     | 0.493418234 | 0.574737893 | -0.081319659 | 10 | 119 |
| RPS26P49    | 0.300035372 | 0.192829986 | 0.107205386  | 1  | 120 |
| MIR130B     | 0.762996969 | 0.899292269 | -0.1362953   | 1  | 121 |
| PTCHD3P3    | 0.619005525 | 0.687315496 | -0.068309971 | 2  | 122 |
| EPGN        | 0.684264433 | 0.804793618 | -0.120529186 | 1  | 123 |
| GIMAP4      | 0.486431313 | 0.544998073 | -0.058566676 | 4  | 124 |
| CTAGE14P    | 0.609000347 | 0.669721849 | -0.060721503 | 3  | 125 |
| IGFL1       | 0.722117696 | 0.618978303 | 0.103139393  | 3  | 126 |
| FAM92A1P2   | 0.685211825 | 0.80513095  | -0.119919125 | 1  | 127 |
| MAGEB3      | 0.318720413 | 0.426332431 | -0.107612018 | 5  | 128 |
| MIR518C     | 0.108387866 | 0.16645225  | -0.058064384 | 1  | 129 |
| GATSL3      | 0.267012567 | 0.324901243 | -0.057888676 | 4  | 130 |
| KLK13       | 0.49768579  | 0.579023488 | -0.081337698 | 5  | 131 |
| HTN1        | 0.380824458 | 0.448671878 | -0.06784742  | 2  | 132 |
| SIGLEC14    | 0.374835061 | 0.508266654 | -0.133431593 | 2  | 133 |
| KRTAP19-1   | 0.254471977 | 0.328563691 | -0.074091714 | 1  | 134 |
| DPPA2       | 0.764863451 | 0.895260048 | -0.130396597 | 3  | 135 |
| GCG         | 0.619589166 | 0.724282336 | -0.10469317  | 2  | 136 |
| KRT18P42    | 0.661753511 | 0.774130354 | -0.112376843 | 1  | 137 |
| SLC2A3      | 0.3552381   | 0.438416279 | -0.083178179 | 3  | 138 |
| TRIML2      | 0.567805835 | 0.677696299 | -0.109890463 | 10 | 139 |
| GPX1P2      | 0.424179201 | 0.506073885 | -0.081894684 | 3  | 140 |
| OGFOD1      | 0.120316508 | 0.175529063 | -0.055212554 | 7  | 141 |
| TAF13       | 0.275417801 | 0.330484084 | -0.055066283 | 4  | 142 |
| KIAA0125    | 0.185505799 | 0.261840107 | -0.076334308 | 1  | 143 |
| MIR2117     | 0.575917559 | 0.385876223 | 0.190041336  | 1  | 144 |
| SERPINB2    | 0.7499493   | 0.815824618 | -0.065875318 | 5  | 145 |
| PRAMEF12    | 0.45753836  | 0.529516651 | -0.071978291 | 2  | 146 |

|            |             |             |              |    |     |
|------------|-------------|-------------|--------------|----|-----|
| POU5F1P6   | 0.63566149  | 0.739191406 | -0.103529916 | 1  | 147 |
| KRTAP5-9   | 0.735854032 | 0.825600988 | -0.089746955 | 2  | 148 |
| SPZ1       | 0.768904016 | 0.686929066 | 0.08197495   | 2  | 149 |
| SNORD114-9 | 0.604533226 | 0.460715424 | 0.143817802  | 1  | 150 |
| SNORD71    | 0.716107333 | 0.829818133 | -0.1137108   | 1  | 151 |
| PGM5P1     | 0.455858489 | 0.551602669 | -0.09574418  | 1  | 152 |
| MIR29A     | 0.822554057 | 0.710184485 | 0.112369572  | 1  | 153 |
| PDE6H      | 0.770099565 | 0.872614997 | -0.102515432 | 2  | 154 |
| RXRG       | 0.331174487 | 0.398457337 | -0.06728285  | 4  | 155 |
| GZMB       | 0.578885307 | 0.660240842 | -0.081355534 | 2  | 156 |
| ZNF510     | 0.550938055 | 0.60257112  | -0.051633065 | 5  | 157 |
| RAB39B     | 0.58950132  | 0.644202938 | -0.054701618 | 7  | 158 |
| MAGEB6     | 0.615590665 | 0.70287404  | -0.087283375 | 4  | 159 |
| RPL4P5     | 0.615307968 | 0.69565618  | -0.080348212 | 2  | 160 |
| SSMEM1     | 0.735856773 | 0.684907626 | 0.050949147  | 3  | 161 |
| HAUS6P1    | 0.460432783 | 0.544058012 | -0.083625229 | 2  | 162 |
| TLL11-IT1  | 0.739076871 | 0.835673957 | -0.096597086 | 3  | 163 |
| SLC9A7P1   | 0.597310009 | 0.657081606 | -0.059771597 | 7  | 164 |
| IDO1       | 0.47832874  | 0.55205555  | -0.073726809 | 3  | 165 |
| CD200R1    | 0.57503324  | 0.635405603 | -0.060372363 | 4  | 166 |
| C20orf203  | 0.909440068 | 0.790813619 | 0.118626449  | 1  | 167 |
| RPTN       | 0.570188352 | 0.671115534 | -0.100927182 | 3  | 168 |
| OR52A5     | 0.793693803 | 0.690734105 | 0.102959698  | 1  | 169 |
| HIGD1AP5   | 0.895983769 | 0.780060491 | 0.115923277  | 1  | 170 |
| SNORD18A   | 0.222696228 | 0.275164907 | -0.052468679 | 1  | 171 |
| PRAMEF11   | 0.503418719 | 0.588813548 | -0.08539483  | 3  | 172 |
| CDH9       | 0.471668592 | 0.532811554 | -0.061142961 | 14 | 173 |
| LPA        | 0.492996339 | 0.424342827 | 0.068653512  | 4  | 174 |
| MIR425     | 0.739501801 | 0.849203519 | -0.109701718 | 1  | 175 |
| FRMPD1     | 0.438596034 | 0.488059488 | -0.049463454 | 6  | 176 |
| MS4A12     | 0.179947226 | 0.322585064 | -0.142637838 | 1  | 177 |
| KRTAP19-2  | 0.291578749 | 0.379785487 | -0.088206737 | 1  | 178 |
| NMS        | 0.51282128  | 0.600441236 | -0.087619956 | 2  | 179 |
| TSPY11P    | 0.208383156 | 0.257553544 | -0.049170388 | 1  | 180 |
| MIR1208    | 0.592941651 | 0.680128386 | -0.087186735 | 1  | 181 |
| VN1R5      | 0.354813549 | 0.507161707 | -0.152348158 | 1  | 182 |
| SMCO1      | 0.648911821 | 0.705711492 | -0.056799672 | 3  | 183 |
| OR13C4     | 0.445526586 | 0.619164069 | -0.173637483 | 1  | 184 |
| FBXO36-IT1 | 0.624493678 | 0.715268054 | -0.090774376 | 1  | 185 |
| ABCD1P3    | 0.51562126  | 0.590629696 | -0.075008436 | 1  | 186 |
| S100A7A    | 0.249663709 | 0.329440379 | -0.07977667  | 4  | 187 |
| MIR520F    | 0.60236469  | 0.707418883 | -0.105054193 | 1  | 188 |
| SH2D1B     | 0.588298656 | 0.662289944 | -0.073991288 | 3  | 189 |
| TMEM158    | 0.161701286 | 0.276520805 | -0.114819519 | 2  | 190 |
| PRAME      | 0.533750785 | 0.618100398 | -0.084349614 | 8  | 191 |
| ABCF3      | 0.337122297 | 0.385011619 | -0.047889322 | 6  | 192 |
| GP2        | 0.3367388   | 0.384556448 | -0.047817648 | 4  | 193 |
| CTU2       | 0.598135569 | 0.645634802 | -0.047499234 | 8  | 194 |
| NAV3       | 0.472483323 | 0.536204313 | -0.06372099  | 14 | 195 |
| SNORD35B   | 0.65630181  | 0.565033053 | 0.091268756  | 1  | 196 |

|              |             |             |              |    |     |
|--------------|-------------|-------------|--------------|----|-----|
| MAGEA2       | 0.597574235 | 0.523757361 | 0.073816874  | 1  | 197 |
| DCAF8L2      | 0.338095296 | 0.40195021  | -0.063854914 | 6  | 198 |
| OR4A5        | 0.123270026 | 0.18379361  | -0.060523584 | 1  | 199 |
| FCRL3        | 0.330709255 | 0.377672689 | -0.046963434 | 5  | 200 |
| OR6Y1        | 0.391994676 | 0.304039145 | 0.087955532  | 2  | 201 |
| CLLU1        | 0.719025067 | 0.807681829 | -0.088656762 | 6  | 202 |
| C12orf50     | 0.476954383 | 0.398335145 | 0.078619238  | 4  | 203 |
| FAM47A       | 0.677625955 | 0.742607115 | -0.06498116  | 10 | 204 |
| RERGL        | 0.72407417  | 0.815286161 | -0.091211991 | 7  | 205 |
| ACTL6B       | 0.529516429 | 0.582866644 | -0.053350216 | 6  | 206 |
| KRTAP13-1    | 0.223531846 | 0.285136406 | -0.06160456  | 1  | 207 |
| IDO2         | 0.454416057 | 0.51433919  | -0.059923132 | 15 | 208 |
| SNORD37      | 0.879981181 | 0.773053516 | 0.106927665  | 1  | 209 |
| SERPINB3     | 0.57288825  | 0.684606742 | -0.111718492 | 2  | 210 |
| LRRCS5       | 0.577937543 | 0.632171275 | -0.054233732 | 5  | 211 |
| SCG2         | 0.293446724 | 0.350761348 | -0.057314624 | 5  | 212 |
| SSX6         | 0.708776545 | 0.805925415 | -0.09714887  | 1  | 213 |
| BCMO1        | 0.517319629 | 0.57423541  | -0.056915781 | 7  | 214 |
| MIR4724      | 0.352491041 | 0.519825852 | -0.167334811 | 1  | 215 |
| DNAJB5       | 0.84238854  | 0.741433059 | 0.100955481  | 1  | 216 |
| GPR42        | 0.638921488 | 0.725448658 | -0.086527169 | 1  | 217 |
| CSN2         | 0.38570222  | 0.436323858 | -0.050621638 | 2  | 218 |
| PYDC2        | 0.722972528 | 0.820646963 | -0.097674435 | 1  | 219 |
| PKMP3        | 0.757422894 | 0.859635635 | -0.102212741 | 1  | 220 |
| STX18-IT1    | 0.738726511 | 0.824704287 | -0.085977777 | 2  | 221 |
| LAYN         | 0.586681888 | 0.631906081 | -0.045224193 | 15 | 222 |
| NBPF22P      | 0.437819753 | 0.496727094 | -0.058907341 | 1  | 223 |
| DEFB126      | 0.454398048 | 0.393148466 | 0.061249582  | 2  | 224 |
| OR1L3        | 0.298414059 | 0.362415386 | -0.064001327 | 3  | 225 |
| PSG9         | 0.400524181 | 0.450716622 | -0.050192441 | 2  | 226 |
| KIR3DL2      | 0.711487796 | 0.767861889 | -0.056374093 | 5  | 227 |
| GPR112       | 0.425510218 | 0.495628046 | -0.070117828 | 2  | 228 |
| GPAA1        | 0.344677642 | 0.293242178 | 0.051435464  | 4  | 229 |
| OR7E37P      | 0.726365435 | 0.642006245 | 0.084359189  | 1  | 230 |
| PTGR1        | 0.520547184 | 0.606669851 | -0.086122667 | 4  | 231 |
| ALDH1L1-AS2  | 0.517690001 | 0.573749368 | -0.056059367 | 21 | 232 |
| DEFB104A     | 0.535418488 | 0.607709825 | -0.072291337 | 1  | 233 |
| SPRR2E       | 0.311703307 | 0.387054496 | -0.075351189 | 3  | 234 |
| SOX11        | 0.397813886 | 0.441753559 | -0.043939673 | 21 | 235 |
| DIAPH2-AS1   | 0.382844294 | 0.441810283 | -0.058965989 | 2  | 236 |
| OR4D5        | 0.536221977 | 0.677359359 | -0.141137382 | 1  | 237 |
| CDH12        | 0.359369704 | 0.406493792 | -0.047124088 | 15 | 238 |
| MAFB         | 0.409298645 | 0.453556431 | -0.044257786 | 9  | 239 |
| MIR519C      | 0.548027816 | 0.618466956 | -0.07043914  | 1  | 240 |
| RPL35        | 0.295803311 | 0.355771493 | -0.059968181 | 3  | 241 |
| USP30-AS1    | 0.067779972 | 0.111108049 | -0.043328076 | 7  | 242 |
| ARHGAP31-AS1 | 0.41066884  | 0.453971879 | -0.043303039 | 5  | 243 |
| MPL          | 0.574475135 | 0.622617573 | -0.048142438 | 11 | 244 |
| KRTAP5-3     | 0.54779983  | 0.611560473 | -0.063760644 | 2  | 245 |
| PTPRQ        | 0.60914392  | 0.675877271 | -0.066733352 | 11 | 246 |

|            |             |             |              |    |     |
|------------|-------------|-------------|--------------|----|-----|
| MC3R       | 0.428849802 | 0.482317939 | -0.053468137 | 6  | 247 |
| SRPX2      | 0.77024526  | 0.700778975 | 0.069466284  | 4  | 248 |
| PVRL3-AS1  | 0.495047606 | 0.544815936 | -0.04976833  | 8  | 249 |
| POLR2K     | 0.253295214 | 0.295977067 | -0.042681853 | 2  | 250 |
| ACSS3      | 0.481426277 | 0.524104328 | -0.042678051 | 32 | 251 |
| CCL8       | 0.759711522 | 0.835377091 | -0.075665569 | 2  | 252 |
| MIR516A1   | 0.181847454 | 0.249920325 | -0.068072871 | 1  | 253 |
| NF1P1      | 0.370794718 | 0.442770126 | -0.071975408 | 3  | 254 |
| AKR1CL1    | 0.59926826  | 0.671249473 | -0.071981213 | 9  | 255 |
| FAM120C    | 0.510645419 | 0.569633988 | -0.058988569 | 7  | 256 |
| PLA2G2D    | 0.692402835 | 0.780581077 | -0.088178242 | 3  | 257 |
| RBM8B      | 0.786456049 | 0.649412935 | 0.137043114  | 1  | 258 |
| ZNF658     | 0.273522024 | 0.35716955  | -0.083647526 | 3  | 259 |
| CADM2-AS1  | 0.450817708 | 0.505277435 | -0.054459726 | 2  | 260 |
| GPX3       | 0.500529629 | 0.542306197 | -0.041776568 | 8  | 261 |
| LINC00899  | 0.858042099 | 0.772358343 | 0.085683755  | 4  | 262 |
| LINC00442  | 0.6423449   | 0.705263958 | -0.062919058 | 2  | 263 |
| PPRC1      | 0.279856653 | 0.321976813 | -0.04212016  | 7  | 264 |
| SUCLA2-AS1 | 0.23194086  | 0.274499604 | -0.042558744 | 8  | 265 |
| SPIN4      | 0.389882789 | 0.469304617 | -0.079421828 | 3  | 266 |
| PLA2G2A    | 0.795686649 | 0.745911079 | 0.049775571  | 4  | 267 |
| PNPLA4     | 0.444095975 | 0.378720719 | 0.065375256  | 13 | 268 |
| C4orf26    | 0.780879738 | 0.845589221 | -0.064709483 | 3  | 269 |
| MIR206     | 0.383301845 | 0.252851298 | 0.130450548  | 1  | 270 |
| TMCC3      | 0.573808221 | 0.61624776  | -0.042439539 | 18 | 271 |
| NPPB       | 0.496025856 | 0.537088857 | -0.041063    | 4  | 272 |
| PRSS58     | 0.743673689 | 0.82881581  | -0.085142121 | 2  | 273 |
| CLCA2      | 0.759137866 | 0.682834258 | 0.076303608  | 3  | 274 |
| BBC3       | 0.338474002 | 0.379360668 | -0.040886666 | 18 | 275 |
| GOLGA6L1   | 0.618642966 | 0.693087781 | -0.074444815 | 1  | 276 |
| ENDOG      | 0.597341651 | 0.64928922  | -0.051947568 | 3  | 277 |
| KCNA4      | 0.463660098 | 0.504455634 | -0.040795536 | 11 | 278 |
| TRPV5      | 0.728818337 | 0.795173485 | -0.066355147 | 2  | 279 |
| KMO        | 0.634481975 | 0.694060136 | -0.059578162 | 4  | 280 |
| NSDHL      | 0.566647391 | 0.607303606 | -0.040656215 | 11 | 281 |
| C10orf67   | 0.294876867 | 0.341075747 | -0.04619888  | 9  | 282 |
| OCRL       | 0.521287192 | 0.56420218  | -0.042914988 | 13 | 283 |
| SLC18A1    | 0.601676049 | 0.642285831 | -0.040609782 | 8  | 284 |
| DNM1P50    | 0.398751655 | 0.532782057 | -0.134030402 | 1  | 285 |
| OR4D6      | 0.806687314 | 0.902159457 | -0.095472143 | 1  | 286 |
| RHO        | 0.815169911 | 0.85844933  | -0.04327942  | 5  | 287 |
| VAMP8      | 0.407185008 | 0.447597337 | -0.040412329 | 16 | 288 |
| BIRC8      | 0.709394549 | 0.662484995 | 0.046909554  | 5  | 289 |
| KRTAP1-3   | 0.783952173 | 0.88561266  | -0.101660487 | 1  | 290 |
| SLAMF9     | 0.733581559 | 0.693243857 | 0.040337702  | 4  | 291 |
| ZNF597     | 0.611742957 | 0.665626381 | -0.053883424 | 8  | 292 |
| SSX5       | 0.742755509 | 0.680733056 | 0.062022453  | 3  | 293 |
| DSG3       | 0.7402548   | 0.66266242  | 0.07759238   | 1  | 294 |
| ZNF675     | 0.185642227 | 0.225760244 | -0.040118017 | 2  | 295 |
| MIR3678    | 0.181013651 | 0.303421423 | -0.122407772 | 1  | 296 |

|             |             |             |              |    |     |
|-------------|-------------|-------------|--------------|----|-----|
| ENOPH1      | 0.353222873 | 0.406310955 | -0.053088082 | 8  | 297 |
| ANKRD20A12P | 0.536824544 | 0.600756471 | -0.063931926 | 1  | 298 |
| GPR183      | 0.659712158 | 0.699612663 | -0.039900504 | 3  | 299 |
| OR56A4      | 0.15052527  | 0.190424455 | -0.039899185 | 1  | 300 |
| STRADBP1    | 0.618522646 | 0.699097284 | -0.080574638 | 2  | 301 |
| HCRTR2      | 0.466560341 | 0.508260183 | -0.041699842 | 10 | 302 |
| CEACAM3     | 0.673046791 | 0.76523615  | -0.092189359 | 2  | 303 |
| OR4F5       | 0.631094079 | 0.704142746 | -0.073048667 | 1  | 304 |
| UQCR10      | 0.364165107 | 0.403891087 | -0.03972598  | 3  | 305 |
| KIF4A       | 0.425801434 | 0.470218293 | -0.044416859 | 5  | 306 |
| PLSCR5      | 0.420171082 | 0.470258695 | -0.050087613 | 2  | 307 |
| PRR21       | 0.734227229 | 0.818692471 | -0.084465242 | 1  | 308 |
| ZNF619      | 0.467897022 | 0.508572727 | -0.040675705 | 8  | 309 |
| TMEM202     | 0.709623323 | 0.755521608 | -0.045898284 | 3  | 310 |
| TMEM248     | 0.380856669 | 0.445444953 | -0.064588284 | 8  | 311 |
| CD99L2      | 0.37674444  | 0.416229122 | -0.039484683 | 9  | 312 |
| PSG7        | 0.40934747  | 0.456809424 | -0.047461953 | 1  | 313 |
| OR2AJ1      | 0.68689128  | 0.638453711 | 0.048437569  | 2  | 314 |
| PTH2        | 0.366912842 | 0.406296446 | -0.039383604 | 6  | 315 |
| F2RL2       | 0.616232726 | 0.662707233 | -0.046474507 | 4  | 316 |
| MIR519B     | 0.537895771 | 0.599437828 | -0.061542057 | 1  | 317 |
| RNASE6      | 0.645825714 | 0.710266452 | -0.064440738 | 3  | 318 |
| OR2W5       | 0.781080476 | 0.929005385 | -0.147924909 | 1  | 319 |
| MIR522      | 0.483317937 | 0.629341688 | -0.146023751 | 1  | 320 |
| AKR1C2      | 0.609334265 | 0.67391628  | -0.064582015 | 5  | 321 |
| MAGEC1      | 0.424878869 | 0.464467691 | -0.039588822 | 4  | 322 |
| HOTAIRM1    | 0.202848528 | 0.249941923 | -0.047093395 | 18 | 323 |
| IGHEP2      | 0.892567681 | 0.80202891  | 0.090538772  | 1  | 324 |
| ECM2        | 0.568164078 | 0.626150277 | -0.057986199 | 4  | 325 |
| OR10G7      | 0.39512658  | 0.513105142 | -0.117978562 | 1  | 326 |
| DCAF16      | 0.258789028 | 0.297627886 | -0.038838857 | 7  | 327 |
| ALOX12P2    | 0.870896154 | 0.802031483 | 0.068864671  | 15 | 328 |
| SEPHS1      | 0.587632768 | 0.635129699 | -0.047496931 | 12 | 329 |
| ACKR4       | 0.67026073  | 0.779432789 | -0.109172059 | 2  | 330 |
| ERP27       | 0.720815417 | 0.770940125 | -0.050124708 | 6  | 331 |
| RGS18       | 0.404857111 | 0.453350911 | -0.0484938   | 2  | 332 |
| SDR16C5     | 0.670701232 | 0.718599869 | -0.047898637 | 10 | 333 |
| LETM1P2     | 0.822288864 | 0.751171136 | 0.071117728  | 4  | 334 |
| ADNP2       | 0.623936026 | 0.688201946 | -0.06426592  | 9  | 335 |
| ACSL4       | 0.417871514 | 0.478377003 | -0.060505489 | 5  | 336 |
| LINC00841   | 0.830760509 | 0.748204251 | 0.082556258  | 1  | 337 |
| PFKFB1      | 0.595044008 | 0.652532445 | -0.057488436 | 11 | 338 |
| HIST1H2AI   | 0.290981254 | 0.329098503 | -0.03811725  | 4  | 339 |
| KRTAP12-2   | 0.576696874 | 0.519428825 | 0.057268049  | 1  | 340 |
| MT1JP       | 0.850590861 | 0.768394763 | 0.082196098  | 3  | 341 |
| MIR196A2    | 0.392542562 | 0.469538254 | -0.076995692 | 2  | 342 |
| CLUU1OS     | 0.745108206 | 0.821366553 | -0.076258347 | 7  | 343 |
| CCL2        | 0.585987959 | 0.652835814 | -0.066847855 | 3  | 344 |
| GABRG3      | 0.581660986 | 0.645493315 | -0.063832329 | 31 | 345 |
| DUSP9       | 0.567547444 | 0.613905518 | -0.046358074 | 19 | 346 |

|            |             |             |              |    |     |
|------------|-------------|-------------|--------------|----|-----|
| SIRPD      | 0.572121888 | 0.609997209 | -0.037875321 | 5  | 347 |
| PRAMEF6    | 0.520209575 | 0.579466221 | -0.059256645 | 4  | 348 |
| INSL4      | 0.812336778 | 0.738333437 | 0.074003341  | 2  | 349 |
| NOVA1-AS1  | 0.337835345 | 0.405816181 | -0.067980836 | 9  | 350 |
| OR2W3      | 0.751414371 | 0.684527795 | 0.066886576  | 4  | 351 |
| DUSP26     | 0.627180164 | 0.674729867 | -0.047549703 | 11 | 352 |
| OR4S2      | 0.295539077 | 0.392350061 | -0.096810984 | 1  | 353 |
| MPP1       | 0.488847896 | 0.534372433 | -0.045524537 | 15 | 354 |
| FATE1      | 0.325457529 | 0.36283683  | -0.037379301 | 3  | 355 |
| POTEA      | 0.637624206 | 0.696431379 | -0.058807173 | 3  | 356 |
| SUB1P2     | 0.620222406 | 0.686863421 | -0.066641016 | 1  | 357 |
| OR5H2      | 0.266859535 | 0.384096761 | -0.117237226 | 1  | 358 |
| RPS6KA6    | 0.449149306 | 0.488735114 | -0.039585808 | 3  | 359 |
| OR4K13     | 0.789506427 | 0.873544859 | -0.084038432 | 1  | 360 |
| OR52I2     | 0.592624723 | 0.655808255 | -0.063183533 | 1  | 361 |
| GRM1       | 0.498048822 | 0.554274663 | -0.056225841 | 27 | 362 |
| OR52K2     | 0.671289002 | 0.742681764 | -0.071392762 | 1  | 363 |
| CYP7A1     | 0.619134352 | 0.52864613  | 0.090488222  | 1  | 364 |
| BBS10      | 0.27946302  | 0.189214732 | 0.090248288  | 6  | 365 |
| TIPARP-AS1 | 0.280377561 | 0.349495248 | -0.069117687 | 3  | 366 |
| SOWAHC     | 0.517416082 | 0.557751073 | -0.040334991 | 6  | 367 |
| AKR1C4     | 0.474413919 | 0.544872443 | -0.070458523 | 6  | 368 |
| MAGI2-AS1  | 0.731918469 | 0.661978186 | 0.069940283  | 1  | 369 |
| NLRP8      | 0.359678319 | 0.408072477 | -0.048394157 | 3  | 370 |
| SNORA10    | 0.460292972 | 0.562231006 | -0.101938034 | 2  | 371 |
| TUBB8P9    | 0.477809657 | 0.542452902 | -0.064643246 | 1  | 372 |
| PSG10P     | 0.32351412  | 0.361838744 | -0.038324624 | 1  | 373 |
| THAP11     | 0.124357531 | 0.087971783 | 0.036385748  | 7  | 374 |
| OR5P3      | 0.779777421 | 0.861366626 | -0.081589204 | 1  | 375 |
| MIR1468    | 0.492812135 | 0.545379462 | -0.052567327 | 1  | 376 |
| ACOT2      | 0.363183038 | 0.410779018 | -0.04759598  | 10 | 377 |
| UGT3A1     | 0.521180781 | 0.55735816  | -0.036177378 | 9  | 378 |
| RHOT1P2    | 0.651137259 | 0.589422372 | 0.061714887  | 1  | 379 |
| SEMG1      | 0.403546055 | 0.439680378 | -0.036134323 | 3  | 380 |
| KRTAP20-2  | 0.235916202 | 0.289445211 | -0.053529009 | 1  | 381 |
| CRABP2     | 0.356154978 | 0.392227979 | -0.036073    | 11 | 382 |
| CYP2C8     | 0.940078332 | 0.851944284 | 0.088134048  | 1  | 383 |
| OR2Z1      | 0.422322881 | 0.288112126 | 0.134210754  | 1  | 384 |
| C6orf223   | 0.395805289 | 0.446678675 | -0.050873386 | 7  | 385 |
| LINC00158  | 0.210668283 | 0.28351808  | -0.072849797 | 1  | 386 |
| BATF2      | 0.67223457  | 0.586563532 | 0.085671038  | 4  | 387 |
| IGJ        | 0.782495126 | 0.710025093 | 0.072470034  | 2  | 388 |
| MAOA       | 0.487754368 | 0.412964744 | 0.074789623  | 4  | 389 |
| LINC00968  | 0.517289513 | 0.570783773 | -0.05349426  | 1  | 390 |
| SNORD3D    | 0.161783585 | 0.202076184 | -0.040292599 | 2  | 391 |
| BEST3      | 0.644380387 | 0.680011099 | -0.035630712 | 9  | 392 |
| LCE6A      | 0.411053951 | 0.474081686 | -0.063027735 | 3  | 393 |
| PLXDC2     | 0.363397148 | 0.434721673 | -0.071324525 | 28 | 394 |
| OR8K1      | 0.312537547 | 0.397539368 | -0.085001822 | 2  | 395 |
| HSD17B4    | 0.515158623 | 0.558464076 | -0.043305454 | 24 | 396 |

|             |             |             |               |     |     |
|-------------|-------------|-------------|---------------|-----|-----|
| RLBP1       | 0.832608221 | 0.875006318 | -0.042398097  | 5   | 397 |
| SERPINB11   | 0.401960608 | 0.497303294 | -0.095342686  | 8   | 398 |
| SCARNA13    | 0.172146583 | 0.20755082  | -0.035404237  | 1   | 399 |
| TBC1D21     | 0.598676359 | 0.540536805 | 0.058139554   | 3   | 400 |
| TTPA        | 0.203192707 | 0.284111348 | -0.08091864   | 5   | 401 |
| IL10RB-AS1  | 0.73149031  | 0.696301369 | 0.03518894    | 5   | 402 |
| RIMBP2      | 0.599934036 | 0.641089782 | -0.041155746  | 206 | 403 |
| HHLA1       | 0.470902974 | 0.538711364 | -0.06780839   | 6   | 404 |
| MSC         | 0.588412823 | 0.623487568 | -0.035074745  | 13  | 405 |
| SPATA12     | 0.817378784 | 0.88234273  | -0.064963946  | 5   | 406 |
| FLNA        | 0.553027053 | 0.593551512 | -0.040524459  | 21  | 407 |
| OR10A7      | 0.453344732 | 0.617006849 | -0.163662117  | 1   | 408 |
| CPA3        | 0.660021129 | 0.70766515  | -0.047644021  | 3   | 409 |
| LINC00615   | 0.781193465 | 0.85975942  | -0.078565955  | 1   | 410 |
| ALDH1L1     | 0.604106758 | 0.646161451 | -0.042054692  | 32  | 411 |
| KRTAP1-5    | 0.50685421  | 0.558149943 | -0.051295733  | 1   | 412 |
| LINC00941   | 0.267873592 | 0.302725622 | -0.034852031  | 13  | 413 |
| USP27X      | 0.377423528 | 0.415201876 | -0.037778348  | 4   | 414 |
| MID1        | 0.428918375 | 0.469594112 | -0.040675738  | 21  | 415 |
| OR5AK2      | 0.234688985 | 0.320201414 | -0.085512428  | 1   | 416 |
| OR4X2       | 0.558089881 | 0.383374686 | 0.174715195   | 1   | 417 |
| MIR1306     | 0.758924661 | 0.834618663 | -0.075694001  | 1   | 418 |
| C12orf68    | 0.691910113 | 0.65741391  | 0.034496203   | 7   | 419 |
| MIR517A     | 0.36859812  | 0.419971917 | -0.051373796  | 1   | 420 |
| MORF4L2-AS1 | 0.545449252 | 0.587135589 | -0.041686337  | 5   | 421 |
| ARRB2       | 0.608569227 | 0.553584159 | 0.054985068   | 11  | 422 |
| C6orf164    | 0.618121124 | 0.679469908 | -0.061348784  | 1   | 423 |
| NUP62CL     | 0.599127082 | 0.633576508 | -0.0344449426 | 7   | 424 |
| DEFB119     | 0.274009297 | 0.35667852  | -0.082669223  | 3   | 425 |
| GRIA1       | 0.221384687 | 0.278000031 | -0.056615344  | 12  | 426 |
| MS4A6A      | 0.325667159 | 0.403920213 | -0.078253054  | 9   | 427 |
| FUNDC1      | 0.070508551 | 0.104892225 | -0.034383675  | 2   | 428 |
| ARMCX6      | 0.338133827 | 0.378697555 | -0.040563728  | 5   | 429 |
| OR2T33      | 0.387786961 | 0.426518361 | -0.0387314    | 1   | 430 |
| NANOS2      | 0.855633341 | 0.8120662   | 0.043567141   | 6   | 431 |
| ATP6V1G1P2  | 0.678198175 | 0.744982839 | -0.066784664  | 1   | 432 |
| LGALS9B     | 0.520307606 | 0.473404187 | 0.046903419   | 1   | 433 |
| CRBN        | 0.247502337 | 0.281669246 | -0.03416691   | 6   | 434 |
| MPZL2       | 0.239310163 | 0.273462693 | -0.03415253   | 10  | 435 |
| HYAL4       | 0.677594363 | 0.711709204 | -0.034114841  | 8   | 436 |
| OR3A2       | 0.305426255 | 0.375045042 | -0.069618787  | 2   | 437 |
| LDOC1       | 0.505161461 | 0.541619608 | -0.036458147  | 4   | 438 |
| SEPW1       | 0.431375889 | 0.46541712  | -0.034041231  | 8   | 439 |
| PEX6        | 0.299675621 | 0.342481491 | -0.04280587   | 7   | 440 |
| PSG8        | 0.528874302 | 0.573758218 | -0.044883916  | 8   | 441 |
| MLLT11      | 0.275362483 | 0.30929243  | -0.033929947  | 21  | 442 |
| LINC00525   | 0.427171501 | 0.296143754 | 0.131027747   | 1   | 443 |
| SLC10A2     | 0.198201215 | 0.291809454 | -0.093608239  | 3   | 444 |
| ZBP1        | 0.853588133 | 0.789845692 | 0.063742442   | 3   | 445 |
| FAM83C-AS1  | 0.706983934 | 0.757903427 | -0.050919494  | 2   | 446 |

|             |             |             |              |    |     |
|-------------|-------------|-------------|--------------|----|-----|
| AGAP2-AS1   | 0.630028371 | 0.663726958 | -0.033698587 | 4  | 447 |
| CCR2        | 0.588662252 | 0.55184708  | 0.036815172  | 4  | 448 |
| SNHG6       | 0.435589795 | 0.492897944 | -0.057308148 | 10 | 449 |
| HTATSF1     | 0.480153142 | 0.526423748 | -0.046270606 | 12 | 450 |
| ZNF66       | 0.268521463 | 0.23486394  | 0.033657524  | 1  | 451 |
| KIR2DS4     | 0.28266861  | 0.325790443 | -0.043121833 | 2  | 452 |
| DMD-AS2     | 0.491897559 | 0.525323573 | -0.033426014 | 16 | 453 |
| CYP4F24P    | 0.298212506 | 0.331627604 | -0.033415097 | 6  | 454 |
| KRTAP12-4   | 0.529963233 | 0.581149239 | -0.051186006 | 1  | 455 |
| LINC00395   | 0.706135139 | 0.755673569 | -0.04953843  | 2  | 456 |
| NBPF4       | 0.637462883 | 0.581435774 | 0.056027109  | 1  | 457 |
| CLEC7A      | 0.745550291 | 0.819952469 | -0.074402177 | 3  | 458 |
| PCDHB11     | 0.480882037 | 0.546745738 | -0.065863701 | 7  | 459 |
| OR4F15      | 0.828926124 | 0.908138132 | -0.079212007 | 1  | 460 |
| AMELX       | 0.533401013 | 0.390676011 | 0.142725002  | 1  | 461 |
| ADAL        | 0.37566881  | 0.447868147 | -0.072199336 | 11 | 462 |
| SCML2P1     | 0.830772298 | 0.909653654 | -0.078881356 | 1  | 463 |
| MYH4        | 0.573235468 | 0.622921285 | -0.049685816 | 3  | 464 |
| FAM9A       | 0.896829427 | 0.828038395 | 0.068791031  | 7  | 465 |
| TPTEP1      | 0.59907224  | 0.64378102  | -0.044708779 | 19 | 466 |
| EFCAB6-AS1  | 0.672118499 | 0.735683243 | -0.063564744 | 1  | 467 |
| LINC00928   | 0.795394285 | 0.870400673 | -0.075006387 | 1  | 468 |
| OPN1MW      | 0.640821123 | 0.701414415 | -0.060593292 | 1  | 469 |
| G6PD        | 0.558072819 | 0.604789157 | -0.046716338 | 19 | 470 |
| OR2T27      | 0.459985374 | 0.515989605 | -0.056004231 | 2  | 471 |
| TTLL13      | 0.402617232 | 0.369987512 | 0.03262972   | 4  | 472 |
| FLG2        | 0.761316735 | 0.831080578 | -0.069763843 | 3  | 473 |
| AK3         | 0.291155177 | 0.323629195 | -0.032474018 | 5  | 474 |
| F2RL1       | 0.262953612 | 0.295292474 | -0.032338861 | 13 | 475 |
| APCDD1L-AS1 | 0.827233137 | 0.756819102 | 0.070414035  | 2  | 476 |
| SDC4P       | 0.725687942 | 0.663786077 | 0.061901865  | 1  | 477 |
| CXorf64     | 0.181194454 | 0.244998839 | -0.063804384 | 2  | 478 |
| CT47B1      | 0.634549951 | 0.685137809 | -0.050587858 | 5  | 479 |
| CALR4P      | 0.775283746 | 0.829236572 | -0.053952826 | 5  | 480 |
| PTPRT       | 0.354176518 | 0.38630149  | -0.032124972 | 9  | 481 |
| ATP6AP1     | 0.594936203 | 0.634344442 | -0.039408239 | 9  | 482 |
| CADM3       | 0.307116372 | 0.341087709 | -0.033971338 | 15 | 483 |
| YIPF6       | 0.527458633 | 0.571440759 | -0.043982126 | 13 | 484 |
| MIR4710     | 0.351035927 | 0.399263277 | -0.048227349 | 1  | 485 |
| MIR135A1    | 0.892741924 | 0.817220807 | 0.075521118  | 1  | 486 |
| OLFM4       | 0.846081958 | 0.92330961  | -0.077227652 | 4  | 487 |
| CYSLTR2     | 0.645010818 | 0.697153444 | -0.052142626 | 2  | 488 |
| ZNF208      | 0.350199806 | 0.394017807 | -0.043818001 | 12 | 489 |
| LINC00659   | 0.736536115 | 0.659456222 | 0.077079893  | 1  | 490 |
| KCNMB2      | 0.481026652 | 0.535151031 | -0.054124379 | 21 | 491 |
| CENPVP3     | 0.672642071 | 0.615895896 | 0.056746175  | 1  | 492 |
| PATE4       | 0.257767742 | 0.318746226 | -0.060978484 | 2  | 493 |
| SENP7       | 0.364030979 | 0.415962083 | -0.051931105 | 8  | 494 |
| GLRA4       | 0.689435834 | 0.736930829 | -0.047494995 | 6  | 495 |
| PGR         | 0.401552712 | 0.433388527 | -0.031835815 | 17 | 496 |



|         |             |             |              |   |     |
|---------|-------------|-------------|--------------|---|-----|
| SGCG    | 0.791826438 | 0.836779624 | -0.044953187 | 4 | 497 |
| SNORA70 | 0.70797132  | 0.772860372 | -0.064889052 | 1 | 498 |
| DGAT2L6 | 0.613386783 | 0.672090117 | -0.058703334 | 3 | 499 |
| DNAJC5B | 0.585283823 | 0.646436801 | -0.061152978 | 4 | 500 |

**Supplementary Table S9. List of the 500 top-ranked, differentially methylated CGIs after induced overexpression of TET1 .**

For CGIs overlapping with 2 kb promoter regions, corresponding promoter gene symbols are provided.

| CGI                       | promoter_overlap | beta.TET1+Dox | beta.TET1-Dox | difference   | num.sites | rank |
|---------------------------|------------------|---------------|---------------|--------------|-----------|------|
| chr1:158119489-158119704  |                  | 0.083231257   | 0.266035827   | -0.18280457  | 4         | 1    |
| chr19:15619224-15619613   | CYP4F22          | 0.165546679   | 0.352916775   | -0.187370096 | 3         | 2    |
| chr9:99540026-99540472    | ZNF510           | 0.057398485   | 0.196285722   | -0.138887237 | 3         | 3    |
| chr2:88650248-88650686    |                  | 0.258580389   | 0.426194027   | -0.167613638 | 4         | 4    |
| chr3:72788073-72788416    |                  | 0.239107279   | 0.444377539   | -0.205270261 | 3         | 5    |
| chr20:4152867-4153398     |                  | 0.106261466   | 0.241809836   | -0.135548371 | 3         | 6    |
| chr9:112262011-112262317  | PTPN3            | 0.263175696   | 0.474672877   | -0.211497181 | 1         | 7    |
| chr16:67208068-67208678   |                  | 0.31323473    | 0.435778555   | -0.122543825 | 3         | 8    |
| chr3:125898663-125899568  | ALDH1L1-AS2      | 0.087088685   | 0.246835842   | -0.159747157 | 9         | 9    |
| chr12:186864-187610       |                  | 0.400301438   | 0.539151779   | -0.138850341 | 3         | 10   |
| chr8:37557928-37558887    |                  | 0.195238965   | 0.344873549   | -0.149634583 | 2         | 11   |
| chr12:132990778-132990987 |                  | 0.208831816   | 0.363535841   | -0.154704025 | 3         | 12   |
| chr1:45082740-45083285    |                  | 0.321843876   | 0.502992355   | -0.181148479 | 6         | 13   |
| chr16:4363936-4364151     | GLIS2            | 0.14092594    | 0.251360407   | -0.110434468 | 3         | 14   |
| chr11:47615711-47616055   | C1QTNF4          | 0.173370704   | 0.377760502   | -0.204389798 | 1         | 15   |
| chr7:19145873-19146256    |                  | 0.150071951   | 0.372057135   | -0.221985185 | 2         | 16   |
| chr12:98850691-98851002   | SLC9A7P1         | 0.116047161   | 0.241776758   | -0.125729597 | 4         | 17   |
| chr4:8594413-8594777      | CPZ              | 0.258169775   | 0.398254677   | -0.140084903 | 4         | 18   |
| chr19:18319146-18319363   |                  | 0.138805497   | 0.244914913   | -0.106109417 | 2         | 19   |
| chr5:72746990-72747587    |                  | 0.314632117   | 0.429370621   | -0.114738504 | 3         | 20   |
| chr19:15662114-15662358   |                  | 0.227209994   | 0.328967577   | -0.101757583 | 2         | 21   |
| chr17:60885409-60885857   | MARCH10          | 0.413090469   | 0.604865998   | -0.191775528 | 4         | 22   |
| chrX:129118346-129118690  |                  | 0.177589113   | 0.363192929   | -0.185603816 | 1         | 23   |
| chr7:100253783-100254150  | ACTL6B           | 0.360889263   | 0.489823234   | -0.128933971 | 5         | 24   |
| chr9:77111779-77112042    | RORB             | 0.171967229   | 0.266203405   | -0.094236176 | 1         | 25   |
| chr9:16828936-16829169    |                  | 0.183215258   | 0.381984702   | -0.198769444 | 1         | 26   |
| chr5:139076543-139077179  |                  | 0.202190646   | 0.297694396   | -0.09550375  | 5         | 27   |
| chr6:73972820-73973027    |                  | 0.058056631   | 0.176190202   | -0.118133571 | 3         | 28   |
| chr19:3687787-3688262     |                  | 0.287700849   | 0.164730195   | 0.122970654  | 4         | 29   |
| chr18:77905298-77905566   |                  | 0.385183209   | 0.528703148   | -0.143519939 | 5         | 30   |
| chr4:74719088-74719339    | PF4V1            | 0.329761906   | 0.50218856    | -0.172426654 | 3         | 31   |
| chr9:71650647-71651176    | FXN              | 0.072242007   | 0.16402858    | -0.091786573 | 2         | 32   |
| chr10:112431836-112432426 |                  | 0.183934701   | 0.272102573   | -0.088167872 | 7         | 33   |
| chr7:1265112-1265379      |                  | 0.122597066   | 0.232472743   | -0.109875677 | 3         | 34   |
| chr12:109729573-109729826 |                  | 0.303954679   | 0.42912124    | -0.125166561 | 3         | 35   |
| chr7:150652808-150653080  |                  | 0.433954052   | 0.518967285   | -0.085013233 | 5         | 36   |
| chr19:41732007-41732556   |                  | 0.13308835    | 0.227159268   | -0.094070918 | 3         | 37   |
| chr10:133058339-133058609 |                  | 0.29893558    | 0.405565443   | -0.106629863 | 2         | 38   |
| chr13:113656117-113656379 |                  | 0.283157134   | 0.392325158   | -0.109168023 | 2         | 39   |
| chr1:27286066-27287101    | C1orf172         | 0.189491181   | 0.312946393   | -0.123455212 | 6         | 40   |
| chr7:157690560-157690770  |                  | 0.431724584   | 0.537017146   | -0.105292561 | 4         | 41   |
| chr19:31210518-31210884   |                  | 0.20950321    | 0.291776521   | -0.082273311 | 3         | 42   |
| chr12:131303094-131303836 |                  | 0.173767293   | 0.284457887   | -0.110690594 | 7         | 43   |
| chr17:34997844-34998760   |                  | 0.076449118   | 0.15784926    | -0.081400142 | 2         | 44   |
| chr14:74100344-74101230   |                  | 0.232718561   | 0.325841814   | -0.093123252 | 4         | 45   |
| chr14:42075859-42076329   | LRFN5            | 0.14457537    | 0.271883055   | -0.127307685 | 2         | 46   |
| chr2:242549374-242549995  |                  | 0.176253851   | 0.25556502    | -0.079311169 | 4         | 47   |
| chrX:101397306-101397514  | TCEAL6           | 0.249608118   | 0.336427747   | -0.086819629 | 1         | 48   |
| chr12:56039989-56040337   |                  | 0.208683548   | 0.313736692   | -0.105053144 | 5         | 49   |
| chr21:42792294-42792704   | MX1              | 0.208701646   | 0.32051079    | -0.111809145 | 5         | 50   |
| chr1:116961183-116961542  | ATP1A1OS         | 0.070156835   | 0.146581995   | -0.076425161 | 7         | 51   |
| chr8:72755784-72756667    | MSC              | 0.221311369   | 0.313174216   | -0.091862847 | 6         | 52   |
| chr9:127212625-127213064  | GPR144           | 0.06625163    | 0.145397006   | -0.079145377 | 1         | 53   |
| chr9:32572997-32573227    | NDUFB6           | 0.07266985    | 0.147935283   | -0.075265433 | 1         | 54   |
| chr10:20106644-20106946   |                  | 0.128640472   | 0.238486063   | -0.109845591 | 3         | 55   |
| chr1:43814306-43815277    |                  | 0.274371037   | 0.367128258   | -0.092757221 | 5         | 56   |
| chr4:155547985-155548322  | LRAT             | 0.289842796   | 0.39142277    | -0.101579974 | 5         | 57   |
| chr10:49348138-49348676   |                  | 0.32913971    | 0.535995281   | -0.206855571 | 1         | 58   |
| chr19:55450823-55451128   |                  | 0.827913353   | 0.627832545   | 0.200080807  | 1         | 59   |
| chr19:47733885-47734806   |                  | 0.087577334   | 0.194006492   | -0.106429158 | 5         | 60   |
| chr18:712233-713086       | ENOSF1           | 0.275123726   | 0.349005622   | -0.073881896 | 6         | 61   |
| chr19:2613933-2614133     |                  | 0.151279051   | 0.260485356   | -0.109206305 | 3         | 62   |

|                           |                 |             |             |              |    |     |
|---------------------------|-----------------|-------------|-------------|--------------|----|-----|
| chr2:220222903-220223854  |                 | 0.302858409 | 0.375662287 | -0.072803878 | 5  | 63  |
| chr16:32252570-32252823   |                 | 0.530213596 | 0.692413168 | -0.162199572 | 1  | 64  |
| chr11:30040073-30040294   |                 | 0.75994458  | 0.582077891 | 0.177866688  | 2  | 65  |
| chr22:17090456-17091224   |                 | 0.429053164 | 0.541608716 | -0.112555552 | 4  | 66  |
| chr16:29093366-29093833   |                 | 0.076665797 | 0.156252687 | -0.07958689  | 1  | 67  |
| chr7:149469543-149469748  |                 | 0.179814275 | 0.250298784 | -0.070484509 | 1  | 68  |
| chr12:105478090-105478517 | ALDH1L2         | 0.511814154 | 0.643220169 | -0.131406015 | 7  | 69  |
| chrX:154493304-154493907  | RAB39B          | 0.390252183 | 0.489136649 | -0.098884465 | 4  | 70  |
| chr10:31422710-31423316   |                 | 0.417412862 | 0.541521967 | -0.124109105 | 3  | 71  |
| chr16:24267041-24267527   | CACNG3          | 0.12329438  | 0.198536397 | -0.075242017 | 3  | 72  |
| chr20:62947649-62948464   |                 | 0.087877352 | 0.179149916 | -0.091272564 | 3  | 73  |
| chr9:129677707-129678009  |                 | 0.171626484 | 0.240156164 | -0.06852968  | 2  | 74  |
| chr11:132952539-132953307 |                 | 0.124149424 | 0.223827107 | -0.099677684 | 2  | 75  |
| chr17:14200580-14200996   |                 | 0.416190735 | 0.484131252 | -0.067940517 | 2  | 76  |
| chr14:24020003-24020251   |                 | 0.307096299 | 0.411948781 | -0.104852482 | 3  | 77  |
| chr19:54369388-54369809   | MYADM           | 0.455204585 | 0.522592706 | -0.06738812  | 8  | 78  |
| chr15:85291080-85291697   | ZNF592          | 0.115069278 | 0.193685146 | -0.078615868 | 3  | 79  |
| chr9:35111268-35111504    |                 | 0.149083957 | 0.216414274 | -0.067330317 | 1  | 80  |
| chr13:111719705-111720014 |                 | 0.368831937 | 0.467609887 | -0.09877795  | 3  | 81  |
| chr14:71288404-71288957   |                 | 0.080048791 | 0.147358548 | -0.067309756 | 2  | 82  |
| chr6:55039171-55039392    | HCRTR2          | 0.079446285 | 0.147668657 | -0.068222372 | 4  | 83  |
| chrX:34148741-34148957    |                 | 0.506156856 | 0.622894643 | -0.116737787 | 2  | 84  |
| chr2:102758807-102759577  |                 | 0.626507029 | 0.515093975 | 0.111413054  | 3  | 85  |
| chr11:58873890-58874486   | FAM111B         | 0.106141516 | 0.174567816 | -0.068426299 | 3  | 86  |
| chr17:35014273-35014596   |                 | 0.046234956 | 0.120812754 | -0.074577798 | 3  | 87  |
| chr12:54811982-54812202   |                 | 0.474306653 | 0.604253639 | -0.129946986 | 2  | 88  |
| chr16:55542921-55543274   | LPCAT2          | 0.060905817 | 0.149465381 | -0.088559564 | 5  | 89  |
| chr1:50798668-50799536    |                 | 0.056353316 | 0.121282125 | -0.064928809 | 5  | 90  |
| chr19:46119455-46119815   |                 | 0.1880379   | 0.313143817 | -0.125105917 | 2  | 91  |
| chr13:88326601-88326919   |                 | 0.568242325 | 0.441558888 | 0.126683437  | 3  | 92  |
| chr13:108518335-108518633 | FAM155A         | 0.176461309 | 0.112604507 | 0.063856803  | 3  | 93  |
| chr8:121137100-121137778  |                 | 0.181024047 | 0.244850785 | -0.063826739 | 4  | 94  |
| chr14:72398665-72399554   | RGS6            | 0.217317601 | 0.12578557  | 0.091532031  | 4  | 95  |
| chr6:167275721-167276626  |                 | 0.219647082 | 0.295924366 | -0.076277284 | 12 | 96  |
| chr10:74079337-74079861   |                 | 0.145554531 | 0.208051535 | -0.062497004 | 4  | 97  |
| chr14:85996495-85996958   | FLRT2           | 0.339643353 | 0.24768681  | 0.091956543  | 4  | 98  |
| chrX:103809795-103810167  | IL1RAPL2        | 0.69960913  | 0.623073764 | 0.076535366  | 3  | 99  |
| chr20:25058289-25058726   |                 | 0.370442323 | 0.538676119 | -0.168233796 | 2  | 100 |
| chr16:75550614-75551426   |                 | 0.095186043 | 0.164179305 | -0.068993263 | 3  | 101 |
| chr1:85358360-85359187    | LPAR3           | 0.12968887  | 0.189982852 | -0.060293982 | 6  | 102 |
| chr5:41869664-41870876    | OXCT1;OXCT1-AS1 | 0.269529422 | 0.368284204 | -0.098754782 | 10 | 103 |
| chr8:33456916-33457515    | DUSP26          | 0.460878488 | 0.559418338 | -0.098539849 | 6  | 104 |
| chr17:46697414-46697701   |                 | 0.427710936 | 0.542249734 | -0.114538798 | 3  | 105 |
| chr4:3464800-3465440      | DOK7            | 0.397006168 | 0.483601637 | -0.086595468 | 8  | 106 |
| chr17:46619088-46619314   |                 | 0.085464266 | 0.219132203 | -0.133667936 | 2  | 107 |
| chr20:39316040-39316322   |                 | 0.550858118 | 0.661624522 | -0.110766404 | 3  | 108 |
| chrX:153569548-153571439  |                 | 0.345497136 | 0.429611817 | -0.084114681 | 1  | 109 |
| chr1:15929824-15930289    | CHCHD2P6        | 0.044262682 | 0.113141225 | -0.068878543 | 4  | 110 |
| chrX:51138954-51139255    |                 | 0.269306525 | 0.371006494 | -0.101699969 | 4  | 111 |
| chr19:53757820-53758148   | ZNF677          | 0.364580976 | 0.306093401 | 0.058487576  | 3  | 112 |
| chr7:150942305-150943033  |                 | 0.205210092 | 0.303651044 | -0.098440953 | 3  | 113 |
| chr19:58175624-58176104   |                 | 0.101819118 | 0.168739869 | -0.066920752 | 3  | 114 |
| chr3:11195902-11196552    |                 | 0.388221251 | 0.447926907 | -0.059705656 | 2  | 115 |
| chr19:51568155-51568412   | KLK13           | 0.286711711 | 0.377705585 | -0.090993874 | 3  | 116 |
| chr11:8289533-8290322     | LMO1            | 0.313681724 | 0.379591799 | -0.065910076 | 5  | 117 |
| chr11:111410933-111412199 | LAYN            | 0.480506034 | 0.537771278 | -0.057265244 | 11 | 118 |
| chr1:244213398-244213619  | ZBTB18          | 0.219847228 | 0.293176581 | -0.073329352 | 4  | 119 |
| chr10:103535637-103536505 | FGF8            | 0.609857389 | 0.677484234 | -0.067626845 | 5  | 120 |
| chr1:110185962-110186164  |                 | 0.133203766 | 0.189054217 | -0.055850451 | 4  | 121 |
| chr4:134071663-134073628  |                 | 0.363454447 | 0.419117733 | -0.055663286 | 5  | 122 |
| chr9:120507228-120507642  |                 | 0.568190501 | 0.419185181 | 0.14900532   | 2  | 123 |
| chr15:78236689-78237084   |                 | 0.136575074 | 0.192236062 | -0.055660988 | 3  | 124 |
| chr9:137217063-137218078  |                 | 0.105942014 | 0.181737523 | -0.075795509 | 2  | 125 |
| chr8:1949246-1951390      |                 | 0.532473478 | 0.477702523 | 0.054770955  | 7  | 126 |
| chrX:149736721-149737756  | MTM1            | 0.415758429 | 0.493323351 | -0.077564922 | 8  | 127 |

|                           |                       |             |             |              |    |     |
|---------------------------|-----------------------|-------------|-------------|--------------|----|-----|
| chr12:118499104-118499473 |                       | 0.425691407 | 0.348740892 | 0.076950515  | 1  | 128 |
| chr9:707022-707420        |                       | 0.07858401  | 0.132325974 | -0.053741963 | 3  | 129 |
| chr16:34295487-34296109   |                       | 0.377113517 | 0.43046597  | -0.053352453 | 3  | 130 |
| chr9:138156711-138156983  |                       | 0.882406975 | 0.726715518 | 0.155691457  | 1  | 131 |
| chr5:139492724-139492966  |                       | 0.153685746 | 0.214948631 | -0.061262885 | 2  | 132 |
| chr12:113772634-113772934 |                       | 0.123285202 | 0.195587893 | -0.07230269  | 3  | 133 |
| chr1:201708788-201709429  |                       | 0.316267154 | 0.368267212 | -0.052000058 | 7  | 134 |
| chr19:9517469-9517986     |                       | 0.449457664 | 0.371329923 | 0.078127741  | 3  | 135 |
| chr9:117160140-117161064  |                       | 0.1563382   | 0.209797333 | -0.053459133 | 2  | 136 |
| chr14:105332409-105332651 |                       | 0.215615814 | 0.287445154 | -0.07182934  | 3  | 137 |
| chr12:125534061-125534527 |                       | 0.155473599 | 0.20688085  | -0.05140725  | 2  | 138 |
| chr18:47087076-47087446   | LIPG                  | 0.225299632 | 0.280736084 | -0.055436452 | 3  | 139 |
| chr8:104152727-104153390  | BAALC;C8orf56         | 0.387864269 | 0.46948864  | -0.081624371 | 4  | 140 |
| chr9:127539240-127540081  | OLFML2A               | 0.598971774 | 0.51417577  | 0.084796004  | 4  | 141 |
| chr11:131560938-131561613 |                       | 0.704443369 | 0.770086829 | -0.06564346  | 3  | 142 |
| chr19:42416993-42417513   |                       | 0.286974724 | 0.370337302 | -0.083362578 | 3  | 143 |
| chr5:52777789-52777996    |                       | 0.121728969 | 0.201831578 | -0.080102609 | 2  | 144 |
| chr16:88803803-88804112   |                       | 0.088260215 | 0.138733849 | -0.050473634 | 4  | 145 |
| chr3:187455331-187455843  |                       | 0.257818672 | 0.308256605 | -0.050437933 | 4  | 146 |
| chr8:1495106-1495333      |                       | 0.629841384 | 0.725667827 | -0.095826443 | 4  | 147 |
| chr10:135450884-135451867 | RARRES2P2             | 0.295120557 | 0.35462059  | -0.059500033 | 1  | 148 |
| chr13:112063570-112064022 |                       | 0.188871874 | 0.273336648 | -0.084464774 | 2  | 149 |
| chr3:38179858-38180689    | ACAA1;MYD88           | 0.454485186 | 0.573673809 | -0.119188623 | 10 | 150 |
| chr8:1327332-1327547      |                       | 0.661256918 | 0.750202045 | -0.088945127 | 4  | 151 |
| chr19:49522774-49523093   |                       | 0.392482724 | 0.330977296 | 0.061505428  | 3  | 152 |
| chr17:20811749-20812158   |                       | 0.247857231 | 0.368263231 | -0.120406    | 4  | 153 |
| chr4:2305515-2305793      |                       | 0.167582553 | 0.258512759 | -0.090930205 | 1  | 154 |
| chr3:6904134-6904641      |                       | 0.319429036 | 0.384647783 | -0.065218747 | 4  | 155 |
| chr6:161352085-161352386  |                       | 0.504251571 | 0.591513152 | -0.087261582 | 2  | 156 |
| chr21:46897842-46898158   |                       | 0.124456512 | 0.174123823 | -0.049667311 | 2  | 157 |
| chr2:223183014-223185468  |                       | 0.157697134 | 0.208085771 | -0.050388637 | 7  | 158 |
| chr21:40032244-40033665   | ERG                   | 0.43434343  | 0.495268673 | -0.060925243 | 4  | 159 |
| chr12:119212111-119212393 |                       | 0.636369136 | 0.567001526 | 0.06936761   | 4  | 160 |
| chr9:41954479-41954842    |                       | 0.283315727 | 0.33901296  | -0.055697233 | 1  | 161 |
| chr20:10152769-10153193   |                       | 0.194696315 | 0.14549643  | 0.049199885  | 3  | 162 |
| chr6:27833121-27833406    | HIST1H2AL;HIST1H2BPS2 | 0.491216466 | 0.587251818 | -0.096035352 | 4  | 163 |
| chr5:2643106-2643309      |                       | 0.343063372 | 0.410374179 | -0.067310807 | 3  | 164 |
| chr17:37380954-37382363   | STAC2                 | 0.410644986 | 0.458860169 | -0.048215183 | 10 | 165 |
| chr12:49735720-49736875   |                       | 0.570901161 | 0.654514839 | -0.083613678 | 4  | 166 |
| chr8:65491084-65491319    | BHLHE22               | 0.71824629  | 0.612574091 | 0.1056722    | 3  | 167 |
| chr19:42501262-42501486   | ATP1A3                | 0.135328605 | 0.193110878 | -0.057782272 | 2  | 168 |
| chr19:11353961-11354362   |                       | 0.206753693 | 0.254500095 | -0.047746402 | 4  | 169 |
| chr1:32713919-32714186    |                       | 0.371190997 | 0.424385942 | -0.053194945 | 4  | 170 |
| chr19:40376868-40377136   |                       | 0.601118589 | 0.735430021 | -0.134311432 | 1  | 171 |
| chrX:39021663-39022131    |                       | 0.654402341 | 0.553889346 | 0.100512996  | 1  | 172 |
| chrX:54208940-54209723    | FAM120C               | 0.461319259 | 0.543734728 | -0.082415469 | 6  | 173 |
| chr1:17746201-17746547    |                       | 0.510784577 | 0.557802569 | -0.047017992 | 5  | 174 |
| chr6:170921394-170921775  |                       | 0.26867543  | 0.221696093 | 0.046979337  | 1  | 175 |
| chr6:154360587-154361008  |                       | 0.351871161 | 0.41161459  | -0.059743429 | 4  | 176 |
| chr19:51843076-51843926   |                       | 0.335617341 | 0.229142858 | 0.106474483  | 2  | 177 |
| chr11:47376652-47377236   |                       | 0.308954286 | 0.381986122 | -0.073031835 | 3  | 178 |
| chr9:131965038-131965636  |                       | 0.281991537 | 0.2132102   | 0.068781336  | 4  | 179 |
| chr9:114361411-114361760  | PTGR1                 | 0.251395894 | 0.387879648 | -0.136483755 | 1  | 180 |
| chr1:27854417-27854963    |                       | 0.183229353 | 0.136674052 | 0.0465553    | 4  | 181 |
| chr11:49071438-49071764   |                       | 0.834502146 | 0.719256812 | 0.115245334  | 2  | 182 |
| chr16:7568196-7568413     |                       | 0.666834599 | 0.756834128 | -0.089999529 | 2  | 183 |
| chr19:42497820-42498560   |                       | 0.162161247 | 0.208412916 | -0.046251669 | 3  | 184 |
| chrY:6134499-6134748      | TSPY11P               | 0.208383156 | 0.257553544 | -0.049170388 | 1  | 185 |
| chr9:98273679-98273908    |                       | 0.080915911 | 0.126786233 | -0.045870321 | 1  | 186 |
| chr2:11924984-11925253    |                       | 0.453858439 | 0.505836991 | -0.051978552 | 3  | 187 |
| chr9:68726057-68726939    |                       | 0.289773257 | 0.354112594 | -0.064339337 | 1  | 188 |
| chr11:64611715-64612634   | CDC42BPG              | 0.129478667 | 0.184396605 | -0.054917938 | 5  | 189 |
| chr2:231902027-231903122  | C2orf72               | 0.510585742 | 0.426393678 | 0.084192064  | 3  | 190 |
| chrX:136629545-136630303  |                       | 0.480330514 | 0.527126912 | -0.046796398 | 5  | 191 |
| chr7:138666359-138666972  | KIAA1549              | 0.302695218 | 0.397387429 | -0.094692211 | 2  | 192 |

|                           |              |             |             |              |    |     |
|---------------------------|--------------|-------------|-------------|--------------|----|-----|
| chr4:113445023-113445350  |              | 0.093293643 | 0.224326747 | -0.131033105 | 2  | 193 |
| chr16:3493099-3493569     | NAA60;ZNF597 | 0.504377529 | 0.58435585  | -0.079978321 | 6  | 194 |
| chr7:6676455-6676785      | ZNF316       | 0.081343113 | 0.138080344 | -0.056737231 | 2  | 195 |
| chr21:28515803-28516306   | GPX1P2       | 0.424179201 | 0.506073885 | -0.081894684 | 3  | 196 |
| chr11:44971049-44972685   | TP53I11      | 0.25007386  | 0.307241665 | -0.057167804 | 11 | 197 |
| chr3:87101768-87102008    | PPATP1       | 0.348477253 | 0.408817766 | -0.060340513 | 2  | 198 |
| chr2:229045958-229046553  | SPHKAP       | 0.262292619 | 0.320445349 | -0.05815273  | 5  | 199 |
| chr7:157612037-157612316  |              | 0.740968077 | 0.849095357 | -0.10812728  | 2  | 200 |
| chr14:107221093-107221298 |              | 0.727423318 | 0.849295885 | -0.121872567 | 2  | 201 |
| chr1:37783612-37784258    |              | 0.601655216 | 0.649386359 | -0.047731143 | 4  | 202 |
| chr4:57975861-57976916    | IGFBP7       | 0.201570666 | 0.283743635 | -0.082172969 | 9  | 203 |
| chr19:49298406-49298745   |              | 0.163922505 | 0.0953555   | 0.068567005  | 4  | 204 |
| chr16:1393574-1393878     |              | 0.684970994 | 0.788328978 | -0.103357985 | 3  | 205 |
| chr22:45064160-45065092   | PRR5         | 0.313691527 | 0.222285982 | 0.091405545  | 5  | 206 |
| chr7:5322681-5323193      |              | 0.659192763 | 0.568201444 | 0.090991319  | 2  | 207 |
| chr4:169401351-169401725  |              | 0.087335801 | 0.142109302 | -0.054773501 | 6  | 208 |
| chr20:10198136-10198984   | SNAP25       | 0.290967874 | 0.357805853 | -0.066837978 | 3  | 209 |
| chr19:48896891-48897199   | GRIN2D       | 0.049576153 | 0.09334316  | -0.043767007 | 5  | 210 |
| chr3:39851026-39851820    |              | 0.130767778 | 0.206370395 | -0.075602617 | 4  | 211 |
| chr16:31580560-31581023   | YBX3P1       | 0.637491758 | 0.580281373 | 0.057210384  | 5  | 212 |
| chr11:2154034-2154387     |              | 0.693468067 | 0.634679474 | 0.058788593  | 5  | 213 |
| chr1:149605515-149605903  | RNVU1-20     | 0.239121685 | 0.350729923 | -0.111608239 | 1  | 214 |
| chr18:76693918-76694195   |              | 0.757706316 | 0.844440047 | -0.086733731 | 3  | 215 |
| chr20:53091734-53092993   | DOK5         | 0.309919479 | 0.250505346 | 0.059414133  | 10 | 216 |
| chr7:63498113-63498314    |              | 0.403830631 | 0.447074435 | -0.043243804 | 4  | 217 |
| chr10:133318029-133318324 |              | 0.53429014  | 0.606439666 | -0.072149527 | 3  | 218 |
| chr2:79220193-79220592    |              | 0.472360002 | 0.534480277 | -0.062120275 | 4  | 219 |
| chr2:162270889-162271413  | TBR1         | 0.228046188 | 0.287358349 | -0.059312161 | 3  | 220 |
| chr14:92979727-92981228   | RIN3         | 0.404452546 | 0.447575737 | -0.043123191 | 8  | 221 |
| chr12:128899814-128900065 |              | 0.560954392 | 0.486651561 | 0.074302831  | 3  | 222 |
| chr20:61937483-61937738   |              | 0.766719232 | 0.888534941 | -0.121815709 | 2  | 223 |
| chr2:45161428-45163058    |              | 0.699201659 | 0.628515741 | 0.070685918  | 5  | 224 |
| chr3:26664105-26664796    | LRRC3B       | 0.308625745 | 0.364232434 | -0.055606689 | 7  | 225 |
| chr12:13154089-13154866   | HEBP1        | 0.341074019 | 0.423120696 | -0.082046677 | 6  | 226 |
| chr19:58666024-58666833   | ZNF329       | 0.276134241 | 0.33436387  | -0.058229629 | 4  | 227 |
| chr2:85554135-85555414    | TGOLN2       | 0.059777768 | 0.111688422 | -0.051910654 | 6  | 228 |
| chr4:170948487-170948908  |              | 0.224952419 | 0.15228856  | 0.072663859  | 4  | 229 |
| chr19:55865825-55866324   | COX6B2       | 0.461052414 | 0.547565652 | -0.086513238 | 7  | 230 |
| chr1:7740144-7741117      |              | 0.368587243 | 0.31578629  | 0.052800952  | 7  | 231 |
| chr9:71394794-71395492    | FAM122A      | 0.107691327 | 0.150027325 | -0.042335998 | 5  | 232 |
| chr12:76741910-76742286   | BBS10        | 0.209914991 | 0.089946095 | 0.119968897  | 5  | 233 |
| chrX:152909014-152909214  |              | 0.432842341 | 0.485460431 | -0.052618091 | 3  | 234 |
| chr19:54057415-54058254   |              | 0.699213352 | 0.778246109 | -0.079032757 | 3  | 235 |
| chr11:3224525-3225077     |              | 0.268583633 | 0.319686504 | -0.051102871 | 5  | 236 |
| chr3:123751655-123753199  |              | 0.163514367 | 0.206969613 | -0.043455245 | 7  | 237 |
| chr10:13933483-13934184   |              | 0.446689684 | 0.488664444 | -0.04197476  | 3  | 238 |
| chr3:184016578-184017416  | PSMD2        | 0.079612822 | 0.121579164 | -0.041966342 | 6  | 239 |
| chr18:67069934-67070171   |              | 0.691347222 | 0.640499855 | 0.050847367  | 4  | 240 |
| chr11:13030331-13032584   | RASSF10      | 0.531694021 | 0.631349462 | -0.09965544  | 11 | 241 |
| chr1:5793558-5793784      |              | 0.70178485  | 0.807298645 | -0.105513795 | 1  | 242 |
| chr17:72667196-72667710   | RAB37        | 0.554975709 | 0.483960601 | 0.071015108  | 4  | 243 |
| chr11:8009048-8009251     |              | 0.27724872  | 0.318904734 | -0.041656014 | 2  | 244 |
| chr16:84214836-84215036   |              | 0.908902674 | 0.804726373 | 0.104176301  | 2  | 245 |
| chr20:59598844-59599305   |              | 0.507830981 | 0.549604156 | -0.041773174 | 3  | 246 |
| chr19:46367372-46367808   | FOXA3;SYMPK  | 0.231541692 | 0.31501333  | -0.083471638 | 3  | 247 |
| chrY:14107138-14107480    |              | 0.765878592 | 0.596333359 | 0.169545233  | 1  | 248 |
| chr13:102106166-102106488 |              | 0.280285047 | 0.190449392 | 0.089835655  | 2  | 249 |
| chr16:34777875-34778144   | RARRES2P8    | 0.640769184 | 0.59691563  | 0.043853553  | 3  | 250 |
| chr22:22901387-22901698   | PRAME        | 0.324846644 | 0.454627229 | -0.129780585 | 5  | 251 |
| chr18:59000684-59001692   | CDH20        | 0.359592533 | 0.417527347 | -0.057934814 | 6  | 252 |
| chr12:131200510-131200726 | RIMBP2       | 0.205733707 | 0.15093952  | 0.054794186  | 3  | 253 |
| chr20:61147458-61147787   | C20orf166    | 0.678448343 | 0.612454917 | 0.065993426  | 6  | 254 |
| chr13:28540357-28541279   |              | 0.587370081 | 0.690818858 | -0.103448777 | 2  | 255 |
| chr16:5289583-5290386     |              | 0.474432793 | 0.544013002 | -0.069580209 | 1  | 256 |
| chr19:12476050-12476372   | ZNF442       | 0.29020586  | 0.374740499 | -0.084534639 | 3  | 257 |

|                           |               |             |             |              |    |     |
|---------------------------|---------------|-------------|-------------|--------------|----|-----|
| chr19:22805801-22806721   |               | 0.627463339 | 0.671301779 | -0.04383844  | 5  | 258 |
| chr19:50762343-50762552   |               | 0.845577782 | 0.755312858 | 0.090264924  | 2  | 259 |
| chr8:97657175-97657943    | CPQ           | 0.242506419 | 0.295110542 | -0.052604123 | 12 | 260 |
| chr20:58507756-58509517   | FAM217B;SYCP2 | 0.657330459 | 0.697719158 | -0.040388699 | 8  | 261 |
| chr8:56013657-56015761    | XKR4          | 0.249499232 | 0.209255389 | 0.040243843  | 7  | 262 |
| chr2:70485232-70485679    |               | 0.091531309 | 0.131762803 | -0.040231494 | 3  | 263 |
| chr20:33814546-33815131   | MMP24         | 0.296722003 | 0.339843758 | -0.043121755 | 1  | 264 |
| chr22:30116082-30117160   | CABP7         | 0.407350699 | 0.366626822 | 0.040723877  | 8  | 265 |
| chr6:36410434-36411139    | KCTD20;PXT1   | 0.045180325 | 0.085279927 | -0.040099602 | 12 | 266 |
| chr18:76150399-76151531   |               | 0.67940361  | 0.78097817  | -0.10157456  | 2  | 267 |
| chr14:36977519-36977996   |               | 0.420785667 | 0.475185753 | -0.054400087 | 4  | 268 |
| chr16:1480845-1481045     | C16orf91      | 0.608877759 | 0.529772649 | 0.079105111  | 3  | 269 |
| chr2:139537693-139538650  | NXPH2         | 0.386416764 | 0.426324776 | -0.039908013 | 7  | 270 |
| chr20:54824313-54824584   |               | 0.639341173 | 0.693815901 | -0.054474728 | 3  | 271 |
| chr7:143058918-143060156  | FAM131B       | 0.225354644 | 0.2651155   | -0.039760856 | 12 | 272 |
| chr6:13873766-13874262    |               | 0.599314334 | 0.528079072 | 0.071235262  | 4  | 273 |
| chr18:56934834-56936827   |               | 0.64395331  | 0.705018592 | -0.061065282 | 7  | 274 |
| chr16:67464389-67465462   | HSD11B2       | 0.173199412 | 0.133564783 | 0.039634629  | 9  | 275 |
| chr1:23945942-23946295    |               | 0.047672015 | 0.087256505 | -0.03958449  | 3  | 276 |
| chr4:190959045-190960011  | RARRES2P4     | 0.386922691 | 0.438802315 | -0.051879624 | 3  | 277 |
| chr16:21294981-21295414   |               | 0.139921906 | 0.240434659 | -0.100512752 | 2  | 278 |
| chr16:85269193-85269464   |               | 0.677643048 | 0.594205065 | 0.083437983  | 1  | 279 |
| chrX:144902966-144903167  |               | 0.345155761 | 0.384583379 | -0.039427618 | 3  | 280 |
| chr4:21950086-21950346    | KCNIP4        | 0.12937284  | 0.204001164 | -0.074628324 | 3  | 281 |
| chr22:48605158-48605507   |               | 0.738394082 | 0.655159009 | 0.083235074  | 3  | 282 |
| chr3:156008992-156009320  |               | 0.536770326 | 0.594634848 | -0.057864521 | 3  | 283 |
| chr19:49559223-49560497   |               | 0.307967155 | 0.353320708 | -0.045353553 | 4  | 284 |
| chrX:31284505-31285019    |               | 0.478002823 | 0.563228841 | -0.085226018 | 4  | 285 |
| chr17:77715571-77716061   |               | 0.264834696 | 0.328276385 | -0.063441689 | 3  | 286 |
| chrX:152912492-152913719  |               | 0.554486869 | 0.605449782 | -0.050962913 | 5  | 287 |
| chr15:20148694-20150115   |               | 0.702455396 | 0.618704525 | 0.083750871  | 3  | 288 |
| chrX:2825439-2825646      |               | 0.744878394 | 0.842696182 | -0.097817788 | 2  | 289 |
| chr20:57414596-57414896   | GNAS          | 0.406402683 | 0.516694468 | -0.110291786 | 2  | 290 |
| chr5:127871959-127872263  | SLC27A6       | 0.806711289 | 0.916096213 | -0.109384924 | 3  | 291 |
| chr13:113540351-113540558 |               | 0.496485109 | 0.576535828 | -0.080050719 | 4  | 292 |
| chr13:53424942-53425995   |               | 0.762207658 | 0.69522472  | 0.066982938  | 5  | 293 |
| chr5:55776605-55777233    |               | 0.040575017 | 0.0792171   | -0.038642083 | 3  | 294 |
| chr10:57388069-57388528   | PCDH15        | 0.33118679  | 0.377625254 | -0.046438464 | 4  | 295 |
| chr19:6822268-6822604     |               | 0.828653316 | 0.935888463 | -0.107235147 | 2  | 296 |
| chr4:185089688-185089989  |               | 0.17788305  | 0.121185629 | 0.056697421  | 3  | 297 |
| chrX:39949373-39949976    |               | 0.515588965 | 0.409894202 | 0.105694763  | 2  | 298 |
| chr1:17287291-17287684    |               | 0.213709516 | 0.252053002 | -0.038343487 | 3  | 299 |
| chrX:3760664-3762210      |               | 0.450414676 | 0.397995845 | 0.052418831  | 2  | 300 |
| chr8:132052204-132054749  | ADCY8         | 0.481743239 | 0.425159239 | 0.056584     | 13 | 301 |
| chr19:4607080-4607350     |               | 0.664322799 | 0.600097212 | 0.064225587  | 4  | 302 |
| chr16:1047495-1048070     |               | 0.527567577 | 0.479700508 | 0.047867069  | 3  | 303 |
| chr18:75611919-75612142   |               | 0.145294544 | 0.078013498 | 0.067281046  | 2  | 304 |
| chr8:131455249-131456285  | ASAP1         | 0.163854556 | 0.201762635 | -0.037908079 | 6  | 305 |
| chr2:219773547-219774103  |               | 0.346754248 | 0.292426694 | 0.054327555  | 5  | 306 |
| chr5:101632050-101632373  | SLCO4C1       | 0.158952302 | 0.109300728 | 0.049651574  | 9  | 307 |
| chrX:36975506-36976349    |               | 0.527266645 | 0.603387952 | -0.076121307 | 4  | 308 |
| chr1:54965024-54965391    |               | 0.314038123 | 0.351845178 | -0.037807055 | 3  | 309 |
| chr22:20790639-20792665   | SCARF2        | 0.195112866 | 0.261607206 | -0.06649434  | 16 | 310 |
| chr17:27949430-27950277   | CORO6         | 0.12820826  | 0.165991813 | -0.037783554 | 3  | 311 |
| chr5:2007316-2007879      |               | 0.620537102 | 0.69338499  | -0.072847888 | 3  | 312 |
| chr9:114937021-114937824  | SUSD1         | 0.146737695 | 0.199229416 | -0.052491721 | 4  | 313 |
| chr10:118927022-118928132 | MIR3663       | 0.7116284   | 0.636355755 | 0.075272645  | 5  | 314 |
| chr3:98376317-98376542    |               | 0.072469006 | 0.110076445 | -0.037607439 | 3  | 315 |
| chr12:103350090-103350422 | ASCL1         | 0.441059442 | 0.370676364 | 0.070383078  | 2  | 316 |
| chr20:34652455-34653500   |               | 0.377248889 | 0.414603303 | -0.037354415 | 4  | 317 |
| chr9:130374109-130374885  | STXBP1        | 0.300879496 | 0.379118857 | -0.078239361 | 2  | 318 |
| chr8:49427075-49427416    |               | 0.052446851 | 0.089608404 | -0.037161553 | 2  | 319 |
| chr7:121943868-121944538  | FEZF1-AS1     | 0.275117708 | 0.330646688 | -0.05552898  | 5  | 320 |
| chr22:50982571-50982994   |               | 0.618115587 | 0.698364619 | -0.080249032 | 2  | 321 |
| chrX:7895078-7895608      | PNPLA4        | 0.405110929 | 0.307046025 | 0.098064904  | 9  | 322 |

|                           |            |             |             |              |    |     |
|---------------------------|------------|-------------|-------------|--------------|----|-----|
| chr10:102778605-102778922 |            | 0.324372011 | 0.361482578 | -0.037110566 | 4  | 323 |
| chr9:29826527-29826736    |            | 0.605175118 | 0.67490027  | -0.069725152 | 2  | 324 |
| chr1:181287301-181287873  |            | 0.282488398 | 0.24546074  | 0.037027658  | 6  | 325 |
| chrX:117629131-117629377  | DOCK11     | 0.620700286 | 0.681412301 | -0.060712015 | 4  | 326 |
| chrX:106959379-106959914  |            | 0.393985086 | 0.445994985 | -0.052009899 | 4  | 327 |
| chrX:103173143-103173967  | TMSB15B    | 0.333691731 | 0.396247878 | -0.062556147 | 3  | 328 |
| chr12:34488611-34489037   |            | 0.484202581 | 0.553548277 | -0.069345696 | 3  | 329 |
| chr9:69065082-69065964    |            | 0.422492824 | 0.476505169 | -0.054012345 | 1  | 330 |
| chr19:35633848-35634629   | FXYP7;LGI4 | 0.269575173 | 0.318742444 | -0.049167271 | 5  | 331 |
| chr19:10627981-10628417   | S1PR5      | 0.061442559 | 0.105423224 | -0.043980665 | 2  | 332 |
| chr3:26665951-26666164    |            | 0.479974518 | 0.535635815 | -0.055661297 | 2  | 333 |
| chr16:633868-634143       |            | 0.732591188 | 0.825746498 | -0.09315531  | 2  | 334 |
| chr7:65878464-65878977    |            | 0.538845262 | 0.467584493 | 0.071260769  | 4  | 335 |
| chr10:37940423-37940674   |            | 0.810937671 | 0.755854748 | 0.055082923  | 3  | 336 |
| chr2:176952696-176953297  |            | 0.706433852 | 0.770575928 | -0.064142076 | 5  | 337 |
| chrX:134655875-134656127  | DDX26B-AS1 | 0.385273532 | 0.424866095 | -0.039592563 | 3  | 338 |
| chr8:81805956-81806327    |            | 0.295116877 | 0.331711191 | -0.036595032 | 4  | 339 |
| chr5:172665307-172666072  |            | 0.189129816 | 0.238817887 | -0.049688071 | 4  | 340 |
| chr8:40755165-40755404    | ZMAT4      | 0.262868886 | 0.214462132 | 0.048406754  | 4  | 341 |
| chr22:17083385-17083628   |            | 0.432843433 | 0.497798066 | -0.064954633 | 3  | 342 |
| chr11:120039602-120040210 |            | 0.289684206 | 0.326164396 | -0.036480189 | 5  | 343 |
| chr8:15094238-15095168    |            | 0.210535904 | 0.247001524 | -0.036465621 | 3  | 344 |
| chr3:40518518-40518848    | ZNF619     | 0.118666293 | 0.186597408 | -0.067931115 | 5  | 345 |
| chrX:67718428-67719071    | YIPF6      | 0.475756747 | 0.527622607 | -0.05186586  | 10 | 346 |
| chr17:38255275-38255896   |            | 0.374701292 | 0.307531126 | 0.067170166  | 4  | 347 |
| chr8:57232371-57232795    |            | 0.656856242 | 0.724444052 | -0.06758781  | 4  | 348 |
| chr16:34407637-34407919   | SLC25A1P4  | 0.609801639 | 0.550155768 | 0.059645871  | 4  | 349 |
| chr4:55094322-55094593    | PDGFRA     | 0.237562454 | 0.276934178 | -0.039371725 | 3  | 350 |
| chr2:210073774-210074294  |            | 0.782276748 | 0.869121629 | -0.08684488  | 2  | 351 |
| chr19:1324970-1325349     |            | 0.138565788 | 0.216467109 | -0.077901321 | 3  | 352 |
| chr21:15052411-15052644   |            | 0.709981317 | 0.632640891 | 0.077340426  | 1  | 353 |
| chrX:132547568-132550284  | GPC4       | 0.389810953 | 0.435323052 | -0.045512098 | 10 | 354 |
| chr8:85096760-85097247    |            | 0.302741871 | 0.338620468 | -0.035878597 | 8  | 355 |
| chr19:22700397-22701261   |            | 0.575605804 | 0.637817127 | -0.062211323 | 3  | 356 |
| chr9:38392510-38393187    | ALDH1B1    | 0.169778694 | 0.110961506 | 0.058817188  | 4  | 357 |
| chr14:65438413-65439363   | RAB15      | 0.182944472 | 0.21873376  | -0.035789287 | 8  | 358 |
| chr10:711897-712395       |            | 0.486728054 | 0.547172551 | -0.060444497 | 6  | 359 |
| chr12:48577362-48578574   | C12orf68   | 0.517246969 | 0.478163231 | 0.039083738  | 6  | 360 |
| chrX:125714891-125715321  |            | 0.673654236 | 0.630647215 | 0.043007022  | 2  | 361 |
| chr5:43000344-43000791    |            | 0.714763345 | 0.799220772 | -0.084457428 | 4  | 362 |
| chrX:105855029-105855297  | CXorf57    | 0.452462945 | 0.504623383 | -0.052160438 | 8  | 363 |
| chr12:121022420-121022704 |            | 0.14246925  | 0.196084156 | -0.053614906 | 3  | 364 |
| chr2:80529678-80530846    |            | 0.285017868 | 0.201576286 | 0.083441582  | 5  | 365 |
| chr17:29814615-29815662   |            | 0.15430298  | 0.189820941 | -0.035517961 | 2  | 366 |
| chr19:54040813-54041857   |            | 0.461173608 | 0.508548916 | -0.047375307 | 9  | 367 |
| chr17:39705046-39705332   |            | 0.249393659 | 0.284840956 | -0.035447297 | 4  | 368 |
| chr17:42015844-42016069   |            | 0.657316074 | 0.59906907  | 0.058247005  | 2  | 369 |
| chr17:40558006-40558274   |            | 0.593341311 | 0.628731749 | -0.035390438 | 3  | 370 |
| chr10:3598476-3598930     |            | 0.582598139 | 0.656113742 | -0.073515604 | 2  | 371 |
| chr2:155554006-155556069  | KCNJ3      | 0.406160576 | 0.369613115 | 0.036547461  | 12 | 372 |
| chr3:172167527-172167866  | GHSR       | 0.690271563 | 0.761933475 | -0.071661912 | 4  | 373 |
| chr17:9018997-9019207     |            | 0.096333001 | 0.13154026  | -0.035207259 | 3  | 374 |
| chr9:95896008-95897016    | NINJ1      | 0.290154205 | 0.25424707  | 0.035907134  | 5  | 375 |
| chr2:112895793-112897841  | FBLN7      | 0.331309617 | 0.411409525 | -0.080099908 | 4  | 376 |
| chr7:62809610-62809812    |            | 0.721648188 | 0.645275145 | 0.076373043  | 1  | 377 |
| chr7:157937615-157937841  |            | 0.462883861 | 0.517959937 | -0.055076076 | 1  | 378 |
| chr2:24300061-24300294    |            | 0.150433382 | 0.102888795 | 0.047544587  | 3  | 379 |
| chr12:102036254-102036461 |            | 0.570340607 | 0.638957471 | -0.068616864 | 3  | 380 |
| chr9:127240132-127240456  |            | 0.333754982 | 0.375833615 | -0.042078634 | 2  | 381 |
| chr8:117950473-117950717  | AARD       | 0.373144361 | 0.483931839 | -0.110787477 | 2  | 382 |
| chr17:19483306-19483687   |            | 0.852472102 | 0.764787702 | 0.087684399  | 4  | 383 |
| chr10:42971196-42971834   | LINC00839  | 0.38587795  | 0.350922052 | 0.034955898  | 4  | 384 |
| chr11:68451360-68452846   | GAL        | 0.790290924 | 0.699856839 | 0.090434085  | 10 | 385 |
| chr16:28303974-28304770   | SBK1       | 0.159541958 | 0.194461327 | -0.034919369 | 3  | 386 |
| chr1:149514272-149514592  | RNVU1-19   | 0.288461704 | 0.253546444 | 0.03491526   | 2  | 387 |

|                           |                 |             |             |              |    |     |
|---------------------------|-----------------|-------------|-------------|--------------|----|-----|
| chr3:68980784-68982035    | FAM19A4         | 0.24883274  | 0.283719028 | -0.034886289 | 10 | 388 |
| chr19:54494609-54494816   | CACNG6          | 0.160926778 | 0.195800489 | -0.03487371  | 2  | 389 |
| chr3:11034447-11035384    | SLC6A1          | 0.390848869 | 0.435645186 | -0.044796317 | 6  | 390 |
| chr9:139734846-139735085  |                 | 0.822851427 | 0.737144328 | 0.085707099  | 1  | 391 |
| chr22:18957996-18958721   | DGCR5           | 0.082261777 | 0.11700959  | -0.034747813 | 3  | 392 |
| chrX:82765443-82765776    |                 | 0.712171423 | 0.648077518 | 0.064093905  | 3  | 393 |
| chr20:32307818-32308120   | PXMP4           | 0.393257871 | 0.536231452 | -0.142973581 | 4  | 394 |
| chr14:103557607-103558235 |                 | 0.430755547 | 0.396145234 | 0.034610314  | 4  | 395 |
| chr22:43547320-43548169   | TSPO            | 0.407360363 | 0.463276602 | -0.055916239 | 7  | 396 |
| chr15:23157795-23158624   |                 | 0.506340437 | 0.559787061 | -0.053446624 | 3  | 397 |
| chr12:54412991-54413346   |                 | 0.077073131 | 0.127796318 | -0.050723187 | 3  | 398 |
| chrX:54834762-54835010    |                 | 0.460905366 | 0.495945892 | -0.035040526 | 2  | 399 |
| chr1:236304759-236305025  | GPR137B         | 0.519052019 | 0.464816437 | 0.054235582  | 4  | 400 |
| chr19:52873085-52873572   | ZNF880          | 0.277221626 | 0.185499113 | 0.091722513  | 7  | 401 |
| chr15:69591247-69591754   | PAQR5           | 0.03848336  | 0.072842008 | -0.034358649 | 4  | 402 |
| chr2:74881360-74882019    | SEMA4F          | 0.238276985 | 0.186329486 | 0.051947499  | 4  | 403 |
| chr17:78079569-78079833   |                 | 0.754300478 | 0.682851172 | 0.071449305  | 5  | 404 |
| chrX:136651179-136651656  |                 | 0.38239284  | 0.41662567  | -0.03423283  | 5  | 405 |
| chr3:42922220-42922872    |                 | 0.178393282 | 0.120302738 | 0.058090544  | 4  | 406 |
| chr16:86528272-86529013   |                 | 0.827843713 | 0.751644145 | 0.076199568  | 5  | 407 |
| chr19:58070554-58071273   | ZNF550          | 0.067244261 | 0.104531253 | -0.037286991 | 4  | 408 |
| chr22:26565200-26565986   | SEZ6L           | 0.156399467 | 0.190547763 | -0.034148296 | 2  | 409 |
| chr16:1429051-1430104     |                 | 0.176582471 | 0.219715695 | -0.043133224 | 8  | 410 |
| chr19:58555799-58556614   | LETM1P2         | 0.822288864 | 0.751171136 | 0.071117728  | 4  | 411 |
| chr4:3748225-3748581      |                 | 0.117889363 | 0.179487771 | -0.061598408 | 3  | 412 |
| chr7:27162088-27162426    |                 | 0.797755751 | 0.887339922 | -0.089584171 | 3  | 413 |
| chr12:63025589-63026213   |                 | 0.1137908   | 0.151098129 | -0.037307329 | 5  | 414 |
| chr15:74218697-74220373   | LOXL1;LOXL1-AS1 | 0.30610877  | 0.345950784 | -0.039842014 | 16 | 415 |
| chr22:46545481-46547412   | PPARA           | 0.153117113 | 0.186957705 | -0.033840592 | 4  | 416 |
| chrX:113816090-113816409  |                 | 0.510244634 | 0.46298582  | 0.047258814  | 4  | 417 |
| chr10:134843466-134843776 |                 | 0.837834916 | 0.7597561   | 0.078078816  | 2  | 418 |
| chr5:2180252-2180467      |                 | 0.755815748 | 0.840607406 | -0.084791658 | 2  | 419 |
| chr2:191399090-191399742  | TMEM194B        | 0.192250623 | 0.282623755 | -0.090373132 | 3  | 420 |
| chr19:12163327-12163560   |                 | 0.200602023 | 0.1669401   | 0.033661924  | 1  | 421 |
| chr10:63212496-63213009   | TMEM26          | 0.538151432 | 0.489600415 | 0.048551016  | 3  | 422 |
| chr2:128165849-128166198  |                 | 0.138468539 | 0.189591651 | -0.051123113 | 4  | 423 |
| chr1:33005424-33005739    | ZBTB8A          | 0.086887505 | 0.053330453 | 0.033557053  | 2  | 424 |
| chr17:7893331-7893702     |                 | 0.103081481 | 0.136632113 | -0.033550631 | 4  | 425 |
| chr19:41857248-41857586   | BCKDHA;TMEM91   | 0.093504179 | 0.135497588 | -0.04199341  | 3  | 426 |
| chr11:98891544-98891821   | CNTN5           | 0.157213496 | 0.190706399 | -0.033492903 | 8  | 427 |
| chr7:148787422-148788601  | ZNF786          | 0.095259088 | 0.12868436  | -0.033425272 | 6  | 428 |
| chr18:14178944-14179710   | ANKRD20A5P      | 0.325235239 | 0.358640666 | -0.033405427 | 3  | 429 |
| chrX:118708294-118709240  | UBE2A           | 0.51504432  | 0.569303896 | -0.054259576 | 11 | 430 |
| chr16:55357522-55359040   | IRX6            | 0.138413631 | 0.174831673 | -0.036418042 | 7  | 431 |
| chr20:33865334-33865563   | EDEM2;MMP24-AS1 | 0.08979777  | 0.123164648 | -0.033366879 | 2  | 432 |
| chr19:2428350-2428731     | TIMM13          | 0.697547142 | 0.776276524 | -0.078729382 | 4  | 433 |
| chr3:196755678-196757374  | MFI2            | 0.389403194 | 0.441540528 | -0.052137334 | 6  | 434 |
| chr16:25702956-25704631   | HS3ST4          | 0.364273291 | 0.328755962 | 0.03551733   | 9  | 435 |
| chr10:133449493-133449716 |                 | 0.669627721 | 0.728151256 | -0.058523535 | 4  | 436 |
| chr2:51254523-51255498    |                 | 0.78315637  | 0.863343692 | -0.080187322 | 4  | 437 |
| chr10:130339527-130339777 |                 | 0.6926802   | 0.768367089 | -0.075686889 | 5  | 438 |
| chr1:88928284-88928760    |                 | 0.349833923 | 0.394803562 | -0.044969639 | 4  | 439 |
| chr11:113906921-113907332 |                 | 0.07857456  | 0.11296653  | -0.03439197  | 3  | 440 |
| chr18:77309696-77312226   |                 | 0.72114492  | 0.799212598 | -0.078067678 | 1  | 441 |
| chr3:184243086-184243328  |                 | 0.626773982 | 0.567881441 | 0.05889254   | 3  | 442 |
| chr7:157455790-157456044  |                 | 0.874463948 | 0.792945301 | 0.081518647  | 3  | 443 |
| chr20:690576-691099       |                 | 0.459973653 | 0.512446895 | -0.052473243 | 3  | 444 |
| chr1:10057122-10058108    | RBP7            | 0.5325367   | 0.580391926 | -0.047855227 | 8  | 445 |
| chr2:16689509-16689822    |                 | 0.238360851 | 0.32748139  | -0.089120539 | 2  | 446 |
| chr1:196577709-196578011  | KCNT2           | 0.29846011  | 0.228430504 | 0.070029606  | 3  | 447 |
| chr5:76115511-76116089    |                 | 0.097410383 | 0.130463238 | -0.033052854 | 5  | 448 |
| chr12:48153330-48153551   |                 | 0.136542192 | 0.10351642  | 0.033025772  | 2  | 449 |
| chr5:140736822-140737058  |                 | 0.702399057 | 0.642113458 | 0.060285599  | 3  | 450 |
| chr19:6590341-6591072     |                 | 0.516485415 | 0.598266971 | -0.081781556 | 3  | 451 |
| chr18:6920592-6920874     |                 | 0.844594197 | 0.917801238 | -0.073207041 | 3  | 452 |



|                           |                   |             |             |              |    |     |
|---------------------------|-------------------|-------------|-------------|--------------|----|-----|
| chr2:99552186-99553831    | KIAA1211L         | 0.394722628 | 0.427644168 | -0.03292154  | 11 | 453 |
| chr4:11430236-11431256    | HS3ST1            | 0.321453508 | 0.280230662 | 0.041222846  | 10 | 454 |
| chr9:66343504-66343760    |                   | 0.661741033 | 0.597937399 | 0.063803634  | 1  | 455 |
| chr19:3982825-3983190     | SNORD37           | 0.778733353 | 0.850324465 | -0.071591112 | 4  | 456 |
| chr19:29218002-29218733   |                   | 0.333747764 | 0.376000343 | -0.042252579 | 5  | 457 |
| chr3:158519510-158520329  |                   | 0.182128182 | 0.215574734 | -0.033446552 | 9  | 458 |
| chr17:47979466-47979740   |                   | 0.24853076  | 0.198309502 | 0.050221259  | 3  | 459 |
| chr22:25816913-25817539   |                   | 0.595279874 | 0.659506423 | -0.064226549 | 3  | 460 |
| chr11:132813563-132814395 |                   | 0.282785923 | 0.315385568 | -0.032599645 | 4  | 461 |
| chr4:113626740-113627507  |                   | 0.320370576 | 0.355812546 | -0.03544197  | 4  | 462 |
| chr6:30523287-30523519    | PRR3              | 0.254962342 | 0.217186124 | 0.037776217  | 9  | 463 |
| chr21:38362016-38362868   | HLCS              | 0.296910804 | 0.262008516 | 0.034902288  | 7  | 464 |
| chr22:29866327-29866652   |                   | 0.130229963 | 0.162712274 | -0.032482311 | 2  | 465 |
| chr18:76765748-76766833   |                   | 0.810110306 | 0.844170565 | -0.034060258 | 5  | 466 |
| chr9:131533780-131534695  | ZER1              | 0.053936333 | 0.086390065 | -0.032453732 | 5  | 467 |
| chr11:64409878-64411253   |                   | 0.424493692 | 0.490599692 | -0.066105999 | 3  | 468 |
| chr9:115708029-115708238  |                   | 0.673851354 | 0.595880727 | 0.077970627  | 1  | 469 |
| chr19:1734222-1734627     |                   | 0.866452323 | 0.79731261  | 0.069139713  | 2  | 470 |
| chr1:2876546-2876808      |                   | 0.552836945 | 0.635936099 | -0.083099154 | 2  | 471 |
| chr5:134870741-134872051  | NEUROG1           | 0.367887422 | 0.409530039 | -0.041642617 | 17 | 472 |
| chr9:112542132-112542667  | AKAP2;PALM2-AKAP2 | 0.060752711 | 0.093003519 | -0.032250808 | 1  | 473 |
| chr8:1311388-1311626      |                   | 0.663042516 | 0.731038619 | -0.067996104 | 3  | 474 |
| chr5:2111837-2112484      |                   | 0.758921616 | 0.829930857 | -0.071009241 | 7  | 475 |
| chr12:30948549-30949757   |                   | 0.149414704 | 0.181565586 | -0.032150882 | 10 | 476 |
| chr16:31453944-31454561   | ZNF843            | 0.279924842 | 0.335812316 | -0.055887474 | 3  | 477 |
| chr7:948295-949168        |                   | 0.389289407 | 0.353540693 | 0.035748715  | 2  | 478 |
| chr1:13839506-13840613    | LRRC38            | 0.529282757 | 0.561190358 | -0.031907602 | 7  | 479 |
| chrX:134655103-134655750  | DDX26B-AS1        | 0.158892917 | 0.244385777 | -0.08549286  | 1  | 480 |
| chrX:148586553-148586984  |                   | 0.391809044 | 0.430126168 | -0.038317124 | 8  | 481 |
| chr9:108418404-108418934  |                   | 0.81691469  | 0.739350197 | 0.077564493  | 4  | 482 |
| chr11:59382688-59382929   |                   | 0.071380511 | 0.103141757 | -0.031761247 | 3  | 483 |
| chr16:71264361-71264659   | HYDIN             | 0.065891017 | 0.128125655 | -0.062234639 | 4  | 484 |
| chrX:153094110-153094620  |                   | 0.49608011  | 0.539983208 | -0.043903097 | 3  | 485 |
| chr7:140339998-140341136  |                   | 0.470343871 | 0.502359409 | -0.032015538 | 3  | 486 |
| chr2:158453800-158454111  |                   | 0.487468439 | 0.528826192 | -0.041357753 | 4  | 487 |
| chr16:30905550-30905783   | BCL7C;MIR762      | 0.116507415 | 0.151247979 | -0.034740564 | 3  | 488 |
| chr2:242156852-242157835  |                   | 0.737184099 | 0.666727436 | 0.070456663  | 2  | 489 |
| chrX:63614958-63615423    | MTMR8             | 0.465982893 | 0.503907046 | -0.037924153 | 5  | 490 |
| chr1:39044060-39044561    |                   | 0.180064087 | 0.239891    | -0.059826914 | 5  | 491 |
| chr9:91605765-91606141    | C9orf47;S1PR3     | 0.84724516  | 0.773011003 | 0.074234156  | 2  | 492 |
| chr9:137997371-137997588  |                   | 0.864009622 | 0.786369698 | 0.077639924  | 2  | 493 |
| chr2:74781495-74782685    | LOXL3             | 0.652039929 | 0.570105603 | 0.081934326  | 4  | 494 |
| chrX:133507135-133507666  | PHF6              | 0.382192897 | 0.419579833 | -0.037386937 | 6  | 495 |
| chr16:22959427-22959876   |                   | 0.843348117 | 0.773394815 | 0.069953302  | 5  | 496 |
| chr19:1725416-1726154     |                   | 0.199327628 | 0.230754179 | -0.031426552 | 5  | 497 |
| chr6:62995856-62996228    | KHDRBS2           | 0.320317567 | 0.280999468 | 0.0393181    | 8  | 498 |
| chr9:69147117-69148171    | PGM5P2            | 0.629207718 | 0.672257816 | -0.043050097 | 2  | 499 |
| chr11:71952113-71952528   |                   | 0.800272334 | 0.709738966 | 0.090533369  | 3  | 500 |

**Supplementary Table S10. List of the 500 top-ranked, gene symbol-associated differentially methylated promoters after *TET* triple knockdown.**

| gene_symbol | beta.GFP_siRNA | beta.GFP_scramble | difference   | num.sites | rank |
|-------------|----------------|-------------------|--------------|-----------|------|
| HAS3        | 0.627405663    | 0.380628042       | 0.246777621  | 6         | 1    |
| RARRES2P5   | 0.451430795    | 0.730780484       | -0.279349689 | 2         | 2    |
| P4HA2       | 0.522194038    | 0.326062153       | 0.196131886  | 2         | 3    |
| SMARCD3     | 0.438274867    | 0.273492898       | 0.164781969  | 1         | 4    |
| IRF5        | 0.513060596    | 0.38025509        | 0.132805506  | 11        | 5    |
| WDR59       | 0.490447068    | 0.341102533       | 0.149344534  | 4         | 6    |
| OXCT1       | 0.55939244     | 0.409200929       | 0.150191511  | 11        | 7    |
| RNU6-835P   | 0.670996225    | 0.452934671       | 0.218061554  | 1         | 8    |
| SPANXA1     | 0.575277151    | 0.393644772       | 0.181632379  | 1         | 9    |
| DOK7        | 0.585459882    | 0.448477239       | 0.136982643  | 11        | 10   |
| RARRES2P9   | 0.265107525    | 0.398350781       | -0.133243257 | 2         | 11   |
| CMTM3       | 0.255229166    | 0.137111242       | 0.118117924  | 3         | 12   |
| VCX3B       | 0.491770209    | 0.69717796        | -0.205407751 | 2         | 13   |
| CPT1A       | 0.699526938    | 0.499549048       | 0.19997789   | 3         | 14   |
| SLC25A1P4   | 0.522522481    | 0.659570616       | -0.137048135 | 5         | 15   |
| GXYLT2      | 0.377215558    | 0.261845935       | 0.115369622  | 2         | 16   |
| KIAA1549    | 0.50113987     | 0.386111498       | 0.115028372  | 4         | 17   |
| UBQLN1      | 0.462660017    | 0.293654856       | 0.169005161  | 4         | 18   |
| ACSM1       | 0.522226397    | 0.727018781       | -0.204792384 | 1         | 19   |
| HNRNPDP2    | 0.826573871    | 0.584769795       | 0.241804076  | 1         | 20   |
| WIBG        | 0.818920765    | 0.61517116        | 0.203749605  | 4         | 21   |
| GGCT        | 0.618579549    | 0.451710697       | 0.166868851  | 1         | 22   |
| MIR4435-1HG | 0.244189238    | 0.135228647       | 0.108960591  | 1         | 23   |
| OR2L3       | 0.344214061    | 0.574729546       | -0.230515485 | 1         | 24   |
| TYR         | 0.49269879     | 0.668337144       | -0.175638354 | 1         | 25   |
| CCDC159     | 0.387744276    | 0.495276936       | -0.10753266  | 2         | 26   |
| MRPL36      | 0.208262359    | 0.096767782       | 0.111494578  | 9         | 27   |
| OR4X2       | 0.312089001    | 0.596018714       | -0.283929713 | 1         | 28   |
| DECR1       | 0.828245792    | 0.627839657       | 0.200406135  | 10        | 29   |
| KRTAP5-AS1  | 0.670096951    | 0.516449576       | 0.153647375  | 3         | 30   |
| C15orf62    | 0.556317218    | 0.436813042       | 0.119504175  | 9         | 31   |
| USP4        | 0.485335725    | 0.383528628       | 0.101807097  | 6         | 32   |
| RN7SL444P   | 0.430046993    | 0.263306587       | 0.166740405  | 1         | 33   |
| PLK5        | 0.648136359    | 0.546834481       | 0.101301877  | 6         | 34   |
| TNRC6C-AS1  | 0.415549476    | 0.547538734       | -0.131989257 | 1         | 35   |
| HBE1        | 0.582506524    | 0.764790266       | -0.182283742 | 2         | 36   |
| GP2         | 0.276190957    | 0.502201253       | -0.226010296 | 2         | 37   |
| SERPINE2    | 0.362477049    | 0.23963647        | 0.122840579  | 7         | 38   |
| CMPK2       | 0.555783862    | 0.455510221       | 0.100273641  | 3         | 39   |
| LRAT        | 0.619540329    | 0.49856906        | 0.120971269  | 8         | 40   |
| HIST1H2AD   | 0.49578106     | 0.394785591       | 0.100995469  | 12        | 41   |
| HIST1H3D    | 0.49578106     | 0.394785591       | 0.100995469  | 12        | 42   |
| OR9G1       | 0.210253643    | 0.400065424       | -0.189811782 | 3         | 43   |
| CD274       | 0.477537195    | 0.379600909       | 0.097936286  | 5         | 44   |
| ADAMTSL1    | 0.767833671    | 0.602492428       | 0.165341243  | 2         | 45   |
| SLC2A11     | 0.631453903    | 0.495871          | 0.135582903  | 4         | 46   |

|            |             |             |              |    |    |
|------------|-------------|-------------|--------------|----|----|
| OR2M4      | 0.377800089 | 0.545018802 | -0.167218713 | 2  | 47 |
| SPINK2     | 0.534520264 | 0.428129654 | 0.10639061   | 6  | 48 |
| KCNA4      | 0.540792098 | 0.40787047  | 0.132921629  | 14 | 49 |
| CIRH1A     | 0.654101875 | 0.5129905   | 0.141111375  | 1  | 50 |
| IRF6       | 0.55948142  | 0.410976011 | 0.148505409  | 14 | 51 |
| AACSP1     | 0.858017562 | 0.676037834 | 0.181979728  | 1  | 52 |
| FBXO24     | 0.555998273 | 0.460059451 | 0.095938822  | 3  | 53 |
| HIST1H2BF  | 0.482940758 | 0.383552185 | 0.099388573  | 11 | 54 |
| CLCF1      | 0.568530164 | 0.476549692 | 0.091980471  | 13 | 55 |
| ZFAND2A    | 0.187060629 | 0.090665342 | 0.096395287  | 7  | 56 |
| CLIC3      | 0.535314804 | 0.443565043 | 0.091749761  | 4  | 57 |
| COX20P2    | 0.253266074 | 0.149507768 | 0.103758306  | 2  | 58 |
| HSPB8      | 0.670403414 | 0.578887264 | 0.09151615   | 10 | 59 |
| OR2I1P     | 0.624654396 | 0.507861937 | 0.116792459  | 21 | 60 |
| SSBP4      | 0.739263057 | 0.601950141 | 0.137312916  | 3  | 61 |
| TRIM48     | 0.667996041 | 0.834000183 | -0.166004142 | 2  | 62 |
| SULT1C4    | 0.785331933 | 0.654312667 | 0.131019266  | 9  | 63 |
| HIST1H1PS1 | 0.87834412  | 0.721146084 | 0.157198036  | 5  | 64 |
| TRAV8-5    | 0.296269163 | 0.445392079 | -0.149122916 | 2  | 65 |
| SOX30      | 0.475740685 | 0.359511346 | 0.116229339  | 10 | 66 |
| CDH8       | 0.194005718 | 0.357636381 | -0.163630664 | 1  | 67 |
| BRWD1-IT2  | 0.794562136 | 0.635134861 | 0.159427275  | 1  | 68 |
| ITGB5-AS1  | 0.847591346 | 0.678011867 | 0.169579479  | 1  | 69 |
| C1QTNF4    | 0.746164884 | 0.657096254 | 0.08906863   | 5  | 70 |
| RBP7       | 0.678872194 | 0.553371812 | 0.125500382  | 11 | 71 |
| RIPPLY2    | 0.467526817 | 0.36905679  | 0.098470027  | 12 | 72 |
| MEOX2      | 0.655179402 | 0.448053774 | 0.207125628  | 13 | 73 |
| GBP4       | 0.561335539 | 0.423300005 | 0.138035534  | 7  | 74 |
| UBE2C      | 0.565287326 | 0.464654285 | 0.100633041  | 18 | 75 |
| ANO1       | 0.491597839 | 0.387855037 | 0.103742801  | 11 | 76 |
| PDE1B      | 0.601551733 | 0.513676434 | 0.087875299  | 7  | 77 |
| ATP2C2     | 0.629911206 | 0.532787202 | 0.097124004  | 7  | 78 |
| ROBO1      | 0.477161117 | 0.376733417 | 0.1004277    | 7  | 79 |
| WDR86      | 0.481977442 | 0.39214589  | 0.089831553  | 5  | 80 |
| USB1       | 0.827080679 | 0.682414038 | 0.144666641  | 4  | 81 |
| MYCT1      | 0.80726857  | 0.652502804 | 0.154765766  | 1  | 82 |
| FEZF1-AS1  | 0.734542581 | 0.622731313 | 0.111811268  | 5  | 83 |
| PABPC4L    | 0.486533711 | 0.384221196 | 0.102312515  | 5  | 84 |
| ATP6V0CP3  | 0.63368396  | 0.547014812 | 0.086669148  | 4  | 85 |
| NAGK       | 0.88969995  | 0.723263378 | 0.166436572  | 1  | 86 |
| MTATP8P2   | 0.408429503 | 0.322680122 | 0.085749381  | 1  | 87 |
| EEF1A1P25  | 0.495042489 | 0.609339608 | -0.114297119 | 1  | 88 |
| MIR5684    | 0.831038862 | 0.67625437  | 0.154784493  | 1  | 89 |
| ZNF597     | 0.626807016 | 0.515406588 | 0.111400428  | 12 | 90 |
| CPAMD8     | 0.648133945 | 0.547478028 | 0.100655917  | 9  | 91 |
| CPQ        | 0.413416776 | 0.291645524 | 0.121771252  | 14 | 92 |
| MIR4801    | 0.24655939  | 0.415511659 | -0.168952269 | 3  | 93 |
| SPANXN5    | 0.674702873 | 0.783832274 | -0.109129401 | 3  | 94 |
| C5orf52    | 0.385648699 | 0.273316279 | 0.11233242   | 10 | 95 |
| TTC39B     | 0.545483773 | 0.453634655 | 0.091849118  | 2  | 96 |

|              |             |             |              |    |     |
|--------------|-------------|-------------|--------------|----|-----|
| C1QTNF2      | 0.656241271 | 0.571788004 | 0.084453267  | 12 | 97  |
| LINC00966    | 0.620160283 | 0.4903983   | 0.129761982  | 10 | 98  |
| FBXO6        | 0.617484229 | 0.520164505 | 0.097319724  | 8  | 99  |
| HNRNPH1      | 0.823957091 | 0.674670835 | 0.149286256  | 1  | 100 |
| SLC37A3      | 0.692199045 | 0.565785794 | 0.126413251  | 5  | 101 |
| SEMA4C       | 0.369894224 | 0.281387118 | 0.088507106  | 3  | 102 |
| B4GALT6      | 0.451188089 | 0.343388048 | 0.107800041  | 3  | 103 |
| CAPN1        | 0.770527591 | 0.631948906 | 0.138578685  | 1  | 104 |
| CYP4F22      | 0.61692204  | 0.533794616 | 0.083127424  | 7  | 105 |
| MUM1L1       | 0.218658938 | 0.314122614 | -0.095463676 | 1  | 106 |
| ZNF253       | 0.361553892 | 0.263629087 | 0.097924804  | 9  | 107 |
| RNA5SP127    | 0.790324159 | 0.649536029 | 0.14078813   | 1  | 108 |
| GPSM1        | 0.514221829 | 0.431462949 | 0.08275888   | 4  | 109 |
| DPY19L2P2    | 0.583976333 | 0.48287203  | 0.101104303  | 13 | 110 |
| C9orf66      | 0.751552611 | 0.618233782 | 0.133318828  | 1  | 111 |
| FBLIM1       | 0.840783074 | 0.692675364 | 0.14810771   | 1  | 112 |
| CYP4A22      | 0.48491709  | 0.576056714 | -0.091139624 | 2  | 113 |
| TSPAN18      | 0.562819949 | 0.461320167 | 0.101499782  | 2  | 114 |
| ZSCAN1       | 0.81743212  | 0.696260055 | 0.121172065  | 11 | 115 |
| ICA1         | 0.694179343 | 0.59908066  | 0.095098683  | 11 | 116 |
| LINC00574    | 0.484665888 | 0.400651143 | 0.084014745  | 12 | 117 |
| SP9          | 0.693262372 | 0.566333935 | 0.126928437  | 16 | 118 |
| TGFBR3L      | 0.526641361 | 0.428056909 | 0.098584452  | 4  | 119 |
| SERPINB4     | 0.364229852 | 0.445864279 | -0.081634426 | 2  | 120 |
| RNVU1-20     | 0.294279084 | 0.21268307  | 0.081596014  | 2  | 121 |
| PPP1R26      | 0.710964459 | 0.627063367 | 0.083901093  | 3  | 122 |
| PSMB10       | 0.564527445 | 0.454788062 | 0.109739383  | 5  | 123 |
| ARHGAP31-AS1 | 0.397865917 | 0.315253573 | 0.082612343  | 6  | 124 |
| TINCR        | 0.524257329 | 0.440908699 | 0.08334863   | 7  | 125 |
| DUSP26       | 0.590337147 | 0.500434818 | 0.089902329  | 9  | 126 |
| TIGD7        | 0.71144019  | 0.588832172 | 0.122608018  | 7  | 127 |
| OR6Q1        | 0.102419209 | 0.212024585 | -0.109605376 | 1  | 128 |
| NAA60        | 0.645648898 | 0.545434584 | 0.100214314  | 12 | 129 |
| CUL1         | 0.650269832 | 0.558397975 | 0.091871857  | 6  | 130 |
| TNFRSF11A    | 0.410409026 | 0.312986882 | 0.097422144  | 8  | 131 |
| RGS21        | 0.385533301 | 0.487657515 | -0.102124214 | 1  | 132 |
| LINC00152    | 0.230185838 | 0.091484864 | 0.138700974  | 1  | 133 |
| MIR4277      | 0.728100758 | 0.614101739 | 0.113999019  | 2  | 134 |
| BEAN1        | 0.394491538 | 0.305647477 | 0.08884406   | 5  | 135 |
| MIR4740      | 0.839906888 | 0.720471437 | 0.119435452  | 7  | 136 |
| SUMO2P6      | 0.755019311 | 0.627628364 | 0.127390947  | 1  | 137 |
| ZNF385D      | 0.579357984 | 0.498551479 | 0.080806505  | 4  | 138 |
| TCN2         | 0.667164665 | 0.555592345 | 0.11157232   | 9  | 139 |
| DPPA4        | 0.769710385 | 0.650663815 | 0.11904657   | 6  | 140 |
| OR13D1       | 0.251024733 | 0.469486786 | -0.218462053 | 1  | 141 |
| ZNF846       | 0.80330772  | 0.684301902 | 0.119005818  | 4  | 142 |
| TRBV6-1      | 0.648395316 | 0.536044009 | 0.112351307  | 3  | 143 |
| CREBZF       | 0.758418746 | 0.631887695 | 0.126531051  | 3  | 144 |
| OR5H14       | 0.309457644 | 0.431463715 | -0.12200607  | 2  | 145 |
| RHOT1P3      | 0.364821158 | 0.488487313 | -0.123666155 | 2  | 146 |

|            |             |             |              |    |     |
|------------|-------------|-------------|--------------|----|-----|
| FHAD1      | 0.592971288 | 0.512549938 | 0.08042135   | 10 | 147 |
| TJP1       | 0.750386834 | 0.652746057 | 0.097640778  | 4  | 148 |
| PTGER2     | 0.475589468 | 0.396739382 | 0.078850086  | 8  | 149 |
| B3GNT9     | 0.827141451 | 0.688347305 | 0.138794145  | 7  | 150 |
| ATP2B2     | 0.549705165 | 0.458421746 | 0.09128342   | 3  | 151 |
| LY6G6E     | 0.377400104 | 0.465441347 | -0.088041242 | 8  | 152 |
| ZNF619     | 0.430482083 | 0.322281102 | 0.108200981  | 8  | 153 |
| MYH11      | 0.644309746 | 0.52753219  | 0.116777556  | 7  | 154 |
| SLC19A3    | 0.69150497  | 0.587995282 | 0.103509688  | 9  | 155 |
| RN7SKP190  | 0.859393837 | 0.718492561 | 0.140901276  | 1  | 156 |
| PHLDB3     | 0.578543602 | 0.501345342 | 0.077198261  | 10 | 157 |
| OR5AP2     | 0.49495496  | 0.628155823 | -0.133200863 | 3  | 158 |
| ZFP42      | 0.822915387 | 0.703350475 | 0.119564912  | 13 | 159 |
| ZNF491     | 0.563242467 | 0.472925194 | 0.090317273  | 2  | 160 |
| ATL3       | 0.803773081 | 0.681183825 | 0.122589257  | 11 | 161 |
| TAS2R39    | 0.392656379 | 0.511757434 | -0.119101055 | 3  | 162 |
| RNU1-1     | 0.502400567 | 0.419996393 | 0.082404174  | 1  | 163 |
| RN7SL805P  | 0.511092418 | 0.393292289 | 0.117800129  | 1  | 164 |
| CTNNA1     | 0.730714854 | 0.612269784 | 0.118445071  | 1  | 165 |
| EVA1C      | 0.313103366 | 0.236787936 | 0.07631543   | 6  | 166 |
| PDE7A      | 0.246596737 | 0.16594437  | 0.080652367  | 4  | 167 |
| OR51B2     | 0.358724574 | 0.499582715 | -0.140858141 | 4  | 168 |
| C9orf50    | 0.705054506 | 0.618075806 | 0.0869787    | 5  | 169 |
| TUBBP5     | 0.570007868 | 0.483770586 | 0.086237282  | 2  | 170 |
| COL15A1    | 0.663011668 | 0.565392414 | 0.097619255  | 3  | 171 |
| LRRTM3     | 0.336622666 | 0.261024055 | 0.075598611  | 6  | 172 |
| DENND2A    | 0.679828043 | 0.580334152 | 0.099493891  | 2  | 173 |
| MYD88      | 0.42813918  | 0.340470394 | 0.087668786  | 14 | 174 |
| PTPN5      | 0.677148534 | 0.587360152 | 0.089788383  | 3  | 175 |
| ANKDD1B    | 0.741809404 | 0.625120547 | 0.116688857  | 5  | 176 |
| SNTG1      | 0.747676465 | 0.627175876 | 0.120500589  | 6  | 177 |
| ZNF784     | 0.217943996 | 0.14297058  | 0.074973416  | 9  | 178 |
| MNDA       | 0.12210603  | 0.261374526 | -0.139268496 | 2  | 179 |
| TRMT1      | 0.244822944 | 0.158703658 | 0.086119287  | 5  | 180 |
| FBXL15     | 0.826333787 | 0.70384321  | 0.122490577  | 9  | 181 |
| PAH        | 0.677114043 | 0.580613605 | 0.096500437  | 12 | 182 |
| NFAT5      | 0.410720624 | 0.301395554 | 0.10932507   | 5  | 183 |
| ROM1       | 0.58196778  | 0.504125846 | 0.077841934  | 2  | 184 |
| STMN1P1    | 0.084577645 | 0.215780999 | -0.131203354 | 1  | 185 |
| TMEM161BP1 | 0.203404285 | 0.129126154 | 0.074278131  | 1  | 186 |
| ITGAX      | 0.485701264 | 0.398883653 | 0.086817611  | 5  | 187 |
| ESRRG      | 0.712165809 | 0.611109451 | 0.101056358  | 14 | 188 |
| SUZ12      | 0.269812557 | 0.184574525 | 0.085238032  | 7  | 189 |
| BIN2P1     | 0.877045425 | 0.740057479 | 0.136987945  | 1  | 190 |
| RIT1       | 0.316029316 | 0.242153975 | 0.073875341  | 7  | 191 |
| ITGB2      | 0.687054309 | 0.583286008 | 0.1037683    | 5  | 192 |
| NBL1       | 0.614656299 | 0.51846753  | 0.096188769  | 1  | 193 |
| DSCAM      | 0.662124053 | 0.576795187 | 0.085328866  | 10 | 194 |
| KCNJ12     | 0.730580377 | 0.629427375 | 0.101153001  | 8  | 195 |
| RPP25      | 0.730002383 | 0.64117055  | 0.088831833  | 11 | 196 |

|           |             |             |              |    |     |
|-----------|-------------|-------------|--------------|----|-----|
| AS3MT     | 0.559637999 | 0.444059838 | 0.115578161  | 11 | 197 |
| LINC00693 | 0.43981696  | 0.337047269 | 0.10276969   | 2  | 198 |
| ZFP2      | 0.74422091  | 0.629997336 | 0.114223574  | 5  | 199 |
| RN7SL718P | 0.705530994 | 0.596119556 | 0.109411438  | 1  | 200 |
| OR13F1    | 0.34882378  | 0.595845443 | -0.247021663 | 1  | 201 |
| CRK       | 0.602656511 | 0.675773953 | -0.073117443 | 4  | 202 |
| ZIC1      | 0.790760733 | 0.672525558 | 0.118235175  | 14 | 203 |
| KCNN2     | 0.614696236 | 0.467168301 | 0.147527935  | 3  | 204 |
| RAB19     | 0.752022673 | 0.640436874 | 0.111585798  | 9  | 205 |
| SOWAHB    | 0.409968069 | 0.337064497 | 0.072903572  | 8  | 206 |
| SDCBPP2   | 0.570522123 | 0.437003679 | 0.133518444  | 3  | 207 |
| PES1      | 0.697084173 | 0.596074218 | 0.101009955  | 10 | 208 |
| KCTD13    | 0.606163243 | 0.533397556 | 0.072765687  | 2  | 209 |
| LRRFIP1P1 | 0.606043449 | 0.517194771 | 0.088848678  | 6  | 210 |
| MIR383    | 0.436837762 | 0.546469589 | -0.109631827 | 2  | 211 |
| FAIM3     | 0.80515206  | 0.694104282 | 0.111047778  | 3  | 212 |
| AWAT1     | 0.245195203 | 0.381472375 | -0.136277172 | 1  | 213 |
| MOB3C     | 0.660457014 | 0.565470322 | 0.094986692  | 8  | 214 |
| RAB15     | 0.41378104  | 0.341593854 | 0.072187186  | 5  | 215 |
| C19orf59  | 0.810896382 | 0.698231153 | 0.112665229  | 6  | 216 |
| STX8      | 0.445586743 | 0.373466555 | 0.072120188  | 9  | 217 |
| ELN       | 0.770119664 | 0.664385552 | 0.105734112  | 8  | 218 |
| KIRREL3   | 0.452564718 | 0.381119629 | 0.071445089  | 8  | 219 |
| COX6B2    | 0.462568207 | 0.377686146 | 0.084882061  | 13 | 220 |
| LINC00665 | 0.402344161 | 0.330951752 | 0.071392409  | 6  | 221 |
| VAV3      | 0.395960616 | 0.322278078 | 0.073682537  | 8  | 222 |
| DARS      | 0.304477124 | 0.233106821 | 0.071370304  | 5  | 223 |
| STXBP6    | 0.558074233 | 0.486705003 | 0.071369231  | 4  | 224 |
| HEPH      | 0.171188065 | 0.286027581 | -0.114839516 | 3  | 225 |
| BCR       | 0.66325217  | 0.568028542 | 0.095223628  | 4  | 226 |
| ASIC5     | 0.667383714 | 0.546131314 | 0.1212524    | 3  | 227 |
| GOS2      | 0.554268103 | 0.462037791 | 0.092230312  | 12 | 228 |
| BRWD1-AS1 | 0.435211757 | 0.350798188 | 0.084413569  | 2  | 229 |
| SMKR1     | 0.3966098   | 0.318228246 | 0.078381554  | 3  | 230 |
| TRABD2A   | 0.617582934 | 0.499018869 | 0.118564065  | 4  | 231 |
| MKNK1     | 0.704038686 | 0.604552955 | 0.099485731  | 10 | 232 |
| FOXN2     | 0.474699213 | 0.404034506 | 0.070664706  | 4  | 233 |
| ISM2      | 0.544820698 | 0.474368785 | 0.070451913  | 9  | 234 |
| LINC00682 | 0.563010092 | 0.445423551 | 0.117586541  | 5  | 235 |
| IFIT3     | 0.549859902 | 0.453907664 | 0.095952239  | 3  | 236 |
| VSTM4     | 0.435431304 | 0.36506841  | 0.070362894  | 8  | 237 |
| TSPY26P   | 0.757697621 | 0.646978022 | 0.110719599  | 6  | 238 |
| GPR62     | 0.824791469 | 0.706994498 | 0.117796971  | 4  | 239 |
| BEND4     | 0.845211735 | 0.726569496 | 0.118642239  | 10 | 240 |
| NHLRC4    | 0.798147705 | 0.704065353 | 0.094082352  | 9  | 241 |
| PIGQ      | 0.798147705 | 0.704065353 | 0.094082352  | 9  | 242 |
| ADCY1     | 0.661388229 | 0.559384796 | 0.102003433  | 6  | 243 |
| DAOA      | 0.235893106 | 0.377464012 | -0.141570906 | 3  | 244 |
| NTSR1     | 0.573806207 | 0.493982435 | 0.079823773  | 8  | 245 |
| UGT2B10   | 0.262270701 | 0.489231258 | -0.226960557 | 1  | 246 |

|            |             |             |              |    |     |
|------------|-------------|-------------|--------------|----|-----|
| LINC00544  | 0.787196681 | 0.672042197 | 0.115154484  | 1  | 247 |
| C14orf39   | 0.824879479 | 0.69874806  | 0.126131419  | 6  | 248 |
| TG         | 0.72884745  | 0.808094335 | -0.079246885 | 5  | 249 |
| SCAMP5     | 0.690253938 | 0.61140828  | 0.078845658  | 12 | 250 |
| SEMA4G     | 0.268808553 | 0.19953787  | 0.069270682  | 6  | 251 |
| MIR4783    | 0.575003355 | 0.495885758 | 0.079117597  | 4  | 252 |
| MIR5193    | 0.866245672 | 0.740076421 | 0.126169251  | 1  | 253 |
| APLNR      | 0.736947836 | 0.659936148 | 0.077011688  | 5  | 254 |
| CASD1      | 0.568540587 | 0.47096995  | 0.097570637  | 4  | 255 |
| ABCF1      | 0.243619881 | 0.17456394  | 0.069055941  | 31 | 256 |
| HIST1H2AE  | 0.780889133 | 0.673734819 | 0.107154314  | 11 | 257 |
| REEP1      | 0.559771169 | 0.486611027 | 0.073160142  | 12 | 258 |
| ACAA1      | 0.380117371 | 0.31063283  | 0.069484541  | 13 | 259 |
| FZD10-AS1  | 0.660758159 | 0.564640138 | 0.096118021  | 9  | 260 |
| SH2D2A     | 0.49369166  | 0.409404685 | 0.084286975  | 3  | 261 |
| ARL17B     | 0.38265798  | 0.31386518  | 0.0687928    | 1  | 262 |
| PABPC1P1   | 0.675503276 | 0.577558812 | 0.097944464  | 1  | 263 |
| ARMCX6     | 0.243886855 | 0.312651082 | -0.068764228 | 8  | 264 |
| AGPAT2     | 0.664437539 | 0.591623489 | 0.072814049  | 4  | 265 |
| RGS20      | 0.403362682 | 0.489084344 | -0.085721661 | 2  | 266 |
| SLC2A3     | 0.672101794 | 0.576715748 | 0.095386046  | 7  | 267 |
| GAD2       | 0.590262485 | 0.50613491  | 0.084127575  | 13 | 268 |
| NCKAP5     | 0.613226169 | 0.542312737 | 0.070913432  | 8  | 269 |
| STAB2      | 0.729741642 | 0.830940436 | -0.101198795 | 6  | 270 |
| SH3BP1     | 0.851293691 | 0.729049308 | 0.122244383  | 1  | 271 |
| RHOA       | 0.290448244 | 0.222135602 | 0.068312642  | 2  | 272 |
| SLC4A11    | 0.649739466 | 0.560624839 | 0.089114628  | 7  | 273 |
| SPATA12    | 0.863053737 | 0.743584847 | 0.11946889   | 3  | 274 |
| FUOM       | 0.707590778 | 0.634502828 | 0.07308795   | 12 | 275 |
| KCNS3      | 0.760605843 | 0.631392762 | 0.12921308   | 9  | 276 |
| PTPRN      | 0.732883738 | 0.640449712 | 0.092434026  | 7  | 277 |
| SCNM1      | 0.67362423  | 0.59779299  | 0.07583124   | 6  | 278 |
| TNFAIP8L2  | 0.67362423  | 0.59779299  | 0.07583124   | 6  | 279 |
| FHDC1      | 0.640850951 | 0.547783178 | 0.093067773  | 5  | 280 |
| SGIP1      | 0.823300341 | 0.706495554 | 0.116804788  | 7  | 281 |
| HOXA7      | 0.864427146 | 0.746931751 | 0.117495395  | 12 | 282 |
| GPR19      | 0.578890923 | 0.500525995 | 0.078364928  | 12 | 283 |
| EBNA1BP2   | 0.796505166 | 0.669322625 | 0.127182541  | 3  | 284 |
| SLC5A5     | 0.487536056 | 0.420144256 | 0.067391801  | 12 | 285 |
| KLHL1      | 0.661622568 | 0.565022879 | 0.096599689  | 10 | 286 |
| BOK-AS1    | 0.747303206 | 0.668859082 | 0.078444124  | 11 | 287 |
| MEIS3      | 0.623674562 | 0.55240642  | 0.071268141  | 6  | 288 |
| TAC1       | 0.751989538 | 0.606588251 | 0.145401287  | 10 | 289 |
| ACOT11     | 0.179427136 | 0.112286456 | 0.06714068   | 9  | 290 |
| ACOT12     | 0.835894941 | 0.71585213  | 0.120042811  | 5  | 291 |
| HIST2H3DP1 | 0.593301653 | 0.509303427 | 0.083998226  | 1  | 292 |
| DBX1       | 0.829175975 | 0.716952312 | 0.112223663  | 15 | 293 |
| CYP11B1    | 0.516954597 | 0.583917842 | -0.066963245 | 6  | 294 |
| FAM150B    | 0.921030362 | 0.79424609  | 0.126784272  | 8  | 295 |
| LINC00426  | 0.820586356 | 0.705268467 | 0.115317889  | 1  | 296 |

|           |             |             |              |    |     |
|-----------|-------------|-------------|--------------|----|-----|
| VAV3-AS1  | 0.585968054 | 0.50551712  | 0.080450934  | 5  | 297 |
| MKLN1     | 0.37600072  | 0.309140259 | 0.066860461  | 11 | 298 |
| OR51A2    | 0.30591452  | 0.481496131 | -0.175581612 | 4  | 299 |
| PCDHGA12  | 0.866696772 | 0.78162498  | 0.085071792  | 10 | 300 |
| SPARC     | 0.797074967 | 0.695304447 | 0.101770519  | 9  | 301 |
| CD72      | 0.21281394  | 0.146092428 | 0.066721512  | 4  | 302 |
| ATP2C1    | 0.844065167 | 0.725919348 | 0.118145819  | 1  | 303 |
| TENC1     | 0.466712937 | 0.400008477 | 0.06670446   | 4  | 304 |
| WDR86-AS1 | 0.877723959 | 0.757634212 | 0.120089747  | 3  | 305 |
| FAM184B   | 0.68829443  | 0.576842181 | 0.111452249  | 13 | 306 |
| PRTFDC1   | 0.553929846 | 0.468700096 | 0.08522975   | 6  | 307 |
| TNFRSF9   | 0.77499681  | 0.701372937 | 0.073623874  | 6  | 308 |
| VWC2      | 0.791102615 | 0.642719122 | 0.148383492  | 9  | 309 |
| C2orf70   | 0.809154881 | 0.699499893 | 0.109654988  | 14 | 310 |
| MIR1273F  | 0.528023434 | 0.451673482 | 0.076349952  | 8  | 311 |
| ECHDC3    | 0.827589522 | 0.722649721 | 0.1049398    | 10 | 312 |
| TRAF1     | 0.722624749 | 0.653571561 | 0.069053188  | 4  | 313 |
| ACSL6     | 0.484285908 | 0.412301578 | 0.07198433   | 8  | 314 |
| PAPOLA    | 0.510477875 | 0.433942867 | 0.076535008  | 4  | 315 |
| HLF       | 0.455954203 | 0.348352155 | 0.107602049  | 10 | 316 |
| HIST1H2BG | 0.791918998 | 0.688562291 | 0.103356707  | 12 | 317 |
| HSD17B14  | 0.65528638  | 0.565398123 | 0.089888257  | 6  | 318 |
| SLC9A3P3  | 0.697614121 | 0.810376597 | -0.112762476 | 1  | 319 |
| GPR114    | 0.859534755 | 0.740370151 | 0.119164604  | 3  | 320 |
| LINC00276 | 0.362447607 | 0.470796469 | -0.108348862 | 2  | 321 |
| MIRLET7A2 | 0.340589569 | 0.475375576 | -0.134786007 | 3  | 322 |
| EEF1G     | 0.550547373 | 0.450469717 | 0.100077656  | 5  | 323 |
| HMGB3P1   | 0.496773857 | 0.41051085  | 0.086263008  | 2  | 324 |
| RORA      | 0.393440375 | 0.319684236 | 0.073756139  | 9  | 325 |
| CITED4    | 0.684845832 | 0.590759156 | 0.094086676  | 11 | 326 |
| DSCAML1   | 0.700520113 | 0.604238142 | 0.096281971  | 4  | 327 |
| FAM19A1   | 0.337819775 | 0.53697208  | -0.199152305 | 3  | 328 |
| KIAA1161  | 0.391556577 | 0.32586042  | 0.065696157  | 5  | 329 |
| SLC16A11  | 0.593937036 | 0.511532228 | 0.082404808  | 10 | 330 |
| THBD      | 0.444307777 | 0.378614302 | 0.065693475  | 10 | 331 |
| OR13C8    | 0.34724931  | 0.476119298 | -0.128869988 | 1  | 332 |
| SLFN12    | 0.696884062 | 0.599985653 | 0.096898409  | 9  | 333 |
| YBX2      | 0.804319646 | 0.715249324 | 0.089070322  | 16 | 334 |
| SLC38A7   | 0.620223344 | 0.551035669 | 0.069187674  | 5  | 335 |
| MTFR1L    | 0.905941165 | 0.79043577  | 0.115505395  | 3  | 336 |
| FAM122A   | 0.298608774 | 0.225558804 | 0.073049971  | 5  | 337 |
| AK3       | 0.854949474 | 0.737468485 | 0.117480989  | 1  | 338 |
| VN1R64P   | 0.410838689 | 0.535144462 | -0.124305773 | 1  | 339 |
| BACL2     | 0.633728692 | 0.550383894 | 0.083344798  | 10 | 340 |
| VSNL1     | 0.513479141 | 0.400904622 | 0.112574519  | 3  | 341 |
| RIOK3     | 0.446689741 | 0.38170748  | 0.064982261  | 7  | 342 |
| UBN1      | 0.408232823 | 0.319907479 | 0.088325344  | 4  | 343 |
| RCOR3     | 0.303963742 | 0.23903171  | 0.064932032  | 6  | 344 |
| BSG       | 0.687604275 | 0.599849339 | 0.087754936  | 7  | 345 |
| OR11H6    | 0.33496463  | 0.460399783 | -0.125435153 | 1  | 346 |



|             |             |             |              |    |     |
|-------------|-------------|-------------|--------------|----|-----|
| RN7SL136P   | 0.449676355 | 0.323323002 | 0.126353353  | 1  | 347 |
| IL1R1       | 0.849214558 | 0.733132023 | 0.116082536  | 1  | 348 |
| PIK3CD      | 0.659489333 | 0.572357303 | 0.087132029  | 9  | 349 |
| LRFN3       | 0.539087613 | 0.652606427 | -0.113518814 | 1  | 350 |
| C4orf50     | 0.719515635 | 0.833124271 | -0.113608635 | 1  | 351 |
| SP5         | 0.390084452 | 0.297887683 | 0.092196768  | 16 | 352 |
| PLCB2       | 0.798628747 | 0.69781006  | 0.100818687  | 9  | 353 |
| SOGA2P1     | 0.522453769 | 0.411737125 | 0.110716644  | 1  | 354 |
| P2RX7       | 0.722695858 | 0.631884247 | 0.09081161   | 9  | 355 |
| EBF4        | 0.704074678 | 0.63955867  | 0.064516008  | 4  | 356 |
| RNU2-37P    | 0.835954089 | 0.71373792  | 0.122216168  | 5  | 357 |
| SS18        | 0.194226183 | 0.121378905 | 0.072847278  | 8  | 358 |
| GPR26       | 0.819624317 | 0.707770236 | 0.111854081  | 7  | 359 |
| TICAM1      | 0.568669662 | 0.489600307 | 0.079069355  | 8  | 360 |
| FABP5       | 0.686353548 | 0.576706914 | 0.109646634  | 11 | 361 |
| CRIP3       | 0.544851152 | 0.467358312 | 0.07749284   | 9  | 362 |
| GPR146      | 0.550761561 | 0.482477452 | 0.068284109  | 8  | 363 |
| HIST1H2BPS2 | 0.571673726 | 0.467207607 | 0.104466118  | 16 | 364 |
| MIR4736     | 0.804280899 | 0.696013629 | 0.10826727   | 3  | 365 |
| ZNF442      | 0.276141438 | 0.212020302 | 0.064121137  | 8  | 366 |
| SH3BGR13    | 0.825647368 | 0.713705817 | 0.111941551  | 5  | 367 |
| DNAH8       | 0.873111752 | 0.756698952 | 0.1164128    | 3  | 368 |
| ZNF85       | 0.461073672 | 0.397022056 | 0.064051617  | 10 | 369 |
| RNU6-871P   | 0.291540538 | 0.382261083 | -0.090720545 | 1  | 370 |
| FBLL1       | 0.310580992 | 0.246685951 | 0.063895041  | 6  | 371 |
| MIR4710     | 0.289720034 | 0.225846314 | 0.06387372   | 3  | 372 |
| UBQLNL      | 0.339269032 | 0.499558035 | -0.160289004 | 3  | 373 |
| GRIK1       | 0.442251367 | 0.34243244  | 0.099818927  | 6  | 374 |
| SNHG12      | 0.86603745  | 0.749526834 | 0.116510615  | 1  | 375 |
| SYNE2       | 0.371206964 | 0.302659164 | 0.068547799  | 8  | 376 |
| SEMA5A      | 0.552169652 | 0.475939147 | 0.076230505  | 9  | 377 |
| MMD2        | 0.51622224  | 0.447996729 | 0.068225512  | 6  | 378 |
| RNU7-20P    | 0.665616918 | 0.562242113 | 0.103374805  | 1  | 379 |
| DMRT2       | 0.919659811 | 0.796482643 | 0.123177168  | 2  | 380 |
| ZNF69       | 0.78277629  | 0.683078214 | 0.099698076  | 13 | 381 |
| RAC2        | 0.476900989 | 0.409832331 | 0.067068658  | 7  | 382 |
| FSTL3       | 0.729987244 | 0.641328505 | 0.088658739  | 7  | 383 |
| HIST1H3H    | 0.671441716 | 0.602204476 | 0.06923724   | 9  | 384 |
| DDAH1       | 0.574663984 | 0.659115348 | -0.084451364 | 6  | 385 |
| MIR509-2    | 0.343185798 | 0.230476963 | 0.112708836  | 1  | 386 |
| HOXC9       | 0.571865768 | 0.479770692 | 0.092095076  | 9  | 387 |
| SHANK2      | 0.487618973 | 0.406287686 | 0.081331287  | 5  | 388 |
| MANSC4      | 0.735010759 | 0.665056624 | 0.069954135  | 4  | 389 |
| MLYCD       | 0.180260281 | 0.117183029 | 0.063077253  | 3  | 390 |
| IFI44       | 0.445539999 | 0.320774672 | 0.124765328  | 1  | 391 |
| IGHVII-20-1 | 0.824584284 | 0.714859768 | 0.109724516  | 1  | 392 |
| SLC15A4     | 0.297607584 | 0.234668291 | 0.062939293  | 12 | 393 |
| TRIM38      | 0.459042246 | 0.39189467  | 0.067147576  | 8  | 394 |
| RIC3        | 0.570231409 | 0.488255777 | 0.081975632  | 11 | 395 |
| GRM5        | 0.178120336 | 0.301966008 | -0.123845672 | 3  | 396 |

|           |             |             |              |    |     |
|-----------|-------------|-------------|--------------|----|-----|
| IFI30     | 0.595530509 | 0.511727157 | 0.083803352  | 6  | 397 |
| RN7SKP89  | 0.104974709 | 0.246773718 | -0.141799009 | 1  | 398 |
| NOD2      | 0.542618775 | 0.45822506  | 0.084393714  | 3  | 399 |
| IMPA1P    | 0.622529552 | 0.541018131 | 0.081511421  | 5  | 400 |
| RNU6-8    | 0.131318335 | 0.068756447 | 0.062561888  | 4  | 401 |
| FGF8      | 0.681230133 | 0.582328672 | 0.098901461  | 7  | 402 |
| CSF1      | 0.505059708 | 0.442539976 | 0.062519732  | 6  | 403 |
| C11orf21  | 0.826981867 | 0.71616187  | 0.110819997  | 4  | 404 |
| SEMA7A    | 0.378570138 | 0.316157554 | 0.062412584  | 7  | 405 |
| SAA3P     | 0.767999947 | 0.863675453 | -0.095675506 | 3  | 406 |
| C20orf112 | 0.352390016 | 0.289988558 | 0.062401458  | 4  | 407 |
| ATXN2L    | 0.243863813 | 0.181567839 | 0.062295974  | 6  | 408 |
| DUSP9     | 0.721788822 | 0.627965244 | 0.093823577  | 8  | 409 |
| MYEOV2    | 0.689673042 | 0.627417844 | 0.062255198  | 27 | 410 |
| LRRC37A7P | 0.816792045 | 0.708947291 | 0.107844754  | 3  | 411 |
| MIR3663   | 0.690615198 | 0.604906384 | 0.085708814  | 5  | 412 |
| MYO16     | 0.327176447 | 0.441262441 | -0.114085994 | 5  | 413 |
| HIST1H2AL | 0.56338411  | 0.461035861 | 0.10234825   | 15 | 414 |
| RPS29P22  | 0.73650387  | 0.63954923  | 0.09695464   | 1  | 415 |
| DUOX2     | 0.852109372 | 0.728159668 | 0.123949703  | 14 | 416 |
| FAM83F    | 0.787928422 | 0.686330645 | 0.101597777  | 6  | 417 |
| RASAL1    | 0.524882329 | 0.463196795 | 0.061685534  | 13 | 418 |
| TGIF2LY   | 0.358422375 | 0.524527194 | -0.166104819 | 2  | 419 |
| PHACTR3   | 0.836228784 | 0.73307816  | 0.103150625  | 4  | 420 |
| HSBP1L1   | 0.592337516 | 0.512859842 | 0.079477673  | 8  | 421 |
| UCK1      | 0.527104502 | 0.441412038 | 0.085692464  | 5  | 422 |
| HERC6     | 0.496964916 | 0.435339991 | 0.061624925  | 9  | 423 |
| ANGPTL2   | 0.699642865 | 0.578088323 | 0.121554542  | 3  | 424 |
| APCDD1L   | 0.679736232 | 0.588993773 | 0.090742459  | 11 | 425 |
| TXNDC5    | 0.254287315 | 0.192808387 | 0.061478928  | 5  | 426 |
| FAM213A   | 0.505668066 | 0.418681586 | 0.08698648   | 7  | 427 |
| RHBDD1    | 0.672721706 | 0.55703782  | 0.115683885  | 7  | 428 |
| KCNA5     | 0.745979332 | 0.652350456 | 0.093628876  | 6  | 429 |
| SLC9A9    | 0.548330419 | 0.486956358 | 0.061374061  | 2  | 430 |
| TBC1D14   | 0.380121773 | 0.317420036 | 0.062701736  | 10 | 431 |
| ZNF423    | 0.549812072 | 0.480076712 | 0.06973536   | 6  | 432 |
| DPY19L2P4 | 0.48141022  | 0.401390772 | 0.080019448  | 16 | 433 |
| IGSF10    | 0.772646534 | 0.841206227 | -0.068559693 | 6  | 434 |
| LRRC16B   | 0.405644617 | 0.344412819 | 0.061231799  | 5  | 435 |
| SNORA45   | 0.445971878 | 0.514411831 | -0.068439952 | 4  | 436 |
| PCDHGB6   | 0.815437264 | 0.721952013 | 0.093485251  | 6  | 437 |
| NQO1      | 0.180235294 | 0.114544544 | 0.065690751  | 8  | 438 |
| LIF       | 0.410057682 | 0.349128994 | 0.060928688  | 7  | 439 |
| DNAH11    | 0.706825857 | 0.621112378 | 0.085713479  | 9  | 440 |
| PDGFB     | 0.399557896 | 0.335424285 | 0.06413361   | 11 | 441 |
| HIST1H2BO | 0.688471757 | 0.597640401 | 0.090831356  | 14 | 442 |
| C6orf226  | 0.401636952 | 0.340965356 | 0.060671595  | 12 | 443 |
| COL4A2    | 0.6866036   | 0.625162409 | 0.061441191  | 2  | 444 |
| ANKRD37   | 0.275221288 | 0.205292364 | 0.069928925  | 4  | 445 |
| GRASP     | 0.814340563 | 0.713102923 | 0.10123764   | 8  | 446 |

|              |             |             |              |    |     |
|--------------|-------------|-------------|--------------|----|-----|
| SNORA35      | 0.21424092  | 0.341499474 | -0.127258554 | 4  | 447 |
| RNF144A-AS1  | 0.885930572 | 0.778635098 | 0.107295474  | 5  | 448 |
| BBOX1        | 0.497218449 | 0.600940532 | -0.103722083 | 4  | 449 |
| ANKRD34C     | 0.373560477 | 0.292030414 | 0.081530063  | 8  | 450 |
| OR5D13       | 0.336437279 | 0.493387455 | -0.156950176 | 2  | 451 |
| VCX2         | 0.68903071  | 0.796450067 | -0.107419357 | 3  | 452 |
| MDGA1        | 0.68656496  | 0.626514995 | 0.060049965  | 4  | 453 |
| FAM163A      | 0.659395505 | 0.581270662 | 0.078124843  | 13 | 454 |
| EMX1         | 0.536091718 | 0.458115619 | 0.077976099  | 8  | 455 |
| DNTTIP2      | 0.427816465 | 0.368023    | 0.059793465  | 4  | 456 |
| FAM5C        | 0.377217396 | 0.292693179 | 0.084524217  | 8  | 457 |
| LHX2         | 0.457361195 | 0.387279701 | 0.070081494  | 2  | 458 |
| ATP5LP7      | 0.816636211 | 0.712221698 | 0.104414514  | 2  | 459 |
| HMGB3P27     | 0.816636211 | 0.712221698 | 0.104414514  | 2  | 460 |
| TNFRSF13C    | 0.729585032 | 0.669867152 | 0.05971788   | 5  | 461 |
| BARHL2       | 0.356592404 | 0.290342504 | 0.066249899  | 12 | 462 |
| C9orf135-AS1 | 0.925987789 | 0.808794247 | 0.117193542  | 3  | 463 |
| C1orf194     | 0.665744679 | 0.5829498   | 0.082794879  | 10 | 464 |
| C21orf128    | 0.728185204 | 0.653210094 | 0.07497511   | 6  | 465 |
| SRP72        | 0.137699012 | 0.078181015 | 0.059517997  | 6  | 466 |
| GPRASP1      | 0.697014556 | 0.61164841  | 0.085366146  | 10 | 467 |
| FOXB2        | 0.496492999 | 0.417882129 | 0.07861087   | 6  | 468 |
| PLA2G7       | 0.395161232 | 0.327823224 | 0.067338008  | 18 | 469 |
| TMEM140      | 0.591179045 | 0.526016824 | 0.065162221  | 11 | 470 |
| FERMT2       | 0.51307464  | 0.453695629 | 0.059379011  | 6  | 471 |
| MIR4513      | 0.893157797 | 0.779721542 | 0.113436255  | 1  | 472 |
| NKX2-5       | 0.663973084 | 0.591190446 | 0.072782639  | 12 | 473 |
| SYTL1        | 0.454499494 | 0.389241763 | 0.065257732  | 8  | 474 |
| TRPM3        | 0.149682228 | 0.210255206 | -0.060572978 | 4  | 475 |
| STRA13       | 0.430842288 | 0.371587026 | 0.059255262  | 4  | 476 |
| CHODL-AS1    | 0.194811444 | 0.355853066 | -0.161041622 | 2  | 477 |
| CLMP         | 0.862352772 | 0.760257566 | 0.102095205  | 10 | 478 |
| PRTN3        | 0.784804071 | 0.697067404 | 0.087736667  | 8  | 479 |
| SLC29A1      | 0.698406307 | 0.609842736 | 0.088563571  | 12 | 480 |
| XKR5         | 0.692061276 | 0.617442891 | 0.074618385  | 11 | 481 |
| RAP1GAP      | 0.574433172 | 0.511544661 | 0.062888512  | 8  | 482 |
| APOOP5       | 0.439738772 | 0.553831864 | -0.114093091 | 8  | 483 |
| PPM1M        | 0.743635832 | 0.654564422 | 0.08907141   | 11 | 484 |
| TCTEX1D4     | 0.706661004 | 0.631827895 | 0.074833109  | 7  | 485 |
| IGFBPL1      | 0.701290995 | 0.635324776 | 0.065966218  | 4  | 486 |
| PCDH17       | 0.320041519 | 0.247137122 | 0.072904397  | 6  | 487 |
| UAP1L1       | 0.595341965 | 0.527014559 | 0.068327406  | 4  | 488 |
| MIR3146      | 0.722407804 | 0.627763387 | 0.094644417  | 1  | 489 |
| PHF19        | 0.46393964  | 0.404970964 | 0.058968677  | 6  | 490 |
| OR14C36      | 0.294308369 | 0.407864746 | -0.113556377 | 2  | 491 |
| HIST1H3J     | 0.636108247 | 0.541434323 | 0.094673924  | 16 | 492 |
| CGA          | 0.616854526 | 0.689773913 | -0.072919387 | 3  | 493 |
| HRC          | 0.722656638 | 0.648153933 | 0.074502705  | 6  | 494 |
| HIST1H2APS4  | 0.83915072  | 0.734265272 | 0.104885448  | 16 | 495 |
| RPL23AP78    | 0.912923938 | 0.802704088 | 0.11021985   | 2  | 496 |

|           |             |             |              |   |     |
|-----------|-------------|-------------|--------------|---|-----|
| CEACAM18  | 0.491517358 | 0.608166186 | -0.116648828 | 4 | 497 |
| TMEM154   | 0.63761152  | 0.539353702 | 0.098257818  | 9 | 498 |
| LINC00460 | 0.801933354 | 0.729169492 | 0.072763862  | 7 | 499 |
| ATP1A3    | 0.158174373 | 0.099734727 | 0.058439646  | 4 | 500 |

**Supplementary Table S11. List of the 500 top-ranked, gene symbol-associated differentially methylated gene bodies after *TET* triple knockdown.**

| gene_symbol | beta.GFP_siRNA | beta.GFP_scramble | difference   | num.sites | rank |
|-------------|----------------|-------------------|--------------|-----------|------|
| RARRES2P5   | 0.371296702    | 0.630335355       | -0.259038653 | 1         | 1    |
| MIR3678     | 0.422579473    | 0.15118847        | 0.271391002  | 1         | 2    |
| OXCT1-AS1   | 0.475758851    | 0.294603602       | 0.181155249  | 9         | 3    |
| MIR4710     | 0.466140878    | 0.285173084       | 0.180967794  | 1         | 4    |
| NSUN5P2     | 0.7388574      | 0.554709766       | 0.184147634  | 5         | 5    |
| KRTAP5-5    | 0.272022226    | 0.440597404       | -0.168575177 | 1         | 6    |
| RARRES2P9   | 0.376919186    | 0.600236185       | -0.223316999 | 1         | 7    |
| OR51B2      | 0.44200018     | 0.686598145       | -0.244597965 | 2         | 8    |
| SNORD114-12 | 0.534356252    | 0.359871999       | 0.174484253  | 1         | 9    |
| OR4L1       | 0.403942638    | 0.594660705       | -0.190718067 | 1         | 10   |
| SNORD115-48 | 0.433408437    | 0.658599551       | -0.225191113 | 1         | 11   |
| NAP1L3      | 0.557937014    | 0.382656951       | 0.175280063  | 2         | 12   |
| SPANXA2-OT1 | 0.575277151    | 0.393644772       | 0.181632379  | 1         | 13   |
| OR5H14      | 0.251469318    | 0.412683863       | -0.161214546 | 1         | 14   |
| SNORD38A    | 0.270286469    | 0.389080437       | -0.118793968 | 1         | 15   |
| HNRNPDP2    | 0.826573871    | 0.584769795       | 0.241804076  | 1         | 16   |
| SLC25A1P4   | 0.522522481    | 0.659570616       | -0.137048135 | 5         | 17   |
| SMEK3P      | 0.275317216    | 0.530657816       | -0.2553406   | 1         | 18   |
| MIR374A     | 0.632229333    | 0.86030644        | -0.228077107 | 1         | 19   |
| ZNF626      | 0.434414043    | 0.305665353       | 0.12874869   | 1         | 20   |
| OR5AP2      | 0.410615066    | 0.618832203       | -0.208217137 | 1         | 21   |
| OR4X2       | 0.312089001    | 0.596018714       | -0.283929713 | 1         | 22   |
| SNORD114-26 | 0.615596636    | 0.455128967       | 0.160467669  | 1         | 23   |
| MBD3L2      | 0.609702782    | 0.816892638       | -0.207189856 | 1         | 24   |
| DNM1P50     | 0.410288468    | 0.642215188       | -0.23192672  | 1         | 25   |
| OR4S1       | 0.654068097    | 0.488586127       | 0.16548197   | 1         | 26   |
| LINC00664   | 0.549853627    | 0.678951077       | -0.12909745  | 3         | 27   |
| CD274       | 0.462231452    | 0.359470174       | 0.102761278  | 3         | 28   |
| MIR648      | 0.52371044     | 0.399042147       | 0.124668293  | 1         | 29   |
| RN7SL832P   | 0.469549232    | 0.368525564       | 0.101023668  | 5         | 30   |
| RHOT1P3     | 0.555447434    | 0.716516607       | -0.161069173 | 1         | 31   |
| CD300E      | 0.459117303    | 0.567617718       | -0.108500415 | 3         | 32   |
| IFI44       | 0.692783086    | 0.540085647       | 0.152697438  | 1         | 33   |
| MIR4724     | 0.453431012    | 0.624707014       | -0.171276002 | 1         | 34   |
| IRF5        | 0.595697815    | 0.5003366         | 0.095361215  | 21        | 35   |
| KIAA0125    | 0.188952991    | 0.291685577       | -0.102732585 | 1         | 36   |
| ISL1        | 0.514032258    | 0.394460174       | 0.119572084  | 27        | 37   |
| ARL2        | 0.588421737    | 0.4948979         | 0.093523837  | 6         | 38   |
| IGFL1       | 0.611509741    | 0.766367049       | -0.154857308 | 3         | 39   |
| RNASE6      | 0.734130018    | 0.601184613       | 0.132945405  | 3         | 40   |
| OR2I1P      | 0.646591995    | 0.51502437        | 0.131567626  | 35        | 41   |
| KRT18P13    | 0.685974907    | 0.859897409       | -0.173922502 | 1         | 42   |
| HIST1H2AL   | 0.60637817     | 0.464564059       | 0.141814112  | 7         | 43   |
| C17orf50    | 0.476622351    | 0.387301543       | 0.089320808  | 4         | 44   |
| KRTAP9-2    | 0.174010562    | 0.304226198       | -0.130215636 | 1         | 45   |
| HIST1H3D    | 0.550301564    | 0.447648196       | 0.102653367  | 8         | 46   |

|              |             |             |              |    |    |
|--------------|-------------|-------------|--------------|----|----|
| SPANXN5      | 0.438957464 | 0.546618754 | -0.10766129  | 4  | 47 |
| DRAP1        | 0.550870664 | 0.462039512 | 0.088831153  | 4  | 48 |
| ASCL4        | 0.725003662 | 0.602387798 | 0.122615864  | 8  | 49 |
| HIST1H2AE    | 0.642732764 | 0.523954527 | 0.118778237  | 5  | 50 |
| UBE2C        | 0.568000195 | 0.480324449 | 0.087675746  | 12 | 51 |
| MIR125B1     | 0.318284026 | 0.406567608 | -0.088283582 | 1  | 52 |
| CCDC54       | 0.592851016 | 0.487300401 | 0.105550614  | 1  | 53 |
| EHHADH-AS1   | 0.583076704 | 0.451189028 | 0.131887676  | 1  | 54 |
| OR51I2       | 0.561200172 | 0.661738183 | -0.100538011 | 2  | 55 |
| ANKRD20A14P  | 0.612554454 | 0.742738929 | -0.130184475 | 1  | 56 |
| SLC2A3       | 0.472470291 | 0.345519383 | 0.126950908  | 3  | 57 |
| G0S2         | 0.638637902 | 0.532759705 | 0.105878197  | 6  | 58 |
| IL10RB-AS1   | 0.749480497 | 0.644478395 | 0.105002102  | 5  | 59 |
| BARHL2       | 0.551900856 | 0.467587233 | 0.084313623  | 10 | 60 |
| ZNF702P      | 0.607736696 | 0.520156526 | 0.08758017   | 17 | 61 |
| NXPE4        | 0.48797618  | 0.593840584 | -0.105864404 | 2  | 62 |
| LINC00242    | 0.581942761 | 0.502166796 | 0.079775965  | 16 | 63 |
| ABCA10       | 0.705940899 | 0.521642589 | 0.18429831   | 2  | 64 |
| GPR112       | 0.456647354 | 0.540829135 | -0.084181781 | 2  | 65 |
| MIR34B       | 0.606859772 | 0.50309214  | 0.103767632  | 1  | 66 |
| OR6Q1        | 0.102419209 | 0.212024585 | -0.109605376 | 1  | 67 |
| MIR4740      | 0.903307374 | 0.75067391  | 0.152633464  | 1  | 68 |
| CLCF1        | 0.519493831 | 0.441062755 | 0.078431075  | 13 | 69 |
| SOX1         | 0.73604157  | 0.638538816 | 0.097502755  | 16 | 70 |
| ZNF718       | 0.41810905  | 0.525035982 | -0.106926932 | 5  | 71 |
| SLC31A2      | 0.663459203 | 0.52639935  | 0.137059853  | 5  | 72 |
| CD70         | 0.698141548 | 0.599392721 | 0.098748827  | 11 | 73 |
| MARCKSL1P2   | 0.903156347 | 0.754030442 | 0.149125905  | 1  | 74 |
| OR52A1       | 0.473205979 | 0.572613572 | -0.099407593 | 3  | 75 |
| HIST1H2AD    | 0.632398494 | 0.526381703 | 0.106016791  | 2  | 76 |
| HIST1H2BF    | 0.534490645 | 0.452054226 | 0.082436419  | 5  | 77 |
| C6orf164     | 0.713877763 | 0.597036957 | 0.116840807  | 1  | 78 |
| RARRES2P8    | 0.582138403 | 0.672387558 | -0.090249155 | 3  | 79 |
| ZNF253       | 0.599794678 | 0.496694673 | 0.103100006  | 5  | 80 |
| PLK5         | 0.810420268 | 0.735436397 | 0.074983871  | 9  | 81 |
| HIST1H1PS1   | 0.933383801 | 0.78523144  | 0.148152361  | 3  | 82 |
| MIR1258      | 0.127532753 | 0.052663063 | 0.07486969   | 1  | 83 |
| OMD          | 0.606209854 | 0.721301208 | -0.115091354 | 1  | 84 |
| VAV3-AS1     | 0.481981951 | 0.401228536 | 0.080753415  | 10 | 85 |
| LIPG         | 0.472283811 | 0.397821212 | 0.074462599  | 17 | 86 |
| OR8U1        | 0.308026452 | 0.464507587 | -0.156481134 | 1  | 87 |
| MIR30A       | 0.275784985 | 0.473697456 | -0.19791247  | 1  | 88 |
| KRTAP10-12   | 0.547729028 | 0.649709688 | -0.10198066  | 1  | 89 |
| PATZ1        | 0.66054142  | 0.586930578 | 0.073610842  | 9  | 90 |
| GAD2         | 0.710545249 | 0.627789535 | 0.082755714  | 15 | 91 |
| ARHGAP31-AS1 | 0.466907648 | 0.393697071 | 0.073210577  | 5  | 92 |
| TUBB8P9      | 0.484069941 | 0.573834316 | -0.089764375 | 1  | 93 |
| CH25H        | 0.639566818 | 0.548721863 | 0.090844954  | 5  | 94 |
| RNF224       | 0.266392626 | 0.193398704 | 0.072993922  | 2  | 95 |
| BSX          | 0.732321133 | 0.636706064 | 0.095615069  | 14 | 96 |

|              |             |             |              |    |     |
|--------------|-------------|-------------|--------------|----|-----|
| ANKDD1B      | 0.621660409 | 0.544466929 | 0.07719348   | 10 | 97  |
| MAGI1-AS1    | 0.581603825 | 0.654141098 | -0.072537272 | 2  | 98  |
| C1orf68      | 0.532877214 | 0.637351893 | -0.10447468  | 1  | 99  |
| RIPPLY2      | 0.588069722 | 0.499193343 | 0.088876379  | 7  | 100 |
| SLFN13       | 0.697440649 | 0.61859576  | 0.078844889  | 8  | 101 |
| CHODL-AS1    | 0.450628008 | 0.575317198 | -0.124689191 | 1  | 102 |
| TGFBR3L      | 0.640134379 | 0.568028121 | 0.072106259  | 8  | 103 |
| MIR663B      | 0.899294699 | 0.761423895 | 0.137870803  | 1  | 104 |
| SEPN1        | 0.683045113 | 0.611218565 | 0.071826548  | 6  | 105 |
| PTGR1        | 0.588839604 | 0.509616864 | 0.07922274   | 4  | 106 |
| DECR1        | 0.83809195  | 0.705997599 | 0.132094351  | 6  | 107 |
| ASCL1        | 0.677114043 | 0.580613605 | 0.096500437  | 12 | 108 |
| NEURL2       | 0.675352082 | 0.58965473  | 0.085697352  | 8  | 109 |
| LINC00677    | 0.3504436   | 0.276993782 | 0.073449818  | 1  | 110 |
| SH3BGR3      | 0.431348382 | 0.360196055 | 0.071152327  | 9  | 111 |
| TRAT1        | 0.260941823 | 0.403044926 | -0.142103103 | 1  | 112 |
| KRTAP13-3    | 0.178955271 | 0.3279866   | -0.149031329 | 2  | 113 |
| C10orf71-AS1 | 0.647492953 | 0.734739241 | -0.087246288 | 7  | 114 |
| HMX3         | 0.767920905 | 0.661571439 | 0.106349466  | 11 | 115 |
| TRIM74       | 0.949169724 | 0.808664335 | 0.140505389  | 1  | 116 |
| OR13F1       | 0.34882378  | 0.595845443 | -0.247021663 | 1  | 117 |
| ZDHHC20P4    | 0.782012358 | 0.684301236 | 0.097711122  | 2  | 118 |
| BNIP3P1      | 0.614610691 | 0.499083291 | 0.115527401  | 1  | 119 |
| EGFL6        | 0.815725694 | 0.699805666 | 0.115920028  | 6  | 120 |
| SSX6         | 0.855967859 | 0.730884876 | 0.125082982  | 1  | 121 |
| DUSP26       | 0.677488494 | 0.595819875 | 0.081668619  | 11 | 122 |
| MIR4655      | 0.842110068 | 0.719087316 | 0.123022752  | 1  | 123 |
| MAST4-AS1    | 0.379657843 | 0.196805441 | 0.182852402  | 1  | 124 |
| IL17RB       | 0.737311722 | 0.646102745 | 0.091208978  | 5  | 125 |
| IGFL4        | 0.51050482  | 0.636572551 | -0.126067731 | 8  | 126 |
| SPAG4        | 0.431189438 | 0.362766398 | 0.06842304   | 12 | 127 |
| LINC00877    | 0.702786402 | 0.624414694 | 0.078371708  | 15 | 128 |
| CTSE         | 0.806552848 | 0.69897062  | 0.107582228  | 3  | 129 |
| PABPC1P1     | 0.675503276 | 0.577558812 | 0.097944464  | 1  | 130 |
| LINC00152    | 0.698060979 | 0.629775072 | 0.068285907  | 3  | 131 |
| GBP4         | 0.506528942 | 0.413354941 | 0.093174     | 8  | 132 |
| ANKRD18EP    | 0.244070825 | 0.386553242 | -0.142482417 | 1  | 133 |
| RASD1        | 0.656223856 | 0.588080359 | 0.068143498  | 6  | 134 |
| OR4C15       | 0.278943405 | 0.526750446 | -0.247807042 | 1  | 135 |
| MIR146A      | 0.578964304 | 0.646596061 | -0.067631757 | 4  | 136 |
| LINC00113    | 0.317898832 | 0.46974829  | -0.151849458 | 1  | 137 |
| PNLIPRP3     | 0.339638275 | 0.438763872 | -0.099125597 | 1  | 138 |
| IFITM1       | 0.78471694  | 0.692671445 | 0.092045495  | 9  | 139 |
| LINC00620    | 0.660607707 | 0.59276735  | 0.067840357  | 11 | 140 |
| GALNT4       | 0.807729215 | 0.717774854 | 0.089954361  | 2  | 141 |
| LCE2A        | 0.201914135 | 0.299977353 | -0.098063218 | 3  | 142 |
| ZNF85        | 0.405320059 | 0.318247508 | 0.087072552  | 6  | 143 |
| TCN2         | 0.6756747   | 0.586378747 | 0.089295953  | 10 | 144 |
| HIST1H2BI    | 0.838418938 | 0.721658012 | 0.116760926  | 9  | 145 |
| SOX10        | 0.908208054 | 0.841857321 | 0.066350734  | 11 | 146 |

|            |             |             |              |    |     |
|------------|-------------|-------------|--------------|----|-----|
| GPR151     | 0.249807064 | 0.397434209 | -0.147627145 | 1  | 147 |
| TMCO5B     | 0.846367824 | 0.729329157 | 0.117038667  | 1  | 148 |
| ZFP36L2    | 0.406364664 | 0.34044461  | 0.065920054  | 15 | 149 |
| HELT       | 0.750413192 | 0.647023203 | 0.103389989  | 14 | 150 |
| DHH        | 0.719040191 | 0.621735376 | 0.097304815  | 17 | 151 |
| C8orf56    | 0.724788279 | 0.636925476 | 0.087862803  | 12 | 152 |
| ZNF75A     | 0.787322827 | 0.68940989  | 0.097912937  | 7  | 153 |
| UGT2B10    | 0.262270701 | 0.489231258 | -0.226960557 | 1  | 154 |
| SIGLEC17P  | 0.774300339 | 0.642356397 | 0.131943942  | 1  | 155 |
| OR4S2      | 0.355247561 | 0.550900911 | -0.19565335  | 1  | 156 |
| ANKRD36BP2 | 0.790914889 | 0.692875067 | 0.098039822  | 6  | 157 |
| NBN        | 0.63933398  | 0.55241431  | 0.086919671  | 24 | 158 |
| SNORD64    | 0.467098066 | 0.630989884 | -0.163891818 | 2  | 159 |
| MBD3L5     | 0.780855012 | 0.902938336 | -0.122083324 | 1  | 160 |
| ARL11      | 0.760164622 | 0.669028443 | 0.09113618   | 7  | 161 |
| DPY19L2P4  | 0.542307109 | 0.456629367 | 0.085677742  | 3  | 162 |
| VPS9D1-AS1 | 0.886390495 | 0.776898782 | 0.109491713  | 5  | 163 |
| MIR184     | 0.877820999 | 0.759683484 | 0.118137515  | 1  | 164 |
| MIR1914    | 0.901426725 | 0.780148334 | 0.121278391  | 1  | 165 |
| LINC00575  | 0.558573664 | 0.697128579 | -0.138554915 | 1  | 166 |
| EDN1       | 0.620129533 | 0.550486574 | 0.069642959  | 3  | 167 |
| SOX14      | 0.782000372 | 0.675162453 | 0.106837919  | 5  | 168 |
| MIR501     | 0.800894794 | 0.685803086 | 0.115091709  | 1  | 169 |
| LINC00665  | 0.528919411 | 0.463929954 | 0.064989457  | 5  | 170 |
| SNORD3D    | 0.225060269 | 0.160985699 | 0.06407457   | 2  | 171 |
| HIST1H3A   | 0.759078824 | 0.658316123 | 0.100762701  | 3  | 172 |
| KRTAP4-5   | 0.622929814 | 0.718212358 | -0.095282544 | 1  | 173 |
| URAHP      | 0.718892991 | 0.632878425 | 0.086014566  | 5  | 174 |
| TRBJ2-3    | 0.560906522 | 0.476448751 | 0.084457771  | 1  | 175 |
| OXTR       | 0.753384616 | 0.688020795 | 0.065363821  | 14 | 176 |
| RPS29P22   | 0.73650387  | 0.63954923  | 0.09695464   | 1  | 177 |
| GRAP2      | 0.830195905 | 0.721556973 | 0.108638932  | 2  | 178 |
| C2orf50    | 0.713532824 | 0.641878496 | 0.071654328  | 5  | 179 |
| UCN2       | 0.745414016 | 0.83876877  | -0.093354754 | 3  | 180 |
| HIST1H2BO  | 0.698628449 | 0.610106748 | 0.088521701  | 6  | 181 |
| MROH6      | 0.57619075  | 0.513819803 | 0.062370946  | 21 | 182 |
| FGFBP2     | 0.783885657 | 0.70241673  | 0.081468927  | 10 | 183 |
| CD163      | 0.558732453 | 0.642498208 | -0.083765754 | 1  | 184 |
| GALNT14    | 0.668326034 | 0.606195838 | 0.062130196  | 24 | 185 |
| ANKRD20A7P | 0.526995581 | 0.457992684 | 0.069002897  | 2  | 186 |
| SLC22A20   | 0.749915759 | 0.661378668 | 0.08853709   | 7  | 187 |
| ACCS       | 0.636679285 | 0.549050039 | 0.087629246  | 11 | 188 |
| MIR548B    | 0.661161748 | 0.576092738 | 0.08506901   | 1  | 189 |
| ZNF730     | 0.445000197 | 0.349520957 | 0.09547924   | 9  | 190 |
| CD46P1     | 0.654146479 | 0.592769365 | 0.061377114  | 5  | 191 |
| USP4       | 0.380960994 | 0.319630653 | 0.06133034   | 12 | 192 |
| INCA1      | 0.530881625 | 0.469672717 | 0.061208908  | 7  | 193 |
| BCRP8      | 0.567522563 | 0.490655948 | 0.076866615  | 4  | 194 |
| C19orf59   | 0.826908875 | 0.732378617 | 0.094530258  | 7  | 195 |
| SULT1C4    | 0.71266476  | 0.617612113 | 0.095052647  | 4  | 196 |



|            |             |             |              |    |     |
|------------|-------------|-------------|--------------|----|-----|
| HCST       | 0.731430547 | 0.65351235  | 0.077918197  | 2  | 197 |
| PHOSPHO1   | 0.697418332 | 0.613350682 | 0.08406765   | 11 | 198 |
| DEFB125    | 0.375390026 | 0.464201456 | -0.08881143  | 2  | 199 |
| ADAM28     | 0.77625242  | 0.698875968 | 0.077376452  | 4  | 200 |
| SP100      | 0.886488599 | 0.776503051 | 0.109985549  | 6  | 201 |
| ATP5LP7    | 0.755789951 | 0.66103973  | 0.094750221  | 1  | 202 |
| TCF24      | 0.432834901 | 0.361853067 | 0.070981834  | 10 | 203 |
| OR13C8     | 0.34724931  | 0.476119298 | -0.128869988 | 1  | 204 |
| OR6K6      | 0.257046351 | 0.401930025 | -0.144883674 | 2  | 205 |
| DUOXA2     | 0.865036788 | 0.76083219  | 0.104204598  | 15 | 206 |
| TMEM238    | 0.87492858  | 0.766168399 | 0.108760181  | 3  | 207 |
| KLF2       | 0.620435476 | 0.550155305 | 0.070280171  | 7  | 208 |
| CCDC78     | 0.660362426 | 0.583832246 | 0.07653018   | 11 | 209 |
| AMOT       | 0.540531018 | 0.618600114 | -0.078069096 | 12 | 210 |
| C7orf69    | 0.77427217  | 0.850154152 | -0.075881982 | 4  | 211 |
| RNF126P1   | 0.891091178 | 0.781415147 | 0.109676031  | 5  | 212 |
| GPR97      | 0.833709886 | 0.749407625 | 0.084302261  | 3  | 213 |
| RUVBL1-AS1 | 0.854005528 | 0.749860128 | 0.104145399  | 7  | 214 |
| ZIC4       | 0.79749159  | 0.695917213 | 0.101574377  | 65 | 215 |
| C20orf201  | 0.715893612 | 0.627343777 | 0.088549835  | 1  | 216 |
| NT5C1A     | 0.790719149 | 0.731546031 | 0.059173118  | 5  | 217 |
| MBOAT4     | 0.68359969  | 0.546443384 | 0.137156306  | 1  | 218 |
| IL11       | 0.538997558 | 0.479991929 | 0.059005628  | 6  | 219 |
| PHLDA1     | 0.268937572 | 0.210000863 | 0.058936708  | 8  | 220 |
| FPR3       | 0.837707074 | 0.733781271 | 0.103925803  | 3  | 221 |
| SLFN12     | 0.698788799 | 0.614994678 | 0.083794121  | 12 | 222 |
| ZNF597     | 0.676892355 | 0.588663434 | 0.088228921  | 8  | 223 |
| CNN2P7     | 0.700738847 | 0.798155267 | -0.09741642  | 1  | 224 |
| SNORA57    | 0.850358841 | 0.746836232 | 0.103522609  | 1  | 225 |
| TMBIM1     | 0.557397712 | 0.495834549 | 0.061563163  | 13 | 226 |
| KRTAP15-1  | 0.177728157 | 0.316648835 | -0.138920678 | 1  | 227 |
| TSTD1      | 0.7957507   | 0.706860436 | 0.088890264  | 8  | 228 |
| LRRC52     | 0.801043141 | 0.721345611 | 0.07969753   | 7  | 229 |
| DEFB122    | 0.745590747 | 0.848001828 | -0.102411081 | 1  | 230 |
| TAGLN3     | 0.854220513 | 0.744487117 | 0.109733395  | 16 | 231 |
| MIR365A    | 0.93612387  | 0.82375336  | 0.11237051   | 1  | 232 |
| TMEM233    | 0.571630792 | 0.49666714  | 0.074963652  | 12 | 233 |
| BPIFA3     | 0.890482549 | 0.78364568  | 0.106836869  | 1  | 234 |
| SNORD116-1 | 0.299401909 | 0.477590116 | -0.178188207 | 2  | 235 |
| SIX2       | 0.876108178 | 0.774324597 | 0.101783581  | 14 | 236 |
| B3GNT9     | 0.899586701 | 0.797590006 | 0.101996695  | 9  | 237 |
| ENO2       | 0.541404809 | 0.483848097 | 0.057556712  | 15 | 238 |
| KRTAP3-3   | 0.566222632 | 0.631205955 | -0.064983323 | 2  | 239 |
| HOXB5      | 0.553893143 | 0.473435724 | 0.080457419  | 24 | 240 |
| OR4F5      | 0.756368899 | 0.665798433 | 0.090570466  | 1  | 241 |
| SETDB1     | 0.515109152 | 0.457686177 | 0.057422975  | 5  | 242 |
| CTSW       | 0.887999661 | 0.782373574 | 0.105626087  | 3  | 243 |
| SNORA69    | 0.207048927 | 0.387104346 | -0.18005542  | 1  | 244 |
| C6orf183   | 0.595620707 | 0.693708169 | -0.098087463 | 2  | 245 |
| MEIS1-AS2  | 0.852617341 | 0.723733258 | 0.128884083  | 9  | 246 |

|             |             |             |              |     |     |
|-------------|-------------|-------------|--------------|-----|-----|
| ZNF66       | 0.210000697 | 0.267286504 | -0.057285807 | 1   | 247 |
| PNPLA4      | 0.441556025 | 0.3678369   | 0.073719125  | 13  | 248 |
| KRTAP1-3    | 0.788951097 | 0.895594835 | -0.106643738 | 1   | 249 |
| MIR574      | 0.765879019 | 0.649644026 | 0.116234994  | 1   | 250 |
| MT1E        | 0.880418618 | 0.776323018 | 0.1040956    | 6   | 251 |
| CEBPD       | 0.485841708 | 0.424243855 | 0.061597853  | 9   | 252 |
| ZNRF1       | 0.679524354 | 0.613101715 | 0.066422639  | 20  | 253 |
| AGFG2       | 0.604550767 | 0.539470683 | 0.065080084  | 6   | 254 |
| SPARC       | 0.848389026 | 0.761606232 | 0.086782794  | 12  | 255 |
| MIR138-1    | 0.892727259 | 0.787352115 | 0.105375144  | 1   | 256 |
| RN7SKP89    | 0.104974709 | 0.246773718 | -0.141799009 | 1   | 257 |
| TMEM140     | 0.79842021  | 0.719686529 | 0.078733681  | 9   | 258 |
| MIR9-3      | 0.870200637 | 0.754322127 | 0.11587851   | 2   | 259 |
| OTOL1       | 0.192073979 | 0.316247165 | -0.124173186 | 2   | 260 |
| KRT84       | 0.702165032 | 0.778985797 | -0.076820765 | 3   | 261 |
| C1QTNF2     | 0.631104279 | 0.574813483 | 0.056290796  | 6   | 262 |
| CD34        | 0.667174663 | 0.5971126   | 0.070062063  | 14  | 263 |
| C1orf56     | 0.614455871 | 0.558273858 | 0.056182014  | 7   | 264 |
| TEX26       | 0.842309511 | 0.756899987 | 0.085409524  | 3   | 265 |
| KCNC2       | 0.574667027 | 0.477330566 | 0.097336461  | 15  | 266 |
| ATL3        | 0.761029576 | 0.675985294 | 0.085044282  | 21  | 267 |
| FOXD4L1     | 0.696044806 | 0.609833658 | 0.086211148  | 5   | 268 |
| KRTAP10-2   | 0.728587576 | 0.644181489 | 0.084406087  | 1   | 269 |
| C19orf45    | 0.785525817 | 0.716920645 | 0.068605172  | 12  | 270 |
| OR51F1      | 0.193699846 | 0.390898716 | -0.197198871 | 1   | 271 |
| SH2D1B      | 0.708799263 | 0.641963839 | 0.066835424  | 3   | 272 |
| OR10R2      | 0.736787206 | 0.832561186 | -0.09577398  | 1   | 273 |
| LHX5        | 0.731845953 | 0.651225443 | 0.08062051   | 37  | 274 |
| LINC00568   | 0.157464866 | 0.097949715 | 0.059515152  | 2   | 275 |
| CLPSL2      | 0.179644198 | 0.091394491 | 0.088249706  | 1   | 276 |
| FKBP11      | 0.732925257 | 0.650857515 | 0.082067742  | 19  | 277 |
| CYP4A22-AS1 | 0.680169161 | 0.747407829 | -0.067238667 | 4   | 278 |
| BTC         | 0.729505203 | 0.646278464 | 0.08322674   | 6   | 279 |
| C16orf86    | 0.71481248  | 0.658980224 | 0.055832256  | 5   | 280 |
| MTND2P28    | 0.394288225 | 0.339051696 | 0.055236529  | 1   | 281 |
| OR1S1       | 0.621446865 | 0.743326071 | -0.121879206 | 1   | 282 |
| CLIC3       | 0.692781369 | 0.637579312 | 0.055202058  | 7   | 283 |
| ZNF878      | 0.573714718 | 0.499648285 | 0.074066433  | 8   | 284 |
| ZIC1        | 0.812040644 | 0.716344792 | 0.095695852  | 125 | 285 |
| SRRD        | 0.775053569 | 0.719877964 | 0.055175604  | 5   | 286 |
| C1orf194    | 0.518990006 | 0.461914312 | 0.057075694  | 10  | 287 |
| C1QA        | 0.810666506 | 0.740965061 | 0.069701445  | 5   | 288 |
| SSTR1       | 0.540593956 | 0.448156009 | 0.092437947  | 14  | 289 |
| MIXL1       | 0.701017921 | 0.625063956 | 0.075953965  | 5   | 290 |
| C3orf80     | 0.426153869 | 0.359608798 | 0.066545071  | 5   | 291 |
| OR6K3       | 0.172863936 | 0.366433603 | -0.193569666 | 1   | 292 |
| MBLAC1      | 0.371216648 | 0.316432411 | 0.054784237  | 7   | 293 |
| TCF21       | 0.812436116 | 0.72416286  | 0.088273257  | 20  | 294 |
| ARAP1-AS2   | 0.655632757 | 0.739497289 | -0.083864532 | 1   | 295 |
| IFITM2      | 0.775661851 | 0.700505902 | 0.075155948  | 22  | 296 |

|              |             |             |              |    |     |
|--------------|-------------|-------------|--------------|----|-----|
| PRTN3        | 0.762863697 | 0.698723227 | 0.064140469  | 14 | 297 |
| RHOT1P2      | 0.578292671 | 0.661853422 | -0.083560751 | 1  | 298 |
| OR51G1       | 0.281028392 | 0.416956467 | -0.135928075 | 1  | 299 |
| ZNF319       | 0.779448969 | 0.716132986 | 0.063315984  | 11 | 300 |
| PPAP2C       | 0.856064482 | 0.773997435 | 0.082067047  | 13 | 301 |
| OR5D13       | 0.336437279 | 0.493387455 | -0.156950176 | 2  | 302 |
| KIRREL3-AS3  | 0.479883533 | 0.416214058 | 0.063669476  | 9  | 303 |
| NKX2-5       | 0.583210771 | 0.51554489  | 0.067665881  | 15 | 304 |
| WDR5B        | 0.157972807 | 0.093171263 | 0.064801544  | 3  | 305 |
| GNAT1        | 0.724357111 | 0.660802681 | 0.06355443   | 7  | 306 |
| CNTN4-AS1    | 0.59532262  | 0.717451551 | -0.122128931 | 3  | 307 |
| RLN2         | 0.588487338 | 0.518006559 | 0.070480778  | 2  | 308 |
| ULBP1        | 0.638072784 | 0.558354977 | 0.079717807  | 12 | 309 |
| ATXN8OS      | 0.673903504 | 0.57931575  | 0.094587754  | 12 | 310 |
| MIR518C      | 0.141911868 | 0.258660866 | -0.116748998 | 1  | 311 |
| RAC2         | 0.585248814 | 0.513338877 | 0.071909937  | 6  | 312 |
| LINC00596    | 0.086816244 | 0.177746874 | -0.09093063  | 1  | 313 |
| SIX3-AS1     | 0.902726974 | 0.803700959 | 0.099026015  | 7  | 314 |
| IFI30        | 0.407579499 | 0.354109377 | 0.053470122  | 13 | 315 |
| MIR330       | 0.151762802 | 0.098499971 | 0.053262831  | 1  | 316 |
| MIR106B      | 0.87321627  | 0.779855105 | 0.093361165  | 2  | 317 |
| IGF2-AS      | 0.597810805 | 0.535315804 | 0.062495001  | 35 | 318 |
| TSPY11P      | 0.29754117  | 0.242226944 | 0.055314226  | 1  | 319 |
| TRAF3IP2     | 0.547443045 | 0.494345716 | 0.053097328  | 23 | 320 |
| ENDOG        | 0.658068344 | 0.605025221 | 0.053043122  | 3  | 321 |
| C21orf128    | 0.841705704 | 0.788688219 | 0.053017485  | 5  | 322 |
| HSPB1        | 0.635031731 | 0.557652289 | 0.077379441  | 12 | 323 |
| TRBJ2-6      | 0.920383865 | 0.817130117 | 0.103253748  | 1  | 324 |
| ILVBL        | 0.637408277 | 0.578628675 | 0.058779602  | 9  | 325 |
| HAS3         | 0.812603846 | 0.742136722 | 0.070467124  | 24 | 326 |
| DGAT1        | 0.56459272  | 0.497513611 | 0.067079109  | 6  | 327 |
| HAUS3        | 0.506127809 | 0.558906219 | -0.052778411 | 4  | 328 |
| BOK          | 0.780610094 | 0.727864334 | 0.05274576   | 12 | 329 |
| FAM72D       | 0.136009971 | 0.29192288  | -0.155912909 | 1  | 330 |
| FGF14-AS2    | 0.532427141 | 0.594040525 | -0.061613384 | 5  | 331 |
| C9orf96      | 0.59434705  | 0.538478857 | 0.055868193  | 6  | 332 |
| HIST1H2APS4  | 0.743194504 | 0.664638717 | 0.078555788  | 3  | 333 |
| FOXD4L5      | 0.716300569 | 0.638042846 | 0.078257723  | 1  | 334 |
| TREH         | 0.73545125  | 0.68281665  | 0.0526346    | 5  | 335 |
| GPR62        | 0.863190678 | 0.772985145 | 0.090205533  | 6  | 336 |
| C15orf62     | 0.799875905 | 0.721432791 | 0.078443115  | 3  | 337 |
| OR6C74       | 0.20178514  | 0.386853112 | -0.185067972 | 1  | 338 |
| C9orf135-AS1 | 0.932620149 | 0.833979104 | 0.098641045  | 3  | 339 |
| RPSAP58      | 0.397848286 | 0.298794814 | 0.099053472  | 3  | 340 |
| CD79B        | 0.852730712 | 0.762527354 | 0.090203358  | 7  | 341 |
| SMKR1        | 0.776560609 | 0.707878011 | 0.068682598  | 5  | 342 |
| KCNJ9        | 0.712400312 | 0.6378261   | 0.074574212  | 10 | 343 |
| HIST1H3F     | 0.903297779 | 0.805301293 | 0.097996486  | 4  | 344 |
| OR5T1        | 0.31749569  | 0.445008557 | -0.127512867 | 2  | 345 |
| RAB15        | 0.48288042  | 0.428651457 | 0.054228962  | 13 | 346 |

|            |             |             |              |    |     |
|------------|-------------|-------------|--------------|----|-----|
| PYCARD     | 0.879700021 | 0.776012159 | 0.103687863  | 15 | 347 |
| MIR140     | 0.935662406 | 0.835269031 | 0.100393375  | 1  | 348 |
| FOXD2-AS1  | 0.809381909 | 0.726745531 | 0.082636377  | 11 | 349 |
| IRX1       | 0.517234101 | 0.443070746 | 0.074163355  | 16 | 350 |
| LRRFIP1P1  | 0.750623508 | 0.679710092 | 0.070913415  | 7  | 351 |
| ADRB1      | 0.615152335 | 0.549501199 | 0.065651136  | 7  | 352 |
| UCP1       | 0.799716827 | 0.7042795   | 0.095437327  | 6  | 353 |
| KRTAP10-4  | 0.901376807 | 0.805137521 | 0.096239286  | 1  | 354 |
| HM13-AS1   | 0.523908725 | 0.472234947 | 0.051673777  | 4  | 355 |
| SDC4P      | 0.752530912 | 0.672164038 | 0.080366874  | 1  | 356 |
| RGS13      | 0.62205185  | 0.724602987 | -0.102551137 | 3  | 357 |
| TECTB      | 0.784213613 | 0.863033525 | -0.078819913 | 2  | 358 |
| LIME1      | 0.841163554 | 0.754532761 | 0.086630793  | 16 | 359 |
| TAC1       | 0.66697097  | 0.538571504 | 0.128399466  | 10 | 360 |
| TREX1      | 0.837401385 | 0.750988308 | 0.086413078  | 11 | 361 |
| UPK1A-AS1  | 0.743652397 | 0.657557856 | 0.08609454   | 2  | 362 |
| ZNF671     | 0.78458741  | 0.710644846 | 0.073942563  | 7  | 363 |
| KRTAP5-1   | 0.878291497 | 0.785468271 | 0.092823226  | 1  | 364 |
| FAM215A    | 0.908982632 | 0.813955911 | 0.095026721  | 2  | 365 |
| PCDH8P1    | 0.838308822 | 0.754942028 | 0.083366795  | 9  | 366 |
| WNT10A     | 0.637508212 | 0.586560298 | 0.050947915  | 31 | 367 |
| SUMO3      | 0.704100451 | 0.653171275 | 0.050929176  | 9  | 368 |
| LINC00525  | 0.488972232 | 0.319095233 | 0.169876999  | 1  | 369 |
| NPBWR1     | 0.696928058 | 0.590980763 | 0.105947295  | 15 | 370 |
| SLC25A22   | 0.670792538 | 0.620046996 | 0.050745542  | 22 | 371 |
| HIST1H1D   | 0.565889724 | 0.466023727 | 0.099865997  | 3  | 372 |
| LBX2-AS1   | 0.707384176 | 0.637926561 | 0.069457615  | 15 | 373 |
| EIF4EBP3   | 0.872065596 | 0.775871479 | 0.096194117  | 4  | 374 |
| MED18      | 0.457862737 | 0.406828324 | 0.051034413  | 6  | 375 |
| HOXD1      | 0.605843495 | 0.52187135  | 0.083972145  | 8  | 376 |
| OR2T10     | 0.399448631 | 0.523498865 | -0.124050234 | 1  | 377 |
| SNORD116-9 | 0.715447506 | 0.798754223 | -0.083306718 | 1  | 378 |
| SLITRK5    | 0.605128756 | 0.54192073  | 0.063208026  | 20 | 379 |
| LRRC32     | 0.796240626 | 0.720905358 | 0.075335268  | 18 | 380 |
| SNAI3      | 0.751464174 | 0.701276482 | 0.050187693  | 11 | 381 |
| LINC00923  | 0.904890751 | 0.79145062  | 0.11344013   | 2  | 382 |
| FBXO6      | 0.664264839 | 0.605603362 | 0.058661477  | 10 | 383 |
| TRIM48     | 0.740102925 | 0.82570408  | -0.085601155 | 1  | 384 |
| C11orf68   | 0.606586822 | 0.556550601 | 0.05003622   | 12 | 385 |
| ZC3H12A    | 0.716023845 | 0.656065808 | 0.059958037  | 12 | 386 |
| LINC00619  | 0.904387083 | 0.810945988 | 0.093441094  | 1  | 387 |
| C21orf90   | 0.88617411  | 0.802100177 | 0.084073933  | 2  | 388 |
| SPIN3      | 0.505241614 | 0.55502979  | -0.049788176 | 5  | 389 |
| DMRTC1     | 0.803454904 | 0.720560478 | 0.082894426  | 1  | 390 |
| GSTTP2     | 0.78373972  | 0.85545354  | -0.07171382  | 2  | 391 |
| PARD3-AS1  | 0.404066763 | 0.345858801 | 0.058207962  | 3  | 392 |
| NEUROD2    | 0.544077883 | 0.482432267 | 0.061645616  | 29 | 393 |
| TMEM141    | 0.490766113 | 0.441190215 | 0.049575898  | 10 | 394 |
| LHX3       | 0.795282059 | 0.723911431 | 0.071370628  | 25 | 395 |
| FABP5      | 0.485141572 | 0.39876787  | 0.086373702  | 13 | 396 |

|           |             |             |              |    |     |
|-----------|-------------|-------------|--------------|----|-----|
| IRX4      | 0.731656027 | 0.65784357  | 0.073812457  | 38 | 397 |
| FTMT      | 0.648292586 | 0.742618934 | -0.094326347 | 2  | 398 |
| ITGA5     | 0.456449233 | 0.403491794 | 0.052957439  | 12 | 399 |
| SLC51B    | 0.788954721 | 0.718006798 | 0.070947923  | 11 | 400 |
| LINC00654 | 0.826407487 | 0.742159604 | 0.084247883  | 2  | 401 |
| HIST1H2BE | 0.798998789 | 0.717121767 | 0.081877022  | 3  | 402 |
| MIR3655   | 0.080864982 | 0.130177454 | -0.049312472 | 1  | 403 |
| HIST1H2AI | 0.336602573 | 0.28730451  | 0.049298063  | 4  | 404 |
| SIGLEC8   | 0.419533631 | 0.527815909 | -0.108282279 | 3  | 405 |
| SLC16A13  | 0.752992577 | 0.686103243 | 0.066889334  | 4  | 406 |
| ZBTB26    | 0.70974088  | 0.66050329  | 0.04923759   | 3  | 407 |
| PLIN4     | 0.930197839 | 0.842516677 | 0.087681162  | 3  | 408 |
| KREMEN1   | 0.790489862 | 0.723268209 | 0.067221653  | 8  | 409 |
| PROM1     | 0.77523251  | 0.710946563 | 0.064285947  | 33 | 410 |
| SNAP29    | 0.487565882 | 0.43736957  | 0.050196312  | 7  | 411 |
| RPP25     | 0.600809293 | 0.540012287 | 0.060797006  | 7  | 412 |
| LTB       | 0.623069396 | 0.561895381 | 0.061174015  | 30 | 413 |
| BARHL1    | 0.882998355 | 0.79303056  | 0.089967795  | 14 | 414 |
| MIR663A   | 0.717735249 | 0.659091092 | 0.058644157  | 16 | 415 |
| SSMEM1    | 0.677739834 | 0.75705203  | -0.079312196 | 3  | 416 |
| CYTH4     | 0.733362069 | 0.660181869 | 0.0731802    | 9  | 417 |
| WWC2-AS2  | 0.602816181 | 0.544021605 | 0.058794576  | 6  | 418 |
| CLUHP4    | 0.479078469 | 0.661712548 | -0.182634079 | 1  | 419 |
| TMC6      | 0.7155544   | 0.658502781 | 0.057051619  | 27 | 420 |
| MATK      | 0.513110656 | 0.456147633 | 0.056963024  | 21 | 421 |
| CCL8      | 0.837127409 | 0.76093496  | 0.07619245   | 2  | 422 |
| TMSB4X    | 0.141991768 | 0.250225784 | -0.108234016 | 3  | 423 |
| SELL      | 0.734439438 | 0.645267923 | 0.089171515  | 4  | 424 |
| RNA5SP155 | 0.913354374 | 0.821046744 | 0.09230763   | 1  | 425 |
| TMEM72    | 0.581708567 | 0.508192497 | 0.07351607   | 5  | 426 |
| MIR142    | 0.868530545 | 0.784030211 | 0.084500334  | 8  | 427 |
| MAP7D2    | 0.72137886  | 0.659951208 | 0.061427653  | 12 | 428 |
| MAT1A     | 0.686557235 | 0.735100934 | -0.048543698 | 4  | 429 |
| STK24-AS1 | 0.526609392 | 0.478105243 | 0.04850415   | 4  | 430 |
| MEIS1-AS1 | 0.862430269 | 0.74242495  | 0.12000532   | 12 | 431 |
| XIAP      | 0.522142802 | 0.47337135  | 0.048771452  | 16 | 432 |
| CNTNAP3B  | 0.849353078 | 0.771308517 | 0.078044561  | 3  | 433 |
| OR1Q1     | 0.553836733 | 0.639890806 | -0.086054073 | 2  | 434 |
| RIPK3     | 0.875245906 | 0.788908158 | 0.086337748  | 9  | 435 |
| EN1       | 0.741182948 | 0.647779402 | 0.093403547  | 30 | 436 |
| POU3F1    | 0.643249208 | 0.584638402 | 0.058610806  | 12 | 437 |
| ZNF619    | 0.557771623 | 0.471097224 | 0.086674399  | 8  | 438 |
| SPATA41   | 0.840848018 | 0.763250883 | 0.077597134  | 8  | 439 |
| DFNB59    | 0.55675962  | 0.461587964 | 0.095171656  | 5  | 440 |
| NTF4      | 0.656133089 | 0.597030122 | 0.059102966  | 17 | 441 |
| BHLHE22   | 0.375102531 | 0.282629845 | 0.092472686  | 7  | 442 |
| TNFSF12   | 0.665920667 | 0.595216667 | 0.070704     | 20 | 443 |
| VMO1      | 0.879603885 | 0.79247634  | 0.087127545  | 7  | 444 |
| HIST1H3H  | 0.778304841 | 0.701454236 | 0.076850605  | 3  | 445 |
| THBD      | 0.680306863 | 0.615545875 | 0.064760988  | 10 | 446 |

|           |             |             |              |    |     |
|-----------|-------------|-------------|--------------|----|-----|
| CTSZ      | 0.777727591 | 0.71110444  | 0.066623151  | 10 | 447 |
| LINC00939 | 0.096799059 | 0.289771453 | -0.192972394 | 1  | 448 |
| PPM1M     | 0.780321632 | 0.714571818 | 0.065749814  | 10 | 449 |
| PRB4      | 0.368875312 | 0.467936763 | -0.099061451 | 2  | 450 |
| LBX2      | 0.825701387 | 0.745640491 | 0.080060896  | 22 | 451 |
| CD86      | 0.860821191 | 0.791264398 | 0.069556792  | 12 | 452 |
| HIST1H2BK | 0.764721157 | 0.700596799 | 0.064124358  | 16 | 453 |
| HCG9P5    | 0.314802917 | 0.267222436 | 0.047580482  | 5  | 454 |
| DEXI      | 0.563333292 | 0.515780304 | 0.047552988  | 7  | 455 |
| ATP6V0CP3 | 0.776110908 | 0.704191049 | 0.071919859  | 3  | 456 |
| FBLN1     | 0.676877776 | 0.629389296 | 0.04748848   | 12 | 457 |
| TMPRSS13  | 0.729871399 | 0.777329571 | -0.047458172 | 6  | 458 |
| SPATA2P1  | 0.31827068  | 0.422796377 | -0.104525697 | 1  | 459 |
| ZNF415    | 0.638795263 | 0.577300469 | 0.061494794  | 10 | 460 |
| RAMP2-AS1 | 0.805274248 | 0.736137762 | 0.069136486  | 6  | 461 |
| EMX1      | 0.756338389 | 0.681139842 | 0.075198547  | 29 | 462 |
| KIAA1324  | 0.775205627 | 0.705480844 | 0.069724783  | 15 | 463 |
| NKAIN1P1  | 0.818857013 | 0.738085605 | 0.080771407  | 2  | 464 |
| APOL1     | 0.715500791 | 0.649329902 | 0.066170889  | 5  | 465 |
| RBP7      | 0.630382445 | 0.567109569 | 0.063272875  | 8  | 466 |
| RMND1     | 0.603263123 | 0.556075101 | 0.047188022  | 7  | 467 |
| FAM195B   | 0.484104734 | 0.436830343 | 0.047274392  | 6  | 468 |
| LAT       | 0.857455813 | 0.775053575 | 0.082402238  | 9  | 469 |
| BPESC1    | 0.707125645 | 0.647992988 | 0.059132656  | 3  | 470 |
| DEFB118   | 0.464512851 | 0.412505863 | 0.052006987  | 2  | 471 |
| TSPY15P   | 0.469421164 | 0.520588662 | -0.051167498 | 1  | 472 |
| CHD1L     | 0.433125177 | 0.386282179 | 0.046842997  | 13 | 473 |
| FAM71E2   | 0.693958142 | 0.647121538 | 0.046836603  | 20 | 474 |
| KRT27     | 0.787284657 | 0.731451227 | 0.05583343   | 8  | 475 |
| CSF1      | 0.503268515 | 0.456449265 | 0.04681925   | 12 | 476 |
| HOXD4     | 0.912110563 | 0.824143147 | 0.087967416  | 13 | 477 |
| PAPPA-AS2 | 0.257504549 | 0.329156147 | -0.071651598 | 1  | 478 |
| ANXA2R    | 0.206410829 | 0.159742593 | 0.046668236  | 23 | 479 |
| OR2M3     | 0.272163805 | 0.424095015 | -0.15193121  | 3  | 480 |
| RAB21     | 0.356090576 | 0.309615707 | 0.046474869  | 8  | 481 |
| CLDN3     | 0.787974227 | 0.712706908 | 0.07526732   | 4  | 482 |
| CD52      | 0.870731184 | 0.787498054 | 0.083233129  | 7  | 483 |
| TNFSF13   | 0.561670526 | 0.472098024 | 0.089572502  | 6  | 484 |
| ZNF727    | 0.162167593 | 0.255780779 | -0.093613186 | 4  | 485 |
| CCNO      | 0.503261795 | 0.424650652 | 0.078611144  | 13 | 486 |
| RNASEH1P2 | 0.920813517 | 0.834705999 | 0.086107518  | 2  | 487 |
| PRKACG    | 0.557333229 | 0.603564953 | -0.046231724 | 2  | 488 |
| SLC22A17  | 0.68610379  | 0.63988256  | 0.04622123   | 16 | 489 |
| AGPAT2    | 0.723265354 | 0.666486674 | 0.056778681  | 9  | 490 |
| IL2RB     | 0.796930192 | 0.727335483 | 0.069594709  | 9  | 491 |
| CFC1B     | 0.866649932 | 0.78304327  | 0.083606662  | 1  | 492 |
| IZUMO1    | 0.783170874 | 0.737008147 | 0.046162728  | 7  | 493 |
| DNAJC17   | 0.692444517 | 0.644076764 | 0.048367753  | 22 | 494 |
| APOA1     | 0.748785623 | 0.696081791 | 0.052703832  | 9  | 495 |
| PCDHGC5   | 0.829638821 | 0.755089907 | 0.074548914  | 14 | 496 |

|           |             |             |             |    |     |
|-----------|-------------|-------------|-------------|----|-----|
| SLC7A5P1  | 0.455811522 | 0.409747901 | 0.046063621 | 2  | 497 |
| PRLHR     | 0.787330389 | 0.710862515 | 0.076467874 | 8  | 498 |
| ANKRD26P3 | 0.802559195 | 0.746337174 | 0.056222021 | 4  | 499 |
| FGF17     | 0.839561462 | 0.76234902  | 0.077212441 | 11 | 500 |

**Supplementary Table S12. List of the 500 top-ranked, differentially methylated CGIs after *TET* triple knockdown.**

For CGIs overlapping with 2 kb promoter regions, corresponding promoter gene symbols are provided.

| CGI                       | promoter_overlap | beta.GFP_siRNA | beta.GFP_scramble | difference   | num.sites | rank |
|---------------------------|------------------|----------------|-------------------|--------------|-----------|------|
| chr7:138666359-138666972  | KIAA1549         | 0.489669095    | 0.265051096       | 0.224618     | 2         | 1    |
| chr1:149605515-149605903  | RNVU1-20         | 0.361994384    | 0.160476523       | 0.201517861  | 1         | 2    |
| chr4:3464800-3465440      | DOK7             | 0.530252206    | 0.357766806       | 0.172485399  | 8         | 3    |
| chr9:103791945-103792173  |                  | 0.592916636    | 0.346410793       | 0.246505843  | 2         | 4    |
| chr3:46933747-46934293    |                  | 0.766497096    | 0.511601366       | 0.25489573   | 5         | 5    |
| chr9:34377402-34377610    | KIAA1161         | 0.436128902    | 0.274696406       | 0.161432495  | 2         | 6    |
| chr17:54674874-54675232   |                  | 0.400776177    | 0.263999798       | 0.136776378  | 4         | 7    |
| chr14:26674164-26674478   |                  | 0.673964325    | 0.541186619       | 0.132777705  | 4         | 8    |
| chr12:47224913-47225664   |                  | 0.692618476    | 0.471692535       | 0.220925941  | 4         | 9    |
| chr3:46887629-46887919    |                  | 0.710075536    | 0.476483867       | 0.23359167   | 2         | 10   |
| chr12:108168987-108169570 |                  | 0.622011859    | 0.44593321        | 0.176078649  | 4         | 11   |
| chr4:155547985-155548322  | LRAT             | 0.418931194    | 0.239848867       | 0.179082327  | 5         | 12   |
| chr1:15573621-15573953    | FHAD1            | 0.389119751    | 0.239083461       | 0.15003629   | 4         | 13   |
| chr8:117950473-117950717  | AARD             | 0.509981124    | 0.321085221       | 0.188895903  | 2         | 14   |
| chr16:66460504-66460850   | BEAN1            | 0.400427933    | 0.254246521       | 0.146181412  | 2         | 15   |
| chr12:131199825-131200157 |                  | 0.578978284    | 0.427105293       | 0.151872991  | 3         | 16   |
| chr11:1592499-1592810     | KRTAP5-AS1;DUSP8 | 0.596487917    | 0.415102353       | 0.181385564  | 2         | 17   |
| chr19:42501262-42501486   | ATP1A3           | 0.244210877    | 0.109212808       | 0.134998069  | 2         | 18   |
| chr13:28540357-28541279   |                  | 0.717871695    | 0.510745901       | 0.207125793  | 2         | 19   |
| chr19:45947711-45948047   |                  | 0.695483123    | 0.538320425       | 0.157162697  | 3         | 20   |
| chr6:19691911-19692305    |                  | 0.820811335    | 0.597481627       | 0.223329708  | 4         | 21   |
| chr18:47087880-47088528   |                  | 0.289102376    | 0.162691444       | 0.126410932  | 9         | 22   |
| chr2:75787130-75787420    |                  | 0.597771015    | 0.407713056       | 0.190057959  | 3         | 23   |
| chr5:50685454-50686148    |                  | 0.778374275    | 0.568692374       | 0.209681901  | 4         | 24   |
| chr10:72218131-72218484   |                  | 0.332018859    | 0.201900988       | 0.130117871  | 2         | 25   |
| chr12:54811982-54812202   |                  | 0.665139504    | 0.472591149       | 0.192548355  | 2         | 26   |
| chr9:72026904-72027428    |                  | 0.916460393    | 0.654077341       | 0.262383052  | 1         | 27   |
| chr19:1523706-1524565     | PLK5             | 0.496793725    | 0.352935032       | 0.143858693  | 4         | 28   |
| chr3:72788073-72788416    |                  | 0.482021201    | 0.242749969       | 0.239271232  | 3         | 29   |
| chr2:220173871-220174283  | PTPRN            | 0.594928427    | 0.434395655       | 0.160532771  | 4         | 30   |
| chr7:128577819-128578756  | IRF5             | 0.397240703    | 0.28041728        | 0.116823423  | 12        | 31   |
| chr5:134824932-134825224  |                  | 0.427599045    | 0.305573907       | 0.122025138  | 1         | 32   |
| chr9:46861917-46862270    |                  | 0.712962808    | 0.515882238       | 0.19708057   | 1         | 33   |
| chr3:158519510-158520329  |                  | 0.280878515    | 0.136227907       | 0.144650608  | 9         | 34   |
| chr7:32110064-32110910    |                  | 0.361857837    | 0.243268098       | 0.118589739  | 5         | 35   |
| chr17:33775295-33775794   | SLFN13           | 0.571281868    | 0.444332884       | 0.126948983  | 5         | 36   |
| chr14:76597649-76597911   |                  | 0.621806102    | 0.465522943       | 0.156283158  | 2         | 37   |
| chr9:44419920-44420345    |                  | 0.657299331    | 0.481366016       | 0.175933315  | 1         | 38   |
| chr17:34091137-34091919   |                  | 0.330429591    | 0.217511091       | 0.1129185    | 3         | 39   |
| chr11:47615711-47616055   | C1QTNF4          | 0.426409157    | 0.169088109       | 0.257321048  | 1         | 40   |
| chr11:64781451-64782385   | ARL2;SNX15       | 0.225415587    | 0.113467779       | 0.111947808  | 4         | 41   |
| chr11:18067717-18067928   |                  | 0.797203056    | 0.615710838       | 0.181492218  | 2         | 42   |
| chr5:41869664-41870876    | OXCT1-AS1;OXCT1  | 0.401641729    | 0.249222756       | 0.152418972  | 10        | 43   |
| chr20:34652455-34653500   |                  | 0.465441932    | 0.350387702       | 0.11505423   | 4         | 44   |
| chr2:170220773-170221114  |                  | 0.306156333    | 0.187032545       | 0.119123788  | 4         | 45   |
| chr1:243264941-243265196  |                  | 0.530066324    | 0.394819713       | 0.135246611  | 1         | 46   |
| chr8:91013142-91014266    | DECR1            | 0.833483767    | 0.62893995        | 0.204543817  | 10        | 47   |
| chr20:56323974-56324254   |                  | 0.499555128    | 0.355562791       | 0.143992337  | 3         | 48   |
| chr14:36977519-36977996   |                  | 0.505561781    | 0.373965057       | 0.131596724  | 4         | 49   |
| chr12:49485767-49485977   |                  | 0.560793552    | 0.451501029       | 0.109292524  | 3         | 50   |
| chr13:92051154-92051716   | GPC5             | 0.476273763    | 0.354907247       | 0.121366516  | 4         | 51   |
| chr6:58180155-58180443    |                  | 0.681169373    | 0.513933503       | 0.167235871  | 1         | 52   |
| chr12:56325775-56326223   | WIBG             | 0.418962423    | 0.288705036       | 0.130257387  | 6         | 53   |
| chr2:79220193-79220592    |                  | 0.550802352    | 0.418936717       | 0.131865635  | 4         | 54   |
| chr5:74907287-74907770    | ANKDD1B          | 0.840941225    | 0.656041974       | 0.184899251  | 3         | 55   |
| chr19:2540907-2541138     |                  | 0.5780065      | 0.75146714        | -0.173460639 | 3         | 56   |
| chr9:88137610-88137985    |                  | 0.737524932    | 0.56708562        | 0.170439313  | 2         | 57   |
| chr1:91182510-91182857    | BARHL2           | 0.506551433    | 0.399163332       | 0.107388101  | 5         | 58   |
| chr9:77112713-77113583    | RORB             | 0.41301017     | 0.276933826       | 0.136076345  | 2         | 59   |
| chr8:144653775-144653976  |                  | 0.229902421    | 0.123366068       | 0.106536353  | 4         | 60   |
| chr3:133747921-133748266  |                  | 0.750369212    | 0.571494494       | 0.178874718  | 2         | 61   |
| chr11:30038523-30038823   | KCNA4            | 0.453007891    | 0.28065993        | 0.172347961  | 9         | 62   |
| chr11:68611251-68611807   | CPT1A            | 0.760582441    | 0.600699271       | 0.15988317   | 5         | 63   |
| chr1:209979317-209979666  | IRF6             | 0.518263729    | 0.333455662       | 0.184808067  | 8         | 64   |
| chr6:84562821-84563758    | RIPPLY2          | 0.40420047     | 0.292196265       | 0.112004205  | 10        | 65   |
| chr17:46690391-46691055   |                  | 0.546559564    | 0.421851856       | 0.124707708  | 2         | 66   |
| chr6:50692150-50692375    |                  | 0.441849267    | 0.274005194       | 0.167844073  | 3         | 67   |
| chr15:60690709-60690930   |                  | 0.664864397    | 0.517122611       | 0.147741785  | 2         | 68   |
| chr5:50694985-50695352    |                  | 0.750439709    | 0.582932993       | 0.167506716  | 3         | 69   |
| chr9:29826527-29826736    |                  | 0.590302493    | 0.721791151       | -0.131488658 | 2         | 70   |



|                           |              |             |             |              |    |     |
|---------------------------|--------------|-------------|-------------|--------------|----|-----|
| chr5:115912002-115912384  | SEMA6A       | 0.680177506 | 0.562107212 | 0.118070294  | 4  | 71  |
| chr2:31360322-31361821    |              | 0.415570428 | 0.311671655 | 0.103898773  | 12 | 72  |
| chr17:16487651-16487884   |              | 0.77222646  | 0.611450432 | 0.160776029  | 3  | 73  |
| chr9:35111268-35111504    |              | 0.264165589 | 0.146842162 | 0.117323427  | 1  | 74  |
| chr10:104629039-104629479 | AS3MT        | 0.458523508 | 0.297522996 | 0.161000512  | 7  | 75  |
| chr16:30042308-30042612   |              | 0.720306738 | 0.567982868 | 0.15232387   | 3  | 76  |
| chrX:3630407-3630620      |              | 0.755988997 | 0.571469357 | 0.18451964   | 4  | 77  |
| chr16:67188614-67189652   |              | 0.702827956 | 0.600111036 | 0.10271692   | 3  | 78  |
| chr8:49293202-49293547    |              | 0.605436362 | 0.483534486 | 0.121901876  | 3  | 79  |
| chr6:29521111-29521833    | OR2I1P       | 0.625419509 | 0.491876913 | 0.133542596  | 32 | 80  |
| chr9:115708029-115708238  |              | 0.678785934 | 0.533593633 | 0.1451923    | 1  | 81  |
| chr1:39044060-39044561    |              | 0.294757431 | 0.163667907 | 0.131089524  | 5  | 82  |
| chr1:217311468-217311773  | ESRRG        | 0.712178438 | 0.564405623 | 0.147772814  | 4  | 83  |
| chr20:44440947-44441655   | UBE2C        | 0.535132739 | 0.426932684 | 0.108200054  | 16 | 84  |
| chr1:209848444-209849428  | GOS2         | 0.498941568 | 0.354511499 | 0.144430069  | 8  | 85  |
| chr12:113592204-113592620 |              | 0.866212447 | 0.687594219 | 0.178618228  | 4  | 86  |
| chr7:948295-949168        |              | 0.447678732 | 0.321163469 | 0.126515264  | 2  | 87  |
| chr11:8009048-8009251     |              | 0.372745771 | 0.271435333 | 0.101310438  | 2  | 88  |
| chr8:10586614-10586886    |              | 0.815336007 | 0.648103403 | 0.167232604  | 4  | 89  |
| chr20:57797224-57797441   |              | 0.511784085 | 0.410488077 | 0.101296009  | 2  | 90  |
| chr8:33456916-33457515    | DUSP26       | 0.559122479 | 0.440413866 | 0.118708613  | 6  | 91  |
| chr9:32572997-32573227    | NDUFB6       | 0.208203095 | 0.082953234 | 0.125249861  | 1  | 92  |
| chr16:34407637-34407919   | SLC25A1P4    | 0.563682063 | 0.67108939  | -0.107407326 | 4  | 93  |
| chr4:991239-991625        |              | 0.74757208  | 0.600427626 | 0.147144454  | 2  | 94  |
| chr19:23257958-23258518   | ZNF730       | 0.391885958 | 0.276817162 | 0.115068796  | 3  | 95  |
| chr16:74734153-74734572   | MLKL         | 0.643962714 | 0.51662921  | 0.127333505  | 4  | 96  |
| chr3:22413493-22414365    | ZNF385D      | 0.491406272 | 0.377251436 | 0.114154837  | 6  | 97  |
| chr5:33892192-33892403    | ADAMTS12     | 0.616054546 | 0.491010439 | 0.125044107  | 1  | 98  |
| chr9:33044246-33044612    |              | 0.67624309  | 0.539364841 | 0.136878248  | 1  | 99  |
| chr18:61603401-61604244   |              | 0.410038574 | 0.29214163  | 0.117896944  | 5  | 100 |
| chr10:133849677-133850826 |              | 0.595048922 | 0.493504506 | 0.101544417  | 7  | 101 |
| chr1:21948675-21949263    |              | 0.535700428 | 0.43190539  | 0.103795038  | 3  | 102 |
| chr10:130339527-130339777 |              | 0.791894202 | 0.64068077  | 0.151213432  | 5  | 103 |
| chr9:129677707-129678009  |              | 0.255044604 | 0.151094746 | 0.103949858  | 2  | 104 |
| chr17:38935800-38936093   |              | 0.669273019 | 0.556766742 | 0.112506277  | 4  | 105 |
| chr19:9903582-9903990     | ZNF846       | 0.759669543 | 0.612808028 | 0.146861515  | 3  | 106 |
| chr16:31453944-31454561   | ZNF843       | 0.356568308 | 0.258135393 | 0.098432915  | 3  | 107 |
| chr4:570951-571768        |              | 0.705690355 | 0.567089174 | 0.138601181  | 7  | 108 |
| chr4:10462833-10463689    |              | 0.722237393 | 0.573611067 | 0.148626326  | 6  | 109 |
| chr1:11724114-11724885    | FBXO6        | 0.568480374 | 0.462571519 | 0.105908855  | 7  | 110 |
| chr7:123172733-123173231  |              | 0.231416491 | 0.133844979 | 0.097571511  | 1  | 111 |
| chr16:75033042-75034207   | ZNRF1;WDR59  | 0.313722565 | 0.216235514 | 0.09748705   | 5  | 112 |
| chr6:33181011-33181256    |              | 0.594446013 | 0.478536327 | 0.115909687  | 7  | 113 |
| chr1:91172103-91172771    |              | 0.595957755 | 0.478856486 | 0.117101269  | 5  | 114 |
| chr16:3493099-3493569     | NAA60;ZNF597 | 0.596386274 | 0.477308666 | 0.119077608  | 6  | 115 |
| chr6:26689804-26690092    |              | 0.699054913 | 0.563660255 | 0.135394658  | 2  | 116 |
| chr1:98510967-98511710    |              | 0.287977907 | 0.18388667  | 0.104091238  | 6  | 117 |
| chrX:9863528-9863822      |              | 0.786832652 | 0.895718137 | -0.108885485 | 4  | 118 |
| chr19:18220765-18221445   |              | 0.41346649  | 0.304727865 | 0.108738625  | 3  | 119 |
| chr1:10057122-10058108    | RBP7         | 0.602307166 | 0.49394722  | 0.108359946  | 8  | 120 |
| chr1:20692583-20693534    |              | 0.647503555 | 0.517964114 | 0.129539441  | 5  | 121 |
| chr16:68678687-68680149   |              | 0.739232515 | 0.600230374 | 0.139002141  | 5  | 122 |
| chr10:94831513-94832312   | CYP26A1      | 0.739326087 | 0.5994298   | 0.139896287  | 3  | 123 |
| chr6:170190112-170190712  | LINC00574    | 0.327439316 | 0.209118703 | 0.118320613  | 6  | 124 |
| chr9:130980901-130981317  |              | 0.608560306 | 0.48808132  | 0.120478986  | 2  | 125 |
| chr7:1084388-1084595      | GPR146       | 0.294098849 | 0.172702686 | 0.121396163  | 2  | 126 |
| chr14:100259161-100259542 |              | 0.88963529  | 0.724201779 | 0.165433512  | 4  | 127 |
| chr16:88449290-88450382   |              | 0.59311526  | 0.482626526 | 0.110488734  | 5  | 128 |
| chr2:5813483-5813710      |              | 0.634094976 | 0.513003776 | 0.121091201  | 2  | 129 |
| chr9:138606404-138606934  |              | 0.535490573 | 0.402762551 | 0.132728022  | 2  | 130 |
| chr13:21900426-21900637   |              | 0.85937044  | 0.700211919 | 0.159158521  | 3  | 131 |
| chr12:113914441-113914657 |              | 0.812385904 | 0.631939178 | 0.180446726  | 3  | 132 |
| chr17:46673533-46674181   |              | 0.615240833 | 0.498395439 | 0.116845394  | 3  | 133 |
| chr7:121943868-121944538  | FEZF1-AS1    | 0.357081876 | 0.25918423  | 0.097897645  | 5  | 134 |
| chr19:59010485-59011011   |              | 0.541704055 | 0.440876437 | 0.100827618  | 4  | 135 |
| chr7:5526390-5526693      |              | 0.770608369 | 0.624668705 | 0.145939664  | 1  | 136 |
| chr5:43000344-43000791    |              | 0.820775416 | 0.667799179 | 0.152976237  | 4  | 137 |
| chr8:97657175-97657943    | CPQ          | 0.352082693 | 0.213228514 | 0.138854179  | 12 | 138 |
| chr8:50822271-50822860    | SNTG1        | 0.870178682 | 0.708070855 | 0.162107827  | 4  | 139 |
| chr15:41952536-41953222   |              | 0.563272821 | 0.458468521 | 0.1048043    | 3  | 140 |
| chr19:53360202-53360460   | ZNF28;ZNF468 | 0.520075242 | 0.421327604 | 0.098747638  | 1  | 141 |
| chr11:63438302-63439314   | ATL3         | 0.724720946 | 0.589658898 | 0.135062048  | 13 | 142 |
| chr14:25518425-25519612   | STXBP6       | 0.435493018 | 0.332694574 | 0.102798444  | 3  | 143 |

|                           |               |             |             |              |    |     |
|---------------------------|---------------|-------------|-------------|--------------|----|-----|
| chr5:157098264-157099041  | C5orf52;SOX30 | 0.463018565 | 0.322368132 | 0.140650433  | 8  | 144 |
| chr19:58545116-58545897   | ZSCAN1        | 0.808435379 | 0.680400552 | 0.128034827  | 10 | 145 |
| chr1:54965024-54965391    |               | 0.365940134 | 0.271343909 | 0.094596225  | 3  | 146 |
| chr19:16528759-16529029   |               | 0.71841881  | 0.61926961  | 0.0991492    | 3  | 147 |
| chr5:75377899-75378189    | SV2C          | 0.603093855 | 0.498943581 | 0.104150274  | 4  | 148 |
| chr6:26197071-26197537    |               | 0.525680597 | 0.422325927 | 0.103354669  | 4  | 149 |
| chr17:33814235-33814947   |               | 0.767358499 | 0.616700369 | 0.150658131  | 6  | 150 |
| chr2:176950596-176950846  |               | 0.720838088 | 0.59743971  | 0.123398378  | 3  | 151 |
| chr16:81437205-81437542   |               | 0.107874852 | 0.226857671 | -0.118982819 | 2  | 152 |
| chr5:50265086-50265737    |               | 0.759965475 | 0.618424929 | 0.141540546  | 4  | 153 |
| chr13:31019861-31020137   |               | 0.42661866  | 0.319447776 | 0.107170884  | 2  | 154 |
| chr7:41745179-41745462    |               | 0.658434618 | 0.537794362 | 0.120640256  | 3  | 155 |
| chr16:1463763-1464716     | UNKL          | 0.389296499 | 0.289329284 | 0.099967214  | 3  | 156 |
| chr2:26396103-26397204    | GAREML        | 0.631144573 | 0.532084978 | 0.099059595  | 4  | 157 |
| chr16:49309124-49309353   |               | 0.82186964  | 0.674286275 | 0.147583365  | 2  | 158 |
| chr19:54024646-54024923   | ZNF331        | 0.494821696 | 0.401369479 | 0.093452217  | 4  | 159 |
| chr2:228582486-228582821  | SLC19A3       | 0.671148433 | 0.557058388 | 0.114090045  | 8  | 160 |
| chr21:42218490-42219222   | DSCAM         | 0.603897287 | 0.496812783 | 0.107084503  | 8  | 161 |
| chr15:45480702-45480922   |               | 0.623432965 | 0.517804165 | 0.1056288    | 2  | 162 |
| chr4:155254131-155254603  |               | 0.896700984 | 0.740879097 | 0.155821887  | 4  | 163 |
| chr20:34204988-34205269   |               | 0.608412736 | 0.50469054  | 0.103722196  | 4  | 164 |
| chr5:139076543-139077179  |               | 0.324271483 | 0.20930927  | 0.114962213  | 5  | 165 |
| chr9:129088647-129088994  | MVB12B        | 0.740173982 | 0.606853911 | 0.133320071  | 1  | 166 |
| chr19:1795923-1797001     |               | 0.715819516 | 0.622809563 | 0.093009952  | 4  | 167 |
| chr14:103557607-103558235 |               | 0.446431761 | 0.353618747 | 0.092813014  | 4  | 168 |
| chr1:87797369-87797884    |               | 0.394097579 | 0.301304483 | 0.092793096  | 4  | 169 |
| chr18:43355319-43355698   |               | 0.67559331  | 0.553595178 | 0.121998132  | 3  | 170 |
| chr19:3671903-3672121     |               | 0.675925895 | 0.554009791 | 0.121916104  | 2  | 171 |
| chr12:54387826-54388732   | HOXC9         | 0.697779773 | 0.571604935 | 0.126174838  | 5  | 172 |
| chr12:54408427-54408713   |               | 0.866775081 | 0.713599725 | 0.153175356  | 2  | 173 |
| chr5:50683286-50683615    |               | 0.779110346 | 0.639402842 | 0.139707504  | 4  | 174 |
| chr8:142528186-142529029  |               | 0.638528481 | 0.517394148 | 0.121134333  | 3  | 175 |
| chr18:77724353-77724836   | HSBP1L1       | 0.414913268 | 0.3184867   | 0.096426568  | 5  | 176 |
| chrX:102884437-102884677  |               | 0.648342267 | 0.527310356 | 0.121031912  | 2  | 177 |
| chr2:200524002-200524204  | SEPHS1P6      | 0.578571329 | 0.482530214 | 0.096041115  | 3  | 178 |
| chr7:155325812-155326357  | CNPY1         | 0.695700311 | 0.57522122  | 0.120479091  | 4  | 179 |
| chr7:102920310-102921514  | DPY19L2P2     | 0.5546664   | 0.457804239 | 0.096862161  | 13 | 180 |
| chr17:1808573-1808773     |               | 0.830428585 | 0.68904125  | 0.141387335  | 3  | 181 |
| chr6:43276420-43276659    | CRIP3         | 0.574102563 | 0.472206634 | 0.101895929  | 6  | 182 |
| chr2:230135709-230136004  | PID1          | 0.305769338 | 0.205181721 | 0.100587617  | 4  | 183 |
| chr3:50275394-50275645    |               | 0.659729352 | 0.546299887 | 0.113429465  | 4  | 184 |
| chr5:80689819-80690228    | ACOT12        | 0.893815866 | 0.739881003 | 0.153934863  | 3  | 185 |
| chr10:100227439-100227832 |               | 0.691509679 | 0.577138324 | 0.114371355  | 3  | 186 |
| chr19:53496733-53497028   |               | 0.450618487 | 0.358048566 | 0.092569922  | 5  | 187 |
| chr22:19701515-19701891   | SEPT5         | 0.802531276 | 0.673868973 | 0.128662303  | 5  | 188 |
| chr10:94459255-94459591   |               | 0.30132538  | 0.186535068 | 0.114790312  | 4  | 189 |
| chr17:30263762-30264515   | SUZ12         | 0.159969879 | 0.064280853 | 0.095689027  | 6  | 190 |
| chr3:40518518-40518848    | ZNF619        | 0.266859094 | 0.119338042 | 0.147521052  | 5  | 191 |
| chr4:16084196-16085735    | PROM1         | 0.682786106 | 0.580925575 | 0.101860531  | 11 | 192 |
| chr11:123065427-123066184 | CLMP          | 0.743900502 | 0.620883381 | 0.123017121  | 4  | 193 |
| chr8:65492936-65494452    | BHLHE22       | 0.25135984  | 0.12539966  | 0.12596018   | 4  | 194 |
| chr22:43165948-43166287   |               | 0.672628067 | 0.523643649 | 0.148984417  | 2  | 195 |
| chr19:53696030-53696650   | ZNF665        | 0.831151852 | 0.696882685 | 0.134269167  | 6  | 196 |
| chr1:18436552-18437673    |               | 0.409019999 | 0.312861332 | 0.096158668  | 5  | 197 |
| chr16:29477390-29478502   |               | 0.72647444  | 0.602242695 | 0.124231745  | 1  | 198 |
| chr6:85482570-85484718    |               | 0.599866466 | 0.507395214 | 0.092471252  | 13 | 199 |
| chr17:7197432-7198417     | YBX2          | 0.7565119   | 0.648461782 | 0.108050117  | 12 | 200 |
| chr8:145637966-145639182  |               | 0.72266754  | 0.632324581 | 0.090342959  | 6  | 201 |
| chr16:31548738-31549184   |               | 0.851440454 | 0.714257507 | 0.137182947  | 3  | 202 |
| chr7:27227521-27229043    |               | 0.677965603 | 0.564281499 | 0.113684103  | 4  | 203 |
| chr20:58152281-58152847   | PHACTR3       | 0.83297969  | 0.698186991 | 0.134792698  | 3  | 204 |
| chr3:46607347-46607806    |               | 0.810864787 | 0.681186651 | 0.129678136  | 3  | 205 |
| chr1:161008378-161008830  | TSTD1         | 0.742973605 | 0.618707359 | 0.124266247  | 8  | 206 |
| chr18:73627918-73628658   |               | 0.758353059 | 0.619777202 | 0.138575857  | 3  | 207 |
| chr15:72476677-72476969   |               | 0.757897957 | 0.641050897 | 0.116847061  | 4  | 208 |
| chr12:54071054-54071265   | ATP5G2        | 0.482087843 | 0.39240749  | 0.089680352  | 5  | 209 |
| chr22:19156978-19157413   |               | 0.759057175 | 0.62493411  | 0.134123064  | 3  | 210 |
| chr10:112431836-112432426 |               | 0.361349464 | 0.180618597 | 0.180730867  | 7  | 211 |
| chr14:38678246-38680937   |               | 0.600438833 | 0.489484713 | 0.11095412   | 10 | 212 |
| chr22:43505952-43506167   | BIK           | 0.795747866 | 0.673332702 | 0.122415164  | 3  | 213 |
| chr22:21311337-21312201   |               | 0.789945792 | 0.662834291 | 0.127111501  | 4  | 214 |
| chr18:13801000-13801223   |               | 0.20607336  | 0.116829764 | 0.089243596  | 3  | 215 |
| chr17:37764093-37764304   |               | 0.589902036 | 0.496553091 | 0.093348946  | 7  | 216 |

|                           |                              |             |             |              |    |     |
|---------------------------|------------------------------|-------------|-------------|--------------|----|-----|
| chr9:135039674-135039978  |                              | 0.856813032 | 0.714853453 | 0.141959579  | 2  | 217 |
| chr6:26199198-26199466    | HIST1H2BF;HIST1H2AD;HIST1H3D | 0.632398494 | 0.526381703 | 0.106016791  | 2  | 218 |
| chr6:13873766-13874262    |                              | 0.577867869 | 0.486168552 | 0.091699317  | 4  | 219 |
| chr5:54528096-54528404    |                              | 0.73023903  | 0.620202114 | 0.110036916  | 4  | 220 |
| chr10:26504384-26507434   | GAD2                         | 0.641064887 | 0.549487525 | 0.091577362  | 18 | 221 |
| chr12:133195923-133196556 |                              | 0.734979371 | 0.627156013 | 0.107823359  | 3  | 222 |
| chr9:122131087-122132214  | DBC1                         | 0.730249007 | 0.617173783 | 0.113075223  | 6  | 223 |
| chr2:105760110-105761018  |                              | 0.470517848 | 0.367071299 | 0.103446549  | 4  | 224 |
| chr12:115130009-115130242 |                              | 0.815762358 | 0.683311299 | 0.132451059  | 1  | 225 |
| chr6:33396051-33396296    |                              | 0.713263052 | 0.600226913 | 0.113036139  | 9  | 226 |
| chr20:30135077-30135292   |                              | 0.723711675 | 0.607303077 | 0.116408598  | 7  | 227 |
| chr10:13933483-13934184   |                              | 0.502073707 | 0.414891198 | 0.087182509  | 3  | 228 |
| chr3:121902743-121903645  | CASR                         | 0.868594675 | 0.730333504 | 0.138261171  | 4  | 229 |
| chr17:7108305-7108654     |                              | 0.564830416 | 0.472010028 | 0.092820388  | 3  | 230 |
| chr5:141293785-141294049  |                              | 0.711986104 | 0.597917218 | 0.114068886  | 4  | 231 |
| chrX:13587649-13588221    | EGFL6                        | 0.850111391 | 0.718591851 | 0.131519539  | 4  | 232 |
| chr9:94903573-94903827    | LINC00475                    | 0.812218186 | 0.682836241 | 0.129381945  | 1  | 233 |
| chr20:1783825-1784552     |                              | 0.677506835 | 0.568781457 | 0.108725379  | 4  | 234 |
| chr3:184321784-184322277  |                              | 0.831934237 | 0.700421926 | 0.131512312  | 3  | 235 |
| chr10:91294948-91295925   |                              | 0.602080103 | 0.515305487 | 0.086774616  | 12 | 236 |
| chr2:26785115-26785687    | C2orf70                      | 0.772731363 | 0.649884828 | 0.122846535  | 10 | 237 |
| chr1:109656096-109656611  | KIAA1324;C1orf194            | 0.598168611 | 0.502215712 | 0.095952899  | 5  | 238 |
| chr11:32008803-32009044   |                              | 0.778347067 | 0.657838352 | 0.120508715  | 3  | 239 |
| chr9:123690772-123691675  | TRAF1                        | 0.646856748 | 0.559576445 | 0.087280303  | 3  | 240 |
| chr18:2905951-2907348     |                              | 0.808466657 | 0.690691766 | 0.11777489   | 6  | 241 |
| chr1:16543684-16544307    |                              | 0.460368833 | 0.374036708 | 0.086332125  | 5  | 242 |
| chr16:2907575-2907836     | PRSS22                       | 0.808822534 | 0.686379331 | 0.122443203  | 2  | 243 |
| chr8:72917306-72917641    |                              | 0.859179683 | 0.723777031 | 0.135402652  | 3  | 244 |
| chr9:138156711-138156983  |                              | 0.701888519 | 0.856081342 | -0.154192823 | 1  | 245 |
| chr9:141044509-141045113  | TUBBP5                       | 0.570007868 | 0.483770586 | 0.086237282  | 2  | 246 |
| chr10:135170646-135171954 | FUOM                         | 0.68795095  | 0.601823736 | 0.086127214  | 11 | 247 |
| chr22:50468455-50469353   |                              | 0.284404513 | 0.198418065 | 0.085986448  | 3  | 248 |
| chr12:57635241-57635572   | NDUFA4L2                     | 0.893732127 | 0.755384687 | 0.138347439  | 2  | 249 |
| chr19:36164078-36164286   | UPK1A-AS1                    | 0.901972441 | 0.760498322 | 0.14147412   | 1  | 250 |
| chr10:23487758-23488543   |                              | 0.566174402 | 0.480364143 | 0.085810258  | 4  | 251 |
| chr16:1120154-1120441     |                              | 0.179889619 | 0.265628765 | -0.085739146 | 1  | 252 |
| chr6:105388191-105389545  | LINC00577                    | 0.785625872 | 0.689926802 | 0.095699069  | 7  | 253 |
| chr13:88329395-88329885   |                              | 0.650826727 | 0.534953334 | 0.115873392  | 3  | 254 |
| chr14:21537083-21537355   | ARHGEF40                     | 0.696494324 | 0.587535691 | 0.108958633  | 1  | 255 |
| chr18:59992070-59993556   | TNFRSF11A                    | 0.368175131 | 0.282547636 | 0.085627495  | 9  | 256 |
| chr16:3355021-3356012     | ZNF75A;TIGD7                 | 0.712434003 | 0.604294825 | 0.108139178  | 7  | 257 |
| chr7:8301032-8302252      | ICA1                         | 0.357181513 | 0.266035559 | 0.091145954  | 10 | 258 |
| chr13:28363744-28364269   |                              | 0.878771563 | 0.743014469 | 0.135757094  | 3  | 259 |
| chr2:149645537-149645834  |                              | 0.613823281 | 0.516406449 | 0.097416832  | 3  | 260 |
| chr17:16310307-16310914   |                              | 0.58550408  | 0.500019018 | 0.085485062  | 3  | 261 |
| chr11:111385338-111385712 | C11orf88                     | 0.663155557 | 0.557890994 | 0.105264562  | 6  | 262 |
| chr16:68563760-68564281   | ZFP90                        | 0.552038523 | 0.466557098 | 0.085481425  | 6  | 263 |
| chr7:103086345-103086840  | SLC26A5                      | 0.478467674 | 0.393076885 | 0.085390789  | 5  | 264 |
| chr17:56326686-56327262   |                              | 0.694373566 | 0.600232032 | 0.094141534  | 3  | 265 |
| chr21:46351329-46352911   | ITGB2                        | 0.709169364 | 0.602545769 | 0.106623595  | 6  | 266 |
| chr2:219757459-219758001  |                              | 0.361278125 | 0.276112024 | 0.085166101  | 4  | 267 |
| chr20:4202149-4202765     |                              | 0.60962924  | 0.516537857 | 0.093091383  | 3  | 268 |
| chr5:134914179-134914981  | CXCL14                       | 0.838011577 | 0.711009932 | 0.127001645  | 4  | 269 |
| chr2:119599060-119599299  |                              | 0.879647177 | 0.733794304 | 0.145852873  | 1  | 270 |
| chr1:116710838-116711260  |                              | 0.739216925 | 0.626933376 | 0.11228355   | 3  | 271 |
| chr19:45954066-45954504   |                              | 0.402179384 | 0.297364642 | 0.104814742  | 2  | 272 |
| chr2:97173852-97174485    | NEURL3                       | 0.737333559 | 0.630403236 | 0.106932354  | 10 | 273 |
| chr14:60336952-60337461   | RTN1                         | 0.593864571 | 0.480930244 | 0.112934327  | 3  | 274 |
| chr3:125075916-125076481  |                              | 0.546598514 | 0.439430073 | 0.107168441  | 4  | 275 |
| chr10:31422710-31423316   |                              | 0.518271273 | 0.398340639 | 0.119930634  | 3  | 276 |
| chr1:217262999-217263214  |                              | 0.792983634 | 0.671683809 | 0.121299825  | 1  | 277 |
| chr9:115652447-115653448  | SLC46A2                      | 0.869214062 | 0.739607208 | 0.129606855  | 2  | 278 |
| chr13:113540351-113540558 |                              | 0.603915751 | 0.461294119 | 0.142621632  | 4  | 279 |
| chr12:69327022-69327532   |                              | 0.711857055 | 0.605493183 | 0.106363872  | 4  | 280 |
| chr15:57025348-57026150   |                              | 0.654186475 | 0.570009015 | 0.08417746   | 6  | 281 |
| chr5:114937614-114938149  |                              | 0.620454874 | 0.527405578 | 0.093049296  | 6  | 282 |
| chr4:75719102-75719740    | BTC                          | 0.655038651 | 0.52329564  | 0.131743012  | 4  | 283 |
| chr15:75248278-75249922   | SCAMP5;RPP25                 | 0.663781269 | 0.577867303 | 0.085913966  | 11 | 284 |
| chr13:29105412-29105676   |                              | 0.758551715 | 0.645155309 | 0.113396406  | 3  | 285 |
| chr11:64038965-64039306   |                              | 0.476993547 | 0.364817657 | 0.11217589   | 4  | 286 |
| chr11:18742691-18743513   |                              | 0.593877007 | 0.50725149  | 0.086625517  | 3  | 287 |
| chr2:242498014-242499274  | BOK;BOK-AS1                  | 0.637534819 | 0.542803678 | 0.094731141  | 7  | 288 |
| chr4:1049653-1049923      |                              | 0.838824155 | 0.724313743 | 0.114510412  | 3  | 289 |

|                           |           |             |             |              |    |     |
|---------------------------|-----------|-------------|-------------|--------------|----|-----|
| chr19:52674328-52674855   | ZNF836    | 0.227424804 | 0.144091865 | 0.083332939  | 3  | 290 |
| chr17:46669435-46669811   |           | 0.803691333 | 0.666862917 | 0.136828416  | 8  | 291 |
| chr6:168841439-168841699  | SMOC2     | 0.813947368 | 0.691416397 | 0.12253097   | 4  | 292 |
| chr16:3639093-3639306     |           | 0.789256998 | 0.670347658 | 0.11890934   | 1  | 293 |
| chr9:123605044-123605585  | PSMD5     | 0.865542479 | 0.732885531 | 0.132656948  | 4  | 294 |
| chr14:106025534-106026386 |           | 0.700229949 | 0.594820899 | 0.10540905   | 1  | 295 |
| chr12:120031495-120033212 | TMEM233   | 0.54575779  | 0.44888556  | 0.096872229  | 9  | 296 |
| chr19:46181221-46181455   |           | 0.862714402 | 0.732688471 | 0.130025931  | 4  | 297 |
| chr22:29467292-29467817   | KREMEN1   | 0.724908236 | 0.620091308 | 0.104816928  | 2  | 298 |
| chr5:114514717-114516220  | TRIM36    | 0.488066498 | 0.402489732 | 0.085576766  | 10 | 299 |
| chr14:24020003-24020251   |           | 0.428334079 | 0.32065738  | 0.107676699  | 3  | 300 |
| chr9:139580970-139582615  | AGPAT2    | 0.59748068  | 0.514678838 | 0.082801842  | 4  | 301 |
| chr19:11959578-11960064   | ZNF439    | 0.781482306 | 0.63555318  | 0.145929126  | 2  | 302 |
| chr17:42835777-42836242   | ADAM11    | 0.768516656 | 0.66554722  | 0.102969436  | 3  | 303 |
| chrY:4870745-4871225      |           | 0.543484464 | 0.384185967 | 0.159298497  | 1  | 304 |
| chr3:62354292-62355012    | PTPRG-AS1 | 0.853053721 | 0.733320068 | 0.119733653  | 4  | 305 |
| chr7:77669671-77670057    |           | 0.811595769 | 0.694568445 | 0.117027324  | 3  | 306 |
| chr10:11784408-11784937   | ECHDC3    | 0.818181777 | 0.701961276 | 0.1162205    | 3  | 307 |
| chr11:62476771-62477481   | BSCL2     | 0.596752439 | 0.507344136 | 0.089408303  | 9  | 308 |
| chr19:58554355-58554587   | LETM1P2   | 0.903272305 | 0.775199322 | 0.128072983  | 3  | 309 |
| chr16:34430776-34431004   |           | 0.580299739 | 0.666839431 | -0.086539692 | 3  | 310 |
| chr13:95359642-95359874   |           | 0.72504249  | 0.618749851 | 0.106292639  | 2  | 311 |
| chr2:127783082-127783311  |           | 0.622450691 | 0.518800981 | 0.103649711  | 3  | 312 |
| chrX:101906002-101907017  | GPRASP1   | 0.658612515 | 0.563297699 | 0.095314817  | 10 | 313 |
| chr6:168079012-168079213  |           | 0.751219737 | 0.639175349 | 0.112044388  | 3  | 314 |
| chr3:156008992-156009320  |           | 0.585607852 | 0.49080211  | 0.094805742  | 3  | 315 |
| chr20:49548195-49548525   | ADNP      | 0.75616286  | 0.645114806 | 0.111048054  | 3  | 316 |
| chr3:13696628-13697127    |           | 0.629209755 | 0.535211946 | 0.093997808  | 2  | 317 |
| chr10:81892223-81892640   |           | 0.65099996  | 0.556355773 | 0.094644186  | 3  | 318 |
| chr2:88469692-88470386    | THNSL2    | 0.651899758 | 0.555954835 | 0.095944923  | 4  | 319 |
| chr12:75601082-75601752   |           | 0.738726622 | 0.585882982 | 0.15284364   | 3  | 320 |
| chr19:47139338-47139547   | GNG8      | 0.856573868 | 0.733230722 | 0.123343146  | 3  | 321 |
| chr9:39078690-39079006    |           | 0.813739754 | 0.694586287 | 0.119153468  | 1  | 322 |
| chr12:54089212-54089413   |           | 0.837175048 | 0.714704895 | 0.122470153  | 1  | 323 |
| chr7:38350921-38351331    |           | 0.644570025 | 0.494141896 | 0.150428129  | 5  | 324 |
| chr13:36728963-36729267   |           | 0.806910545 | 0.695009561 | 0.111900984  | 5  | 325 |
| chr8:142425441-142425716  |           | 0.316795821 | 0.235334064 | 0.081461757  | 3  | 326 |
| chr11:64993281-64993484   |           | 0.647206335 | 0.55741035  | 0.089795985  | 2  | 327 |
| chr16:90148484-90148793   |           | 0.36416179  | 0.272028456 | 0.092133334  | 3  | 328 |
| chrY:14107138-14107480    |           | 0.669797091 | 0.838528942 | -0.168731851 | 1  | 329 |
| chr1:159158229-159158498  |           | 0.564270615 | 0.429388811 | 0.134881804  | 2  | 330 |
| chr14:29254366-29255069   |           | 0.874133796 | 0.752445861 | 0.121687935  | 5  | 331 |
| chr16:51189801-51190260   |           | 0.114043645 | 0.233265606 | -0.119221961 | 5  | 332 |
| chr7:21582444-21583313    | DNAH11    | 0.676406119 | 0.579528427 | 0.096877693  | 8  | 333 |
| chr6:150246753-150247257  |           | 0.753464717 | 0.660217426 | 0.093247291  | 4  | 334 |
| chr4:188916606-188916876  | ZFP42     | 0.845042466 | 0.725835335 | 0.119207131  | 8  | 335 |
| chr1:181454975-181455261  |           | 0.551744185 | 0.462403687 | 0.089340498  | 4  | 336 |
| chr13:28534433-28535560   |           | 0.669950137 | 0.571660255 | 0.098289882  | 5  | 337 |
| chr2:43037868-43038564    |           | 0.655786708 | 0.559977133 | 0.095809576  | 4  | 338 |
| chr12:122016171-122017693 |           | 0.886376139 | 0.763245481 | 0.123130658  | 5  | 339 |
| chr3:134369465-134370242  | KY        | 0.744720079 | 0.636383481 | 0.108336598  | 12 | 340 |
| chr7:75909704-75909906    |           | 0.879398859 | 0.752309545 | 0.127089314  | 1  | 341 |
| chr6:30068493-30068794    |           | 0.835473341 | 0.715332732 | 0.120140609  | 6  | 342 |
| chr7:27283409-27283614    |           | 0.862187365 | 0.73890642  | 0.123280946  | 3  | 343 |
| chr19:8407675-8408338     | KANK3     | 0.607529645 | 0.521217089 | 0.086312556  | 10 | 344 |
| chr1:32892429-32892835    | LRR37A12P | 0.653500214 | 0.559027301 | 0.094472913  | 1  | 345 |
| chr6:50810643-50810994    |           | 0.821644786 | 0.709734359 | 0.111910427  | 4  | 346 |
| chr2:128180295-128181381  | MIR4783   | 0.653932062 | 0.5592146   | 0.094717462  | 6  | 347 |
| chr20:30618794-30619138   |           | 0.815941017 | 0.71979872  | 0.096142297  | 4  | 348 |
| chr3:129345668-129346521  |           | 0.797789668 | 0.696194825 | 0.101594842  | 4  | 349 |
| chr7:156409024-156409294  |           | 0.76946695  | 0.662513457 | 0.106953493  | 3  | 350 |
| chr20:26188639-26190348   |           | 0.695478927 | 0.609332821 | 0.086146105  | 12 | 351 |
| chr1:22889596-22890096    | EPHA8     | 0.441886284 | 0.35284253  | 0.089043754  | 4  | 352 |
| chr12:131783094-131784199 | RNA5SP376 | 0.74519859  | 0.57518604  | 0.170012549  | 1  | 353 |
| chr1:221054555-221054888  | HLA-AS1   | 0.857142603 | 0.735686309 | 0.121456294  | 3  | 354 |
| chr7:112031476-112032181  |           | 0.403743318 | 0.323617357 | 0.080125961  | 2  | 355 |
| chr3:52279602-52280140    | PPM1M     | 0.690418174 | 0.5947904   | 0.095627773  | 8  | 356 |
| chr11:32460587-32461004   |           | 0.890303631 | 0.768970859 | 0.121332772  | 4  | 357 |
| chr19:53635626-53636230   | ZNF415    | 0.612848774 | 0.501561345 | 0.111287428  | 6  | 358 |
| chr3:129323916-129325332  | PLXND1    | 0.556915197 | 0.477024734 | 0.079890464  | 5  | 359 |
| chr2:207506775-207507422  |           | 0.679513581 | 0.571143159 | 0.108370421  | 6  | 360 |
| chr3:27756213-27756422    |           | 0.846169268 | 0.71639104  | 0.129778228  | 3  | 361 |
| chr17:38599670-38600306   | IGFBP4    | 0.649207026 | 0.550618289 | 0.098588737  | 3  | 362 |

|                           |                       |             |             |              |    |     |
|---------------------------|-----------------------|-------------|-------------|--------------|----|-----|
| chr6:43970074-43970922    |                       | 0.340434516 | 0.260931171 | 0.079503345  | 4  | 363 |
| chr9:139872238-139873143  | PTGDS                 | 0.839489417 | 0.725613044 | 0.113876373  | 4  | 364 |
| chr6:50787287-50788091    |                       | 0.764882223 | 0.65630322  | 0.108579004  | 4  | 365 |
| chr11:17497464-17498626   | ABCC8                 | 0.440577051 | 0.356146651 | 0.0844304    | 12 | 366 |
| chr6:75911580-75912133    |                       | 0.72455984  | 0.62214454  | 0.1024153    | 4  | 367 |
| chr1:166916866-166917215  |                       | 0.681654527 | 0.572842326 | 0.108812202  | 3  | 368 |
| chr16:30216739-30217851   |                       | 0.672482483 | 0.570366932 | 0.102115552  | 1  | 369 |
| chr19:49931204-49931804   |                       | 0.585574984 | 0.492404482 | 0.093170502  | 2  | 370 |
| chr3:139396339-139396882  | NMNAT3                | 0.623721096 | 0.53803664  | 0.085684456  | 4  | 371 |
| chr14:38060842-38062119   |                       | 0.763993896 | 0.659398592 | 0.104595304  | 4  | 372 |
| chr6:26217212-26217521    | HIST1H2AE;HIST1H2BG   | 0.636860194 | 0.547186289 | 0.089673905  | 3  | 373 |
| chr7:6566067-6566650      |                       | 0.788932416 | 0.682710276 | 0.10622214   | 3  | 374 |
| chr15:51633725-51634318   | GLDN                  | 0.743359743 | 0.642007107 | 0.101352636  | 4  | 375 |
| chr14:23821088-23822106   | SLC22A17              | 0.463535844 | 0.382448804 | 0.08108704   | 8  | 376 |
| chr9:130616620-130616858  | ENG                   | 0.820517546 | 0.705463984 | 0.115053561  | 1  | 377 |
| chr5:140767197-140767695  | PCDHGB4               | 0.550233032 | 0.46285852  | 0.087374512  | 7  | 378 |
| chr1:151300523-151300724  | PI4KB                 | 0.55083478  | 0.465223852 | 0.085610928  | 3  | 379 |
| chr16:84029457-84029710   |                       | 0.875734526 | 0.757923172 | 0.117811353  | 4  | 380 |
| chr1:149871080-149871946  |                       | 0.622078789 | 0.528531768 | 0.093547021  | 7  | 381 |
| chr5:178322714-178323538  | ZFP2                  | 0.774621141 | 0.662995063 | 0.111626079  | 6  | 382 |
| chr6:117591534-117592279  |                       | 0.832995226 | 0.715939971 | 0.117055255  | 4  | 383 |
| chr20:62947649-62948464   |                       | 0.212269099 | 0.095676352 | 0.116592747  | 3  | 384 |
| chr13:30982288-30982827   |                       | 0.205562009 | 0.127083196 | 0.078478813  | 3  | 385 |
| chr6:27858167-27858564    |                       | 0.840942221 | 0.720796186 | 0.120146035  | 3  | 386 |
| chr15:45408574-45409528   |                       | 0.857192431 | 0.743487014 | 0.113705417  | 4  | 387 |
| chr1:45308544-45309159    | PTCH2                 | 0.175885166 | 0.097483234 | 0.078401932  | 4  | 388 |
| chr3:9595186-9595533      | LHFPL4                | 0.563073117 | 0.481007651 | 0.082065466  | 2  | 389 |
| chr12:106975196-106975714 | RFX4                  | 0.602048704 | 0.51533251  | 0.086716194  | 3  | 390 |
| chr14:85997469-85998637   |                       | 0.482749551 | 0.389664446 | 0.093085106  | 6  | 391 |
| chr14:78432386-78432804   |                       | 0.757266187 | 0.646575175 | 0.110691012  | 3  | 392 |
| chr11:789872-790133       | CEND1                 | 0.073549491 | 0.151849627 | -0.078300136 | 2  | 393 |
| chr2:110872946-110873587  |                       | 0.700983909 | 0.590166714 | 0.110817195  | 4  | 394 |
| chr1:211589678-211590293  | SNX25P1               | 0.612073584 | 0.533816902 | 0.078256681  | 3  | 395 |
| chr9:23822413-23822667    |                       | 0.938541054 | 0.808321018 | 0.130220036  | 1  | 396 |
| chr12:7046238-7047257     |                       | 0.441987669 | 0.363814595 | 0.078173074  | 4  | 397 |
| chr2:173099483-173100098  |                       | 0.604708625 | 0.508617298 | 0.096091326  | 4  | 398 |
| chr19:39894559-39894768   |                       | 0.584663861 | 0.501557598 | 0.083106263  | 4  | 399 |
| chr17:21279507-21281574   | KCNJ12                | 0.767328225 | 0.666488852 | 0.100839373  | 16 | 400 |
| chr7:852961-853230        |                       | 0.442475849 | 0.342813482 | 0.099662367  | 3  | 401 |
| chr18:29303961-29304254   | LRRC37A7P             | 0.784200138 | 0.672413456 | 0.111786682  | 2  | 402 |
| chr8:1094751-1094967      |                       | 0.821261277 | 0.709307351 | 0.111953926  | 3  | 403 |
| chr15:51387533-51387755   |                       | 0.887243568 | 0.765093306 | 0.122150263  | 4  | 404 |
| chr2:220377744-220377946  | ASIC4                 | 0.753040939 | 0.650153509 | 0.10288743   | 3  | 405 |
| chr19:10542663-10543120   |                       | 0.797329665 | 0.688287152 | 0.109042512  | 2  | 406 |
| chr1:205537752-205538443  | MFSD4                 | 0.614111079 | 0.536497451 | 0.077613628  | 7  | 407 |
| chr12:113917395-113918107 |                       | 0.645677319 | 0.541867026 | 0.103810293  | 6  | 408 |
| chr9:115913082-115913807  | SLC31A2               | 0.494988491 | 0.306273433 | 0.188715058  | 3  | 409 |
| chr4:3485964-3486381      |                       | 0.722346594 | 0.626568646 | 0.095777948  | 4  | 410 |
| chr2:172951290-172952159  |                       | 0.883075343 | 0.76258133  | 0.120494013  | 5  | 411 |
| chr4:174448334-174448845  | HAND2-AS1             | 0.909816654 | 0.78850854  | 0.121308114  | 4  | 412 |
| chr7:993402-994574        | ADAP1                 | 0.364066801 | 0.283578869 | 0.080487932  | 2  | 413 |
| chr7:131242694-131243006  | PODXL                 | 0.7178563   | 0.620353573 | 0.097502727  | 3  | 414 |
| chr9:503937-505722        |                       | 0.646648005 | 0.535936646 | 0.110711359  | 5  | 415 |
| chr19:2462065-2462442     |                       | 0.882458658 | 0.762206601 | 0.120252057  | 2  | 416 |
| chr2:119602617-119604486  |                       | 0.749005197 | 0.647900885 | 0.101104311  | 13 | 417 |
| chr19:49340489-49340774   | HSD17B14              | 0.703103142 | 0.60859633  | 0.094506811  | 4  | 418 |
| chr16:31008833-31009036   |                       | 0.786251236 | 0.678530291 | 0.107720945  | 2  | 419 |
| chr3:160822495-160823260  | NMD3;B3GALNT1         | 0.70533334  | 0.605168949 | 0.100164391  | 8  | 420 |
| chr4:185939223-185942747  | HELT                  | 0.654833452 | 0.561926001 | 0.092907452  | 28 | 421 |
| chr20:21000766-21001280   |                       | 0.902833992 | 0.787097872 | 0.11573612   | 3  | 422 |
| chr11:124628368-124629590 |                       | 0.857492023 | 0.747923346 | 0.109568678  | 3  | 423 |
| chr18:76069223-76069699   |                       | 0.59255707  | 0.710695565 | -0.118138495 | 4  | 424 |
| chr15:83001661-83002634   |                       | 0.302843779 | 0.226212743 | 0.076631035  | 1  | 425 |
| chr15:96904723-96905050   |                       | 0.896458556 | 0.77643429  | 0.120024266  | 3  | 426 |
| chr6:27833121-27833406    | HIST1H2AL;HIST1H2BPS2 | 0.57725782  | 0.482647606 | 0.094610214  | 4  | 427 |
| chr3:170303533-170303768  | SLC7A14               | 0.608322381 | 0.525773042 | 0.082549338  | 3  | 428 |
| chr6:38682950-38683265    | DNAH8                 | 0.873111752 | 0.756698952 | 0.1164128    | 3  | 429 |
| chr17:77903888-77904397   |                       | 0.542293621 | 0.465916528 | 0.076377092  | 5  | 430 |
| chr2:132182328-132183101  | GNAQP1                | 0.772669731 | 0.659035557 | 0.113634174  | 3  | 431 |
| chr3:126108020-126108488  |                       | 0.312541669 | 0.236243581 | 0.076298088  | 3  | 432 |
| chr16:49314038-49316543   | CBLN1                 | 0.618186304 | 0.516737512 | 0.101448792  | 10 | 433 |
| chr1:87617693-87617986    |                       | 0.830402604 | 0.716772188 | 0.113630416  | 4  | 434 |
| chrX:136134511-136135269  |                       | 0.792743252 | 0.686479011 | 0.106264242  | 3  | 435 |

|                           |                     |             |             |              |    |     |
|---------------------------|---------------------|-------------|-------------|--------------|----|-----|
| chr2:176956505-176956707  | HOXD13              | 0.908973667 | 0.781259848 | 0.127713818  | 2  | 436 |
| chr1:50882434-50882660    |                     | 0.919787034 | 0.795873746 | 0.123913288  | 1  | 437 |
| chr11:119612092-119612476 |                     | 0.371172314 | 0.273866116 | 0.097306198  | 3  | 438 |
| chr16:67208068-67208678   |                     | 0.398275108 | 0.322261287 | 0.076013821  | 3  | 439 |
| chr16:56650982-56651384   | MT1L                | 0.78231176  | 0.651850616 | 0.130461145  | 4  | 440 |
| chr20:44685772-44687610   |                     | 0.821609114 | 0.711453594 | 0.11015552   | 4  | 441 |
| chr14:89493136-89494382   |                     | 0.710711477 | 0.632594569 | 0.078116908  | 5  | 442 |
| chr11:126873092-126873809 | KIRREL3-AS3;KIRREL3 | 0.300639377 | 0.224868294 | 0.075771083  | 6  | 443 |
| chr10:16561605-16563822   | C1QL3               | 0.654757659 | 0.578504574 | 0.076253085  | 8  | 444 |
| chr10:135203102-135203316 |                     | 0.851155789 | 0.738412247 | 0.112743542  | 2  | 445 |
| chr12:7023262-7024089     | ENO2                | 0.478276232 | 0.402653545 | 0.075622687  | 11 | 446 |
| chr2:177042752-177043444  |                     | 0.641660539 | 0.553053362 | 0.088607177  | 5  | 447 |
| chr7:976648-976894        |                     | 0.735560329 | 0.849041004 | -0.113480675 | 1  | 448 |
| chr4:42152767-42154984    | BEND4               | 0.547984959 | 0.417005617 | 0.130979342  | 12 | 449 |
| chrX:36975506-36976349    |                     | 0.630525776 | 0.54710624  | 0.083419536  | 4  | 450 |
| chr10:135039938-135040196 |                     | 0.874322165 | 0.758629456 | 0.115692708  | 3  | 451 |
| chr3:50230431-50232344    |                     | 0.732842335 | 0.647868615 | 0.08497372   | 5  | 452 |
| chr9:14346266-14348149    |                     | 0.874381499 | 0.742629794 | 0.131751705  | 3  | 453 |
| chr2:175204844-175207553  |                     | 0.731188812 | 0.627326481 | 0.103862331  | 13 | 454 |
| chr15:98971491-98971876   |                     | 0.162551762 | 0.087323407 | 0.075228355  | 3  | 455 |
| chr17:58212843-58213193   |                     | 0.649583193 | 0.562646261 | 0.086936932  | 5  | 456 |
| chr5:172068287-172069174  | NEURL1B             | 0.815896258 | 0.714900267 | 0.100995991  | 3  | 457 |
| chr8:124172801-124173541  |                     | 0.892191803 | 0.774557789 | 0.117634015  | 5  | 458 |
| chr1:9242168-9243827      |                     | 0.781596229 | 0.685546422 | 0.096049807  | 7  | 459 |
| chr6:106958233-106958718  | AIM1                | 0.798678302 | 0.694013287 | 0.104665016  | 5  | 460 |
| chr6:28457569-28457926    |                     | 0.894088854 | 0.756489076 | 0.137599779  | 2  | 461 |
| chr11:111383169-111383892 | MIR34B;BTG4;MIR34C  | 0.650437116 | 0.543408314 | 0.107028802  | 8  | 462 |
| chr12:65514879-65515863   | WIF1                | 0.700438927 | 0.619224792 | 0.081214135  | 7  | 463 |
| chr5:95768875-95769080    |                     | 0.593141311 | 0.502538914 | 0.090602397  | 7  | 464 |
| chr10:43361553-43362350   |                     | 0.696799923 | 0.609811215 | 0.086988707  | 5  | 465 |
| chr16:85203158-85203941   |                     | 0.761411793 | 0.660427595 | 0.100984198  | 2  | 466 |
| chr18:77280145-77280414   |                     | 0.925305304 | 0.803567685 | 0.121737619  | 3  | 467 |
| chr12:52701963-52702560   |                     | 0.615304161 | 0.504341501 | 0.110962659  | 5  | 468 |
| chr12:12849068-12849270   | GPR19               | 0.579607005 | 0.504693255 | 0.074913749  | 7  | 469 |
| chr3:147142182-147142391  |                     | 0.904820191 | 0.785469508 | 0.119350683  | 3  | 470 |
| chr4:169799087-169799625  |                     | 0.873097951 | 0.743466465 | 0.129631486  | 3  | 471 |
| chr1:18971730-18972097    |                     | 0.897806561 | 0.780065351 | 0.11774121   | 3  | 472 |
| chr20:61339859-61341220   | NTSR1               | 0.645822465 | 0.570379098 | 0.075443367  | 9  | 473 |
| chr9:140040092-140040698  |                     | 0.805777212 | 0.699393666 | 0.106383546  | 1  | 474 |
| chr8:65281904-65283043    |                     | 0.71542011  | 0.591577592 | 0.123842518  | 5  | 475 |
| chr20:57581903-57582595   | CTSZ                | 0.72173558  | 0.628749246 | 0.092986334  | 9  | 476 |
| chr14:89017661-89017972   |                     | 0.666607879 | 0.578794445 | 0.087813435  | 2  | 477 |
| chr17:35289389-35289623   |                     | 0.723258974 | 0.6289898   | 0.094269174  | 2  | 478 |
| chr7:129142172-129143038  | SMKR1               | 0.530313055 | 0.453210692 | 0.077102363  | 4  | 479 |
| chr2:233925092-233925318  | INPP5D              | 0.835791562 | 0.715852138 | 0.119939424  | 2  | 480 |
| chr2:66652692-66654218    |                     | 0.59660553  | 0.489329213 | 0.107276317  | 6  | 481 |
| chr10:118927022-118928132 | MIR3663             | 0.690615198 | 0.604906384 | 0.085708814  | 5  | 482 |
| chr20:57463653-57467739   |                     | 0.613647028 | 0.524434376 | 0.089212653  | 54 | 483 |
| chrX:152909014-152909214  |                     | 0.508496088 | 0.434281358 | 0.07421473   | 3  | 484 |
| chr19:1766145-1766364     |                     | 0.675019917 | 0.572525102 | 0.102494816  | 2  | 485 |
| chr15:75470912-75471212   |                     | 0.72355907  | 0.624988409 | 0.098570661  | 4  | 486 |
| chr11:22454301-22454518   |                     | 0.879734971 | 0.767391422 | 0.112343549  | 3  | 487 |
| chr1:75595814-75596162    |                     | 0.868569963 | 0.738878972 | 0.129690992  | 3  | 488 |
| chr12:50297581-50297988   | FAIM2               | 0.814068042 | 0.707348146 | 0.106719896  | 6  | 489 |
| chr2:8723856-8724093      |                     | 0.690193114 | 0.589023586 | 0.101169528  | 3  | 490 |
| chr3:196255496-196256013  |                     | 0.906197033 | 0.788385903 | 0.11781113   | 4  | 491 |
| chr8:2480426-2480920      |                     | 0.604714002 | 0.530778172 | 0.073935829  | 3  | 492 |
| chr5:172386894-172387102  |                     | 0.523979503 | 0.450134768 | 0.073844736  | 3  | 493 |
| chr19:8674333-8674764     |                     | 0.320282825 | 0.404336011 | -0.084053186 | 2  | 494 |
| chr15:90293222-90294733   | MRPL15P1;MESP1      | 0.605910302 | 0.526627441 | 0.079282861  | 9  | 495 |
| chr7:97361133-97363018    | TAC1                | 0.650259168 | 0.487890135 | 0.162369033  | 10 | 496 |
| chrX:53713069-53713794    | HUWE1               | 0.45369692  | 0.374626156 | 0.079070763  | 7  | 497 |
| chr4:379900-380399        |                     | 0.719830013 | 0.622317142 | 0.097512871  | 4  | 498 |
| chr1:43832815-43833073    |                     | 0.846196165 | 0.738682038 | 0.107514126  | 3  | 499 |
| chr7:27231806-27233097    |                     | 0.640724984 | 0.557625015 | 0.083099969  | 7  | 500 |

**Supplementary Table S13. Statistical overrepresentation test of top-ranked, differentially methylated promoters, gene bodies and CGIs.**  
 This table is related to Fig. 3. The top-ranked, differentially methylated promoters, gene bodies and CGIs that showed a methylation decrease after *TET1* overexpression or a methylation increase after *TET* triple knockdown were analyzed using the PANTHER Overrepresentation Test with default settings.

Analysis Type: PANTHER Overrepresentation Test (release 20150430)  
 Annotation Version and Release Date: PANTHER version 10.0 Released 2015-05-15  
 Bonferroni correction for multiple testing  
 Annotation Data Set: PANTHER GO-Slim Biological Process

Reference List:  
 Homo sapiens (all genes in database)  
 Mapped IDs:  
 Unmapped IDs:

Reference list  
 20814  
 0

Displaying only results with P<0.05

| Homo sapiens (REF)                                             | <i>TET1</i> overexpression                               |                 |      |         |                                                            |          |                 |     |                                                                                |    |          |                 | <i>TET</i> triple knockdown                               |            |    |          |                                                             |     |            |   |                                                                                 |                 |     |         |  |
|----------------------------------------------------------------|----------------------------------------------------------|-----------------|------|---------|------------------------------------------------------------|----------|-----------------|-----|--------------------------------------------------------------------------------|----|----------|-----------------|-----------------------------------------------------------|------------|----|----------|-------------------------------------------------------------|-----|------------|---|---------------------------------------------------------------------------------|-----------------|-----|---------|--|
|                                                                | Top-ranked 416 hypomethylated promoters (297 mapped IDs) |                 |      |         | Top-ranked 416 hypomethylated gene bodies (306 mapped IDs) |          |                 |     | Top-ranked 375 hypomethylated CGIs (159 promoter associations, 137 mapped IDs) |    |          |                 | Top-ranked 424 hypermethylated promoters (341 mapped IDs) |            |    |          | Top-ranked 381 hypermethylated gene bodies (281 mapped IDs) |     |            |   | Top-ranked 486 hypermethylated CGIs (213 promoter associations, 182 mapped IDs) |                 |     |         |  |
| #                                                              | expected                                                 | Fold Enrichment | +/-  | P value | #                                                          | expected | Fold Enrichment | +/- | P value                                                                        | #  | expected | Fold Enrichment | +/-                                                       | P value    | #  | expected | Fold Enrichment                                             | +/- | P value    | # | expected                                                                        | Fold Enrichment | +/- | P value |  |
| <b>PANTHER GO-Slim Biological Process</b>                      |                                                          |                 |      |         |                                                            |          |                 |     |                                                                                |    |          |                 |                                                           |            |    |          |                                                             |     |            |   |                                                                                 |                 |     |         |  |
| sensory perception of smell                                    | 30                                                       |                 |      |         | 5                                                          | .44      | > 5             |     | + 2.08E-02                                                                     |    |          |                 |                                                           |            |    |          |                                                             |     |            |   |                                                                                 |                 |     |         |  |
| sensory perception of chemical stimulus                        | 133                                                      | 9               | 1.90 | 4.74    | + 3.32E-02                                                 | 16       | 1.96            | > 5 | + 5.66E-08                                                                     |    |          |                 |                                                           |            |    |          |                                                             |     |            |   |                                                                                 |                 |     |         |  |
| sensory perception                                             | 455                                                      |                 |      |         | 26                                                         | 6.69     | 3.89            |     | + 1.41E-06                                                                     |    |          |                 |                                                           |            |    |          |                                                             |     |            |   |                                                                                 |                 |     |         |  |
| neurological system process                                    | 1064                                                     |                 |      |         | 37                                                         | 15.64    | 2.37            |     | + 3.05E-04                                                                     |    |          |                 |                                                           |            |    |          |                                                             |     |            |   |                                                                                 |                 |     |         |  |
| system process                                                 | 1296                                                     |                 |      |         | 41                                                         | 19.05    | 2.15            |     | + 8.15E-04                                                                     |    |          |                 |                                                           |            |    |          |                                                             |     |            |   |                                                                                 |                 |     |         |  |
| response to stimulus                                           | 2170                                                     |                 |      |         | 59                                                         | 31.90    | 1.85            |     | + 6.22E-04                                                                     |    |          |                 |                                                           |            |    |          |                                                             |     |            |   |                                                                                 |                 |     |         |  |
| immune system process                                          | 1391                                                     |                 |      |         |                                                            |          |                 |     |                                                                                | 41 | 22.79    | 1.80            |                                                           | + 4.86E-02 |    |          |                                                             |     |            |   |                                                                                 |                 |     |         |  |
| regulation of biological process                               | 2846                                                     |                 |      |         |                                                            |          |                 |     |                                                                                |    |          |                 |                                                           |            | 69 | 38.42    | 1.80                                                        |     | + 1.68E-04 |   |                                                                                 |                 |     |         |  |
| biological regulation                                          | 3918                                                     |                 |      |         |                                                            |          |                 |     |                                                                                |    |          |                 |                                                           |            | 80 | 52.90    | 1.51                                                        |     | + 1.24E-02 |   |                                                                                 |                 |     |         |  |
| regulation of transcription from RNA polymerase II promoter    | 1319                                                     |                 |      |         |                                                            |          |                 |     |                                                                                |    |          |                 |                                                           |            | 38 | 17.81    | 2.13                                                        |     | + 2.15E-03 |   |                                                                                 |                 |     |         |  |
| system development                                             | 1271                                                     |                 |      |         |                                                            |          |                 |     |                                                                                |    |          |                 |                                                           |            | 34 | 17.16    | 1.98                                                        |     | + 2.77E-02 |   |                                                                                 |                 |     |         |  |
| regulation of nucleobase-containing compound metabolic process | 1700                                                     |                 |      |         |                                                            |          |                 |     |                                                                                |    |          |                 |                                                           |            | 43 | 22.95    | 1.87                                                        |     | + 1.19E-02 |   |                                                                                 |                 |     |         |  |

**Supplementary Table S14. List of promoters consistently identified among the 500 top-ranked, differentially methylated promoters after induced overexpression of *TET1* and *TET* triple knockdown.**

This table is related to Fig. 3 comprising the overlap between the *TET1* overexpression and *TET* triple knockdown experiments.

| gene_symbol | beta.TET1+Dox | beta.TET1-Dox | TET1_difference | TET1_num.sites | beta.GFP_siRNA | beta.GFP_scramble | knockdown_difference | knockdown_num.sites |
|-------------|---------------|---------------|-----------------|----------------|----------------|-------------------|----------------------|---------------------|
| ACAA1       | 0.33402133    | 0.402702498   | -0.068681167    | 13             | 0.380117371    | 0.31063283        | 0.069484541          | 13                  |
| ARMCX6      | 0.204246765   | 0.282291302   | -0.078044537    | 8              | 0.243886855    | 0.312651082       | -0.068764228         | 8                   |
| C1QTNF4     | 0.654737713   | 0.720644388   | -0.065906675    | 5              | 0.746164884    | 0.657096254       | 0.08906863           | 5                   |
| C4orf50     | 0.811258733   | 0.700638669   | 0.110620065     | 1              | 0.719515635    | 0.833124271       | -0.113608635         | 1                   |
| CIRH1A      | 0.546355042   | 0.644709125   | -0.098354082    | 1              | 0.654101875    | 0.5129905         | 0.141111375          | 1                   |
| CLCF1       | 0.49492381    | 0.54273789    | -0.04781408     | 13             | 0.568530164    | 0.476549692       | 0.091980471          | 13                  |
| COX20P2     | 0.142533866   | 0.218190525   | -0.075656658    | 2              | 0.253266074    | 0.149507768       | 0.103758306          | 2                   |
| COX6B2      | 0.381588895   | 0.450391158   | -0.068802263    | 13             | 0.462568207    | 0.377686146       | 0.084882061          | 13                  |
| CPQ         | 0.321350615   | 0.361370538   | -0.040019923    | 14             | 0.413416776    | 0.291645524       | 0.121771252          | 14                  |
| CPT1A       | 0.556098075   | 0.693028314   | -0.136930239    | 3              | 0.699526938    | 0.499549048       | 0.19997789           | 3                   |
| CRK         | 0.67395123    | 0.598618494   | 0.075332736     | 4              | 0.602656511    | 0.675773953       | -0.073117443         | 4                   |
| CYP11B1     | 0.491275045   | 0.549272259   | -0.057997214    | 6              | 0.516954597    | 0.583917842       | -0.066963245         | 6                   |
| CYP4A22     | 0.467276449   | 0.542546126   | -0.075269677    | 2              | 0.48491709     | 0.576056714       | -0.091139624         | 2                   |
| CYP4F22     | 0.511350166   | 0.600366895   | -0.089016729    | 7              | 0.61692204     | 0.533794616       | 0.083127424          | 7                   |
| DOK7        | 0.471055401   | 0.548305757   | -0.077250356    | 11             | 0.585459882    | 0.448477239       | 0.136982643          | 11                  |
| DUSP26      | 0.528877195   | 0.595269906   | -0.066392711    | 9              | 0.590337147    | 0.500434818       | 0.089902329          | 9                   |
| EEF1G       | 0.455468399   | 0.525494553   | -0.070026154    | 5              | 0.550547373    | 0.450469717       | 0.100077656          | 5                   |
| FAM122A     | 0.235431315   | 0.274791109   | -0.039359794    | 5              | 0.298608774    | 0.225558804       | 0.073049971          | 5                   |
| FAM19A1     | 0.368223896   | 0.412008588   | -0.043784693    | 3              | 0.337819775    | 0.53697208        | -0.199152305         | 3                   |
| GGCT        | 0.468707162   | 0.558132768   | -0.089425606    | 1              | 0.618579549    | 0.451710697       | 0.166868851          | 1                   |
| GPR62       | 0.724576193   | 0.822070389   | -0.097494196    | 4              | 0.824791469    | 0.706994498       | 0.117796971          | 4                   |
| GXYLT2      | 0.282071756   | 0.324148456   | -0.0420767      | 2              | 0.377215558    | 0.261845935       | 0.115369622          | 2                   |
| HNRNPDP2    | 0.56156639    | 0.756302233   | -0.194735843    | 1              | 0.826573871    | 0.584769795       | 0.241804076          | 1                   |
| IFI44       | 0.190210932   | 0.409157366   | -0.218946433    | 1              | 0.445539999    | 0.320774672       | 0.124765328          | 1                   |
| LINC00152   | 0.090986619   | 0.149973451   | -0.058986831    | 1              | 0.230185838    | 0.091484864       | 0.138700974          | 1                   |
| LRAT        | 0.538414712   | 0.599761928   | -0.061347216    | 8              | 0.619540329    | 0.49856906        | 0.120971269          | 8                   |
| MIR3663     | 0.7116284     | 0.636355755   | 0.075272645     | 5              | 0.690615198    | 0.604906384       | 0.085708814          | 5                   |
| MIR509-2    | 0.128498339   | 0.25125834    | -0.122760001    | 1              | 0.343185798    | 0.230476963       | 0.112708836          | 1                   |
| MYD88       | 0.367254643   | 0.453860153   | -0.086605511    | 14             | 0.42813918     | 0.340470394       | 0.087668786          | 14                  |
| NAA60       | 0.569726458   | 0.628856609   | -0.059130151    | 12             | 0.645648898    | 0.545434584       | 0.100214314          | 12                  |
| NQO1        | 0.117283628   | 0.157101141   | -0.039817513    | 8              | 0.180235294    | 0.114544544       | 0.065690751          | 8                   |
| OR2L3       | 0.30883153    | 0.47607148    | -0.16723995     | 1              | 0.344214061    | 0.574729546       | -0.230515485         | 1                   |
| OXCT1       | 0.437022727   | 0.50771127    | -0.070688543    | 11             | 0.55939244     | 0.409200929       | 0.150191511          | 11                  |
| RARRES2P9   | 0.376391238   | 0.29120189    | 0.085189348     | 2              | 0.265107525    | 0.398350781       | -0.133243257         | 2                   |
| RN7SL718P   | 0.614410101   | 0.710849891   | -0.09643979     | 1              | 0.705530994    | 0.596119556       | 0.109411438          | 1                   |
| RN7SL805P   | 0.39323438    | 0.476962616   | -0.083728237    | 1              | 0.511092418    | 0.393292289       | 0.117800129          | 1                   |
| RNU6-835P   | 0.434682969   | 0.636897619   | -0.20221465     | 1              | 0.670996225    | 0.452934671       | 0.218061554          | 1                   |
| RNU6-871P   | 0.291973039   | 0.345505494   | -0.053532455    | 1              | 0.291540538    | 0.382261083       | -0.090720545         | 1                   |
| SCNM1       | 0.596380946   | 0.668133561   | -0.071752616    | 6              | 0.67362423     | 0.59779299        | 0.07583124           | 6                   |
| SEMA4C      | 0.366808358   | 0.318532672   | 0.048275686     | 3              | 0.369894224    | 0.281387118       | 0.088507106          | 3                   |
| SLC2A3      | 0.591014614   | 0.662066054   | -0.07105144     | 7              | 0.672101794    | 0.576715748       | 0.095386046          | 7                   |
| SMARCD3     | 0.411091042   | 0.31552861    | 0.095562432     | 1              | 0.438274867    | 0.273492898       | 0.164781969          | 1                   |
| SPANXA1     | 0.377170654   | 0.604684169   | -0.227513514    | 1              | 0.575277151    | 0.393644772       | 0.181632379          | 1                   |
| SUMO2P6     | 0.644989824   | 0.743875575   | -0.098885751    | 1              | 0.755019311    | 0.627628364       | 0.127390947          | 1                   |
| SYTL1       | 0.401682955   | 0.454068452   | -0.052385497    | 8              | 0.454499494    | 0.389241763       | 0.065257732          | 8                   |
| TGFBR3L     | 0.45352614    | 0.503323177   | -0.049797037    | 4              | 0.526641361    | 0.428056909       | 0.098584452          | 4                   |
| TNFAIP8L2   | 0.596380946   | 0.668133561   | -0.071752616    | 6              | 0.67362423     | 0.59779299        | 0.07583124           | 6                   |
| TRAV8-5     | 0.27917838    | 0.327653481   | -0.048475101    | 2              | 0.296269163    | 0.445392079       | -0.149122916         | 2                   |
| UBQLNL      | 0.257735609   | 0.402688267   | -0.144952658    | 3              | 0.339269032    | 0.499558035       | -0.160289004         | 3                   |
| UGT2B10     | 0.216353361   | 0.373730151   | -0.15737679     | 1              | 0.262270701    | 0.489231258       | -0.226960557         | 1                   |
| WDR86       | 0.41709132    | 0.46556177    | -0.048470451    | 5              | 0.481977442    | 0.39214589        | 0.089831553          | 5                   |
| ZNF597      | 0.543079797   | 0.609847164   | -0.066767366    | 12             | 0.626807016    | 0.515406588       | 0.111400428          | 12                  |
| ZNF619      | 0.328104223   | 0.370794843   | -0.042690621    | 8              | 0.430482083    | 0.322281102       | 0.108200981          | 8                   |



**Supplementary Table S15. List of gene bodies consistently identified among the 500 top-ranked, differentially methylated gene bodies after induced overexpression of *TET1* and *TET* triple knockdown.**

This table is related to Fig. 3 comprising the overlap between the *TET1* overexpression and *TET* triple knockdown experiments.

| gene_symbol  | beta.TET1+Dox | beta.TET1-Dox | TET1_difference | TET1_num.sites | beta.GFP_siRNA | beta.GFP_scramble | knockdown_difference | knockdown_num.sites |
|--------------|---------------|---------------|-----------------|----------------|----------------|-------------------|----------------------|---------------------|
| ABCA10       | 0.535260991   | 0.671412314   | -0.136151323    | 2              | 0.705940899    | 0.521642589       | 0.18429831           | 2                   |
| ANKRD18EP    | 0.211236362   | 0.315042136   | -0.103805774    | 1              | 0.244070825    | 0.386553242       | -0.142482417         | 1                   |
| ARHGAP31-AS1 | 0.41066884    | 0.453971879   | -0.043303039    | 5              | 0.466907648    | 0.393697071       | 0.073210577          | 5                   |
| C6orf164     | 0.618121124   | 0.679469908   | -0.061348784    | 1              | 0.713877763    | 0.597036957       | 0.116840807          | 1                   |
| CCL8         | 0.759711522   | 0.835377091   | -0.075665569    | 2              | 0.837127409    | 0.76093496        | 0.07619245           | 2                   |
| CD163        | 0.649384596   | 0.544308805   | 0.105075791     | 1              | 0.558732453    | 0.642498208       | -0.083765754         | 1                   |
| CNTN4-AS1    | 0.722850149   | 0.589800326   | 0.133049823     | 3              | 0.59532262     | 0.717451551       | -0.122128931         | 3                   |
| DNM1P50      | 0.398751655   | 0.532782057   | -0.134030402    | 1              | 0.410288468    | 0.642215188       | -0.23192672          | 1                   |
| DUSP26       | 0.627180164   | 0.674729867   | -0.047549703    | 11             | 0.677488494    | 0.595819875       | 0.081668619          | 11                  |
| ENDOG        | 0.597341651   | 0.64928922    | -0.051947568    | 3              | 0.658068344    | 0.605025221       | 0.053043122          | 3                   |
| GPR112       | 0.425510218   | 0.495628046   | -0.070117828    | 2              | 0.456647354    | 0.540829135       | -0.084181781         | 2                   |
| HIST1H2AI    | 0.290981254   | 0.329098503   | -0.03811725     | 4              | 0.336602573    | 0.28730451        | 0.049298063          | 4                   |
| HIST1H2AL    | 0.489764861   | 0.591924222   | -0.102159361    | 7              | 0.60637817     | 0.464564059       | 0.141814112          | 7                   |
| HNRNPDP2     | 0.56156639    | 0.756302233   | -0.194735843    | 1              | 0.826573871    | 0.584769795       | 0.241804076          | 1                   |
| IFI44        | 0.550823843   | 0.749275687   | -0.198451845    | 1              | 0.692783086    | 0.540085647       | 0.152697438          | 1                   |
| IGFL1        | 0.722117696   | 0.618978303   | 0.103139393     | 3              | 0.611509741    | 0.766367049       | -0.154857308         | 3                   |
| IL10RB-AS1   | 0.73149031    | 0.696301369   | 0.03518894      | 5              | 0.749480497    | 0.644478395       | 0.105002102          | 5                   |
| KIAA0125     | 0.185505799   | 0.261840107   | -0.076334308    | 1              | 0.188952991    | 0.291685577       | -0.102732585         | 1                   |
| KRTAP1-3     | 0.783952173   | 0.88561266    | -0.101660487    | 1              | 0.788951097    | 0.895594835       | -0.106643738         | 1                   |
| LINC00525    | 0.427171501   | 0.296143754   | 0.131027747     | 1              | 0.488972232    | 0.319095233       | 0.169876999          | 1                   |
| MAST4-AS1    | 0.15643913    | 0.260674784   | -0.104235654    | 1              | 0.379657843    | 0.196805441       | 0.182852402          | 1                   |
| MBOAT4       | 0.681341303   | 0.466859742   | 0.214481562     | 1              | 0.68359969     | 0.546443384       | 0.137156306          | 1                   |
| MIR3678      | 0.181013651   | 0.303421423   | -0.122407772    | 1              | 0.422579473    | 0.15118847        | 0.271391002          | 1                   |
| MIR4710      | 0.351035927   | 0.399263277   | -0.048227349    | 1              | 0.466140878    | 0.285173084       | 0.180967794          | 1                   |
| MIR4724      | 0.352491041   | 0.519825852   | -0.167334811    | 1              | 0.453431012    | 0.624707014       | -0.171276002         | 1                   |
| MIR518C      | 0.108387866   | 0.16645225    | -0.058064384    | 1              | 0.141911868    | 0.258660866       | -0.116748998         | 1                   |
| MIR648       | 0.374557592   | 0.50826036    | -0.133702768    | 1              | 0.52371044     | 0.399042147       | 0.124668293          | 1                   |
| OR4F5        | 0.631094079   | 0.704142746   | -0.073048667    | 1              | 0.756368899    | 0.665798433       | 0.090570466          | 1                   |
| OR4S2        | 0.295539077   | 0.392350061   | -0.096810984    | 1              | 0.355247561    | 0.550900911       | -0.19565335          | 1                   |
| OR4X2        | 0.558089881   | 0.383374686   | 0.174715195     | 1              | 0.312089001    | 0.596018714       | -0.283929713         | 1                   |
| OXCT1-AS1    | 0.326376411   | 0.412767809   | -0.086391398    | 9              | 0.475758851    | 0.294603602       | 0.181155249          | 9                   |
| PNPLA4       | 0.444095975   | 0.378720719   | 0.065375256     | 13             | 0.441556025    | 0.3678369         | 0.073719125          | 13                  |
| PTGR1        | 0.520547184   | 0.606669851   | -0.086122667    | 4              | 0.588839604    | 0.509616864       | 0.07922274           | 4                   |
| RARRES2P9    | 0.575452245   | 0.430186482   | 0.145265763     | 1              | 0.376919186    | 0.600236185       | -0.223316999         | 1                   |
| RHOT1P2      | 0.651137259   | 0.589422372   | 0.061714887     | 1              | 0.578292671    | 0.661853422       | -0.083560751         | 1                   |
| RNASE6       | 0.645825714   | 0.710266452   | -0.064440738    | 3              | 0.734130018    | 0.601184613       | 0.132945405          | 3                   |
| SDC4P        | 0.725687942   | 0.663786077   | 0.061901865     | 1              | 0.752530912    | 0.672164038       | 0.080366874          | 1                   |
| SH2D1B       | 0.588298656   | 0.662289944   | -0.073991288    | 3              | 0.708799263    | 0.641963839       | 0.066835424          | 3                   |
| SLC2A3       | 0.3552381     | 0.438416279   | -0.083178179    | 3              | 0.472470291    | 0.345519383       | 0.126950908          | 3                   |
| SNORA69      | 0.178096415   | 0.344683956   | -0.166587541    | 1              | 0.207048927    | 0.387104346       | -0.18005542          | 1                   |
| SNORD3D      | 0.161783585   | 0.202076184   | -0.040292599    | 2              | 0.225060269    | 0.160985699       | 0.06407457           | 2                   |
| SPANXA2-OT1  | 0.377170654   | 0.604684169   | -0.227513514    | 1              | 0.575277151    | 0.393644772       | 0.181632379          | 1                   |
| SSMEM1       | 0.735856773   | 0.684907626   | 0.050949147     | 3              | 0.677739834    | 0.75705203        | -0.079312196         | 3                   |
| SSX6         | 0.708776545   | 0.805925415   | -0.09714887     | 1              | 0.855967859    | 0.730884876       | 0.125082982          | 1                   |
| TRAT1        | 0.197950643   | 0.34080076    | -0.142850118    | 1              | 0.260941823    | 0.403044926       | -0.142103103         | 1                   |
| TSPY11P      | 0.208383156   | 0.257553544   | -0.049170388    | 1              | 0.29754117     | 0.242226944       | 0.055314226          | 1                   |
| TUBB8P9      | 0.477809657   | 0.542452902   | -0.064643246    | 1              | 0.484069941    | 0.573834316       | -0.089764375         | 1                   |
| UGT2B10      | 0.216353361   | 0.373730151   | -0.15737679     | 1              | 0.262270701    | 0.489231258       | -0.226960557         | 1                   |
| ZNF597       | 0.611742957   | 0.665626381   | -0.053883424    | 8              | 0.676892355    | 0.588663434       | 0.088228921          | 8                   |
| ZNF619       | 0.467897022   | 0.508572727   | -0.040675705    | 8              | 0.557771623    | 0.471097224       | 0.086674399          | 8                   |
| ZNF66        | 0.268521463   | 0.23486394    | 0.033657524     | 1              | 0.210000697    | 0.267286504       | -0.057285807         | 1                   |

**Supplementary Table S16. List of CGIs consistently identified among the 500 top-ranked, differentially methylated CGIs after induced overexpression of *TET1* and *TET* triple knockdown.**

This table is related to Fig. 3 comprising the overlap between the *TET1* overexpression and *TET* triple knockdown experiments. For CGIs overlapping with 2 kb promoter regions, corresponding promoter gene symbols are provided.

| CGI                       | promoter_overlap      | beta.TET1+Dox | beta.TET1-Dox | TET1_difference | TET1_num.sites | beta.GFP_siRNA | beta.GFP_scramble | knockdown_difference | knockdown_num.sites |
|---------------------------|-----------------------|---------------|---------------|-----------------|----------------|----------------|-------------------|----------------------|---------------------|
| chr1:10057122-10058108    | RBP7                  | 0.5325367     | 0.580391926   | -0.047855227    | 8              | 0.602307166    | 0.49394722        | 0.108359946          | 8                   |
| chr1:149605515-149605903  | RNVU1-20              | 0.239121685   | 0.350729923   | -0.111608239    | 1              | 0.361994384    | 0.160476523       | 0.201517861          | 1                   |
| chr1:39044060-39044561    |                       | 0.180064087   | 0.239891      | -0.059826914    | 5              | 0.294757431    | 0.163667907       | 0.131089524          | 5                   |
| chr1:54965024-54965391    |                       | 0.314038123   | 0.351845178   | -0.037807055    | 3              | 0.365940134    | 0.271343909       | 0.094596225          | 3                   |
| chr10:112431836-112432426 |                       | 0.183934701   | 0.272102573   | -0.088167872    | 7              | 0.361349464    | 0.180618597       | 0.180730867          | 7                   |
| chr10:118927022-118928132 | MIR3663               | 0.7116284     | 0.636355755   | 0.075272645     | 5              | 0.690615198    | 0.604906384       | 0.085708814          | 5                   |
| chr10:130339527-130339777 |                       | 0.6926802     | 0.768367089   | -0.075686889    | 5              | 0.791894202    | 0.64068077        | 0.151213432          | 5                   |
| chr10:13933483-13934184   |                       | 0.446689684   | 0.488664444   | -0.04197476     | 3              | 0.502073707    | 0.414891198       | 0.087182509          | 3                   |
| chr10:31422710-31423316   |                       | 0.417412862   | 0.541521967   | -0.124109105    | 3              | 0.518271273    | 0.398340639       | 0.119930634          | 3                   |
| chr11:47615711-47616055   | C1QTNF4               | 0.173370704   | 0.377760502   | -0.204389798    | 1              | 0.426409157    | 0.169088109       | 0.257321048          | 1                   |
| chr11:8009048-8009251     |                       | 0.27724872    | 0.318904734   | -0.041656014    | 2              | 0.372745771    | 0.271435333       | 0.101310438          | 2                   |
| chr12:54811982-54812202   |                       | 0.474306653   | 0.604253639   | -0.129946986    | 2              | 0.665139504    | 0.472591149       | 0.192548355          | 2                   |
| chr13:113540351-113540558 |                       | 0.496485109   | 0.576535828   | -0.080050719    | 4              | 0.603915751    | 0.461294119       | 0.142621632          | 4                   |
| chr13:28540357-28541279   |                       | 0.587370081   | 0.690818858   | -0.103448777    | 2              | 0.717871695    | 0.510745901       | 0.207125793          | 2                   |
| chr14:103557607-103558235 |                       | 0.430755547   | 0.396145234   | 0.034610314     | 4              | 0.446431761    | 0.353618747       | 0.092813014          | 4                   |
| chr14:24020003-24020251   |                       | 0.307096299   | 0.411948781   | -0.104852482    | 3              | 0.428334079    | 0.32065738        | 0.107676699          | 3                   |
| chr14:36977519-36977996   |                       | 0.420785667   | 0.475185753   | -0.054400087    | 4              | 0.505561781    | 0.373965057       | 0.131596724          | 4                   |
| chr16:31453944-31454561   | ZNF843                | 0.279924842   | 0.335812316   | -0.055887474    | 3              | 0.356568308    | 0.258135393       | 0.098432915          | 3                   |
| chr16:34407637-34407919   | SLC25A1P4             | 0.609801639   | 0.550155768   | 0.059645871     | 4              | 0.563682063    | 0.67108939        | -0.107407326         | 4                   |
| chr16:3493099-3493569     | NAA60;ZNF597          | 0.504377529   | 0.58435585    | -0.079978321    | 6              | 0.596386274    | 0.477308666       | 0.119077608          | 6                   |
| chr16:67208068-67208678   |                       | 0.31323473    | 0.435778555   | -0.122543825    | 3              | 0.398275108    | 0.322261287       | 0.076013821          | 3                   |
| chr19:42501262-42501486   | ATP1A3                | 0.135328605   | 0.193110878   | -0.057782272    | 2              | 0.244210877    | 0.109212808       | 0.134998069          | 2                   |
| chr2:79220193-79220592    |                       | 0.472360002   | 0.534480277   | -0.062120275    | 4              | 0.550802352    | 0.418936717       | 0.131865635          | 4                   |
| chr20:34652455-34653500   |                       | 0.377248889   | 0.414603303   | -0.037354415    | 4              | 0.465441932    | 0.350387702       | 0.11505423           | 4                   |
| chr20:62947649-62948464   |                       | 0.087877352   | 0.179149916   | -0.091272564    | 3              | 0.212269099    | 0.095676352       | 0.116592747          | 3                   |
| chr3:156008992-156009320  |                       | 0.536770326   | 0.594634848   | -0.057864521    | 3              | 0.585607852    | 0.49080211        | 0.094805742          | 3                   |
| chr3:158519510-158520329  |                       | 0.182128182   | 0.215574734   | -0.033446552    | 9              | 0.280878515    | 0.136227907       | 0.144650608          | 9                   |
| chr3:40518518-40518848    | ZNF619                | 0.118666293   | 0.186597408   | -0.067931115    | 5              | 0.266859094    | 0.119338042       | 0.147521052          | 5                   |
| chr3:72788073-72788416    |                       | 0.239107279   | 0.444377539   | -0.205270261    | 3              | 0.482021201    | 0.242749969       | 0.239271232          | 3                   |
| chr4:155547985-155548322  | LRAT                  | 0.289842796   | 0.39142277    | -0.101579974    | 5              | 0.418931194    | 0.239848867       | 0.179082327          | 5                   |
| chr4:3464800-3465440      | DOK7                  | 0.397006168   | 0.483601637   | -0.086595468    | 8              | 0.530252206    | 0.357766806       | 0.172485399          | 8                   |
| chr5:139076543-139077179  |                       | 0.202190646   | 0.297694396   | -0.09550375     | 5              | 0.324271483    | 0.20930927        | 0.114962213          | 5                   |
| chr5:41869664-41870876    | OXCT1;OXCT1-AS1       | 0.269529422   | 0.368284204   | -0.098754782    | 10             | 0.401641729    | 0.249222756       | 0.152418972          | 10                  |
| chr5:43000344-43000791    |                       | 0.714763345   | 0.799220772   | -0.084457428    | 4              | 0.820775416    | 0.667799179       | 0.152976237          | 4                   |
| chr6:13873766-13874262    |                       | 0.599314334   | 0.528079072   | 0.071235262     | 4              | 0.577867869    | 0.486168552       | 0.091699317          | 4                   |
| chr6:27833121-27833406    | HIST1H2AL;HIST1H2BPS2 | 0.491216466   | 0.587251818   | -0.096035352    | 4              | 0.57725782     | 0.482647606       | 0.094610214          | 4                   |
| chr7:121943868-121944538  | FEZF1-AS1             | 0.275117708   | 0.330646688   | -0.05552898     | 5              | 0.357081876    | 0.25918423        | 0.097897645          | 5                   |
| chr7:138666359-138666972  | KIAA1549              | 0.302695218   | 0.397387429   | -0.094692211    | 2              | 0.489669095    | 0.265051096       | 0.224618             | 2                   |
| chr7:948295-949168        |                       | 0.389289407   | 0.353540693   | 0.035748715     | 2              | 0.447678732    | 0.321163469       | 0.126515264          | 2                   |
| chr8:117950473-117950717  | AARD                  | 0.373144361   | 0.483931839   | -0.110787477    | 2              | 0.509981124    | 0.321085221       | 0.188895903          | 2                   |
| chr8:33456916-33457515    | DUSP26                | 0.460878488   | 0.559418338   | -0.098539849    | 6              | 0.559122479    | 0.440413866       | 0.118708613          | 6                   |
| chr8:97657175-97657943    | CPQ                   | 0.242506419   | 0.295110542   | -0.052604123    | 12             | 0.352082693    | 0.213228514       | 0.138854179          | 12                  |
| chr9:115708029-115708238  |                       | 0.673851354   | 0.595880727   | 0.077970627     | 1              | 0.678785934    | 0.533593633       | 0.1451923            | 1                   |
| chr9:129677707-129678009  |                       | 0.171626484   | 0.240156164   | -0.06852968     | 2              | 0.255044604    | 0.151094746       | 0.103949858          | 2                   |
| chr9:138156711-138156983  |                       | 0.882406975   | 0.726715518   | 0.155691457     | 1              | 0.701888519    | 0.856081342       | -0.154192823         | 1                   |
| chr9:29826527-29826736    |                       | 0.605175118   | 0.67490027    | -0.069725152    | 2              | 0.590302493    | 0.721791151       | -0.131488658         | 2                   |
| chr9:32572997-32573227    | NDUFB6                | 0.07266985    | 0.147935283   | -0.075265433    | 1              | 0.208203095    | 0.082953234       | 0.125249861          | 1                   |
| chr9:35111268-35111504    |                       | 0.149083957   | 0.216414274   | -0.067330317    | 1              | 0.264165589    | 0.146842162       | 0.117323427          | 1                   |
| chrX:152909014-152909214  |                       | 0.432842341   | 0.485460431   | -0.052618091    | 3              | 0.508496088    | 0.434281358       | 0.07421473           | 3                   |
| chrX:36975506-36976349    |                       | 0.527266645   | 0.603387952   | -0.076121307    | 4              | 0.630525776    | 0.54710624        | 0.083419536          | 4                   |
| chrY:14107138-14107480    |                       | 0.765878592   | 0.596333359   | 0.169545233     | 1              | 0.669797091    | 0.838528942       | -0.168731851         | 1                   |

**Supplementary Table S17. Statistical overrepresentation test of promoters, gene bodies and CGIs showing reciprocal methylation changes after *TET1* overexpression and *TET* triple knockdown.**  
 This table is related to **Fig. 3**. Promoters, gene bodies and CGIs with reciprocal methylation changes were analyzed using the PANTHER Overrepresentation Test with default settings.

Analysis Type: PANTHER Overrepresentation Test (release 20150430)  
 Annotation Version and Release Date: PANTHER version 10.0 Released 2015-05-15  
 Bonferroni correction for multiple testing  
 Annotation Data Set: PANTHER GO-Slim Biological Process

Reference List:  
 Homo sapiens (all genes in database)  
 Mapped IDs:  
 Unmapped IDs:

Reference list  
 20814  
 0

Displaying only results with P<0.05

**PANTHER GO-Slim Biological Process**

| Reciprocal methylation changes after <i>TET1</i> overexpression / <i>TET</i> triple knockdown |                                         |          |                 |     |         |                                           |          |                 |     |         |                                                              |          |                 |     |         |
|-----------------------------------------------------------------------------------------------|-----------------------------------------|----------|-----------------|-----|---------|-------------------------------------------|----------|-----------------|-----|---------|--------------------------------------------------------------|----------|-----------------|-----|---------|
| Homo sapiens (REF)                                                                            | 38 reciprocal promoters (30 mapped IDs) |          |                 |     |         | 26 reciprocal gene bodies (15 mapped IDs) |          |                 |     |         | 42 reciprocal CGIs (20 promoter associations, 15 mapped IDs) |          |                 |     |         |
| #                                                                                             | #                                       | expected | Fold Enrichment | +/- | P value | #                                         | expected | Fold Enrichment | +/- | P value | #                                                            | expected | Fold Enrichment | +/- | P value |

Supplementary Table S18. List of deregulated transcripts after induced overexpression of *TET1*.

| gene_symbol  | probe_set   | TET1_#1_fold_change | TET1_#1_change_p-value | TET1_#2_fold_change | TET1_#2_change_p-value | TET1_#3_fold_change | TET1_#3_change_p-value |
|--------------|-------------|---------------------|------------------------|---------------------|------------------------|---------------------|------------------------|
| ---          | 238571_at   | -1.41               | 0.999973               | -1.32               | 0.999759               | -1.32               | 0.998168               |
| ARRDC4       | 225283_at   | 1.15                | 0.000023               | 1.23                | 0.000035               | 1.23                | 0.000774               |
| ASMTL        | 36553_at    | 1.41                | 0.000005               | 1.41                | 0.000018               | 1.52                | 0.000004               |
| CDCA3        | 221436_s_at | 1.23                | 0.00002                | 1.32                | 0.000273               | 1.15                | 0.000214               |
| COPZ1        | 222386_s_at | 1.23                | 0.000214               | 1.32                | 0.00002                | 1.32                | 0.00004                |
| DUSP5P       | 1553299_at  | 1.23                | 0.001077               | 1.23                | 0.00013                | 1.23                | 0.00004                |
| FTL          | 212788_x_at | 1.15                | 0.00013                | 1.23                | 0.00002                | 1.23                | 0.000147               |
| FTL          | 213187_x_at | 1.15                | 0.001077               | 1.32                | 0.000147               | 1.32                | 0.000273               |
| GPC6         | 227059_at   | -1.23               | 0.999899               | -1.74               | 0.999948               | -1.32               | 0.999727               |
| HADHA        | 208629_s_at | -1.32               | 0.999811               | -1.32               | 0.99997                | -1.32               | 0.99997                |
| HOXA13       | 238808_at   | -1.32               | 0.999965               | -1.41               | 0.99998                | -1.41               | 0.99994                |
| HOXA13       | 231786_at   | -1.41               | 0.999922               | -1.41               | 0.999654               | -1.41               | 0.999759               |
| LAMA4        | 202202_s_at | -1.52               | 0.999562               | -1.41               | 0.999727               | -1.32               | 0.99965                |
| LGALS1       | 201105_at   | 1.62                | 0.000346               | 1.41                | 0.001651               | 1.41                | 0.000027               |
| LOC100506517 | 221589_s_at | 1.23                | 0.000552               | 1.23                | 0.000865               | 1.32                | 0.001201               |
| LPHN1        | 47560_at    | -1.23               | 0.998526               | -1.52               | 0.99996                | -1.41               | 0.99981                |
| MXD1         | 226275_at   | 1.32                | 0.001832               | 1.62                | 0.001077               | 1.52                | 0.001832               |
| PHF3         | 217951_s_at | -1.32               | 0.998923               | -1.41               | 0.99987                | -1.41               | 0.999833               |
| RAB27B       | 228708_at   | -1.74               | 0.99998                | -1.41               | 0.999034               | -1.52               | 0.999727               |
| SPEN         | 201996_s_at | -1.52               | 0.999922               | -1.62               | 0.99998                | -1.32               | 0.999886               |
| SUPT16H      | 233827_s_at | -1.52               | 0.999965               | -1.74               | 0.99998                | -1.41               | 0.99998                |
| TMTC3        | 1560017_at  | -1.32               | 0.999932               | -1.62               | 0.99998                | -1.41               | 0.999811               |
| TRAPPC6A     | 204985_s_at | 1.32                | 0.00004                | 1.32                | 0.001651               | 1.23                | 0.000273               |
| WIPI1        | 213836_s_at | 1.62                | 0.000023               | 1.32                | 0.000492               | 1.74                | 0.000389               |

Supplementary Table S19. List of deregulated transcripts after *TET* triple knockdown.

| gene_symbol             | probe_set    | GFP_#1_fold_change | GFP_#1_change_p-value | GFP_#2_fold_change | GFP_#2_change_p-value | GFP_#3_fold_change | GFP_#3_change_p-value |
|-------------------------|--------------|--------------------|-----------------------|--------------------|-----------------------|--------------------|-----------------------|
|                         | ---          | 1.87               | 0.00003               | 1.32               | 0.000214              | 1.74               | 0.000035              |
|                         | 232130_at    | 1.41               | 0.001832              | 1.32               | 0.000078              | 1.41               | 0.000618              |
|                         | 243023_at    | 1.32               | 0.000389              | 1.74               | 0.00002               | 1.52               | 0.00002               |
|                         | 228750_at    | -1.23              | 0.99998               | -1.23              | 0.99998               | -1.32              | 0.99998               |
|                         | 242787_at    | -1.32              | 0.999853              | -1.32              | 0.99998               | -1.41              | 0.99998               |
|                         | 226883_at    | -1.52              | 0.998799              | -1.52              | 0.999965              | -2.00              | 0.99998               |
|                         | 1560739_a_at | 1.32               | 0.00003               | 1.41               | 0.000552              | 1.52               | 0.00003               |
|                         | 238156_at    | -1.32              | 0.99965               | -1.32              | 0.999973              | -1.52              | 0.99998               |
|                         | 231576_at    | -3.03              | 0.99996               | -4.59              | 0.99994               | -3.73              | 0.99998               |
|                         | 214862_x_at  | 1.23               | 0.00002               | 1.23               | 0.000438              | 1.41               | 0.00002               |
|                         | 1554007_at   | -1.62              | 0.999977              | -1.62              | 0.998664              | -1.62              | 0.99998               |
| AACS                    | 218434_s_at  | -2.00              | 0.99998               | -1.87              | 0.99998               | -1.87              | 0.99998               |
| ACPL2                   | 226925_at    | 1.32               | 0.00002               | 1.41               | 0.000046              | 1.52               | 0.00002               |
| ADAM1                   | 228925_at    | -1.32              | 0.998514              | -1.15              | 0.998349              | -1.32              | 0.999448              |
| ADNP                    | 226426_at    | 1.23               | 0.00002               | 1.23               | 0.000027              | 1.52               | 0.000865              |
| AFG3L1P                 | 1552287_s_at | 1.23               | 0.000023              | 1.32               | 0.00002               | 1.23               | 0.000147              |
| AMMECR1                 | 204976_s_at  | -1.74              | 0.99998               | -1.87              | 0.99997               | -1.52              | 0.99998               |
| ANO6                    | 224906_at    | -1.23              | 0.999448              | -1.15              | 0.999654              | -1.41              | 0.99998               |
| ARRDC4                  | 225283_at    | -1.23              | 0.999654              | -1.32              | 0.999948              | -1.23              | 0.999811              |
| ATF3                    | 202672_s_at  | -1.52              | 0.999977              | -2.00              | 0.99998               | -1.52              | 0.99998               |
| ATP11A                  | 230875_s_at  | 1.23               | 0.000774              | 1.32               | 0.001832              | 1.41               | 0.001201              |
| ATP2B4                  | 212136_at    | -1.23              | 0.999977              | -1.32              | 0.99998               | -1.41              | 0.99998               |
| BAG2                    | 209406_at    | -1.23              | 0.999654              | -1.41              | 0.999973              | -1.32              | 0.99998               |
| BBX                     | 223135_s_at  | -1.32              | 0.999693              | -1.41              | 0.99998               | -1.32              | 0.999954              |
| BBX                     | 213016_at    | -1.32              | 0.999508              | -1.32              | 0.999853              | -1.41              | 0.99998               |
| BBX                     | 232008_s_at  | -1.32              | 0.999693              | -1.41              | 0.999977              | -1.62              | 0.99997               |
| BBX                     | 213015_at    | -1.41              | 0.999911              | -1.41              | 0.99998               | -1.52              | 0.99998               |
| BBX                     | 226331_at    | -1.23              | 0.998168              | -1.52              | 0.99998               | -1.62              | 0.99998               |
| BICD1                   | 1554020_at   | -1.41              | 0.99998               | -1.32              | 0.99998               | -1.52              | 0.99998               |
| BLMH                    | 202179_at    | -1.32              | 0.99998               | -1.32              | 0.99996               | -1.32              | 0.99998               |
| BRI3BP                  | 225716_at    | -1.62              | 0.99997               | -1.32              | 0.99998               | -1.41              | 0.99998               |
| BUB3                    | 201456_s_at  | -1.62              | 0.99987               | -1.41              | 0.99998               | -1.41              | 0.99998               |
| BUB3                    | 201458_s_at  | 1.52               | 0.000189              | 1.52               | 0.000088              | 1.41               | 0.000114              |
| C11orf70                | 224463_s_at  | -1.74              | 0.99998               | -1.23              | 0.99987               | -1.52              | 0.99998               |
| C11orf96                | 227099_s_at  | -1.62              | 0.999932              | -1.41              | 0.999899              | -1.74              | 0.999922              |
| C1orf122                | 225480_at    | 1.52               | 0.00002               | 1.41               | 0.001077              | 1.62               | 0.00002               |
| C1orf53                 | 1558508_a_at | 1.32               | 0.000966              | 1.74               | 0.001486              | 1.62               | 0.000438              |
| C1orf53                 | 1558507_at   | 1.52               | 0.000147              | 1.87               | 0.000078              | 1.87               | 0.00004               |
| C1orf63                 | 209006_s_at  | -1.52              | 0.998799              | -1.87              | 0.99994               | -1.52              | 0.99998               |
| C3orf80                 | 236738_at    | 1.23               | 0.001201              | 1.32               | 0.000307              | 1.23               | 0.000027              |
| C6orf228                | 227124_at    | 1.32               | 0.000023              | 1.32               | 0.001486              | 1.23               | 0.00002               |
| C7orf60                 | 228149_at    | 1.62               | 0.000101              | 1.62               | 0.00002               | 1.74               | 0.00004               |
| C8orf48                 | 236634_at    | -1.62              | 0.99965               | -1.52              | 0.999922              | -1.62              | 0.99998               |
| CCDC25                  | 222525_s_at  | -1.62              | 0.99998               | -1.87              | 0.999977              | -1.87              | 0.99997               |
| CCNB2                   | 202705_at    | -1.52              | 0.99998               | -1.41              | 0.99998               | -1.41              | 0.99998               |
| CCND2                   | 200953_s_at  | 1.15               | 0.001077              | 1.52               | 0.00013               | 1.52               | 0.000241              |
| CCNE2                   | 211814_s_at  | -1.23              | 0.998664              | -1.32              | 0.99996               | -1.32              | 0.99998               |
| CCNY                    | 224647_at    | -1.23              | 0.999886              | -1.32              | 0.999226              | -1.23              | 0.999977              |
| CD24                    | 209771_x_at  | -1.32              | 0.999727              | -1.32              | 0.999786              | -1.32              | 0.99998               |
| CD302 /// LY75-CD302    | 203799_at    | -1.32              | 0.999786              | -1.41              | 0.99998               | -1.41              | 0.99998               |
| CDK6                    | 224851_at    | -1.41              | 0.99998               | -1.41              | 0.999977              | -1.41              | 0.99998               |
| CDK6                    | 224847_at    | -1.23              | 0.99998               | -1.41              | 0.99997               | -1.32              | 0.99998               |
| CEBPG                   | 204203_at    | -1.41              | 0.999973              | -1.23              | 0.999382              | -1.41              | 0.99998               |
| CEBPG                   | 225527_at    | -1.52              | 0.99998               | -1.52              | 0.99998               | -1.41              | 0.99998               |
| CEP55                   | 218542_at    | -1.52              | 0.99986               | -1.62              | 0.99998               | -1.62              | 0.99986               |
| CLDND1                  | 1554149_at   | -1.74              | 0.99998               | -1.52              | 0.99998               | -1.52              | 0.99998               |
| CLDND1                  | 208925_at    | -1.41              | 0.99998               | -1.23              | 0.999562              | -1.23              | 0.99998               |
| CNOT7                   | 218250_s_at  | -1.41              | 0.99994               | -1.41              | 0.99998               | -1.52              | 0.99998               |
| CNOT7                   | 225053_at    | 1.32               | 0.000078              | 1.52               | 0.00002               | 1.41               | 0.00002               |
| COL2A1                  | 213492_at    | -1.32              | 0.999654              | -1.15              | 0.998514              | -1.32              | 0.999135              |
| CREB3L4                 | 226455_at    | 1.41               | 0.000273              | 1.32               | 0.000088              | 1.52               | 0.00013               |
| CREBZF                  | 202978_s_at  | -1.32              | 0.999654              | -1.74              | 0.99996               | -1.52              | 0.999308              |
| CUX1                    | 227069_at    | -1.41              | 0.999954              | -1.62              | 0.99994               | -1.62              | 0.99998               |
| CUX1                    | 225935_at    | -1.52              | 0.999948              | -1.52              | 0.99998               | -1.52              | 0.999911              |
| CUX1                    | 214743_at    | -1.52              | 0.999966              | -1.62              | 0.999996              | -1.74              | 0.999988              |
| CYLD                    | 39582_at     | -1.62              | 0.999833              | -1.52              | 0.999899              | -1.74              | 0.999899              |
| CYLD                    | 213295_at    | -1.41              | 0.998168              | -1.41              | 0.999899              | -1.41              | 0.99998               |
| DLL1                    | 224215_s_at  | 1.41               | 0.00002               | 1.52               | 0.00002               | 1.32               | 0.00002               |
| DPCD                    | 226009_at    | 1.41               | 0.00002               | 1.41               | 0.00002               | 1.23               | 0.00002               |
| DPCD                    | 1553976_a_at | -1.23              | 0.998799              | -1.32              | 0.999974              | -1.32              | 0.99998               |
| DSC2                    | 226817_at    | -1.52              | 0.999727              | -1.74              | 0.99987               | -1.62              | 0.999853              |
| DUSP7                   | 213848_at    | -1.52              | 0.999973              | -1.52              | 0.999932              | -1.62              | 0.999911              |
| EDEM1                   | 203279_at    | 1.32               | 0.000052              | 1.32               | 0.001486              | 1.41               | 0.00002               |
| EGR1                    | 201694_s_at  | 1.32               | 0.001651              | 1.74               | 0.000389              | 1.32               | 0.000307              |
| EIF2AK1                 | 217735_s_at  | -1.62              | 0.999948              | -1.87              | 0.999811              | -1.62              | 0.999899              |
| EIF4E2 /// LOC100507948 | 226734_at    | -1.52              | 0.99998               | -1.41              | 0.99998               | -1.32              | 0.999922              |
| ELK4                    | 225159_s_at  | -1.41              | 0.999899              | -1.32              | 0.99998               | -1.32              | 0.99998               |
| ENTPD4                  | 204076_at    | -1.23              | 0.999654              | -1.32              | 0.998514              | -1.52              | 0.99998               |
| EPB41L5                 | 225855_at    | 1.23               | 0.000307              | 1.23               | 0.000865              | 1.32               | 0.000023              |
| EPC2                    | 225838_at    | -2.46              | 0.998923              | -2.14              | 0.999727              | -2.00              | 0.999977              |
| ERBB3                   | 202454_s_at  | -2.46              | 0.999811              | -2.30              | 0.99998               | -2.14              | 0.99998               |
| ERBB3                   | 226213_at    | -1.41              | 0.999135              | -2.00              | 0.999965              | -1.62              | 0.99998               |
| ERGIC2                  | 240172_at    | -1.32              | 0.999693              | -1.52              | 0.99998               | -1.41              | 0.99998               |
| ERO1LB                  | 231944_at    | -1.32              | 0.999786              | -1.41              | 0.999973              | -1.41              | 0.998664              |
| FAM190B                 | 1554132_a_at | -1.52              | 0.99965               | -1.74              | 0.99998               | -1.52              | 0.99987               |
| FAM190B                 | 209379_s_at  | -1.32              | 0.999853              | -1.15              | 0.999226              | -1.41              | 0.99996               |
| FKBP4                   | 200894_s_at  | -1.62              | 0.99965               | -1.32              | 0.999911              | -1.62              | 0.999886              |
| FKBP4                   | 200895_s_at  | -1.41              | 0.999948              | -1.52              | 0.999973              | -1.32              | 0.99998               |
| FXR1                    | 230201_at    | -1.32              | 0.999833              | -1.32              | 0.99987               | -1.32              | 0.99987               |
| GABRB3                  | 227690_at    | -1.41              | 0.999727              | -1.23              | 0.999308              | -1.32              | 0.99997               |
| GOSR2                   | 243880_at    | -1.32              | 0.99987               | -1.41              | 0.999954              | -1.41              | 0.99998               |
| GUK1                    | 200075_s_at  | 1.62               | 0.00002               | 1.41               | 0.00013               | 1.74               | 0.00006               |
| HCFC2                   | 235264_at    | -1.23              | 0.99999               | -1.23              | 0.999954              | -1.32              | 1                     |
| HEY1                    | 44783_s_at   | 1.32               | 0.000035              | 1.41               | 0.000147              | 1.23               | 0.000618              |
| HIST1H3H                | 206110_at    | -1.41              | 0.999977              | -1.52              | 0.99996               | -1.74              | 0.99998               |
| HMGGB3                  | 225601_at    | 1.41               | 0.000027              | 1.62               | 0.000052              | 1.52               | 0.00004               |
| HNRNPA1                 | 222040_at    | 1.23               | 0.001651              | 1.52               | 0.00002               | 1.41               | 0.00002               |
| HNRNPA2B1               | 225107_at    | 1.15               | 0.001077              | 1.32               | 0.000346              | 1.41               | 0.000023              |
| HNRNPU-AS1              | 225786_at    | -1.23              | 0.998168              | -1.15              | 0.998799              | -1.32              | 0.999899              |
| HOK1                    | 225792_at    | 1.15               | 0.00006               | 1.32               | 0.000438              | 1.23               | 0.000492              |
| HOXA13                  | 238571_at    | 1.23               | 0.00002               | 1.32               | 0.00002               | 1.41               | 0.000023              |
| HOXA5                   | 213844_at    | -1.32              | 0.999727              | -1.32              | 0.99998               | -1.32              | 0.99998               |
| ID4                     | 209291_at    | -1.32              | 0.999948              | -1.41              | 0.99997               | -1.32              | 0.999034              |
| IFT81                   | 219372_at    | 1.74               | 0.00003               | 2.14               | 0.000046              | 2.30               | 0.000214              |
| IL8                     | 202859_x_at  | 1.62               | 0.00002               | 1.52               | 0.000865              | 1.74               | 0.00006               |
| ITGA8                   | 239092_at    | -1.52              | 0.999034              | -1.32              | 0.99997               | -1.52              | 0.999932              |
| JHDM1D                  | 221778_at    | -1.32              | 0.99994               | -1.52              | 0.99987               | -1.52              | 0.999922              |
| KBTBD2                  | 223584_s_at  | -1.41              | 0.999382              | -1.87              | 0.999911              | -1.62              | 0.999562              |
| KBTBD8                  | 239835_at    | -1.32              | 0.99987               | -1.23              | 0.998168              | -1.23              | 0.999948              |
| KIAA0020                | 203712_at    |                    |                       |                    |                       |                    |                       |

|                                        |              |       |          |       |          |       |          |
|----------------------------------------|--------------|-------|----------|-------|----------|-------|----------|
| KIAA0494                               | 201778_s_at  | -1.87 | 0.999759 | -1.62 | 0.999853 | -1.74 | 0.999759 |
| KIAA1704                               | 229891_x_at  | -1.23 | 0.998514 | -1.32 | 0.99998  | -1.41 | 0.99998  |
| KISS1R                                 | 242517_at    | -1.62 | 0.999973 | -1.32 | 0.999727 | -1.87 | 0.99996  |
| KLHL9                                  | 213233_s_at  | -1.23 | 0.999932 | -1.15 | 0.998349 | -1.15 | 0.998168 |
| KPNA5                                  | 229317_at    | -1.52 | 0.999508 | -1.74 | 0.99998  | -1.41 | 0.99996  |
| KPNA5                                  | 227934_at    | -1.62 | 0.999977 | -1.41 | 0.99998  | -1.52 | 0.99998  |
| KRT222                                 | 244111_at    | 1.52  | 0.00002  | 1.41  | 0.001486 | 2.00  | 0.000101 |
| LHFP                                   | 218656_s_at  | -1.87 | 0.99998  | -1.87 | 0.99998  | -2.14 | 0.99998  |
| LINC00094                              | 203245_s_at  | 1.23  | 0.000214 | 1.41  | 0.000774 | 1.23  | 0.000307 |
| LOC100652805 /// LOC100653302 /// PGK1 | 227068_at    | -1.41 | 0.999886 | -1.32 | 0.999973 | -1.32 | 0.999977 |
| LONRF3                                 | 242931_at    | -1.32 | 0.999693 | -1.32 | 0.99998  | -1.32 | 0.99998  |
| LPIN1                                  | 212274_at    | -1.23 | 0.999308 | -1.23 | 0.999508 | -1.41 | 0.999922 |
| LRIG1                                  | 211596_s_at  | -1.41 | 0.999833 | -1.41 | 0.998799 | -1.41 | 0.999911 |
| LRP8                                   | 228955_at    | -1.41 | 0.999965 | -1.62 | 0.99987  | -1.41 | 0.999811 |
| MAFB                                   | 218559_s_at  | -1.23 | 0.999911 | -1.32 | 0.999886 | -1.41 | 0.999786 |
| MAP3K7                                 | 206854_s_at  | -1.41 | 0.999727 | -1.62 | 0.99998  | -1.41 | 0.99998  |
| MAP3K7                                 | 206853_s_at  | -1.41 | 0.999853 | -1.41 | 0.999965 | -1.52 | 0.999977 |
| MAPK1                                  | 1552263_at   | -2.14 | 0.99998  | -2.64 | 0.99998  | -2.83 | 0.99998  |
| MGAT4A                                 | 226039_at    | -1.32 | 0.999693 | -1.23 | 0.999135 | -1.32 | 0.999759 |
| MICA                                   | 205904_at    | -1.41 | 0.99994  | -1.74 | 0.999932 | -1.74 | 0.999786 |
| MIR4680 /// PDCD4                      | 212594_at    | -1.32 | 0.999833 | -2.14 | 0.99998  | -2.00 | 0.999948 |
| MKI67                                  | 212022_s_at  | -1.32 | 0.99998  | -1.32 | 0.999948 | -1.32 | 0.999977 |
| MLLT4                                  | 224685_at    | -1.52 | 0.99998  | -1.52 | 0.99998  | -1.41 | 0.999965 |
| MNS1                                   | 219703_at    | 1.32  | 0.00004  | 1.41  | 0.000492 | 1.41  | 0.00003  |
| MORN2                                  | 226790_at    | 1.52  | 0.000023 | 1.41  | 0.00002  | 1.41  | 0.000035 |
| MTMR2                                  | 203211_s_at  | -1.41 | 0.99998  | -1.62 | 0.99998  | -1.41 | 0.99998  |
| MTMR2                                  | 214649_s_at  | -1.41 | 0.99998  | -1.41 | 0.999911 | -1.52 | 0.999973 |
| MTMR9                                  | 204837_at    | -1.74 | 0.99998  | -1.74 | 0.99997  | -1.74 | 0.99998  |
| MTMR9                                  | 213278_at    | -1.87 | 0.99998  | -1.62 | 0.999922 | -1.87 | 0.99998  |
| NACC2                                  | 212993_at    | 1.23  | 0.000046 | 1.32  | 0.000438 | 1.41  | 0.00002  |
| NAPEPLD                                | 226041_at    | 1.62  | 0.00002  | 1.32  | 0.000438 | 1.87  | 0.000078 |
| NDUFA8                                 | 218160_at    | -1.41 | 0.999973 | -1.23 | 0.999811 | -1.41 | 0.99998  |
| NFATC2IP                               | 212808_at    | -1.41 | 0.999973 | -1.52 | 0.999308 | -1.32 | 0.99994  |
| NFATC2IP                               | 217527_s_at  | -1.41 | 0.99997  | -1.52 | 0.99998  | -1.41 | 0.999973 |
| NFATC2IP                               | 229235_at    | -1.52 | 0.999899 | -1.87 | 0.99998  | -1.41 | 0.99998  |
| NFATC2IP                               | 217526_at    | -1.62 | 0.99997  | -1.41 | 0.99997  | -1.41 | 0.999833 |
| NHLRC3                                 | 227040_at    | -1.41 | 0.999833 | -1.62 | 0.999922 | -1.23 | 0.999135 |
| NKAIN2                                 | 242002_at    | 1.74  | 0.00002  | 1.87  | 0.000046 | 1.52  | 0.00013  |
| NPTX2                                  | 213479_at    | -1.32 | 0.999833 | -1.41 | 0.999911 | -1.62 | 0.999899 |
| NTS                                    | 206291_at    | 1.23  | 0.000241 | 1.62  | 0.000114 | 1.74  | 0.000114 |
| NUSAP1                                 | 218039_at    | -1.41 | 0.99998  | -1.32 | 0.99998  | -1.32 | 0.99998  |
| NUSAP1                                 | 219978_s_at  | -1.52 | 0.99998  | -1.15 | 0.999899 | -1.32 | 0.99998  |
| OCLN                                   | 231022_at    | 1.41  | 0.000114 | 1.41  | 0.000147 | 1.32  | 0.000307 |
| ORC4                                   | 203351_s_at  | -1.52 | 0.99997  | -1.41 | 0.99998  | -1.52 | 0.99998  |
| PAFAH1B2                               | 224777_s_at  | -1.32 | 0.999954 | -1.23 | 0.999973 | -1.32 | 0.99998  |
| PCDH7                                  | 228640_at    | 1.32  | 0.00002  | 1.32  | 0.000088 | 1.23  | 0.00002  |
| PKD3                                   | 228959_at    | -1.41 | 0.999562 | -1.23 | 0.998923 | -1.32 | 0.999948 |
| PGGT1B                                 | 235615_at    | -1.52 | 0.999922 | -1.52 | 0.99998  | -1.52 | 0.99998  |
| PGM2L1                                 | 229256_at    | 1.32  | 0.000023 | 1.52  | 0.000114 | 1.62  | 0.00002  |
| PGM2L1                                 | 229553_at    | 1.23  | 0.000052 | 1.32  | 0.000865 | 1.52  | 0.00002  |
| PHLPP2                                 | 213407_at    | -1.41 | 0.999922 | -1.41 | 0.999973 | -1.32 | 0.99997  |
| PIGV                                   | 51146_at     | -1.32 | 0.99978  | -1.23 | 0.999969 | -1.32 | 0.999765 |
| PPP2R2A                                | 228013_at    | -1.32 | 0.99998  | -1.32 | 0.999965 | -1.41 | 0.99998  |
| PPP2R2C                                | 228010_at    | -1.32 | 0.999977 | -1.32 | 0.999911 | -1.32 | 0.99998  |
| PRKACB                                 | 202741_at    | 1.15  | 0.001486 | 1.32  | 0.000692 | 1.15  | 0.000273 |
| PRKAG2                                 | 218292_s_at  | -1.52 | 0.999973 | -1.23 | 0.998514 | -1.41 | 0.999948 |
| PRRX1                                  | 238852_at    | 1.62  | 0.00002  | 1.52  | 0.000966 | 1.74  | 0.000307 |
| PSMA5                                  | 230300_at    | 1.52  | 0.00002  | 1.32  | 0.000189 | 1.52  | 0.00002  |
| PSMG1                                  | 203405_at    | -1.52 | 0.999965 | -1.52 | 0.99998  | -1.41 | 0.99997  |
| PTPRZ1                                 | 204469_at    | 1.74  | 0.001336 | 1.62  | 0.000189 | 1.74  | 0.000088 |
| RAB11FIP4                              | 225739_at    | -1.32 | 0.999508 | -1.41 | 0.999654 | -1.74 | 0.999786 |
| RAB27A                                 | 222294_s_at  | -1.32 | 0.998168 | -1.41 | 0.999654 | -1.62 | 0.998923 |
| RAB39B                                 | 238695_s_at  | 1.52  | 0.00003  | 1.32  | 0.000552 | 1.41  | 0.000438 |
| RAI2                                   | 219440_at    | 1.52  | 0.00002  | 2.00  | 0.00002  | 2.14  | 0.00002  |
| RASEF                                  | 1553185_at   | 1.52  | 0.000027 | 1.32  | 0.001201 | 1.62  | 0.00006  |
| RASEF                                  | 1553186_x_at | 1.41  | 0.000046 | 1.41  | 0.000273 | 1.62  | 0.00002  |
| RBFOX2                                 | 212104_s_at  | -1.41 | 0.999759 | -1.32 | 0.999977 | -1.52 | 0.99998  |
| RBFOX2                                 | 216215_s_at  | -1.52 | 0.999973 | -1.32 | 0.999562 | -1.32 | 0.999886 |
| REEP3                                  | 225785_at    | -1.52 | 0.99987  | -1.87 | 0.99998  | -1.32 | 0.99996  |
| REXO4                                  | 218767_at    | -1.52 | 0.99998  | -1.41 | 0.999977 | -1.74 | 0.99998  |
| RG52                                   | 202388_at    | 1.32  | 0.000088 | 1.41  | 0.000147 | 1.41  | 0.000027 |
| RLIM                                   | 225416_at    | -1.41 | 0.999693 | -1.32 | 0.999932 | -1.32 | 0.99998  |
| ROBO1                                  | 213194_at    | 1.32  | 0.00002  | 1.41  | 0.000692 | 1.52  | 0.00002  |
| RPN2                                   | 213399_x_at  | -1.62 | 0.99998  | -1.41 | 0.99998  | -1.62 | 0.99998  |
| RPN2                                   | 213491_x_at  | -1.62 | 0.99998  | -1.41 | 0.99998  | -1.62 | 0.99998  |
| RPN2                                   | 208689_s_at  | -1.74 | 0.99998  | -1.52 | 0.99998  | -1.62 | 0.99998  |
| RPS6KB1                                | 226660_at    | -1.52 | 0.99996  | -1.32 | 0.99998  | -1.41 | 0.99998  |
| RTN1                                   | 203485_at    | 1.41  | 0.00002  | 1.41  | 0.000307 | 1.74  | 0.00003  |
| SAMHD1                                 | 234987_at    | 1.23  | 0.00003  | 1.32  | 0.000273 | 1.41  | 0.00002  |
| SEPP1                                  | 201427_s_at  | 1.62  | 0.000023 | 2.14  | 0.00002  | 2.00  | 0.00002  |
| SESTD1                                 | 226763_at    | -1.32 | 0.998799 | -1.15 | 0.998923 | -1.32 | 0.999786 |
| SLC30A5                                | 218989_x_at  | -1.52 | 0.999693 | -1.52 | 0.99998  | -1.32 | 0.99998  |
| SLC33A1                                | 203164_at    | -1.32 | 0.99997  | -1.32 | 0.99987  | -1.32 | 0.999886 |
| SLC44A5                                | 1569112_at   | 1.23  | 0.000438 | 1.52  | 0.00006  | 1.32  | 0.000147 |
| SNX12                                  | 224684_at    | 1.32  | 0.000046 | 1.62  | 0.000052 | 1.52  | 0.000027 |
| SNX5                                   | 217792_at    | -1.32 | 0.999922 | -1.15 | 0.998168 | -1.23 | 0.999226 |
| SORBS2                                 | 225728_at    | 1.41  | 0.001336 | 1.41  | 0.000389 | 1.41  | 0.000088 |
| SPTBN1                                 | 226342_at    | -1.32 | 0.999922 | -1.41 | 0.999226 | -1.23 | 0.998664 |
| SPTSSA                                 | 212460_at    | -1.52 | 0.999811 | -1.87 | 0.99998  | -1.62 | 0.99998  |
| SPTSSA                                 | 213508_at    | -1.62 | 0.99998  | -1.74 | 0.99998  | -2.14 | 0.99998  |
| SRPK2                                  | 1558254_s_at | -1.32 | 0.99994  | -1.23 | 0.999226 | -1.32 | 0.999922 |
| SRPK2                                  | 203182_s_at  | -1.32 | 0.999899 | -1.32 | 0.99998  | -1.32 | 0.999886 |
| STK40                                  | 223852_s_at  | -1.32 | 0.999886 | -1.62 | 0.998168 | -1.74 | 0.999226 |
| SUDS3                                  | 233841_s_at  | -1.62 | 0.99998  | -1.41 | 0.999508 | -1.23 | 0.999382 |
| SUMO3                                  | 200740_s_at  | 1.15  | 0.000114 | 1.32  | 0.000214 | 1.23  | 0.000023 |
| SYNRG                                  | 222715_s_at  | -1.23 | 0.999811 | -1.23 | 0.999135 | -1.32 | 0.999034 |
| SYNRG                                  | 221937_at    | -1.52 | 0.999611 | -1.32 | 0.999693 | -1.32 | 0.999911 |
| SYNRG                                  | 64418_at     | -1.52 | 0.999963 | -1.41 | 0.999932 | -1.32 | 0.999982 |
| TBCEL                                  | 227395_at    | -1.87 | 0.99998  | -1.74 | 0.999932 | -1.74 | 0.999977 |
| THRB                                   | 228716_at    | 1.32  | 0.000241 | 1.23  | 0.001832 | 1.23  | 0.000068 |
| TIPRL                                  | 214773_x_at  | -1.41 | 0.99998  | -1.41 | 0.99998  | -1.23 | 0.99998  |
| TM7SF2                                 | 210130_s_at  | 1.32  | 0.000346 | 1.62  | 0.001077 | 1.32  | 0.001077 |
| TMEFF2                                 | 223557_s_at  | 1.74  | 0.000692 | 1.32  | 0.000214 | 1.74  | 0.00003  |
| TMEM17                                 | 1557137_at   | 1.32  | 0.000167 | 1.52  | 0.000618 | 1.32  | 0.001832 |
| TMEM64                                 | 225972_at    | -1.62 | 0.99998  | -1.74 | 0.99998  | -1.62 | 0.999727 |
| TMEM66                                 | 200847_s_at  | -1.23 | 0.999034 | -1.32 | 0.999786 | -1.15 | 0.999226 |
| TMF1                                   | 214948_s_at  | -1.32 | 0.999786 | -1.23 | 0.999886 | -1.23 | 0.999965 |
| TNRC6B                                 | 229036_at    | 1.52  | 0.000552 | 1.41  | 0.001651 | 1.23  | 0.00006  |
| TP53I3                                 | 210609_s_at  | 1.41  | 0.000389 | 1.87  | 0.000035 | 1.87  | 0.000147 |
| TRIB3                                  | 218145_at    | -1.52 | 0.999922 | -1.41 | 0.999886 | -1.62 | 0.99998  |
| TSEN15                                 | 225399_at    | -1.15 | 0.998923 | -1.23 | 0.999382 | -1.23 | 0.999932 |
| TSPAN2                                 | 227236_at    | 2.00  | 0.000214 | 2.83  | 0.000214 | 2.14  | 0.000078 |

|         |              |       |          |       |          |       |          |
|---------|--------------|-------|----------|-------|----------|-------|----------|
| TSPYL4  | 212928_at    | 1.52  | 0.00002  | 1.62  | 0.000618 | 1.74  | 0.00002  |
| TTC30A  | 213679_at    | 1.32  | 0.001832 | 1.62  | 0.000167 | 1.74  | 0.000023 |
| UBE2QL1 | 226612_at    | -1.52 | 0.99998  | -1.32 | 0.999448 | -1.62 | 0.99998  |
| UBE3C   | 201817_at    | -1.52 | 0.999693 | -1.62 | 0.99998  | -1.62 | 0.99998  |
| UCP2    | 208998_at    | 1.23  | 0.001832 | 1.32  | 0.00006  | 1.23  | 0.00002  |
| UGT8    | 228956_at    | -1.23 | 0.998168 | -1.32 | 0.99998  | -1.23 | 0.999727 |
| USP36   | 220370_s_at  | -1.32 | 0.999308 | -1.23 | 0.998799 | -1.32 | 0.999973 |
| VCAN    | 211571_s_at  | 1.32  | 0.000346 | 1.32  | 0.001651 | 1.41  | 0.00002  |
| VCAN    | 204620_s_at  | 1.23  | 0.00004  | 1.32  | 0.000618 | 1.32  | 0.00002  |
| VTA1    | 224437_s_at  | -1.74 | 0.99997  | -1.74 | 0.99998  | -1.52 | 0.99998  |
| VTA1    | 223022_s_at  | -1.74 | 0.99998  | -1.41 | 0.999977 | -1.62 | 0.99998  |
| VTA1    | 223021_x_at  | -2.00 | 0.99998  | -1.62 | 0.99998  | -1.74 | 0.99998  |
| VTI1B   | 225926_at    | -1.32 | 0.99994  | -1.52 | 0.999786 | -1.52 | 0.99987  |
| VTI1B   | 225928_at    | -1.41 | 0.999611 | -1.41 | 0.999899 | -1.62 | 0.999786 |
| WDR46   | 209196_at    | -1.41 | 0.999382 | -1.52 | 0.999922 | -1.87 | 0.999932 |
| WDR67   | 1556429_a_at | -1.62 | 0.999977 | -1.32 | 0.999759 | -1.62 | 0.99996  |
| WDR90   | 227894_at    | 1.32  | 0.000052 | 1.32  | 0.001651 | 1.23  | 0.000692 |
| ZBTB4   | 225629_s_at  | 1.32  | 0.000389 | 1.23  | 0.000774 | 1.41  | 0.000052 |
| ZDHC2   | 222731_at    | -1.32 | 0.999611 | -1.62 | 0.99998  | -1.32 | 0.999973 |
| ZDHC6   | 218249_at    | 1.15  | 0.000774 | 1.32  | 0.000692 | 1.41  | 0.00002  |
| ZFAND1  | 218919_at    | -1.41 | 0.999833 | -1.41 | 0.999977 | -1.52 | 0.99998  |
| ZNF678  | 242923_at    | -1.62 | 0.99998  | -1.74 | 0.99998  | -1.62 | 0.99998  |
| ZNF678  | 232028_at    | -1.74 | 0.999977 | -1.52 | 0.999977 | -1.52 | 0.99998  |
| ZNF678  | 230534_at    | -2.14 | 0.99998  | -1.74 | 0.99998  | -2.14 | 0.99998  |

**Supplementary Table S20. Statistical overrepresentation test of deregulated genes after *TET1* overexpression and *TET* triple knockdown.**

Deregulated genes were analyzed using the PANTHER Overrepresentation Test with default settings.

Analysis Type: PANTHER Overrepresentation Test (release 20150430)  
 Annotation Version and Release Date: PANTHER version 10.0 Released 2015-05-15  
 Bonferroni correction for multiple testing  
 Annotation Data Set: PANTHER GO-Slim Biological Process

Reference List:  
 Homo sapiens (all genes in database)

Reference list  
 20814  
 0

Mapped IDs:  
 Unmapped IDs:

Displaying only results with P<0.05

**PANTHER GO-Slim Biological Process**

|                    | <i>TET1</i> overexpression             | <i>TET</i> triple knockdown            |
|--------------------|----------------------------------------|----------------------------------------|
| Homo sapiens (REF) | 21 deregulated genes (19 mapped IDs)   | 191 deregulated genes (179 mapped IDs) |
| #                  | # expected Fold Enrichment +/- P value | # expected Fold Enrichment +/- P value |



**Supplementary Table S21. List of the top 500 *de novo* 5hmC-gaining promoters after induced overexpression of *TET1* .**

These promoters did not show any 5hmC reads above the threshold of 5 reads per 5hmC site in uninduced control cells but showed increased 5hmC levels after induced overexpression of *TET1* . Read numbers above the threshold were accumulated per promoter region.

| gene_symbol | RRHP_+Dox_reads | RRHP_5hmC_sites | rank |
|-------------|-----------------|-----------------|------|
| MIR4750     | 167             | 9               | 1    |
| FBXL22      | 156.5           | 7               | 2    |
| MATN2       | 155             | 9               | 3    |
| HSBP1L1     | 141             | 9               | 4    |
| SEPT5       | 139.5           | 11              | 5    |
| LRP8        | 139             | 9               | 6    |
| RPL13A      | 138.5           | 5               | 7    |
| LBX2        | 138             | 12              | 8    |
| CBLC        | 137             | 11              | 9    |
| CYBA        | 131             | 8               | 10   |
| RSPH6A      | 130.5           | 10              | 11   |
| ARHGEF1     | 128             | 13              | 12   |
| GRIN2D      | 127             | 6               | 13   |
| DNASE1L2    | 126             | 9               | 14   |
| SH2D6       | 125.5           | 6               | 15   |
| ANKRD33     | 121             | 6               | 16   |
| ABTB1       | 120             | 9               | 17   |
| SH2B2       | 120             | 7               | 18   |
| WDR86-AS1   | 119.5           | 8               | 19   |
| FOXE1       | 119             | 11              | 20   |
| COMP        | 118             | 10              | 21   |
| PNPLA5      | 117.5           | 7               | 22   |
| FAM166B     | 115.5           | 8               | 23   |
| SPATA2L     | 115.5           | 6               | 24   |
| ADCY2       | 114.5           | 10              | 25   |
| ONECUT1     | 113             | 11              | 26   |
| POLR2G      | 112.5           | 7               | 27   |
| TBC1D10C    | 109.5           | 9               | 28   |
| TSPAN18     | 108.5           | 6               | 29   |
| NR2E1       | 107.5           | 6               | 30   |
| PARVA       | 107             | 3               | 31   |
| TOP2A       | 107             | 6               | 32   |
| FUT2        | 105.5           | 5               | 33   |
| HMGB2P1     | 105.5           | 4               | 34   |
| TNFRSF25    | 105             | 7               | 35   |
| NPR2        | 104.5           | 9               | 36   |
| DNM1L       | 103.5           | 6               | 37   |
| DRD4        | 103.5           | 8               | 38   |
| NGFR        | 103.5           | 5               | 39   |
| PICK1       | 103             | 7               | 40   |
| DRD1        | 102.5           | 8               | 41   |
| ELFN2       | 101             | 5               | 42   |

|            |      |    |    |
|------------|------|----|----|
| JPH3       | 101  | 5  | 43 |
| DEF8       | 100  | 6  | 44 |
| JRK        | 100  | 9  | 45 |
| GATA5      | 99.5 | 9  | 46 |
| ITGB4      | 99.5 | 7  | 47 |
| TMEM8C     | 99   | 7  | 48 |
| DTX1       | 98.5 | 10 | 49 |
| KLHL35     | 98.5 | 8  | 50 |
| SHISA5     | 98.5 | 5  | 51 |
| CHST13     | 98   | 7  | 52 |
| PVRL1      | 98   | 6  | 53 |
| SNX4       | 96.5 | 7  | 54 |
| TFDP1      | 96.5 | 10 | 55 |
| GPR132     | 96   | 6  | 56 |
| DNAH3      | 95   | 4  | 57 |
| SNORD23    | 95   | 8  | 58 |
| ABHD15     | 94   | 8  | 59 |
| CDKN1C     | 94   | 5  | 60 |
| ELANE      | 94   | 12 | 61 |
| GPER       | 94   | 7  | 62 |
| CYP2T3P    | 92.5 | 5  | 63 |
| FAM27E2    | 92.5 | 6  | 64 |
| ZG16B      | 92.5 | 8  | 65 |
| MCF2L      | 91.5 | 5  | 66 |
| ELF4       | 91   | 5  | 67 |
| METTL21A   | 90   | 7  | 68 |
| PEBP1P1    | 90   | 5  | 69 |
| THEG       | 90   | 7  | 70 |
| GNPTG      | 89.5 | 7  | 71 |
| MTND5P2    | 89.5 | 9  | 72 |
| TUBGCP5    | 89.5 | 6  | 73 |
| FAM49B     | 89   | 5  | 74 |
| MRGPRG-AS1 | 88.5 | 5  | 75 |
| MYCNOS     | 88.5 | 6  | 76 |
| NKX2-2     | 88   | 8  | 77 |
| B3GNT9     | 87.5 | 8  | 78 |
| CYS1       | 87.5 | 7  | 79 |
| CEBPB      | 87   | 4  | 80 |
| TTC34      | 87   | 8  | 81 |
| GBX2       | 86.5 | 8  | 82 |
| KRTAP2-1   | 86.5 | 9  | 83 |
| PYGM       | 86.5 | 6  | 84 |
| C1orf94    | 85.5 | 6  | 85 |
| SPINT1     | 85.5 | 5  | 86 |
| TRA2A      | 85.5 | 5  | 87 |
| KL         | 85   | 6  | 88 |
| LINC00955  | 85   | 7  | 89 |
| TMEM180    | 85   | 3  | 90 |
| PCAT7      | 84.5 | 7  | 91 |
| TOMM6      | 84   | 4  | 92 |

|           |      |    |     |
|-----------|------|----|-----|
| CYP20A1   | 83.5 | 6  | 93  |
| CA9       | 83   | 4  | 94  |
| PRKCG     | 83   | 4  | 95  |
| RAPGEF4   | 83   | 4  | 96  |
| MFSD4     | 82.5 | 8  | 97  |
| RBBP8NL   | 82.5 | 4  | 98  |
| USP7      | 82.5 | 6  | 99  |
| SPON2     | 82   | 8  | 100 |
| ZNF879    | 82   | 5  | 101 |
| CELF4     | 81.5 | 3  | 102 |
| DUOX1     | 81.5 | 11 | 103 |
| MYH11     | 81.5 | 6  | 104 |
| ESRP1     | 81   | 10 | 105 |
| MYOD1     | 81   | 7  | 106 |
| SOX1      | 81   | 8  | 107 |
| GMPPA     | 80.5 | 6  | 108 |
| ACAN      | 80   | 7  | 109 |
| C21orf88  | 80   | 4  | 110 |
| CETP      | 80   | 6  | 111 |
| NECAB1    | 80   | 5  | 112 |
| RDH8      | 80   | 4  | 113 |
| SV2A      | 80   | 2  | 114 |
| FRMD4B    | 79.5 | 3  | 115 |
| AOX1      | 79   | 5  | 116 |
| IHH       | 79   | 8  | 117 |
| SLC52A2   | 79   | 5  | 118 |
| MARCH8    | 78.5 | 3  | 119 |
| PREX1     | 78.5 | 5  | 120 |
| MIR3615   | 78   | 5  | 121 |
| ARFRP1    | 77.5 | 3  | 122 |
| C11orf24  | 77   | 4  | 123 |
| MYPOP     | 77   | 5  | 124 |
| NEURL3    | 77   | 7  | 125 |
| NEK6      | 76   | 3  | 126 |
| ARX       | 75.5 | 6  | 127 |
| CHP2      | 75.5 | 5  | 128 |
| LINC00839 | 75.5 | 6  | 129 |
| VWA2      | 75.5 | 5  | 130 |
| ZFP90     | 75.5 | 5  | 131 |
| CACNG5    | 75   | 5  | 132 |
| GLB1L2    | 75   | 3  | 133 |
| SIGLEC11  | 75   | 6  | 134 |
| FZD9      | 74.5 | 6  | 135 |
| GLUD2     | 74.5 | 6  | 136 |
| HES6      | 74.5 | 4  | 137 |
| NDRG4     | 74.5 | 2  | 138 |
| NPAS3     | 74.5 | 5  | 139 |
| TUSC2     | 74.5 | 4  | 140 |
| C1orf127  | 74   | 5  | 141 |
| OTOF      | 74   | 7  | 142 |

|            |      |   |     |
|------------|------|---|-----|
| CARNS1     | 73.5 | 4 | 143 |
| SCRN1      | 73   | 3 | 144 |
| C1orf210   | 72.5 | 6 | 145 |
| COL26A1    | 72.5 | 5 | 146 |
| FBXL20     | 72.5 | 6 | 147 |
| KCNG2      | 72.5 | 6 | 148 |
| NDUFA3     | 72.5 | 7 | 149 |
| PAPSS1     | 72.5 | 3 | 150 |
| TNFRSF4    | 72.5 | 6 | 151 |
| TOX3       | 72.5 | 4 | 152 |
| GAPDHP24   | 72   | 7 | 153 |
| WNT7A      | 72   | 2 | 154 |
| CHRNA4     | 71.5 | 7 | 155 |
| EDN2       | 71.5 | 3 | 156 |
| ZNF205-AS1 | 71.5 | 6 | 157 |
| CLCN7      | 71   | 7 | 158 |
| CLDND2     | 71   | 5 | 159 |
| HCG4P3     | 71   | 5 | 160 |
| LRRC14     | 71   | 4 | 161 |
| MIR328     | 71   | 6 | 162 |
| MXD4       | 71   | 4 | 163 |
| SRP68P2    | 71   | 4 | 164 |
| STAB1      | 71   | 6 | 165 |
| KCNG1      | 70.5 | 7 | 166 |
| MEGF6      | 70.5 | 4 | 167 |
| MYO5A      | 70.5 | 5 | 168 |
| P2RY11     | 70.5 | 6 | 169 |
| RN7SL219P  | 70.5 | 6 | 170 |
| RNU6-96P   | 70.5 | 8 | 171 |
| TADA2B     | 70.5 | 3 | 172 |
| TMSB15A    | 70.5 | 4 | 173 |
| ZNF611     | 70.5 | 4 | 174 |
| CHRND      | 70   | 5 | 175 |
| DNM1P51    | 70   | 7 | 176 |
| FLRT1      | 70   | 5 | 177 |
| LINC00453  | 70   | 6 | 178 |
| GTF2IRD2B  | 69.5 | 5 | 179 |
| MIR298     | 69.5 | 6 | 180 |
| NAV1       | 69.5 | 8 | 181 |
| SMARCA4    | 69.5 | 6 | 182 |
| TDRD9      | 69.5 | 7 | 183 |
| CACNA1H    | 69   | 5 | 184 |
| NXPH2      | 69   | 4 | 185 |
| PKNOX2     | 69   | 2 | 186 |
| TLX2       | 69   | 6 | 187 |
| ARHGEF4    | 68.5 | 7 | 188 |
| CD8BP      | 68.5 | 7 | 189 |
| EEF1B2     | 68.5 | 4 | 190 |
| RNU4-52P   | 68.5 | 7 | 191 |
| ACER2      | 68   | 6 | 192 |

|               |      |   |     |
|---------------|------|---|-----|
| ALS2CL        | 68   | 5 | 193 |
| AUP1          | 68   | 2 | 194 |
| GJB2          | 68   | 4 | 195 |
| PSMC6         | 68   | 5 | 196 |
| ZFYVE26       | 68   | 5 | 197 |
| ANKDD1A       | 67.5 | 2 | 198 |
| C20orf166-AS1 | 67.5 | 5 | 199 |
| GSTTP2        | 67   | 3 | 200 |
| KRT78         | 67   | 4 | 201 |
| PARD6B        | 67   | 4 | 202 |
| TOMM20L       | 67   | 2 | 203 |
| GALNT18       | 66.5 | 3 | 204 |
| NPC1L1        | 66.5 | 4 | 205 |
| PLEKHB1       | 66.5 | 3 | 206 |
| QPR1          | 66.5 | 7 | 207 |
| CAMSAP3       | 66   | 3 | 208 |
| CFDP1         | 66   | 4 | 209 |
| CRABP1        | 66   | 7 | 210 |
| EIF4G1        | 66   | 6 | 211 |
| HMX1          | 66   | 8 | 212 |
| PGP           | 66   | 4 | 213 |
| PRTFDC1       | 66   | 6 | 214 |
| RSPH10B2      | 66   | 7 | 215 |
| VPS29         | 66   | 4 | 216 |
| YIF1A         | 66   | 7 | 217 |
| CHD5          | 65.5 | 5 | 218 |
| EDAR          | 65.5 | 5 | 219 |
| FOXK1         | 65.5 | 7 | 220 |
| MIR625        | 65.5 | 6 | 221 |
| MUC12         | 65.5 | 4 | 222 |
| PLIN4         | 65.5 | 7 | 223 |
| DOCK8         | 65   | 5 | 224 |
| LYPD2         | 65   | 6 | 225 |
| NT5DC2        | 65   | 4 | 226 |
| SHISA9        | 65   | 4 | 227 |
| WFDC2         | 65   | 8 | 228 |
| BBS10         | 64.5 | 4 | 229 |
| DHODH         | 64.5 | 4 | 230 |
| RRN3P1        | 64.5 | 4 | 231 |
| SIGLEC10      | 64.5 | 4 | 232 |
| TMED4         | 64.5 | 3 | 233 |
| CASC4P1       | 64   | 5 | 234 |
| CCDC11        | 64   | 2 | 235 |
| COL4A5        | 64   | 7 | 236 |
| MAT1A         | 64   | 2 | 237 |
| MLST8         | 64   | 4 | 238 |
| PGAP1         | 64   | 5 | 239 |
| SNRPD1        | 64   | 7 | 240 |
| ST14          | 64   | 6 | 241 |
| ABLIM2        | 63.5 | 5 | 242 |

|             |      |   |     |
|-------------|------|---|-----|
| B4GALT1     | 63.5 | 4 | 243 |
| ESPNL       | 63.5 | 5 | 244 |
| GREM1       | 63.5 | 7 | 245 |
| MAP2K3      | 63.5 | 5 | 246 |
| RNU6-51P    | 63.5 | 6 | 247 |
| SCFD1       | 63.5 | 5 | 248 |
| AHTA2       | 63   | 3 | 249 |
| CNFN        | 63   | 5 | 250 |
| IKBKE       | 63   | 4 | 251 |
| MAP1LC3B2   | 63   | 4 | 252 |
| NOTO        | 63   | 5 | 253 |
| SNORA27     | 63   | 5 | 254 |
| RPS2P52     | 62.5 | 8 | 255 |
| ST8SIA6     | 62.5 | 5 | 256 |
| KCNA4       | 62   | 4 | 257 |
| NKX6-2      | 62   | 5 | 258 |
| NPFFR1      | 62   | 6 | 259 |
| PSMD2       | 62   | 3 | 260 |
| RN7SL40P    | 62   | 6 | 261 |
| ARHGEF16    | 61.5 | 4 | 262 |
| ENDOG       | 61.5 | 6 | 263 |
| TAGAP       | 61.5 | 4 | 264 |
| CCDC74B-AS1 | 61   | 6 | 265 |
| F3          | 61   | 4 | 266 |
| FGF4        | 61   | 8 | 267 |
| FKBP6       | 61   | 5 | 268 |
| ITIH3       | 61   | 4 | 269 |
| SPI1        | 61   | 3 | 270 |
| TSGA10IP    | 61   | 7 | 271 |
| BTBD3       | 60.5 | 4 | 272 |
| FBRSL1      | 60.5 | 6 | 273 |
| FGF8        | 60.5 | 5 | 274 |
| GLRX3       | 60.5 | 2 | 275 |
| HTRA3       | 60.5 | 3 | 276 |
| MIR194-2    | 60.5 | 4 | 277 |
| MIR3132     | 60.5 | 4 | 278 |
| PTPRJ       | 60.5 | 4 | 279 |
| SLC25A48    | 60.5 | 6 | 280 |
| TSEN54      | 60.5 | 1 | 281 |
| ADAMTSL2    | 60   | 5 | 282 |
| ALDH3B1     | 60   | 5 | 283 |
| AMIGO1      | 60   | 6 | 284 |
| BIRC5       | 60   | 4 | 285 |
| DDN         | 60   | 3 | 286 |
| SH2D4A      | 60   | 2 | 287 |
| TCEA1       | 60   | 7 | 288 |
| ZNF556      | 60   | 6 | 289 |
| CD320       | 59.5 | 5 | 290 |
| MIR5093     | 59.5 | 4 | 291 |
| NUP210P3    | 59.5 | 4 | 292 |

|            |      |   |     |
|------------|------|---|-----|
| PPM1M      | 59.5 | 6 | 293 |
| PTPN18     | 59.5 | 4 | 294 |
| RNASEL     | 59.5 | 4 | 295 |
| SCRIB      | 59.5 | 3 | 296 |
| C7orf49    | 59   | 3 | 297 |
| CHRM3      | 59   | 6 | 298 |
| DOC2A      | 59   | 5 | 299 |
| RASL11B    | 59   | 4 | 300 |
| RSAD2      | 59   | 5 | 301 |
| ZNF184     | 59   | 6 | 302 |
| AKT1       | 58.5 | 2 | 303 |
| C7orf26    | 58.5 | 6 | 304 |
| CAPN5      | 58.5 | 3 | 305 |
| CD81       | 58.5 | 5 | 306 |
| GRK7       | 58.5 | 4 | 307 |
| RPL14      | 58.5 | 2 | 308 |
| ATP11A-AS1 | 58   | 6 | 309 |
| C5orf15    | 58   | 3 | 310 |
| FANCG      | 58   | 4 | 311 |
| MIR146B    | 58   | 4 | 312 |
| MXD3       | 58   | 4 | 313 |
| OAZ2       | 58   | 6 | 314 |
| RARRES2P4  | 58   | 3 | 315 |
| RNA5SP497  | 58   | 6 | 316 |
| SNHG6      | 58   | 4 | 317 |
| DBX1       | 57.5 | 9 | 318 |
| MUS81      | 57.5 | 5 | 319 |
| NPAS2      | 57.5 | 4 | 320 |
| OLFM2      | 57.5 | 6 | 321 |
| RN7SL59P   | 57.5 | 2 | 322 |
| RNF14      | 57.5 | 5 | 323 |
| SNRNP200   | 57.5 | 1 | 324 |
| TATDN3     | 57.5 | 1 | 325 |
| ABHD5      | 57   | 3 | 326 |
| MAFK       | 57   | 4 | 327 |
| NMUR1      | 57   | 4 | 328 |
| RN7SL121P  | 57   | 5 | 329 |
| RNU6-318P  | 57   | 4 | 330 |
| C2orf62    | 56.5 | 4 | 331 |
| KCNS1      | 56.5 | 6 | 332 |
| NXF1       | 56.5 | 2 | 333 |
| PTPRN      | 56.5 | 3 | 334 |
| TAPT1      | 56.5 | 4 | 335 |
| VAC14-AS1  | 56.5 | 4 | 336 |
| ZNF696     | 56.5 | 6 | 337 |
| C11orf16   | 56   | 4 | 338 |
| CACNG8     | 56   | 5 | 339 |
| IKZF1      | 56   | 6 | 340 |
| TBL2       | 56   | 4 | 341 |
| ABCC6P2    | 55.5 | 6 | 342 |

|            |      |   |     |
|------------|------|---|-----|
| H3F3BP1    | 55.5 | 2 | 343 |
| MIR4691    | 55.5 | 7 | 344 |
| PTBP1      | 55.5 | 5 | 345 |
| SLC15A4    | 55.5 | 4 | 346 |
| SLC35G5    | 55.5 | 6 | 347 |
| CHTF8P1    | 55   | 2 | 348 |
| FUT1       | 55   | 5 | 349 |
| IGFL4      | 55   | 3 | 350 |
| INHBB      | 55   | 6 | 351 |
| RN7SL9P    | 55   | 4 | 352 |
| ZBTB45     | 55   | 5 | 353 |
| ADCY10P1   | 54.5 | 4 | 354 |
| ETNK2      | 54.5 | 5 | 355 |
| GIPC3      | 54.5 | 5 | 356 |
| LINC00398  | 54.5 | 5 | 357 |
| NAMPT      | 54.5 | 3 | 358 |
| RECK       | 54.5 | 5 | 359 |
| RNU1-134P  | 54.5 | 4 | 360 |
| RPS27L     | 54.5 | 2 | 361 |
| CAMSAP1    | 54   | 4 | 362 |
| DPY19L2P1  | 54   | 4 | 363 |
| FANCD2     | 54   | 3 | 364 |
| HRC        | 54   | 4 | 365 |
| MYO1G      | 54   | 4 | 366 |
| POLR1E     | 54   | 5 | 367 |
| RNA5SP379  | 54   | 3 | 368 |
| RNU6-28P   | 54   | 3 | 369 |
| TMEM72-AS1 | 54   | 4 | 370 |
| BCAR1      | 53.5 | 3 | 371 |
| C19orf73   | 53.5 | 4 | 372 |
| CD99L2     | 53.5 | 5 | 373 |
| CLU        | 53.5 | 5 | 374 |
| ICAM2      | 53.5 | 4 | 375 |
| KCTD19     | 53.5 | 1 | 376 |
| LRP4       | 53.5 | 3 | 377 |
| MAPK8IP1   | 53.5 | 5 | 378 |
| MIR142     | 53.5 | 5 | 379 |
| RN7SL68P   | 53.5 | 4 | 380 |
| C3orf37    | 53   | 2 | 381 |
| CNOT1      | 53   | 6 | 382 |
| FAM83H     | 53   | 1 | 383 |
| GPRC5B     | 53   | 4 | 384 |
| LRPAP1     | 53   | 5 | 385 |
| SCRT1      | 53   | 4 | 386 |
| ZNF552     | 53   | 5 | 387 |
| C20orf112  | 52.5 | 2 | 388 |
| LINC00885  | 52.5 | 3 | 389 |
| LINC00942  | 52.5 | 4 | 390 |
| STAM       | 52.5 | 6 | 391 |
| TFE3       | 52.5 | 5 | 392 |



|            |      |   |     |
|------------|------|---|-----|
| ADRA2B     | 52   | 4 | 393 |
| ASIC3      | 52   | 3 | 394 |
| HTR5BP     | 52   | 8 | 395 |
| LINC00543  | 52   | 5 | 396 |
| MIR136     | 52   | 5 | 397 |
| ST3GAL5    | 52   | 5 | 398 |
| ZCCHC10    | 52   | 1 | 399 |
| DRC1       | 51.5 | 2 | 400 |
| MAK16      | 51.5 | 2 | 401 |
| MFSD6L     | 51.5 | 3 | 402 |
| ZNF252P    | 51.5 | 5 | 403 |
| ABHD17AP1  | 51   | 4 | 404 |
| ALAS1      | 51   | 3 | 405 |
| C2orf61    | 51   | 3 | 406 |
| NPRL3      | 51   | 6 | 407 |
| NRADDP     | 51   | 3 | 408 |
| PRF1       | 51   | 3 | 409 |
| RNU6-1095P | 51   | 3 | 410 |
| RNU6-199P  | 51   | 4 | 411 |
| RNU7-193P  | 51   | 4 | 412 |
| SNRPGP3    | 51   | 6 | 413 |
| TRAV1-1    | 51   | 2 | 414 |
| HMG20B     | 50.5 | 4 | 415 |
| LMX1B      | 50.5 | 6 | 416 |
| LRP1       | 50.5 | 3 | 417 |
| MIR365B    | 50.5 | 5 | 418 |
| MROH5      | 50.5 | 4 | 419 |
| NRBP2      | 50.5 | 2 | 420 |
| RNA5SP101  | 50.5 | 4 | 421 |
| SIRPB2     | 50.5 | 3 | 422 |
| WDR34      | 50.5 | 5 | 423 |
| B3GNT7     | 50   | 2 | 424 |
| C10orf137  | 50   | 5 | 425 |
| ECHDC3     | 50   | 4 | 426 |
| MACROD1    | 50   | 3 | 427 |
| MYH14      | 50   | 5 | 428 |
| PDCD5      | 50   | 3 | 429 |
| TESC       | 50   | 3 | 430 |
| C12orf10   | 49.5 | 4 | 431 |
| C8orf46    | 49.5 | 2 | 432 |
| CKBP1      | 49.5 | 5 | 433 |
| DLG5-AS1   | 49.5 | 1 | 434 |
| DTYMK      | 49.5 | 2 | 435 |
| PCBP3      | 49.5 | 5 | 436 |
| RAX        | 49.5 | 5 | 437 |
| SIGIRR     | 49.5 | 6 | 438 |
| SYN3       | 49.5 | 4 | 439 |
| SYT3       | 49.5 | 4 | 440 |
| VTI1BP2    | 49.5 | 5 | 441 |
| ZC3H8      | 49.5 | 4 | 442 |

|            |      |   |     |
|------------|------|---|-----|
| CST7       | 49   | 2 | 443 |
| FAM90A18P  | 49   | 2 | 444 |
| GSC2       | 49   | 3 | 445 |
| HEY1       | 49   | 1 | 446 |
| HSPA4L     | 49   | 4 | 447 |
| KRTAP5-14P | 49   | 4 | 448 |
| LAMA1      | 49   | 2 | 449 |
| MIR4448    | 49   | 4 | 450 |
| PGPEP1     | 49   | 5 | 451 |
| SEPT7P9    | 49   | 5 | 452 |
| SPSB1      | 49   | 4 | 453 |
| ZNF555     | 49   | 2 | 454 |
| A2ML1-AS1  | 48.5 | 5 | 455 |
| CERS1      | 48.5 | 3 | 456 |
| CHST10     | 48.5 | 2 | 457 |
| DCHS1      | 48.5 | 4 | 458 |
| FAM69C     | 48.5 | 5 | 459 |
| GINS3      | 48.5 | 3 | 460 |
| LINC00954  | 48.5 | 3 | 461 |
| MIR27B     | 48.5 | 5 | 462 |
| MIR4739    | 48.5 | 5 | 463 |
| NDUFB10    | 48.5 | 2 | 464 |
| OCIAD2     | 48.5 | 4 | 465 |
| PSMB8      | 48.5 | 2 | 466 |
| SNTB2      | 48.5 | 4 | 467 |
| TLN2       | 48.5 | 5 | 468 |
| WT1        | 48.5 | 4 | 469 |
| ZDHHC8P1   | 48.5 | 3 | 470 |
| ARHGDIG    | 48   | 3 | 471 |
| BSCL2      | 48   | 4 | 472 |
| GRM4       | 48   | 5 | 473 |
| IRF6       | 48   | 1 | 474 |
| MYSM1      | 48   | 3 | 475 |
| RNA5SP378  | 48   | 4 | 476 |
| RNU1-129P  | 48   | 5 | 477 |
| SERTM1     | 48   | 3 | 478 |
| SPEG       | 48   | 4 | 479 |
| TICAM1     | 48   | 6 | 480 |
| TMEM145    | 48   | 3 | 481 |
| ZNF259     | 48   | 3 | 482 |
| ABCC6      | 47.5 | 4 | 483 |
| BHLHA15    | 47.5 | 4 | 484 |
| CHST11     | 47.5 | 4 | 485 |
| CRABP2     | 47.5 | 3 | 486 |
| HLA-J      | 47.5 | 5 | 487 |
| LCN1P1     | 47.5 | 4 | 488 |
| LSMEM2     | 47.5 | 2 | 489 |
| MIR769     | 47.5 | 3 | 490 |
| PELI1      | 47.5 | 2 | 491 |
| R3HDM4     | 47.5 | 4 | 492 |

|            |      |   |     |
|------------|------|---|-----|
| RNF157-AS1 | 47.5 | 6 | 493 |
| SNORA74B   | 47.5 | 2 | 494 |
| TMEM215    | 47.5 | 6 | 495 |
| ABHD17A    | 47   | 5 | 496 |
| CNBD2      | 47   | 4 | 497 |
| GRIA4      | 47   | 3 | 498 |
| MIR1237    | 47   | 7 | 499 |
| MRGPRX3    | 47   | 4 | 500 |

**Supplementary Table S22. List of the top 500 5hmC-gaining promoters based on the highest fold change increase after induced overexpression of *TET1* .**

These promoters were characterized by endogenous 5hmC content above the threshold of 5 reads for positive 5hmC identification per 5hmC site and showed increased 5hmC read numbers after *TET1* overexpression. Read numbers above the threshold were accumulated per promoter region.

| gene_symbol | RRHP_+Dox_reads | RRHP_-Dox_reads | RRHP_5hmC_sites | fold_change | rank |
|-------------|-----------------|-----------------|-----------------|-------------|------|
| DEAF1       | 350.5           | 5.5             | 18              | 63.73       | 1    |
| MIR3940     | 243.5           | 5               | 17              | 48.70       | 2    |
| ARPC1B      | 206             | 5               | 11              | 41.20       | 3    |
| PPDPF       | 262             | 6.5             | 12              | 40.31       | 4    |
| FSTL3       | 201             | 5               | 15              | 40.20       | 5    |
| MBP         | 195.5           | 5               | 9               | 39.10       | 6    |
| MIR3649     | 440             | 12              | 17              | 36.67       | 7    |
| GNG13       | 182             | 5               | 13              | 36.40       | 8    |
| GAREML      | 175             | 5               | 10              | 35.00       | 9    |
| EIF4E1B     | 187.5           | 5.5             | 8               | 34.09       | 10   |
| S1PR3       | 164.5           | 5               | 10              | 32.90       | 11   |
| FAIM2       | 178             | 5.5             | 7               | 32.36       | 12   |
| ACY1        | 192             | 6               | 9               | 32.00       | 13   |
| ATP12A      | 158             | 5               | 6               | 31.60       | 14   |
| KIAA1875    | 170             | 5.5             | 11              | 30.91       | 15   |
| GRID1       | 212.5           | 7               | 14              | 30.36       | 16   |
| DMPK        | 150.5           | 5               | 9               | 30.10       | 17   |
| EBF4        | 164.5           | 5.5             | 7               | 29.91       | 18   |
| C2orf50     | 149             | 5               | 7               | 29.80       | 19   |
| MIR589      | 148.5           | 5               | 10              | 29.70       | 20   |
| MIR3187     | 160.5           | 5.5             | 13              | 29.18       | 21   |
| NELFCD      | 201             | 7               | 8               | 28.71       | 22   |
| CCNA1       | 197.5           | 7               | 8               | 28.21       | 23   |
| HRH3        | 151.5           | 5.5             | 8               | 27.55       | 24   |
| ZNF423      | 163.5           | 6               | 7               | 27.25       | 25   |
| RPS13       | 176             | 6.5             | 11              | 27.08       | 26   |
| BEGAIN      | 148.5           | 5.5             | 2               | 27.00       | 27   |
| MIR4656     | 175.5           | 6.5             | 17              | 27.00       | 28   |
| DDAH2       | 134             | 5               | 8               | 26.80       | 29   |
| NKX2-1-AS1  | 147             | 5.5             | 12              | 26.73       | 30   |
| NR5A1       | 146             | 5.5             | 11              | 26.55       | 31   |
| KLF4        | 157.5           | 6               | 9               | 26.25       | 32   |
| HRH2        | 129.5           | 5               | 5               | 25.90       | 33   |
| RELN        | 168             | 6.5             | 9               | 25.85       | 34   |
| CHTF18      | 279.5           | 11              | 16              | 25.41       | 35   |
| MAPK8       | 215.5           | 8.5             | 5               | 25.35       | 36   |
| ATP2B3      | 189.5           | 7.5             | 11              | 25.27       | 37   |
| VWCE        | 164             | 6.5             | 9               | 25.23       | 38   |
| CTRB2       | 136             | 5.5             | 10              | 24.73       | 39   |
| WDR63       | 135.5           | 5.5             | 7               | 24.64       | 40   |
| VPS37D      | 171             | 7               | 10              | 24.43       | 41   |
| DHPS        | 122             | 5               | 9               | 24.40       | 42   |
| NGF         | 170.5           | 7               | 8               | 24.36       | 43   |
| RIMS4       | 170             | 7               | 3               | 24.29       | 44   |
| CDSN        | 120             | 5               | 6               | 24.00       | 45   |
| AMZ1        | 168             | 7               | 9               | 24.00       | 46   |
| LCN6        | 119.5           | 5               | 8               | 23.90       | 47   |
| PPP1R1B     | 177             | 7.5             | 11              | 23.60       | 48   |
| HEMK1       | 116             | 5               | 9               | 23.20       | 49   |
| TENM3       | 115             | 5               | 7               | 23.00       | 50   |

|             |       |      |    |       |     |
|-------------|-------|------|----|-------|-----|
| ZNF503-AS2  | 126.5 | 5.5  | 8  | 23.00 | 51  |
| ICAM5       | 160.5 | 7    | 11 | 22.93 | 52  |
| GRK1        | 146   | 6.5  | 10 | 22.46 | 53  |
| C8orf31     | 112   | 5    | 6  | 22.40 | 54  |
| SPPL2A      | 200   | 9    | 7  | 22.22 | 55  |
| MC1R        | 120.5 | 5.5  | 8  | 21.91 | 56  |
| WNT10B      | 109.5 | 5    | 4  | 21.90 | 57  |
| ZNF276      | 141   | 6.5  | 9  | 21.69 | 58  |
| MIR1226     | 291   | 13.5 | 14 | 21.56 | 59  |
| PPP2R2C     | 128.5 | 6    | 8  | 21.42 | 60  |
| JPH2        | 107   | 5    | 7  | 21.40 | 61  |
| TBC1D1      | 107   | 5    | 7  | 21.40 | 62  |
| MRPS31P5    | 106.5 | 5    | 9  | 21.30 | 63  |
| C9orf141    | 212   | 10   | 14 | 21.20 | 64  |
| MIR133A2    | 169.5 | 8    | 10 | 21.19 | 65  |
| SULT1A3     | 169.5 | 8    | 5  | 21.19 | 66  |
| MAP4K4      | 116   | 5.5  | 6  | 21.09 | 67  |
| AMDHD2      | 104.5 | 5    | 6  | 20.90 | 68  |
| MIR193A     | 104.5 | 5    | 9  | 20.90 | 69  |
| MORN3       | 114.5 | 5.5  | 8  | 20.82 | 70  |
| TCF24       | 124.5 | 6    | 7  | 20.75 | 71  |
| SATB2       | 103.5 | 5    | 5  | 20.70 | 72  |
| EXOC2       | 124   | 6    | 6  | 20.67 | 73  |
| LINC00475   | 113   | 5.5  | 7  | 20.55 | 74  |
| PLCXD1      | 122.5 | 6    | 6  | 20.42 | 75  |
| ANKRD18DP   | 102   | 5    | 4  | 20.40 | 76  |
| MEIS1-AS2   | 122   | 6    | 5  | 20.33 | 77  |
| SHANK2      | 152   | 7.5  | 5  | 20.27 | 78  |
| SEMA6C      | 141.5 | 7    | 3  | 20.21 | 79  |
| PPP1R18     | 101   | 5    | 4  | 20.20 | 80  |
| ZNF584      | 131   | 6.5  | 7  | 20.15 | 81  |
| RNF144A     | 150.5 | 7.5  | 5  | 20.07 | 82  |
| TPSP2       | 180.5 | 9    | 8  | 20.06 | 83  |
| H6PD        | 230.5 | 11.5 | 8  | 20.04 | 84  |
| C16orf72    | 110   | 5.5  | 8  | 20.00 | 85  |
| POU4F3      | 130   | 6.5  | 9  | 20.00 | 86  |
| NCS1        | 240   | 12   | 6  | 20.00 | 87  |
| PTP4A2P1    | 159.5 | 8    | 6  | 19.94 | 88  |
| ASCL2       | 99.5  | 5    | 8  | 19.90 | 89  |
| MAMSTR      | 148   | 7.5  | 6  | 19.73 | 90  |
| RN7SL830P   | 108.5 | 5.5  | 8  | 19.73 | 91  |
| RNU6-510P   | 108.5 | 5.5  | 5  | 19.73 | 92  |
| BCORL1      | 138   | 7    | 9  | 19.71 | 93  |
| PNOC        | 98.5  | 5    | 5  | 19.70 | 94  |
| AGAP1       | 157   | 8    | 7  | 19.63 | 95  |
| PPAP2C      | 205.5 | 10.5 | 8  | 19.57 | 96  |
| CPNE7       | 97.5  | 5    | 10 | 19.50 | 97  |
| SIRT5       | 136.5 | 7    | 6  | 19.50 | 98  |
| KCNC3       | 107   | 5.5  | 6  | 19.45 | 99  |
| RAB20       | 136   | 7    | 4  | 19.43 | 100 |
| SHARPIN     | 204   | 10.5 | 11 | 19.43 | 101 |
| VPS9D1-AS1  | 349.5 | 18   | 17 | 19.42 | 102 |
| AP2A2       | 97    | 5    | 8  | 19.40 | 103 |
| CD79B       | 126   | 6.5  | 6  | 19.38 | 104 |
| ZBED3       | 126   | 6.5  | 3  | 19.38 | 105 |
| CACNA1C-AS1 | 96.5  | 5    | 7  | 19.30 | 106 |

|            |       |      |    |       |     |
|------------|-------|------|----|-------|-----|
| RN7SL838P  | 193   | 10   | 13 | 19.30 | 107 |
| SLC6A4     | 154   | 8    | 11 | 19.25 | 108 |
| SLC38A1    | 173   | 9    | 5  | 19.22 | 109 |
| ZNF598     | 105.5 | 5.5  | 8  | 19.18 | 110 |
| ACKR6      | 95.5  | 5    | 5  | 19.10 | 111 |
| ANTXR1     | 95.5  | 5    | 4  | 19.10 | 112 |
| C11orf91   | 95.5  | 5    | 4  | 19.10 | 113 |
| C9orf117   | 105   | 5.5  | 4  | 19.09 | 114 |
| TNS3       | 219.5 | 11.5 | 8  | 19.09 | 115 |
| CYP2D7P1   | 124   | 6.5  | 6  | 19.08 | 116 |
| KCNJ11     | 104.5 | 5.5  | 4  | 19.00 | 117 |
| CCNF       | 123.5 | 6.5  | 6  | 19.00 | 118 |
| CBX8       | 142   | 7.5  | 6  | 18.93 | 119 |
| RPS10      | 94.5  | 5    | 7  | 18.90 | 120 |
| C11orf35   | 113   | 6    | 6  | 18.83 | 121 |
| SCT        | 113   | 6    | 6  | 18.83 | 122 |
| RHOB       | 319.5 | 17   | 10 | 18.79 | 123 |
| LOXL3      | 131.5 | 7    | 9  | 18.79 | 124 |
| PPP1R16A   | 225   | 12   | 8  | 18.75 | 125 |
| FAAH       | 130.5 | 7    | 4  | 18.64 | 126 |
| KCNT1      | 130.5 | 7    | 4  | 18.64 | 127 |
| LCN10      | 177   | 9.5  | 8  | 18.63 | 128 |
| FAM53A     | 130   | 7    | 5  | 18.57 | 129 |
| ABHD11     | 139   | 7.5  | 5  | 18.53 | 130 |
| ACTG1      | 147.5 | 8    | 9  | 18.44 | 131 |
| MIR671     | 92    | 5    | 7  | 18.40 | 132 |
| GRPEL1     | 137.5 | 7.5  | 5  | 18.33 | 133 |
| DLL1       | 174   | 9.5  | 6  | 18.32 | 134 |
| FTSJ3      | 164.5 | 9    | 7  | 18.28 | 135 |
| ANKRD20A8P | 100.5 | 5.5  | 8  | 18.27 | 136 |
| HR         | 209.5 | 11.5 | 13 | 18.22 | 137 |
| ANKDD1B    | 91    | 5    | 6  | 18.20 | 138 |
| QRFP       | 136.5 | 7.5  | 10 | 18.20 | 139 |
| CDKN2D     | 109   | 6    | 5  | 18.17 | 140 |
| FGFR3      | 218   | 12   | 5  | 18.17 | 141 |
| TWIST2     | 181   | 10   | 11 | 18.10 | 142 |
| KDELR3     | 117.5 | 6.5  | 5  | 18.08 | 143 |
| SIRPA      | 144.5 | 8    | 7  | 18.06 | 144 |
| PNPLA6     | 90    | 5    | 4  | 18.00 | 145 |
| MYEOV2     | 108   | 6    | 4  | 18.00 | 146 |
| MATK       | 314.5 | 17.5 | 9  | 17.97 | 147 |
| TNNT3      | 107.5 | 6    | 10 | 17.92 | 148 |
| JDP2       | 98.5  | 5.5  | 5  | 17.91 | 149 |
| CABP4      | 89.5  | 5    | 7  | 17.90 | 150 |
| ZBTB3      | 89.5  | 5    | 5  | 17.90 | 151 |
| OPTN       | 98    | 5.5  | 7  | 17.82 | 152 |
| MYL3       | 89    | 5    | 6  | 17.80 | 153 |
| PLIN5      | 89    | 5    | 5  | 17.80 | 154 |
| HPN        | 204.5 | 11.5 | 8  | 17.78 | 155 |
| ANKRD63    | 115.5 | 6.5  | 4  | 17.77 | 156 |
| MIR4800    | 150.5 | 8.5  | 10 | 17.71 | 157 |
| ARC        | 88.5  | 5    | 3  | 17.70 | 158 |
| MYADM      | 132.5 | 7.5  | 5  | 17.67 | 159 |
| INSRR      | 185.5 | 10.5 | 7  | 17.67 | 160 |
| HTT        | 97    | 5.5  | 5  | 17.64 | 161 |
| SOX13      | 158.5 | 9    | 8  | 17.61 | 162 |

|             |       |      |    |       |     |
|-------------|-------|------|----|-------|-----|
| RN7SL391P   | 88    | 5    | 5  | 17.60 | 163 |
| RPL7P4      | 96.5  | 5.5  | 6  | 17.55 | 164 |
| FAM181A-AS1 | 96    | 5.5  | 9  | 17.45 | 165 |
| SLC43A2     | 174.5 | 10   | 10 | 17.45 | 166 |
| NOP14-AS1   | 122   | 7    | 4  | 17.43 | 167 |
| ACSL1       | 104.5 | 6    | 5  | 17.42 | 168 |
| DGKI        | 104.5 | 6    | 5  | 17.42 | 169 |
| OVOL1       | 104.5 | 6    | 8  | 17.42 | 170 |
| FLVCR2      | 87    | 5    | 4  | 17.40 | 171 |
| IFITM5      | 130.5 | 7.5  | 4  | 17.40 | 172 |
| TBC1D29     | 86.5  | 5    | 4  | 17.30 | 173 |
| ZHX1        | 86.5  | 5    | 5  | 17.30 | 174 |
| SNORD88B    | 103.5 | 6    | 6  | 17.25 | 175 |
| SCARF2      | 422.5 | 24.5 | 13 | 17.24 | 176 |
| WDR38       | 318   | 18.5 | 12 | 17.19 | 177 |
| RIPK1       | 94.5  | 5.5  | 9  | 17.18 | 178 |
| MIR4749     | 120   | 7    | 8  | 17.14 | 179 |
| NOTUM       | 180   | 10.5 | 9  | 17.14 | 180 |
| SLC22A18AS  | 248.5 | 14.5 | 14 | 17.14 | 181 |
| TNFRSF10D   | 111   | 6.5  | 6  | 17.08 | 182 |
| IFITM2      | 85    | 5    | 6  | 17.00 | 183 |
| CHST2       | 93.5  | 5.5  | 6  | 17.00 | 184 |
| C1orf216    | 118.5 | 7    | 6  | 16.93 | 185 |
| CDH1        | 118.5 | 7    | 2  | 16.93 | 186 |
| SMPX        | 93    | 5.5  | 4  | 16.91 | 187 |
| IPO4        | 84.5  | 5    | 4  | 16.90 | 188 |
| MCM2        | 84.5  | 5    | 5  | 16.90 | 189 |
| MYOZ1       | 84.5  | 5    | 4  | 16.90 | 190 |
| BRD1        | 202.5 | 12   | 5  | 16.88 | 191 |
| ADAM11      | 84    | 5    | 3  | 16.80 | 192 |
| MIR661      | 210   | 12.5 | 12 | 16.80 | 193 |
| MIR4525     | 100.5 | 6    | 5  | 16.75 | 194 |
| PIEZO2      | 83.5  | 5    | 7  | 16.70 | 195 |
| SLC13A5     | 100   | 6    | 10 | 16.67 | 196 |
| MIR196A1    | 191.5 | 11.5 | 10 | 16.65 | 197 |
| IFITM10     | 116.5 | 7    | 8  | 16.64 | 198 |
| UCN         | 191   | 11.5 | 12 | 16.61 | 199 |
| MIR152      | 274   | 16.5 | 12 | 16.61 | 200 |
| PRSS8       | 83    | 5    | 5  | 16.60 | 201 |
| ALOX5       | 116   | 7    | 5  | 16.57 | 202 |
| UBP1        | 124   | 7.5  | 7  | 16.53 | 203 |
| MIR1234     | 148   | 9    | 6  | 16.44 | 204 |
| ATHL1       | 197   | 12   | 7  | 16.42 | 205 |
| IGFL1P2     | 82    | 5    | 6  | 16.40 | 206 |
| RAMP2-AS1   | 106.5 | 6.5  | 6  | 16.38 | 207 |
| SULT1A4     | 163.5 | 10   | 5  | 16.35 | 208 |
| RIIAD1      | 106   | 6.5  | 7  | 16.31 | 209 |
| PLXND1      | 114   | 7    | 5  | 16.29 | 210 |
| BZRAP1-AS1  | 89.5  | 5.5  | 7  | 16.27 | 211 |
| CHRD        | 146   | 9    | 4  | 16.22 | 212 |
| FNDC1       | 186.5 | 11.5 | 13 | 16.22 | 213 |
| CSRP2BP     | 81    | 5    | 5  | 16.20 | 214 |
| STAG3       | 81    | 5    | 3  | 16.20 | 215 |
| ZNF774      | 234.5 | 14.5 | 7  | 16.17 | 216 |
| NTF6B       | 105   | 6.5  | 5  | 16.15 | 217 |
| CLDN5       | 80.5  | 5    | 5  | 16.10 | 218 |

|            |       |      |    |       |     |
|------------|-------|------|----|-------|-----|
| P2RY2      | 201   | 12.5 | 6  | 16.08 | 219 |
| TMEM120A   | 112.5 | 7    | 3  | 16.07 | 220 |
| CDIPT      | 144.5 | 9    | 5  | 16.06 | 221 |
| TNFRSF13C  | 184.5 | 11.5 | 13 | 16.04 | 222 |
| SUV420H1   | 80    | 5    | 7  | 16.00 | 223 |
| FIZ1       | 128   | 8    | 9  | 16.00 | 224 |
| ACOT7      | 207.5 | 13   | 4  | 15.96 | 225 |
| VIPR2      | 103.5 | 6.5  | 1  | 15.92 | 226 |
| CDH15      | 207   | 13   | 7  | 15.92 | 227 |
| ANKRD9     | 95.5  | 6    | 6  | 15.92 | 228 |
| ATP2A1     | 87.5  | 5.5  | 6  | 15.91 | 229 |
| UBXN10     | 79.5  | 5    | 6  | 15.90 | 230 |
| MIR5088    | 87    | 5.5  | 10 | 15.82 | 231 |
| AK5        | 79    | 5    | 7  | 15.80 | 232 |
| MGLL       | 79    | 5    | 2  | 15.80 | 233 |
| ZAR1       | 79    | 5    | 7  | 15.80 | 234 |
| ETHE1      | 94.5  | 6    | 7  | 15.75 | 235 |
| PNMA6A     | 94.5  | 6    | 7  | 15.75 | 236 |
| GDF7       | 283   | 18   | 14 | 15.72 | 237 |
| ARHGAP23   | 212   | 13.5 | 9  | 15.70 | 238 |
| SLC7A4     | 78.5  | 5    | 7  | 15.70 | 239 |
| ZNF600     | 94    | 6    | 6  | 15.67 | 240 |
| RNF223     | 227   | 14.5 | 13 | 15.66 | 241 |
| FAM132A    | 296.5 | 19   | 15 | 15.61 | 242 |
| HAND2      | 78    | 5    | 7  | 15.60 | 243 |
| KLHL30     | 78    | 5    | 6  | 15.60 | 244 |
| ZNF502     | 78    | 5    | 6  | 15.60 | 245 |
| SNX3       | 93.5  | 6    | 4  | 15.58 | 246 |
| HS3ST6     | 202.5 | 13   | 14 | 15.58 | 247 |
| SCUBE3     | 124.5 | 8    | 9  | 15.56 | 248 |
| OSCAR      | 85.5  | 5.5  | 7  | 15.55 | 249 |
| SOX8       | 225   | 14.5 | 10 | 15.52 | 250 |
| CD164L2    | 108.5 | 7    | 7  | 15.50 | 251 |
| MGRN1      | 186   | 12   | 8  | 15.50 | 252 |
| GCM2       | 108   | 7    | 7  | 15.43 | 253 |
| UQCC       | 131   | 8.5  | 7  | 15.41 | 254 |
| MRPS31     | 77    | 5    | 6  | 15.40 | 255 |
| TMCO4      | 77    | 5    | 5  | 15.40 | 256 |
| MYD88      | 161.5 | 10.5 | 3  | 15.38 | 257 |
| MPPED1     | 84.5  | 5.5  | 4  | 15.36 | 258 |
| SLC1A1     | 84.5  | 5.5  | 3  | 15.36 | 259 |
| ANKRD53    | 92    | 6    | 9  | 15.33 | 260 |
| CNTFR      | 705   | 46   | 25 | 15.33 | 261 |
| DKC1       | 99.5  | 6.5  | 6  | 15.31 | 262 |
| ZNF57      | 76.5  | 5    | 4  | 15.30 | 263 |
| GPR17      | 84    | 5.5  | 7  | 15.27 | 264 |
| ST6GALNAC6 | 84    | 5.5  | 7  | 15.27 | 265 |
| CIRBP-AS1  | 152.5 | 10   | 5  | 15.25 | 266 |
| PTGES      | 183   | 12   | 9  | 15.25 | 267 |
| HOXD12     | 182.5 | 12   | 12 | 15.21 | 268 |
| RSPO3      | 76    | 5    | 6  | 15.20 | 269 |
| TMEM235    | 76    | 5    | 4  | 15.20 | 270 |
| FRMD3      | 91    | 6    | 5  | 15.17 | 271 |
| IGHG1      | 189.5 | 12.5 | 12 | 15.16 | 272 |
| HOXD13     | 212   | 14   | 6  | 15.14 | 273 |
| MIR4689    | 121   | 8    | 7  | 15.13 | 274 |



|                 |       |      |    |       |     |
|-----------------|-------|------|----|-------|-----|
| C2orf27B        | 83    | 5.5  | 4  | 15.09 | 275 |
| TRABD2A         | 173.5 | 11.5 | 7  | 15.09 | 276 |
| RNU1-28P        | 188.5 | 12.5 | 6  | 15.08 | 277 |
| FAM105B         | 105.5 | 7    | 4  | 15.07 | 278 |
| CCP110          | 218.5 | 14.5 | 3  | 15.07 | 279 |
| SLC22A11        | 113   | 7.5  | 9  | 15.07 | 280 |
| LINC00574       | 128   | 8.5  | 5  | 15.06 | 281 |
| MIR23A          | 150.5 | 10   | 9  | 15.05 | 282 |
| EPHA1-AS1       | 75    | 5    | 5  | 15.00 | 283 |
| PSMD4           | 82.5  | 5.5  | 8  | 15.00 | 284 |
| CYP24A1         | 127.5 | 8.5  | 5  | 15.00 | 285 |
| KANK3           | 187.5 | 12.5 | 13 | 15.00 | 286 |
| ENDOV           | 322.5 | 21.5 | 9  | 15.00 | 287 |
| EXOC7           | 239.5 | 16   | 11 | 14.97 | 288 |
| TPSAB1          | 127   | 8.5  | 6  | 14.94 | 289 |
| MRPL34          | 112   | 7.5  | 9  | 14.93 | 290 |
| EMC7            | 104.5 | 7    | 4  | 14.93 | 291 |
| ERVFRD-1        | 97    | 6.5  | 3  | 14.92 | 292 |
| RPL29           | 97    | 6.5  | 2  | 14.92 | 293 |
| RFPL2           | 89.5  | 6    | 4  | 14.92 | 294 |
| PPP4R2          | 82    | 5.5  | 4  | 14.91 | 295 |
| PDIA2           | 297.5 | 20   | 12 | 14.88 | 296 |
| ATP6AP1         | 104   | 7    | 7  | 14.86 | 297 |
| CMKLR1          | 89    | 6    | 5  | 14.83 | 298 |
| MAFB            | 89    | 6    | 4  | 14.83 | 299 |
| MIR574          | 81.5  | 5.5  | 7  | 14.82 | 300 |
| PDZD4           | 370   | 25   | 7  | 14.80 | 301 |
| U2AF2           | 191.5 | 13   | 13 | 14.73 | 302 |
| SLC26A1         | 272.5 | 18.5 | 13 | 14.73 | 303 |
| LINC00028       | 81    | 5.5  | 10 | 14.73 | 304 |
| PRTN3           | 81    | 5.5  | 7  | 14.73 | 305 |
| CCDC79          | 132.5 | 9    | 6  | 14.72 | 306 |
| ZBTB46          | 250   | 17   | 13 | 14.71 | 307 |
| TMED11P         | 73.5  | 5    | 5  | 14.70 | 308 |
| ZNF287          | 88    | 6    | 5  | 14.67 | 309 |
| LRFN4           | 80.5  | 5.5  | 4  | 14.64 | 310 |
| MIR1180         | 80.5  | 5.5  | 6  | 14.64 | 311 |
| CCDC88B         | 73    | 5    | 6  | 14.60 | 312 |
| CA15P2          | 109.5 | 7.5  | 2  | 14.60 | 313 |
| ERGIC3          | 146   | 10   | 1  | 14.60 | 314 |
| YDJC            | 87.5  | 6    | 5  | 14.58 | 315 |
| PAX2            | 138.5 | 9.5  | 6  | 14.58 | 316 |
| FICD            | 102   | 7    | 3  | 14.57 | 317 |
| POLR1C          | 102   | 7    | 8  | 14.57 | 318 |
| SEPN1           | 80    | 5.5  | 3  | 14.55 | 319 |
| ZNF726          | 80    | 5.5  | 6  | 14.55 | 320 |
| FEZ1            | 94.5  | 6.5  | 4  | 14.54 | 321 |
| RNU6-1175P      | 109   | 7.5  | 6  | 14.53 | 322 |
| IGFALS          | 72.5  | 5    | 6  | 14.50 | 323 |
| FAM120B         | 87    | 6    | 6  | 14.50 | 324 |
| CCDC134         | 275   | 19   | 8  | 14.47 | 325 |
| TPRG1L          | 94    | 6.5  | 3  | 14.46 | 326 |
| SLC1A2          | 79.5  | 5.5  | 5  | 14.45 | 327 |
| SLC37A2         | 79.5  | 5.5  | 7  | 14.45 | 328 |
| TNFSF12-TNFSF13 | 115.5 | 8    | 7  | 14.44 | 329 |
| PARD6A          | 231   | 16   | 7  | 14.44 | 330 |

|           |       |      |    |       |     |
|-----------|-------|------|----|-------|-----|
| ACER1     | 86.5  | 6    | 9  | 14.42 | 331 |
| BACE1     | 72    | 5    | 3  | 14.40 | 332 |
| DYSF      | 72    | 5    | 6  | 14.40 | 333 |
| MYL5      | 72    | 5    | 6  | 14.40 | 334 |
| KCNA7     | 266   | 18.5 | 14 | 14.38 | 335 |
| PAX6      | 316   | 22   | 15 | 14.36 | 336 |
| MIR4321   | 437.5 | 30.5 | 14 | 14.34 | 337 |
| PPM1N     | 107.5 | 7.5  | 7  | 14.33 | 338 |
| BIN1      | 272   | 19   | 9  | 14.32 | 339 |
| RHCG      | 93    | 6.5  | 6  | 14.31 | 340 |
| RNF24     | 121.5 | 8.5  | 5  | 14.29 | 341 |
| MICA      | 100   | 7    | 3  | 14.29 | 342 |
| HPCA      | 85.5  | 6    | 7  | 14.25 | 343 |
| PRSS12    | 171   | 12   | 5  | 14.25 | 344 |
| STAC2     | 256.5 | 18   | 10 | 14.25 | 345 |
| HLA-K     | 71    | 5    | 5  | 14.20 | 346 |
| MRGPRG    | 106.5 | 7.5  | 5  | 14.20 | 347 |
| RGL2      | 106.5 | 7.5  | 5  | 14.20 | 348 |
| AGBL5-AS1 | 85    | 6    | 5  | 14.17 | 349 |
| MIR145    | 85    | 6    | 4  | 14.17 | 350 |
| MIR645    | 85    | 6    | 4  | 14.17 | 351 |
| MMP25     | 99    | 7    | 8  | 14.14 | 352 |
| RAD9A     | 148.5 | 10.5 | 9  | 14.14 | 353 |
| IGFBP4    | 247.5 | 17.5 | 8  | 14.14 | 354 |
| PRELID1P3 | 134   | 9.5  | 5  | 14.11 | 355 |
| HSPB8     | 70.5  | 5    | 4  | 14.10 | 356 |
| NME2      | 70.5  | 5    | 6  | 14.10 | 357 |
| MIR602    | 141   | 10   | 7  | 14.10 | 358 |
| MIOS      | 77.5  | 5.5  | 6  | 14.09 | 359 |
| ODF2      | 84.5  | 6    | 6  | 14.08 | 360 |
| PTPRN2    | 169   | 12   | 9  | 14.08 | 361 |
| OTUD1     | 183   | 13   | 9  | 14.08 | 362 |
| FGFRL1    | 112.5 | 8    | 8  | 14.06 | 363 |
| SMYD5     | 161.5 | 11.5 | 7  | 14.04 | 364 |
| ABCG8     | 70    | 5    | 3  | 14.00 | 365 |
| ALDH1L2   | 70    | 5    | 7  | 14.00 | 366 |
| IGHV3-71  | 77    | 5.5  | 2  | 14.00 | 367 |
| UBE2J1    | 77    | 5.5  | 3  | 14.00 | 368 |
| AXIN1     | 84    | 6    | 5  | 14.00 | 369 |
| AKAP12    | 98    | 7    | 6  | 14.00 | 370 |
| GLI2      | 105   | 7.5  | 9  | 14.00 | 371 |
| AHCY      | 140   | 10   | 6  | 14.00 | 372 |
| DCAF4     | 175   | 12.5 | 7  | 14.00 | 373 |
| CYB561    | 433.5 | 31   | 17 | 13.98 | 374 |
| RPL22     | 230   | 16.5 | 11 | 13.94 | 375 |
| KIAA1257  | 104.5 | 7.5  | 5  | 13.93 | 376 |
| PDLIM7    | 90.5  | 6.5  | 4  | 13.92 | 377 |
| PGM5-AS1  | 83.5  | 6    | 7  | 13.92 | 378 |
| C1orf65   | 76.5  | 5.5  | 8  | 13.91 | 379 |
| GDPGP1    | 69.5  | 5    | 5  | 13.90 | 380 |
| DUSP9     | 125   | 9    | 8  | 13.89 | 381 |
| SLC51A    | 111   | 8    | 5  | 13.88 | 382 |
| TRAPPC12  | 97    | 7    | 3  | 13.86 | 383 |
| PPP1R3G   | 173   | 12.5 | 17 | 13.84 | 384 |
| HN1L      | 83    | 6    | 4  | 13.83 | 385 |
| MOB3A     | 83    | 6    | 4  | 13.83 | 386 |

|            |       |      |    |       |     |
|------------|-------|------|----|-------|-----|
| GCGR       | 166   | 12   | 11 | 13.83 | 387 |
| HOXD4      | 117.5 | 8.5  | 4  | 13.82 | 388 |
| TNFRSF13B  | 76    | 5.5  | 7  | 13.82 | 389 |
| DSG2       | 103.5 | 7.5  | 5  | 13.80 | 390 |
| COL6A2     | 172.5 | 12.5 | 9  | 13.80 | 391 |
| CCDC136    | 379.5 | 27.5 | 11 | 13.80 | 392 |
| SDF4       | 96.5  | 7    | 8  | 13.79 | 393 |
| LCK        | 82.5  | 6    | 3  | 13.75 | 394 |
| RHOF       | 82.5  | 6    | 4  | 13.75 | 395 |
| KBTBD12    | 75.5  | 5.5  | 6  | 13.73 | 396 |
| KRI1       | 75.5  | 5.5  | 3  | 13.73 | 397 |
| RN7SL835P  | 75.5  | 5.5  | 3  | 13.73 | 398 |
| DPP7       | 96    | 7    | 6  | 13.71 | 399 |
| DNMT3L     | 185   | 13.5 | 8  | 13.70 | 400 |
| B4GALNT2   | 68.5  | 5    | 8  | 13.70 | 401 |
| NANOS1     | 150.5 | 11   | 6  | 13.68 | 402 |
| CACNB3     | 82    | 6    | 5  | 13.67 | 403 |
| C9orf89    | 75    | 5.5  | 5  | 13.64 | 404 |
| PCOLCE-AS1 | 75    | 5.5  | 5  | 13.64 | 405 |
| GIGYF2     | 88.5  | 6.5  | 5  | 13.62 | 406 |
| PPP1R3E    | 88.5  | 6.5  | 4  | 13.62 | 407 |
| PTPN7      | 177   | 13   | 10 | 13.62 | 408 |
| ZNF133     | 68    | 5    | 4  | 13.60 | 409 |
| CRAMP1L    | 183.5 | 13.5 | 8  | 13.59 | 410 |
| SLC9A3R2   | 203.5 | 15   | 11 | 13.57 | 411 |
| C3AR1      | 74.5  | 5.5  | 2  | 13.55 | 412 |
| PRUNE2     | 74.5  | 5.5  | 3  | 13.55 | 413 |
| SLC22A20   | 74.5  | 5.5  | 5  | 13.55 | 414 |
| BHLHE23    | 311.5 | 23   | 12 | 13.54 | 415 |
| EPHA8      | 237   | 17.5 | 4  | 13.54 | 416 |
| KCNB1      | 88    | 6.5  | 5  | 13.54 | 417 |
| ALG1       | 115   | 8.5  | 6  | 13.53 | 418 |
| TRIP13     | 250   | 18.5 | 6  | 13.51 | 419 |
| EVPL       | 67.5  | 5    | 6  | 13.50 | 420 |
| HDAC10     | 303   | 22.5 | 10 | 13.47 | 421 |
| MARS       | 87.5  | 6.5  | 5  | 13.46 | 422 |
| GRIN2C     | 175   | 13   | 11 | 13.46 | 423 |
| KLRG2      | 74    | 5.5  | 5  | 13.45 | 424 |
| ABCB6      | 195   | 14.5 | 10 | 13.45 | 425 |
| ATP8B1     | 94    | 7    | 5  | 13.43 | 426 |
| MAPK15     | 127.5 | 9.5  | 7  | 13.42 | 427 |
| ZNHIT2     | 288.5 | 21.5 | 6  | 13.42 | 428 |
| PSMB4      | 80.5  | 6    | 5  | 13.42 | 429 |
| CCNI2      | 67    | 5    | 7  | 13.40 | 430 |
| SCRT2      | 67    | 5    | 2  | 13.40 | 431 |
| SPSB3      | 67    | 5    | 8  | 13.40 | 432 |
| RPH3AL     | 140.5 | 10.5 | 5  | 13.38 | 433 |
| SLC39A4    | 267.5 | 20   | 16 | 13.38 | 434 |
| CABP2      | 180.5 | 13.5 | 13 | 13.37 | 435 |
| ITGB5      | 73.5  | 5.5  | 6  | 13.36 | 436 |
| WNT6       | 73.5  | 5.5  | 6  | 13.36 | 437 |
| NBR2       | 120   | 9    | 5  | 13.33 | 438 |
| ATP6VOCP3  | 106.5 | 8    | 6  | 13.31 | 439 |
| ACSL6      | 66.5  | 5    | 3  | 13.30 | 440 |
| CCDC130    | 66.5  | 5    | 6  | 13.30 | 441 |
| MRPS34     | 66.5  | 5    | 3  | 13.30 | 442 |

|             |       |      |    |       |     |
|-------------|-------|------|----|-------|-----|
| PRAP1       | 66.5  | 5    | 2  | 13.30 | 443 |
| LRRFIP1     | 166   | 12.5 | 6  | 13.28 | 444 |
| ADCY9       | 73    | 5.5  | 5  | 13.27 | 445 |
| KAT5        | 146   | 11   | 4  | 13.27 | 446 |
| CDC42       | 99.5  | 7.5  | 8  | 13.27 | 447 |
| FAM64A      | 112.5 | 8.5  | 3  | 13.24 | 448 |
| MYO7B       | 112.5 | 8.5  | 9  | 13.24 | 449 |
| CLASRP      | 198.5 | 15   | 8  | 13.23 | 450 |
| EXOSC10     | 119   | 9    | 5  | 13.22 | 451 |
| CTDSPL2     | 92.5  | 7    | 4  | 13.21 | 452 |
| NANOS2      | 66    | 5    | 5  | 13.20 | 453 |
| PABPN1L     | 66    | 5    | 5  | 13.20 | 454 |
| GNA15       | 178   | 13.5 | 11 | 13.19 | 455 |
| GOLT1A      | 72.5  | 5.5  | 5  | 13.18 | 456 |
| TFAP2C      | 112   | 8.5  | 8  | 13.18 | 457 |
| OPN1MW      | 79    | 6    | 8  | 13.17 | 458 |
| JAK3        | 118.5 | 9    | 7  | 13.17 | 459 |
| GPR35       | 85.5  | 6.5  | 6  | 13.15 | 460 |
| LHB         | 177.5 | 13.5 | 5  | 13.15 | 461 |
| BSND        | 144.5 | 11   | 4  | 13.14 | 462 |
| UNC93B1     | 144.5 | 11   | 3  | 13.14 | 463 |
| C8orf56     | 98.5  | 7.5  | 3  | 13.13 | 464 |
| MIR593      | 65.5  | 5    | 4  | 13.10 | 465 |
| PAPOLA      | 65.5  | 5    | 3  | 13.10 | 466 |
| APCDD1L-AS1 | 131   | 10   | 9  | 13.10 | 467 |
| RNU1-108P   | 78.5  | 6    | 5  | 13.08 | 468 |
| PHRF1       | 170   | 13   | 5  | 13.08 | 469 |
| PAX7        | 98    | 7.5  | 8  | 13.07 | 470 |
| TPSG1       | 222   | 17   | 12 | 13.06 | 471 |
| LY6E        | 137   | 10.5 | 8  | 13.05 | 472 |
| ACAP1       | 65    | 5    | 4  | 13.00 | 473 |
| DOK6        | 65    | 5    | 3  | 13.00 | 474 |
| CPZ         | 71.5  | 5.5  | 6  | 13.00 | 475 |
| MTMR9LP     | 71.5  | 5.5  | 6  | 13.00 | 476 |
| WHSC1L1     | 71.5  | 5.5  | 5  | 13.00 | 477 |
| ANKRD36BP2  | 84.5  | 6.5  | 4  | 13.00 | 478 |
| LRRC38      | 84.5  | 6.5  | 7  | 13.00 | 479 |
| WNT2        | 91    | 7    | 8  | 13.00 | 480 |
| MDK         | 97.5  | 7.5  | 7  | 13.00 | 481 |
| ZC3HAV1     | 117   | 9    | 6  | 13.00 | 482 |
| C1orf54     | 175.5 | 13.5 | 2  | 13.00 | 483 |
| TPBGL       | 201.5 | 15.5 | 5  | 13.00 | 484 |
| SSTR5-AS1   | 325   | 25   | 17 | 13.00 | 485 |
| OBSL1       | 188   | 14.5 | 5  | 12.97 | 486 |
| SOHLH1      | 103.5 | 8    | 7  | 12.94 | 487 |
| ATP6V1G1P3  | 97    | 7.5  | 8  | 12.93 | 488 |
| ATP5I       | 194   | 15   | 4  | 12.93 | 489 |
| FOXRED2     | 194   | 15   | 4  | 12.93 | 490 |
| LINC00051   | 194   | 15   | 12 | 12.93 | 491 |
| SLC7A9      | 90.5  | 7    | 5  | 12.93 | 492 |
| GPR25       | 84    | 6.5  | 4  | 12.92 | 493 |
| FBLN1       | 329.5 | 25.5 | 12 | 12.92 | 494 |
| CACNG7      | 77.5  | 6    | 6  | 12.92 | 495 |
| HTR2C       | 71    | 5.5  | 8  | 12.91 | 496 |
| ATP13A2     | 64.5  | 5    | 3  | 12.90 | 497 |
| DDX55       | 64.5  | 5    | 4  | 12.90 | 498 |

|           |      |   |   |       |     |
|-----------|------|---|---|-------|-----|
| RNA5SP393 | 64.5 | 5 | 5 | 12.90 | 499 |
| MRPS24    | 116  | 9 | 3 | 12.89 | 500 |

**Supplementary Table S23. Statistical overrepresentation test of the top 500 *de novo* and fold change 5hmC-gaining promoters after *TET1* overexpression.**  
 The top 5hmC-gaining promoters after induced overexpression of *TET1* were analyzed using the PANTHER Overrepresentation Test with default settings.

Analysis Type: PANTHER Overrepresentation Test (release 20150430)  
 Annotation Version and Release Date: PANTHER version 10.0 Released 2015-05-15  
 Bonferroni correction for multiple testing  
 Annotation Data Set: PANTHER GO-Slim Biological Process

Reference List:  
 Homo sapiens (all genes in database)

Reference list  
 20814  
 0

Mapped IDs:  
 Unmapped IDs:

Displaying only results with P<0.05

|                                                             |  | <i>TET1</i> overexpression                                     |          |                 |      |            |                                                             |          |                 |     |         |
|-------------------------------------------------------------|--|----------------------------------------------------------------|----------|-----------------|------|------------|-------------------------------------------------------------|----------|-----------------|-----|---------|
| Homo sapiens (REF)                                          |  | Top 500 <i>de novo</i> 5hmC-gaining promoters (406 mapped IDs) |          |                 |      |            | Top 500 fold change 5hmC-gaining promoters (424 mapped IDs) |          |                 |     |         |
| #                                                           |  | #                                                              | expected | Fold Enrichment | +/-  | P value    | #                                                           | expected | Fold Enrichment | +/- | P value |
| PANTHER GO-Slim Biological Process<br>biological regulation |  | 3918                                                           | 110      | 76.42           | 1.44 | + 6.51E-03 |                                                             |          |                 |     |         |

**Supplementary Table S24. List of 18 promoters characterized by differential methylation according to BeadChip analyses and by *de novo* or fold change 5hmC increase after induced overexpression of *TET1*.**

From the 500 top-ranked, mostly hypomethylated promoters identified after *TET1* overexpression, 18 promoters were among the top 500 *de novo* or fold change 5hmC-gaining promoters.

|                              | gene_symbol | 450K_beta.TET1+Dox | 450K_beta.TET1-Dox | 450K_beta_difference | 450K_num.sites | RRHP_de_novo_reads | RRHP_+Dox_reads | RRHP_-Dox_reads | RRHP_fold_change | RRHP_5hmC_sites |
|------------------------------|-------------|--------------------|--------------------|----------------------|----------------|--------------------|-----------------|-----------------|------------------|-----------------|
| <i>de novo</i> 5hmC increase | SHISA5      | 0.734637015        | 0.649913597        | 0.084723418          | 3              | 98.5               | -               | -               | -                | 5               |
|                              | FAM27E2     | 0.586671306        | 0.47688265         | 0.109788656          | 1              | 92.5               | -               | -               | -                | 6               |
|                              | METTL21A    | 0.416876715        | 0.363769164        | 0.053107551          | 5              | 90                 | -               | -               | -                | 7               |
|                              | RDH8        | 0.576190123        | 0.649119278        | -0.072929155         | 4              | 80                 | -               | -               | -                | 4               |
|                              | BBS10       | 0.241064635        | 0.131405949        | 0.109658686          | 13             | 64.5               | -               | -               | -                | 4               |
|                              | PSMD2       | 0.078716033        | 0.130606806        | -0.051890773         | 5              | 62                 | -               | -               | -                | 3               |
|                              | SYT3        | 0.464084667        | 0.52910856         | -0.065023893         | 6              | 49.5               | -               | -               | -                | 4               |
|                              | PTP4A2P1    | 0.084815991        | 0.132685376        | -0.047869385         | 2              | -                  | 159.5           | 8               | 19.94            | 6               |
|                              | MYADM       | 0.542498667        | 0.59733302         | -0.054834354         | 11             | -                  | 132.5           | 7.5             | 17.67            | 5               |
|                              | SCARF2      | 0.273210582        | 0.357018311        | -0.083807729         | 10             | -                  | 422.5           | 24.5            | 17.24            | 13              |
| fold change 5hmC increase    | MYD88       | 0.367254643        | 0.453860153        | -0.086605511         | 14             | -                  | 161.5           | 10.5            | 15.38            | 3               |
|                              | RFPL2       | 0.5474095          | 0.614791422        | -0.067381922         | 5              | -                  | 89.5            | 6               | 14.92            | 4               |
|                              | ZNF726      | 0.141953305        | 0.327020175        | -0.18506687          | 1              | -                  | 80              | 5.5             | 14.55            | 6               |
|                              | STAC2       | 0.372307758        | 0.439943887        | -0.06763613          | 10             | -                  | 256.5           | 18              | 14.25            | 10              |
|                              | ALDH1L2     | 0.64340531         | 0.728004041        | -0.084598731         | 11             | -                  | 70              | 5               | 14.00            | 7               |
|                              | BHLHE23     | 0.561227896        | 0.63558759         | -0.074359695         | 9              | -                  | 311.5           | 23              | 13.54            | 12              |
|                              | MAPK15      | 0.522963163        | 0.600589664        | -0.077626502         | 14             | -                  | 127.5           | 9.5             | 13.42            | 7               |
|                              | CPZ         | 0.530963413        | 0.57741693         | -0.046453517         | 10             | -                  | 71.5            | 5.5             | 13.00            | 6               |

**Table S25.** Results of the HOMER *de novo* motif discovery.

**Enriched motifs near the top 5,000 hypomethylated CpG sites after *TET1* overexpression**

| Rank | Motif                                                                             | P-value | log P-value | % of Targets | % of Background | Best Match/Details                                    |
|------|-----------------------------------------------------------------------------------|---------|-------------|--------------|-----------------|-------------------------------------------------------|
| 1    |  | 1e-32   | -7.508e+01  | 8.90%        | 4.83%           | Fra1(bZIP)/BT549-Fra1-ChIP-Seq(GSE46166)/Homer(0.981) |
| 2    |  | 1e-12   | -2.800e+01  | 2.08%        | 0.94%           | byn/dmmpmm(SeSiMCMC)/fly(0.726)                       |

**Enriched motifs near the top 5,000 hypermethylated CpG sites after *TET* triple knockdown**

| Rank | Motif                                                                               | P-value | log P-value | % of Targets | % of Background | Best Match/Details                                                |
|------|-------------------------------------------------------------------------------------|---------|-------------|--------------|-----------------|-------------------------------------------------------------------|
| 1    |   | 1e-20   | -4.832e+01  | 12.12%       | 8.17%           | Ets1-distal(ETS)/CD4+-PolIII-ChIP-Seq(Barski et al.)/Homer(0.932) |
| 2    |  | 1e-19   | -4.417e+01  | 46.22%       | 39.86%          | MA0598.1_EHF/Jaspar(0.688)                                        |
| 3    |  | 1e-18   | -4.270e+01  | 0.46%        | 0.03%           | ROX1/Literature(Harbison)/Yeast(0.704)                            |
| 4    |  | 1e-17   | -4.045e+01  | 0.70%        | 0.10%           | MA0592.1_ESRRA/Jaspar(0.679)                                      |
| 5    |  | 1e-16   | -3.704e+01  | 0.26%        | 0.01%           | MA0035.3_Gata1/Jaspar(0.649)                                      |
| 6    |  | 1e-15   | -3.580e+01  | 6.00%        | 3.64%           | HLHm5/dmmpmm(Pollard)/fly(0.669)                                  |
| 7    |  | 1e-15   | -3.573e+01  | 1.02%        | 0.25%           | Oct2(POU,Homeobox)/Bcell-Oct2-ChIP-Seq(GSE21512)/Homer(0.638)     |
| 8    |  | 1e-14   | -3.450e+01  | 0.64%        | 0.10%           | Unknown3/Arabidopsis-Promoters/Homer(0.616)                       |
| 9    |  | 1e-14   | -3.441e+01  | 2.20%        | 0.92%           | MA0329.1_MBP1/Jaspar(0.675)                                       |



|    |                                                                                     |       |            |        |        |                                                                           |
|----|-------------------------------------------------------------------------------------|-------|------------|--------|--------|---------------------------------------------------------------------------|
| 10 |    | 1e-14 | -3.429e+01 | 0.98%  | 0.24%  | PB0047.1_Myf6_1/Jaspar(0.683)                                             |
| 11 |    | 1e-14 | -3.416e+01 | 0.46%  | 0.04%  | Reverb(NR),DR2/RAW-Reverba.<br>biotin-ChIP-Seq<br>(GSE45914)/Homer(0.648) |
| 12 |    | 1e-14 | -3.405e+01 | 0.64%  | 0.10%  | MA0362.1_RDS2/Jaspar(0.796)                                               |
| 13 |    | 1e-14 | -3.363e+01 | 19.52% | 15.36% | hkb/dmmpmm(Papatsenko)/<br>fly(0.844)                                     |
| 14 |    | 1e-14 | -3.361e+01 | 4.62%  | 2.64%  | GAMYB(MYB)/Hordeum<br>vulgare/AthaMap(0.590)                              |
| 15 |    | 1e-14 | -3.319e+01 | 0.24%  | 0.01%  | MA0427.1_YJL103C/Jaspar(0.643)                                            |
| 16 |    | 1e-14 | -3.316e+01 | 0.40%  | 0.03%  | MET31(Maclsaac)/Yeast(0.654)                                              |
| 17 |  | 1e-14 | -3.262e+01 | 47.88% | 42.43% | MA0056.1_MZF1_1-4/Jaspar(0.818)                                           |
| 18 |  | 1e-13 | -3.204e+01 | 21.16% | 16.96% | PB0100.1_Zfp740_1/Jaspar(0.718)                                           |
| 19 |  | 1e-13 | -3.156e+01 | 0.62%  | 0.10%  | PB0155.1_Osr2_2/Jaspar(0.669)                                             |
| 20 |  | 1e-13 | -3.152e+01 | 0.38%  | 0.03%  | MA0123.1_abi4/Jaspar(0.689)                                               |
| 21 |  | 1e-13 | -3.060e+01 | 0.24%  | 0.01%  | Smad4(MAD)/ESC-SMAD4-ChIP-<br>Seq(GSE29422)/Homer(0.684)                  |
| 22 |  | 1e-13 | -3.039e+01 | 3.80%  | 2.11%  | byn/dmmpmm(Pollard)/fly(0.675)                                            |
| 23 |  | 1e-12 | -2.946e+01 | 18.60% | 14.79% | PB0199.1_Zfp161_2/Jaspar(0.870)                                           |
| 24 |  | 1e-12 | -2.914e+01 | 1.04%  | 0.31%  | UME1/UME1_YPD/[(Harbison)/<br>Yeast(0.683)                                |

|    |                                                                                   |       |            |       |       |                                                |
|----|-----------------------------------------------------------------------------------|-------|------------|-------|-------|------------------------------------------------|
| 25 |  | 1e-12 | -2.825e+01 | 8.38% | 5.85% | SeqBias: CA-repeat(0.858)                      |
| 26 |  | 1e-12 | -2.818e+01 | 7.60% | 5.20% | ara/dmmpmm(Pollard)/fly(0.789)                 |
| 27 |  | 1e-12 | -2.766e+01 | 0.22% | 0.01% | SKN7/SKN7_H2O2Lo/[]<br>(Harbison)/Yeast(0.604) |

### Enriched motifs near the top 5,000 *de novo* 5hmC-gaining CpG sites after *TET1* overexpression

| Rank | Motif                                                                               | P-value | log P-value | % of Targets | % of Background | Best Match/Details             |
|------|-------------------------------------------------------------------------------------|---------|-------------|--------------|-----------------|--------------------------------|
| 1    |    | 1e-164  | -3.781e+02  | 55.84%       | 36.70%          | MA0280.1_CAT8/Jaspar(0.841)    |
| 2    |    | 1e-16   | -3.736e+01  | 0.36%        | 0.02%           | Dr/dmmpmm(Noyes_hd)/fly(0.651) |
| 3    |  | 1e-14   | -3.334e+01  | 46.14%       | 40.67%          | ttk/dmmpmm(Bigfoot)/fly(0.766) |
| 4    |  | 1e-14   | -3.238e+01  | 13.64%       | 10.19%          | MA0485.1_Hoxc9/Jaspar(0.763)   |
| 5    |  | 1e-14   | -3.235e+01  | 5.62%        | 3.45%           | MA0280.1_CAT8/Jaspar(0.635)    |
| 6    |  | 1e-13   | -3.049e+01  | 24.84%       | 20.48%          | PB0143.1_Klf7_2/Jaspar(0.742)  |
| 7    |  | 1e-12   | -2.785e+01  | 25.96%       | 21.73%          | SWI4(MacIsaac)/Yeast(0.818)    |

Enriched motifs near the top 5,000 fold change 5hmC-gaining CpG sites after *TET1* overexpression

| Rank | Motif                                                                               | P-value | log P-value | % of Targets | % of Background | Best Match/Details                            |
|------|-------------------------------------------------------------------------------------|---------|-------------|--------------|-----------------|-----------------------------------------------|
| 1    |    | 1e-312  | -7.185e+02  | 56.18%       | 30.26%          | MA0280.1_CAT8/Jaspar(0.829)                   |
| 2    |    | 1e-22   | -5.167e+01  | 4.50%        | 2.17%           | MA0473.1_ELF1/Jaspar(0.722)                   |
| 3    |    | 1e-20   | -4.630e+01  | 10.68%       | 7.06%           | PHD1/PHD1_BUT90/8-SUT1(Harbison)/Yeast(0.685) |
| 4    |    | 1e-17   | -3.999e+01  | 38.44%       | 32.64%          | POL010.1_DCE_S_III/Jaspar(0.667)              |
| 5    |    | 1e-17   | -3.991e+01  | 3.76%        | 1.88%           | MA0280.1_CAT8/Jaspar(0.665)                   |
| 6    |   | 1e-16   | -3.810e+01  | 19.14%       | 14.76%          | PL0017.1_hlh-2::hlh-10/Jaspar(0.726)          |
| 7    |  | 1e-15   | -3.554e+01  | 52.70%       | 46.97%          | MA0403.1_TBF1/Jaspar(0.736)                   |
| 8    |  | 1e-15   | -3.477e+01  | 38.06%       | 32.68%          | MA0067.1_Pax2/Jaspar(0.726)                   |
| 9    |  | 1e-14   | -3.406e+01  | 39.98%       | 34.59%          | Initiator/Drosophila-Promoters/Homer(0.791)   |
| 10   |  | 1e-14   | -3.345e+01  | 15.46%       | 11.74%          | Trl/dmmpmm(Pollard)/fly(0.641)                |
| 11   |  | 1e-14   | -3.333e+01  | 35.36%       | 30.20%          | MA0294.1_EDS1/Jaspar(0.815)                   |
| 12   |  | 1e-13   | -3.190e+01  | 0.28%        | 0.01%           | PB0174.1_Sox30_2/Jaspar(0.700)                |
| 13   |  | 1e-13   | -3.170e+01  | 15.22%       | 11.62%          | MA0391.1_STB4/Jaspar(0.728)                   |

|    |                                                                                   |       |            |        |        |                                                       |
|----|-----------------------------------------------------------------------------------|-------|------------|--------|--------|-------------------------------------------------------|
| 14 |  | 1e-13 | -3.106e+01 | 0.24%  | 0.01%  | MA0256.1_zen/Jaspar(0.758)                            |
| 15 |  | 1e-13 | -3.034e+01 | 0.24%  | 0.01%  | PH0062.1_Hoxb7/Jaspar(0.692)                          |
| 16 |  | 1e-12 | -2.913e+01 | 22.80% | 18.68% | ETS1(ETS)/Jurkat-ETS1-ChIP-Seq(GSE17954)/Homer(0.699) |
| 17 |  | 1e-12 | -2.826e+01 | 41.94% | 37.01% | MA0282.1_CEP3/Jaspar(0.725)                           |

**Supplementary Table S26. Primers and UPL probes used for qRT-PCR.**

The ProbeFinder Software is available at the Assay Design Center (<http://lifescience.roche.com/webapp/wcs/stores/servlet/CategoryDisplay?catalogId=10001&tab=&identifier=Universal+Probe+Library&langId=-1#tab-3>).

| <b>Gene symbol</b> | <b>Primer name</b> | <b>Sequence (5' to 3')</b> | <b>UPL probe</b> |
|--------------------|--------------------|----------------------------|------------------|
| <i>TET1</i>        | Taq_TET1_for       | tctgttgttgctcctgga         | #57              |
|                    | Taq_TET1_rev       | gcctttaaactttgggcttc       |                  |
| <i>GAPDH</i>       | Taq_GAPDH_for      | agccacatcgctcagacac        | #60              |
|                    | Taq_GAPDH_rev      | gccaatacgaccaaattcc        |                  |
| <i>TET2</i>        | Taq_TET2_B_for     | aaacttactcggagcttaccg      | #73              |
|                    | Taq_TET2_B_rev     | tgacaggcgcaagttctct        |                  |
| <i>TET3</i>        | Taq_TET3_for       | ccattgcaaagtgggtga         | #25              |
|                    | Taq_TET3_rev       | cgcaccaggcagagtagc         |                  |
| <i>ASMTL</i>       | Taq_ASMTL_for      | gagaagccggtggacaag         | #89              |
|                    | Taq_ASMTL_rev      | tgtgttctctcccactcaacc      |                  |
| <i>TRAPPC6A</i>    | Taq_TRAPPC6A_for   | gttcagaagcagatggacag       | #52              |
|                    | Taq_TRAPPC6A_rev   | ccagatactgcaggccaga        |                  |
| <i>WIPI1</i>       | Taq_WIPI1_for      | gaccgtagccagaccaagtg       | #41              |
|                    | Taq_WIPI1_rev      | cgccgtcctcagaataacc        |                  |
| <i>ACPL2</i>       | Taq_ACPL2_for      | aataatgctttccgcaacc        | #30              |
|                    | Taq_ACPL2_rev      | accgggatcaggtggaag         |                  |
| <i>ARRDC4</i>      | Taq2_ARRDC4_f      | cactgaccctgccagagc         | #6               |
|                    | Taq2_ARRDC4_r      | tgagggtaaggaggaatgtgtc     |                  |
| <i>ERBB3</i>       | Taq2_ERBB3_f       | ccgagatgctgagatagtgtt      | #29              |
|                    | Taq2_ERBB3_r       | cttgcaaacctcatgacagg       |                  |
| <i>VTA1</i>        | Taq_VTA1_for       | catcaggcaactatactggaataca  | #78              |
|                    | Taq_VTA1_rev       | ggttgatagtattacttgctacacct |                  |
| <i>ZNF678</i>      | Taq2_ZNF678_f      | ttgaactcctccctcaagtg       | #29              |
|                    | Taq2_ZNF678_r      | ctgaatgccagtagtccctgt      |                  |

**Supplementary Table S27. RnBeads settings used for Infinium HumanMethylation450 BeadChip analyses.**

## **Preprocessing**

| <b>Option</b>                     | <b>Value</b>                  |
|-----------------------------------|-------------------------------|
| filtering.whitelist               |                               |
| filtering.blacklist               |                               |
| filtering.snp                     | 3                             |
| filtering.missing.value.quantile  | 1                             |
| filtering.greedy                  | yes                           |
| filtering.greedy.pvalue.threshold | 0.05                          |
| filtering.greedy.rc.ties          | row                           |
| distribution.subsample            | 1000000                       |
| normalization.method              | swan                          |
| normalization.background.method   | methyumi.noob                 |
| normalization.plot.shifts         | yes                           |
| filtering.context.removal         | CC, CAG, CAH, CTG, CTH, Other |
| filtering.missing.value.quantile  | 1                             |
| filtering.sex.chromosomes.removal | no                            |
| filtering.deviation.threshold     | 0                             |
| distribution.subsample            | 1000000                       |

## **Exploratory Analysis**

| <b>Option</b>          | <b>Value</b> |
|------------------------|--------------|
| replicate.id.column    | default      |
| distribution.subsample | 1000000      |

## **Differential Methylation**

| <b>Option</b>                                | <b>Value</b> |
|----------------------------------------------|--------------|
| analyze.sites                                | yes          |
| region.types                                 | default      |
| differential.permutations                    | 0            |
| differential.comparison.columns              | default      |
| differential.comparison.columns.all.pairwise | default      |
| columns.pairing                              | default      |
| differential.site.test.method                | limma        |
| covariate.adjustment.columns                 | default      |
| differential.adjustment.sva                  | yes          |
| differential.adjustment.celltype             | yes          |
